# Supplementary material for: What is the cost-effectiveness of menu calorie labelling on reducing obesity-associated cancer burdens? An economic evaluation of a federal policy intervention among 235 million adults in the USA
Source: PubMed Central journal article supplement — BMJ Open. 2023 Mar 9;13(4):e063614. doi: 10.1136/bmjopen-2022-063614 (PMC10186398; doi:10.1136/bmjopen-2022-063614), 2023-03-09

# BMJ Open

BMJ Open is committed to open peer review. As part of this commitment we make the peer review history of every article we publish publicly available.

When an article is published we post the peer reviewers' comments and the authors' responses online. We also post the versions of the paper that were used during peer review. These are the versions that the peer review comments apply to.

The versions of the paper that follow are the versions that were submitted during the peer review process. They are not the versions of record or the final published versions. They should not be cited or distributed as the published version of this manuscript.

BMJ Open is an open access journal and the full, final, typeset and author-corrected version of record of the manuscript is available on our site with no access controls, subscription charges or pay-per-view fees (<http://bmjopen.bmj.com>).

If you have any questions on BMJ Open's open peer review process please email [info.bmjopen@bmj.com](mailto:info.bmjopen@bmj.com)

# BMJ Open

## Cost-Effectiveness Analysis of the Federal Menu Calorie Labeling and Obesity-Associated Cancer Burdens in the United States

|                               |                                                                                                                                                                                                                                                                                                                                                                                                                                                                                                                                                                                                                                                                                                                                                                                                                                                                                                                                                                                                                                  |
|-------------------------------|----------------------------------------------------------------------------------------------------------------------------------------------------------------------------------------------------------------------------------------------------------------------------------------------------------------------------------------------------------------------------------------------------------------------------------------------------------------------------------------------------------------------------------------------------------------------------------------------------------------------------------------------------------------------------------------------------------------------------------------------------------------------------------------------------------------------------------------------------------------------------------------------------------------------------------------------------------------------------------------------------------------------------------|
| Journal:                      | <i>BMJ Open</i>                                                                                                                                                                                                                                                                                                                                                                                                                                                                                                                                                                                                                                                                                                                                                                                                                                                                                                                                                                                                                  |
| Manuscript ID                 | bmjopen-2022-063614                                                                                                                                                                                                                                                                                                                                                                                                                                                                                                                                                                                                                                                                                                                                                                                                                                                                                                                                                                                                              |
| Article Type:                 | Original research                                                                                                                                                                                                                                                                                                                                                                                                                                                                                                                                                                                                                                                                                                                                                                                                                                                                                                                                                                                                                |
| Date Submitted by the Author: | 07-Apr-2022                                                                                                                                                                                                                                                                                                                                                                                                                                                                                                                                                                                                                                                                                                                                                                                                                                                                                                                                                                                                                      |
| Complete List of Authors:     | Du, Mengxi; Tufts University Friedman School of Nutrition Science and Policy,<br>Griecci, Christina; Tufts University - Boston Campus, Friedman School of Nutrition and Policy<br>Cudhea, Frederick; Tufts University Friedman School of Nutrition Science and Policy<br>Eom, Heesun; New York Academy of Medicine, REAP<br>Wong, John; Tufts Medical Center, Institute of Clinical Research and Health Policy Studies<br>Wilde, Parke; Tufts University Friedman School of Nutrition Science and Policy<br>Kim, David; Tufts Medical Center, Center for the Evaluation of Value and Risk in Health, Institute for Clinical Research and Health Policy Studies<br>Michaud, Dominique; Tufts University School of Medicine,<br>Wang, Y. Claire; Columbia University Mailman School of Public Health, Department of Health Policy and Management<br>Mozaffarian, Dariush; Friedman School of Nutrition Science and Policy, Tufts University,<br>Zhang, Fang-Fang; Tufts University Friedman School of Nutrition Science and Policy |
| Keywords:                     | Health policy < HEALTH SERVICES ADMINISTRATION & MANAGEMENT, NUTRITION & DIETETICS, HEALTH ECONOMICS                                                                                                                                                                                                                                                                                                                                                                                                                                                                                                                                                                                                                                                                                                                                                                                                                                                                                                                             |
|                               |                                                                                                                                                                                                                                                                                                                                                                                                                                                                                                                                                                                                                                                                                                                                                                                                                                                                                                                                                                                                                                  |

SCHOLARONE™  
Manuscripts

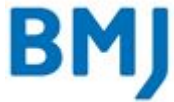

I, the Submitting Author has the right to grant and does grant on behalf of all authors of the Work (as defined in the below author licence), an exclusive licence and/or a non-exclusive licence for contributions from authors who are: i) UK Crown employees; ii) where BMJ has agreed a CC-BY licence shall apply, and/or iii) in accordance with the terms applicable for US Federal Government officers or employees acting as part of their official duties; on a worldwide, perpetual, irrevocable, royalty-free basis to BMJ Publishing Group Ltd ("BMJ") its licensees and where the relevant Journal is co-owned by BMJ to the co-owners of the Journal, to publish the Work in this journal and any other BMJ products and to exploit all rights, as set out in our [licence](#).

The Submitting Author accepts and understands that any supply made under these terms is made by BMJ to the Submitting Author unless you are acting as an employee on behalf of your employer or a postgraduate student of an affiliated institution which is paying any applicable article publishing charge ("APC") for Open Access articles. Where the Submitting Author wishes to make the Work available on an Open Access basis (and intends to pay the relevant APC), the terms of reuse of such Open Access shall be governed by a Creative Commons licence – details of these licences and which [Creative Commons](#) licence will apply to this Work are set out in our licence referred to above.

Other than as permitted in any relevant BMJ Author's Self Archiving Policies, I confirm this Work has not been accepted for publication elsewhere, is not being considered for publication elsewhere and does not duplicate material already published. I confirm all authors consent to publication of this Work and authorise the granting of this licence.

1  
2  
3 1 **Cost-Effectiveness Analysis of the Federal Menu Calorie Labeling and Obesity-Associated**  
4  
5 2 **Cancer Burdens in the United States**  
6

7  
8 3 Mengxi Du, doctoral candidate<sup>1</sup>, Christina F. Griecci, postdoctoral fellow<sup>1</sup>, Frederick F. Cudhea,  
9  
10 4 statistician<sup>1</sup>, Heesun Eom, research assistant<sup>1,2</sup>, John B. Wong, director of comparative  
11  
12 5 effectiveness research<sup>3</sup>, Parke Wilde, professor of food and nutrition policy<sup>1</sup>, David D. Kim,  
13  
14 6 assistant professor of medicine<sup>4</sup>, Dominique S. Michaud, professor of public health and  
15  
16 7 community medicine<sup>5</sup>, Y. Claire Wang, associate professor, vice president of research,  
17  
18 8 evaluation and policy<sup>2,6</sup>, Dariush Mozaffarian, dean and Jean Mayer professor of nutrition<sup>1</sup>,  
19  
20 9 Fang Fang Zhang, Neely Family professor of nutrition and cancer<sup>1</sup> *on behalf of the Food-PRICE*  
21  
22 10 *Project*  
23

24  
25  
26 11 1. Friedman School of Nutrition Science & Policy, Tufts University, Boston, MA  
27

28  
29 12 2. New York Academy of Medicine, New York, NY  
30

31  
32 13 3. Division of Clinical Decision Making, Tufts Medical Center, Boston, MA  
33

34  
35 14 4. Center for the Evaluation of Value and Risk in Health, Institute for Clinical Research and  
36  
37 15 Health Policy Studies, Tufts Medical Center, Boston, MA  
38

39  
40 16 5. Department of Public Health and Community Medicine, School of Medicine, Tufts University,  
41  
42 17 Boston, MA  
43

44  
45 18 6. Department of Health Policy and Management, Mailman School of Public Health, Columbia  
46  
47 19 University, New York, NY  
48

49  
50 20 **Short Running Head:** Cost-Effectiveness of Menu Calorie Labeling to Prevent Cancer  
51

52  
53 21 **Word Count:** 3367  
54  
55  
56  
57  
58  
59  
60

1  
2  
3 22 **Corresponding Author:** Fang Fang Zhang, M.D., Ph.D., Friedman School of Nutrition Science  
4  
5 23 and Policy, Tufts University, 150 Harrison Avenue, Boston, MA 02111  
6  
7 24 ([fang\\_fang\\_zhang@tufts.edu](mailto:fang_fang_zhang@tufts.edu)). Phone: 617-636-3740; Fax: 617-636-3727  
8  
9  
10 25 **Abbreviations:** AMPM, Automated Multiple Pass Method; BMI, Body Mass Index; CDC,  
11  
12 26 Centers of Disease Control and Prevention; CI, Confidence Interval; DiCOM, Diet and Cancer  
13  
14 27 Outcome Model; FDA, Food and Drug Administration; FNDDS, Food and Nutrient Database for  
15  
16 28 Dietary Studies; MEC, Mobile Examination Center; NCHS, National Center for Health  
17  
18 29 Statistics; NHANES, National Health and Nutrition Examination Survey; PSA, Probabilistic  
19  
20 30 sensitivity analysis; SD, Standard Deviation; SE, Standard Error; USDA, United States  
21  
22 31 Department of Agriculture; UI, Uncertainty Interval  
23  
24  
25  
26  
27  
28  
29  
30  
31  
32  
33  
34  
35  
36  
37  
38  
39  
40  
41  
42  
43  
44  
45  
46  
47  
48  
49  
50  
51  
52  
53  
54  
55  
56  
57  
58  
59  
60

1  
2  
3 **32 ABSTRACT**  
4

5 **33 Objective** To assess the impact of menu calorie labeling on reducing obesity-associated cancer  
6  
7  
8 **34** burdens in the United States (US).  
9

10 **35 Design** Cost-effectiveness analysis using a probabilistic cohort state-transition model.  
11

12 **36 Setting** Policy intervention.  
13

14 **37 Participants** 235 million adults aged 20+ years.  
15

16  
17 **38 Interventions** The policy effects on reducing 13 obesity-associated cancers among US adults  
18  
19  
20  
21  
22  
23  
24  
25  
26  
27  
28  
29  
30  
31  
32  
33  
34  
35  
36  
37  
38  
39  
40  
41  
42  
43  
44  
45  
46  
47  
48  
49  
50  
51  
52  
53  
54  
55  
56  
57  
58  
59  
60

and population subgroups by age, sex, and race/ethnicity over a simulated lifetime were evaluated in two scenarios: (1) effects on consumer behaviors; and (2) additional effects on industry reformulation. The model integrated nationally representative demographics, calorie intake from restaurants, cancer statistics, associations of policy with calorie intake, dietary change with BMI change, BMI with cancer rates, and policy and healthcare costs.

**44 Main outcome measures** Health and economic gains were estimated among the total population and population subgroups defined by age, sex, and race/ethnicity. Net costs and incremental cost-effectiveness ratio were assessed from societal and health care perspectives. Probabilistic sensitivity analyses incorporated uncertainty in input parameters and generated 95% uncertainty intervals (UIs).

**49 Results** Considering consumer behavior alone, the menu calorie labeling was estimated to be associated with a reduction of 28 000 (95% UI: 16 300-39 100) new cancer cases and 16 700 (9610-23 600) cancer deaths, a gain of 111 000 (64 800-158 000) quality-adjusted life years, and a saving of \$1480 million (\$884 million-\$2080 million) in cancer-related medical costs among US adults. The policy was associated with net cost savings of \$1460 (\$864-\$2060) million and \$1350 (\$486-\$2260) million from healthcare and societal perspectives, respectively. Additional

1  
2  
3 55 industry reformulation would substantially increase policy impact. Greater health gains and cost  
4  
5 56 savings were observed among young adults, Hispanic and non-Hispanic Black individuals.

6  
7  
8 57 **Conclusions** Study findings suggest that menu calorie labeling is associated with lower obesity-  
9  
10 58 related cancer burdens and reduced healthcare costs. Policymakers may prioritize nutrition  
11  
12 59 policies for cancer prevention in the US.

13  
14  
15 60 (Word Count: 299)

16  
17 61 **Keywords:** obesity, cost-effectiveness, menu calorie labeling, cancer incidence, cancer death,  
18  
19 62 medical cost

20  
21  
22 63  
23  
24  
25  
26  
27  
28  
29  
30  
31  
32  
33  
34  
35  
36  
37  
38  
39  
40  
41  
42  
43  
44  
45  
46  
47  
48  
49  
50  
51  
52  
53  
54  
55  
56  
57  
58  
59  
60

## 64 INTRODUCTION

65 Obesity affects 1 in 3 Americans and is an established risk factor for 13 types of cancers, such as  
66 endometrial, liver, breast, prostate, and colorectal cancers.<sup>1</sup> Obesity-associated cancer represents  
67 40% of all newly diagnosed cancer cases and contributes to \$147 billion in costs in healthcare  
68 each year.<sup>1-6</sup> Rates of obesity-associated cancers are also rising disproportionately among young  
69 adults.<sup>5,7</sup> Substantial health and economic burdens highlight the need to prioritize cost-effective  
70 strategies to reduce obesity-associated cancers in the US.

71  
72 Diet is one of the few modifiable factors for both obesity and obesity-associated cancers.<sup>2,8</sup>  
73 Restaurant meals account for 1 in 5 calories consumed by US adults, including 9% of calories  
74 from full-service restaurants and 12% from fast-food restaurants,<sup>9</sup> is an important target for  
75 improving population diet. Restaurant meals can have very high calories, with a mean energy of  
76 1362 kcal/meal and 969 kcal/meal in popular meals from randomly selected full-service and fast-  
77 food restaurants, respectively.<sup>10</sup> Consistently, individuals who cook less frequently at home  
78 consume more daily calories than those who cook more at home.<sup>11</sup> Thus, reducing calories  
79 consumed from restaurant meals has the potential to reduce daily calorie intake and subsequent  
80 obesity and obesity-related cancer burdens.

81  
82 To help consumers make lower-calorie choices, the Affordable Care Act mandated that all chain  
83 restaurants with 20 or more outlets post calorie information on menus and menu boards for all  
84 standard menu items.<sup>12</sup> The FDA published the final rules for this policy in 2016, which was  
85 subsequently implemented in 2018. Interventional studies demonstrate that menu calorie labeling  
86 reduces total energy intake by consumers.<sup>13,14</sup> Such policy can also motivate restaurant



1  
2  
3 87 reformulation to lower calorie contents or introduce healthier food options.<sup>15-20</sup> Prior research  
4  
5 88 suggests that this policy is associated with substantial reductions in incident cardiovascular  
6  
7 89 diseases and type 2 diabetes and net savings of over \$10 billion.<sup>21</sup> However, the health and  
8  
9  
10 90 economic benefits of the policy for obesity-associated cancers have not been evaluated. This  
11  
12 91 study aimed to address the knowledge gap by evaluating the cost-effectiveness of the federal  
13  
14 92 menu calorie labeling and obesity-associated cancer burdens among US adults.  
15  
16  
17 93

## 19 94 **METHODS**

### 21 95 **Study Overview**

23  
24 96 The Diet and Cancer Outcome (DiCOM), a probabilistic cohort state-transition model,<sup>22 23</sup> was  
25  
26 97 used to perform an economic evaluation of the menu calorie labeling and obesity-associated  
27  
28 98 cancer rates among 235 million US adults over a simulated lifetime (Supplementary Figure 1).  
29  
30 99 The model integrated independent parameters from different data sources, including nationally  
31  
32  
33 100 representative population demographics, dietary intake, and cancer statistics; association  
34  
35 101 estimates of policy intervention with diet, diet change with body mass index (BMI), and BMI  
36  
37 102 with cancer risks; and policy and health-related costs from established sources (**Table 1**). This  
38  
39 103 study used de-identified datasets and was exempt from institutional review board review and  
40  
41  
42 104 follows the Consolidated Health Economic Evaluation Reporting Standards (CHEERS) reporting  
43  
44  
45 105 guidelines.  
46  
47  
48  
49  
50  
51  
52  
53  
54  
55  
56  
57  
58  
59  
60

**Table 1. Key input parameters and data sources in the Dietary Cancer Outcome Model (DiCOM)**

| Model Input                                                              | Outcome        | Estimates                                                                                                            | Distribution | Comments                                                                                                                                                                                                                                                           | Data Source                                                                                                                                                                                                                |
|--------------------------------------------------------------------------|----------------|----------------------------------------------------------------------------------------------------------------------|--------------|--------------------------------------------------------------------------------------------------------------------------------------------------------------------------------------------------------------------------------------------------------------------|----------------------------------------------------------------------------------------------------------------------------------------------------------------------------------------------------------------------------|
| 1. Simulated population                                                  | Population     | Mean consumption of calories was 332 kcal/d from full-service or fast-food restaurants (Supplementary Tables 1, 8-9) | $\gamma$     | Stratified by age, sex, race/ethnicity; 32 subgroups                                                                                                                                                                                                               | NHANES 2013-2016                                                                                                                                                                                                           |
| 2. Policy effect <sup>1</sup>                                            |                |                                                                                                                      |              |                                                                                                                                                                                                                                                                    |                                                                                                                                                                                                                            |
| a) Consumer behavior                                                     | Policy effect  | 7.3% (4.4%-10.1%)                                                                                                    | $\beta$      | One-time effect                                                                                                                                                                                                                                                    | Meta-analysis of labeling interventions on reducing calorie intake, Shangguan et al., 2019, American Journal of Preventative Medicine                                                                                      |
| b) Industry response                                                     | Policy effect  | 5% (Appendix 1 and Appendix Table 1)                                                                                 | $\beta$      | Assumption: no reformulation in the 1st year of policy intervention; Restaurants will replace the high-calorie menu items with low-calorie options or reformulate the menu items in years 2 to 5 of the intervention to achieve a 5% reduction in calorie contents | Calorie changes in large chain restaurants from 2008 to 2015, Bleich et al. 2017, Prev Med; Higher-Calorie Menu Items Eliminated in Large Chain Restaurants, Bleich et al. 2018, American Journal of Preventative Medicine |
| 3. Effect of added sugar intake on BMI (kg/m <sup>2</sup> ) <sup>1</sup> | Dietary effect | Among individuals with:<br>BMI <25: 0.0015 per kcal<br>BMI ≥25: 0.003 per kcal                                       | Normal       | Assumption: 55 kcal per day reduction in calorie intake would lead to 1 pound weight loss within 1 year, with no further weight loss in the future                                                                                                                 | Hall et al., 2018, JAMA; Hall et al., 2011, Lancet                                                                                                                                                                         |
| 4. Etiologic effect of BMI on cancer outcomes <sup>1</sup>               | Cancer outcome | RRs ranged from 1.05 to 1.50 (Supplementary Table 2)                                                                 | Lognormal    | BMI change and cancer incidence                                                                                                                                                                                                                                    | Continuous Update Project (CUP) conducted by the World Cancer Research Fund (WCRF)/American                                                                                                                                |

1  
2  
3  
4  
5  
6  
7  
8  
9  
10  
11  
12  
13  
14  
15  
16  
17  
18  
19  
20  
21  
22  
23  
24  
25  
26  
27  
28  
29  
30  
31  
32  
33  
34  
35  
36  
37  
38  
39  
40  
41  
42  
43  
44  
45  
46  
47

Institute for Cancer Research (AICR)

5. Cancer statistics<sup>1</sup>

Cancer incidence<sup>3</sup> and survival

Appendixes 2-3, Appendix Tables 2-3 and Supplementary Tables 3-4

$\beta$

Stratified by age, sex, and race/ethnicity

NCI's Surveillance, Epidemiology, and End Results Program (SEER) Database; CDC's National Program of Cancer Registries (NPCR) Database

6. Healthcare related costs<sup>1,2</sup>

Medical expenditures, productivity loss, and patient time costs

Appendix 6, Appendix Table 6 and Supplementary Tables 6-7

$\gamma$

Stratified by age, and sex

NCI's Cancer Prevalence and Cost of Care Projections; Published literature

7. Policy costs<sup>1,2</sup>

For government and industry

Appendix 5 and Appendix Tables 4-5

$\gamma$

Administration and monitoring costs for government; compliance and reformulation costs for industry

FDA's budget report; Nutrition Review Project; and FDA's RIA

8. Health-related quality of life (HRQOL)<sup>1</sup>

For 13 types of cancers

Ranged from 0.64 to 0.86 (Appendix 4 and Supplementary Table 5)

$\beta$

EQ-5D<sup>4</sup> data from published literature by cancer type

Published literature

---

Abbreviations: BMI, Body Mass Index; FDA, Food and Drug Administration; NCI, National Cancer Institute; NHANES, National Health, and Nutrition Examination Survey; UK, United Kingdom.  
1. Uncertainty distributions were incorporated in the probabilistic sensitivity analyses. Uncertainties in each parameter were presented in supplemental materials (Table TS3 and Tables S3-9).  
2. If the source did not provide uncertainty estimates, we assumed the standard errors were 20% of the mean estimate to generate gamma distribution.  
3. Time-varying input parameter, for which the model accounted the secular trends. Details were provided in the Supplements.  
4. EQ-5D is a standardized instrument developed by the EuroQol Group as a measure of health-related quality of life that can be used in a wide range of health conditions and treatments.

## 106 **Simulated US Population**

107 Because FDA's final rules on menu calorie labeling were published in 2016 and implemented in  
108 2018, we used 2015-2016 as the baseline and assumed a closed cohort for this analysis. We  
109 combined the 2013-2016 National Health and Nutrition Examination Survey (NHANES) to  
110 approximate the baseline and simulate the US adult population aged 20+ years in 32 subgroups  
111 stratified by age (20-44, 45-54, 55-64, 65+), sex (men, women), and race/ethnicity (non-Hispanic  
112 White, non-Hispanic Black, Hispanic, Other) (Supplementary Table 1). This closed cohort of US  
113 adults was modeled through their lifetime up to 80 years from baseline or until death.

## 115 **Calorie Consumption from Restaurants**

116 Mean calorie consumption from full-service and fast-food restaurants, demographics, and  
117 prevalence of overweight or obesity were estimated using data collected from participants with at  
118 least one valid 24-hour diet recall, in every 32 strata. Following FDA's estimates,<sup>12</sup> we assumed  
119 that policy would affect 56.5% of calories consumed at full-service restaurants and 100% at fast-  
120 food restaurants. The National Cancer Institute method was used to estimate the usual intake  
121 distribution by statistically adjusting for within vs. between variance in dietary recalls.<sup>24-26</sup> The  
122 complex survey design was incorporated in all statistical analyses to ensure the  
123 representativeness of study findings to the non-institutionalized US adults.

## 125 **Policy Association with Calorie Consumption**

126 Policy association was obtained from a systematic review and meta-analysis of food labeling  
127 interventions that reported a 7.3% (95% CI: 4.4%-10.1%) reduction in calories consumed per  
128 meal following calorie labeling (Appendix 1 and Appendix Table 1).<sup>14</sup> We assumed that the

1  
2  
3 129 policy would have a one-time effect over one year, with no further change over time. Potential  
4  
5 130 policy impact on industry reformulation was derived from studies of restaurant menu items  
6  
7  
8 131 following the passage and initial period of partial implementation of the final rules. Between  
9  
10 132 2012-2014, among 66 of the 100 largest US chain restaurants, replacing higher-calorie menu  
11  
12 133 items with lower-calorie items led to a 1-5% calorie reduction per menu item.<sup>18 19</sup> Among 44  
13  
14 134 chain restaurants with menu calorie information available in 2008, the calories per menu item  
15  
16 135 fell by 7% between 2008 and 2015.<sup>17</sup> Therefore, we chose 5% as the mid-point for the potential  
17  
18 136 policy impact on industry response, which may include discontinuation of existing high-calorie  
19  
20 137 menu items and/or introduction of lower-calorie menu items. For both scenarios, we  
21  
22 138 conservatively assumed that there would be some compensatory increased calorie intake outside  
23  
24 139 of restaurants so that only half of all calories reduced from restaurant meals would translate into  
25  
26 140 long-term reductions in daily calories.  
27  
28  
29  
30  
31  
32

### 33 142 **Calorie Reduction and Obesity-Associated Cancer Risk**

34  
35  
36 143 To estimate the relationships between calorie intake and obesity-associated cancers, we  
37  
38 144 associated the multivariate-adjusted association of change in calorie intake (kcal/day) with  
39  
40 145 change in BMI (kg/m<sup>2</sup>) and the estimates of BMI and cancer risks. Based on an established  
41  
42 146 energy-weight dynamic model that accounted for long-term impacts of calorie reduction on  
43  
44 147 weight and metabolic expenditure, we assumed that each 55 kcal/day calorie reduction leads to 1  
45  
46 148 pound weight loss over one year among overweight or obese adults, with no further reduction  
47  
48 149 thereafter.<sup>27 28</sup> Because long-term observational studies suggest that weight change for an  
49  
50 150 equivalent change in dietary intake is about twice as large in overweight or obese adults than  
51  
52 151 normal-weight adults,<sup>29 30</sup> we conservatively applied half of this estimate to individuals with  
53  
54  
55  
56  
57  
58  
59  
60

1  
2  
3 152 normal weight. For each of 13 obesity-related cancers, the estimated change in risk for each 5  
4  
5 153 kg/m<sup>2</sup> change in BMI was derived from the systematic reviews and meta-analyses of  
6  
7  
8 154 multivariable-adjusted prospective cohort studies conducted by the World Cancer Research  
9  
10 155 Fund/American Institute for Cancer Research Continuous Update Project and the International  
11  
12 156 Agency for Research on Cancer (Supplementary Table 2).<sup>2</sup>  
13  
14  
15 157

### 17 158 **Cancer Incidence, Mortality, and Health-Related Quality of Life**

19  
20 159 Age-adjusted cancer incidences in 2015 were obtained from the National Program of Cancer  
21  
22 160 Registries and the Surveillance, Epidemiology, and End Results (SEER) program. We projected  
23  
24 161 the cancer incidence from 2015 to 2030 based on the 2006-2014 trend using the Average Annual  
25  
26 162 Percent Change method.<sup>31</sup> We then combined the projected incidence rates with the projected US  
27  
28  
29 163 population from the National Interim Projections<sup>32</sup> to account for changes in population age  
30  
31 164 distribution over time. We further applied the cohort-period method to estimate cancer incidence  
32  
33 165 in the closed cohort of US adults in each of 32 groups as they age (Appendix 2, Appendix Table  
34  
35 166 2, and Supplementary Table 3). The 5-year relative survival rates for each cancer were extracted  
36  
37  
38 167 and converted to an annual probability of death (Appendix 3, Appendix Table 3, and  
39  
40 168 Supplementary Table 4).<sup>33-35</sup> Health-related quality of life data were obtained from publications  
41  
42 169 that reported EuroQol-5 Dimension utility weights for each cancer among US patient population  
43  
44  
45 170 (Appendix 4 and Supplementary Table 5).  
46  
47  
48 171

### 50 172 **Policy and Health-Related Costs**

52 173 Policy costs included government costs to administer, monitor, and evaluate the policy and  
53  
54  
55 174 industry costs to comply with the policy and reformulate their products (in scenario 2).  
56  
57  
58  
59  
60

1  
2  
3 175 Government costs were estimated from FDA's budget report and Nutrition Review Project  
4  
5 176 (Appendix 5 and Appendix Tables 4-5).<sup>36 37</sup> Industry compliance and reformulation costs were  
6  
7 177 based on the FDA's regulatory impact analysis that included initial and recurring nutrition  
8  
9 178 analysis of standard menu items and menu replacement, provision of nutrition information,  
10  
11 179 employee training, and legal review and accounted for restaurant size and type, reformulation  
12  
13 180 type, and compliance period.<sup>12</sup>  
14  
15  
16  
17  
18

19 182 Direct medical costs for cancer care were extracted from the SEER-Medicare linked database for  
20  
21 183 three phases of cancer care: initial, continuing, and end-of-life (Appendix 6, Appendix Table 6,  
22  
23 184 and Supplementary Tables 6-7).<sup>31 38</sup> For individuals without cancer, the direct medical costs were  
24  
25 185 estimated based on Medical Expenditure Panel Survey (MEPS) data and insurance claims.<sup>23 39 40</sup>  
26  
27 186 Indirect costs including productivity loss due to disability or missed workdays and patient time  
28  
29 187 costs were derived from publications using MEPS data.<sup>41-44</sup>  
30  
31  
32

33  
34  
35

### 36 189 **Cost-Effectiveness Analysis**

37  
38 190 Following the guidelines on cost-effectiveness in health and medicine,<sup>45</sup> we evaluated the policy  
39  
40 191 impact by projecting the numbers of new cancer cases and cancer deaths averted and quality-  
41  
42 192 adjusted life-years (QALYs) gained and cost-effectiveness from both healthcare and societal  
43  
44 193 perspectives. The healthcare perspective assessed net costs as the difference between government  
45  
46 194 costs for implementing the policy and the direct medical costs of cancer care. The societal  
47  
48 195 perspective assessed the net costs as the difference between total policy costs (including both  
49  
50 196 government and industry costs) and health-related costs saved (including direct and indirect costs  
51  
52 197 of cancer care). All costs were inflated to 2015 US dollars using the Consumer Price Index or  
53  
54  
55  
56  
57  
58  
59

1  
2  
3 198 Personal Health Care Index, with all costs and QALYs discounted at 3% annually.<sup>45</sup> Incremental  
4  
5 199 cost-effectiveness ratios (ICERs) were calculated as net costs divided by the difference in  
6  
7 200 QALYs between policy vs. no policy. ICERs falling below a willingness-to-pay threshold of  
8  
9 201 \$150,000 per QALY gained were considered to be cost-effective.<sup>46 47</sup> Cost-effectiveness analysis  
10  
11 202 was further conducted among population subgroups by age, sex, and race/ethnicity to evaluate  
12  
13 203 policy associations with health disparities.  
14  
15  
16  
17 204

18  
19  
20 205 One-way sensitivity analyses were performed by varying input parameters, including reducing  
21  
22 206 the outside-the-restaurant calorie compensation level to 25% or increasing it to 75%, altering  
23  
24 207 coverage of the FDA's final rule to all calories from full-service restaurants, reducing the diet-  
25  
26 208 BMI associations to half or doubling the estimates, incorporating an estimated 2% annual  
27  
28 209 increase in medical expenditures associated with cancer care, and altering annual discounting  
29  
30 210 rates from 3% to 0% or 5%. We also evaluated impacts at a 10-year time horizon for  
31  
32 211 stakeholders interested in shorter-term health gains and economic benefits. Probabilistic  
33  
34 212 sensitivity analyses (PSAs) were conducted to incorporate uncertainty in all input parameters  
35  
36 213 jointly (**Table 1**). A total of 1000 Monte Carlo simulations were performed, and 95% uncertainty  
37  
38 214 intervals (UIs) were estimated based on the 2.5 and 97.5 percentiles of 1,000 simulations. All  
39  
40 215 analyses were conducted using SAS (Version 9.4) and R (Version 3.3.1).  
41  
42  
43  
44  
45  
46  
47

## 48 217 **Patient and Public Involvement**

49  
50 218 This study used de-identified datasets and did not involve patients or the public in the design, or  
51  
52 219 conduct, or reporting, or dissemination plans of our research.  
53  
54  
55  
56  
57  
58  
59  
60



## 220 RESULTS

### 221 Population Characteristics

222 The simulated cohort of US adults in 2015-2016 had a mean age of 47.8 years, with 65.0% being  
223 non-Hispanic white adults and 71.4% were overweight or obese (Supplementary Tables 8-9). A  
224 mean of 332 daily calories was consumed from full-service or fast-food restaurants. Higher  
225 levels were consumed among younger adults aged 20-44 years (425 kcal/day), men (388  
226 kcal/day), non-Hispanic black (361 kcal/day), and Hispanic (367 kcal/day) adults, in comparison  
227 to other corresponding subgroups.

### 229 Health Gains

230 The menu calorie labeling was estimated to reduce calories consumed from restaurants by a  
231 mean of 24 kcal/day (7.2% of calories consumed from restaurants) among US adults, and total  
232 daily calories by 12 kcal/day. Accounting for potential industry reformulation would reduce the  
233 mean intake by an additional 16 kcal/day, and total daily calories by 8 kcal/day.

234  
235 Based on changes in consumer behavior alone, the policy was associated with a reduction of  
236 28,000 (95% UI: 16,300-39,100) new cancer cases and 16,700 (9,610-23,600) cancer deaths, and  
237 a gain of 111,000 (64,800-158,000) QALYs among 235 million US adults over a median follow-  
238 up of 34.4 years (**Table 2 and Figure 1**). By cancer type, the greatest numbers of new cancer  
239 cases averted were cancers of endometrial (N [95% UI]: 5,700 [2,380-9,190]), liver (5,180  
240 [2,800-7,730]), kidney (5,090 [2,670-7,730]), post-menopausal breast (4,840 [2,010-8,230]), and  
241 pancreas (1,400 [756-2,100]). The greatest numbers of prevented cancer deaths were estimated  
242 for cancers of liver (4,530 [2,410-6,760]), post-menopausal breast (3,080 [861-5,650]),

1  
2  
3 243 endometrial (2,060 [957-3,220]), kidney (1,980 [1,080-2,920]), and pancreas (1,230 [661-  
4  
5 244 1,830]).

6  
7 245  
8  
9  
10 246 Based on additional industry response, the total estimated health gains approximately doubled,  
11  
12 247 preventing 47,300 (35,400-59,100) new cancer cases and 28,200 (21,100-35,300) cancer deaths,  
13  
14 248 and gaining 189,000 (140,000-236,000) QALYs, with similar rankings of the types of new  
15  
16  
17 249 cancer cases and cancer deaths prevented.  
18  
19  
20  
21  
22  
23  
24  
25  
26  
27  
28  
29  
30  
31  
32  
33  
34  
35  
36  
37  
38  
39  
40  
41  
42  
43  
44  
45  
46  
47  
48  
49  
50  
51  
52  
53  
54  
55  
56  
57  
58  
59  
60

**Table 2. Estimated health gains and costs of the federal menu calorie labeling on reducing the obesity-related cancer burdens in the US over 10 years and a lifetime (US population=235,162,844)<sup>1</sup>**

|                                             | Menu Calorie Labeling Policy                |                                                                    |                                             |                                                                    |
|---------------------------------------------|---------------------------------------------|--------------------------------------------------------------------|---------------------------------------------|--------------------------------------------------------------------|
|                                             | 10 Years                                    |                                                                    | Lifetime                                    |                                                                    |
|                                             | Consumer Behavior<br>Median (2.5% to 97.5%) | Consumer Behavior +<br>Industry Response<br>Median (2.5% to 97.5%) | Consumer Behavior<br>Median (2.5% to 97.5%) | Consumer Behavior +<br>Industry Response<br>Median (2.5% to 97.5%) |
| <b>New Cancer Cases Averted, N (95% UI)</b> |                                             |                                                                    |                                             |                                                                    |
| Endometrial cancer                          | 692 (276 to 1100)                           | 1130 (716 to 1550)                                                 | 5700 (2380 to 9190)                         | 9920 (6630 to 13600)                                               |
| Liver cancer                                | 366 (144 to 615)                            | 626 (386 to 887)                                                   | 5180 (2800 to 7730)                         | 8550 (5960 to 11300)                                               |
| Kidney cancer                               | 584 (290 to 884)                            | 980 (689 to 1280)                                                  | 5090 (2670 to 7470)                         | 8620 (6200 to 11000)                                               |
| Breast cancer (postmenopausal)              | 670 (256 to 1110)                           | 1080 (658 to 1520)                                                 | 4840 (2010 to 8230)                         | 8520 (5610 to 12200)                                               |
| Pancreatic cancer                           | 170 (83 to 257)                             | 273 (183 to 367)                                                   | 1400 (756 to 2100)                          | 2380 (1690 to 3140)                                                |
| Esophageal adenocarcinoma                   | 179 (56 to 304)                             | 286 (159 to 411)                                                   | 1350 (485 to 2230)                          | 2330 (1440 to 3280)                                                |
| Colorectal cancer                           | 189 (97 to 284)                             | 319 (225 to 418)                                                   | 1050 (561 to 1600)                          | 1780 (1230 to 2370)                                                |
| Multiple myeloma                            | 75 (37 to 117)                              | 122 (81 to 169)                                                    | 690 (384 to 1090)                           | 1150 (775 to 1630)                                                 |
| Stomach cancer (cardia)                     | 54 (6 to 109)                               | 98 (51 to 165)                                                     | 647 (261 to 1140)                           | 1090 (644 to 1660)                                                 |
| Thyroid cancer                              | 105 (58 to 161)                             | 176 (123 to 243)                                                   | 516 (206 to 914)                            | 951 (576 to 1420)                                                  |
| Advanced prostate cancer                    | 66 (17 to 118)                              | 107 (57 to 162)                                                    | 339 (138 to 561)                            | 577 (352 to 836)                                                   |
| Gallbladder cancer                          | 29 (16 to 42)                               | 46 (34 to 60)                                                      | 314 (213 to 438)                            | 512 (399 to 648)                                                   |
| Ovarian cancer                              | 33 (15 to 56)                               | 53 (33 to 78)                                                      | 147 (44 to 282)                             | 254 (110 to 420)                                                   |
| Total                                       | 3300 (1750 to 4720)                         | 5230 (3870 to 6790)                                                | 28000 (16300 to 39100)                      | 47300 (35400 to 59100)                                             |
| <b>Cancer Deaths Prevented, N (95% UI)</b>  |                                             |                                                                    |                                             |                                                                    |
| Liver cancer                                | 168 (59 to 287)                             | 287 (174 to 410)                                                   | 4530 (2410 to 6760)                         | 7510 (5200 to 9980)                                                |
| Breast cancer (postmenopausal)              | 68 (33 to 106)                              | 111 (74 to 149)                                                    | 3080 (862 to 5650)                          | 5590 (3230 to 8310)                                                |
| Endometrial cancer                          | 52 (20 to 86)                               | 87 (55 to 121)                                                     | 2060 (957 to 3220)                          | 3520 (2390 to 4700)                                                |
| Kidney cancer                               | 70 (29 to 110)                              | 114 (74 to 154)                                                    | 1980 (1080 to 2920)                         | 3320 (2430 to 4300)                                                |
| Pancreatic cancer                           | 88 (38 to 138)                              | 143 (93 to 195)                                                    | 1230 (661 to 1830)                          | 2080 (1480 to 2740)                                                |
| Esophageal adenocarcinoma                   | 76 (21 to 131)                              | 122 (69 to 178)                                                    | 1150 (403 to 1930)                          | 1990 (1210 to 2820)                                                |
| Colorectal cancer                           | 34 (17 to 53)                               | 57 (40 to 77)                                                      | 706 (369 to 1080)                           | 1200 (839 to 1600)                                                 |
| Stomach cancer (cardia)                     | 22 (2 to 48)                                | 40 (19 to 68)                                                      | 541 (230 to 947)                            | 907 (538 to 1400)                                                  |
| Multiple myeloma                            | 18 (8 to 30)                                | 29 (18 to 42)                                                      | 420 (239 to 662)                            | 691 (481 to 980)                                                   |
| Gallbladder cancer                          | 13 (7 to 20)                                | 21 (15 to 28)                                                      | 267 (181 to 369)                            | 436 (341 to 551)                                                   |
| Advanced prostate cancer                    | 9 (3 to 15)                                 | 13 (7 to 19)                                                       | 163 (65 to 280)                             | 273 (163 to 404)                                                   |
| Ovarian cancer                              | 8 (3 to 15)                                 | 13 (7 to 20)                                                       | 107 (39 to 191)                             | 181 (94 to 290)                                                    |
| Thyroid cancer                              | 1 (1 to 2)                                  | 2 (1 to 3)                                                         | 23 (11 to 38)                               | 38 (24 to 58)                                                      |
| Total                                       | 654 (320 to 970)                            | 1080 (746 to 1400)                                                 | 16700 (9610 to 23600)                       | 28200 (21100 to 35300)                                             |
| <b>Life Years Gained</b>                    | 678 (288 to 1040)                           | 1120 (738 to 1490)                                                 | 76400 (43400 to 109000)                     | 130000 (96900 to 162000)                                           |
| <b>QALYs Gained</b>                         | 4280 (2170 to 6250)                         | 7030 (4960 to 9090)                                                | 111000 (64800 to 158000)                    | 189000 (140000 to 236000)                                          |

|    |                                                                                   |                         |                        |                       |
|----|-----------------------------------------------------------------------------------|-------------------------|------------------------|-----------------------|
| 1  |                                                                                   |                         |                        |                       |
| 2  |                                                                                   |                         |                        |                       |
| 3  | <b>Changes in Health-Related Costs, Cancer Only</b> (\$, millions) <sup>2,3</sup> |                         |                        |                       |
| 4  | Healthcare (medical) cost                                                         | -192 (-277 to -100)     | -319 (-403 to -227)    | -1480 (-2080 to -884) |
| 5  | Patient time cost                                                                 | -7.33 (-10.9 to -3.56)  | -12.2 (-15.8 to -8.39) | -102 (-144 to -62.2)  |
| 6  | Productivity loss                                                                 | -48.7 (-70.1 to -24.5)  | -80.4 (-102 to -56.7)  | -608 (-865 to -363)   |
| 7  | <b>Policy Implementation Costs</b> (\$, millions) <sup>2,3</sup>                  |                         |                        |                       |
| 8  | Government cost                                                                   | 13.2 (11.4 to 15.9)     | 13.1 (11.4 to 15.7)    | 18.5 (14.5 to 25.1)   |
| 9  | Administration                                                                    | 9.08 (8.59 to 9.60)     | 9.07 (8.64 to 9.50)    | 9.07 (8.61 to 9.56)   |
| 10 | Monitoring                                                                        | 4.09 (2.40 to 6.74)     | 4.00 (2.35 to 6.63)    | 9.40 (5.45 to 16.1)   |
| 11 | Industry cost                                                                     | 505 (480 to 535)        | 631 (599 to 667)       | 820 (762 to 889)      |
| 12 | Compliance                                                                        | 505 (480 to 535)        | 506 (480 to 533)       | 820 (762 to 889)      |
| 13 | Reformulation                                                                     | -----                   | 124 (107 to 146)       | -----                 |
| 14 | <b>Net Costs, Cancer Only</b> (\$, millions) <sup>2,3,4</sup>                     |                         |                        |                       |
| 15 | Societal perspective                                                              | 270 (156 to 389)        | 233 (119 to 356)       | -1350 (-2260 to -486) |
| 16 | Healthcare perspective                                                            | -179 (-263 to -86.3)    | -305 (-390 to -214)    | -1460 (-2060 to -864) |
| 17 | <b>ICER</b> (dollars/QALY) <sup>5</sup>                                           |                         |                        |                       |
| 18 | Societal perspective                                                              | 64500 (26100 to 187000) | 33600 (13300 to 72400) | Dominant              |
| 19 | Healthcare perspective                                                            | Dominant                | Dominant               | Dominant              |

Abbreviations: ICER, Incremental Cost-Effectiveness Ratio; QALY, quality-adjusted life years.

1. Values are the median estimates (95% uncertainty intervals) of each distribution of 1000 simulations.

2. Health-related costs were inflated to 2015 US dollars using the Personal Health Care (PHC) index. Policy intervention costs were inflated to 2015 US dollars using the Consumer Price Index. Negative costs represent savings.

3. Costs are medians from 1000 simulations so may not add up to totals.

4. Net costs were calculated as policy costs minus health-related costs from reduced cancer burden. The societal perspective includes healthcare costs, patient time costs, productivity costs, and policy implementation costs; the government perspective included policy costs relevant to policy implementation and program monitoring and evaluation, and medical costs.

5. ICER threshold was evaluated at \$150,000/QALY. Dominant represents less costly and more effective than the "no-policy intervention" scenario.

## 250 **Economic Impacts**

251 Implementing the policy would cost the government \$19 (95% UI: \$15-25) million and the  
252 restaurant industry, \$820 (\$762-889) million in compliance costs over a lifetime (**Table 2**). The  
253 policy was associated with savings of \$1480 (\$884-2080) million in direct medical costs, \$608  
254 (\$363-865) million in productivity loss costs, and \$102 (\$62-144) million in patient time costs.  
255 Potential industry reformulation would cost the restaurant industry an additional \$296 (\$249-  
256 353) million to implement but would also result in greater healthcare savings, including \$2,500  
257 (\$1,900-3,090) million, \$1,030 (\$780-1,290) million and \$172 (\$131-216) million in reduced  
258 direct medical, productivity loss, and patient time costs, respectively.

260 From both the healthcare and social perspectives, implementing the menu calorie labeling policy  
261 among US adults over a lifetime would be cost-saving. With changes in consumer behavior  
262 alone, the net cost savings were estimated to be \$1,460 (\$864-2,060) million and \$2,480 (\$1,880-  
263 3,070) million from the healthcare and societal perspective, respectively. With additional  
264 industry response, estimated cost savings increased to \$1,350 (\$486-2,260) million from the  
265 healthcare perspective and \$2,570 (\$1,650-3,460) million from the societal perspective.

## 267 **Policy Impacts Among Population Subgroups**

268 Among population subgroups, the consumer response to the policy was estimated to result in  
269 greater health gains per 100,000 individuals among adults aged 20-44 years (15 new cancer cases  
270 averted) and 55-64 years (16 new cancer cases averted) than older age groups (aged 65+ years; 6  
271 new cancer cases averted); Hispanic and non-Hispanic Black individuals than Non-Hispanic  
272 White group (22 vs. 9 and 17 vs. 9 new cancer cases averted) (**Table 3**). The numbers of cancer

1  
2  
3 273 deaths averted, life-years and QALYs gained, health-related costs saved, and net costs among  
4  
5 274 population subgroups followed a similar pattern (Supplementary Tables 10-11 and  
6  
7 275 Supplementary Figures 2-5). For instance, the policy was associated with more cancer deaths  
8  
9 276 prevented per 100,000 individuals among younger adults aged 20-44 years than older adults aged  
10  
11 277 65+ years (10 vs. 3 cancer deaths averted) and Hispanic and non-Hispanic Black adults than non-  
12  
13 278 Hispanic White individuals (14 vs. 5 and 11 vs. 5 cancer deaths averted). Adding potential  
14  
15 279 industry reformulations resulted in larger health gains among adults aged 45-54 (128% increase  
16  
17 280 in new cancer cases averted) and non-Hispanic White adults (84% increase in new cancer cases  
18  
19 281 averted).  
20  
21  
22  
23  
24  
25  
26  
27  
28  
29  
30  
31  
32  
33  
34  
35  
36  
37  
38  
39  
40  
41  
42  
43  
44  
45  
46  
47  
48  
49  
50  
51  
52  
53  
54  
55  
56  
57  
58  
59  
60

**Table 3. Estimated new cancer cases and deaths prevented by the federal menu calorie labeling policy in the US by age, sex, and race/ethnicity, over a lifetime<sup>1</sup>**

|                                 | Consumer Behavior     |                                  | Consumer Behavior + Industry Response |                                  |
|---------------------------------|-----------------------|----------------------------------|---------------------------------------|----------------------------------|
|                                 | N (95% UI)            | Per 100,000 individuals (95% UI) | N (95% UI)                            | Per 100,000 individuals (95% UI) |
| <b>New Cancer Cases Averted</b> |                       |                                  |                                       |                                  |
| Age                             |                       |                                  |                                       |                                  |
| 20-44                           | 15700 (6170 to 25100) | 15.0 (5.89 to 24.0)              | 28000 (18000 to 37500)                | 26.7 (17.2 to 35.8)              |
| 45-54                           | 2810 (-2110 to 8030)  | 6.61 (-4.97 to 18.9)             | 6420 (1390 to 11600)                  | 15.1 (3.27 to 27.2)              |
| 55-64                           | 6330 (3540 to 9400)   | 15.7 (8.76 to 23.3)              | 8640 (5790 to 11800)                  | 21.4 (14.3 to 29.1)              |
| ≥65                             | 2740 (795 to 4650)    | 5.77 (1.68 to 9.80)              | 4060 (2070 to 5950)                   | 8.55 (4.36 to 12.6)              |
| Sex                             |                       |                                  |                                       |                                  |
| Female                          | 15100 (6650 to 24000) | 12.5 (5.51 to 19.8)              | 25900 (17400 to 34900)                | 21.4 (14.4 to 28.9)              |
| Male                            | 12500 (4920 to 20100) | 10.9 (4.30 to 17.6)              | 21100 (13500 to 29100)                | 18.4 (11.8 to 25.4)              |
| Race/Ethnicity                  |                       |                                  |                                       |                                  |
| Non-Hispanic White              | 14300 (4310 to 24500) | 9.16 (2.77 to 15.7)              | 26300 (16000 to 36700)                | 16.9 (10.3 to 23.6)              |
| Non-Hispanic Black              | 4720 (1820 to 8100)   | 16.6 (6.37 to 28.4)              | 7630 (4750 to 11100)                  | 26.8 (16.7 to 38.9)              |
| Hispanic                        | 7700 (3560 to 11500)  | 21.5 (9.93 to 32.2)              | 11200 (7060 to 15300)                 | 31.3 (19.7 to 42.6)              |
| Other                           | 1150 (-240 to 2440)   | 7.60 (-1.59 to 16.2)             | 1990 (652 to 3310)                    | 13.2 (4.33 to 22.0)              |
| <b>Cancer Deaths Prevented</b>  |                       |                                  |                                       |                                  |
| Age                             |                       |                                  |                                       |                                  |
| 20-44                           | 10200 (4170 to 16400) | 9.73 (3.98 to 15.7)              | 18100 (11700 to 24500)                | 17.3 (11.2 to 23.4)              |
| 45-54                           | 1730 (-853 to 4240)   | 4.07 (-2.01 to 9.97)             | 3650 (1040 to 6240)                   | 8.58 (2.44 to 14.7)              |
| 55-64                           | 3320 (1760 to 4930)   | 8.21 (4.36 to 12.2)              | 4480 (2890 to 6090)                   | 11.1 (7.15 to 15.1)              |
| ≥65                             | 1200 (285 to 2130)    | 2.53 (0.60 to 4.48)              | 1800 (848 to 2720)                    | 3.79 (1.79 to 5.73)              |
| Sex                             |                       |                                  |                                       |                                  |
| Female                          | 7810 (3290 to 12600)  | 6.47 (2.73 to 10.5)              | 13400 (8850 to 18500)                 | 11.1 (7.33 to 15.3)              |
| Male                            | 8510 (3500 to 13900)  | 7.44 (3.06 to 12.1)              | 14400 (9300 to 20000)                 | 12.6 (8.13 to 17.5)              |
| Race/Ethnicity                  |                       |                                  |                                       |                                  |
| Non-Hispanic White              | 7920 (2180 to 13900)  | 5.08 (1.40 to 8.94)              | 14700 (8770 to 20900)                 | 9.45 (5.64 to 13.5)              |
| Non-Hispanic Black              | 3010 (1000 to 5370)   | 10.6 (3.51 to 18.8)              | 4990 (2950 to 7380)                   | 17.5 (10.4 to 25.9)              |
| Hispanic                        | 4960 (2360 to 7560)   | 13.8 (6.58 to 21.1)              | 7190 (4480 to 9870)                   | 20.0 (12.5 to 27.5)              |
| Other                           | 565 (-246 to 1350)    | 3.75 (-1.63 to 8.97)             | 1070 (273 to 1870)                    | 7.12 (1.81 to 12.4)              |

1. Values are the median estimates (95% uncertainty intervals) of each distribution of 1000 simulations.

## 282 **Sensitivity Analyses**

283 In PSA, based on consumer responses alone, the menu calorie labeling was cost-saving over a  
284 lifetime in 93% of 1000 simulations and cost-effective (<\$150,000/QALY) in the remaining 7%  
285 from the societal perspective, and was cost-saving in over 98% of 1000 simulations from the  
286 healthcare perspective. Adding the additional industry response increased the probability of cost-  
287 savings to nearly 100% of the simulations for both the societal and healthcare perspectives  
288 **(Figure 2).**

289  
290 Evaluating health gains, costs, and cost-effectiveness at 10 years, the policy remained cost-  
291 saving from the healthcare perspective and was cost-effective from the societal perspective, with  
292 an ICER of \$64,500 (26,100-187,000) per QALY based on consumer response alone and  
293 \$33,600 (13,300-72,400) per QALY with additional industry response. The cost-effectiveness of  
294 this policy was most sensitive to varied assumptions of the diet-BMI estimates and annual  
295 discounting rates (Supplementary Tables 12-13 and Supplementary Figure 6).

## 297 **DISCUSSION**

298 This study estimated that the federal menu calorie labeling policy, based on consumer response  
299 alone, was associated with a reduction of approximately 28,000 new cancer cases and 16,700  
300 cancer deaths among US adults over a lifetime, and net savings of \$1,350 and \$1,460 million  
301 from societal and healthcare perspectives, respectively. Incorporating additional modest industry  
302 responses, these health and economic gains were approximately doubled. Greater health gains  
303 were expected among younger, middle-aged subgroups, Hispanic, and non-Hispanic Black



1  
2  
3 304 individuals compared with other subgroups. Findings were robust to a range of probabilistic and  
4  
5 305 one-way sensitivity analyses.  
6  
7  
8 306

9  
10 307 Our study findings supported that nutrition policies can have meaningful health and economic  
11  
12 308 impacts on cancer prevention in the US. In this case, a modest change in mean calorie  
13  
14 309 consumption, distributed across the population, was estimated to achieve important reductions in  
15  
16 310 obesity-related cancer burdens among US adults. Using the best available estimates, our study  
17  
18 311 further suggested that the federal menu calorie labeling policy is cost-effective in the short term  
19  
20 312 and cost-saving in the long term in reducing obesity-associated cancer burdens. Many preventive  
21  
22 313 medical screenings are cost-effective, but none of them achieve net savings. For example, among  
23  
24 314 a large cohort of women born in the 1960s over a lifetime, mammography screening starting at  
25  
26 315 age 45 years was estimated to have an ICER of \$40 135/QALY.<sup>48</sup> Colonoscopy screening  
27  
28 316 starting at age 45 years among U.S. adults achieved an ICER of \$33 900/QALY.<sup>49</sup> Prostate-  
29  
30 317 specific antigen screening had an ICER of \$70 831 to \$136 332/QALY among U.S. males  
31  
32 318 beginning at 40 years of age over a lifetime.<sup>50</sup> In contrast, population-based nutrition  
33  
34 319 interventions could be a cost-saving strategy for cancer prevention. Thus, while we shall  
35  
36 320 continue the efforts of increasing the screening rates, we also need to consider population-based  
37  
38 321 strategies to improve nutrition for cancer prevention in the US.  
39  
40  
41  
42  
43  
44  
45 322

46  
47 323 Our findings also indicated the importance of assessing potential industry response, which could  
48  
49 324 nearly double health and economic benefits. The additional impacts of industry reformulation in  
50  
51 325 response to nutrition-related policies have been reported in other studies focused on obesity-  
52  
53 326 associated cancer, diabetes, and cardiovascular diseases.<sup>21 51-53</sup> Our new findings build on this  
54  
55  
56  
57  
58  
59  
60

1  
2  
3 327 recent work and highlight the importance of potential strategies to encourage industry  
4  
5 328 reformulation under the federal menu calorie labeling framework to further improve the health  
6  
7  
8 329 benefits and cost-effectiveness of such policies.  
9

10 330  
11  
12 331 In addition, our results showed that population-based nutrition policies such as menu calorie  
13  
14 332 labeling can potentially narrow diet-associated cancer disparities. We found greater health gains  
15  
16 333 and economic impacts among racial/ethnic minorities compared to non-Hispanic whites, likely  
17  
18 334 due to higher diet-associated cancer burdens among minorities.<sup>54</sup> However, labeling policies may  
19  
20 335 have fewer effects on food purchasing behaviors among minorities or socioeconomically  
21  
22 336 disadvantaged groups. Prior studies reported that individuals with higher education and income  
23  
24 337 attainment were more likely to notice and use the menu calorie labels when ordering foods in  
25  
26 338 fast-food or full-service restaurants compared to socioeconomically disadvantaged groups,<sup>55-57</sup>  
27  
28 339 and multi-racial individuals were less likely to notice and use menu calorie labels in fast food  
29  
30 340 restaurants than non-Hispanic whites.<sup>55</sup> Previous studies also showed that literacy or numeracy  
31  
32 341 could be a barrier to label use.<sup>58 59</sup> Thus, it is important for labeling policies to be paired with  
33  
34 342 nutrition education to effectively reduce diet-associated health disparities.  
35  
36  
37  
38  
39

40 343  
41  
42 344 Potential limitations should be considered. First, as a modeling study, our investigation does not  
43  
44 345 provide the impact of real-world policy implementation on the health and economic outcomes of  
45  
46 346 federal menu calorie labeling. However, conducting randomized controlled trials of national  
47  
48 347 nutrition policy interventions is extremely difficult and often implausible while simulation  
49  
50 348 modeling can provide complementary evidence with the flexibility to assess different policy  
51  
52 349 scenarios that help inform policymaking. Second, this evaluation did not include the potential  
53  
54  
55  
56  
57  
58  
59

1  
2  
3 350 benefits of menu calorie labeling on other health outcomes such as diabetes and cardiovascular  
4  
5 351 diseases. Considering such outcomes is likely to be associated with greater health gains and cost  
6  
7 352 savings.<sup>21 60 61</sup> Third, menu calorie labeling could have a greater effect among subgroups with  
8  
9 353 higher levels of income and education and non-Hispanic white adults<sup>55-57</sup> and thus exacerbating  
10  
11 354 health disparities. Due to the lack of consistent policy effect sizes among populations with  
12  
13 355 different socioeconomic statuses, we were unable to integrate this into our modeling. Forth, we  
14  
15 356 only modeled the impact of menu calorie labeling on calories although the policy may also result  
16  
17 357 in potential changes in the nutritional quality of the restaurant meals. The majority of current  
18  
19 358 restaurant meals consumed by American adults – 70% of meals consumed from fast-food  
20  
21 359 restaurants and 50% consumed from full-service restaurants – are of poor nutritional quality, and  
22  
23 360 the remainder is only of intermediate nutritional quality, with very few being ideal.<sup>9</sup> If the policy  
24  
25 361 also improves the quality of restaurant meals, the total reduction in obesity-associated cancer  
26  
27 362 burdens could be greater than our current estimates.  
28  
29  
30  
31  
32

33 363

## 34 364 **CONCLUSIONS**

35 365 Study findings suggest that menu calorie labeling is associated with lower obesity-related cancer  
36  
37 366 rates and reduced costs. Policymakers may prioritize nutrition policies for cancer prevention in  
38  
39 367 the US.  
40  
41  
42  
43  
44  
45  
46  
47  
48  
49  
50  
51  
52  
53  
54  
55  
56  
57  
58  
59  
60

## SUMMARY BOXES

### What is already known on this topic

- Obesity-associated cancer burdens are rising in the US and restaurant meals often contain high levels of calories, increasing the risk of obesity.
- The federal menu calorie labeling policy may reduce obesity-associated cancer rates by helping consumers identify lower-calorie choices and spurring restaurant reformulations.
- The potential health and economic impact of this policy on reducing the obesity-related cancer burden in the US and cancer disparity among demographic populations remain unknown.

### What this study adds

- Our novel findings suggest that the federal menu calorie labeling policy would prevent meaningful numbers of obesity-related cancers and produce net cost savings in the US; Greater health gains and net savings were observed among young adults and racial/ethnic minorities.
- Our results suggest the need to consider and prioritize nutrition-related policy interventions as cost-effective or cost-saving strategies for cancer prevention; government and advocacy strategies to ensure and encourage industry reformulations should be prioritized.

1  
2  
3 **Ethics approval:** This study used de-identified datasets and was exempt from institutional  
4 review board review.  
5

6  
7 **Data sharing:** Data described in the manuscript, codebook, and analytic code will be made  
8 available upon request.  
9

10  
11 **Transparency Statement:** The author affirms that this manuscript is an honest, accurate, and  
12 transparent account of the study being reported; that no important aspects of the study have been  
13 omitted; and that any discrepancies from the study as planned have been explained.  
14

15  
16 **Dissemination Declaration:** Dissemination to the simulated population is not applicable.  
17

18  
19 **Contributors:** MD contributed to the data curation, formal analysis, visualization, original draft  
20 preparation, review and editing; CFG contributed to the data curation, review and editing; FFC,  
21 HE and DDK contributed to software; JBW, PW, DDK, DSM, YCW, and DM contributed to the  
22 review and editing; FFZ contributed the conceptualization, methodology, review and editing,  
23 supervision, and funding acquisition. All authors approved the final version. FFZ acts as the  
24 guarantor of the study.  
25

26  
27 **Role of the funding source:** This study was supported by NIH/NIMHD 1R01MD011501. The  
28 funding sources had no role in the design or conduct of the study; collection, management,  
29 analysis, or interpretation of the data; preparation, review, or approval of the manuscript; or  
30 decision to submit the manuscript for publication.  
31

32  
33 **Competing interests:** All authors have completed the ICMJE uniform disclosure form at  
34 [www.icmje.org/coi\\_disclosure.pdf](http://www.icmje.org/coi_disclosure.pdf) and declare: no support from any organization for the  
35 submitted work. JBW reports leadership or fiduciary role in the US Preventive Services Task  
36 Force. DK reports research funding from the National Institutes of Health, Arnold Ventures,  
37 Pharmaceutical Research and Manufacturers of America, Sarepta Therapeutics, and Janssen  
38  
39  
40  
41  
42  
43  
44  
45  
46  
47  
48  
49  
50  
51  
52  
53  
54  
55  
56  
57  
58  
59  
60

1  
2  
3 Therapeutics; consulting fees from Panalgo and the American College of Physicians. DM reports  
4  
5 research funding from the National Institutes of Health, Gates Foundation, Rockefeller  
6  
7 Foundation, and Vail Institute for Global Research; consulting fees from Acasti Pharma, Barilla,  
8  
9 Danone, and Motif FoodWorks; participating on scientific advisory boards of start-up companies  
10  
11 focused on innovations for health including Beren Therapeutics Brightseed, Calibrate, DayTwo,  
12  
13 Elysium Health, Filtricine, Foodome, HumanCo, January Inc., Perfect Day, Season, and Tiny  
14  
15 Organics; and chapter royalties from UpToDate. All of the above is outside the submitted work.  
16  
17  
18  
19 No other relationships or activities could appear to have influenced the submitted work.  
20  
21  
22  
23  
24  
25  
26  
27  
28  
29  
30  
31  
32  
33  
34  
35  
36  
37  
38  
39  
40  
41  
42  
43  
44  
45  
46  
47  
48  
49  
50  
51  
52  
53  
54  
55  
56  
57  
58  
59  
60

## REFERENCES

1. Lauby-Secretan B, Scoccianti C, Loomis D, et al. Body Fatness and Cancer--Viewpoint of the IARC Working Group. *The New England journal of medicine* 2016;375(8):794-8. doi: 10.1056/NEJMSr1606602 [published Online First: 2016/08/25]
2. World Cancer Research Fund/American Institute for Cancer Research. Continuous Update Project Expert Report 2018. Body fatness and weight gain and the risk of cancer, 2018.
3. Steele CB, Thomas CC, Henley SJ, et al. Vital Signs: Trends in Incidence of Cancers Associated with Overweight and Obesity - United States, 2005-2014. *MMWR Morbidity and mortality weekly report* 2017;66(39):1052-58. doi: 10.15585/mmwr.mm6639e1 [published Online First: 2017/10/06]
4. Fryar CD, Carroll MD, Ogden CL. Prevalence of overweight, obesity, and severe obesity among children and adolescents aged 2–19 years: United States, 1963–1965 through 2015–2016. 2018
5. Hales CM, Fryar CD, Carroll MD, et al. Trends in obesity and severe obesity prevalence in US youth and adults by sex and age, 2007-2008 to 2015-2016. *Jama* 2018;319(16):1723-25.
6. Centers for Disease Control and Prevention NcfcDPaHP. Health and Economic Cost of Chronic Diseases 2019 [Available from: <https://www.cdc.gov/chronicdisease/about/costs/index.htm> accessed January 26 2020.
7. Koroukian SM, Dong W, Berger NA. Changes in Age Distribution of Obesity-Associated Cancers. *JAMA Netw Open* 2019;2(8):e199261. doi: 10.1001/jamanetworkopen.2019.9261 [published Online First: 2019/08/15]
8. Rock CL, Thomson C, Gansler T, et al. American Cancer Society guideline for diet and physical activity for cancer prevention. *CA Cancer J Clin* 2020;70(4):245-71. doi: 10.3322/caac.21591 [published Online First: 2020/06/10]
9. Liu J, Rehm CD, Micha R, et al. Quality of Meals Consumed by US Adults at Full-Service and Fast-Food Restaurants, 2003-2016: Persistent Low Quality and Widening Disparities. *J Nutr* 2020:nxz299. doi: 10.1093/jn/nxz299
10. Roberts SB, Das SK, Suen VMM, et al. Measured energy content of frequently purchased restaurant meals: multi-country cross sectional study. *BMJ (Clinical research ed)* 2018;363:k4864. doi: 10.1136/bmj.k4864 [published Online First: 2018/12/14]
11. Wolfson JA, Bleich SN. Is cooking at home associated with better diet quality or weight-loss intention? *Public Health Nutr* 2015;18(8):1397-406. doi: 10.1017/s1368980014001943 [published Online First: 2014/11/17]
12. Food and Drug Administration. Food Labeling; Nutrition Labeling of Standard Menu Items in Restaurants and Similar Retail Food Establishments; Calorie Labeling of Articles of Food in Vending Machines; Final Rule In: Department of Health and Human Services, ed., 2014.
13. Petimar J, Zhang F, Cleveland LP, et al. Estimating the effect of calorie menu labeling on calories purchased in a large restaurant franchise in the southern United States: quasi-experimental study. *BMJ (Clinical research ed)* 2019;367:l5837-137. doi: 10.1136/bmj.l5837
14. Shangguan S, Afshin A, Shulkin M, et al. A Meta-Analysis of Food Labeling Effects on Consumer Diet Behaviors and Industry Practices. *American journal of preventive medicine* 2019;56(2):300-14. doi: 10.1016/j.amepre.2018.09.024 [published Online First: 2018/12/24]

15. Block JP, Roberto CA. Potential benefits of calorie labeling in restaurants. *Jama* 2014;312(9):887-88. doi: 10.1001/jama.2014.9239
16. Namba A, Auchincloss A, Leonberg BL, et al. Exploratory analysis of fast-food chain restaurant menus before and after implementation of local calorie-labeling policies, 2005-2011. *Preventing chronic disease* 2013;10:E101-E01. doi: 10.5888/pcd10.120224
17. Bleich SN, Wolfson JA, Jarlenski MP. Calorie changes in large chain restaurants from 2008 to 2015. *Preventive medicine* 2017;100:112-16. doi: 10.1016/j.ypmed.2017.04.004 [published Online First: 2017/04/09]
18. Bleich SN, Moran AJ, Jarlenski MP, et al. Higher-Calorie Menu Items Eliminated in Large Chain Restaurants. *American journal of preventive medicine* 2018;54(2):214-20. doi: 10.1016/j.amepre.2017.11.004 [published Online First: 2017/12/16]
19. Bleich SN, Wolfson JA, Jarlenski MP. Calorie Changes in Large Chain Restaurants: Declines in New Menu Items but Room for Improvement. *American journal of preventive medicine* 2016;50(1):e1-e8. doi: 10.1016/j.amepre.2015.05.007 [published Online First: 2015/07/07]
20. Bleich SN, Wolfson JA, Jarlenski MP, et al. Restaurants With Calories Displayed On Menus Had Lower Calorie Counts Compared To Restaurants Without Such Labels. *Health affairs (Project Hope)* 2015;34(11):1877-84. doi: 10.1377/hlthaff.2015.0512
21. Liu J, Mozaffarian D, Sy S, et al. Health and Economic Impacts of the National Menu Calorie Labeling Law in the United States: A Microsimulation Study. *Circ Cardiovasc Qual Outcomes* 2020;13(6):e006313. doi: 10.1161/circoutcomes.119.006313 [published Online First: 2020/06/05]
22. Kim DD, Wilde PE, Michaud DS, et al. Cost Effectiveness of Nutrition Policies on Processed Meat: Implications for Cancer Burden in the U.S. *American journal of preventive medicine* 2019 doi: 10.1016/j.amepre.2019.02.023 [published Online First: 2019/10/01]
23. Kim DD, Wilde PE, Michaud DS, et al. Cost Effectiveness of Nutrition Policies on Processed Meat: Implications for Cancer Burden in the U.S. *American Journal of Preventive Medicine*, 2019.
24. Freedman LS, Midthune D, Carroll RJ, et al. Adjustments to improve the estimation of usual dietary intake distributions in the population. *J Nutr* 2004;134(7):1836-43. doi: 10.1093/jn/134.7.1836 [published Online First: 2004/07/01]
25. Herrick KA, Rossen LM, Parsons R, et al. Estimating Usual Dietary Intake From National Health and Nutrition Examination Survey Data Using the National Cancer Institute Method. *Vital and health statistics Series 2, Data evaluation and methods research* 2018(178):1-63. [published Online First: 2018/05/19]
26. Dodd KW, Guenther PM, Freedman LS, et al. Statistical methods for estimating usual intake of nutrients and foods: a review of the theory. *Journal of the American Dietetic Association* 2006;106(10):1640-50. doi: 10.1016/j.jada.2006.07.011 [published Online First: 2006/09/27]
27. Hall KD, Sacks G, Chandramohan D, et al. Quantification of the effect of energy imbalance on bodyweight. *Lancet (London, England)* 2011;378(9793):826-37. doi: 10.1016/s0140-6736(11)60812-x [published Online First: 2011/08/30]
28. Hall KD, Schoeller DA, Brown AW. Reducing Calories to Lose Weight. *Jama* 2018;319(22):2336-37. doi: 10.1001/jama.2018.4257 [published Online First: 2018/06/14]



- 1
  - 2
  - 3
  - 4
  - 5
  - 6
  - 7
  - 8
  - 9
  - 10
  - 11
  - 12
  - 13
  - 14
  - 15
  - 16
  - 17
  - 18
  - 19
  - 20
  - 21
  - 22
  - 23
  - 24
  - 25
  - 26
  - 27
  - 28
  - 29
  - 30
  - 31
  - 32
  - 33
  - 34
  - 35
  - 36
  - 37
  - 38
  - 39
  - 40
  - 41
  - 42
  - 43
  - 44
  - 45
  - 46
  - 47
  - 48
  - 49
  - 50
  - 51
  - 52
  - 53
  - 54
  - 55
  - 56
  - 57
  - 58
  - 59
  - 60
29. Mozaffarian D, Hao T, Rimm EB, et al. Changes in diet and lifestyle and long-term weight gain in women and men. *The New England journal of medicine* 2011;364(25):2392-404. doi: 10.1056/NEJMoa1014296 [published Online First: 2011/06/24]
30. Micha R, Penalvo JL, Cudhea F, et al. Association Between Dietary Factors and Mortality From Heart Disease, Stroke, and Type 2 Diabetes in the United States. *Jama* 2017;317(9):912-24. doi: 10.1001/jama.2017.0947 [published Online First: 2017/03/08]
31. Mariotto AB, Yabroff KR, Shao Y, et al. Projections of the cost of cancer care in the United States: 2010-2020. *Journal of the National Cancer Institute* 2011;103(2):117-28. doi: 10.1093/jnci/djq495 [published Online First: 2011/01/14]
32. United States Census Bureau. Projections for the United States: 2017 to 2060 [Available from: <https://www.census.gov/data/tables/2017/demo/popproj/2017-summary-tables.html> accessed July 3 2019.
33. Brenner H. Long-term survival rates of cancer patients achieved by the end of the 20th century: a period analysis. *Lancet (London, England)* 2002;360(9340):1131-5. doi: 10.1016/s0140-6736(02)11199-8 [published Online First: 2002/10/22]
34. Brenner H, Hakulinen T. Up-to-date and precise estimates of cancer patient survival: model-based period analysis. *American journal of epidemiology* 2006;164(7):689-96. doi: 10.1093/aje/kwj243 [published Online First: 2006/07/15]
35. Brenner H, Hakulinen T. Up-to-date cancer survival: period analysis and beyond. *International journal of cancer* 2009;124(6):1384-90. doi: 10.1002/ijc.24021 [published Online First: 2008/12/06]
36. Food and Drug Administration. Justification of Estimates for Appropriations Committees Fiscal Year 2012, 2012.
37. Food and Drug Administration. The Nutrition Review Project. Report to the Director, Center for Food Safety and Applied Nutrition, 2014.
38. Martin AB, Hartman M, Washington B, et al. National Health Care Spending In 2017: Growth Slows To Post-Great Recession Rates; Share Of GDP Stabilizes. *Health affairs (Project Hope)* 2019;38(1):101377hlthaff201805085. doi: 10.1377/hlthaff.2018.05085 [published Online First: 2018/12/07]
39. French EB, McCauley J, Aragon M, et al. End-Of-Life Medical Spending In Last Twelve Months Of Life Is Lower Than Previously Reported. *Health affairs (Project Hope)* 2017;36(7):1211-17. doi: 10.1377/hlthaff.2017.0174 [published Online First: 2017/07/07]
40. Hogan C, Lunney J, Gabel J, et al. Medicare beneficiaries' costs of care in the last year of life. *Health affairs (Project Hope)* 2001;20(4):188-95. doi: 10.1377/hlthaff.20.4.188 [published Online First: 2001/07/21]
41. Yabroff KR, Davis WW, Lamont EB, et al. Patient time costs associated with cancer care. *Journal of the National Cancer Institute* 2007;99(1):14-23. doi: 10.1093/jnci/djk001 [published Online First: 2007/01/05]
42. Yabroff KR, Guy GP, Jr., Ekwueme DU, et al. Annual patient time costs associated with medical care among cancer survivors in the United States. *Medical care* 2014;52(7):594-601. doi: 10.1097/mlr.000000000000151 [published Online First: 2014/06/14]
43. Zheng Z, Yabroff KR, Guy GP, Jr., et al. Annual Medical Expenditure and Productivity Loss Among Colorectal, Female Breast, and Prostate Cancer Survivors in the United States. *Journal of the National Cancer Institute* 2016;108(5) doi: 10.1093/jnci/djv382 [published Online First: 2015/12/26]

- 1  
2  
3  
4  
5  
6  
7  
8  
9  
10  
11  
12  
13  
14  
15  
16  
17  
18  
19  
20  
21  
22  
23  
24  
25  
26  
27  
28  
29  
30  
31  
32  
33  
34  
35  
36  
37  
38  
39  
40  
41  
42  
43  
44  
45  
46  
47  
48  
49  
50  
51  
52  
53  
54  
55  
56  
57  
58  
59  
60
44. Guy GP, Jr., Ekwueme DU, Yabroff KR, et al. Economic burden of cancer survivorship among adults in the United States. *Journal of clinical oncology : official journal of the American Society of Clinical Oncology* 2013;31(30):3749-57. doi: 10.1200/jco.2013.49.1241 [published Online First: 2013/09/18]
  45. Sanders GD, Neumann PJ, Basu A, et al. Recommendations for Conduct, Methodological Practices, and Reporting of Cost-effectiveness Analyses: Second Panel on Cost-Effectiveness in Health and Medicine. *Jama* 2016;316(10):1093-103. doi: 10.1001/jama.2016.12195 [published Online First: 2016/09/14]
  46. Neumann PJ, Cohen JT, Weinstein MC. Updating cost-effectiveness--the curious resilience of the \$50,000-per-QALY threshold. *The New England journal of medicine* 2014;371(9):796-7. doi: 10.1056/NEJMp1405158 [published Online First: 2014/08/28]
  47. Greenberg D, Earle C, Fang CH, et al. When is cancer care cost-effective? A systematic overview of cost-utility analyses in oncology. *Journal of the National Cancer Institute* 2010;102(2):82-8. doi: 10.1093/jnci/djp472 [published Online First: 2010/01/09]
  48. Tina Shih YC, Dong W, Xu Y, et al. Assessing the Cost-Effectiveness of Updated Breast Cancer Screening Guidelines for Average-Risk Women. *Value in health : the journal of the International Society for Pharmacoeconomics and Outcomes Research* 2019;22(2):185-93. doi: 10.1016/j.jval.2018.07.880 [published Online First: 2019/02/04]
  49. Ladabaum U, Mannalithara A, Meester RGS, et al. Cost-Effectiveness and National Effects of Initiating Colorectal Cancer Screening for Average-Risk Persons at Age 45 Years Instead of 50 Years. *Gastroenterology* 2019;157(1):137-48. doi: 10.1053/j.gastro.2019.03.023 [published Online First: 2019/04/02]
  50. Roth JA, Gulati R, Gore JL, et al. Economic Analysis of Prostate-Specific Antigen Screening and Selective Treatment Strategies. *JAMA oncology* 2016;2(7):890-8. doi: 10.1001/jamaoncol.2015.6275 [published Online First: 2016/03/25]
  51. Wilde P, Huang Y, Sy S, et al. Cost-Effectiveness of a US National Sugar-Sweetened Beverage Tax With a Multistakeholder Approach: Who Pays and Who Benefits. *Am J Public Health* 2019;109(2):276-84. doi: 10.2105/AJPH.2018.304803 [published Online First: 2018/12/20]
  52. Huang Y, Kyridemos C, Liu J, et al. Cost-Effectiveness of the US Food and Drug Administration Added Sugar Labeling Policy for Improving Diet and Health. *Circulation* 2019;139(23):2613-24. doi: 10.1161/CIRCULATIONAHA.118.036751 [published Online First: 2019/04/15]
  53. Du M, Griecchi CF, Cudhea FF, et al. Cost-effectiveness Analysis of Nutrition Facts Added-Sugar Labeling and Obesity-Associated Cancer Rates in the US. *JAMA Network Open* 2021;4(4):e217501-e01. doi: 10.1001/jamanetworkopen.2021.7501
  54. Zhang FF, Cudhea F, Shan Z, et al. Preventable Cancer Burden Associated With Poor Diet in the United States. *JNCI Cancer Spectr* 2019;3(2):pkz034. doi: 10.1093/jncics/pkz034 [published Online First: 2019/07/31]
  55. Feng W, Fox A. Menu labels, for better, and worse? Exploring socio-economic and race-ethnic differences in menu label use in a national sample. *Appetite* 2018;128:223-32. doi: 10.1016/j.appet.2018.06.015 [published Online First: 2018/06/13]
  56. Green JE, Brown AG, Ohri-Vachaspati P. Sociodemographic disparities among fast-food restaurant customers who notice and use calorie menu labels. *Journal of the Academy of Nutrition and Dietetics* 2015;115(7):1093-101. doi: 10.1016/j.jand.2014.12.004 [published Online First: 2015/02/11]

- 1  
2  
3 57. Lee-Kwan SH, Pan L, Maynard LM, et al. Factors Associated with Self-Reported Menu-  
4 Labeling Usage among US Adults. *Journal of the Academy of Nutrition and Dietetics*  
5 2016;116(7):1127-35. doi: 10.1016/j.jand.2015.12.015 [published Online First:  
6 2016/02/10]  
7  
8 58. Malloy-Weir L, Cooper M. Health literacy, literacy, numeracy and nutrition label  
9 understanding and use: a scoping review of the literature. *J Hum Nutr Diet*  
10 2017;30(3):309-25. doi: 10.1111/jhn.12428 [published Online First: 2016/10/13]  
11  
12 59. Nogueira LM, Thai CL, Nelson W, et al. Nutrition Label Numeracy: Disparities and  
13 Association with Health Behaviors. *American journal of health behavior* 2016;40(4):427-  
14 36. doi: 10.5993/ajhb.40.4.4 [published Online First: 2016/06/25]  
15  
16 60. Gortmaker SL, Wang YC, Long MW, et al. Three Interventions That Reduce Childhood  
17 Obesity Are Projected To Save More Than They Cost To Implement. *Health affairs*  
18 *(Project Hope)* 2015;34(11):1932-9. doi: 10.1377/hlthaff.2015.0631 [published Online  
19 First: 2015/11/04]  
20  
21 61. Kuo T, Jarosz CJ, Simon P, et al. Menu labeling as a potential strategy for combating the  
22 obesity epidemic: a health impact assessment. *Am J Public Health* 2009;99(9):1680-86.  
23 doi: 10.2105/AJPH.2008.153023 [published Online First: 2009/07/16]  
24  
25  
26  
27  
28  
29  
30  
31  
32  
33  
34  
35  
36  
37  
38  
39  
40  
41  
42  
43  
44  
45  
46  
47  
48  
49  
50  
51  
52  
53  
54  
55  
56  
57  
58  
59  
60

1  
2  
3 **Figure 1.** Estimated New Cancer Cases and Deaths Prevented by Federal Menu Calorie Labeling Policy  
4  
5 in the US by Cancer Type over a Lifetime  
6  
7  
8  
9

10 **Figure 2.** Probabilistic Sensitivity Analyses (PSA) for Cost-Effectiveness of the Federal Menu Calorie  
11  
12 Labeling Policy over 10 years and a Lifetime  
13  
14

15 **Legend:** Values are presented in cost-effectiveness planes of net costs (\$millions) versus incremental  
16  
17 quality-adjusted life years (QALYs). For each policy scenario, each colored dot represents one of the  
18  
19 1000 simulations, with the largest dot showing the median incremental cost-effectiveness ratio (ICER,  
20  
21 \$/QALY); and the ellipse representing the 95% UIs. Results are presented from the societal perspective  
22  
23 and the healthcare perspective. Negative values indicate cost savings.  
24  
25  
26  
27  
28  
29  
30  
31  
32  
33  
34  
35  
36  
37  
38  
39  
40  
41  
42  
43  
44  
45  
46  
47  
48  
49  
50  
51  
52  
53  
54  
55  
56  
57  
58  
59  
60

1  
2  
3  
4  
5  
6  
7  
8  
9  
10  
11  
12  
13  
14  
15  
16  
17  
18  
19  
20  
21  
22  
23  
24  
25  
26  
27  
28  
29  
30  
31  
32  
33  
34  
35  
36  
37  
38  
39  
40  
41  
42  
43  
44  
45  
46  
47

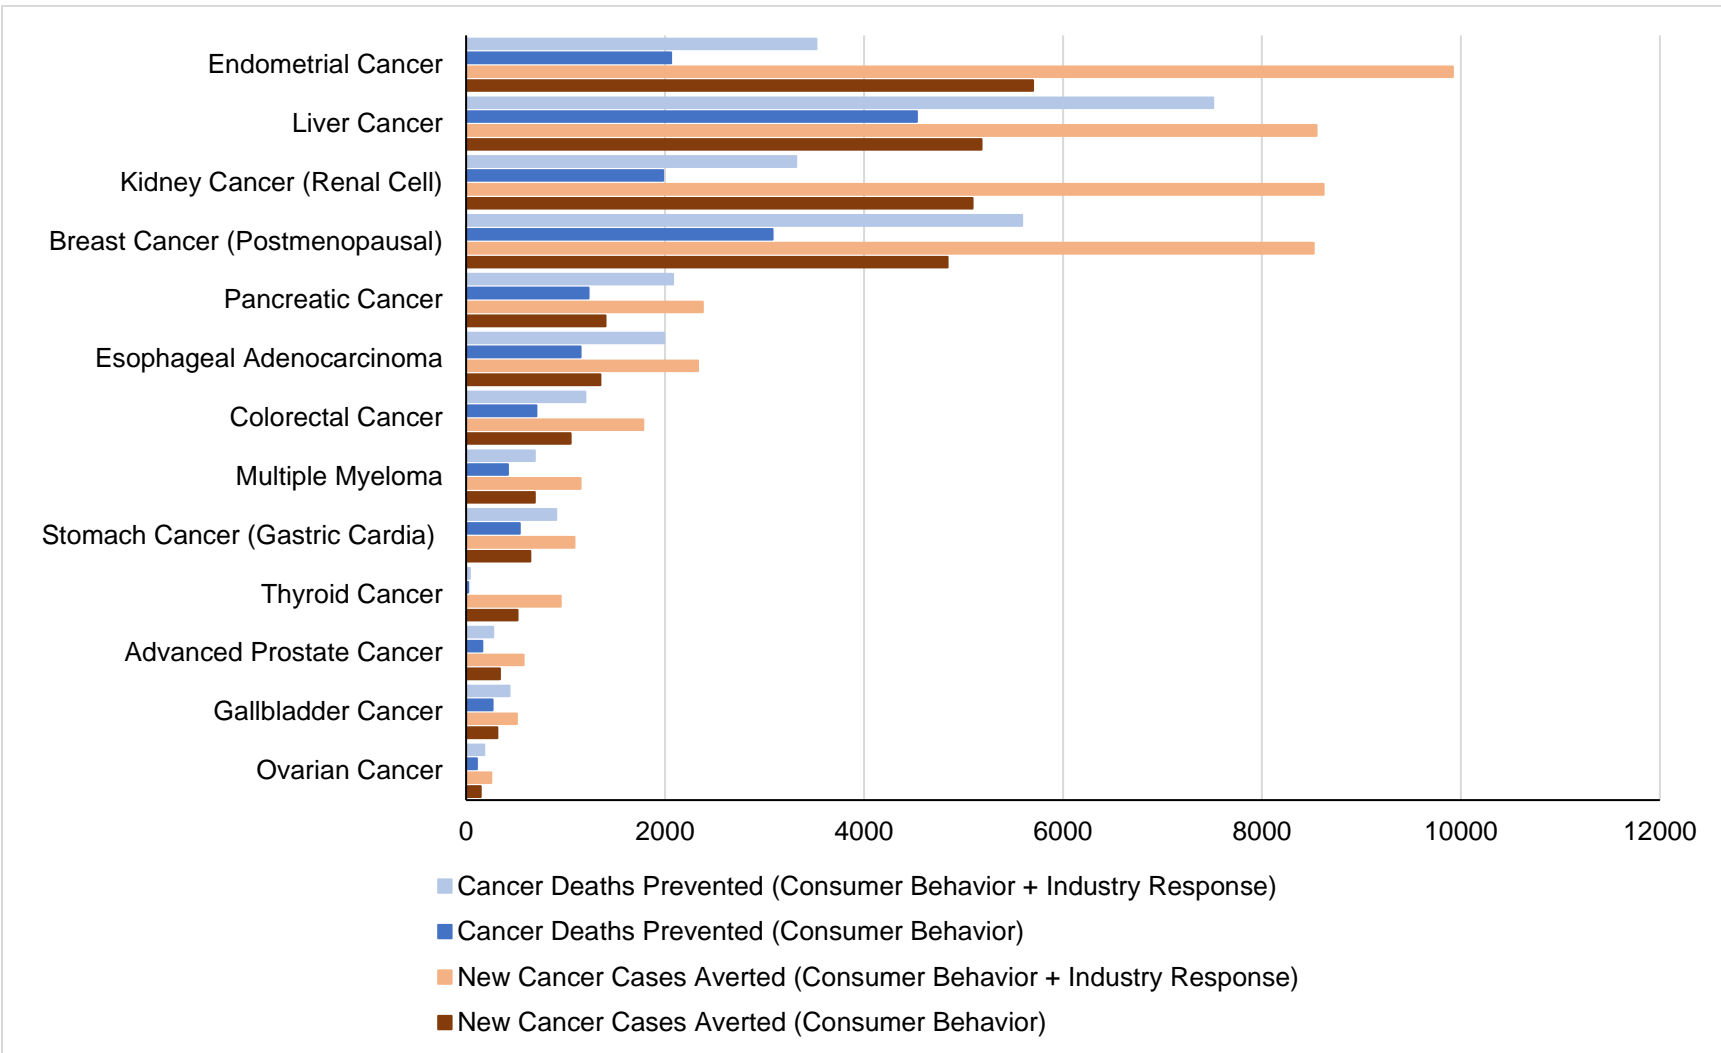

**Figure 1. Estimated New Cancer Cases and Deaths Prevented by Federal Menu Calorie Labeling Policy in the US by Cancer Type over a Lifetime**

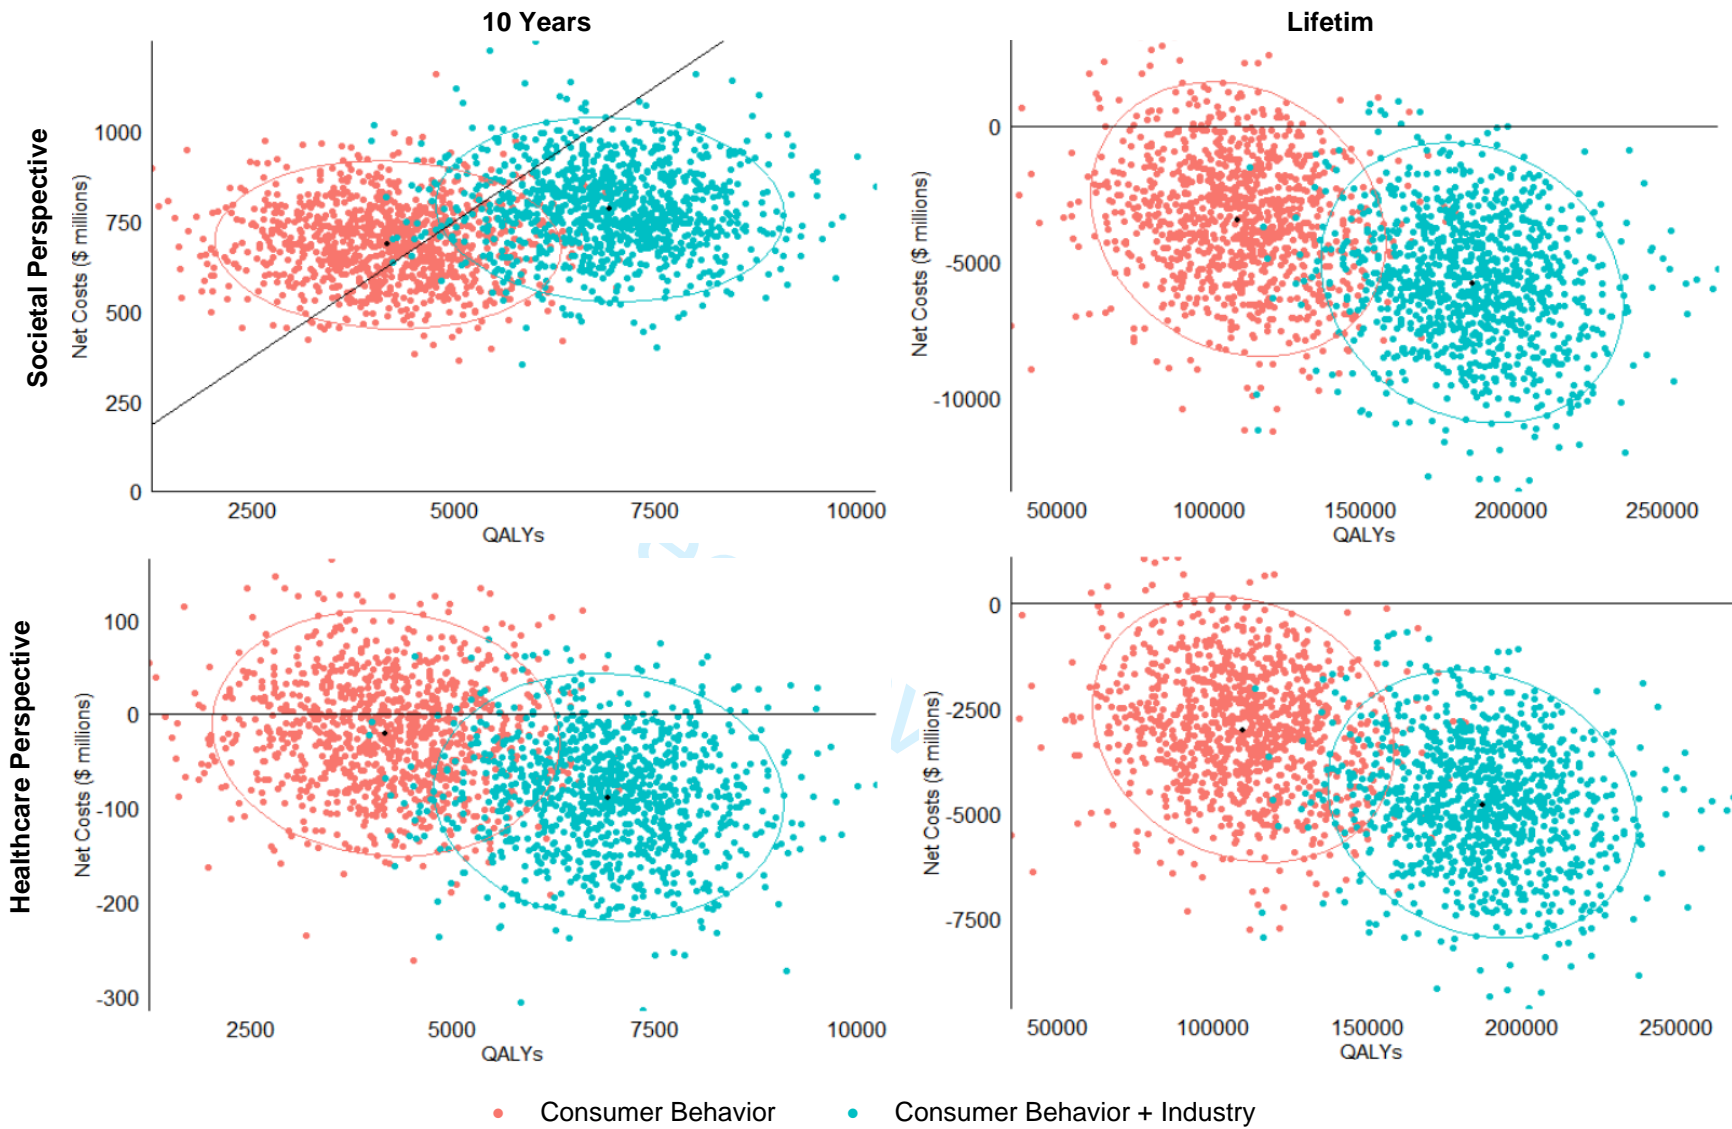

Values are presented in cost-effectiveness planes of net costs (\$millions) versus incremental quality-adjusted life years (QALYs). For each policy scenario, each colored dot represents one of the 1000 simulations, with the largest dot showing the median incremental cost-effectiveness ratio (ICER, \$/QALY); and the ellipse representing the 95% UIs. Results are presented from the societal perspective and the healthcare perspective. Negative values indicate cost savings.

**Figure 2. Probabilistic Sensitivity Analyses (PSA) for Cost-Effectiveness of the Federal Menu Calorie Labeling Policy over 10 years and a Lifetime**

**Title** Cost-Effectiveness Analysis of the Federal Menu Calorie Labeling and Obesity-Associated Cancer Burdens in the United States

**Supplementary Table 1.** Defining Population and 32 Subgroups

**Supplementary Table 2.** Relative Risk Estimates of Etiologic Relationships Between Body Mass Index (BMI) and 13 Types of Cancers

**Supplementary Table 3.** Baseline Incidence Rates of 13 Cancers among US Adults by 32 Subgroups

**Supplementary Table 4.** Baseline 5-year Relative Survival Rates of 13 Cancers among US Adults by 32 Subgroups

**Supplementary Table 5.** Health-Related Quality of Life Among US Cancer Patients Aged 20 Years or Older, by Cancer Type and Phase of Care

**Supplementary Table 6.** Baseline Medical Costs, Productivity Loss, and Patient Time Costs Among US Cancer Patients Aged 20 Years or Older, by Cancer Type and Phase of Care

**Supplementary Table 7.** Baseline Medical Costs, Productivity Loss, and Patient Time Costs Among the General Population Aged 20 Years or Older in the US, by 32 Subgroups

**Supplementary Table 8.** Characteristics of US Adults Aged 20 Years or Older Participated in the NHANES, 2013-2016

**Supplementary Table 9.** Consumption of Calories from Full-Service and Fast-Food Restaurants among US Adults Participated in 2013-2016 NHANES, by 32 Subgroups

**Supplementary Table 10.** Estimated New Cancer Cases Averted by the Federal Menu Calorie Labeling in the US by Age, Sex, Race/Ethnicity, and Cancer Type, Over a Lifetime

**Supplementary Table 11.** Estimated Cancer Deaths Reduced by the Federal Menu Calorie Labeling in the US by Age, Sex, Race/Ethnicity, and Cancer Type, Over a Lifetime

**Supplementary Table 12.** Estimated Health Gains and Costs Associated with the Federal Menu Calorie Labeling on Reducing Cancer Burdens in the US Over a Lifetime, One-Way Sensitivity Analyses at 25% and 75% Calorie Compensations Outside the Restaurant Settings

**Supplementary Table 13.** Estimated Health Gains and Costs Associated with the Federal Menu Calorie Labeling on Reducing Cancer Burdens in the US Over a Lifetime, One-Way Sensitivity Analysis, Assuming all Full-Service and Fast-Food Restaurants were Covered by the Policy

**Supplementary Figure 1.** Diet and Cancer Outcome Model (DiCOM)

**Supplementary Figure 2.** Estimated Reduced New Cancer Cases and Deaths Associated with the Federal Menu Calorie Labeling in the US by Age, Sex, Race/Ethnicity, and Cancer Type, Over a Lifetime

**Supplementary Figure 3.** Estimated life Years and QALYs Gained Associated with the Federal Menu Calorie Labeling in the US by Age, Sex, and Race/Ethnicity, Over a Lifetime.

**Supplementary Figure 4.** Estimated Changes of Health-Related Costs Associated with the Federal Menu Calorie Labeling in the US by Age, Sex, Race/Ethnicity, and Cancer Type, Over a Lifetime

**Supplementary Figure 5.** Estimated Net Costs from Societal and Healthcare Perspectives Associated with the Federal Menu Calorie Labeling in the US by Age, Sex, and Race/Ethnicity, Over a Lifetime

**Supplementary Figure 6.** One-Way Sensitivity Analysis of Net Costs of the Federal Menu Calorie Labeling and Obesity-Associated Cancer Rates to Varying Assumptions of Key Input Parameters From (A) Societal Perspective and (B) Healthcare Perspective

**Supplementary Table 1.** Defining population and 32 subgroups

| <b>Subgroups</b> | <b>Age</b> | <b>Sex</b> | <b>Race/Ethnicity</b> |
|------------------|------------|------------|-----------------------|
| <b>1</b>         | 20-44y     | Female     | NHW                   |
| <b>2</b>         | 20-44y     | Female     | NHB                   |
| <b>3</b>         | 20-44y     | Female     | HISP                  |
| <b>4</b>         | 20-44y     | Female     | OTH                   |
| <b>5</b>         | 20-44y     | Male       | NHW                   |
| <b>6</b>         | 20-44y     | Male       | NHB                   |
| <b>7</b>         | 20-44y     | Male       | HISP                  |
| <b>8</b>         | 20-44y     | Male       | OTH                   |
| <b>9</b>         | 45-54y     | Female     | NHW                   |
| <b>10</b>        | 45-54y     | Female     | NHB                   |
| <b>11</b>        | 45-54y     | Female     | HISP                  |
| <b>12</b>        | 45-54y     | Female     | OTH                   |
| <b>13</b>        | 45-54y     | Male       | NHW                   |
| <b>14</b>        | 45-54y     | Male       | NHB                   |
| <b>15</b>        | 45-54y     | Male       | HISP                  |
| <b>16</b>        | 45-54y     | Male       | OTH                   |
| <b>17</b>        | 55-64y     | Female     | NHW                   |
| <b>18</b>        | 55-64y     | Female     | NHB                   |
| <b>19</b>        | 55-64y     | Female     | HISP                  |
| <b>20</b>        | 55-64y     | Female     | OTH                   |
| <b>21</b>        | 55-64y     | Male       | NHW                   |
| <b>22</b>        | 55-64y     | Male       | NHB                   |
| <b>23</b>        | 55-64y     | Male       | HISP                  |
| <b>24</b>        | 55-64y     | Male       | OTH                   |
| <b>25</b>        | 65+y       | Female     | NHW                   |
| <b>26</b>        | 65+y       | Female     | NHB                   |
| <b>27</b>        | 65+y       | Female     | HISP                  |
| <b>28</b>        | 65+y       | Female     | OTH                   |
| <b>29</b>        | 65+y       | Male       | NHW                   |
| <b>30</b>        | 65+y       | Male       | NHB                   |
| <b>31</b>        | 65+y       | Male       | HISP                  |
| <b>32</b>        | 65+y       | Male       | OTH                   |



**Supplementary Table 2.** Relative risk estimates of etiologic relationships between body mass index (BMI) and 13 types of cancers

| Cancer Type                    | No. of Studies | No. of Events | Source                   | Evidence Grading           | RR (95% CI)<br>Per 5 kg/m <sup>2</sup> | Statistical Heterogeneity         |
|--------------------------------|----------------|---------------|--------------------------|----------------------------|----------------------------------------|-----------------------------------|
| Endometrial                    | 26             | 18,717        | CUP, 2013                | Convincing<br>↑risk        | 1.50 (1.42-1.59)                       | I <sup>2</sup> =86.2%<br>P<0.0001 |
| Esophageal<br>(adenocarcinoma) | 9              | 1,725         | CUP, 2016                | Convincing<br>↑risk        | 1.48 (1.35-1.62)                       | I <sup>2</sup> =36.7%<br>P=0.13   |
| Kidney                         | 23             | 15,575        | CUP, 2015                | Convincing<br>↑risk        | 1.30 (1.25-1.35)                       | I <sup>2</sup> =38.8%<br>P=0.03   |
| Liver                          | 12             | 14,311        | CUP, 2015                | Convincing<br>↑risk        | 1.30 (1.16-1.46)                       | I <sup>2</sup> =78.3%<br>P=0.000  |
| Gallbladder                    | 8              | 6,004         | CUP, 2015                | Probable<br>↑risk          | 1.25 (1.15-1.37)                       | I <sup>2</sup> =52.3%<br>P=0.04   |
| Stomach (cardia)               | 7              | 2,050         | CUP, 2016                | Probable<br>↑risk          | 1.23 (1.07-1.40)                       | I <sup>2</sup> =55.6%<br>P=0.04   |
| Breast (post-<br>menopausal)   | 56             | 80,404        | CUP, 2017                | Convincing<br>↑risk        | 1.12 (1.09-1.15)                       | I <sup>2</sup> =75%<br>P<0.001    |
| Pancreas                       | 23             | 9,504         | CUP, 2011                | Convincing<br>↑risk        | 1.10 (1.07-1.14)                       | I <sup>2</sup> =19%<br>P=0.20     |
| Multiple myeloma               | 20             | 1,388         | IARC, 2016 <sup>30</sup> | Sufficient (IRAC)<br>↑risk | 1.09 (1.03-1.16)                       | Not reported                      |
| Prostate (advanced)            | 24             | 11,149        | CUP, 2014                | Probable<br>↑risk          | 1.08 (1.04-1.12)                       | I <sup>2</sup> =18.8%<br>P=0.21   |
| Thyroid                        | 22             | 3,100         | IARC, 2016 <sup>30</sup> | Sufficient (IARC)<br>↑risk | 1.06 (1.02-1.10)                       | Not reported                      |
| Ovary                          | 25             | 15,899        | CUP, 2013                | Probable<br>↑risk          | 1.06 (1.02-1.11)                       | I <sup>2</sup> =55.1%<br>P=0.001  |
| Colorectal                     | 38             | 71,089        | CUP, 2017                | Convincing<br>↑risk        | 1.05 (1.03-1.07)                       | I <sup>2</sup> =74.2%<br>P=0.000  |

**Supplementary Table 3. Baseline incidence rates of 13 cancers among US adults by 32 subgroups**

| Subgroup | Colorectal Cancer |       | Endometrial Cancer |      | Esophageal Adeno-carcinoma |      | Female Breast (Postmeno.) |       | Gallbladder Cancer |      | Kidney Cancer |      | Liver Cancer |      | Multiple Myeloma |      | Ovarian cancer |      | Pancreatic Cancer |      | Advanced Prostate Cancer |      | Stomach Cancer (Gastric Cardia) |      | Thyroid Cancer |      |
|----------|-------------------|-------|--------------------|------|----------------------------|------|---------------------------|-------|--------------------|------|---------------|------|--------------|------|------------------|------|----------------|------|-------------------|------|--------------------------|------|---------------------------------|------|----------------|------|
|          | Rate              | SE    | Rate               | SE   | Rate                       | SE   | Rate                      | SE    | Rate               | SE   | Rate          | SE   | Rate         | SE   | Rate             | SE   | Rate           | SE   | Rate              | SE   | Rate                     | SE   | Rate                            | SE   | Rate           | SE   |
| 1        | 8.53              | 0.38  | 6.54               | 3.66 | 0.05                       | 4.18 | 0.00                      | 0.00  | 0.05               | 2.57 | 3.83          | 3.16 | 0.49         | 4.18 | 0.38             | 4.66 | 4.31           | 0.27 | 107               | 3.46 | 0.00                     | 0.00 | 0.10                            | 3.82 | 28.97          | 0.69 |
| 2        | 7.78              | 0.74  | 5.04               | 0.59 | 0.03                       | 0.20 | 0.00                      | 0.00  | 0.07               | 2.46 | 3.57          | 0.50 | 0.56         | 0.20 | 102              | 0.27 | 2.98           | 0.45 | 103               | 0.26 | 0.00                     | 0.00 | 0.09                            | 2.25 | 13.12          | 0.95 |
| 3        | 6.09              | 0.55  | 7.49               | 3.32 | 0.03                       | 3.07 | 0.00                      | 0.00  | 0.06               | 2.48 | 3.73          | 3.16 | 0.42         | 3.07 | 0.33             | 3.71 | 3.95           | 0.46 | 0.86              | 0.87 | 0.00                     | 0.00 | 0.09                            | 2.27 | 20.97          | 1.13 |
| 4        | 6.36              | 1.10  | 6.56               | 1.13 | 0.02                       | 0.15 | 0.00                      | 0.00  | 0.07               | 2.58 | 1.87          | 0.40 | 0.32         | 0.15 | 0.38             | 0.23 | 4.49           | 0.70 | 0.74              | 0.25 | 0.00                     | 0.00 | 0.09                            | 2.36 | 24.88          | 2.21 |
| 5        | 9.20              | 0.39  | 0.00               | 0.00 | 0.42                       | 5.22 | 0.00                      | 0.00  | 0.04               | 0.02 | 5.91          | 4.53 | 0.60         | 5.22 | 0.48             | 5.26 | 0.00           | 0.00 | 122               | 2.06 | 0.21                     | 0.02 | 0.43                            | 4.32 | 6.93           | 0.34 |
| 6        | 7.94              | 0.78  | 0.00               | 0.00 | 0.29                       | 0.30 | 0.00                      | 0.00  | 0.04               | 0.02 | 5.47          | 0.65 | 1.17         | 0.30 | 148              | 0.34 | 0.00           | 0.00 | 100               | 0.28 | 0.56                     | 0.09 | 0.34                            | 3.42 | 2.36           | 0.42 |
| 7        | 6.15              | 0.54  | 0.00               | 0.00 | 0.31                       | 3.85 | 0.00                      | 0.00  | 0.04               | 0.02 | 4.04          | 3.82 | 0.82         | 3.85 | 0.57             | 0.18 | 0.00           | 0.00 | 0.83              | 0.20 | 0.13                     | 0.68 | 0.34                            | 3.53 | 3.80           | 0.44 |
| 8        | 6.21              | 0.85  | 0.00               | 0.00 | 0.31                       | 0.47 | 0.00                      | 0.00  | 0.05               | 0.02 | 3.68          | 1.04 | 1.59         | 0.47 | 0.70             | 140  | 0.00           | 0.00 | 0.82              | 0.29 | 0.41                     | 0.09 | 0.36                            | 3.52 | 5.70           | 0.84 |
| 9        | 4127              | 0.76  | 38.53              | 0.73 | 103                        | 0.21 | 124.56                    | 1.28  | 0.68               | 5.99 | 14.03         | 0.44 | 3.10         | 0.21 | 3.60             | 0.22 | 17.09          | 0.49 | 7.70              | 0.32 | 0.00                     | 0.00 | 0.88                            | 6.74 | 37.84          | 0.73 |
| 10       | 53.14             | 1.92  | 25.73              | 1.34 | 0.59                       | 0.60 | 121.73                    | 2.88  | 1.54               | 5.87 | 16.08         | 1.06 | 5.17         | 0.60 | 11.29            | 0.89 | 11.75          | 0.90 | 10.91             | 0.87 | 0.00                     | 0.00 | 0.94                            | 5.38 | 25.80          | 1.34 |
| 11       | 33.92             | 1.78  | 33.43              | 1.53 | 0.59                       | 0.52 | 77.25                     | 3.45  | 2.27               | 1.93 | 16.00         | 1.04 | 3.83         | 0.52 | 4.86             | 0.58 | 14.57          | 1.00 | 6.26              | 0.66 | 0.00                     | 0.00 | 0.81                            | 5.61 | 37.29          | 1.84 |
| 12       | 35.77             | 3.15  | 35.84              | 3.07 | 0.65                       | 0.66 | 91.82                     | 4.82  | 1.70               | 6.05 | 7.78          | 1.92 | 3.27         | 0.66 | 2.55             | 0.70 | 17.07          | 1.51 | 5.17              | 0.81 | 0.00                     | 0.00 | 0.85                            | 5.53 | 37.73          | 2.90 |
| 13       | 53.97             | 0.87  | 0.00               | 0.00 | 5.61                       | 0.36 | 0.00                      | 0.00  | 0.36               | 7.15 | 29.16         | 0.64 | 9.24         | 0.36 | 5.09             | 0.27 | 0.00           | 0.00 | 10.63             | 0.38 | 10.88                    | 0.16 | 3.65                            | 0.23 | 13.29          | 0.43 |
| 14       | 61.29             | 2.20  | 0.00               | 0.00 | 1.50                       | 1.02 | 0.00                      | 0.00  | 0.47               | 5.07 | 32.82         | 1.61 | 13.29        | 1.02 | 12.34            | 0.99 | 0.00           | 0.00 | 14.12             | 1.05 | 25.31                    | 0.58 | 1.90                            | 0.33 | 6.41           | 0.71 |
| 15       | 38.05             | 1.94  | 0.00               | 0.00 | 2.75                       | 1.06 | 0.00                      | 0.00  | 0.43               | 4.83 | 24.48         | 1.27 | 16.38        | 1.06 | 5.23             | 0.60 | 0.00           | 0.00 | 7.95              | 0.74 | 6.02                     | 0.38 | 1.96                            | 0.34 | 8.56           | 0.76 |
| 16       | 42.81             | 3.85  | 0.00               | 0.00 | 2.88                       | 2.28 | 0.00                      | 0.00  | 0.37               | 4.93 | 18.63         | 3.06 | 18.71        | 2.28 | 3.70             | 0.82 | 0.00           | 0.00 | 7.62              | 1.05 | 3.70                     | 0.50 | 2.51                            | 0.17 | 12.57          | 1.36 |
| 17       | 59.74             | 0.89  | 90.00              | 1.09 | 2.12                       | 0.35 | 305.45                    | 2.02  | 1.75               | 0.15 | 26.14         | 0.59 | 9.41         | 0.35 | 8.68             | 0.34 | 26.19          | 0.59 | 21.78             | 0.54 | 0.00                     | 0.00 | 1.72                            | 0.15 | 34.42          | 0.67 |
| 18       | 86.11             | 2.62  | 83.71              | 2.60 | 1.30                       | 1.21 | 306.22                    | 4.92  | 4.08               | 0.57 | 31.53         | 1.58 | 18.22        | 1.21 | 23.28            | 1.37 | 19.79          | 1.25 | 31.37             | 1.58 | 0.00                     | 0.00 | 1.92                            | 0.39 | 27.72          | 1.48 |
| 19       | 58.14             | 2.91  | 69.51              | 3.28 | 1.64                       | 1.33 | 218.85                    | 7.01  | 4.59               | 0.68 | 29.93         | 1.73 | 17.38        | 1.33 | 9.33             | 0.97 | 21.29          | 1.45 | 17.15             | 1.32 | 0.00                     | 0.00 | 1.87                            | 0.34 | 39.44          | 1.97 |
| 20       | 52.83             | 4.48  | 60.22              | 4.45 | 1.49                       | 1.97 | 233.48                    | 8.33  | 2.44               | 0.50 | 13.91         | 2.72 | 12.58        | 1.97 | 6.13             | 0.96 | 23.98          | 2.79 | 13.44             | 1.43 | 0.00                     | 0.00 | 1.57                            | 0.13 | 41.74          | 3.08 |
| 21       | 88.14             | 1.11  | 0.00               | 0.00 | 15.54                      | 0.73 | 0.00                      | 0.00  | 0.93               | 0.11 | 53.65         | 0.87 | 37.93        | 0.73 | 13.24            | 0.43 | 0.00           | 0.00 | 29.95             | 0.65 | 47.05                    | 0.34 | 9.19                            | 0.36 | 16.24          | 0.48 |
| 22       | 121.39            | 3.41  | 0.00               | 0.00 | 4.30                       | 2.72 | 0.00                      | 0.00  | 2.06               | 0.41 | 69.05         | 2.57 | 75.50        | 2.72 | 30.69            | 1.71 | 0.00           | 0.00 | 39.72             | 1.95 | 91.41                    | 1.22 | 4.87                            | 0.68 | 9.12           | 0.92 |
| 23       | 84.75             | 3.65  | 0.00               | 0.00 | 8.01                       | 2.98 | 0.00                      | 0.00  | 1.07               | 0.11 | 51.05         | 2.35 | 61.05        | 2.98 | 13.65            | 1.22 | 0.00           | 0.00 | 23.36             | 1.58 | 32.10                    | 1.21 | 5.15                            | 0.70 | 11.12          | 1.09 |
| 24       | 83.77             | 5.72  | 0.00               | 0.00 | 4.97                       | 4.85 | 0.00                      | 0.00  | 1.22               | 0.11 | 27.95         | 3.81 | 54.13        | 4.85 | 10.32            | 1.39 | 0.00           | 0.00 | 19.14             | 2.87 | 22.70                    | 1.31 | 5.16                            | 0.96 | 16.04          | 1.75 |
| 25       | 147.25            | 1.98  | 86.90              | 1.40 | 4.53                       | 0.62 | 429.43                    | 3.20  | 5.87               | 0.40 | 42.37         | 1.02 | 15.56        | 0.62 | 20.59            | 0.73 | 38.18          | 0.97 | 55.49             | 1.20 | 0.00                     | 0.00 | 4.36                            | 0.34 | 24.59          | 0.74 |
| 26       | 155.86            | 5.74  | 100.81             | 4.21 | 3.10                       | 1.98 | 398.07                    | 8.74  | 9.68               | 1.43 | 50.03         | 3.07 | 20.61        | 1.98 | 50.31            | 3.20 | 29.78          | 2.45 | 71.93             | 3.94 | 0.00                     | 0.00 | 3.41                            | 0.52 | 22.57          | 1.98 |
| 27       | 117.47            | 5.72  | 66.40              | 4.47 | 3.61                       | 3.17 | 285.07                    | 11.57 | 11.44              | 1.75 | 45.35         | 3.33 | 38.69        | 3.17 | 24.20            | 2.52 | 32.78          | 2.88 | 51.54             | 3.79 | 0.00                     | 0.00 | 3.89                            | 0.60 | 29.50          | 2.55 |
| 28       | 109.32            | 10.15 | 52.12              | 5.29 | 3.51                       | 4.72 | 266.14                    | 14.52 | 7.02               | 1.70 | 26.14         | 4.17 | 35.77        | 4.72 | 14.41            | 2.43 | 23.90          | 2.89 | 46.15             | 5.64 | 0.00                     | 0.00 | 4.11                            | 0.28 | 28.15          | 3.08 |
| 29       | 181.07            | 2.47  | 0.00               | 0.00 | 29.02                      | 1.10 | 0.00                      | 0.00  | 3.59               | 0.36 | 88.69         | 1.63 | 40.30        | 1.10 | 34.26            | 1.07 | 0.00           | 0.00 | 72.36             | 1.53 | 80.74                    | 0.61 | 19.38                           | 0.77 | 17.34          | 0.69 |
| 30       | 217.23            | 8.36  | 0.00               | 0.00 | 7.29                       | 3.98 | 0.00                      | 0.00  | 6.24               | 1.14 | 97.13         | 5.16 | 68.31        | 3.98 | 69.18            | 4.66 | 0.00           | 0.00 | 75.66             | 4.94 | 130.67                   | 2.34 | 8.81                            | 1.55 | 10.03          | 1.60 |
| 31       | 182.00            | 9.21  | 0.00               | 0.00 | 15.50                      | 5.01 | 0.00                      | 0.00  | 6.79               | 1.64 | 87.20         | 5.26 | 78.18        | 5.01 | 33.10            | 3.44 | 0.00           | 0.00 | 61.88             | 4.77 | 66.33                    | 2.57 | 11.49                           | 1.78 | 15.87          | 2.11 |
| 32       | 144.37            | 13.43 | 0.00               | 0.00 | 10.56                      | 7.52 | 0.00                      | 0.00  | 4.75               | 1.02 | 54.45         | 7.24 | 79.16        | 7.52 | 22.48            | 3.35 | 0.00           | 0.00 | 51.45             | 6.82 | 51.84                    | 2.78 | 11.34                           | 2.12 | 13.86          | 2.28 |

Supplementary Table 4. Baseline 5-year relative survival rates of 13 cancers among US adults by 32 subgroups

| Subgroup | Colorectal Cancer |       | Endometrial Cancer |       | Esophageal Adeno-carcinoma |       | Female Breast (Postmeno.) |       | Gallbladder Cancer |       | Kidney Cancer |       | Liver Cancer |       | Multiple Myeloma |       | Ovarian Cancer |       | Pancreatic Cancer |       | Advanced Prostate Cancer |       | Stomach Cancer (Gastric Cardia) |       | Thyroid Cancer |       |
|----------|-------------------|-------|--------------------|-------|----------------------------|-------|---------------------------|-------|--------------------|-------|---------------|-------|--------------|-------|------------------|-------|----------------|-------|-------------------|-------|--------------------------|-------|---------------------------------|-------|----------------|-------|
|          | Rate              | SE    | Rate               | SE    | Rate                       | SE    | Rate                      | SE    | Rate               | SE    | Rate          | SE    | Rate         | SE    | Rate             | SE    | Rate           | SE    | Rate              | SE    | Rate                     | SE    | Rate                            | SE    | Rate           | SE    |
| 1        | 0.740             | 0.012 | 0.916              | 0.009 | 0.223                      | 0.018 | 0.000                     | 0.000 | 0.095              | 0.095 | 0.953         | 0.009 | 0.409        | 0.057 | 0.852            | 0.043 | 0.780          | 0.015 | 0.379             | 0.038 | 0.000                    | 0.000 | 0.477                           | 0.099 | 1.000          | 0.001 |
| 2        | 0.652             | 0.024 | 0.775              | 0.027 | 0.223                      | 0.018 | 0.000                     | 0.000 | 0.286              | 0.064 | 0.856         | 0.029 | 0.144        | 0.113 | 0.837            | 0.048 | 0.736          | 0.036 | 0.530             | 0.064 | 0.000                    | 0.000 | 0.502                           | 0.205 | 0.993          | 0.004 |
| 3        | 0.659             | 0.022 | 0.900              | 0.013 | 0.223                      | 0.018 | 0.000                     | 0.000 | 0.309              | 0.092 | 0.864         | 0.021 | 0.403        | 0.081 | 0.713            | 0.075 | 0.716          | 0.024 | 0.493             | 0.062 | 0.000                    | 0.000 | 0.236                           | 0.116 | 0.992          | 0.002 |
| 4        | 0.694             | 0.027 | 0.910              | 0.016 | 0.223                      | 0.018 | 0.000                     | 0.000 | 0.286              | 0.064 | 0.819         | 0.043 | 0.321        | 0.077 | 0.787            | 0.122 | 0.737          | 0.029 | 0.371             | 0.076 | 0.000                    | 0.000 | 0.667                           | 0.193 | 1.000          | 0.002 |
| 5        | 0.682             | 0.012 | 0.000              | 0.000 | 0.140                      | 0.034 | 0.000                     | 0.000 | 0.302              | 0.117 | 0.886         | 0.010 | 0.251        | 0.037 | 0.696            | 0.041 | 0.000          | 0.000 | 0.275             | 0.032 | 0.768                    | 0.057 | 0.284                           | 0.045 | 0.997          | 0.002 |
| 6        | 0.601             | 0.027 | 0.000              | 0.000 | 0.160                      | 0.031 | 0.000                     | 0.000 | 0.357              | 0.096 | 0.779         | 0.027 | 0.157        | 0.045 | 0.606            | 0.057 | 0.000          | 0.000 | 0.151             | 0.046 | 0.780                    | 0.086 | 0.672                           | 0.274 | 0.949          | 0.025 |
| 7        | 0.621             | 0.022 | 0.000              | 0.000 | 0.330                      | 0.108 | 0.000                     | 0.000 | 0.357              | 0.096 | 0.847         | 0.020 | 0.227        | 0.047 | 0.635            | 0.064 | 0.000          | 0.000 | 0.157             | 0.044 | 0.470                    | 0.118 | 0.152                           | 0.055 | 0.993          | 0.007 |
| 8        | 0.635             | 0.029 | 0.000              | 0.000 | 0.287                      | 0.172 | 0.000                     | 0.000 | 0.357              | 0.096 | 0.840         | 0.033 | 0.152        | 0.032 | 0.649            | 0.108 | 0.000          | 0.000 | 0.230             | 0.066 | 0.805                    | 0.180 | 0.545                           | 0.133 | 0.992          | 0.008 |
| 9        | 0.738             | 0.007 | 0.889              | 0.006 | 0.300                      | 0.065 | 0.918                     | 0.003 | 0.153              | 0.045 | 0.846         | 0.011 | 0.283        | 0.027 | 0.682            | 0.027 | 0.614          | 0.012 | 0.195             | 0.017 | 0.000                    | 0.000 | 0.384                           | 0.060 | 0.997          | 0.002 |
| 10       | 0.666             | 0.015 | 0.751              | 0.022 | 0.290                      | 0.174 | 0.810                     | 0.009 | 0.155              | 0.059 | 0.834         | 0.025 | 0.145        | 0.035 | 0.626            | 0.034 | 0.497          | 0.034 | 0.177             | 0.029 | 0.000                    | 0.000 | 0.457                           | 0.144 | 0.990          | 0.008 |
| 11       | 0.725             | 0.016 | 0.869              | 0.012 | 0.751                      | 0.217 | 0.881                     | 0.008 | 0.224              | 0.062 | 0.879         | 0.018 | 0.242        | 0.038 | 0.617            | 0.047 | 0.595          | 0.025 | 0.209             | 0.035 | 0.000                    | 0.000 | 0.257                           | 0.079 | 0.983          | 0.005 |
| 12       | 0.731             | 0.018 | 0.893              | 0.012 | 0.308                      | 0.060 | 0.926                     | 0.007 | 0.210              | 0.082 | 0.810         | 0.037 | 0.287        | 0.051 | 0.686            | 0.071 | 0.640          | 0.027 | 0.307             | 0.055 | 0.000                    | 0.000 | 0.357                           | 0.152 | 0.991          | 0.005 |
| 13       | 0.704             | 0.007 | 0.000              | 0.000 | 0.255                      | 0.020 | 0.000                     | 0.000 | 0.321              | 0.072 | 0.790         | 0.009 | 0.171        | 0.011 | 0.627            | 0.023 | 0.000          | 0.000 | 0.136             | 0.012 | 0.858                    | 0.010 | 0.253                           | 0.024 | 0.964          | 0.007 |
| 14       | 0.612             | 0.015 | 0.000              | 0.000 | 0.186                      | 0.085 | 0.000                     | 0.000 | 0.371              | 0.127 | 0.793         | 0.020 | 0.117        | 0.019 | 0.616            | 0.037 | 0.000          | 0.000 | 0.138             | 0.022 | 0.814                    | 0.020 | 0.148                           | 0.059 | 0.970          | 0.027 |
| 15       | 0.652             | 0.015 | 0.000              | 0.000 | 0.222                      | 0.050 | 0.000                     | 0.000 | 0.151              | 0.082 | 0.742         | 0.019 | 0.181        | 0.016 | 0.640            | 0.044 | 0.000          | 0.000 | 0.101             | 0.021 | 0.729                    | 0.029 | 0.257                           | 0.060 | 0.945          | 0.019 |
| 16       | 0.721             | 0.017 | 0.000              | 0.000 | 0.308                      | 0.110 | 0.000                     | 0.000 | 0.751              | 0.153 | 0.799         | 0.027 | 0.239        | 0.023 | 0.594            | 0.066 | 0.000          | 0.000 | 0.162             | 0.039 | 0.865                    | 0.040 | 0.298                           | 0.080 | 0.960          | 0.018 |
| 17       | 0.694             | 0.007 | 0.878              | 0.004 | 0.322                      | 0.043 | 0.918                     | 0.002 | 0.273              | 0.035 | 0.793         | 0.010 | 0.208        | 0.015 | 0.630            | 0.019 | 0.531          | 0.011 | 0.117             | 0.009 | 0.000                    | 0.000 | 0.334                           | 0.041 | 0.994          | 0.002 |
| 18       | 0.621             | 0.014 | 0.667              | 0.015 | 0.298                      | 0.039 | 0.830                     | 0.007 | 0.151              | 0.043 | 0.805         | 0.022 | 0.219        | 0.028 | 0.609            | 0.027 | 0.371          | 0.028 | 0.112             | 0.018 | 0.000                    | 0.000 | 0.440                           | 0.113 | 0.971          | 0.012 |
| 19       | 0.673             | 0.016 | 0.816              | 0.013 | 0.241                      | 0.131 | 0.879                     | 0.006 | 0.173              | 0.044 | 0.769         | 0.021 | 0.211        | 0.025 | 0.535            | 0.042 | 0.473          | 0.025 | 0.104             | 0.019 | 0.000                    | 0.000 | 0.279                           | 0.101 | 0.969          | 0.009 |
| 20       | 0.714             | 0.017 | 0.847              | 0.013 | 0.298                      | 0.039 | 0.911                     | 0.006 | 0.151              | 0.061 | 0.785         | 0.032 | 0.288        | 0.033 | 0.631            | 0.051 | 0.555          | 0.031 | 0.164             | 0.027 | 0.000                    | 0.000 | 0.281                           | 0.140 | 0.987          | 0.008 |
| 21       | 0.666             | 0.006 | 0.000              | 0.000 | 0.257                      | 0.013 | 0.000                     | 0.000 | 0.190              | 0.045 | 0.760         | 0.008 | 0.202        | 0.007 | 0.603            | 0.016 | 0.000          | 0.000 | 0.111             | 0.007 | 0.878                    | 0.006 | 0.255                           | 0.016 | 0.954          | 0.009 |
| 22       | 0.579             | 0.013 | 0.000              | 0.000 | 0.178                      | 0.072 | 0.000                     | 0.000 | 0.261              | 0.105 | 0.758         | 0.019 | 0.140        | 0.012 | 0.545            | 0.028 | 0.000          | 0.000 | 0.080             | 0.014 | 0.786                    | 0.014 | 0.148                           | 0.046 | 0.945          | 0.039 |
| 23       | 0.628             | 0.014 | 0.000              | 0.000 | 0.135                      | 0.033 | 0.000                     | 0.000 | 0.203              | 0.081 | 0.717         | 0.018 | 0.170        | 0.013 | 0.541            | 0.037 | 0.000          | 0.000 | 0.078             | 0.015 | 0.777                    | 0.017 | 0.281                           | 0.053 | 0.899          | 0.028 |
| 24       | 0.654             | 0.015 | 0.000              | 0.000 | 0.237                      | 0.082 | 0.000                     | 0.000 | 0.148              | 0.069 | 0.698         | 0.025 | 0.268        | 0.017 | 0.485            | 0.050 | 0.000          | 0.000 | 0.122             | 0.023 | 0.885                    | 0.019 | 0.257                           | 0.061 | 0.967          | 0.022 |
| 25       | 0.610             | 0.005 | 0.799              | 0.006 | 0.182                      | 0.024 | 0.907                     | 0.003 | 0.179              | 0.018 | 0.679         | 0.010 | 0.119        | 0.010 | 0.420            | 0.012 | 0.323          | 0.008 | 0.057             | 0.003 | 0.000                    | 0.000 | 0.231                           | 0.023 | 0.958          | 0.005 |
| 26       | 0.551             | 0.012 | 0.552              | 0.016 | 0.170                      | 0.143 | 0.806                     | 0.008 | 0.217              | 0.043 | 0.709         | 0.024 | 0.097        | 0.020 | 0.407            | 0.022 | 0.210          | 0.021 | 0.059             | 0.009 | 0.000                    | 0.000 | 0.264                           | 0.068 | 0.894          | 0.023 |
| 27       | 0.579             | 0.013 | 0.699              | 0.017 | 0.190                      | 0.073 | 0.858                     | 0.008 | 0.125              | 0.023 | 0.677         | 0.022 | 0.087        | 0.014 | 0.353            | 0.027 | 0.298          | 0.022 | 0.049             | 0.009 | 0.000                    | 0.000 | 0.257                           | 0.060 | 0.889          | 0.020 |
| 28       | 0.599             | 0.013 | 0.735              | 0.020 | 0.180                      | 0.022 | 0.900                     | 0.007 | 0.115              | 0.030 | 0.614         | 0.032 | 0.187        | 0.017 | 0.440            | 0.040 | 0.356          | 0.029 | 0.043             | 0.008 | 0.000                    | 0.000 | 0.187                           | 0.067 | 0.858          | 0.023 |
| 29       | 0.615             | 0.005 | 0.000              | 0.000 | 0.212                      | 0.011 | 0.000                     | 0.000 | 0.134              | 0.025 | 0.680         | 0.008 | 0.119        | 0.007 | 0.402            | 0.011 | 0.000          | 0.000 | 0.075             | 0.004 | 0.717                    | 0.007 | 0.220                           | 0.013 | 0.935          | 0.015 |
| 30       | 0.498             | 0.014 | 0.000              | 0.000 | 0.164                      | 0.069 | 0.000                     | 0.000 | 0.209              | 0.076 | 0.705         | 0.024 | 0.134        | 0.019 | 0.459            | 0.027 | 0.000          | 0.000 | 0.049             | 0.011 | 0.569                    | 0.017 | 0.174                           | 0.052 | 0.810          | 0.068 |
| 31       | 0.544             | 0.013 | 0.000              | 0.000 | 0.155                      | 0.035 | 0.000                     | 0.000 | 0.144              | 0.046 | 0.668         | 0.020 | 0.107        | 0.012 | 0.398            | 0.028 | 0.000          | 0.000 | 0.066             | 0.011 | 0.674                    | 0.017 | 0.141                           | 0.032 | 0.786          | 0.048 |
| 32       | 0.625             | 0.013 | 0.000              | 0.000 | 0.126                      | 0.049 | 0.000                     | 0.000 | 0.263              | 0.071 | 0.653         | 0.026 | 0.182        | 0.014 | 0.431            | 0.037 | 0.000          | 0.000 | 0.080             | 0.013 | 0.733                    | 0.020 | 0.255                           | 0.042 | 0.800          | 0.039 |

**Supplementary Table 5.** Health-related quality of life among US cancer patients aged 20 years or older, by cancer type and phase of care

| Cancer Type                     | Cancer Phase | Health Related Quality of Life | Source                               |
|---------------------------------|--------------|--------------------------------|--------------------------------------|
|                                 |              | mean (SE)                      |                                      |
| Endometrial                     | Overall      | 0.80 (0.14)                    | Naik et al. <sup>31</sup>            |
| Esophageal Adenocarcinoma       | Overall      | 0.69 (0.26)                    | Wildi et al. <sup>32</sup>           |
| Kidney                          | Overall      | 0.78 (0.14)                    | Pickard et al. <sup>33</sup>         |
| Liver                           | Overall      | 0.79 (0.19)                    | Naik et al. <sup>31</sup>            |
| Gallbladder                     | Overall      | 0.79 (0.19)                    | Naik et al. <sup>31</sup>            |
| Stomach (gastric cardia)        | Initial:     | 0.84 (0.25)                    | Zhou et al. <sup>34</sup>            |
|                                 | Continuous:  | 0.86 (0.24)                    |                                      |
|                                 | End of Life: | 0.65 (0.33)                    |                                      |
| Female Breast (post-menopausal) | Initial:     | 0.78 (0.19)                    | Yabroff et al. <sup>35</sup>         |
|                                 | Continuous:  | 0.81 (0.20)                    |                                      |
|                                 | End of Life: | 0.64 (0.16)                    |                                      |
| Pancreas                        | Overall      | 0.65 (0.30)                    | Müller-Nordhorn et al. <sup>36</sup> |
| Multiple myeloma                | Overall      | 0.79 (0.19)                    | Naik et al. <sup>31</sup>            |
| Advanced Prostate               | Initial:     | 0.78 (0.20)                    | Yabroff et al. <sup>35</sup>         |
|                                 | Continuous:  | 0.76 (0.19)                    |                                      |
|                                 | End of Life: | 0.59 (0.15)                    |                                      |
| Thyroid                         | Overall      | 0.85 (0.13)                    | Naik et al. <sup>31</sup>            |
| Ovary                           | Overall      | 0.77 (0.17)                    | Pickard et al. <sup>33</sup>         |
| Colorectal                      | Initial:     | 0.760 (0.19)                   | Färkkilä et al. <sup>37</sup>        |
|                                 | Continuous:  | 0.835 (0.20)                   |                                      |
|                                 | End of Life: | 0.643 (0.26)                   |                                      |

**Supplementary Table 6.** Baseline medical costs, productivity loss, and patient time costs among US cancer patients aged 20 years or older, by cancer type

| Cancer type               | Sex    | Age | Medical costs |            |             | Productivity loss |            |             | Patient time cost |            |             |
|---------------------------|--------|-----|---------------|------------|-------------|-------------------|------------|-------------|-------------------|------------|-------------|
|                           |        |     | Initial       | Continuous | End-of-life | Initial           | Continuous | End-of-life | Initial           | Continuous | End-of-life |
| Esophageal Adenocarcinoma | Female | <65 | 95439         | 6853       | 156417      | 4884              | 3757       | 15027       | 650               | 500        | 2001        |
|                           |        | ≥65 | 79532         | 6853       | 104278      | 6984              | 5372       | 21489       | 1187              | 913        | 3652        |
|                           | Male   | <65 | 95787         | 6450       | 155612      | 4884              | 3757       | 15027       | 650               | 500        | 2001        |
|                           |        | ≥65 | 79822         | 6450       | 103742      | 6984              | 5372       | 21489       | 1187              | 913        | 3652        |
| Stomach (Gastric Cardia)  | Female | <65 | 85291         | 3977       | 155636      | 4884              | 3757       | 15027       | 650               | 500        | 2001        |
|                           |        | ≥65 | 71076         | 3977       | 103758      | 6984              | 5372       | 21489       | 1187              | 913        | 3652        |
|                           | Male   | <65 | 94144         | 4282       | 160695      | 4884              | 3757       | 15027       | 650               | 500        | 2001        |
|                           |        | ≥65 | 78453         | 4282       | 107130      | 6984              | 5372       | 21489       | 1187              | 913        | 3652        |
| Liver                     | Female | <65 | 40173         | 5859       | 95782       | 4884              | 3757       | 15027       | 650               | 500        | 2001        |
|                           |        | ≥65 | 40173         | 5859       | 95782       | 6984              | 5372       | 21489       | 1187              | 913        | 3652        |
|                           | Male   | <65 | 41161         | 7363       | 97473       | 4884              | 3757       | 15027       | 650               | 500        | 2001        |
|                           |        | ≥65 | 41161         | 7363       | 97473       | 6984              | 5372       | 21489       | 1187              | 913        | 3652        |
| Pancreatic                | Female | <65 | 112154        | 8672       | 164911      | 4884              | 3757       | 15027       | 650               | 500        | 2001        |
|                           |        | ≥65 | 93462         | 8672       | 109941      | 6984              | 5372       | 21489       | 1187              | 913        | 3652        |
|                           | Male   | <65 | 112911        | 11697      | 169673      | 4884              | 3757       | 15027       | 650               | 500        | 2001        |
|                           |        | ≥65 | 94092         | 11697      | 113115      | 6984              | 5372       | 21489       | 1187              | 913        | 3652        |
| Advanced Prostate         | Male   | <65 | 23652         | 3201       | 93363       | 3715              | 2858       | 11432       | 650               | 500        | 2001        |
|                           |        | ≥65 | 19710         | 3201       | 62242       | 6549              | 5038       | 20152       | 1187              | 913        | 3652        |
| Colorectal                | Female | <65 | 61593         | 3159       | 126778      | 10330             | 7946       | 31784       | 650               | 500        | 2001        |
|                           |        | ≥65 | 51327         | 3159       | 84519       | 7479              | 5753       | 23012       | 1187              | 913        | 3652        |

|    |                         |        |     |       |      |        |       |      |       |      |     |      |
|----|-------------------------|--------|-----|-------|------|--------|-------|------|-------|------|-----|------|
| 1  |                         |        |     |       |      |        |       |      |       |      |     |      |
| 2  |                         | Male   | <65 | 62174 | 4595 | 128507 | 10330 | 7946 | 31784 | 650  | 500 | 2001 |
| 3  |                         |        | ≥65 | 51812 | 4595 | 85671  | 7479  | 5753 | 23012 | 1187 | 913 | 3652 |
| 4  |                         |        |     |       |      |        |       |      |       |      |     |      |
| 5  |                         |        |     |       |      |        |       |      |       |      |     |      |
| 6  | Endometrial             | Female | <65 | 32129 | 1535 | 105262 | 4884  | 3757 | 15027 | 650  | 500 | 2001 |
| 7  |                         |        | ≥65 | 26775 | 1535 | 70175  | 6984  | 5372 | 21489 | 1187 | 913 | 3652 |
| 8  |                         |        |     |       |      |        |       |      |       |      |     |      |
| 9  |                         |        |     |       |      |        |       |      |       |      |     |      |
| 10 | Ovarian                 | Female | <65 | 98788 | 8296 | 149573 | 4884  | 3757 | 15027 | 650  | 500 | 2001 |
| 11 |                         |        | ≥65 | 82324 | 8296 | 99715  | 6984  | 5372 | 21489 | 1187 | 913 | 3652 |
| 12 |                         |        |     |       |      |        |       |      |       |      |     |      |
| 13 |                         |        |     |       |      |        |       |      |       |      |     |      |
| 14 | Gallbladder             | Female | <65 | 40173 | 5859 | 95782  | 4884  | 3757 | 15027 | 650  | 500 | 2001 |
| 15 |                         |        | ≥65 | 40173 | 5859 | 95782  | 6984  | 5372 | 21489 | 1187 | 913 | 3652 |
| 16 |                         | Male   | <65 | 41161 | 7363 | 97473  | 4884  | 3757 | 15027 | 650  | 500 | 2001 |
| 17 |                         |        | ≥65 | 41161 | 7363 | 97473  | 6984  | 5372 | 21489 | 1187 | 913 | 3652 |
| 18 |                         |        |     |       |      |        |       |      |       |      |     |      |
| 19 |                         |        |     |       |      |        |       |      |       |      |     |      |
| 20 |                         |        |     |       |      |        |       |      |       |      |     |      |
| 21 | Kidney (Renal Cell)     | Female | <65 | 46077 | 6255 | 110765 | 4884  | 3757 | 15027 | 650  | 500 | 2001 |
| 22 |                         |        | ≥65 | 38397 | 6255 | 73843  | 6984  | 5372 | 21489 | 1187 | 913 | 3652 |
| 23 |                         | Male   | <65 | 46048 | 6018 | 117123 | 4884  | 3757 | 15027 | 650  | 500 | 2001 |
| 24 |                         |        | ≥65 | 38374 | 6018 | 78082  | 6984  | 5372 | 21489 | 1187 | 913 | 3652 |
| 25 |                         |        |     |       |      |        |       |      |       |      |     |      |
| 26 |                         |        |     |       |      |        |       |      |       |      |     |      |
| 27 |                         |        |     |       |      |        |       |      |       |      |     |      |
| 28 | Breast (Postmenopausal) | Female | <65 | 27693 | 2207 | 94284  | 5985  | 4604 | 18416 | 650  | 500 | 2001 |
| 29 |                         |        | ≥65 | 23078 | 2207 | 62856  | 4752  | 3655 | 14620 | 1187 | 913 | 3652 |
| 30 |                         |        |     |       |      |        |       |      |       |      |     |      |
| 31 |                         |        |     |       |      |        |       |      |       |      |     |      |
| 32 | Thyroid                 | Female | <65 | 40173 | 5859 | 95782  | 4884  | 3757 | 15027 | 650  | 500 | 2001 |
| 33 |                         |        | ≥65 | 40173 | 5859 | 95782  | 6984  | 5372 | 21489 | 1187 | 913 | 3652 |
| 34 |                         | Male   | <65 | 41161 | 7363 | 97473  | 4884  | 3757 | 15027 | 650  | 500 | 2001 |
| 35 |                         |        | ≥65 | 41161 | 7363 | 97473  | 6984  | 5372 | 21489 | 1187 | 913 | 3652 |
| 36 |                         |        |     |       |      |        |       |      |       |      |     |      |
| 37 |                         |        |     |       |      |        |       |      |       |      |     |      |
| 38 |                         |        |     |       |      |        |       |      |       |      |     |      |
| 39 | Multiple Myeloma        | Female | <65 | 40173 | 5859 | 95782  | 4884  | 3757 | 15027 | 650  | 500 | 2001 |
| 40 |                         |        | ≥65 | 40173 | 5859 | 95782  | 6984  | 5372 | 21489 | 1187 | 913 | 3652 |
| 41 |                         |        |     |       |      |        |       |      |       |      |     |      |
| 42 |                         |        |     |       |      |        |       |      |       |      |     |      |
| 43 |                         |        |     |       |      |        |       |      |       |      |     |      |
| 44 |                         |        |     |       |      |        |       |      |       |      |     |      |
| 45 |                         |        |     |       |      |        |       |      |       |      |     |      |
| 46 |                         |        |     |       |      |        |       |      |       |      |     |      |
| 47 |                         |        |     |       |      |        |       |      |       |      |     |      |

|   |       |     |       |      |       |      |      |       |      |     |      |
|---|-------|-----|-------|------|-------|------|------|-------|------|-----|------|
| 1 |       |     |       |      |       |      |      |       |      |     |      |
| 2 | Male  | <65 | 41161 | 7363 | 97473 | 4884 | 3757 | 15027 | 650  | 500 | 2001 |
| 3 |       | ≥65 | 41161 | 7363 | 97473 | 6984 | 5372 | 21489 | 1187 | 913 | 3652 |
| 4 | <hr/> |     |       |      |       |      |      |       |      |     |      |

For peer review only

1  
2  
3  
4  
5  
6  
7  
8  
9  
10  
11  
12  
13  
14  
15  
16  
17  
18  
19  
20  
21  
22  
23  
24  
25  
26  
27  
28  
29  
30  
31  
32  
33  
34  
35  
36  
37  
38  
39  
40  
41  
42  
43  
44  
45  
46  
47

**Supplementary Table 7.** Baseline medical costs, productivity loss, and patient time cost among general population aged 20 years or older in the US, by 32 subgroups

| Age group, years | Sex    | Race/ethnicity | Medical costs        |                   | Productivity loss    |                   | Patient time cost    |                   |
|------------------|--------|----------------|----------------------|-------------------|----------------------|-------------------|----------------------|-------------------|
|                  |        |                | Annual general costs | End-of-life costs | Annual general costs | End-of-life costs | Annual general costs | End-of-life costs |
| 20-44            | Female | NHW            | 4020                 | 40000             | 2040                 | 8160              | 226                  | 904               |
|                  |        | NHB            | 3100                 | 40000             | 2040                 | 8160              | 226                  | 904               |
|                  |        | Hispanic       | 2355                 | 40000             | 2040                 | 8160              | 226                  | 904               |
|                  |        | Other          | 2617                 | 40000             | 2040                 | 8160              | 226                  | 904               |
|                  | Male   | NHW            | 2022                 | 40000             | 2040                 | 8160              | 226                  | 904               |
|                  |        | NHB            | 2279                 | 40000             | 2040                 | 8160              | 226                  | 904               |
|                  |        | Hispanic       | 1145                 | 40000             | 2040                 | 8160              | 226                  | 904               |
|                  |        | Other          | 1803                 | 40000             | 2040                 | 8160              | 226                  | 904               |
| 45-54            | Female | NHW            | 5371                 | 40000             | 2040                 | 8160              | 226                  | 904               |
|                  |        | NHB            | 5712                 | 40000             | 2040                 | 8160              | 226                  | 904               |
|                  |        | Hispanic       | 3196                 | 40000             | 2040                 | 8160              | 226                  | 904               |
|                  |        | Other          | 4082                 | 40000             | 2040                 | 8160              | 226                  | 904               |
|                  | Male   | NHW            | 3812                 | 40000             | 2040                 | 8160              | 226                  | 904               |
|                  |        | NHB            | 3639                 | 40000             | 2040                 | 8160              | 226                  | 904               |
|                  |        | Hispanic       | 3612                 | 40000             | 2040                 | 8160              | 226                  | 904               |
|                  |        | Other          | 2560                 | 40000             | 2040                 | 8160              | 226                  | 904               |
| 55-64            | Female | NHW            | 7300                 | 40000             | 2040                 | 8160              | 226                  | 904               |
|                  |        | NHB            | 5479                 | 40000             | 2040                 | 8160              | 226                  | 904               |
|                  |        | Hispanic       | 4607                 | 40000             | 2040                 | 8160              | 226                  | 904               |
|                  |        | Other          | 3951                 | 40000             | 2040                 | 8160              | 226                  | 904               |
|                  | Male   | NHW            | 6519                 | 40000             | 2040                 | 8160              | 226                  | 904               |
|                  |        | NHB            | 6455                 | 40000             | 2040                 | 8160              | 226                  | 904               |
|                  |        | Hispanic       | 5077                 | 40000             | 2040                 | 8160              | 226                  | 904               |
|                  |        | Other          | 6320                 | 40000             | 2040                 | 8160              | 226                  | 904               |
| ≥65              | Female | NHW            | 8997                 | 40000             | 4409                 | 8160              | 607                  | 904               |
|                  |        | NHB            | 9585                 | 40000             | 4409                 | 8160              | 607                  | 904               |
|                  |        | Hispanic       | 8847                 | 40000             | 4409                 | 8160              | 607                  | 904               |
|                  |        | Other          | 8625                 | 40000             | 4409                 | 8160              | 607                  | 904               |
|                  | Male   | NHW            | 9334                 | 40000             | 4409                 | 8160              | 607                  | 904               |
|                  |        | NHB            | 7367                 | 40000             | 4409                 | 8160              | 607                  | 904               |
|                  |        | Hispanic       | 5640                 | 40000             | 4409                 | 8160              | 607                  | 904               |
|                  |        | Other          | 7461                 | 40000             | 4409                 | 8160              | 607                  | 904               |



**Supplementary Table 8.** Characteristics of US adults aged 20 years or older participated in the NHANES, 2013-2016

| Characteristics<br>(N=10064)                   | Calorie Consumption, kcal/day |
|------------------------------------------------|-------------------------------|
| <b>Age, years</b>                              | 47.8 ± 0.41                   |
| <b>Age groups, years, N (%)</b>                |                               |
| 20-44                                          | 4319 (44.5)      425 ± 4.38   |
| 25-54                                          | 1704 (18.3)      315 ± 5.39   |
| 55-64                                          | 1725 (17.3)      271 ± 4.90   |
| ≥65                                            | 2316 (19.9)      192 ± 3.83   |
| <b>Sex, N (%)</b>                              |                               |
| Male                                           | 4829 (48.3)      388 ± 4.53   |
| Female                                         | 5235 (51.7)      279 ± 4.04   |
| <b>Race/ethnicity, N (%)</b>                   |                               |
| Non-Hispanic White                             | 3944 (65.0)      320 ± 4.76   |
| Non-Hispanic Black                             | 2069 (11.2)      361 ± 6.55   |
| Hispanic                                       | 2668 (14.9)      367 ± 4.44   |
| Other                                          | 1383 (8.90)      325 ± 8.12   |
| <b>Education, N (%)</b>                        |                               |
| Less than high school graduate                 | 2178 (14.2)      311 ± 5.14   |
| High school graduate                           | 2249 (21.6)      332 ± 5.72   |
| Some college                                   | 3070 (33.1)      341 ± 4.92   |
| College graduate                               | 2562 (31.0)      332 ± 7.10   |
| <b>Family income to poverty ratio, N (%)</b>   |                               |
| <1.30                                          | 3862 (28.3)      325 ± 4.87   |
| 1.30-1.84                                      | 2842 (26.7)      333 ± 4.55   |
| 1.85-2.99                                      | 1725 (20.4)      344 ± 6.73   |
| ≥3.00                                          | 1635 (24.5)      328 ± 7.01   |
| <b>Body mass index (BMI), kg/m<sup>2</sup></b> | 29.3 ± 0.16                   |
| <b>Weight status, N (%)</b>                    |                               |
| Underweight (BMI<18.5)                         | 145 (1.36)      341 ± 17.5    |
| Normal weight (BMI=18.5-24.9)                  | 2671 (27.2)      327 ± 4.81   |
| Overweight/Obese (BMI≥25)                      | 7163 (71.4)      334 ± 4.01   |

**Supplementary Table 9.** Consumption of calories from full-service and fast-food restaurants among US adults participated in 2013-2016 NHANES by 32 subgroups

| Age group, years | Sex    | Race/ethnicity | Baseline consumption, g/day<br>(mean ± SE) |
|------------------|--------|----------------|--------------------------------------------|
| 20-44            | Female | NHW            | 357 ± 6.47                                 |
|                  |        | NHB            | 397 ± 8.98                                 |
|                  |        | Hispanic       | 364 ± 6.77                                 |
|                  |        | Other          | 334 ± 11.3                                 |
|                  | Male   | NHW            | 485 ± 9.00                                 |
|                  |        | NHB            | 508 ± 12.3                                 |
|                  |        | Hispanic       | 500 ± 13.7                                 |
|                  |        | Other          | 466 ± 14.1                                 |
| 45-54            | Female | NHW            | 270 ± 9.38                                 |
|                  |        | NHB            | 266 ± 7.85                                 |
|                  |        | Hispanic       | 265 ± 9.11                                 |
|                  |        | Other          | 228 ± 14.6                                 |
|                  | Male   | NHW            | 374 ± 11.3                                 |
|                  |        | NHB            | 388 ± 17.4                                 |
|                  |        | Hispanic       | 355 ± 15.0                                 |
|                  |        | Other          | 338 ± 20.2                                 |
| 55-64            | Female | NHW            | 231 ± 5.25                                 |
|                  |        | NHB            | 249 ± 9.58                                 |
|                  |        | Hispanic       | 234 ± 7.99                                 |
|                  |        | Other          | 216 ± 10.2                                 |
|                  | Male   | NHW            | 315 ± 9.55                                 |
|                  |        | NHB            | 314 ± 18.3                                 |
|                  |        | Hispanic       | 307 ± 9.90                                 |
|                  |        | Other          | 298 ± 11.1                                 |
| ≥65              | Female | NHW            | 164 ± 4.71                                 |
|                  |        | NHB            | 156 ± 6.07                                 |
|                  |        | Hispanic       | 158 ± 5.27                                 |
|                  |        | Other          | 137 ± 5.43                                 |
|                  | Male   | NHW            | 235 ± 7.43                                 |
|                  |        | NHB            | 220 ± 7.07                                 |
|                  |        | Hispanic       | 218 ± 8.07                                 |
|                  |        | Other          | 198 ± 20.0                                 |

**Supplementary Table 10.** Estimated new cancer cases averted by the federal menu calorie labeling in the US by age, sex, race/ethnicity, and cancer type, over lifetime (U.S. population=235,162,844)<sup>1</sup>

| Cancer Type                    | Policy Scenario           | 20-44 y                |      | 45-54 y                 |      | 55-64 y               |      | 65 + y               |      |  |
|--------------------------------|---------------------------|------------------------|------|-------------------------|------|-----------------------|------|----------------------|------|--|
|                                |                           | Female                 | Male | Female                  | Male | Female                | Male | Female               | Male |  |
| <b>Endometrial</b>             |                           |                        |      |                         |      |                       |      |                      |      |  |
| Age                            | <i>consumer behavior</i>  | 3300 (696 to 6090)     |      | 591 (-990 to 2160)      |      | 1140 (433 to 1940)    |      | 656 (107 to 1190)    |      |  |
|                                | <i>+industry response</i> | 5960 (3360 to 8890)    |      | 1340 (-208 to 2980)     |      | 1600 (928 to 2430)    |      | 926 (396 to 1460)    |      |  |
| Race/Ethnicity                 |                           |                        |      |                         |      |                       |      |                      |      |  |
| Non-Hispanic White             | <i>consumer behavior</i>  | 1630<br>(-711 to 4080) | 0    | -136<br>(-1590 to 1430) | 0    | 757<br>(140 to 1500)  | 0    | 572<br>(38 to 1070)  | 0    |  |
|                                | <i>+industry response</i> | 3080<br>(829 to 5780)  | 0    | 369<br>(-1100 to 1950)  | 0    | 1110<br>(463 to 1830) | 0    | 780<br>(245 to 1290) | 0    |  |
| Non-Hispanic Black             | <i>consumer behavior</i>  | 763<br>(-157 to 1710)  | 0    | 258<br>(-23 to 543)     | 0    | 283<br>(73 to 528)    | 0    | 47<br>(-43 to 150)   | 0    |  |
|                                | <i>+industry response</i> | 1240<br>(316 to 2200)  | 0    | 372<br>(93 to 668)      | 0    | 355<br>(146 to 604)   | 0    | 77<br>(-13 to 176)   | 0    |  |
| Hispanic                       | <i>consumer behavior</i>  | 910<br>(74 to 1790)    | 0    | 290<br>(-48 to 596)     | 0    | 42<br>(-83 to 185)    | 0    | 43<br>(-16 to 102)   | 0    |  |
|                                | <i>+industry response</i> | 1460<br>(580 to 2340)  | 0    | 399<br>(66 to 703)      | 0    | 89<br>(-35 to 233)    | 0    | 64<br>(5 to 122)     | 0    |  |
| Other                          | <i>consumer behavior</i>  | 19<br>(-312 to 402)    | 0    | 165<br>(41 to 319)      | 0    | 54<br>(3 to 109)      | 0    | -6<br>(-26 to 14)    | 0    |  |
|                                | <i>+industry response</i> | 150<br>(-174 to 546)   | 0    | 191<br>(68 to 344)      | 0    | 68<br>(18 to 124)     | 0    | 0<br>(-21 to 21)     | 0    |  |
| <b>Breast (Postmenopausal)</b> |                           |                        |      |                         |      |                       |      |                      |      |  |
| Age                            | <i>consumer behavior</i>  | 2530 (263 to 5040)     |      | 373 (-1070 to 1950)     |      | 1210 (480 to 2130)    |      | 742 (137 to 1380)    |      |  |
|                                | <i>+industry response</i> | 4670 (2330 to 7350)    |      | 1040 (-390 to 2680)     |      | 1710 (1010 to 2640)   |      | 1040 (433 to 1700)   |      |  |
| Race/Ethnicity                 |                           |                        |      |                         |      |                       |      |                      |      |  |
| Non-Hispanic White             | <i>consumer behavior</i>  | 1370<br>(-659 to 3750) | 0    | -224<br>(-1570 to 1210) | 0    | 832<br>(170 to 1670)  | 0    | 660<br>(57 to 1280)  | 0    |  |
|                                | <i>+industry response</i> | 2660<br>(490 to 5220)  | 0    | 234<br>(-1130 to 1770)  | 0    | 1200<br>(535 to 2040) | 0    | 902<br>(291 to 1570) | 0    |  |
| Non-Hispanic Black             | <i>consumer behavior</i>  | 567<br>(-110 to 1300)  | 0    | 182<br>(-34 to 431)     | 0    | 267<br>(89 to 487)    | 0    | 43<br>(-40 to 136)   | 0    |  |

|    |                            |                           |                           |                        |                      |                       |                      |                      |                     |                      |
|----|----------------------------|---------------------------|---------------------------|------------------------|----------------------|-----------------------|----------------------|----------------------|---------------------|----------------------|
| 1  |                            | <i>+industry response</i> | 912<br>(240 to 1680)      | 0                      | 271<br>(55 to 536)   | 0                     | 329<br>(149 to 554)  | 0                    | 71<br>(-13 to 166)  | 0                    |
| 2  | Hispanic                   | <i>consumer behavior</i>  | 581<br>(44 to 1200)       | 0                      | 231<br>(-14 to 474)  | 0                     | 32.9<br>(-72 to 154) | 0                    | 42<br>(-12 to 100)  | 0                    |
| 3  |                            | <i>+industry response</i> | 934<br>(368 to 1600)      | 0                      | 312<br>(71 to 563)   | 0                     | 76<br>(-34 to 198)   | 0                    | 61<br>(6 to 123)    | 0                    |
| 4  |                            | <i>consumer behavior</i>  | 1<br>(-310 to 384)        | 0                      | 182<br>(40 to 353)   | 0                     | 74<br>(9 to 148)     | 0                    | -7<br>(-35 to 22)   | 0                    |
| 5  | Other                      | <i>+industry response</i> | 128<br>(-187 to 541)      | 0                      | 210<br>(71 to 386)   | 0                     | 94<br>(29 to 170)    | 0                    | 1<br>(-27 to 31)    | 0                    |
| 6  |                            | <i>consumer behavior</i>  |                           |                        |                      |                       |                      |                      |                     |                      |
| 7  |                            | <i>+industry response</i> |                           |                        |                      |                       |                      |                      |                     |                      |
| 8  |                            |                           |                           |                        |                      |                       |                      |                      |                     |                      |
| 9  |                            |                           |                           |                        |                      |                       |                      |                      |                     |                      |
| 10 |                            |                           |                           |                        |                      |                       |                      |                      |                     |                      |
| 11 | <b>Kidney (Renal Cell)</b> |                           |                           |                        |                      |                       |                      |                      |                     |                      |
| 12 |                            |                           |                           |                        |                      |                       |                      |                      |                     |                      |
| 13 | Age                        | <i>consumer behavior</i>  | 2930 (864 to 5040)        |                        | 581 (-364 to 1540)   |                       | 1180 (526 to 1810)   |                      | 428 (28 to 805)     |                      |
| 14 |                            | <i>+industry response</i> | 5240 (3110 to 7390)       |                        | 1230 (244 to 2210)   |                       | 1590 (941 to 2250)   |                      | 651 (248 to 1030)   |                      |
| 15 |                            |                           |                           |                        |                      |                       |                      |                      |                     |                      |
| 16 | Race/Ethnicity             |                           |                           |                        |                      |                       |                      |                      |                     |                      |
| 17 |                            | Non-                      |                           |                        |                      |                       |                      |                      |                     |                      |
| 18 | Hispanic White             | <i>consumer behavior</i>  | 338<br>(-137 to 844)      | 1040<br>(-536 to 2790) | -42<br>(-332 to 273) | 53<br>(-791 to 884)   | 172<br>(34 to 339)   | 677<br>(88 to 1240)  | 147<br>(18 to 280)  | 192<br>(-170 to 536) |
| 19 |                            | <i>+industry response</i> | 646<br>(173 to 1180)      | 2020<br>(410 to 3750)  | 58<br>(-236 to 383)  | 379<br>(-452 to 1250) | 251<br>(109 to 420)  | 898<br>(326 to 1470) | 199<br>(72 to 335)  | 320<br>(-35 to 661)  |
| 20 | Non-                       | <i>consumer behavior</i>  | 170<br>(-35 to 384)       | 88<br>(-454 to 620)    | 60<br>(-5 to 128)    | 136<br>(-96 to 410)   | 79<br>(26 to 139)    | 85<br>(-81 to 258)   | 13<br>(-12 to 40)   | 44<br>(9 to 79)      |
| 21 |                            | Hispanic Black            | <i>+industry response</i> | 280<br>(69 to 502)     | 343<br>(-202 to 898) | 87<br>(22 to 157)     | 203<br>(-30 to 475)  | 97<br>(43 to 157)    | 119<br>(-45 to 295) | 21<br>(-4 to 48)     |
| 22 | Hispanic                   | <i>consumer behavior</i>  | 267<br>(21 to 527)        | 895<br>(-21 to 1920)   | 92<br>(-4 to 184)    | 230<br>(-25 to 503)   | 14<br>(-27 to 60)    | 94<br>(8 to 196)     | 15<br>(-6 to 36)    | 9<br>(-29 to 50)     |
| 23 |                            | <i>+industry response</i> | 425<br>(166 to 697)       | 1290<br>(371 to 2320)  | 123<br>(27 to 218)   | 305<br>(49 to 570)    | 29<br>(-12 to 76)    | 127<br>(41 to 232)   | 22<br>(2 to 44)     | 21<br>(-17 to 63)    |
| 24 | Other                      | <i>consumer behavior</i>  | 5<br>(-47 to 66)          | 75<br>(-103 to 274)    | 34<br>(12 to 59)     | 3<br>(-64 to 77)      | 13<br>(2 to 25)      | 33<br>(10 to 58)     | -1<br>(-6 to 4)     | 8<br>(-18 to 37)     |
| 25 |                            | <i>+industry response</i> | 27<br>(-26 to 89)         | 147<br>(-29 to 347)    | 38<br>(17 to 64)     | 17<br>(-52 to 91)     | 16<br>(5 to 28)      | 41<br>(19 to 67)     | 1<br>(-4 to 6)      | 11<br>(-15 to 40)    |
| 26 |                            |                           |                           |                        |                      |                       |                      |                      |                     |                      |
| 27 |                            |                           |                           |                        |                      |                       |                      |                      |                     |                      |
| 28 |                            |                           |                           |                        |                      |                       |                      |                      |                     |                      |
| 29 |                            |                           |                           |                        |                      |                       |                      |                      |                     |                      |
| 30 |                            |                           |                           |                        |                      |                       |                      |                      |                     |                      |
| 31 |                            |                           |                           |                        |                      |                       |                      |                      |                     |                      |
| 32 |                            |                           |                           |                        |                      |                       |                      |                      |                     |                      |
| 33 |                            |                           |                           |                        |                      |                       |                      |                      |                     |                      |
| 34 |                            |                           |                           |                        |                      |                       |                      |                      |                     |                      |
| 35 | <b>Liver</b>               |                           |                           |                        |                      |                       |                      |                      |                     |                      |
| 36 | Age                        | <i>consumer behavior</i>  | 3210 (1000 to 5540)       |                        | 701 (-200 to 1760)   |                       | 1000 (477 to 1580)   |                      | 275 (17 to 551)     |                      |
| 37 |                            | <i>+industry response</i> | 5560 (3130 to 8130)       |                        | 1340 (397 to 2480)   |                       | 1340 (804 to 1950)   |                      | 432 (174 to 719)    |                      |
| 38 |                            |                           |                           |                        |                      |                       |                      |                      |                     |                      |
| 39 | Race/Ethnicity             |                           |                           |                        |                      |                       |                      |                      |                     |                      |
| 40 |                            |                           |                           |                        |                      |                       |                      |                      |                     |                      |
| 41 |                            |                           |                           |                        |                      |                       |                      |                      |                     |                      |
| 42 |                            |                           |                           |                        |                      |                       |                      |                      |                     |                      |
| 43 |                            |                           |                           |                        |                      |                       |                      |                      |                     |                      |
| 44 |                            |                           |                           |                        |                      |                       |                      |                      |                     |                      |
| 45 |                            |                           |                           |                        |                      |                       |                      |                      |                     |                      |
| 46 |                            |                           |                           |                        |                      |                       |                      |                      |                     |                      |
| 47 |                            |                           |                           |                        |                      |                       |                      |                      |                     |                      |

|    |                    |                           |                    |                |                    |                |                  |               |                 |               |
|----|--------------------|---------------------------|--------------------|----------------|--------------------|----------------|------------------|---------------|-----------------|---------------|
| 1  | Non-Hispanic       | <i>consumer behavior</i>  | 170                | 1150           | 18                 | -82            | 113              | 520           | 75              | 116           |
| 2  | White              |                           | (-125 to 597)      | (-258 to 3130) | (-168 to 236)      | (-844 to 807)  | (36 to 227)      | (108 to 1020) | (6 to 155)      | (-110 to 365) |
| 3  |                    | <i>+industry response</i> | 367                | 2120           | 78                 | 215            | 159              | 668           | 100             | 198           |
| 4  |                    |                           | (53 to 855)        | (498 to 4300)  | (-105 to 319)      | (-537 to 1150) | (77 to 280)      | (287 to 1220) | (35 to 189)     | (-26 to 454)  |
| 5  | Non-Hispanic Black | <i>consumer behavior</i>  | 143                | 85             | 53                 | 213            | 51               | 118           | 7               | 37            |
| 6  |                    |                           | (-27 to 346)       | (-678 to 1050) | (2 to 120)         | (-146 to 705)  | (14 to 100)      | (-112 to 393) | (-7 to 26)      | (-4 to 88)    |
| 7  |                    | <i>+industry response</i> | 231                | 429            | 74                 | 306            | 63               | 163           | 12              | 52            |
| 8  |                    |                           | (53 to 458)        | (-312 to 1460) | (24 to 147)        | (-41 to 823)   | (28 to 115)      | (-58 to 447)  | (-2 to 32)      | (11 to 107)   |
| 9  | Hispanic           | <i>consumer behavior</i>  | 239                | 1150           | 99                 | 321            | 14               | 113           | 17              | 8             |
| 10 |                    |                           | (19 to 570)        | (93 to 2490)   | (3 to 215)         | (15 to 703)    | (-30 to 72)      | (19 to 233)   | (-5 to 41)      | (-33 to 54)   |
| 11 |                    | <i>+industry response</i> | 384                | 1600           | 132                | 409            | 31               | 150           | 25              | 20            |
| 12 |                    |                           | (132 to 756)       | (529 to 3050)  | (36 to 257)        | (106 to 820)   | (-13 to 90)      | (55 to 276)   | (3 to 50)       | (-19 to 70)   |
| 13 | Other              | <i>consumer behavior</i>  | 2                  | 99             | 38                 | -1             | 15               | 38            | 0               | 9             |
| 14 |                    |                           | (-56 to 82)        | (-125 to 379)  | (9 to 77)          | (-101 to 125)  | (0 to 34)        | (5 to 76)     | (-8 to 7)       | (-28 to 53)   |
| 15 |                    | <i>+industry response</i> | 26                 | 183            | 43                 | 18             | 19               | 48            | 2               | 14            |
| 16 |                    |                           | (-32 to 108)       | (-31 to 483)   | (15 to 85)         | (-80 to 152)   | (5 to 40)        | (17 to 91)    | (-5 to 10)      | (-23 to 59)   |
| 17 | <b>Pancreatic</b>  |                           |                    |                |                    |                |                  |               |                 |               |
| 18 | Age                | <i>consumer behavior</i>  | 764 (262 to 1340)  |                | 81.6 (-186 to 388) |                | 404 (193 to 651) |               | 148 (21 to 286) |               |
| 19 |                    | <i>+industry response</i> | 1350 (820 to 1990) |                | 269 (4 to 595)     |                | 540 (327 to 793) |               | 227 (96 to 370) |               |
| 20 | Race/Ethnicity     |                           |                    |                |                    |                |                  |               |                 |               |
| 21 | Non-Hispanic White | <i>consumer behavior</i>  | 121                | 247            | -48                | -16            | 87               | 218           | 63              | 58            |
| 22 |                    |                           | (-44 to 367)       | (-120 to 768)  | (-159 to 87)       | (-246 to 245)  | (26 to 175)      | (48 to 432)   | (3 to 131)      | (-54 to 189)  |
| 23 |                    | <i>+industry response</i> | 229                | 490            | -11                | 73             | 122              | 283           | 87              | 98            |
| 24 |                    |                           | (50 to 493)        | (99 to 1060)   | (-124 to 134)      | (-154 to 363)  | (56 to 218)      | (115 to 507)  | (27 to 163)     | (-12 to 238)  |
| 25 | Non-Hispanic Black | <i>consumer behavior</i>  | 60                 | 18             | 24                 | 30             | 32               | 19            | 5               | 10            |
| 26 |                    |                           | (-10 to 158)       | (-80 to 128)   | (-1 to 54)         | (-20 to 87)    | (9 to 63)        | (-16 to 62)   | (-6 to 19)      | (2 to 19)     |
| 27 |                    | <i>+industry response</i> | 98                 | 64             | 34                 | 44             | 39               | 27            | 9               | 13            |
| 28 |                    |                           | (21 to 207)        | (-36 to 184)   | (9 to 67)          | (-4 to 102)    | (17 to 72)       | (-9 to 70)    | (-2 to 23)      | (5 to 23)     |
| 29 | Hispanic           | <i>consumer behavior</i>  | 68                 | 194            | 26                 | 46             | 4                | 18            | 6               | 2             |
| 30 |                    |                           | (5 to 150)         | (13 to 422)    | (-4 to 60)         | (-5 to 105)    | (-11 to 22)      | (-3 to 44)    | (-2 to 14)      | (-8 to 12)    |
| 31 |                    | <i>+industry response</i> | 108                | 273            | 36                 | 63             | 10               | 26            | 8               | 5             |
| 32 |                    |                           | (40 to 201)        | (92 to 518)    | (7 to 70)          | (11 to 124)    | (-5 to 28)       | (6 to 53)     | (0 to 18)       | (-5 to 15)    |
| 33 | Other              | <i>consumer behavior</i>  | -2                 | 18             | 17                 | 0              | 8                | 10            | 0               | 2             |
| 34 |                    |                           | (-27 to 30)        | (-29 to 72)    | (4 to 33)          | (-20 to 23)    | (1 to 16)        | (3 to 19)     | (-4 to 3)       | (-6 to 13)    |
| 35 |                    | <i>+industry response</i> | 9                  | 36             | 19                 | 4              | 10               | 13            | 1               | 4             |
| 36 |                    |                           | (-17 to 43)        | (-9 to 94)     | (7 to 36)          | (-16 to 28)    | (3 to 18)        | (5 to 22)     | (-3 to 5)       | (-5 to 14)    |
| 37 |                    |                           |                    |                |                    |                |                  |               |                 |               |
| 38 |                    |                           |                    |                |                    |                |                  |               |                 |               |
| 39 |                    |                           |                    |                |                    |                |                  |               |                 |               |
| 40 |                    |                           |                    |                |                    |                |                  |               |                 |               |
| 41 |                    |                           |                    |                |                    |                |                  |               |                 |               |
| 42 |                    |                           |                    |                |                    |                |                  |               |                 |               |
| 43 |                    |                           |                    |                |                    |                |                  |               |                 |               |
| 44 |                    |                           |                    |                |                    |                |                  |               |                 |               |
| 45 |                    |                           |                    |                |                    |                |                  |               |                 |               |
| 46 |                    |                           |                    |                |                    |                |                  |               |                 |               |
| 47 |                    |                           |                    |                |                    |                |                  |               |                 |               |

**Esophageal Adenocarcinoma**

|    |                    |                           |                    |                    |                  |                   |               |                  |               |                  |
|----|--------------------|---------------------------|--------------------|--------------------|------------------|-------------------|---------------|------------------|---------------|------------------|
| 3  | Age                | <i>consumer behavior</i>  | 715 (43 to 1480)   | 92 (-296 to 501)   | 419 (136 to 719) | 128 (-60 to 309)  |               |                  |               |                  |
| 5  |                    | <i>+industry response</i> | 1300 (602 to 2100) | 293 (-102 to 708)  | 556 (270 to 858) | 206 (20 to 390)   |               |                  |               |                  |
| 7  | Race/Ethnicity     |                           |                    |                    |                  |                   |               |                  |               |                  |
| 8  | Non-Hispanic White | <i>consumer behavior</i>  | 45 (-25 to 125)    | 406 (-228 to 1100) | -9 (-55 to 41)   | 26 (-368 to 419)  | 30 (7 to 58)  | 345 (64 to 630)  | 27 (5 to 50)  | 92 (-88 to 263)  |
| 10 |                    | <i>+industry response</i> | 91 (17 to 179)     | 815 (174 to 1560)  | 7 (-40 to 60)    | 179 (-210 to 578) | 43 (20 to 73) | 449 (174 to 739) | 35 (14 to 59) | 155 (-17 to 330) |
| 11 | Non-Hispanic Black | <i>consumer behavior</i>  | 10 (-2 to 22)      | 10 (-28 to 50)     | 3 (-1 to 8)      | 11 (-7 to 32)     | 5 (2 to 9)    | 67 (-7 to 22)    | 1 (-1 to 3)   | 4 (0 to 7)       |
| 13 |                    | <i>+industry response</i> | 16 (4 to 29)       | 28 (-11 to 69)     | 5 (1 to 9)       | 16 (-2 to 37)     | 6 (3 to 11)   | 9 (-4 to 25)     | 1 (0 to 3)    | 5 (2 to 8)       |
| 14 | Hispanic           | <i>consumer behavior</i>  | 28 (2 to 57)       | 196 (-2 to 414)    | 9 (-1 to 20)     | 46 (-7 to 112)    | 2 (-3 to 8)   | 24 (3 to 47)     | 2 (-1 to 4)   | 2 (-7 to 12)     |
| 16 |                    | <i>+industry response</i> | 44 (17 to 76)      | 280 (80 to 504)    | 13 (2 to 24)     | 63 (7 to 130)     | 3 (-1 to 10)  | 32 (11 to 56)    | 3 (0 to 5)    | 4 (-4 to 15)     |
| 17 | Other              | <i>consumer behavior</i>  | -1 (-10 to 11)     | 10 (-16 to 41)     | 6 (1 to 11)      | 0 (-12 to 13)     | 2 (0 to 5)    | 7 (2 to 12)      | 0 (-1 to 1)   | 2 (-4 to 8)      |
| 19 |                    | <i>+industry response</i> | 3 (-6 to 15)       | 21 (-6 to 52)      | 75 (2 to 12)     | 2 (-10 to 15)     | 3 (1 to 6)    | 8 (4 to 13)      | 0 (-1 to 1)   | 2 (-3 to 9)      |

**Colorectal**

|    |                    |                           |                    |                   |                  |                   |                |                 |                |                 |
|----|--------------------|---------------------------|--------------------|-------------------|------------------|-------------------|----------------|-----------------|----------------|-----------------|
| 26 | Age                | <i>consumer behavior</i>  | 584 (183 to 1090)  | 79 (-90 to 289)   | 251 (126 to 412) | 117 (19 to 224)   |                |                 |                |                 |
| 28 |                    | <i>+industry response</i> | 1050 (605 to 1610) | 201 (23 to 426)   | 341 (209 to 514) | 175 (81 to 289)   |                |                 |                |                 |
| 30 | Race/Ethnicity     |                           |                    |                   |                  |                   |                |                 |                |                 |
| 31 | Non-Hispanic White | <i>consumer behavior</i>  | 67 (-51 to 261)    | 169 (-107 to 569) | -35 (-106 to 64) | -17 (-151 to 163) | 52 (11 to 111) | 126 (21 to 262) | 55 (11 to 115) | 44 (-36 to 129) |
| 33 |                    | <i>+industry response</i> | 144 (-2 to 382)    | 358 (40 to 790)   | -12 (-80 to 97)  | 38 (-99 to 233)   | 75 (30 to 146) | 168 (62 to 313) | 73 (28 to 138) | 70 (-7 to 162)  |
| 34 | Non-Hispanic Black | <i>consumer behavior</i>  | 31 (-9 to 88)      | 38 (-48 to 144)   | 11 (-1 to 29)    | 26 (-13 to 79)    | 19 (7 to 36)   | 14 (-17 to 49)  | 3 (-4 to 12)   | 8 (1 to 17)     |
| 36 |                    | <i>+industry response</i> | 53 (9 to 119)      | 78 (-8 to 203)    | 17 (4 to 36)     | 36 (-2 to 91)     | 23 (11 to 41)  | 20 (-9 to 56)   | 6 (-1 to 15)   | 11 (3 to 21)    |
| 37 | Hispanic           | <i>consumer behavior</i>  | 45 (2 to 113)      | 185 (25 to 409)   | 20 (1 to 43)     | 57 (9 to 114)     | 3 (-7 to 16)   | 21 (2 to 44)    | 4 (-1 to 11)   | 1 (-8 to 11)    |

|    |                           |                           |                           |                     |                    |                    |                  |                    |                 |                   |                |
|----|---------------------------|---------------------------|---------------------------|---------------------|--------------------|--------------------|------------------|--------------------|-----------------|-------------------|----------------|
| 1  |                           | <i>+industry response</i> | 73<br>(18 to 155)         | 256<br>(84 to 504)  | 26<br>(8 to 51)    | 70<br>(23 to 129)  | 6<br>(-3 to 20)  | 28<br>(10 to 53)   | 6<br>(1 to 13)  | 4<br>(-5 to 14)   |                |
| 2  | Other                     | <i>consumer behavior</i>  | -2<br>(-21 to 26)         | 20<br>(-31 to 89)   | 7<br>(-1 to 19)    | 1<br>(-20 to 26)   | 4<br>(0 to 11)   | 8<br>(1 to 16)     | -1<br>(-3 to 2) | 3<br>(-6 to 13)   |                |
| 3  |                           | <i>+industry response</i> | 6<br>(-13 to 36)          | 41<br>(-9 to 115)   | 9<br>(1 to 21)     | 5<br>(-15 to 31)   | 6<br>(1 to 12)   | 10<br>(4 to 19)    | 0<br>(-2 to 3)  | 4<br>(-5 to 14)   |                |
| 4  |                           |                           |                           |                     |                    |                    |                  |                    |                 |                   |                |
| 5  |                           |                           |                           |                     |                    |                    |                  |                    |                 |                   |                |
| 6  |                           |                           |                           |                     |                    |                    |                  |                    |                 |                   |                |
| 7  | <b>Thyroid</b>            |                           |                           |                     |                    |                    |                  |                    |                 |                   |                |
| 8  | Age                       | <i>consumer behavior</i>  | 374 (114 to 751)          |                     | 10 (-69 to 125)    |                    | 84 (44 to 144)   |                    | 34 (7 to 68)    |                   |                |
| 9  |                           | <i>+industry response</i> | 683 (349 to 1130)         |                     | 67 (-17 to 200)    |                    | 117 (70 to 187)  |                    | 52 (22 to 91)   |                   |                |
| 10 |                           |                           |                           |                     |                    |                    |                  |                    |                 |                   |                |
| 11 | <b>Race/Ethnicity</b>     |                           |                           |                     |                    |                    |                  |                    |                 |                   |                |
| 12 | Non-Hispanic White        | <i>consumer behavior</i>  | 96<br>(-59 to 382)        | 52<br>(-59 to 273)  | -28<br>(-85 to 56) | -15<br>(-64 to 58) | 21<br>(1 to 62)  | 28<br>(1 to 73)    | 20<br>(2 to 47) | 8<br>(-9 to 31)   |                |
| 13 |                           | <i>+industry response</i> | 205<br>(-15 to 563)       | 131<br>(-26 to 395) | -8<br>(-63 to 92)  | 3<br>(-43 to 85)   | 33<br>(5 to 80)  | 40<br>(12 to 90)   | 28<br>(9 to 58) | 14<br>(-3 to 40)  |                |
| 14 |                           | Non-Hispanic Black        | <i>consumer behavior</i>  | 29<br>(-10 to 113)  | 7<br>(-10 to 36)   | 8<br>(-1 to 24)    | 3<br>(-3 to 12)  | 12<br>(6 to 22)    | 2<br>(-2 to 8)  | 1<br>(-2 to 5)    | 1<br>(0 to 2)  |
| 15 |                           |                           | <i>+industry response</i> | 52<br>(-1 to 153)   | 16<br>(-4 to 50)   | 12<br>(2 to 30)    | 5<br>(-1 to 15)  | 14<br>(8 to 26)    | 3<br>(-1 to 10) | 2<br>(0 to 7)     | 2<br>(1 to 3)  |
| 16 | Hispanic                  | <i>consumer behavior</i>  | 68<br>(1 to 201)          | 59<br>(6 to 151)    | 15<br>(-5 to 39)   | 13<br>(2 to 30)    | 2<br>(-4 to 12)  | 4<br>(0 to 9)      | 2<br>(-1 to 6)  | 0<br>(-1 to 3)    |                |
| 17 |                           | <i>+industry response</i> | 113<br>(22 to 276)        | 84<br>(26 to 189)   | 21<br>(2 to 48)    | 16<br>(6 to 35)    | 4<br>(-2 to 15)  | 5<br>(2 to 12)     | 3<br>(0 to 8)   | 1<br>(-1 to 3)    |                |
| 18 |                           | Other                     | <i>consumer behavior</i>  | -4<br>(-38 to 59)   | 13<br>(-13 to 56)  | 6<br>(-4 to 20)    | 1<br>(-7 to 12)  | 5<br>(2 to 10)     | 5<br>(3 to 8)   | -1<br>(-2 to 1)   | 0<br>(-2 to 3) |
| 19 | <i>+industry response</i> |                           | 12<br>(-25 to 82)         | 23<br>(-2 to 70)    | 8<br>(-1 to 23)    | 3<br>(-5 to 14)    | 6<br>(3 to 11)   | 6<br>(4 to 9)      | 0<br>(-2 to 2)  | 1<br>(-1 to 4)    |                |
| 20 |                           |                           |                           |                     |                    |                    |                  |                    |                 |                   |                |
| 21 |                           |                           |                           |                     |                    |                    |                  |                    |                 |                   |                |
| 22 |                           |                           |                           |                     |                    |                    |                  |                    |                 |                   |                |
| 23 |                           |                           |                           |                     |                    |                    |                  |                    |                 |                   |                |
| 24 |                           |                           |                           |                     |                    |                    |                  |                    |                 |                   |                |
| 25 |                           |                           |                           |                     |                    |                    |                  |                    |                 |                   |                |
| 26 |                           |                           |                           |                     |                    |                    |                  |                    |                 |                   |                |
| 27 |                           |                           |                           |                     |                    |                    |                  |                    |                 |                   |                |
| 28 |                           |                           |                           |                     |                    |                    |                  |                    |                 |                   |                |
| 29 |                           |                           |                           |                     |                    |                    |                  |                    |                 |                   |                |
| 30 | <b>Multiple Myeloma</b>   |                           |                           |                     |                    |                    |                  |                    |                 |                   |                |
| 31 | Age                       | <i>consumer behavior</i>  | 370 (113 to 743)          |                     | 78 (-46 to 242)    |                    | 181 (85 to 308)  |                    | 63 (7 to 128)   |                   |                |
| 32 |                           | <i>+industry response</i> | 653 (327 to 1120)         |                     | 164 (29 to 357)    |                    | 243 (142 to 385) |                    | 97 (41 to 169)  |                   |                |
| 33 |                           |                           |                           |                     |                    |                    |                  |                    |                 |                   |                |
| 34 | <b>Race/Ethnicity</b>     |                           |                           |                     |                    |                    |                  |                    |                 |                   |                |
| 35 | Non-Hispanic White        | <i>consumer behavior</i>  | 27<br>(-34 to 138)        | 102<br>(-61 to 375) | -14<br>(-50 to 50) | -4<br>(-96 to 139) | 24<br>(3 to 67)  | 96<br>(25 to 204)  | 20<br>(1 to 52) | 23<br>(-23 to 83) |                |
| 36 |                           | <i>+industry response</i> | 64<br>(-22 to 204)        | 207<br>(0 to 544)   | -1<br>(-38 to 74)  | 29<br>(-60 to 199) | 36<br>(9 to 87)  | 125<br>(52 to 246) | 28<br>(8 to 65) | 39<br>(-5 to 111) |                |
| 37 |                           |                           |                           |                     |                    |                    |                  |                    |                 |                   |                |
| 38 |                           |                           |                           |                     |                    |                    |                  |                    |                 |                   |                |
| 39 |                           |                           |                           |                     |                    |                    |                  |                    |                 |                   |                |
| 40 |                           |                           |                           |                     |                    |                    |                  |                    |                 |                   |                |
| 41 |                           |                           |                           |                     |                    |                    |                  |                    |                 |                   |                |
| 42 |                           |                           |                           |                     |                    |                    |                  |                    |                 |                   |                |
| 43 |                           |                           |                           |                     |                    |                    |                  |                    |                 |                   |                |
| 44 |                           |                           |                           |                     |                    |                    |                  |                    |                 |                   |                |
| 45 |                           |                           |                           |                     |                    |                    |                  |                    |                 |                   |                |
| 46 |                           |                           |                           |                     |                    |                    |                  |                    |                 |                   |                |
| 47 |                           |                           |                           |                     |                    |                    |                  |                    |                 |                   |                |

|    |                                 |                           |                   |                     |                   |                     |                  |                    |                 |                    |
|----|---------------------------------|---------------------------|-------------------|---------------------|-------------------|---------------------|------------------|--------------------|-----------------|--------------------|
| 1  | Non-Hispanic Black              | <i>consumer behavior</i>  | 39<br>(-9 to 135) | 22<br>(-63 to 178)  | 14<br>(-1 to 43)  | 27<br>(-15 to 95)   | 19<br>(4 to 45)  | 11<br>(-22 to 60)  | 4<br>(-4 to 17) | 10<br>(2 to 22)    |
| 2  |                                 | <i>+industry response</i> | 66<br>(1 to 183)  | 65<br>(-30 to 242)  | 22<br>(4 to 55)   | 38<br>(-3 to 113)   | 24<br>(9 to 54)  | 18<br>(-13 to 71)  | 6<br>(-1 to 20) | 13<br>(5 to 26)    |
| 3  | Hispanic                        | <i>consumer behavior</i>  | 26<br>(0 to 79)   | 111<br>(12 to 277)  | 7<br>(-5 to 24)   | 25<br>(-3 to 68)    | 2<br>(-4 to 11)  | 15<br>(3 to 32)    | 2<br>(-1 to 7)  | 0<br>(-5 to 7)     |
| 4  |                                 | <i>+industry response</i> | 43<br>(6 to 110)  | 154<br>(50 to 340)  | 10<br>(0 to 30)   | 33<br>(6 to 82)     | 4<br>(-2 to 15)  | 19<br>(8 to 39)    | 3<br>(0 to 9)   | 1<br>(-3 to 9)     |
| 5  | Other                           | <i>consumer behavior</i>  | 0<br>(-7 to 11)   | 8<br>(-11 to 41)    | 7<br>(3 to 12)    | 0<br>(-10 to 12)    | 1<br>(1 to 4)    | 4<br>(1 to 9)      | -0<br>(-1 to 1) | 1<br>(-3 to 6)     |
| 6  |                                 | <i>+industry response</i> | 2<br>(-4 to 16)   | 16<br>(-3 to 53)    | 8<br>(4 to 13)    | 1<br>(-8 to 15)     | 2<br>(0 to 5)    | 5<br>(2 to 11)     | 0<br>(-1 to 1)  | 1<br>(-2 to 6)     |
| 7  |                                 |                           |                   |                     |                   |                     |                  |                    |                 |                    |
| 8  |                                 |                           |                   |                     |                   |                     |                  |                    |                 |                    |
| 9  |                                 |                           |                   |                     |                   |                     |                  |                    |                 |                    |
| 10 |                                 |                           |                   |                     |                   |                     |                  |                    |                 |                    |
| 11 |                                 |                           |                   |                     |                   |                     |                  |                    |                 |                    |
| 12 |                                 |                           |                   |                     |                   |                     |                  |                    |                 |                    |
| 13 | <b>Stomach (Gastric Cardia)</b> |                           |                   |                     |                   |                     |                  |                    |                 |                    |
| 14 |                                 |                           |                   |                     |                   |                     |                  |                    |                 |                    |
| 15 |                                 |                           |                   |                     |                   |                     |                  |                    |                 |                    |
| 16 | Age                             | <i>consumer behavior</i>  | 338 (49 to 803)   |                     | 58 (-99 to 264)   |                     | 182 (70 to 347)  |                    | 54 (-19 to 149) |                    |
| 17 |                                 | <i>+industry response</i> | 607 (241 to 1140) |                     | 141 (-20 to 378)  |                     | 240 (129 to 420) |                    | 86 (15 to 190)  |                    |
| 18 |                                 |                           |                   |                     |                   |                     |                  |                    |                 |                    |
| 19 | Race/Ethnicity                  |                           |                   |                     |                   |                     |                  |                    |                 |                    |
| 20 | Non-Hispanic White              | <i>consumer behavior</i>  | 18<br>(-19 to 77) | 208<br>(-55 to 648) | -9<br>(-31 to 25) | 24<br>(-128 to 233) | 15<br>(4 to 37)  | 145<br>(35 to 304) | 14<br>(3 to 28) | 34<br>(-36 to 124) |
| 21 |                                 | <i>+industry response</i> | 43<br>(-6 to 117) | 380<br>(51 to 886)  | -1<br>(-24 to 38) | 86<br>(-67 to 322)  | 22<br>(9 to 47)  | 187<br>(77 to 364) | 18<br>(8 to 35) | 58<br>(-9 to 160)  |
| 22 | Non-Hispanic Black              | <i>consumer behavior</i>  | 7<br>(-2 to 21)   | 6<br>(-19 to 44)    | 2<br>(0 to 6)     | 7<br>(-5 to 24)     | 3<br>(1 to 7)    | 3<br>(-6 to 15)    | 0<br>(0 to 2)   | 3<br>(1 to 5)      |
| 23 |                                 | <i>+industry response</i> | 12<br>(2 to 28)   | 19<br>(-8 to 62)    | 3<br>(1 to 7)     | 10<br>(-2 to 29)    | 4<br>(2 to 8)    | 5<br>(-4 to 17)    | 1<br>(0 to 2)   | 3<br>(2 to 6)      |
| 24 | Hispanic                        | <i>consumer behavior</i>  | 15<br>(1 to 39)   | 63<br>(-7 to 170)   | 5<br>(0 to 13)    | 16<br>(-4 to 45)    | 1<br>(-2 to 5)   | 7<br>(0 to 18)     | 1<br>(0 to 3)   | 1<br>(-3 to 5)     |
| 25 |                                 | <i>+industry response</i> | 24<br>(6 to 52)   | 95<br>(21 to 214)   | 7<br>(2 to 16)    | 22<br>(3 to 54)     | 2<br>(-1 to 6)   | 10<br>(3 to 23)    | 1<br>(0 to 3)   | 2<br>(-2 to 7)     |
| 26 | Other                           | <i>consumer behavior</i>  | -1<br>(-7 to 10)  | 5<br>(-14 to 34)    | 5<br>(2 to 9)     | 0<br>(-8 to 12)     | 1<br>(0 to 3)    | 4<br>(1 to 9)      | 0<br>(-1 to 1)  | 1<br>(-3 to 6)     |
| 27 |                                 | <i>+industry response</i> | 2<br>(-5 to 14)   | 12<br>(-7 to 46)    | 6<br>(3 to 10)    | 2<br>(-6 to 15)     | 2<br>(0 to 4)    | 5<br>(2 to 10)     | 0<br>(-1 to 1)  | 2<br>(-2 to 7)     |
| 28 |                                 |                           |                   |                     |                   |                     |                  |                    |                 |                    |
| 29 |                                 |                           |                   |                     |                   |                     |                  |                    |                 |                    |
| 30 |                                 |                           |                   |                     |                   |                     |                  |                    |                 |                    |
| 31 |                                 |                           |                   |                     |                   |                     |                  |                    |                 |                    |
| 32 |                                 |                           |                   |                     |                   |                     |                  |                    |                 |                    |
| 33 |                                 |                           |                   |                     |                   |                     |                  |                    |                 |                    |
| 34 |                                 |                           |                   |                     |                   |                     |                  |                    |                 |                    |
| 35 |                                 |                           |                   |                     |                   |                     |                  |                    |                 |                    |
| 36 |                                 |                           |                   |                     |                   |                     |                  |                    |                 |                    |
| 37 |                                 |                           |                   |                     |                   |                     |                  |                    |                 |                    |
| 38 | <b>Gallbladder</b>              |                           |                   |                     |                   |                     |                  |                    |                 |                    |
| 39 | Age                             | <i>consumer behavior</i>  | 161 (67 to 263)   |                     | 51 (8 to 100)     |                     | 76 (47 to 109)   |                    | 29 (11 to 51)   |                    |
| 40 |                                 | <i>+industry response</i> | 282 (181 to 396)  |                     | 86 (43 to 138)    |                     | 101 (73 to 137)  |                    | 44 (25 to 66)   |                    |
| 41 |                                 |                           |                   |                     |                   |                     |                  |                    |                 |                    |
| 42 |                                 |                           |                   |                     |                   |                     |                  |                    |                 |                    |
| 43 |                                 |                           |                   |                     |                   |                     |                  |                    |                 |                    |
| 44 |                                 |                           |                   |                     |                   |                     |                  |                    |                 |                    |
| 45 |                                 |                           |                   |                     |                   |                     |                  |                    |                 |                    |
| 46 |                                 |                           |                   |                     |                   |                     |                  |                    |                 |                    |
| 47 |                                 |                           |                   |                     |                   |                     |                  |                    |                 |                    |



|    |                 |                  |                  |              |                 |              |                 |             |                |             |
|----|-----------------|------------------|------------------|--------------|-----------------|--------------|-----------------|-------------|----------------|-------------|
| 1  | Race/Ethnicity  |                  |                  |              |                 |              |                 |             |                |             |
| 2  | Non-            | <i>consumer</i>  | 24               | 19           | 0               | 1.97         | 19              | 23          | 16             | 6           |
| 3  | Hispanic        | <i>behavior</i>  | (-10 to 71)      | (-13 to 61)  | (-25 to 30)     | (-17 to 24)  | (5 to 38)       | (6 to 42)   | (3 to 31)      | (-5 to 17)  |
| 4  | White           | <i>+industry</i> | 47               | 39           | 9               | 9            | 27              | 29          | 21             | 9           |
| 5  |                 | <i>response</i>  | (10 to 99)       | (5 to 88)    | (-16 to 42)     | (-10 to 34)  | (12 to 48)      | (13 to 50)  | (8 to 37)      | (-1 to 21)  |
| 6  | Non-            | <i>consumer</i>  | 27               | 2            | 11              | 6            | 14              | 4           | 2              | 2           |
| 7  | Hispanic Black  | <i>behavior</i>  | (-6 to 70)       | (-17 to 26)  | (0 to 24)       | (-4 to 18)   | (4 to 26)       | (-4 to 12)  | (-2 to 7)      | (0 to 4)    |
| 8  |                 | <i>+industry</i> | 45               | 11           | 15              | 9            | 17              | 5           | 4              | 3           |
| 9  |                 | <i>response</i>  | (11 to 93)       | (-8 to 38)   | (4 to 29)       | (-1 to 21)   | (8 to 30)       | (-2 to 14)  | (-1 to 9)      | (1 to 5)    |
| 10 | Hispanic        | <i>consumer</i>  | 32               | 42           | 10              | 14           | 3               | 7           | 3              | 0           |
| 11 |                 | <i>behavior</i>  | (2 to 73)        | (-10 to 106) | (-4 to 26)      | (-2 to 34)   | (-5 to 11)      | (1 to 15)   | (-1 to 7)      | (-3 to 4)   |
| 12 |                 | <i>+industry</i> | 53               | 65           | 15              | 19           | 5               | 9           | 4              | 1           |
| 13 |                 | <i>response</i>  | (19 to 96)       | (11 to 130)  | (1 to 31)       | (3 to 39)    | (-2 to 14)      | (3 to 18)   | (1 to 9)       | (-2 to 5)   |
| 14 | Other           | <i>consumer</i>  | 0                | 3            | 6               | 0            | 3               | 3           | 0              | 1           |
| 15 |                 | <i>behavior</i>  | (-11 to 18)      | (-6 to 15)   | (1 to 13)       | (-4 to 5)    | (0 to 7)        | (1 to 5)    | (-1 to 1)      | (-1 to 3)   |
| 16 |                 | <i>+industry</i> | 5                | 7            | 7               | 1            | 4               | 3           | 0              | 1           |
| 17 |                 | <i>response</i>  | (-7 to 24)       | (-2 to 19)   | (2 to 14)       | (-3 to 6)    | (1 to 8)        | (1 to 5)    | (-1 to 2)      | (-1 to 3)   |
| 18 | <b>Advanced</b> |                  |                  |              |                 |              |                 |             |                |             |
| 19 | <b>Prostate</b> |                  |                  |              |                 |              |                 |             |                |             |
| 20 |                 | <i>consumer</i>  |                  |              |                 |              |                 |             |                |             |
| 21 | Age             | <i>behavior</i>  | 163 (9 to 360)   |              | 37 (-54 to 146) |              | 106 (33 to 194) |             | 35 (-14 to 91) |             |
| 22 |                 | <i>+industry</i> |                  |              |                 |              |                 |             |                |             |
| 23 |                 | <i>response</i>  | 300 (130 to 507) |              | 85 (-6 to 203)  |              | 142 (67 to 240) |             | 56 (9 to 119)  |             |
| 24 | Race/Ethnicity  |                  |                  |              |                 |              |                 |             |                |             |
| 25 | Non-            | <i>consumer</i>  |                  | 86           |                 | -1           |                 | 75          |                | 24          |
| 26 | Hispanic        | <i>behavior</i>  | 0                | (-24 to 267) | 0               | (-80 to 98)  | 0               | (9 to 162)  | 0              | (-23 to 80) |
| 27 | White           | <i>+industry</i> | 0                | 162          | 0               | 30           | 0               | 100         | 0              | 40          |
| 28 |                 | <i>response</i>  |                  | (32 to 350)  |                 | (-48 to 144) |                 | (36 to 199) |                | (-5 to 102) |
| 29 | Non-            | <i>consumer</i>  | 0                | 3            | 0               | 21           | 0               | 16          | 0              | 8           |
| 30 | Hispanic Black  | <i>behavior</i>  | 0                | (-61 to 97)  | 0               | (-17 to 69)  | 0               | (-13 to 51) | 0              | (2 to 17)   |
| 31 |                 | <i>+industry</i> | 0                | 34           | 0               | 31           | 0               | 22          | 0              | 11          |
| 32 |                 | <i>response</i>  |                  | (-33 to 145) |                 | (-5 to 83)   |                 | (-7 to 57)  |                | (4 to 20)   |
| 33 | Hispanic        | <i>consumer</i>  | 0                | 59           | 0               | 13           | 0               | 9           | 0              | 1           |
| 34 |                 | <i>behavior</i>  | 0                | (8 to 133)   | 0               | (-3 to 37)   | 0               | (2 to 20)   | 0              | (-3 to 5)   |
| 35 |                 | <i>+industry</i> | 0                | 82           | 0               | 18           | 0               | 12          | 0              | 2           |
| 36 |                 | <i>response</i>  |                  | (28 to 163)  |                 | (1 to 44)    |                 | (5 to 23)   |                | (-2 to 7)   |
| 37 | Other           | <i>consumer</i>  | 0                | 3            | 0               | 0            | 0               | 4           | 0              | 1           |
| 38 |                 | <i>behavior</i>  | 0                | (-10 to 21)  | 0               | (-7 to 8)    | 0               | (2 to 8)    | 0              | (-3 to 5)   |
| 39 |                 | <i>+industry</i> | 0                | 8            | 0               | 1            | 0               | 5           | 0              | 2           |
| 40 |                 | <i>response</i>  |                  | (-5 to 28)   |                 | (-5 to 9)    |                 | (3 to 9)    |                | (-2 to 6)   |
| 41 |                 |                  |                  |              |                 |              |                 |             |                |             |
| 42 |                 |                  |                  |              |                 |              |                 |             |                |             |
| 43 |                 |                  |                  |              |                 |              |                 |             |                | 19          |
| 44 |                 |                  |                  |              |                 |              |                 |             |                |             |
| 45 |                 |                  |                  |              |                 |              |                 |             |                |             |
| 46 |                 |                  |                  |              |                 |              |                 |             |                |             |
| 47 |                 |                  |                  |              |                 |              |                 |             |                |             |

**Ovarian**

|    |                |                           |                 |   |                |   |               |   |               |
|----|----------------|---------------------------|-----------------|---|----------------|---|---------------|---|---------------|
| 1  |                |                           |                 |   |                |   |               |   |               |
| 2  | Age            | <i>consumer behavior</i>  | 66 (-10 to 180) |   | 16 (-20 to 75) |   | 31 (11 to 69) |   | 28 (11 to 61) |
| 3  |                | <i>+industry response</i> |                 |   |                |   |               |   |               |
| 4  |                |                           | 129 (16 to 277) |   | 33 (-6 to 102) |   | 45 (17 to 87) |   | 37 (19 to 75) |
| 5  | Race/Ethnicity |                           |                 |   |                |   |               |   |               |
| 6  | Non-           | <i>consumer behavior</i>  | 34              |   | -4             |   | 20            |   | 25            |
| 7  | Hispanic       |                           | (-25 to 147)    | 0 | (-38 to 54)    | 0 | (2 to 55)     | 0 | (8 to 57)     |
| 8  | White          | <i>+industry response</i> |                 |   |                |   |               |   |               |
| 9  |                |                           | 71              | 0 | 7              | 0 | 30            | 0 | 32            |
| 10 |                |                           | (-23 to 220)    |   | (-30 to 72)    |   | (6 to 71)     |   | (15 to 70)    |
| 11 | Non-           | <i>consumer behavior</i>  | 11              | 0 | 4              | 0 | 6             | 0 | 1             |
| 12 | Hispanic Black |                           | (-5 to 41)      |   | (0 to 13)      |   | (3 to 13)     |   | (-1 to 5)     |
| 13 |                | <i>+industry response</i> |                 |   |                |   |               |   |               |
| 14 |                |                           | 19              | 0 | 6              | 0 | 8             | 0 | 2             |
| 15 | Hispanic       |                           | (-3 to 56)      |   | (0 to 17)      |   | (4 to 16)     |   | (0 to 6)      |
| 16 |                | <i>consumer behavior</i>  | 21              | 0 | 8              | 0 | 1             | 0 | 1             |
| 17 |                |                           | (-2 to 67)      |   | (-1 to 21)     |   | (-3 to 8)     |   | (-1 to 5)     |
| 18 |                | <i>+industry response</i> |                 |   |                |   |               |   |               |
| 19 | Other          |                           | 34              | 0 | 11             | 0 | 3             | 0 | 2             |
| 20 |                |                           | (1 to 91)       |   | (3 to 26)      |   | (-1 to 10)    |   | (0 to 6)      |
| 21 |                | <i>consumer behavior</i>  | -8              | 0 | 6              | 0 | 2             | 0 | 0             |
| 22 |                |                           | (-19 to 13)     |   | (2 to 13)      |   | (1 to 5)      |   | (-1 to 1)     |
| 23 |                | <i>+industry response</i> |                 |   |                |   |               |   |               |
| 24 |                |                           | -3              | 0 | 7              | 0 | 3             | 0 | 0             |
| 25 |                |                           | (-15 to 21)     |   | (3 to 14)      |   | (1 to 6)      |   | (-1 to 2)     |

1. Values are the median estimates (95% uncertainty intervals) of each distribution of 1000 simulations.

For peer review only

**Supplementary Table 11.** Estimated cancer deaths reduced by the federal menu calorie labeling in the US by age, sex, race/ethnicity, and cancer type, over a lifetime (U.S. population=235,162,844)<sup>1</sup>

| Cancer Type                    | Policy Scenario           | 20-44 y                |                        | 45-54 y              |                       | 55-64 y             |                      | 65 + y             |                     |  |
|--------------------------------|---------------------------|------------------------|------------------------|----------------------|-----------------------|---------------------|----------------------|--------------------|---------------------|--|
|                                |                           | Female                 | Male                   | Female               | Male                  | Female              | Male                 | Female             | Male                |  |
| <b>Breast (Postmenopausal)</b> |                           |                        |                        |                      |                       |                     |                      |                    |                     |  |
| Age                            | <i>consumer behavior</i>  | 2490 (260 to 4980)     |                        | 151 (-204 to 521)    |                       | 285 (129 to 479)    |                      | 126 (30 to 227)    |                     |  |
|                                | <i>+industry response</i> | 4610 (2290 to 7240)    |                        | 336 (-26 to 725)     |                       | 396 (237 to 598)    |                      | 178 (82 to 284)    |                     |  |
| Race/Ethnicity                 |                           |                        |                        |                      |                       |                     |                      |                    |                     |  |
| Non-Hispanic White             | <i>consumer behavior</i>  | 1350<br>(-652 to 3690) | 0                      | -55<br>(-373 to 278) | 0                     | 165<br>(33 to 327)  | 0                    | 103<br>(10 to 204) | 0                   |  |
|                                | <i>+industry response</i> | 2620<br>(480 to 5150)  | 0                      | 54<br>(-264 to 419)  | 0                     | 238<br>(105 to 401) | 0                    | 139<br>(47 to 244) | 0                   |  |
| Non-Hispanic Black             | <i>consumer behavior</i>  | 560<br>(-109 to 1280)  | 0                      | 85<br>(-11 to 200)   | 0                     | 95<br>(32 to 173)   | 0                    | 13<br>(-12 to 40)  | 0                   |  |
|                                | <i>+industry response</i> | 901<br>(238 to 1660)   | 0                      | 126<br>(26 to 247)   | 0                     | 117<br>(53 to 196)  | 0                    | 21<br>(-4 to 49)   | 0                   |  |
| Hispanic                       | <i>consumer behavior</i>  | 572<br>(45 to 1180)    | 0                      | 76<br>(-7 to 163)    | 0                     | 9<br>(-21 to 44)    | 0                    | 10<br>(-3 to 24)   | 0                   |  |
|                                | <i>+industry response</i> | 922<br>(364 to 1570)   | 0                      | 104<br>(21 to 193)   | 0                     | 21<br>(-9 to 57)    | 0                    | 15<br>(2 to 30)    | 0                   |  |
| Other                          | <i>consumer behavior</i>  | 0<br>(-306 to 378)     | 0                      | 39<br>(9 to 76)      | 0                     | 15<br>(2 to 31)     | 0                    | -1<br>(-6 to 3)    | 0                   |  |
|                                | <i>+industry response</i> | 125<br>(-185 to 532)   | 0                      | 45<br>(16 to 84)     | 0                     | 19<br>(6 to 35)     | 0                    | 0<br>(-5 to 5)     | 0                   |  |
| <b>Liver</b>                   |                           |                        |                        |                      |                       |                     |                      |                    |                     |  |
| Age                            | <i>consumer behavior</i>  | 2840 (897 to 4890)     |                        | 628 (-181 to 1570)   |                       | 852 (411 to 1340)   |                      | 227 (18 to 455)    |                     |  |
|                                | <i>+industry response</i> | 4900 (2760 to 7190)    |                        | 1200 (345 to 2210)   |                       | 1140 (689 to 1650)  |                      | 357 (146 to 587)   |                     |  |
| Race/Ethnicity                 |                           |                        |                        |                      |                       |                     |                      |                    |                     |  |
| Non-Hispanic White             | <i>consumer behavior</i>  | 139<br>(-108 to 504)   | 1040<br>(-237 to 2780) | 15<br>(-147 to 207)  | -70<br>(-749 to 722)  | 98<br>(31 to 196)   | 440<br>(93 to 858)   | 63<br>(6 to 130)   | 97<br>(-88 to 297)  |  |
|                                | <i>+industry response</i> | 310<br>(42 to 719)     | 1900<br>(449 to 3830)  | 67<br>(-93 to 276)   | 199<br>(-478 to 1040) | 137<br>(67 to 240)  | 565<br>(241 to 1020) | 85<br>(30 to 159)  | 161<br>(-18 to 369) |  |

|    |                            |                           |                       |                       |                      |                      |                     |                     |                    |                   |
|----|----------------------------|---------------------------|-----------------------|-----------------------|----------------------|----------------------|---------------------|---------------------|--------------------|-------------------|
| 1  | Non-Hispanic Black         | <i>consumer behavior</i>  | 134<br>(-25 to 317)   | 72<br>(-601 to 932)   | 49<br>(3 to 110)     | 193<br>(-133 to 632) | 43<br>(12 to 85)    | 100<br>(-95 to 336) | 6<br>(-6 to 22)    | 29<br>(-4 to 69)  |
| 2  |                            | <i>+industry response</i> | 214<br>(51 to 425)    | 382<br>(-273 to 1280) | 68<br>(23 to 133)    | 276<br>(-37 to 729)  | 54<br>(24 to 97)    | 139<br>(-49 to 377) | 10<br>(-2 to 27)   | 41<br>(8 to 83)   |
| 3  | Hispanic                   | <i>consumer behavior</i>  | 199<br>(17 to 473)    | 1020<br>(88 to 2210)  | 87<br>(2 to 189)     | 285<br>(13 to 630)   | 12<br>(-26 to 62)   | 99<br>(18 to 201)   | 15<br>(-4 to 35)   | 6<br>(-28 to 46)  |
| 4  |                            | <i>+industry response</i> | 316<br>(111 to 623)   | 1430<br>(482 to 2690) | 116<br>(31 to 223)   | 365<br>(94 to 729)   | 26<br>(-11 to 78)   | 131<br>(48 to 242)  | 21<br>(3 to 43)    | 17<br>(-15 to 59) |
| 5  | Other                      | <i>consumer behavior</i>  | 2<br>(-47 to 68)      | 90<br>(-110 to 339)   | 32<br>(7 to 65)      | -2<br>(-88 to 108)   | 12<br>(0 to 28)     | 30<br>(4 to 61)     | 0<br>(-6 to 6)     | 7<br>(-22 to 42)  |
| 6  |                            | <i>+industry response</i> | 22<br>(-28 to 93)     | 168<br>(-26 to 434)   | 36<br>(13 to 71)     | 15<br>(-70 to 130)   | 16<br>(4 to 32)     | 39<br>(14 to 74)    | 1<br>(-4 to 8)     | 11<br>(-18 to 46) |
| 7  |                            |                           |                       |                       |                      |                      |                     |                     |                    |                   |
| 8  | <b>Endometrial</b>         |                           |                       |                       |                      |                      |                     |                     |                    |                   |
| 9  | Age                        | <i>consumer behavior</i>  | 1190 (309 to 2140)    |                       | 251 (-248 to 785)    |                      | 394 (177 to 659)    |                     | 213 (51 to 378)    |                   |
| 10 |                            | <i>+industry response</i> | 2100 (1200 to 3110)   |                       | 512 (26 to 1060)     |                      | 548 (325 to 817)    |                     | 302 (139 to 472)   |                   |
| 11 | Race/Ethnicity             |                           |                       |                       |                      |                      |                     |                     |                    |                   |
| 12 | Non-Hispanic White         | <i>consumer behavior</i>  | 440<br>(-210 to 1170) | 0                     | -42<br>(-511 to 440) | 0                    | 206<br>(36 to 399)  | 0                   | 173<br>(13 to 319) | 0                 |
| 13 |                            | <i>+industry response</i> | 858<br>(218 to 1620)  | 0                     | 114<br>(-351 to 606) | 0                    | 298<br>(127 to 491) | 0                   | 234<br>(76 to 388) | 0                 |
| 14 | Non-Hispanic Black         | <i>consumer behavior</i>  | 412<br>(-90 to 937)   | 0                     | 139<br>(-9 to 293)   | 0                    | 157<br>(42 to 295)  | 0                   | 26<br>(-24 to 83)  | 0                 |
| 15 |                            | <i>+industry response</i> | 666<br>(177 to 1210)  | 0                     | 201<br>(51 to 361)   | 0                    | 195<br>(81 to 338)  | 0                   | 42<br>(-8 to 97)   | 0                 |
| 16 | Hispanic                   | <i>consumer behavior</i>  | 315<br>(22 to 645)    | 0                     | 105<br>(-22 to 222)  | 0                    | 16<br>(-33 to 70)   | 0                   | 19<br>(-7 to 44)   | 0                 |
| 17 |                            | <i>+industry response</i> | 505<br>(197 to 854)   | 0                     | 144<br>(21 to 261)   | 0                    | 34<br>(-14 to 89)   | 0                   | 28<br>(3 to 54)    | 0                 |
| 18 | Other                      | <i>consumer behavior</i>  | 8<br>(-99 to 139)     | 0                     | 51<br>(13 to 99)     | 0                    | 17<br>(1 to 36)     | 0                   | -3<br>(-10 to 5)   | 0                 |
| 19 |                            | <i>+industry response</i> | 50<br>(-56 to 187)    | 0                     | 58<br>(21 to 107)    | 0                    | 22<br>(6 to 41)     | 0                   | 0<br>(-8 to 7)     | 0                 |
| 20 |                            |                           |                       |                       |                      |                      |                     |                     |                    |                   |
| 21 | <b>Kidney (Renal Cell)</b> |                           |                       |                       |                      |                      |                     |                     |                    |                   |
| 22 | Age                        | <i>consumer behavior</i>  | 1050 (284 to 1830)    |                       | 263 (-153 to 695)    |                      | 506 (225 to 778)    |                     | 182 (20 to 338)    |                   |
| 23 |                            | <i>+industry response</i> | 1880 (1100 to 2680)   |                       | 539 (106 to 977)     |                      | 679 (402 to 954)    |                     | 276 (112 to 429)   |                   |
| 24 | Race/Ethnicity             |                           |                       |                       |                      |                      |                     |                     |                    |                   |

|    |                    |                           |                     |                      |                      |                      |                    |                     |                   |                     |
|----|--------------------|---------------------------|---------------------|----------------------|----------------------|----------------------|--------------------|---------------------|-------------------|---------------------|
| 1  | Non-Hispanic White | <i>consumer behavior</i>  | 57<br>(-23 to 159)  | 332<br>(-183 to 922) | -16<br>(-128 to 106) | 26<br>(-351 to 396)  | 72<br>(14 to 138)  | 287<br>(42 to 525)  | 66<br>(9 to 124)  | 81<br>(-68 to 219)  |
| 2  |                    |                           |                     |                      |                      |                      |                    |                     |                   |                     |
| 3  |                    | <i>+industry response</i> | 111<br>(27 to 224)  | 663<br>(123 to 1280) | 22<br>(-90 to 146)   | 168<br>(-199 to 552) | 105<br>(46 to 171) | 378<br>(138 to 623) | 89<br>(33 to 148) | 133<br>(-12 to 272) |
| 4  | Non-Hispanic Black | <i>consumer behavior</i>  | 67<br>(-16 to 162)  | 48<br>(-225 to 326)  | 24<br>(-2 to 53)     | 59<br>(-40 to 171)   | 30<br>(10 to 56)   | 35<br>(-32 to 106)  | 5<br>(-5 to 16)   | 16<br>(3 to 28)     |
| 5  |                    | <i>+industry response</i> | 113<br>(25 to 218)  | 174<br>(-96 to 461)  | 34<br>(9 to 64)      | 87<br>(-14 to 199)   | 37<br>(17 to 63)   | 49<br>(-17 to 121)  | 8<br>(-2 to 20)   | 20<br>(7 to 33)     |
| 6  | Hispanic           | <i>consumer behavior</i>  | 111<br>(9 to 229)   | 367<br>(0 to 792)    | 30<br>(-3 to 62)     | 118<br>(-15 to 261)  | 6<br>(-13 to 29)   | 47<br>(5 to 98)     | 7<br>(-2 to 17)   | 4<br>(-12 to 23)    |
| 7  |                    | <i>+industry response</i> | 177<br>(67 to 305)  | 522<br>(168 to 968)  | 40<br>(8 to 74)      | 157<br>(23 to 303)   | 13<br>(-5 to 36)   | 64<br>(22 to 116)   | 11<br>(1 to 21)   | 9<br>(-7 to 28)     |
| 8  | Other              | <i>consumer behavior</i>  | 3<br>(-23 to 34)    | 33<br>(-40 to 122)   | 15<br>(5 to 28)      | 0<br>(-28 to 33)     | 5<br>(1 to 11)     | 16<br>(5 to 29)     | -1<br>(-3 to 2)   | 4<br>(-8 to 17)     |
| 9  |                    | <i>+industry response</i> | 13<br>(-12 to 45)   | 63<br>(-10 to 156)   | 17<br>(7 to 30)      | 6<br>(-22 to 39)     | 6<br>(2 to 12)     | 20<br>(9 to 33)     | 0<br>(-2 to 3)    | 5<br>(-6 to 18)     |
| 10 |                    |                           |                     |                      |                      |                      |                    |                     |                   |                     |
| 11 | <b>Pancreatic</b>  |                           |                     |                      |                      |                      |                    |                     |                   |                     |
| 12 | Age                | <i>consumer behavior</i>  | 656 (220 to 1160)   |                      | 74 (-166 to 350)     |                      | 362 (175 to 581)   |                     | 131 (20 to 250)   |                     |
| 13 |                    | <i>+industry response</i> | 1160 (707 to 1730)  |                      | 243 (1 to 535)       |                      | 483 (293 to 708)   |                     | 199 (87 to 321)   |                     |
| 14 | Race/Ethnicity     |                           |                     |                      |                      |                      |                    |                     |                   |                     |
| 15 | Non-Hispanic White | <i>consumer behavior</i>  | 101<br>(-40 to 310) | 213<br>(-100 to 659) | -44<br>(-143 to 78)  | -13<br>(-216 to 221) | 79<br>(24 to 158)  | 193<br>(44 to 384)  | 56<br>(3 to 117)  | 50<br>(-45 to 162)  |
| 16 |                    | <i>+industry response</i> | 196<br>(42 to 425)  | 420<br>(85 to 911)   | -10<br>(-111 to 120) | 67<br>(-140 to 326)  | 111<br>(51 to 198) | 250<br>(102 to 448) | 78<br>(25 to 146) | 84<br>(-10 to 203)  |
| 17 | Non-Hispanic Black | <i>consumer behavior</i>  | 48<br>(-7 to 125)   | 16<br>(-72 to 117)   | 22<br>(-1 to 49)     | 27<br>(-18 to 78)    | 29<br>(8 to 57)    | 18<br>(-15 to 56)   | 5<br>(-5 to 17)   | 9<br>(1 to 17)      |
| 18 |                    | <i>+industry response</i> | 78<br>(18 to 162)   | 57<br>(-33 to 164)   | 31<br>(9 to 62)      | 39<br>(-3 to 91)     | 36<br>(15 to 65)   | 24<br>(-8 to 63)    | 8<br>(-1 to 20)   | 12<br>(4 to 19)     |
| 19 | Hispanic           | <i>consumer behavior</i>  | 55<br>(5 to 118)    | 175<br>(13 to 374)   | 24<br>(-4 to 53)     | 42<br>(-5 to 97)     | 4<br>(-10 to 20)   | 16<br>(-2 to 40)    | 5<br>(-2 to 13)   | 1<br>(-7 to 10)     |
| 20 |                    | <i>+industry response</i> | 88<br>(33 to 158)   | 245<br>(83 to 462)   | 32<br>(6 to 63)      | 57<br>(10 to 113)    | 9<br>(-5 to 25)    | 23<br>(5 to 48)     | 8<br>(1 to 16)    | 4<br>(-4 to 13)     |
| 21 | Other              | <i>consumer behavior</i>  | -2<br>(-23 to 25)   | 16<br>(-23 to 63)    | 14<br>(3 to 27)      | 0<br>(-18 to 20)     | 7<br>(1 to 14)     | 9<br>(3 to 17)      | 0<br>(-3 to 3)    | 2<br>(-5 to 11)     |
| 22 |                    | <i>+industry response</i> | 7<br>(-14 to 36)    | 32<br>(-7 to 82)     | 16<br>(6 to 30)      | 3<br>(-14 to 24)     | 9<br>(2 to 16)     | 11<br>(5 to 19)     | 1<br>(-2 to 4)    | 3<br>(-4 to 12)     |
| 23 |                    |                           |                     |                      |                      |                      |                    |                     |                   |                     |
| 24 |                    |                           |                     |                      |                      |                      |                    |                     |                   |                     |
| 25 |                    |                           |                     |                      |                      |                      |                    |                     |                   |                     |
| 26 |                    |                           |                     |                      |                      |                      |                    |                     |                   |                     |
| 27 |                    |                           |                     |                      |                      |                      |                    |                     |                   |                     |
| 28 |                    |                           |                     |                      |                      |                      |                    |                     |                   |                     |
| 29 |                    |                           |                     |                      |                      |                      |                    |                     |                   |                     |
| 30 |                    |                           |                     |                      |                      |                      |                    |                     |                   |                     |
| 31 |                    |                           |                     |                      |                      |                      |                    |                     |                   |                     |
| 32 |                    |                           |                     |                      |                      |                      |                    |                     |                   |                     |
| 33 |                    |                           |                     |                      |                      |                      |                    |                     |                   |                     |
| 34 |                    |                           |                     |                      |                      |                      |                    |                     |                   |                     |
| 35 |                    |                           |                     |                      |                      |                      |                    |                     |                   |                     |
| 36 |                    |                           |                     |                      |                      |                      |                    |                     |                   |                     |
| 37 |                    |                           |                     |                      |                      |                      |                    |                     |                   |                     |
| 38 |                    |                           |                     |                      |                      |                      |                    |                     |                   |                     |
| 39 |                    |                           |                     |                      |                      |                      |                    |                     |                   |                     |
| 40 |                    |                           |                     |                      |                      |                      |                    |                     |                   |                     |
| 41 |                    |                           |                     |                      |                      |                      |                    |                     |                   |                     |
| 42 |                    |                           |                     |                      |                      |                      |                    |                     |                   |                     |
| 43 |                    |                           |                     |                      |                      |                      |                    |                     |                   |                     |
| 44 |                    |                           |                     |                      |                      |                      |                    |                     |                   |                     |
| 45 |                    |                           |                     |                      |                      |                      |                    |                     |                   |                     |
| 46 |                    |                           |                     |                      |                      |                      |                    |                     |                   |                     |
| 47 |                    |                           |                     |                      |                      |                      |                    |                     |                   |                     |

**Esophageal Adenocarcinoma**

|                    |                           |                    |                    |                  |                   |                  |                  |                  |                  |
|--------------------|---------------------------|--------------------|--------------------|------------------|-------------------|------------------|------------------|------------------|------------------|
| Age                | <i>consumer behavior</i>  | 631 (33 to 1320)   |                    | 78 (-255 to 423) |                   | 348 (113 to 584) |                  | 101 (-42 to 239) |                  |
|                    | <i>+industry response</i> | 1150 (520 to 1870) |                    | 246 (-96 to 601) |                   | 457 (225 to 699) |                  | 161 (19 to 302)  |                  |
| Race/Ethnicity     |                           |                    |                    |                  |                   |                  |                  |                  |                  |
| Non-Hispanic White | <i>consumer behavior</i>  | 40 (-23 to 112)    | 366 (-206 to 1000) | -8 (-47 to 36)   | 24 (-314 to 359)  | 24 (6 to 47)     | 283 (55 to 516)  | 22 (4 to 41)     | 71 (-65 to 202)  |
|                    | <i>+industry response</i> | 81 (15 to 160)     | 732 (157 to 1400)  | 5 (-34 to 51)    | 152 (-176 to 495) | 35 (16 to 59)    | 366 (142 to 602) | 28 (11 to 48)    | 119 (-13 to 253) |
| Non-Hispanic Black | <i>consumer behavior</i>  | 9 (-1 to 20)       | 9 (-25 to 45)      | 3 (0 to 7)       | 10 (-6 to 28)     | 4 (1 to 8)       | 6 (-6 to 18)     | 1 (-1 to 2)      | 3 (0 to 5)       |
|                    | <i>+industry response</i> | 14 (3 to 26)       | 25 (-10 to 62)     | 4 (1 to 8)       | 14 (-2 to 33)     | 5 (2 to 9)       | 8 (-3 to 21)     | 1 (0 to 3)       | 4 (1 to 6)       |
| Hispanic           | <i>consumer behavior</i>  | 25 (2 to 52)       | 164 (2 to 354)     | 3 (-1 to 13)     | 40 (-7 to 99)     | 1 (-3 to 7)      | 21 (3 to 42)     | 1 (-1 to 4)      | 1 (-6 to 10)     |
|                    | <i>+industry response</i> | 40 (15 to 68)      | 235 (70 to 425)    | 5 (0 to 16)      | 55 (6 to 114)     | 3 (-1 to 8)      | 28 (10 to 50)    | 2 (0 to 4)       | 4 (-4 to 12)     |
| Other              | <i>consumer behavior</i>  | -1 (-9 to 10)      | 9 (-14 to 35)      | 5 (1 to 9)       | -1 (-10 to 10)    | 2 (0 to 4)       | 6 (2 to 10)      | 0 (-1 to 1)      | 1 (-3 to 7)      |
|                    | <i>+industry response</i> | 3 (-6 to 14)       | 18 (-5 to 46)      | 6 (2 to 10)      | 1 (-8 to 12)      | 2 (1 to 5)       | 7 (3 to 11)      | 0 (-1 to 1)      | 2 (-3 to 7)      |

**Colorectal**

|                    |                           |                   |                  |                 |                 |                  |                |                |                |
|--------------------|---------------------------|-------------------|------------------|-----------------|-----------------|------------------|----------------|----------------|----------------|
| Age                | <i>consumer behavior</i>  | 430 (139 to 779)  |                  | 56 (-48 to 184) |                 | 150 (77 to 241)  |                | 63 (13 to 119) |                |
|                    | <i>+industry response</i> | 764 (450 to 1160) |                  | 133 (23 to 268) |                 | 203 (126 to 304) |                | 95 (46 to 153) |                |
| Race/Ethnicity     |                           |                   |                  |                 |                 |                  |                |                |                |
| Non-Hispanic White | <i>consumer behavior</i>  | 49 (-36 to 181)   | 119 (-75 to 391) | -21 (-65 to 40) | -10 (-89 to 97) | 32 (7 to 67)     | 72 (11 to 150) | 31 (6 to 63)   | 22 (-17 to 64) |
|                    | <i>+industry response</i> | 106 (4 to 261)    | 248 (28 to 545)  | -6 (-49 to 59)  | 24 (-60 to 140) | 46 (20 to 85)    | 96 (36 to 176) | 41 (16 to 76)  | 35 (-3 to 81)  |
| Non-Hispanic Black | <i>consumer behavior</i>  | 26 (-7 to 70)     | 27 (-36 to 104)  | 8 (0 to 21)     | 18 (-9 to 53)   | 13 (4 to 24)     | 9 (-10 to 31)  | 2 (-2 to 7)    | 5 (0 to 10)    |
|                    | <i>+industry response</i> | 44 (9 to 94)      | 58 (-7 to 145)   | 12 (4 to 26)    | 25.1 (-1 to 61) | 15 (7 to 27)     | 13 (-6 to 36)  | 3 (-1 to 9)    | 6 (2 to 12)    |
| Hispanic           | <i>consumer behavior</i>  | 36 (2 to 88)      | 136 (21 to 300)  | 13 (0 to 27)    | 37 (5 to 74)    | 2 (-4 to 10)     | 13 (2 to 28)   | 2 (-1 to 7)    | 1 (-5 to 6)    |

|    |                 |                  |                  |              |                  |               |                  |             |                 |             |
|----|-----------------|------------------|------------------|--------------|------------------|---------------|------------------|-------------|-----------------|-------------|
| 1  |                 | <i>+industry</i> | 58               | 188          | 16               | 45            | 4                | 18          | 4               | 2           |
| 2  | Other           | <i>response</i>  | (17 to 120)      | (65 to 366)  | (5 to 32)        | (14 to 84)    | (-2 to 13)       | (6 to 33)   | (0 to 8)        | (-3 to 8)   |
| 3  |                 | <i>consumer</i>  | -1               | 16           | 5                | 0             | 2                | 5           | 0               | 1           |
| 4  |                 | <i>behavior</i>  | (-15 to 20)      | (-21 to 65)  | (-1 to 11)       | (-12 to 15)   | (0 to 6)         | (1 to 9)    | (-2 to 1)       | (-3 to 6)   |
| 5  |                 | <i>+industry</i> | 5                | 30           | 6                | 2             | 3                | 6           | 0               | 2           |
| 6  |                 | <i>response</i>  | (-9 to 27)       | (-5 to 83)   | (1 to 13)        | (-9 to 17)    | (1 to 7)         | (2 to 11)   | (-1 to 2)       | (-2 to 7)   |
| 7  | <b>Stomach</b>  |                  |                  |              |                  |               |                  |             |                 |             |
| 8  | <b>(Gastric</b> |                  |                  |              |                  |               |                  |             |                 |             |
| 9  | <b>Cardia)</b>  |                  |                  |              |                  |               |                  |             |                 |             |
| 10 | Age             | <i>consumer</i>  | 286 (45 to 672)  |              | 50 (-84 to 224)  |               | 149 (58 to 282)  |             | 42 (-14 to 113) |             |
| 11 |                 | <i>behavior</i>  |                  |              |                  |               |                  |             |                 |             |
| 12 |                 | <i>+industry</i> | 513 (196 to 965) |              | 120 (-14 to 321) |               | 196 (105 to 342) |             | 67 (13 to 145)  |             |
| 13 |                 | <i>response</i>  |                  |              |                  |               |                  |             |                 |             |
| 14 | Race/Ethnicity  |                  |                  |              |                  |               |                  |             |                 |             |
| 15 | Non-            | <i>consumer</i>  | 14               | 178          | -7               | 21            | 13               | 118         | 11              | 27          |
| 16 | Hispanic        | <i>behavior</i>  | (-16 to 63)      | (-46 to 545) | (-26 to 20)      | (-109 to 194) | (4 to 30)        | (29 to 248) | (3 to 22)       | (-26 to 95) |
| 17 | White           | <i>+industry</i> | 34               | 322          | -1               | 74            | 18               | 152         | 14              | 45          |
| 18 |                 | <i>response</i>  | (-5 to 95)       | (43 to 766)  | (-19 to 30)      | (-58 to 270)  | (7 to 38)        | (63 to 296) | (6 to 27)       | (-6 to 121) |
| 19 | Non-            | <i>consumer</i>  | 5                | 2            | 2                | 6             | 2                | 3           | 0               | 2           |
| 20 | Hispanic        | <i>behavior</i>  | (-1 to 17)       | (-11 to 29)  | (0 to 5)         | (-5 to 22)    | (1 to 5)         | (-5 to 13)  | (0 to 1)        | (1 to 4)    |
| 21 | Black           | <i>+industry</i> | 9                | 7            | 2                | 9             | 3                | 4           | 1               | 3           |
| 22 |                 | <i>response</i>  | (2 to 22)        | (-5 to 43)   | (1 to 6)         | (-2 to 26)    | (2 to 6)         | (-3 to 15)  | (0 to 2)        | (1 to 5)    |
| 23 | Hispanic        | <i>consumer</i>  | 13               | 57           | 5                | 14            | 1                | 6           | 1               | 0           |
| 24 |                 | <i>behavior</i>  | (1 to 35)        | (-6 to 154)  | (0 to 12)        | (-3 to 38)    | (-1 to 4)        | (0 to 15)   | (0 to 2)        | (-2 to 4)   |
| 25 |                 | <i>+industry</i> | 22               | 86           | 6                | 19            | 1                | 8           | 1               | 1           |
| 26 |                 | <i>response</i>  | (5 to 47)        | (20 to 194)  | (2 to 14)        | (3 to 46)     | (-1 to 5)        | (2 to 19)   | (0 to 3)        | (-1 to 6)   |
| 27 | Other           | <i>consumer</i>  | -1               | 4            | 4                | 0             | 1                | 3           | 0               | 1           |
| 28 |                 | <i>behavior</i>  | (-5 to 7)        | (-9 to 25)   | (2 to 8)         | (-7 to 10)    | (0 to 3)         | (1 to 7)    | (-1 to 1)       | (-2 to 5)   |
| 29 |                 | <i>+industry</i> | 1                | 9            | 4                | 2             | 1                | 4           | 0               | 1           |
| 30 |                 | <i>response</i>  | (-3 to 9)        | (-4 to 34)   | (2 to 8)         | (-5 to 12)    | (0 to 3)         | (2 to 8)    | (0 to 1)        | (-2 to 5)   |
| 31 |                 |                  |                  |              |                  |               |                  |             |                 |             |
| 32 | <b>Multiple</b> |                  |                  |              |                  |               |                  |             |                 |             |
| 33 | <b>Myeloma</b>  |                  |                  |              |                  |               |                  |             |                 |             |
| 34 | Age             | <i>consumer</i>  | 220 (65 to 441)  |              | 51 (-29 to 150)  |               | 112 (54 to 186)  |             | 42 (6 to 84)    |             |
| 35 |                 | <i>behavior</i>  |                  |              |                  |               |                  |             |                 |             |
| 36 |                 | <i>+industry</i> | 380 (202 to 657) |              | 105 (20 to 215)  |               | 151 (89 to 232)  |             | 63 (27 to 111)  |             |
| 37 |                 | <i>response</i>  |                  |              |                  |               |                  |             |                 |             |
| 38 | Race/Ethnicity  |                  |                  |              |                  |               |                  |             |                 |             |
| 39 | Non-            | <i>consumer</i>  | 11               | 59           | -8               | -3            | 15               | 58          | 14              | 15          |
| 40 | Hispanic        | <i>behavior</i>  | (-13 to 52)      | (-34 to 221) | (-32 to 31)      | (-59 to 83)   | (2 to 41)        | (15 to 123) | (1 to 35)       | (-14 to 54) |
| 41 | White           |                  |                  |              |                  |               |                  |             |                 |             |
| 42 |                 |                  |                  |              |                  |               |                  |             |                 |             |
| 43 |                 |                  |                  |              |                  |               |                  |             |                 |             |
| 44 |                 |                  |                  |              |                  |               |                  |             |                 |             |
| 45 |                 |                  |                  |              |                  |               |                  |             |                 |             |
| 46 |                 |                  |                  |              |                  |               |                  |             |                 |             |
| 47 |                 |                  |                  |              |                  |               |                  |             |                 |             |

|    |                          |                           |                   |                    |                   |                    |                  |                   |                 |                  |
|----|--------------------------|---------------------------|-------------------|--------------------|-------------------|--------------------|------------------|-------------------|-----------------|------------------|
| 1  |                          | <i>+industry response</i> | 26<br>(-7 to 81)  | 122<br>(1 to 321)  | -1<br>(-23 to 45) | 19<br>(-37 to 123) | 22<br>(6 to 53)  | 75<br>(32 to 147) | 19<br>(6 to 44) | 26<br>(-3 to 71) |
| 2  | Non-                     | <i>consumer behavior</i>  | 17<br>(-4 to 63)  | 14<br>(-40 to 115) | 10<br>(0 to 29)   | 17<br>(-10 to 59)  | 12<br>(3 to 28)  | 7<br>(-14 to 38)  | 2<br>(-3 to 11) | 6<br>(1 to 12)   |
| 3  | Hispanic Black           | <i>+industry response</i> | 29<br>(1 to 83)   | 44<br>(-20 to 159) | 15<br>(3 to 37)   | 24<br>(-1 to 70)   | 15<br>(6 to 34)  | 11<br>(-8 to 45)  | 4<br>(-1 to 13) | 7<br>(3 to 15)   |
| 4  |                          | <i>consumer behavior</i>  | 16<br>(0 to 51)   | 72<br>(9 to 193)   | 5<br>(-3 to 17)   | 15<br>(-2 to 42)   | 1<br>(-3 to 8)   | 10<br>(2 to 22)   | 2<br>(-1 to 5)  | 0<br>(-3 to 5)   |
| 5  | Hispanic                 | <i>+industry response</i> | 28<br>(5 to 71)   | 100<br>(31 to 244) | 7<br>(0 to 21)    | 21<br>(4 to 51)    | 3<br>(-1 to 10)  | 13<br>(5 to 26)   | 3<br>(0 to 6)   | 1<br>(-2 to 6)   |
| 6  |                          | <i>consumer behavior</i>  | 0<br>(-3 to 6)    | 5<br>(-7 to 27)    | 4<br>(2 to 7)     | 0<br>(-6 to 7)     | 1<br>(0 to 2)    | 3<br>(1 to 6)     | 0<br>(-1 to 1)  | 1<br>(-2 to 4)   |
| 7  | Other                    | <i>+industry response</i> | 1<br>(-2 to 8)    | 10<br>(-2 to 36)   | 4<br>(2 to 8)     | 1<br>(-5 to 9)     | 1<br>(0 to 3)    | 4<br>(2 to 7)     | 0<br>(-1 to 1)  | 1<br>(-1 to 4)   |
| 8  |                          |                           |                   |                    |                   |                    |                  |                   |                 |                  |
| 9  | <b>Gallbladder</b>       |                           |                   |                    |                   |                    |                  |                   |                 |                  |
| 10 | Age                      | <i>consumer behavior</i>  | 136 (58 to 229)   |                    | 44 (7 to 86)      |                    | 65 (40 to 93)    |                   | 24 (9 to 41)    |                  |
| 11 |                          | <i>+industry response</i> | 239 (153 to 341)  |                    | 74 (36 to 119)    |                    | 86 (61 to 117)   |                   | 36 (20 to 53)   |                  |
| 12 |                          |                           |                   |                    |                   |                    |                  |                   |                 |                  |
| 13 | Race/Ethnicity           |                           |                   |                    |                   |                    |                  |                   |                 |                  |
| 14 | Non-                     | <i>consumer behavior</i>  | 22<br>(-10 to 64) | 15<br>(-10 to 52)  | 0<br>(-23 to 27)  | 2<br>(-14 to 19)   | 16<br>(4 to 32)  | 19<br>(6 to 36)   | 13<br>(2 to 25) | 5<br>(-4 to 14)  |
| 15 | Hispanic White           | <i>+industry response</i> | 43<br>(9 to 90)   | 32<br>(4 to 72)    | 8<br>(-15 to 37)  | 8<br>(-8 to 27)    | 23<br>(10 to 40) | 24<br>(11 to 42)  | 17<br>(6 to 30) | 8<br>(-1 to 18)  |
| 16 | Non-                     | <i>consumer behavior</i>  | 24<br>(-5 to 61)  | 2<br>(-14 to 21)   | 10<br>(0 to 21)   | 4<br>(-3 to 14)    | 12<br>(4 to 23)  | 3<br>(-3 to 10)   | 2<br>(-2 to 6)  | 2<br>(0 to 3)    |
| 17 | Hispanic Black           | <i>+industry response</i> | 40<br>(10 to 80)  | 9<br>(-7 to 31)    | 14<br>(4 to 27)   | 6<br>(-1 to 17)    | 15<br>(7 to 26)  | 4<br>(-2 to 12)   | 3<br>(0 to 7)   | 2<br>(1 to 4)    |
| 18 |                          | <i>consumer behavior</i>  | 28<br>(2 to 63)   | 33<br>(-8 to 85)   | 9<br>(-4 to 23)   | 12<br>(-2 to 30)   | 2<br>(-4 to 10)  | 6<br>(1 to 13)    | 2<br>(-1 to 6)  | 0<br>(-2 to 3)   |
| 19 | Hispanic                 | <i>+industry response</i> | 45<br>(16 to 83)  | 51<br>(9 to 106)   | 13<br>(1 to 28)   | 16<br>(3 to 35)    | 4<br>(-2 to 13)  | 8<br>(3 to 16)    | 4<br>(0 to 8)   | 1<br>(-1 to 4)   |
| 20 |                          | <i>consumer behavior</i>  | 0<br>(-10 to 16)  | 2<br>(-5 to 12)    | 5<br>(1 to 11)    | 0<br>(-2 to 2)     | 3<br>(0 to 6)    | 2<br>(1 to 4)     | 0<br>(-1 to 1)  | 0<br>(-1 to 2)   |
| 21 | Other                    | <i>+industry response</i> | 4<br>(-6 to 21)   | 5<br>(-2 to 15)    | 6<br>(2 to 12)    | 0<br>(-1 to 3)     | 4<br>(1 to 7)    | 3<br>(1 to 5)     | 0<br>(-1 to 2)  | 1<br>(-1 to 2)   |
| 22 |                          |                           |                   |                    |                   |                    |                  |                   |                 |                  |
| 23 | <b>Advanced Prostate</b> |                           |                   |                    |                   |                    |                  |                   |                 |                  |
| 24 | Age                      | <i>consumer behavior</i>  | 101 (13 to 214)   |                    | 18 (-17 to 58)    |                    | 33 (11 to 58)    |                   | 15 (-4 to 38)   |                  |
| 25 |                          |                           |                   |                    |                   |                    |                  |                   |                 |                  |
| 26 |                          |                           |                   |                    |                   |                    |                  |                   |                 |                  |
| 27 |                          |                           |                   |                    |                   |                    |                  |                   |                 |                  |
| 28 |                          |                           |                   |                    |                   |                    |                  |                   |                 |                  |
| 29 |                          |                           |                   |                    |                   |                    |                  |                   |                 |                  |
| 30 |                          |                           |                   |                    |                   |                    |                  |                   |                 |                  |
| 31 |                          |                           |                   |                    |                   |                    |                  |                   |                 |                  |
| 32 |                          |                           |                   |                    |                   |                    |                  |                   |                 |                  |
| 33 |                          |                           |                   |                    |                   |                    |                  |                   |                 |                  |
| 34 |                          |                           |                   |                    |                   |                    |                  |                   |                 |                  |
| 35 |                          |                           |                   |                    |                   |                    |                  |                   |                 |                  |
| 36 |                          |                           |                   |                    |                   |                    |                  |                   |                 |                  |
| 37 |                          |                           |                   |                    |                   |                    |                  |                   |                 |                  |
| 38 |                          |                           |                   |                    |                   |                    |                  |                   |                 |                  |
| 39 |                          |                           |                   |                    |                   |                    |                  |                   |                 |                  |
| 40 |                          |                           |                   |                    |                   |                    |                  |                   |                 |                  |
| 41 |                          |                           |                   |                    |                   |                    |                  |                   |                 |                  |
| 42 |                          |                           |                   |                    |                   |                    |                  |                   |                 |                  |
| 43 |                          |                           |                   |                    |                   |                    |                  |                   |                 |                  |
| 44 |                          |                           |                   |                    |                   |                    |                  |                   |                 |                  |
| 45 |                          |                           |                   |                    |                   |                    |                  |                   |                 |                  |
| 46 |                          |                           |                   |                    |                   |                    |                  |                   |                 |                  |
| 47 |                          |                           |                   |                    |                   |                    |                  |                   |                 |                  |



|    |                |                           |                 |                 |                |                |               |               |               |               |
|----|----------------|---------------------------|-----------------|-----------------|----------------|----------------|---------------|---------------|---------------|---------------|
| 1  |                | <i>+industry response</i> | 174 (80 to 304) |                 | 37 (1 to 83)   |                | 43 (22 to 71) |               | 24 (6 to 48)  |               |
| 2  | Race/Ethnicity |                           |                 |                 |                |                |               |               |               |               |
| 3  | Non-           |                           |                 |                 |                |                |               |               |               |               |
| 4  | Hispanic       | <i>consumer behavior</i>  | 0               | 43 (-13 to 140) | 0              | 0 (-29 to 35)  | 0             | 20 (3 to 42)  | 0             | 10 (-9 to 32) |
| 5  | White          |                           |                 |                 |                |                |               |               |               |               |
| 6  |                | <i>+industry response</i> | 0               | 82 (16 to 192)  | 0              | 11 (-17 to 50) | 0             | 27 (10 to 51) | 0             | 16 (-2 to 40) |
| 7  | Non-           | <i>consumer behavior</i>  | 0               | 2 (-31 to 51)   | 0              | 9 (-7 to 30)   | 0             | 7 (-5 to 20)  | 0             | 4 (1 to 9)    |
| 8  | Hispanic Black |                           |                 |                 |                |                |               |               |               |               |
| 9  |                | <i>+industry response</i> | 0               | 17 (-16 to 75)  | 0              | 13 (-2 to 36)  | 0             | 9 (-3 to 23)  | 0             | 6 (2 to 11)   |
| 10 | Hispanic       | <i>consumer behavior</i>  | 0               | 47 (7 to 103)   | 0              | 7 (-2 to 20)   | 0             | 4 (1 to 9)    | 0             | 0 (-1 to 3)   |
| 11 |                | <i>+industry response</i> | 0               | 64 (23 to 127)  | 0              | 10 (1 to 25)   | 0             | 6 (2 to 11)   | 0             | 1 (-1 to 3)   |
| 12 | Other          | <i>consumer behavior</i>  | 0               | 1 (-4 to 12)    | 0              | 0 (-2 to 3)    | 0             | 1 (0 to 2)    | 0             | 0 (-1 to 2)   |
| 13 |                | <i>+industry response</i> | 0               | 2 (-1 to 16)    | 0              | 0 (-2 to 3)    | 0             | 1 (1 to 2)    | 0             | 1 (-1 to 2)   |
| 14 |                |                           |                 |                 |                |                |               |               |               |               |
| 15 |                |                           |                 |                 |                |                |               |               |               |               |
| 16 |                |                           |                 |                 |                |                |               |               |               |               |
| 17 |                |                           |                 |                 |                |                |               |               |               |               |
| 18 |                |                           |                 |                 |                |                |               |               |               |               |
| 19 |                |                           |                 |                 |                |                |               |               |               |               |
| 20 | <b>Ovarian</b> |                           |                 |                 |                |                |               |               |               |               |
| 21 | Age            | <i>consumer behavior</i>  | 45 (-3 to 114)  |                 | 13 (-14 to 54) |                | 24 (9 to 51)  |               | 21 (8 to 46)  |               |
| 22 |                | <i>+industry response</i> | 87 (19 to 175)  |                 | 25 (-4 to 75)  |                | 34 (14 to 64) |               | 28 (15 to 56) |               |
| 23 |                |                           |                 |                 |                |                |               |               |               |               |
| 24 | Race/Ethnicity |                           |                 |                 |                |                |               |               |               |               |
| 25 | Non-           |                           |                 |                 |                |                |               |               |               |               |
| 26 | Hispanic       | <i>consumer behavior</i>  | 21 (-15 to 89)  | 0               | -3 (-29 to 38) | 0              | 15 (2 to 41)  | 0             | 19 (6 to 43)  | 0             |
| 27 | White          |                           |                 |                 |                |                |               |               |               |               |
| 28 |                | <i>+industry response</i> | 45 (-10 to 131) | 0               | 5 (-21 to 52)  | 0              | 22 (5 to 51)  | 0             | 25 (11 to 52) | 0             |
| 29 | Non-           | <i>consumer behavior</i>  | 7 (-3 to 27)    | 0               | 3 (0 to 11)    | 0              | 5 (2 to 11)   | 0             | 1 (-1 to 4)   | 0             |
| 30 | Hispanic Black |                           |                 |                 |                |                |               |               |               |               |
| 31 |                | <i>+industry response</i> | 13 (-1 to 38)   | 0               | 5 (1 to 13)    | 0              | 7 (3 to 13)   | 0             | 1 (0 to 5)    | 0             |
| 32 | Hispanic       | <i>consumer behavior</i>  | 15 (0 to 48)    | 0               | 6 (-1 to 16)   | 0              | 1 (-2 to 6)   | 0             | 1 (-1 to 4)   | 0             |
| 33 |                | <i>+industry response</i> | 25 (2 to 64)    | 0               | 8 (2 to 20)    | 0              | 2 (-1 to 8)   | 0             | 2 (0 to 5)    | 0             |
| 34 | Other          | <i>consumer behavior</i>  | -5 (-13 to 9)   | 0               | 5 (1 to 10)    | 0              | 2 (0 to 4)    | 0             | 0 (-1 to 1)   | 0             |
| 35 |                | <i>+industry response</i> | -1 (-9 to 15)   | 0               | 5 (2 to 11)    | 0              | 2 (1 to 4)    | 0             | 0 (0 to 1)    | 0             |
| 36 |                |                           |                 |                 |                |                |               |               |               |               |
| 37 |                |                           |                 |                 |                |                |               |               |               |               |
| 38 |                |                           |                 |                 |                |                |               |               |               |               |
| 39 |                |                           |                 |                 |                |                |               |               |               |               |
| 40 |                |                           |                 |                 |                |                |               |               |               |               |
| 41 |                |                           |                 |                 |                |                |               |               |               |               |
| 42 |                |                           |                 |                 |                |                |               |               |               |               |
| 43 |                |                           |                 |                 |                |                |               |               |               |               |
| 44 |                |                           |                 |                 |                |                |               |               |               |               |
| 45 |                |                           |                 |                 |                |                |               |               |               |               |
| 46 |                |                           |                 |                 |                |                |               |               |               |               |
| 47 |                |                           |                 |                 |                |                |               |               |               |               |

| <b>Thyroid</b> |                       |                           |              |              |              |              |             |             |            |             |
|----------------|-----------------------|---------------------------|--------------|--------------|--------------|--------------|-------------|-------------|------------|-------------|
| 1              | <b>Age</b>            | <i>consumer behavior</i>  | 9 (2 to 22)  |              | 3 (-4 to 11) |              | 6 (3 to 12) |             | 4 (1 to 7) |             |
| 2              |                       | <i>+industry response</i> | 16 (7 to 33) |              | 6 (0 to 16)  |              | 9 (5 to 15) |             | 5 (3 to 9) |             |
| 3              | <b>Race/Ethnicity</b> |                           |              |              |              |              |             |             |            |             |
| 4              | Non-Hispanic White    | <i>consumer behavior</i>  | 0 (0 to 2)   | 0 (-1 to 5)  | 0 (-1 to 1)  | -2 (-7 to 5) | 0 (0 to 1)  | 3 (0 to 8)  | 1 (0 to 4) | 1 (-1 to 3) |
| 5              |                       | <i>+industry response</i> | 0 (0 to 3)   | 1 (0 to 9)   | 0 (-1 to 2)  | 0 (-5 to 9)  | 1 (0 to 2)  | 4 (1 to 10) | 2 (1 to 4) | 1 (0 to 4)  |
| 6              | Non-Hispanic Black    | <i>consumer behavior</i>  | 1 (0 to 5)   | 1 (-2 to 7)  | 0 (0 to 1)   | 0 (0 to 2)   | 1 (0 to 2)  | 0 (0 to 1)  | 0 (0 to 1) | 0 (0 to 1)  |
| 7              |                       | <i>+industry response</i> | 2 (0 to 7)   | 2 (-1 to 10) | 0 (0 to 2)   | 0 (0 to 2)   | 1 (0 to 2)  | 0 (0 to 1)  | 0 (0 to 1) | 0 (0 to 1)  |
| 8              | Hispanic              | <i>consumer behavior</i>  | 3 (0 to 10)  | 1 (0 to 9)   | 1 (0 to 3)   | 2 (0 to 5)   | 0 (0 to 1)  | 1 (0 to 2)  | 0 (0 to 1) | 0 (0 to 1)  |
| 9              |                       | <i>+industry response</i> | 5 (1 to 14)  | 2 (0 to 12)  | 1 (0 to 4)   | 2 (1 to 7)   | 0 (0 to 1)  | 1 (0 to 3)  | 1 (0 to 2) | 0 (0 to 1)  |
| 10             | Other                 | <i>consumer behavior</i>  | 0            | 0 (-1 to 3)  | 0 (0 to 1)   | 0 (-1 to 1)  | 0 (0 to 1)  | 0 (0 to 1)  | 0          | 0 (0 to 1)  |
| 11             |                       | <i>+industry response</i> | 0            | 0 (0 to 4)   | 0 (0 to 1)   | 0 (-1 to 2)  | 0 (0 to 1)  | 0 (0 to 1)  | 0          | 0 (0 to 1)  |

1. Values are the median estimates (95% uncertainty intervals) of each distribution of 1000 simulations.

1  
2  
3  
4  
5  
6  
7  
8  
9  
10  
11  
12  
13  
14  
15  
16  
17  
18  
19  
20  
21  
22  
23  
24  
25  
26  
27  
28  
29  
30  
31  
32  
33  
34  
35  
36  
37  
38  
39  
40  
41  
42  
43  
44  
45  
46  
47

**Supplementary Table 12.** Estimated health gains and costs associated with the federal menu calorie labeling on reducing cancer burdens in the US over a lifetime, one-way sensitivity analyses at 25% and 75% calorie compensation outside restaurant settings (US population=235,162,844)<sup>1</sup>

|                                             | Menu Calorie Labeling Policy                |                                                                    |                                             |                                                                    |
|---------------------------------------------|---------------------------------------------|--------------------------------------------------------------------|---------------------------------------------|--------------------------------------------------------------------|
|                                             | 75% Compensation                            |                                                                    | 25% Compensation                            |                                                                    |
|                                             | Consumer Behavior<br>Median (2.5% to 97.5%) | Consumer Behavior +<br>Industry Response<br>Median (2.5% to 97.5%) | Consumer Behavior<br>Median (2.5% to 97.5%) | Consumer Behavior +<br>Industry Response<br>Median (2.5% to 97.5%) |
| <b>New Cancer Cases Averted, N (95% UI)</b> |                                             |                                                                    |                                             |                                                                    |
| Liver cancer                                | 2550 (265 to 5030)                          | 4280 (2000 to 6770)                                                | 7760 (5160 to 10500)                        | 12800 (9790 to 16000)                                              |
| Endometrial cancer                          | 2490 (-633 to 5890)                         | 4640 (1570 to 8070)                                                | 8890 (5500 to 12700)                        | 15100 (11800 to 19100)                                             |
| Kidney cancer                               | 2360 (65 to 4510)                           | 4160 (1900 to 6410)                                                | 7810 (5230 to 10000)                        | 13000 (10400 to 15300)                                             |
| Breast cancer (postmenopausal)              | 2060 (-616 to 5280)                         | 3930 (1260 to 7200)                                                | 7640 (4560 to 11400)                        | 13000 (9700 to 17200)                                              |
| Pancreatic cancer                           | 638 (51 to 1280)                            | 1140 (536 to 1800)                                                 | 2140 (1490 to 2890)                         | 3590 (2840 to 4460)                                                |
| Esophageal adenocarcinoma                   | 598 (-239 to 1400)                          | 1100 (262 to 1930)                                                 | 2130 (1200 to 3000)                         | 3560 (2600 to 4520)                                                |
| Colorectal cancer                           | 480 (56 to 940)                             | 851 (423 to 1330)                                                  | 1600 (1060 to 2140)                         | 2660 (2030 to 3310)                                                |
| Multiple myeloma                            | 343 (61 to 674)                             | 576 (281 to 950)                                                   | 1050 (677 to 1480)                          | 1730 (1240 to 2340)                                                |
| Stomach cancer (cardia)                     | 312 (-42 to 736)                            | 533 (192 to 998)                                                   | 994 (555 to 1530)                           | 1640 (1060 to 2300)                                                |
| Thyroid cancer                              | 185 (-70 to 498)                            | 406 (128 to 749)                                                   | 851 (473 to 1310)                           | 1470 (963 to 2100)                                                 |
| Gallbladder cancer                          | 165 (70 to 274)                             | 266 (167 to 378)                                                   | 468 (348 to 602)                            | 758 (626 to 912)                                                   |
| Advanced prostate cancer                    | 162 (-28 to 360)                            | 282 (87 to 493)                                                    | 519 (304 to 768)                            | 868 (603 to 1160)                                                  |
| Ovarian cancer                              | 65 (-17 to 179)                             | 119 (26 to 245)                                                    | 228 (96 to 398)                             | 384 (196 to 617)                                                   |
| Total                                       | 12700 (2430 to 24200)                       | 22600 (12400 to 34100)                                             | 42800 (30400 to 53900)                      | 71500 (59100 to 82800)                                             |
| <b>Cancer Deaths Prevented, N (95% UI)</b>  |                                             |                                                                    |                                             |                                                                    |
| Liver cancer                                | 2200 (199 to 4450)                          | 3750 (1720 to 5970)                                                | 6790 (4490 to 9270)                         | 11200 (8570 to 14100)                                              |
| Breast cancer (postmenopausal)              | 1140 (-958 to 3640)                         | 2420 (281 to 4990)                                                 | 4980 (2540 to 7860)                         | 8670 (6030 to 12000)                                               |
| Endometrial cancer                          | 980 (-69 to 2030)                           | 1710 (675 to 2770)                                                 | 3160 (2020 to 4450)                         | 5270 (4120 to 6630)                                                |
| Kidney cancer                               | 939 (94 to 1820)                            | 1630 (795 to 2520)                                                 | 3020 (2080 to 3930)                         | 4990 (4020 to 6020)                                                |
| Pancreatic cancer                           | 561 (54 to 1120)                            | 996 (473 to 1590)                                                  | 1870 (1300 to 2510)                         | 3130 (2480 to 3890)                                                |
| Esophageal adenocarcinoma                   | 503 (-224 to 1190)                          | 932 (203 to 1640)                                                  | 1820 (1010 to 2580)                         | 3050 (2220 to 3890)                                                |
| Colorectal cancer                           | 323 (41 to 640)                             | 571 (280 to 910)                                                   | 1080 (724 to 1440)                          | 1800 (1390 to 2240)                                                |
| Stomach cancer (cardia)                     | 264 (-32 to 623)                            | 446 (159 to 838)                                                   | 824 (454 to 1280)                           | 1360 (887 to 1910)                                                 |
| Multiple myeloma                            | 213 (45 to 411)                             | 350 (178 to 576)                                                   | 635 (419 to 897)                            | 1040 (757 to 1370)                                                 |
| Gallbladder cancer                          | 141 (60 to 234)                             | 226 (142 to 320)                                                   | 398 (300 to 512)                            | 644 (531 to 777)                                                   |
| Advanced prostate cancer                    | 80 (-12 to 179)                             | 135 (44 to 239)                                                    | 246 (144 to 373)                            | 410 (278 to 563)                                                   |
| Ovarian cancer                              | 49 (-7 to 123)                              | 87 (26 to 170)                                                     | 162 (76 to 270)                             | 272 (155 to 415)                                                   |
| Thyroid cancer                              | 11 (1 to 24)                                | 19 (8 to 33)                                                       | 34 (21 to 53)                               | 56 (39.9 to 81.8)                                                  |
| Total                                       | 7760 (1280 to 13900)                        | 13600 (7160 to 20100)                                              | 25600 (17900 to 32300)                      | 42500 (34600 to 49600)                                             |
| <b>Life Years Gained</b>                    | 34700 (5070 to 66300)                       | 62200 (32500 to 93500)                                             | 118000 (82400 to 151000)                    | 197000 (161000 to 232000)                                          |

|    |                                                                                  |                        |                         |                           |
|----|----------------------------------------------------------------------------------|------------------------|-------------------------|---------------------------|
| 1  |                                                                                  |                        |                         |                           |
| 2  |                                                                                  |                        |                         |                           |
| 3  | <b>QALYs Gained</b>                                                              | 51400 (9690 to 95700)  | 90500 (49300 to 135000) | 171000 (119000 to 218000) |
| 4  | <b>Changes in Health-Related Costs, Cancer Only (\$, millions)<sup>2,3</sup></b> |                        |                         | 284000 (234000 to 334000) |
| 5  | Healthcare (medical) cost                                                        | -693 (-1250 to -138)   | -1210 (-1770 to -660)   | -2270 (-2850 to -1640)    |
| 6  | Patient time cost                                                                | -47.9 (-90.0 to -11.9) | -83.6 (-126 to -47.3)   | -155 (-198 to -113)       |
| 7  | Productivity loss                                                                | -279 (-527 to -56.6)   | -490 (-743 to -271)     | -929 (-1170 to -673)      |
| 8  | <b>Policy Implementation Costs (\$, millions)<sup>2,3</sup></b>                  |                        |                         |                           |
| 9  | Government cost                                                                  | 18.5 (14.5 to 25.1)    | 18.5 (14.4 to 25.5)     | 18.5 (14.5 to 25.1)       |
| 10 | Administration                                                                   | 9.07 (8.61 to 9.56)    | 9.09 (8.62 to 9.55)     | 9.07 (8.61 to 9.56)       |
| 11 | Monitoring                                                                       | 9.40 (5.45 to 16.1)    | 9.38 (5.30 to 16.3)     | 9.40 (5.45 to 16.1)       |
| 12 | Industry cost                                                                    | 820 (762 to 889)       | 1120 (1040 to 1210)     | 820 (762 to 889)          |
| 13 | Compliance                                                                       | 820 (762 to 889)       | 823 (757 to 889)        | 820 (762 to 889)          |
| 14 | Reformulation                                                                    | -----                  | 296 (249 to 353)        | -----                     |
| 15 | <b>Net Costs, Cancer Only (\$, millions)<sup>2,3,4</sup></b>                     |                        |                         |                           |
| 16 | Societal perspective                                                             | -174 (-1032 to 639)    | -653 (-1510 to 164)     | -2520 (-3390 to -1590)    |
| 17 | Healthcare perspective                                                           | -674 (-1229 to -120)   | -1190 (-1750 to -639)   | -2250 (-2830 to -1620)    |
| 18 | <b>ICER (dollars/QALY)<sup>5</sup></b>                                           |                        |                         |                           |
| 19 | Societal perspective                                                             | Dominant               | Dominant                | Dominant                  |
| 20 | Healthcare perspective                                                           | Dominant               | Dominant                | Dominant                  |

20 Abbreviations: ICER, Incremental Cost-Effectiveness Ratio; QALY, quality-adjusted life years.

21 1. Values are the median estimates (95% uncertainty intervals) of each distribution of 1000 simulations.

22 2. Health-related costs were inflated to 2015 US dollars using the Personal Health Care (PHC) index. Policy intervention costs were inflated to 2015 US dollars using the Consumer

23 Price Index. Negative costs represent savings.

24 3. Costs are medians from 1000 simulations so may not add up to totals.

25 4. Net costs were calculated as policy costs minus health-related costs from reduced cancer burden. Societal perspective includes healthcare cost, patient time costs, productivity

26 costs, and policy implementation costs; government perspective included policy costs relevant to policy implementation and program monitoring and evaluation and medical costs.

27 5. ICER threshold was evaluated at \$150,000/QALY. Dominant represents less costly and more effective than the "no-policy intervention" scenario.

**Supplementary Table 13.** Estimated health gains and costs associated with the federal menu calorie labeling on reducing cancer burdens in the US over a lifetime, one-way sensitivity analysis, assuming all full-service and fast-food restaurants were covered by the policy (US population=235,162,844)<sup>1</sup>

|                                                                                  | Menu Calorie Labeling Policy                |                                                                 |
|----------------------------------------------------------------------------------|---------------------------------------------|-----------------------------------------------------------------|
|                                                                                  | Consumer Behavior<br>Median (2.5% to 97.5%) | Consumer Behavior + Industry Response<br>Median (2.5% to 97.5%) |
| <b>New Cancer Cases Averted, N (95% UI)</b>                                      |                                             |                                                                 |
| Liver cancer                                                                     | 7280 (4690 to 10100)                        | 11400 (8480 to 14400)                                           |
| Kidney cancer                                                                    | 6820 (4180 to 9460)                         | 11100 (8470 to 13700)                                           |
| Endometrial cancer                                                               | 5340 (1540 to 9220)                         | 10400 (6690 to 14300)                                           |
| Breast cancer (postmenopausal)                                                   | 4920 (1580 to 8420)                         | 9380 (5960 to 13100)                                            |
| Esophageal adenocarcinoma                                                        | 2060 (1170 to 3060)                         | 3260 (2310 to 4330)                                             |
| Pancreatic cancer                                                                | 1810 (1150 to 2600)                         | 3000 (2290 to 3870)                                             |
| Colorectal cancer                                                                | 1320 (772 to 1910)                          | 2200 (1600 to 2880)                                             |
| Stomach cancer (cardia)                                                          | 938 (531 to 1510)                           | 1480 (985 to 2140)                                              |
| Thyroid cancer                                                                   | 746 (430 to 1180)                           | 1270 (850 to 1820)                                              |
| Multiple myeloma                                                                 | 710 (377 to 1150)                           | 1270 (879 to 1820)                                              |
| Advanced prostate cancer                                                         | 430 (208 to 681)                            | 715 (461 to 1010)                                               |
| Gallbladder cancer                                                               | 329 (201 to 457)                            | 568 (435 to 708)                                                |
| Ovarian cancer                                                                   | 133 (20.9 to 292)                           | 263 (109 to 468)                                                |
| Total                                                                            | 32900 (20300 to 46000)                      | 56400 (43700 to 69300)                                          |
| <b>Cancer Deaths Prevented, N (95% UI)</b>                                       |                                             |                                                                 |
| Liver cancer                                                                     | 6460 (4170 to 8980)                         | 10000 (7480 to 12800)                                           |
| Breast cancer (postmenopausal)                                                   | 3410 (701 to 6280)                          | 6440 (3560 to 9750)                                             |
| Kidney cancer                                                                    | 2620 (1610 to 3620)                         | 4250 (3210 to 5300)                                             |
| Endometrial cancer                                                               | 1890 (654 to 3140)                          | 3610 (2390 to 4900)                                             |
| Esophageal adenocarcinoma                                                        | 1800 (1030 to 2670)                         | 2840 (2010 to 3750)                                             |
| Pancreatic cancer                                                                | 1580 (976 to 2250)                          | 2620 (1990 to 3380)                                             |
| Colorectal cancer                                                                | 923 (560 to 1310)                           | 1520 (1110 to 1970)                                             |
| Stomach cancer (cardia)                                                          | 785 (437 to 1270)                           | 1240 (812 to 1790)                                              |
| Multiple myeloma                                                                 | 431 (234 to 709)                            | 762 (524 to 1100)                                               |
| Gallbladder cancer                                                               | 275 (170 to 385)                            | 479 (366 to 601)                                                |
| Advanced prostate cancer                                                         | 219 (117 to 351)                            | 353 (233 to 506)                                                |
| Ovarian cancer                                                                   | 94 (18 to 197)                              | 185 (91 to 317)                                                 |
| Thyroid cancer                                                                   | 27 (13 to 45)                               | 45 (28 to 68)                                                   |
| Total                                                                            | 7760 (1280 to 13900)                        | 34400 (26800 to 42400)                                          |
| <b>Life Years Gained</b>                                                         | 97300 (62300 to 135000)                     | 162000 (126000 to 201000)                                       |
| <b>QALYs Gained</b>                                                              | 20500 (13100 to 28500)                      | 230000 (178000 to 287000)                                       |
| <b>Changes in Health-Related Costs, Cancer Only (\$, millions)<sup>2,3</sup></b> |                                             |                                                                 |

|                                                                 |                        |                        |
|-----------------------------------------------------------------|------------------------|------------------------|
| Healthcare (medical) cost                                       | -1820 (-2500 to -1180) | -3060 (-3740 to -2400) |
| Patient time cost                                               | -112 (-160 to -62.7)   | -197 (-245 to -148)    |
| Productivity loss                                               | -692 (-976 to -401)    | -1210 (-1490 to -916)  |
| <b>Policy Implementation Costs (\$, millions)<sup>2,3</sup></b> |                        |                        |
| Government cost                                                 | 18.4 (14.7 to 25.7)    | 18.4 (14.7 to 25.7)    |
| Administration                                                  | 9.06 (8.56 to 9.52)    | 9.07 (8.60 to 9.56)    |
| Monitoring                                                      | 9.32 (5.61 to 16.5)    | 9.37 (5.64 to 16.6)    |
| Industry cost                                                   | 821 (764 to 888)       | 1120 (1040 to 1200)    |
| Compliance                                                      | 821 (764 to 888)       | 821 (763 to 886)       |
| Reformulation                                                   | -----                  | 297 (248 to 350)       |
| <b>Net Costs, Cancer Only (\$, millions)<sup>2,3,4</sup></b>    |                        |                        |
| Societal perspective                                            | -1780 (-2790 to -831)  | -1030 (-1590 to -549)  |
| Healthcare perspective                                          | -1800 (-2470 to -1160) | -1670 (-2120 to -1270) |
| <b>ICER (dollars/QALY)<sup>5</sup></b>                          |                        |                        |
| Societal perspective                                            | Dominant               | Dominant               |
| Healthcare perspective                                          | Dominant               | Dominant               |

Abbreviations: ICER, Incremental Cost-Effectiveness Ratio; QALY, quality-adjusted life years.

1. Values are the median estimates (95% uncertainty intervals) of each distribution of 1000 simulations.

2. Health-related costs were inflated to 2015 US dollars using the Personal Health Care (PHC) index. Policy intervention costs were inflated to 2015 US dollars using the Consumer Price Index. Negative costs represent savings.

3. Costs are medians from 1000 simulations so may not add up to totals.

4. Net costs were calculated as policy costs minus health-related costs from reduced cancer burden. Societal perspective includes healthcare cost, patient time costs, productivity costs, and policy implementation costs; government perspective included policy costs relevant to policy implementation and program monitoring and evaluation and medical costs.

5. ICER threshold was evaluated at \$150,000/QALY. Dominant represents less costly and more effective than the "no-policy intervention" scenario.

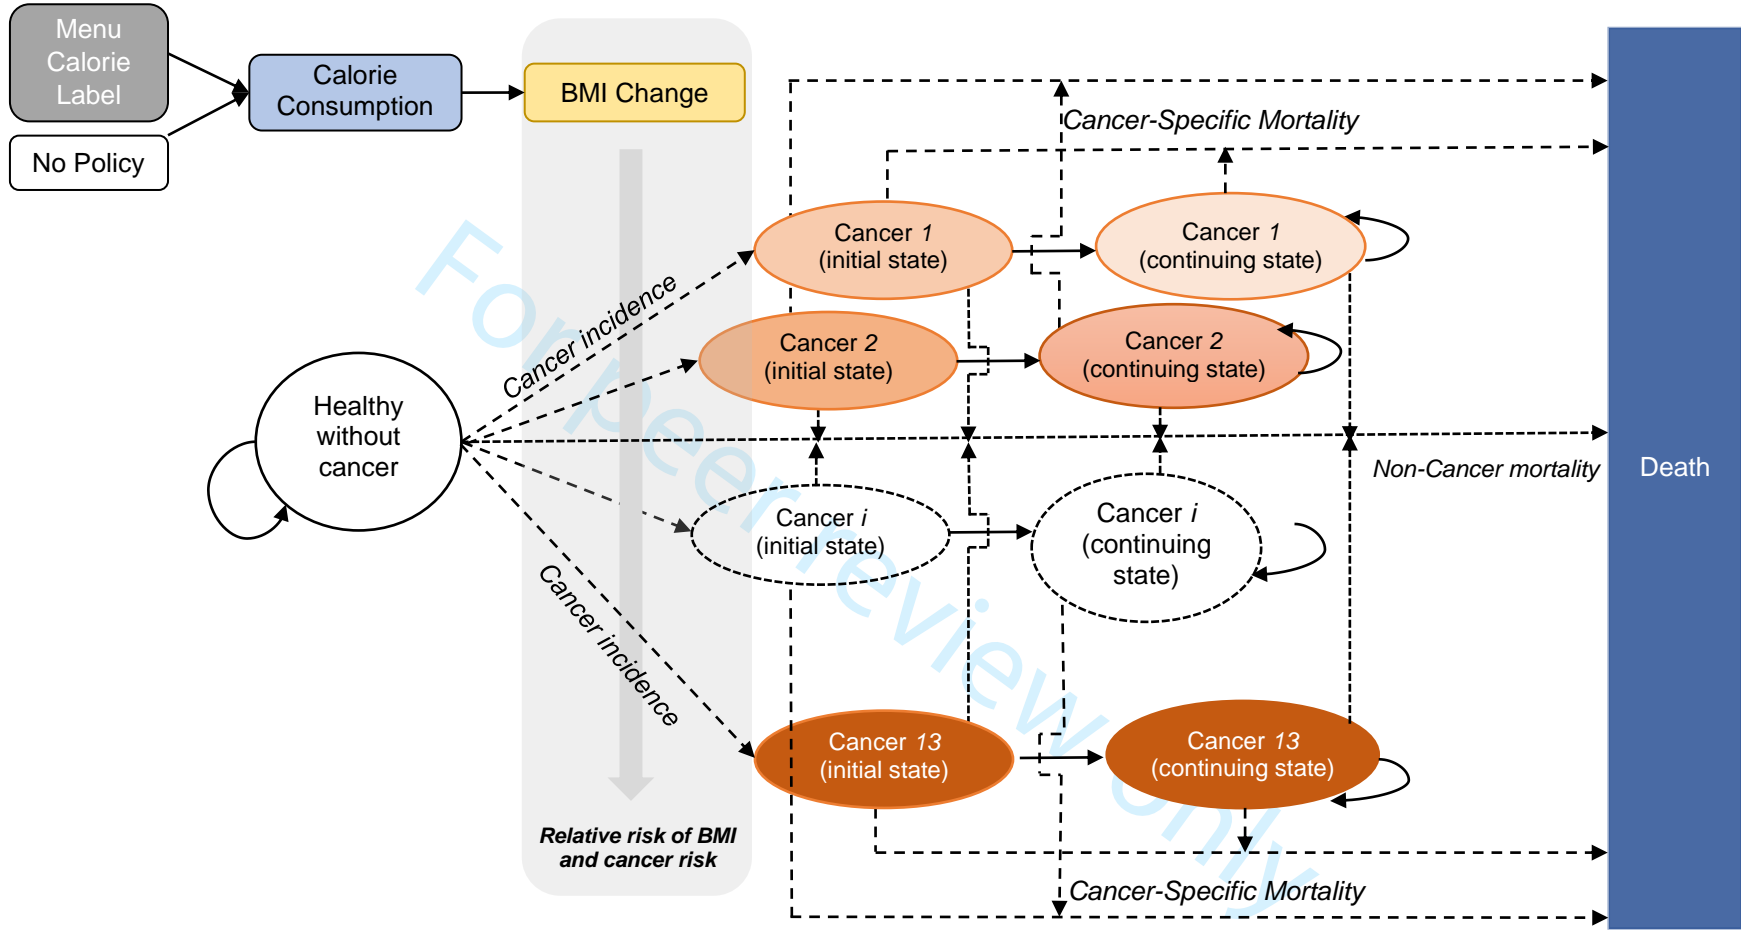

**Supplementary Figure 1. Diet and Cancer Outcome Model (DiCOM)**

The model consists of four general health states: (a) healthy without cancer (healthy state); (b) initial cancer diagnosis (initial state) for each cancer type  $i$ ; (c) continuing care (continuing state) for each cancer type  $i$ ; and (d) death state. Transitions between states are based on national cancer incidence and cancer-specific mortality rates from SEER (for individual with cancer) and lifetable-based mortality rates (for individuals without cancer). The model simulates the policy impact on the number of new cases and deaths of 13 obesity-associated cancers, health-related quality of life (HRQOL), and health-related costs among U.S. adults over a lifetime by comparing a policy scenario (menu calorie label) to a non-policy scenario (status quo).

1  
2  
3  
4  
5  
6  
7  
8  
9  
10  
11  
12  
13  
14  
15  
16  
17  
18  
19  
20  
21  
22  
23  
24  
25  
26  
27  
28  
29  
30  
31  
32  
33  
34  
35  
36  
37  
38  
39  
40  
41  
42  
43  
44  
45  
46  
47

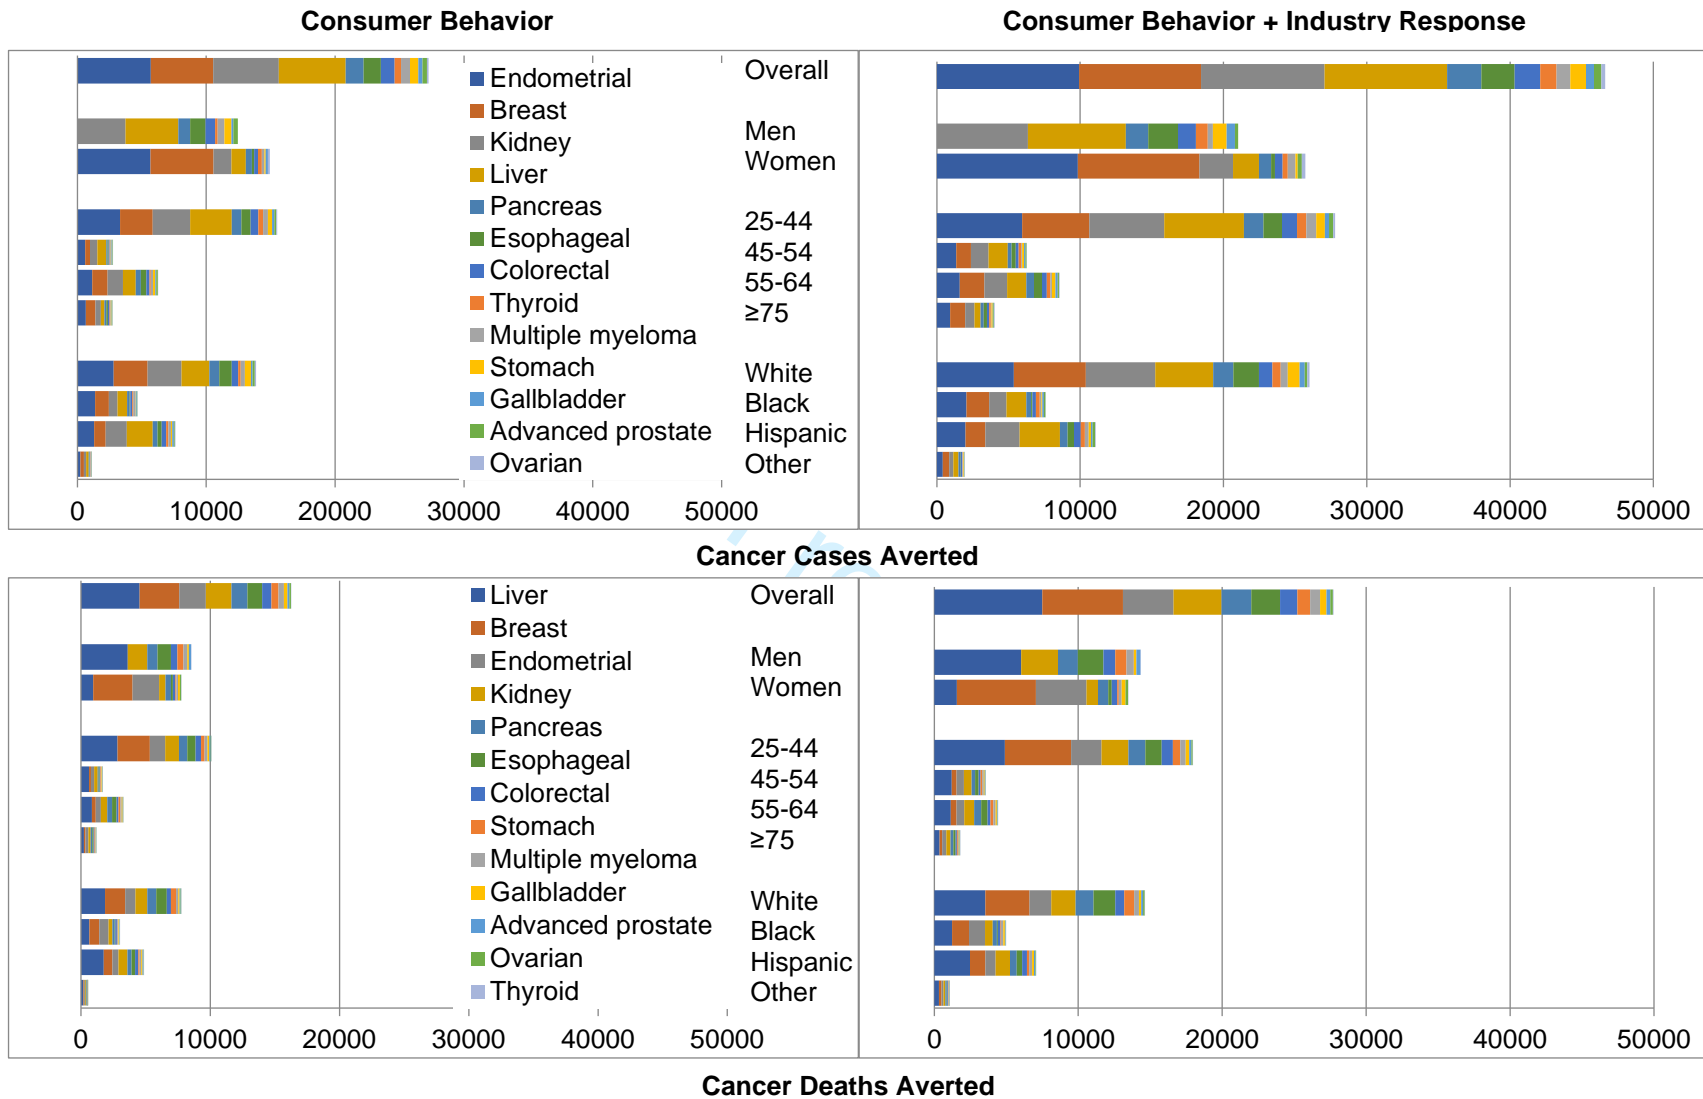

**Supplementary Figure 2.** Estimated reduced new cancer cases and deaths associated with the federal menu calorie labeling in the US by age, sex, race/ethnicity, and cancer type, over lifetime



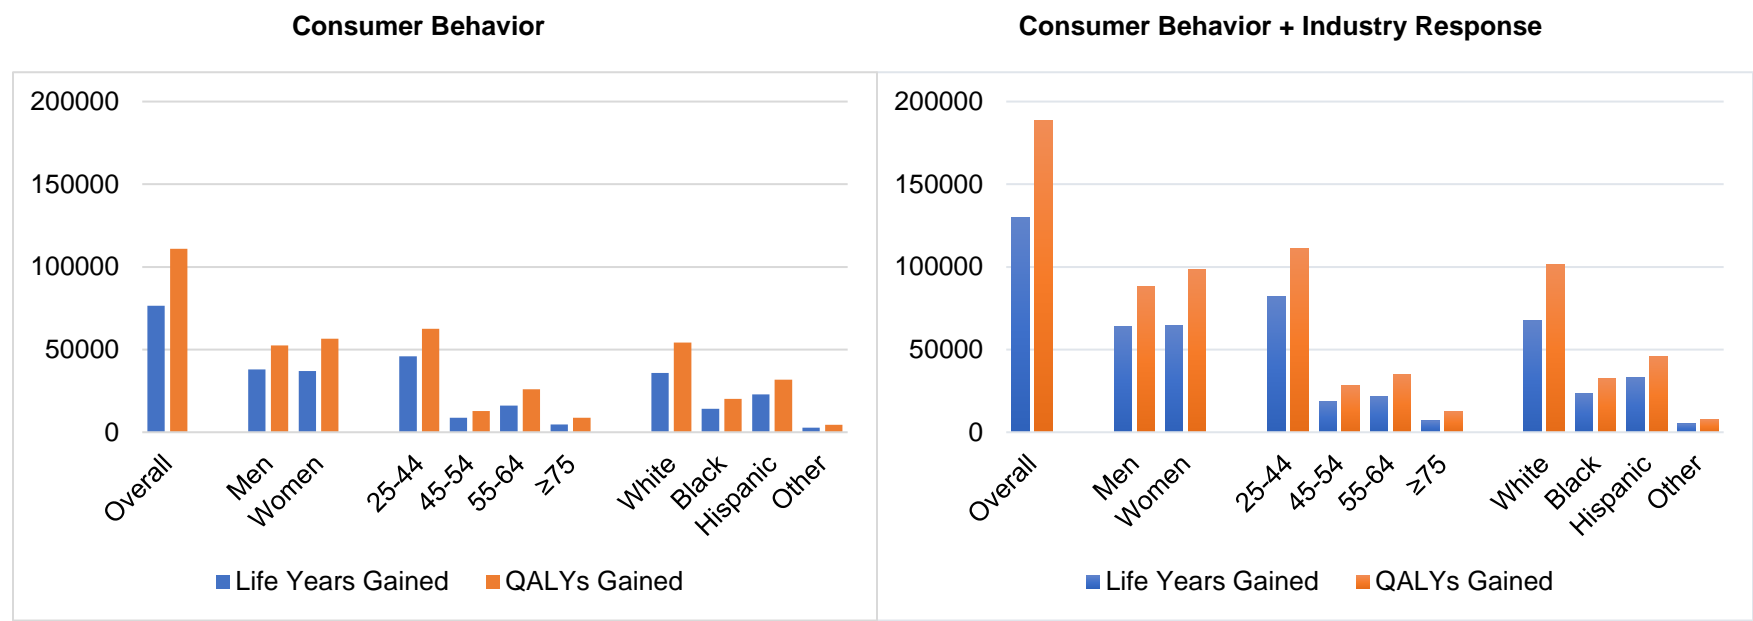

**Supplementary Figure 3.** Estimated life years and QALYs gained associated with the federal menu calorie labeling in the US by age, sex, and race/ethnicity, over a lifetime

VIEW ONLY

1  
2  
3  
4  
5  
6  
7  
8  
9  
10  
11  
12  
13  
14  
15  
16  
17  
18  
19  
20  
21  
22  
23  
24  
25  
26  
27  
28  
29  
30  
31  
32  
33  
34  
35  
36  
37  
38  
39  
40  
41  
42  
43  
44  
45  
46  
47  
48  
49  
50  
51  
52  
53  
54  
55  
56  
57  
58  
59  
60

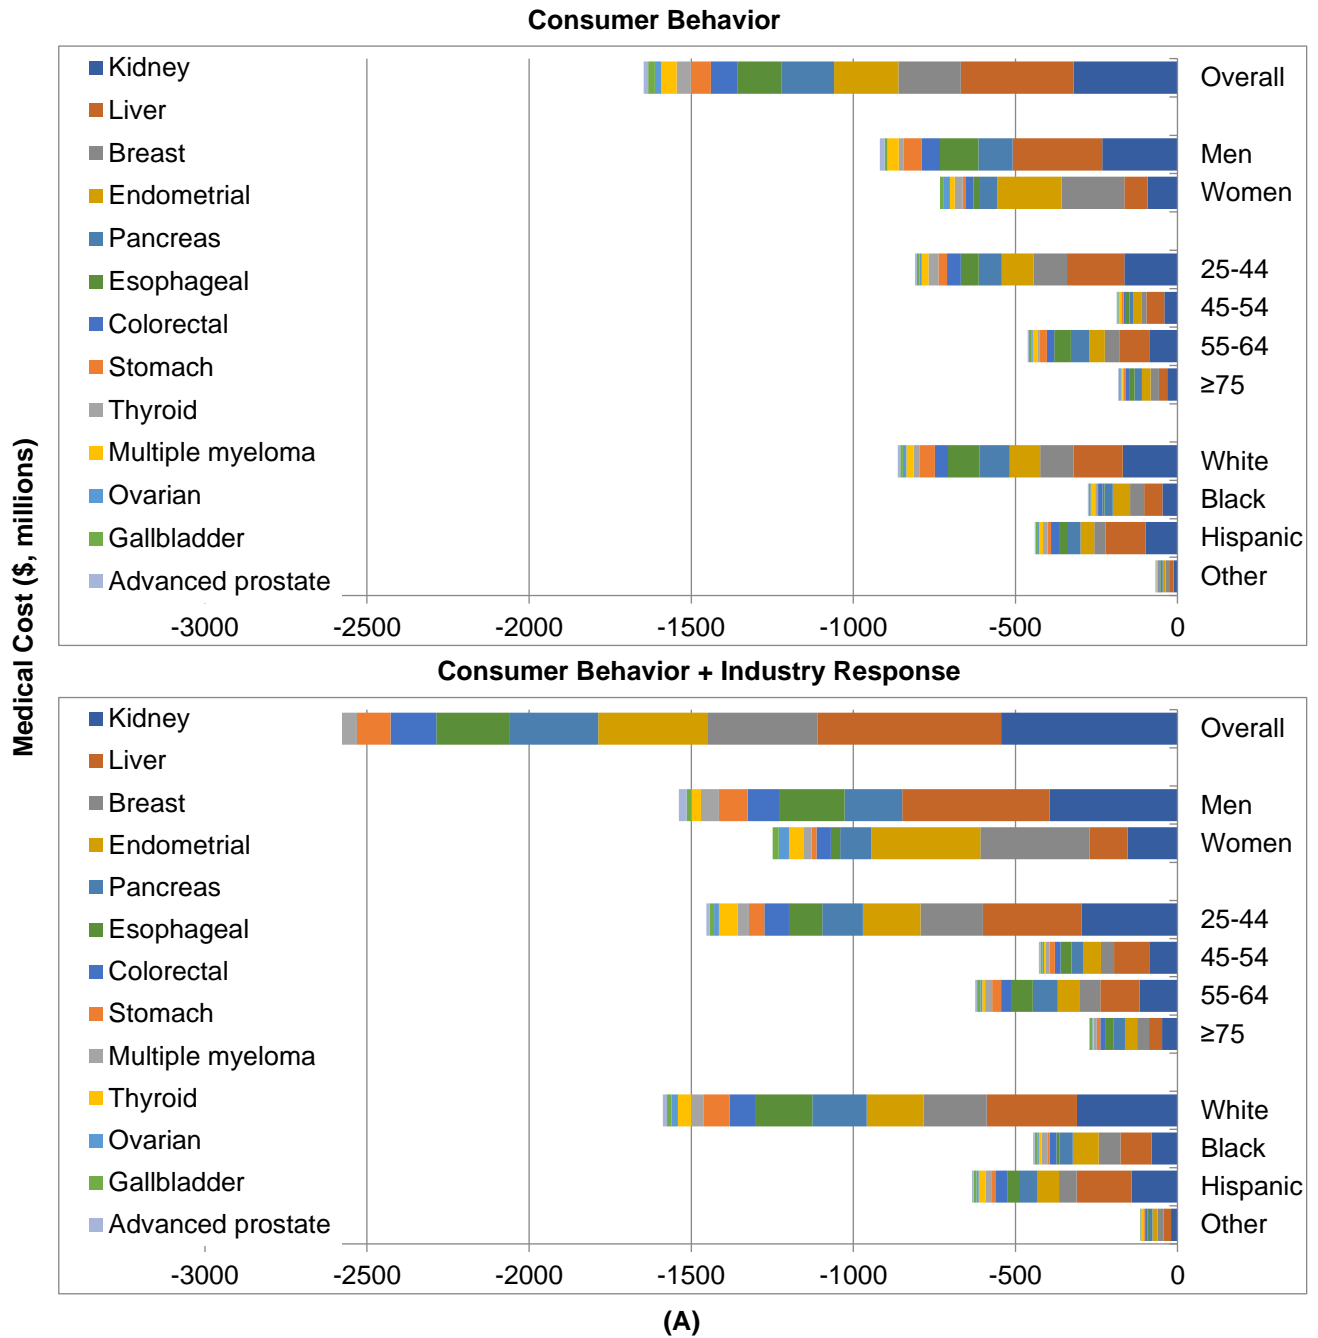

1  
2  
3  
4  
5  
6  
7  
8  
9  
10  
11  
12  
13  
14  
15  
16  
17  
18  
19  
20  
21  
22  
23  
24  
25  
26  
27  
28  
29  
30  
31  
32  
33  
34  
35  
36  
37  
38  
39  
40  
41  
42  
43  
44  
45  
46  
47  
48  
49  
50  
51  
52  
53  
54  
55  
56  
57  
58  
59  
60

### Consumer Behavior

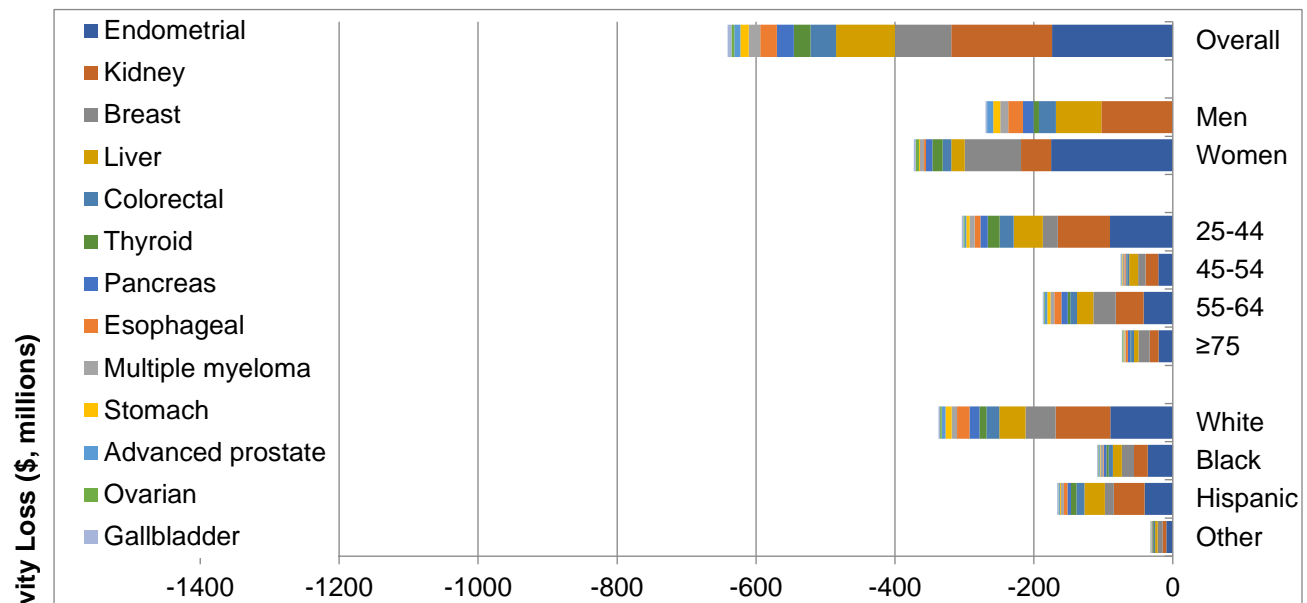

### Consumer Behavior + Industry Response

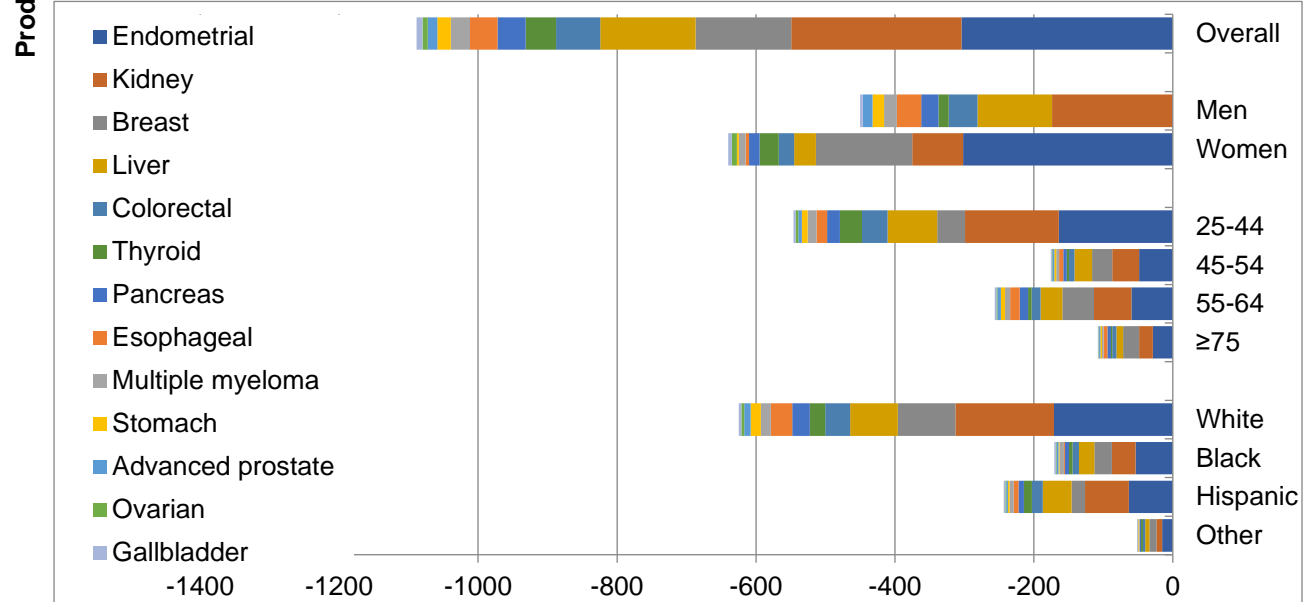

(B)

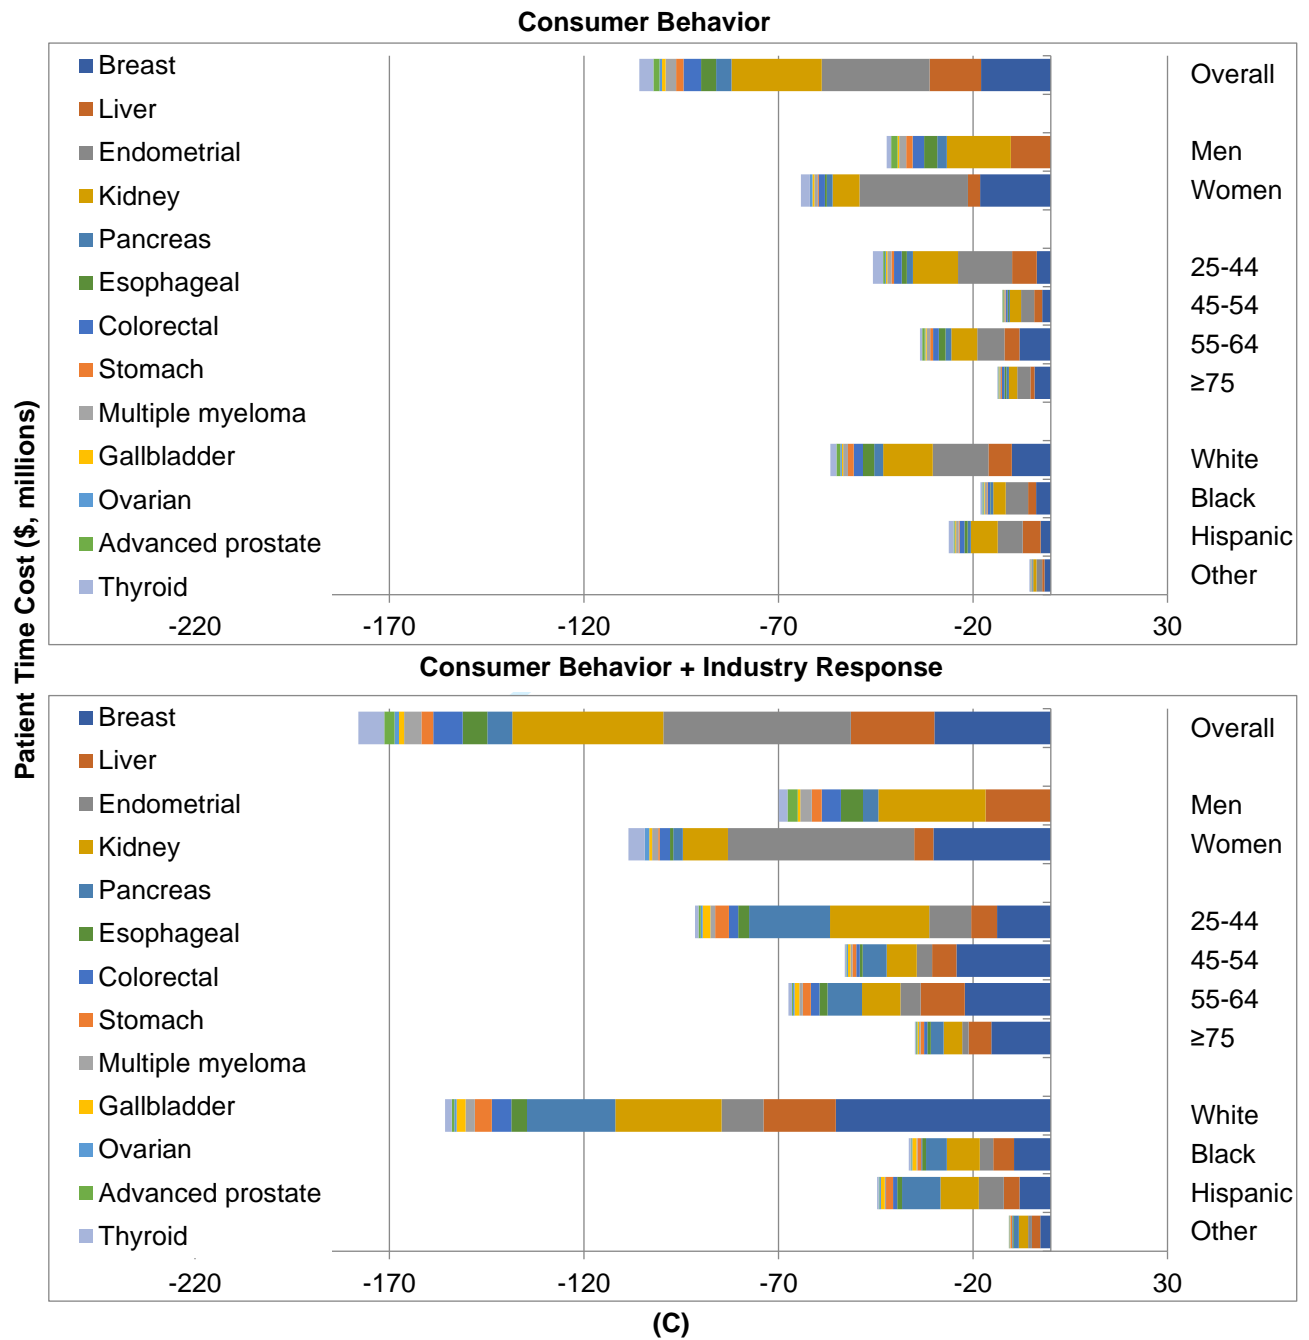

**Supplementary Figure 4.** Estimated changes of health-related costs associated with the federal menu calorie labeling in the US by age, sex, race/ethnicity, and cancer type, over lifetime

### Net Costs (\$ millions)

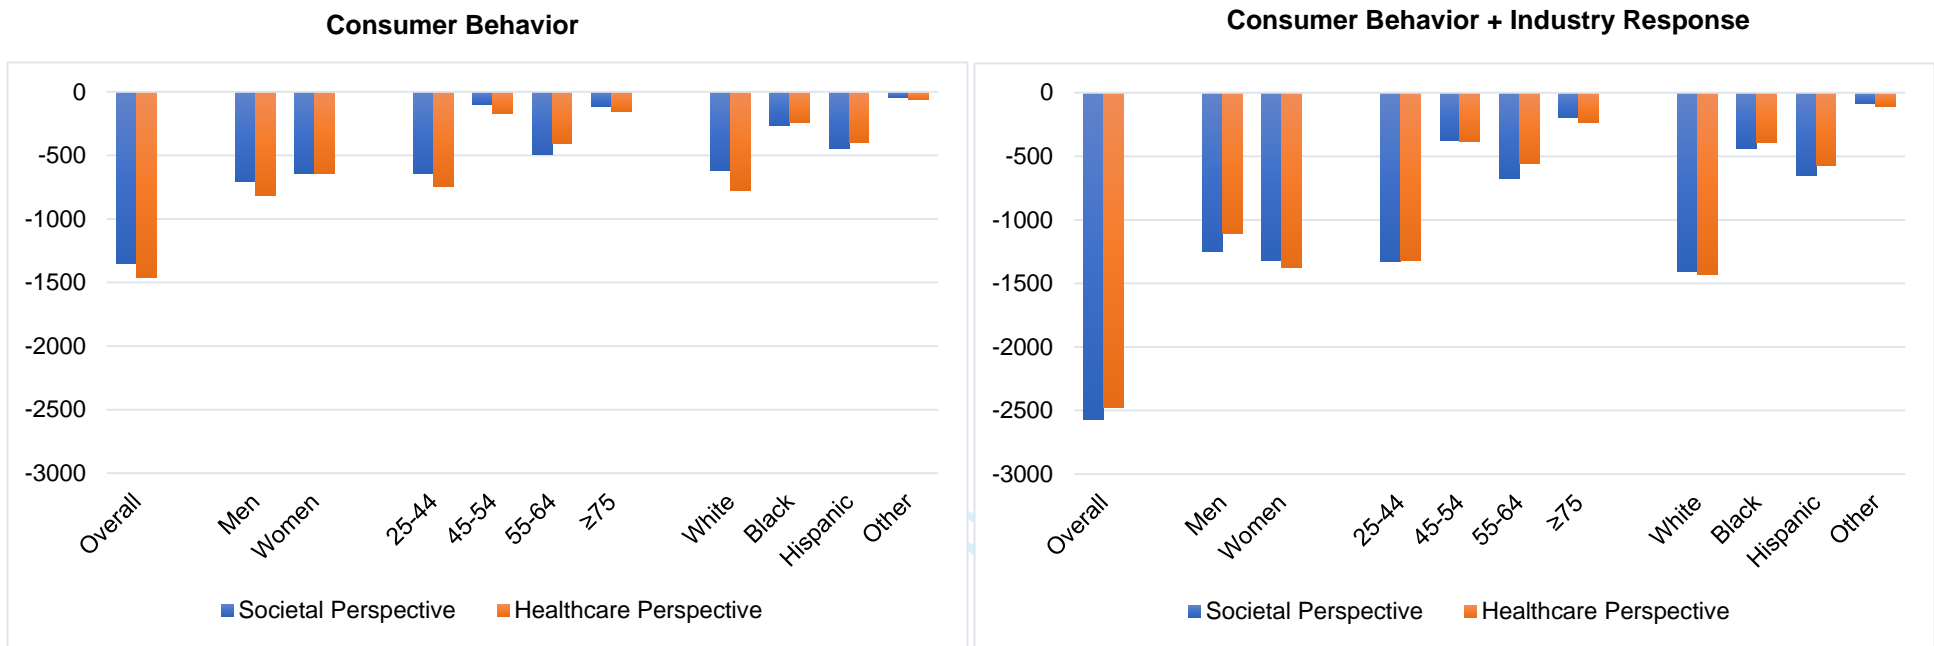

**Supplementary Figure 5.** Estimated net costs from societal and government perspectives associated with the federal menu calorie labeling policy in the US by age, sex, and race/ethnicity, over a lifetime

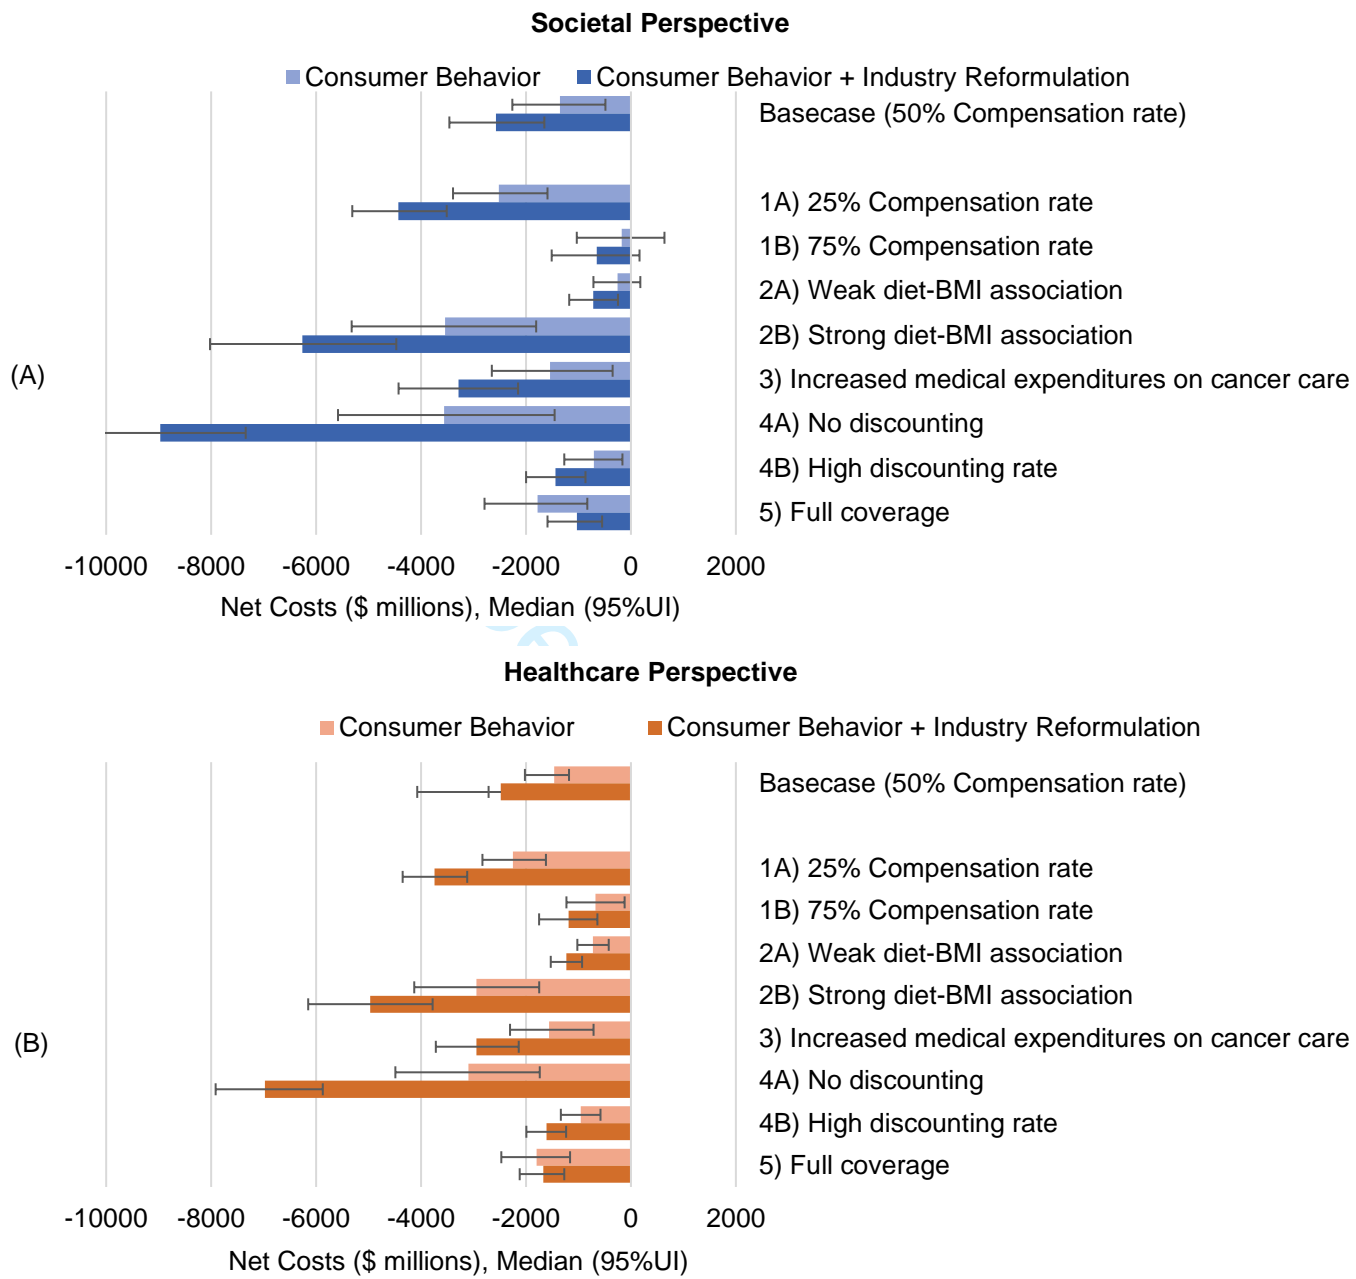

**Supplementary Figure 6.** One-Way Sensitivity Analysis of Net Costs of Menu Calorie Labeling and Obesity-Associated Cancer Rates by Varying Assumptions of Key Input Parameters From (A) Societal Perspective and (B) Healthcare Perspective

1a) assumed that only 25% of calorie reduction as a result of industry response would translate into long-term reductions in daily calories; 1b) assumed that only 75% of calorie reduction as a result of industry response would translate into long-term reductions in daily calories; 2a) weaker diet-BMI association assumed half of the base-case diet-BMI association; 2b) stronger diet-BMI association assumed two times of the base-case diet-BMI association; 3) 2% annual increase in medical expenditure on cancer care; 4a) lower discounting rate assumed 0% discounting rate; 4b) higher discounting rate assumed 5% discounting rate; and 5) assumed the coverage of the FDA's final rule increasing from 56.5% to 100% of the calories from full-service restaurants. Under base-case scenario (policy effect assumed consumer behavior: -7.3%, and industry reformulation: -5.0%; assumed that only 50% of calorie reduction as a result of industry response would translate into long-term reductions in daily calories; diet-BMI association assumed healthy-weight: 0.0015 kg/m<sup>2</sup> per kcal, and overweight/obese: 0.003 kg/m<sup>2</sup> per kcal; medical expenditure on cancer care assumed 0% annual increase; discounting rate assumed 3%; policy coverage would affect 56.5% of calories consumed at full-service restaurants and 100% of calories consumed at fast-food restaurants), the policy was cost-saving from both societal and healthcare perspectives. The policy remained cost-saving for all sensitivity analyses from the healthcare perspective and from societal perspective with additional industry reformulation. With consumer behavior alone, the policy was cost-saving under all scenarios.

1  
2  
3 **Title** Cost-Effectiveness Analysis of the Federal Menu Calorie Labeling and Obesity-Associated Cancer  
4 Burdens in the United States  
5

6  
7 **Appendix 1.** Estimate the Association Between Menu Calorie Labeling Policy and Calorie Intake from  
8 Restaurant Meals

9 **Appendix Table 1.** The Policy Impact of the Federal Menu Calorie Labeling on Restaurant Industry  
10 Response  
11

12 **Appendix 2.** Baseline Cancer Incidence and Methods of Cancer Incidence Projections for 13 Types of  
13 Cancers

14 **Appendix Table 2.** Estimating “crude” incidence after applying the cohort-period method  
15

16 **Appendix 3.** Cancer Survival for 13 Types of Cancers

17 **Appendix Table 3.** Period Method for 5-Year Relative Survival for 2014

18 **Appendix 4.** Methods of Estimating the Health-Related Quality of Life Among 13 Types of Cancers  
19

20 **Appendix 5.** Methods of Estimating Policy Implementation Costs

21 **Appendix Table 4.** Implementation Cost Estimates for the Federal Menu Calorie Labeling Policy (in  
22 2015 US Dollars)

23 **Appendix Table 5.** The Population Size of People Who are Alive Each Year Over a Lifetime (in  
24 millions)  
25

26 **Appendix 6.** Annual Health-Related Costs Among Cancer Patients and the General Population without  
27 Cancer

28 **Appendix Table 6.** Description of Data Source of Health-Related Expenditures  
29  
30  
31  
32  
33  
34  
35  
36  
37  
38  
39  
40  
41  
42  
43  
44  
45  
46  
47  
48  
49  
50  
51  
52  
53  
54  
55  
56  
57  
58  
59  
60

## Appendix 1. Estimate the association between menu calorie labeling policy and calorie intake from restaurant meals

To understand the effects of the federal menu calorie labeling policy, we performed a comprehensive literature search and reviewed the evidence on how the policy affected consumer behaviors and industry.

To estimate the policy effect on consumer behavior alone, we reviewed individual studies in both real-world and experimental settings as well as meta-analyses. A meta-analysis of natural experimental studies showed that menu calorie labeling was associated with a 7.3% (95% CI: 4.4% to 10.1%) reduction in calories per meal consumed/purchased.<sup>1</sup> This effect estimate is corresponding to an average reduction of 23.5 kcal per meal consumed by NHANES participants from 56.5% of full-service restaurants<sup>2</sup> and all fast-food restaurants. This estimate was consistent with evidence from a previous meta-analysis and a recent real-world study.<sup>3,4</sup> A previous meta-analysis estimated that the menu calorie labeling would lead to about an 18 kcal reduction ordered per meal.<sup>3</sup> A recent longitudinal study used data from a large restaurant franchise in the southern U.S. and estimated that, after labeling implementation, a decrease of 60 kcal per transaction was observed in the first year, followed by an increasing trend of 0.71 kcal per transaction per week over two years.<sup>4</sup> These together attenuated the calorie reduction to 23 kcal per transaction by the end of the third year of the policy implementation.<sup>5</sup> Compared to other studies, the 7.3% calorie reduction per meal represents a more conservative estimate. It was reported in a cross-sectional study that customers at the labeled full-service restaurants purchased food with 151 fewer calories.<sup>6</sup> One meta-analysis of studies that evaluated energy ordered in a real-world setting showed that the calorie labeling policy would lead to a mean reduction of 77.8 in calories purchased per meal.<sup>7</sup> In a laboratory setting, there was a significant reduction of 115.3 kcal per meal ordered.<sup>8</sup> Integrating both the real-world and experimental studies, the policy was estimated to generate



1  
2  
3 a significant reduction of 100.3 in calories purchased.<sup>7</sup> Therefore, we decided to use a reduction of  
4  
5 calorie intake per meal by 7.3% (95% CI: 4.4% to 10.1%) as the model input given it is the most  
6  
7 updated and conservative estimate supported by existing evidence. This policy effect on consumer  
8  
9 behavior alone was assumed to take effect during the first year of implementation and no further  
10  
11 reduction thereafter.  
12  
13

14  
15 Based on the published literature, we estimated that there was a 5% reduction in calories  
16  
17 consumed per meal from chain restaurants due to industry reformulation, the introduction of new low-  
18  
19 calorie menu items, or the replacement of menu items high in calories with low-calorie menu options.<sup>9-</sup>  
20  
21 <sup>13</sup> Bleich et al. estimated the calorie changes in chain restaurants' menu items using data from the largest  
22  
23 chain restaurants in the U.S.<sup>9-13</sup> Using the estimated mean calorie per menu item from the two published  
24  
25 studies shown in **Appendix Table 1**,<sup>11, 12</sup> we calculated the mean change in calories per menu item  
26  
27 before and after the policy implementation. Given the national law was announced in 2010, using data  
28  
29 from the trend analysis, we treated the mean calorie per menu item measured in 2008 as the baseline and  
30  
31 found there was an 11% reduction in calories per menu item two years after the affordable care act was  
32  
33 enacted. The change decreased to 7% in 2015, one year after the FDA announced the final rule for the  
34  
35 industry to comply with. In the study evaluated the calorie content in current menu items, eliminated  
36  
37 menu items, and newly introduced menu items, we estimated that there was a 1% reduction in mean per-  
38  
39 item calories in 2013-2014 compared to that in 2012, and the reduction increased to 5% in 2015. Based  
40  
41 on this de novo analysis, we chose a reduction in calories per meal consumed by 5% to represent a  
42  
43 modest industry reformulation in response to the federal menu calorie labeling by chain restaurants. We  
44  
45 assumed no industry response in the first year, then the reformulation activities would occur in the rest  
46  
47 of the years over the model lifetime, resulting in a net reduction of 5% in calories consumed per meal.  
48  
49  
50  
51  
52  
53  
54  
55  
56  
57  
58  
59  
60

**Appendix Table 1.** The policy impact of the federal menu calorie labeling on restaurant industry response

| Study                                                           |                               | Year  |                               |                                   |        |                               |
|-----------------------------------------------------------------|-------------------------------|-------|-------------------------------|-----------------------------------|--------|-------------------------------|
|                                                                 |                               | 2008  | 2012                          | 2013                              | 2014   | 2015                          |
| Bleich, 2017 <sup>11</sup>                                      | # of menu items (n)           | 6,601 | 9,526                         | 10,278                            | 10,654 | 11,034                        |
| Calorie changes in large chain restaurants from 2008 to 2015    | mean per-item calories (kcal) | 368.0 | 329.1                         | 330.1                             | 337.2  | 340.6                         |
| 44 of the 100 largest chain restaurants                         |                               |       |                               |                                   |        |                               |
|                                                                 | diff. (%)                     |       | 2012 vs. 2008<br>-38.9 (-11%) |                                   |        | 2015 vs. 2008<br>-27 (-7%)    |
| Bleich, 2018 <sup>12</sup>                                      | # of menu items (n)           |       | 14,705                        | 17,219 (2013-2014)                |        | 13,920                        |
| Higher-Calorie Menu Items Eliminated in Large Chain Restaurants | mean per-item calories (kcal) |       | 374.4                         | 370.9                             |        | 357.4                         |
| 66 of the 100 largest chain restaurants                         |                               |       |                               |                                   |        |                               |
|                                                                 | diff. (%)                     |       |                               | 2013-2014 vs. 2012<br>-3.52 (-1%) |        | 2015 vs. 2012<br>-17.05 (-5%) |

## Appendix 2. Baseline cancer incidence and methods of cancer incidence projections for 13 types of cancers

We estimated the cancer incidence rate projections for the defined 32 demographic subgroups as inputs for the DiCOM model. We first obtained age-adjusted incidence rates from 2006 to 2015 from the United States Cancer Statistics combining data from the Surveillance, Epidemiology, and End Results (SEER) database and the Centers for Disease Control and Prevention's National Program of Cancer Registries (NPCR) database.<sup>14</sup>

Based on the trends from 2006 to 2015, we projected age-adjusted cancer incidence rates in the next 15 years from 2016 to 2030 using the average annual percent change (AAPC) method.<sup>15, 16</sup> Because longer-term projections may not be valid, we chose to hold age-adjusted cancer incidence rates constant from 2030 to 2095. Specifically, the annual percent change was calculated for each cancer site in each of the 32 subgroups by fitting a regression line to the natural logarithm of the age-adjusted rates (I) in the years 2006 through 2015 (y). The equation for AAPC:  $\ln(I) = \alpha + \beta y$ , where  $\alpha$  and  $\beta$  were coefficients to be estimated and y is the calendar year.<sup>15, 16</sup> We then combined the AAPC projected cancer incidence rates with the projected US population to account for the change in population age distribution over time. The projected US population in each of the 32 subgroups from 2016 to 2060 were extracted from the National Interim Projections of the US population.<sup>17</sup> Because projections were only available through 2060, further projections after 2060 were not considered. We further applied the cohort-period method to estimate cancer incidence in each of the 32 subgroups in the closed cohort of US adults from 2015 to 2095 as they age. Details were illustrated in **Appendix Table 2** using colon and rectum cancer incidence among non-Hispanic white females (NHWF) as an example.

Appendix Table 2. Estimating “crude” incidence after applying cohort-period method

**EXAMPLE: Colon and Rectum Cancer, Non-Hispanic White Females**

| Age | 2015                    |                 |                          | 2016                                |                        |                               | 2017                     |                                     |                        | 2018                          |                          |                                     |                        |                               |
|-----|-------------------------|-----------------|--------------------------|-------------------------------------|------------------------|-------------------------------|--------------------------|-------------------------------------|------------------------|-------------------------------|--------------------------|-------------------------------------|------------------------|-------------------------------|
|     | Baseline Incidence Rate | Population Size | AAPC Predicted Incidence | US Census Predicted Population Size | Cancer Cases Predicted | Age Shifted “crude” Incidence | AAPC Predicted Incidence | US Census Predicted Population Size | Cancer Cases Predicted | Age Shifted “crude” Incidence | AAPC Predicted Incidence | US Census Predicted Population Size | Cancer Cases Predicted | Age Shifted “crude” Incidence |
| 20  | 8.531                   | 30523184        | 8.694                    | 1134235                             |                        | 10.64                         | 8.859                    | 126079                              |                        | 11.694                        | 9.028                    | 117775                              |                        | 13.82                         |
| 21  | 8.531                   |                 | 8.694                    | 156761                              | 100565                 |                               | 8.859                    | 197549                              |                        |                               | 9.028                    | 129379                              |                        |                               |
| 22  | 8.531                   |                 | 8.694                    | 177144                              | 102337                 |                               | 8.859                    | 159788                              | 102748                 |                               | 9.028                    | 140620                              |                        |                               |
| 23  | 8.531                   |                 | 8.694                    | 196469                              | 14017                  |                               | 8.859                    | 180122                              | 104550                 |                               | 9.028                    | 152784                              | 104976                 |                               |
| 24  | 8.531                   |                 | 8.694                    | 239910                              | 107707                 |                               | 8.859                    | 199459                              | 106263                 |                               | 9.028                    | 183136                              | 106813                 |                               |
| 25  | 8.531                   |                 | 8.694                    | 283513                              | 11685                  |                               | 8.859                    | 247139                              | 110009                 |                               | 9.028                    | 220329                              | 108546                 |                               |
| 26  | 8.531                   |                 | 8.694                    | 294013                              | 12497                  |                               | 8.859                    | 286229                              | 113950                 |                               | 9.028                    | 244499                              | 12353                  |                               |
| 27  | 8.531                   |                 | 8.694                    | 250740                              | 108735                 |                               | 8.859                    | 296475                              | 114858                 |                               | 9.028                    | 288797                              | 16352                  |                               |
| 28  | 8.531                   |                 | 8.694                    | 232421                              | 107143                 |                               | 8.859                    | 253062                              | 11012                  |                               | 9.028                    | 298770                              | 17252                  |                               |
| 29  | 8.531                   |                 | 8.694                    | 216039                              | 105719                 |                               | 8.859                    | 234519                              | 109369                 |                               | 9.028                    | 255161                              | 113315                 |                               |
| 30  | 8.531                   |                 | 8.694                    | 228929                              | 106839                 |                               | 8.859                    | 217844                              | 107892                 |                               | 9.028                    | 236330                              | 11615                  |                               |
| 31  | 8.531                   |                 | 8.694                    | 244281                              | 108174                 |                               | 8.859                    | 230337                              | 108999                 |                               | 9.028                    | 219132                              | 10079                  |                               |
| 32  | 8.531                   |                 | 8.694                    | 205955                              | 104842                 |                               | 8.859                    | 245249                              | 110320                 |                               | 9.028                    | 231390                              | 11169                  |                               |
| 33  | 8.531                   |                 | 8.694                    | 226950                              | 106667                 |                               | 8.859                    | 206736                              | 106908                 |                               | 9.028                    | 246013                              | 12489                  |                               |
| 34  | 8.531                   |                 | 8.694                    | 226234                              | 106605                 |                               | 8.859                    | 227540                              | 108751                 |                               | 9.028                    | 207377                              | 109001                 |                               |
| 35  | 8.531                   |                 | 8.694                    | 217701                              | 105863                 |                               | 8.859                    | 226721                              | 108678                 |                               | 9.028                    | 228051                              | 10868                  |                               |
| 36  | 8.531                   |                 | 8.694                    | 228467                              | 106799                 |                               | 8.859                    | 218111                              | 107918                 |                               | 9.028                    | 227199                              | 10791                  |                               |
| 37  | 8.531                   |                 | 8.694                    | 180971                              | 100931                 |                               | 8.859                    | 228796                              | 108862                 |                               | 9.028                    | 218528                              | 10008                  |                               |
| 38  | 8.531                   |                 | 8.694                    | 139547                              | 99069                  |                               | 8.859                    | 116267                              | 102879                 |                               | 9.028                    | 229044                              | 10958                  |                               |
| 39  | 8.531                   |                 | 8.694                    | 127605                              | 98030                  |                               | 8.859                    | 139679                              | 100967                 |                               | 9.028                    | 161414                              | 104852                 |                               |
| 40  | 8.531                   |                 | 8.694                    | 1088875                             | 94663                  |                               | 8.859                    | 127530                              | 99891                  |                               | 9.028                    | 139635                              | 102886                 |                               |
| 41  | 8.531                   |                 | 8.694                    | 190467                              | 98279                  |                               | 8.859                    | 1088644                             | 96446                  |                               | 9.028                    | 127272                              | 10770                  |                               |
| 42  | 8.531                   |                 | 8.694                    | 1101345                             | 95747                  |                               | 8.859                    | 129951                              | 100105                 |                               | 9.028                    | 1082229                             | 98245                  |                               |
| 43  | 8.531                   |                 | 8.694                    | 130264                              | 98262                  |                               | 8.859                    | 110015                              | 97506                  |                               | 9.028                    | 129228                              | 101946                 |                               |
| 44  | 8.531                   |                 | 8.694                    | 1210411                             | 105229                 |                               | 8.859                    | 129268                              | 100045                 |                               | 9.028                    | 1099713                             | 99282                  |                               |
| 45  | 41269                   | 14238423        | 41919                    | 139769                              | 553230                 | 43.775                        | 42.579                   | 1208976                             | 514771                 | 45.825                        | 43.250                   | 128045                              | 487878                 | 47.459                        |
| 46  | 41269                   |                 | 41919                    | 1346596                             | 564476                 |                               | 42.579                   | 137806                              | 561110                 |                               | 43.250                   | 207332                              | 522169                 |                               |
| 47  | 41269                   |                 | 41919                    | 1292274                             | 541705                 |                               | 42.579                   | 1344191                             | 572344                 |                               | 43.250                   | 1315541                             | 568969                 |                               |
| 48  | 41269                   |                 | 41919                    | 1264917                             | 530237                 |                               | 42.579                   | 1289694                             | 549140                 |                               | 43.250                   | 1341533                             | 580211                 |                               |
| 49  | 41269                   |                 | 41919                    | 1295410                             | 543019                 |                               | 42.579                   | 1262140                             | 537408                 |                               | 43.250                   | 1286923                             | 556592                 |                               |
| 50  | 41269                   |                 | 41919                    | 1325816                             | 555765                 |                               | 42.579                   | 1292230                             | 550220                 |                               | 43.250                   | 1259139                             | 544576                 |                               |
| 51  | 41269                   |                 | 41919                    | 1432079                             | 600309                 |                               | 42.579                   | 1322198                             | 562980                 |                               | 43.250                   | 1288813                             | 557410                 |                               |
| 52  | 41269                   |                 | 41919                    | 1489756                             | 624487                 |                               | 42.579                   | 1427705                             | 607904                 |                               | 43.250                   | 1318321                             | 570172                 |                               |
| 53  | 41269                   |                 | 41919                    | 1510286                             | 633093                 |                               | 42.579                   | 1484805                             | 632216                 |                               | 43.250                   | 1423107                             | 615492                 |                               |
| 54  | 41269                   |                 | 41919                    | 1532940                             | 642589                 |                               | 42.579                   | 1504858                             | 640755                 |                               | 43.250                   | 1499608                             | 639928                 |                               |
| 55  | 59.736                  | 1511568         | 58.496                   | 1575080                             | 921363                 | 65.864                        | 57.283                   | 1526976                             | 874691                 | 71.135                        | 56.094                   | 1461511                             | 840934                 | 75.804                        |
| 56  | 59.736                  |                 | 58.496                   | 1579128                             | 923731                 |                               | 57.283                   | 1568482                             | 898466                 |                               | 56.094                   | 1520747                             | 853048                 |                               |
| 57  | 59.736                  |                 | 58.496                   | 1554236                             | 909170                 |                               | 57.283                   | 1572018                             | 900492                 |                               | 56.094                   | 1561581                             | 875954                 |                               |
| 58  | 59.736                  |                 | 58.496                   | 1566074                             | 916095                 |                               | 57.283                   | 1546788                             | 886040                 |                               | 56.094                   | 1564631                             | 877664                 |                               |
| 59  | 59.736                  |                 | 58.496                   | 1559941                             | 912507                 |                               | 57.283                   | 1558015                             | 892471                 |                               | 56.094                   | 1539019                             | 863298                 |                               |
| 60  | 59.736                  |                 | 58.496                   | 1509257                             | 882859                 |                               | 57.283                   | 1551289                             | 888618                 |                               | 56.094                   | 1549572                             | 869217                 |                               |
| 61  | 59.736                  |                 | 58.496                   | 1507776                             | 881993                 |                               | 57.283                   | 1500225                             | 859367                 |                               | 56.094                   | 1542165                             | 865062                 |                               |
| 62  | 59.736                  |                 | 58.496                   | 1469467                             | 859583                 |                               | 57.283                   | 1497943                             | 858060                 |                               | 56.094                   | 1490621                             | 836199                 |                               |
| 63  | 59.736                  |                 | 58.496                   | 1428612                             | 835685                 |                               | 57.283                   | 1458963                             | 835731                 |                               | 56.094                   | 1487453                             | 834372                 |                               |
| 64  | 59.736                  |                 | 58.496                   | 1384020                             | 809600                 |                               | 57.283                   | 1417465                             | 819601                 |                               | 56.094                   | 1447782                             | 812119                 |                               |
| 65  | 147.246                 | 20639658        | 140.189                  | 1344027                             | 1884181                | 140.189                       | 133.471                  | 1372210                             | 1831501                | 133.471                       | 127.075                  | 1405568                             | 1786119                | 127.075                       |
| 66  | 147.246                 |                 | 140.189                  | 1307657                             | 1833194                |                               | 133.471                  | 1331467                             | 1777121                |                               | 127.075                  | 1395984                             | 1727685                |                               |
| 67  | 147.246                 |                 | 140.189                  | 1291598                             | 1810681                |                               | 133.471                  | 1294222                             | 1727410                |                               | 127.075                  | 1318007                             | 1674851                |                               |
| 68  | 147.246                 |                 | 140.189                  | 1292613                             | 1812104                |                               | 133.471                  | 1277026                             | 1704458                |                               | 127.075                  | 1291194                             | 1626292                |                               |
| 69  | 147.246                 |                 | 140.189                  | 1382868                             | 1938632                |                               | 133.471                  | 1276471                             | 1703717                |                               | 127.075                  | 1261379                             | 1602891                |                               |
| 70  | 147.246                 |                 | 140.189                  | 1387587                             | 1944990                |                               | 133.471                  | 1363827                             | 1820312                |                               | 127.075                  | 1259177                             | 1600093                |                               |
| 71  | 147.246                 |                 | 140.189                  | 1382267                             | 1937032                |                               | 133.471                  | 1372764                             | 1798357                |                               | 127.075                  | 1343441                             | 1707171                |                               |
| 72  | 147.246                 |                 | 140.189                  | 1363496                             | 1923357                |                               | 133.471                  | 1366021                             | 1793357                |                               | 127.075                  | 1356905                             | 1715982                |                               |
| 73  | 147.246                 |                 | 140.189                  | 132982                              | 1420091                |                               | 133.471                  | 1354967                             | 1774603                |                               | 127.075                  | 1348632                             | 1705469                |                               |
| 74  | 147.246                 |                 | 140.189                  | 1274564                             | 1726044                |                               | 133.471                  | 1322594                             | 1724824                |                               | 127.075                  | 1336077                             | 169515                 |                               |
| 75  | 147.246                 |                 | 140.189                  | 1296574                             | 1716711                |                               | 133.471                  | 1355200                             | 1744443                |                               | 127.075                  | 1327097                             | 1733635                |                               |
| 76  | 147.246                 |                 | 140.189                  | 1274848                             | 1748402                |                               | 133.471                  | 1377087                             | 1737185                |                               | 127.075                  | 1334495                             | 1706430                |                               |
| 77  | 147.246                 |                 | 140.189                  | 1206707                             | 1690727                |                               | 133.471                  | 1372604                             | 1711140                |                               | 127.075                  | 1356255                             | 171007                 |                               |
| 78  | 147.246                 |                 | 140.189                  | 1294044                             | 1752451                |                               | 133.471                  | 1385495                             | 174936                 |                               | 127.075                  | 1350976                             | 171715                 |                               |
| 79  | 147.246                 |                 | 140.189                  | 1265026                             | 176219                 |                               | 133.471                  | 1366756                             | 176578                 |                               | 127.075                  | 1362851                             | 1742315                |                               |
| 80  | 147.246                 |                 | 140.189                  | 1295777                             | 183215                 |                               | 133.471                  | 1360790                             | 1803215                |                               | 127.075                  | 1362555                             | 1803816                |                               |
| 81  | 147.246                 |                 | 140.189                  | 1292977                             | 1803252                |                               | 133.471                  | 1371026                             | 1762154                |                               | 127.075                  | 1377004                             | 1733225                |                               |
| 82  | 147.246                 |                 | 140.189                  | 1252332                             | 1718234                |                               | 133.471                  | 1346330                             | 1729192                |                               | 127.075                  | 1344674                             | 1692142                |                               |
| 83  | 147.246                 |                 | 140.189                  | 1296976                             | 1696707                |                               | 133.471                  | 1385519                             | 1648027                |                               | 127.075                  | 1379986                             | 1682228                |                               |
| 84  | 147.246                 |                 | 140.189                  | 1295655                             | 1666817                |                               | 133.471                  | 1367692                             | 1624233                |                               | 127.075                  | 1357134                             | 1580901                |                               |
| 85  | 147.246                 |                 | 140.189                  | 1252173                             | 1633898                |                               | 133.471                  | 1344106                             | 1592752                |                               | 127.075                  | 1336998                             | 1555186                |                               |
| 86  | 147.246                 |                 | 140.189                  | 1248834                             | 1601179                |                               | 133.471                  | 1348526                             | 1588610                |                               | 127.075                  | 1311616                             | 1522678                |                               |
| 87  | 147.246                 |                 | 140.189                  | 1383933                             | 1538233                |                               | 133.471                  | 1393130                             | 1524714                |                               | 127.075                  | 1383961                             | 1487917                |                               |
| 88  | 147.246                 |                 | 140.189                  | 1356801                             | 1500196                |                               | 133.471                  | 1348261                             | 1464827                |                               | 127.075                  | 1356875                             | 1453497                |                               |
| 89  | 147.246                 |                 | 140.189                  | 1320644                             | 1449508                |                               | 133.471                  | 1318862                             | 1426923                |                               | 127.075                  | 132475                              | 1397076                |                               |
| 90  | 147.246                 |                 | 140.189                  | 1278562                             | 1390514                |                               | 133.471                  | 1283710                             | 1378670                |                               | 127.075                  | 1283306                             | 1360010                |                               |
| 91  | 147.246                 |                 | 140.189                  | 1246568                             | 1345662                |                               | 133.471                  | 1242960                             | 1324281                |                               | 127.075                  | 1247721                             | 1314790                |                               |
| 92  | 147.246                 |                 | 140.189                  | 1209022                             | 1293026                |                               | 133.471                  | 121695                              | 1282551                |                               | 127.075                  | 1208839                             | 1265381                |                               |
| 93  | 147.246                 |                 | 140.189                  | 119864                              | 1238131                |                               | 133.471                  | 1176399                             | 1235441                |                               | 127.075                  | 118878                              | 1227308                |                               |
| 94  | 147.246                 |                 | 140.189                  | 118657                              | 1194382                |                               | 133.471                  | 110691                              | 117782                 |                               | 127.075                  | 116313                              | 115927                 |                               |
| 95  | 147.246                 |                 | 140.189                  | 109277                              | 1153195                |                               | 133.471                  | 112531                              | 110196                 |                               | 127.075                  | 114362                              | 115325                 |                               |
| 96  | 147.246                 |                 | 140.189                  | 10177                               | 112399                 |                               | 133.471                  | 106769                              | 115811                 |                               | 127.075                  | 109499                              | 110730                 |                               |
| 97  | 147.246                 |                 | 140.189                  | 56739                               | 79542                  |                               | 133.471                  | 62172                               | 82982                  |                               | 127.075                  | 67414                               | 85666                  |                               |
| 98  | 147.246                 |                 | 140.189                  | 42046                               | 58944                  |                               | 133.471                  | 42907                               | 57268                  |                               | 127.075                  | 47105                               | 59858                  |                               |
| 99  | 147.246                 |                 | 140.189                  | 27405                               | 38419                  |                               | 133.471                  | 30959                               | 41321                  |                               | 127.075                  | 31659                               | 40231                  |                               |
| 100 | 147.246                 |                 | 140.189                  | 49314                               | 69133                  |                               | 133.471                  | 50716                               | 67691                  |                               | 127.075                  | 52719                               | 66992                  |                               |

### Appendix 3. Cancer survival for 13 types of cancers

We estimated the 5-year relative survival for the defined 32 demographic subgroups. We obtained five-year relative survival rates using the period analysis method from the United States Cancer Statistics which incorporates data from the Surveillance, Epidemiology, and End Results (SEER) database.<sup>14</sup> The five-year survival for 2014, which was the most recently available data at the time of analysis, was used. These rates were extracted for each cancer type and by the defined 32 demographic subgroups for each cancer type. The rates are on a scale of 0-1.

Relative survival is a net survival measure representing cancer survival in the absence of other causes of death. Relative survival is defined as the ratio of the proportion of observed survivors in a cohort of cancer patients to the proportion of expected survivors in a comparable set of cancer-free individuals.<sup>18</sup> Relative survival is the preferred method to estimate survival from cancer registry data.

The period analysis is a method that enhances up-to-date monitoring of survival.<sup>19, 20</sup> In contrast to traditional cohort analysis of survival, period analysis derives long-term survival estimates exclusively from the survival experience of patients within some recent calendar period.<sup>19, 20</sup> Three-year intervals were chosen which results in the years 2008-2014 is used to calculate 5-year survival. Using seven years of data to calculate 5-year survival is the standard method used by SEER and used in SEER publications.<sup>21</sup>

The first interval contributed to the one-year survival and used cases diagnosed in 2012-2014, the second interval contributed to the two-year survival and used cases diagnosed in 2011-2013, the third interval contributed to the three-year survival and used cases diagnosed in 2010-2012, the fourth interval contributed to the four-year survival and used cases diagnosed in 2009-2011 and the fifth interval contributed to the five-year survival and used cases diagnosed in 2008-2010.

1  
2  
3 This analysis, therefore, used 2008-2014 diagnoses to calculate for 5-year relative survival for  
4  
5 2014. The highlighted orange boxes represent survival contributions for each year of diagnosis and year  
6  
7 of follow-up (**Appendix Table 3**). The annual probability of death was calculated as  $1 - \exp[\ln(5\text{-year}$   
8  
9 relative survival)/5].  
10  
11  
12  
13  
14  
15  
16  
17  
18  
19  
20  
21  
22  
23  
24  
25  
26  
27  
28  
29  
30  
31  
32  
33  
34  
35  
36  
37  
38  
39  
40  
41  
42  
43  
44  
45  
46  
47  
48  
49  
50  
51  
52  
53  
54  
55  
56  
57  
58  
59  
60

For peer review only

1  
2  
3  
4  
5  
6  
7  
8  
9  
10  
11  
12  
13  
14  
15  
16  
17  
18  
19  
20  
21  
22  
23  
24  
25  
26  
27  
28  
29  
30  
31  
32  
33  
34  
35  
36  
37  
38  
39  
40  
41  
42  
43  
44  
45  
46  
47  
48  
49  
50  
51  
52  
53  
54  
55  
56  
57  
58  
59  
60

**Appendix Table 3.** Period method for 5-year relative survival for 2014

| YEARS OF DIAGNOSIS |      |      |      |      |      |      |      |      |      |      |      |      |      |      |      |
|--------------------|------|------|------|------|------|------|------|------|------|------|------|------|------|------|------|
|                    | 2000 | 2001 | 2002 | 2003 | 2004 | 2005 | 2006 | 2007 | 2008 | 2009 | 2010 | 2011 | 2012 | 2013 | 2014 |
| 1                  |      |      |      |      |      |      |      |      |      |      |      |      |      |      |      |
| 2                  |      |      |      |      |      |      |      |      |      |      |      |      |      |      |      |
| 3                  |      |      |      |      |      |      |      |      |      |      |      |      |      |      |      |
| 4                  |      |      |      |      |      |      |      |      |      |      |      |      |      |      |      |
| 5                  |      |      |      |      |      |      |      |      |      |      |      |      |      |      |      |

For peer review only

#### Appendix 4. Methods of estimating the health-related quality of life among 13 types of cancers

Health utility values range from 0 (dead) to 1 (perfect health) and were assigned for each cancer type and by phase of care (initial, continuous, end of life), if available. We first searched databases for systematic reviews pertaining to utility weights or HRQOL measures for each cancer type of interest separately. We started with PubMed and searched Google Scholar if needed. The following search string was used for each cancer type : ("health related quality of life" OR "HRQOL" OR "quality of life" OR "QOL" OR "preference weight\*" OR "utility weight\*" OR "health state utilit\*" OR "health utility\*") AND ("cancer of interest") AND ("cancer" OR "neoplasm\*") AND ("review" OR "systematic review").

When an appropriate systematic review was identified, we read the articles included in the review and determined if the paper met the following data needs. Data Extraction Hierarchy: 1) cancer type specific to the type of interest; 2) consistent in the instrument used, prefer EQ-5D whenever available; 3) US samples preferred; 4) phase of care (assume same utility weights by phase if the phase of care data were not available). If no systematic reviews were available, we searched for individual studies about the utility weights of the cancer of interest. Additionally, check how often the paper is cited to see if it is a frequently used utility weight.



## Appendix 5. Methods of estimating policy implementation costs

We estimated the costs of implementing the federal menu calorie labeling for both government and industry, including government administration costs, monitoring and evaluation costs, industry compliance costs and reformulation costs, based on the FDA's budget report,<sup>22</sup> the Nutrition Review Project report,<sup>23</sup> and FDA's RIA<sup>24</sup> (**Appendix Table 4**).

It was estimated by FDA that approximately 298,600 establishments, organized under 2,130 chains were covered by the menu calorie labeling policy. Among the covered establishments, 115,000 (38.5%) were full-service restaurants and drinking places organized under 530 (24.9%) chains, and 116,200 (38.9%) were limited-service restaurants organized under 540 (25.4%) chains. In total, about 231,200 (77.4%) restaurants organized under 1,070 (50.2%) chains were covered by this policy.<sup>24</sup>

For industry compliance (#3) and reformulation costs (#4), the FDA estimated the costs by the type of establishments. Therefore, we only included the relevant costs incurred by restaurants as this approach generated more conservative estimates. In addition, the industry compliance costs consist of initial costs and recurring costs associated with new chains. In FDA's RIA, the initial costs were presented as a one-time cost, while the recurring costs associated with new chains were presented as annual costs and assumed to be incurred for 20 years starting from the 2nd year of policy implementation. According to FDA, 20 years is more appropriate for interventions that play out over long periods and whose effects deal with chronic conditions. Similarly, the reformulation costs (#4) estimated by FDA were presented as annual costs in FDA's RIA using the same assumption. We followed the same assumption and presented the annual compliance costs (#3) and annual reformulation costs (#4) incurred by restaurants in **Appendix Table 4**.

1  
2  
3 The cost of implementing the menu calorie labeling is fixed by the government. Uncertainty for  
4 the costs associated with government administration (#1) and government monitoring and evaluation (#  
5 2) was not provided in the source materials.<sup>22, 23</sup> We assumed that uncertainty is 20% around these costs.  
6  
7

8  
9  
10 For annual costs, namely the government monitoring and evaluation costs (#2) and the recurring  
11 costs in industry compliance (part of #3), and the reformulation costs (#4), we applied a 3% discounting  
12 rate recommended by the Second Panel on cost-effectiveness in health and medicine<sup>4</sup> to reflect the  
13 present value of future costs of government monitoring and evaluation, industry compliance and  
14 industry reformulation. The model is a closed cohort model, so we computed the discounted present  
15 value of per-person costs and total national costs for persons alive at implementation who remained  
16 alive in each subsequent year (not for the larger total US population in each year, which also has growth  
17 from immigration and new persons reaching the threshold age). The year-specific discounting factor is  
18 estimated by  $1/(1+3\%)^{(t-1)}$  (t is the number of years of policy intervention, t=1, 2, 3, ..., lifetime). As  
19 our model estimated the costs and health outcomes based on a closed cohort and the population size  
20 decline over time, we need to express the annual costs in proportion to the population at risk. The  
21 population at risk was estimated based on the proportion of death ( $P_{dt}$ , t=1, 2, 3, ...) in each year. We  
22 first obtained the proportion of people who are alive each year by calculating  $1-P_{dt}$  (t=1, 2, 3, ...). Then  
23 we multiplied the baseline population size of 235 million by the proportion of people who are alive each  
24 year (**Appendix Table 5**).  
25  
26  
27  
28  
29  
30  
31  
32  
33  
34  
35  
36  
37  
38  
39  
40  
41  
42  
43

44 We then estimated the per-person annual cost for cost categories #2, #3 (annual part), and #4, by  
45 dividing the annual cost estimated in the second year of implementing the policy among all US  
46 populations by the population size in the second year. Specifically, for government monitoring and  
47 evaluation, the per person annual cost is estimated  $\$503,648/233,719,989=\$0.00215$ , the per person  
48 annual cost for industry compliance recurring component is  $\$/233,719,989=\$$ , and that for reformulation  
49  
50  
51  
52  
53  
54  
55  
56  
57  
58  
59  
60

1  
2  
3 is \$662,800,000 /233,719,989=\$2.83587. Taken together, to estimate the discounted annual cost of #2,  
4  
5 #3 (annual part), and #4, we multiplied the population at risk, the per person annual cost estimated at  
6  
7 year-2, and the year-specific discounting factor, using: discounted annual cost = population at risk x per-  
8  
9 person annual cost x  $1/(1+3\%)^{(t-1)}$ .  
10  
11  
12  
13  
14  
15  
16  
17  
18  
19  
20  
21  
22  
23  
24  
25  
26  
27  
28  
29  
30  
31  
32  
33  
34  
35  
36  
37  
38  
39  
40  
41  
42  
43  
44  
45  
46  
47  
48  
49  
50  
51  
52  
53  
54  
55  
56  
57  
58  
59  
60

For peer review only

**Appendix Table 4.** Implementation cost estimates for the federal menu calorie labeling policy (in 2015 US dollars)

| Policy Effect                  | Cost Category                                        | One-time Cost*                                       | Annual Cost*                                                                                                               | Source                                                 | Major Elements                                                                                                                                                                                                                                                                                                                                                                                                                                                                                                                                                                         |
|--------------------------------|------------------------------------------------------|------------------------------------------------------|----------------------------------------------------------------------------------------------------------------------------|--------------------------------------------------------|----------------------------------------------------------------------------------------------------------------------------------------------------------------------------------------------------------------------------------------------------------------------------------------------------------------------------------------------------------------------------------------------------------------------------------------------------------------------------------------------------------------------------------------------------------------------------------------|
| Consumer behavior              | 1. Government administration <sup>#</sup>            | \$9,073,620<br>(\$7,258,896 to<br>\$10,888,344)      | N/A                                                                                                                        | FDA FY 2012<br>Budget<br>Report <sup>22</sup>          | 1) Costs for outreach, education, review of regulatory issues, developing training for inspectors, etc.                                                                                                                                                                                                                                                                                                                                                                                                                                                                                |
|                                | 2. Government monitoring and evaluation <sup>#</sup> | N/A                                                  | \$503,648<br>(\$402,918 to<br>\$604,378)<br>(starting from<br>2 <sup>nd</sup> year and<br>last for a<br>lifetime)          | Nutrition<br>Review<br>Project<br>report <sup>23</sup> | 1) Monitor industry compliance<br>2) Evaluate the accuracy, usefulness, and health impact of the policy intervention                                                                                                                                                                                                                                                                                                                                                                                                                                                                   |
|                                | 3. Industry compliance                               | \$276,632,470<br>(\$225,552,530 to<br>\$327,205,740) | \$27,648,591<br>(\$16,756,003 to<br>\$38,649,212)<br>(starting from<br>2 <sup>nd</sup> year and<br>last for a<br>lifetime) | FDA's RIA <sup>24</sup><br>Table 4-8                   | 1) Collecting and managing records of nutritional analysis for each standard menu item (initial cost + recurring cost associated with new chains)<br>2) Revising or replacing existing menus, menu boards, and providing full written nutrition information (initial cost + recurring cost associated with new chains)<br>3) Training employees to understand the nutrition information to help ensure compliance with the final requirements (initial cost + recurring cost associated with new chains)<br>4) Legal review (initial cost + recurring cost associated with new chains) |
| Industry response <sup>^</sup> | 4. Industry reformulation                            | N/A                                                  | \$15,059,100<br>(\$5,791,900 to<br>\$24,124,700)<br>(starting from<br>2 <sup>nd</sup> year and<br>last for a<br>lifetime)  | FDA's RIA <sup>24</sup><br>Table 4-8                   | 1) Annually recurring costs of nutrition analysis refer to the nutrition cost that will be incurred by the covered establishments due to the introduction of a new standard or reformulated standard menu items in their menus and the cost that will be incurred by new chains entering the industry<br>2) Annually recurring changes to menus or menu boards will be tied to new or reformulated standard menu items. In general, these future changes to menus will be incorporated into the natural menu                                                                           |

1  
2  
3  
4  
5  
6  
7  
8  
9  
10  
11  
12  
13  
14  
15  
16  
17  
18  
19  
20  
21  
22  
23  
24  
25  
26  
27  
28  
29  
30  
31  
32  
33  
34  
35  
36  
37  
38  
39  
40  
41  
42  
43  
44  
45  
46  
47

|  |  |  |  |  |                                                                                                                                                                                                                                                                                                                                                                          |
|--|--|--|--|--|--------------------------------------------------------------------------------------------------------------------------------------------------------------------------------------------------------------------------------------------------------------------------------------------------------------------------------------------------------------------------|
|  |  |  |  |  | <p>replacement cycle, so there will be no additional recurring menu update costs. However, all chain retail food establishments will need to provide additional written nutrition information for the reformulated or newly introduced menu items</p> <p>Average formula count, 6 new menu items, and 6 reformulated items per year<br/>FDA reformulation cost model</p> |
|--|--|--|--|--|--------------------------------------------------------------------------------------------------------------------------------------------------------------------------------------------------------------------------------------------------------------------------------------------------------------------------------------------------------------------------|

\*Policy intervention costs were inflated to 2015 US (December) dollars using the Consumer Price Index.  
 # Given no range of uncertainty was provided in source materials, we assumed 20% uncertainty around these costs.  
 ^Some chains or establishments may respond to increased consumer interest in caloric content standard menu items by reformulating existing menu items or by introducing new, lower-calorie items. The change in manufacturing costs associated with reformulating these items has not been included in the cost estimation, the FDA includes the cost associated with analyzing the nutrition information of new or reformulated items.

Peer review only

**Appendix Table 5.** The population size of people who are alive each year over a lifetime (in millions)

| Year | Population Size (Million) |
|------|---------------------------|
| 1    | 235.2                     |
| 2    | 233.7                     |
| 3    | 232.1                     |
| 4    | 230.4                     |
| 5    | 228.2                     |
| ⋮    | ⋮                         |
| 67   | 5.832                     |
| 68   | 4.348                     |
| 69   | 3.157                     |
| 70   | 2.233                     |

## Appendix 6. Annual health-related costs among cancer patients and the general population without cancer

The annual health-related costs data include: 1) medical expenditure, 2) productivity loss from missed workdays or disability, and 3) patient time cost associated with receiving care for cancer survivors by age (under 65 vs. above 65 years old) and phase of care (initial, continuing, end-year of life); 4) medical expenditure, 5) productivity loss, and 6) patient time cost for individuals without cancer by age and status of end year of life. The description of the data source and data structure were provided in **Appendix Table 6**.

We extracted the raw data for each of the costing components from the published literature.<sup>15, 25-29</sup> The overall assumptions for data extraction include: 1) health-related costs for breast cancer among postmenopausal females, advanced prostate cancer, esophageal adenocarcinoma, and stomach cardia cancer, by age, sex, and phase of cancer care, were the same as those for breast cancer, prostate cancer, esophagus cancer, and stomach cancer; 2) if no data available for a specific cancer type, we assumed the costs for that cancer type were the same as the estimates of costs for all-cancer sites, e.g., medical expenditure for all-cancer sites were used to replace the medical expenditures for multiple myeloma, gallbladder, liver, and thyroid cancers; 3) we extracted the costs for end-year of life due to cancer death and assumed that death due to other causes is not a competing outcome; 4) we assumed that the end-year life medical expenditure for individuals without cancer does not vary by the 32 subgroups.

If a specific costing component was not reported directly in the raw data, we calculated the cost for that component based on available data. For example, the annual productivity loss for colorectal cancer was reported as a percentage of total health-related costs.<sup>29</sup> We multiplied the percentage and the total health-related costs to obtain the productivity loss for colorectal cancer. We also performed data imputation for unavailable data. For instance, the annual productivity loss for all-cancer sites was

1  
2  
3 reported by time interval since cancer diagnosis (diagnosed within one year vs. diagnosed greater than  
4 one year).<sup>25</sup> To obtain this costing component by the defined phases of care, we calculated the weighted  
5 means which was used as the annual productivity loss for the continuous phase. We then assumed that  
6 the productivity loss in the initial phase and end-of-life phase of cancer care are 1.3 times and 4 times  
7 the mean estimates based on available data for other cancers.<sup>15, 25</sup> For individuals without cancer, we  
8 assumed that the end-of-life productivity loss is 4 times to the mean estimate of the productivity loss.  
9  
10 The same rules applied to data imputation for patient time costs.

11  
12 We then applied the age shifting to keep the expenditures consistent within each age group.  
13 Starting from 2021, individuals in the cohort of 55-64 years old have turned into the cohort of 65 years  
14 and older. Therefore, we assumed that starting from 2021, the health-related expenditures for individuals  
15 who were in the cohort of 55-64 years old would be the same as those for individuals who were in the  
16 cohort of 65 years and older at the beginning of the DiCOM model. Based on the same assumption,  
17 starting from 2031 and 2047, the health-related expenditures for the cohort of 45-54 years old and those  
18 for the cohort of 20-44 years old were projected to be the same as those for the cohort of 65 years and  
19 older, respectively. We followed the same rule and applied the age shifting for the health-related  
20 expenditures for individuals without cancer. All estimations and projections were performed in SAS 9.4.  
21 All health-related expenditures were inflated to 2015 US dollars using the Personal Health Care (PHC)  
22 index.



**Appendix Table 6.** Description of the data source of health-related expenditures

|                            | <b>A. Cancer Survivors</b>                                                                                                        |                                                                                                             | <b>B. Individuals without Cancer</b>                                                 |                                                                                                         |
|----------------------------|-----------------------------------------------------------------------------------------------------------------------------------|-------------------------------------------------------------------------------------------------------------|--------------------------------------------------------------------------------------|---------------------------------------------------------------------------------------------------------|
|                            | Data source<br>(Excess or Total)                                                                                                  | Category                                                                                                    | Data source                                                                          | Category                                                                                                |
| <b>Medical expenditure</b> | Mariotto et al. 2011, SEER-Medicare, in 2010 US dollars (Excess)                                                                  | -by phase of care <sup>1</sup><br>-by age (under 65 vs. above 65 years old)<br>-by sex                      | Kim et al. 2018, MEPS 2013-2014, <i>in vivo</i> analysis, in 2014 US dollars (Total) | -Medical expenditure among all US adults<br>-by 32 subgroups stratified by age, sex, and race/ethnicity |
|                            |                                                                                                                                   |                                                                                                             | Hogen et al. 2001, SEER-Medicare (65+), in 2001 US dollars (Total)                   | -Medical expenditure in the end year of life among all US adults                                        |
| <b>Productivity loss</b>   | Zheng et al. 2016, MEPS 2008-2012, data available for colorectal, female breast, and prostate cancers, in 2012 US dollars (Total) | -by age                                                                                                     |                                                                                      |                                                                                                         |
|                            | Guy et al. 2013, MEPS 2008-2010, all types of cancer, in 2010 US dollars (Total)                                                  | -by age<br>-by time interval since cancer diagnosis (less than 1 year vs. greater than 1 year) <sup>2</sup> | Guy et al. 2013, MEPS 2008-2010, in 2010 US dollars (Total)                          | -by age                                                                                                 |
| <b>Patient time cost</b>   | Yabroff et al. 2014, MEPS 2008-2011, all types of cancer, in 2011 US dollars (Total)                                              | -by age                                                                                                     | Yabroff et al. 2014, MEPS 2008-2011, in 2011 US dollars (Total)                      | -by age                                                                                                 |

1. The definition of phases of care: 1) initial phase, defined as the first 12 months following diagnosis, 2) end-year of life phase, defined as the final 12 months of life, and 3) the continuing phase, defined as all the months between the initial phase and the end-year of life. The costs of end-year of life varied by cause of death, either cancer-specific death or death due to other causes.

2. Weighted means were calculated based on sample sizes and strata means.

## Reference

1. Shangquan S, Afshin A, Shulkin M, et al. A Meta-Analysis of Food Labeling Effects on Consumer Diet Behaviors and Industry Practices. *American journal of preventive medicine*. Feb 2019;56(2):300-314. doi:10.1016/j.amepre.2018.09.024
2. Food and Drug Administration. Food Labeling; Nutrition Labeling of Standard Menu Items in Restaurants and Similar Retail Food Establishments; Calorie Labeling of Articles of Food in Vending Machines; Final Rule In: Department of Health and Human Services, editor. 2014.
3. Long MW, Tobias DK, Craddock AL, Batchelder H, Gortmaker SL. Systematic review and meta-analysis of the impact of restaurant menu calorie labeling. *Am J Public Health*. 2015;105(5):e11-e24. doi:10.2105/AJPH.2015.302570
4. Petimar J, Zhang F, Cleveland LP, et al. Estimating the effect of calorie menu labeling on calories purchased in a large restaurant franchise in the southern United States: quasi-experimental study. *BMJ (Clinical research ed)*. 2019;367:l5837-l5837. doi:10.1136/bmj.l5837
5. Kaur A, researcher, Briggs ADM, academic v. Calorie labelling to reduce obesity. *BMJ (Clinical research ed)*. 2019;367:l6119-l6119. doi:10.1136/bmj.l6119
6. Auchincloss AH, Mallya GG, Leonberg BL, Ricchezza A, Glanz K, Schwarz DF. Customer responses to mandatory menu labeling at full-service restaurants. *American journal of preventive medicine*. 2013;45(6):710-719. doi:10.1016/j.amepre.2013.07.014
7. Littlewood JA, Lourenço S, Iversen CL, Hansen GL. Menu labelling is effective in reducing energy ordered and consumed: a systematic review and meta-analysis of recent studies. *Public Health Nutr*. 2016;19(12):2106-2121. doi:10.1017/S1368980015003468
8. Cantu-Jungles TM, McCormack LA, Slaven JE, Slobodnik M, Eicher-Miller HA. A Meta-Analysis to Determine the Impact of Restaurant Menu Labeling on Calories and Nutrients (Ordered or Consumed) in U.S. Adults. *Nutrients*. 2017;9(10):1088. doi:10.3390/nu9101088
9. Bleich SN, Wolfson JA, Jarlenski MP. Calorie changes in chain restaurant menu items: implications for obesity and evaluations of menu labeling. *American journal of preventive medicine*. Jan 2015;48(1):70-5. doi:10.1016/j.amepre.2014.08.026
10. Bleich SN, Wolfson JA, Jarlenski MP. Calorie Changes in Large Chain Restaurants: Declines in New Menu Items but Room for Improvement. *American journal of preventive medicine*. 2016;50(1):e1-e8. doi:10.1016/j.amepre.2015.05.007
11. Bleich SN, Wolfson JA, Jarlenski MP. Calorie changes in large chain restaurants from 2008 to 2015. *Preventive medicine*. Jul 2017;100:112-116. doi:10.1016/j.ypmed.2017.04.004
12. Bleich SN, Moran AJ, Jarlenski MP, Wolfson JA. Higher-Calorie Menu Items Eliminated in Large Chain Restaurants. *American journal of preventive medicine*. Feb 2018;54(2):214-220. doi:10.1016/j.amepre.2017.11.004
13. Bleich SN, Wolfson JA, Jarlenski MP, Block JP. Restaurants With Calories Displayed On Menus Had Lower Calorie Counts Compared To Restaurants Without Such Labels. *Health affairs (Project Hope)*. 2015;34(11):1877-1884. doi:10.1377/hlthaff.2015.0512
14. Centers for Disease Control and Prevention. NPCR and SEER Incidence – U.S. Cancer Statistics Public Use Databases. United States Department of Health and Human Services, Centers for Disease Control and Prevention and National Cancer Institute. Accessed September 4, 2019. [www.cdc.gov/cancer/uscs/public-use](http://www.cdc.gov/cancer/uscs/public-use)
15. Mariotto AB, Yabroff KR, Shao Y, Feuer EJ, Brown ML. Projections of the cost of cancer care in the United States: 2010-2020. *Journal of the National Cancer Institute*. Jan 19 2011;103(2):117-28. doi:10.1093/jnci/djq495
16. Clegg LX, Hankey BF, Tiwari R, Feuer EJ, Edwards BK. Estimating average annual per cent change in trend analysis. *Statistics in medicine*. Dec 20 2009;28(29):3670-82. doi:10.1002/sim.3733
17. United States Census Bureau. Projections for the United States: 2017 to 2060. Accessed July 3, 2019. <https://www.census.gov/data/tables/2017/demo/popproj/2017-summary-tables.html>

- 1  
2  
3 18. National Cancer Institute. Surveillance research Program. Measures of Cancer Survival.  
4 <https://surveillance.cancer.gov/survival/measures.html>
- 5 19. Brenner H, Hakulinen T. Up-to-date and precise estimates of cancer patient survival: model-based  
6 period analysis. *American journal of epidemiology*. Oct 1 2006;164(7):689-96. doi:10.1093/aje/kwj243
- 7 20. Brenner H, Hakulinen T. Up-to-date cancer survival: period analysis and beyond. *International journal of*  
8 *cancer*. Mar 15 2009;124(6):1384-90. doi:10.1002/ijc.24021
- 9 21. National Cancer Institute. Surveillance Research Program. Cancer Survival Statistics: Cohort Definition  
10 Using Diagnosis Year. <https://surveillance.cancer.gov/survival/cohort.html>
- 11 22. Food and Drug Administration. *Justification of Estimates for Appropriations Committees Fiscal Year*  
12 *2012*. 2012.  
13 <https://www.fda.gov/downloads/AboutFDA/ReportsManualsForms/Reports/BudgetReports/UCM243370.pdf>
- 14 23. Food and Drug Administration. *The Nutrition Review Project. Report to the Director, Center for Food*  
15 *Safety and Applied Nutrition*. 2014. [http://www.fdalawblog.net/wp-](http://www.fdalawblog.net/wp-content/uploads/archives/docs/Nutrition%20Review%20Project.pdf)  
16 [content/uploads/archives/docs/Nutrition%20Review%20Project.pdf](http://www.fdalawblog.net/wp-content/uploads/archives/docs/Nutrition%20Review%20Project.pdf)
- 17 24. S. FaDAaHH. Food labeling; nutrition labeling of standard menu items in restaurants and similar retail  
18 food establishments. Final rule. *Fed Regist*. 2014;79(230):71155-71259.
- 19 25. Guy GP, Jr., Ekwueme DU, Yabroff KR, et al. Economic burden of cancer survivorship among adults in the  
20 United States. *Journal of clinical oncology : official journal of the American Society of Clinical Oncology*. Oct 20  
21 2013;31(30):3749-57. doi:10.1200/jco.2013.49.1241
- 22 26. Hogan C, Lunney J, Gabel J, Lynn J. Medicare beneficiaries' costs of care in the last year of life. *Health*  
23 *affairs (Project Hope)*. Jul-Aug 2001;20(4):188-95. doi:10.1377/hlthaff.20.4.188
- 24 27. Yabroff KR, Davis WW, Lamont EB, et al. Patient time costs associated with cancer care. *Journal of the*  
25 *National Cancer Institute*. Jan 3 2007;99(1):14-23. doi:10.1093/jnci/djk001
- 26 28. Yabroff KR, Guy GP, Jr., Ekwueme DU, et al. Annual patient time costs associated with medical care  
27 among cancer survivors in the United States. *Medical care*. Jul 2014;52(7):594-601.  
28 doi:10.1097/mlr.0000000000000151
- 29 29. Zheng Z, Yabroff KR, Guy GP, Jr., et al. Annual Medical Expenditure and Productivity Loss Among  
30 Colorectal, Female Breast, and Prostate Cancer Survivors in the United States. *Journal of the National Cancer*  
31 *Institute*. May 2016;108(5)doi:10.1093/jnci/djv382
- 32  
33  
34  
35  
36  
37  
38  
39  
40  
41  
42  
43  
44  
45  
46  
47  
48  
49  
50  
51  
52  
53  
54  
55  
56  
57  
58  
59  
60

**CHEERS Checklist**

**Items to include when reporting economic evaluations of health interventions**

The **ISPOR CHEERS Task Force Report**, *Consolidated Health Economic Evaluation Reporting Standards (CHEERS)—Explanation and Elaboration: A Report of the ISPOR Health Economic Evaluations Publication Guidelines Good Reporting Practices Task Force*, provides examples and further discussion of the 24-item CHEERS Checklist and the CHEERS Statement. It may be accessed via the *Value in Health* or via the ISPOR Health Economic Evaluation Publication Guidelines – CHEERS: Good Reporting Practices webpage: <http://www.ispor.org/TaskForces/EconomicPubGuidelines.asp>

| Section/item                    | Item No | Recommendation                                                                                                                                                                             | Reported on page No/line No  |
|---------------------------------|---------|--------------------------------------------------------------------------------------------------------------------------------------------------------------------------------------------|------------------------------|
| <b>Title and abstract</b>       |         |                                                                                                                                                                                            |                              |
| Title                           | 1       | Identify the study as an economic evaluation or use more specific terms such as “cost-effectiveness analysis”, and describe the interventions compared.                                    | Page 1/Lines 1-2             |
| Abstract                        | 2       | Provide a structured summary of objectives, perspective, setting, methods (including study design and inputs), results (including base case and uncertainty analyses), and conclusions.    | Pages 3-4/<br>Lines 32-59    |
| <b>Introduction</b>             |         |                                                                                                                                                                                            |                              |
| Background and objectives       | 3       | Provide an explicit statement of the broader context for the study.<br>Present the study question and its relevance for health policy or practice decisions.                               | Pages 5-6/<br>Lines 64-92    |
| <b>Methods</b>                  |         |                                                                                                                                                                                            |                              |
| Target population and subgroups | 4       | Describe characteristics of the base case population and subgroups analysed, including why they were chosen.                                                                               | Page 9/<br>Lines 106-113     |
| Setting and location            | 5       | State relevant aspects of the system(s) in which the decision(s) need(s) to be made.                                                                                                       | Page 6/Lines 96-98           |
| Study perspective               | 6       | Describe the perspective of the study and relate this to the costs being evaluated.                                                                                                        | Page 12/<br>Lines 189-197    |
| Comparators                     | 7       | Describe the interventions or strategies being compared and state why they were chosen.                                                                                                    | Pages 9-10/<br>Lines 125-140 |
| Time horizon                    | 8       | State the time horizon(s) over which costs and consequences are being evaluated and say why appropriate.                                                                                   | Page 6/<br>Lines 98-99       |
| Discount rate                   | 9       | Report the choice of discount rate(s) used for costs and outcomes and say why appropriate.                                                                                                 | Page 12<br>/Line 198         |
| Choice of health outcomes       | 10      | Describe what outcomes were used as the measure(s) of benefit in the evaluation and their relevance for the type of analysis performed.                                                    | Page 11/<br>Lines 158-170    |
| Measurement of effectiveness    | 11a     | <i>Single study-based estimates:</i> Describe fully the design features of the single effectiveness study and why the single study was a sufficient source of clinical effectiveness data. |                              |

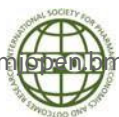

|    |                         |     |                                                                                                                                                         |                                                            |
|----|-------------------------|-----|---------------------------------------------------------------------------------------------------------------------------------------------------------|------------------------------------------------------------|
| 1  |                         | 11b | <i>Synthesis-based estimates</i> : Describe fully the methods used for identification of included studies and synthesis of clinical effectiveness data. | Pages 9-11/<br>Lines 115-170                               |
| 2  |                         |     |                                                                                                                                                         |                                                            |
| 3  |                         |     |                                                                                                                                                         |                                                            |
| 4  | Measurement and         | 12  | If applicable, describe the population and methods used to                                                                                              |                                                            |
| 5  | valuation of preference |     | elicit preferences for outcomes.                                                                                                                        |                                                            |
| 6  | based outcomes          |     |                                                                                                                                                         |                                                            |
| 7  | Estimating resources    | 13a | <i>Single study-based economic evaluation</i> : Describe approaches                                                                                     |                                                            |
| 8  | and costs               |     | used to estimate resource use associated with the alternative                                                                                           |                                                            |
| 9  |                         |     | interventions. Describe primary or secondary research methods                                                                                           |                                                            |
| 10 |                         |     | for valuing each resource item in terms of its unit cost.                                                                                               |                                                            |
| 11 |                         |     | Describe any adjustments made to approximate to opportunity                                                                                             |                                                            |
| 12 |                         |     | costs.                                                                                                                                                  |                                                            |
| 13 |                         | 13b | <i>Model-based economic evaluation</i> : Describe approaches and                                                                                        |                                                            |
| 14 |                         |     | data sources used to estimate resource use associated with                                                                                              |                                                            |
| 15 |                         |     | model health states. Describe primary or secondary research                                                                                             | Page 11/<br>Lines 168-170                                  |
| 16 |                         |     | methods for valuing each resource item in terms of its unit                                                                                             |                                                            |
| 17 |                         |     | cost. Describe any adjustments made to approximate to                                                                                                   |                                                            |
| 18 |                         |     | opportunity costs.                                                                                                                                      |                                                            |
| 19 | Currency, price date,   | 14  | Report the dates of the estimated resource quantities and unit                                                                                          |                                                            |
| 20 | and conversion          |     | costs. Describe methods for adjusting estimated unit costs to                                                                                           |                                                            |
| 21 |                         |     | the year of reported costs if necessary. Describe methods for                                                                                           | Page 12/Line 197-198                                       |
| 22 |                         |     | converting costs into a common currency base and the                                                                                                    |                                                            |
| 23 |                         |     | exchange rate.                                                                                                                                          |                                                            |
| 24 | Choice of model         | 15  | Describe and give reasons for the specific type of decision-                                                                                            |                                                            |
| 25 |                         |     | analytical model used. Providing a figure to show model                                                                                                 | Supplementary Figure 1                                     |
| 26 |                         |     | structure is strongly recommended.                                                                                                                      | Pages 9-10/<br>Lines 118-120, 128-129,<br>135-140, 145-152 |
| 27 | Assumptions             | 16  | Describe all structural or other assumptions underpinning the                                                                                           |                                                            |
| 28 |                         |     | decision-analytical model.                                                                                                                              |                                                            |
| 29 | Analytical methods      | 17  | Describe all analytical methods supporting the evaluation. This                                                                                         |                                                            |
| 30 |                         |     | could include methods for dealing with skewed, missing, or                                                                                              |                                                            |
| 31 |                         |     | censored data; extrapolation methods; methods for pooling                                                                                               | Page 13/<br>Lines 210-214                                  |
| 32 |                         |     | data; approaches to validate or make adjustments (such as half                                                                                          |                                                            |
| 33 |                         |     | cycle corrections) to a model; and methods for handling                                                                                                 |                                                            |
| 34 |                         |     | population heterogeneity and uncertainty.                                                                                                               |                                                            |
| 35 |                         |     |                                                                                                                                                         |                                                            |
| 36 |                         |     |                                                                                                                                                         |                                                            |
| 37 |                         |     |                                                                                                                                                         |                                                            |
| 38 |                         |     |                                                                                                                                                         |                                                            |
| 39 |                         |     |                                                                                                                                                         |                                                            |
| 40 |                         |     |                                                                                                                                                         |                                                            |
| 41 | <b>Results</b>          |     |                                                                                                                                                         |                                                            |
| 42 | Study parameters        | 18  | Report the values, ranges, references, and, if used, probability                                                                                        |                                                            |
| 43 |                         |     | distributions for all parameters. Report reasons or sources for                                                                                         |                                                            |
| 44 |                         |     | distributions used to represent uncertainty where appropriate.                                                                                          |                                                            |
| 45 |                         |     | Providing a table to show the input values is strongly                                                                                                  | Pages 7-8/Table 1                                          |
| 46 |                         |     | recommended.                                                                                                                                            |                                                            |
| 47 | Incremental costs and   | 19  | For each intervention, report mean values for the main                                                                                                  |                                                            |
| 48 | outcomes                |     | categories of estimated costs and outcomes of interest, as well                                                                                         | Pages 16-17/<br>Table 2                                    |
| 49 |                         |     | as mean differences between the comparator groups. If                                                                                                   |                                                            |
| 50 |                         |     | applicable, report incremental cost-effectiveness ratios.                                                                                               |                                                            |
| 51 | Characterising          | 20a | <i>Single study-based economic evaluation</i> : Describe the effects                                                                                    |                                                            |
| 52 | uncertainty             |     | of sampling uncertainty for the estimated incremental cost and                                                                                          |                                                            |
| 53 |                         |     |                                                                                                                                                         |                                                            |
| 54 |                         |     |                                                                                                                                                         |                                                            |
| 55 |                         |     |                                                                                                                                                         |                                                            |
| 56 |                         |     |                                                                                                                                                         |                                                            |
| 57 |                         |     |                                                                                                                                                         |                                                            |
| 58 |                         |     |                                                                                                                                                         |                                                            |
| 59 |                         |     |                                                                                                                                                         |                                                            |
| 60 |                         |     |                                                                                                                                                         |                                                            |

|    |                       |                                                                      |                               |
|----|-----------------------|----------------------------------------------------------------------|-------------------------------|
| 1  |                       | incremental effectiveness parameters, together with the impact       |                               |
| 2  |                       | of methodological assumptions (such as discount rate, study          |                               |
| 3  |                       | perspective).                                                        |                               |
| 4  |                       |                                                                      |                               |
| 5  | 20b                   | <i>Model-based economic evaluation</i> : Describe the effects on the |                               |
| 6  |                       | results of uncertainty for all input parameters, and uncertainty     | Page 21/<br>Lines 282-295     |
| 7  | Characterising        | related to the structure of the model and assumptions.               |                               |
| 8  | heterogeneity         |                                                                      |                               |
| 9  | 21                    | If applicable, report differences in costs, outcomes, or cost-       |                               |
| 10 |                       | effectiveness that can be explained by variations between            |                               |
| 11 |                       | subgroups of patients with different baseline characteristics or     | Pages 18-19/<br>Lines 267-281 |
| 12 |                       | other observed variability in effects that are not reducible by      |                               |
| 13 | <b>Discussion</b>     | more information.                                                    |                               |
| 14 | Study findings,       |                                                                      |                               |
| 15 | limitations,          |                                                                      |                               |
| 16 | generalisability, and | 22 Summarise key study findings and describe how they support        |                               |
| 17 | current knowledge     | the conclusions reached. Discuss limitations and the                 |                               |
| 18 |                       | generalisability of the findings and how the findings fit with       | Pages 21-24                   |
| 19 | <b>Other</b>          | current knowledge.                                                   |                               |
| 20 | Source of funding     | 23 Describe how the study was funded and the role of the funder      |                               |
| 21 |                       | in the identification, design, conduct, and reporting of the         |                               |
| 22 |                       | analysis. Describe other non-monetary sources of support.            | Page 26                       |
| 23 | Conflicts of interest | 24 Describe any potential for conflict of interest of study          |                               |
| 24 |                       | contributors in accordance with journal policy. In the absence       |                               |
| 25 |                       | of a journal policy, we recommend authors comply with                | Pages 26-27                   |
| 26 |                       | International Committee of Medical Journal Editors                   |                               |
| 27 |                       | recommendations.                                                     |                               |
| 28 |                       |                                                                      |                               |
| 29 |                       |                                                                      |                               |

31 For consistency, the CHEERS Statement checklist format is based on the format of the CONSORT  
 32 statement checklist

35 The **ISPOR CHEERS Task Force Report** provides examples and further discussion of the 24-item  
 36 CHEERS Checklist and the CHEERS Statement. It may be accessed via the *Value in Health* link or via the  
 37 ISPOR Health Economic Evaluation Publication Guidelines – CHEERS: Good Reporting Practices  
 38 webpage: <http://www.ispor.org/TaskForces/EconomicPubGuidelines.asp>

41 The citation for the CHEERS Task Force Report is:  
 42 Husereau D, Drummond M, Petrou S, et al. Consolidated health economic evaluation reporting standards  
 43 (CHEERS)—Explanation and elaboration: A report of the ISPOR health economic evaluations publication  
 44 guidelines good reporting practices task force. *Value Health* 2013;16:231-50.

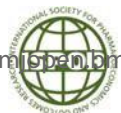

# BMJ Open

## Cost-Effectiveness Analysis of the Federal Menu Calorie Labeling and Obesity-Associated Cancer Burdens in the United States

|                                 |                                                                                                                                                                                                                                                                                                                                                                                                                                                                                                                                                                                                                                                                                                                                                                                                                                                                                                                                                                                                                                  |
|---------------------------------|----------------------------------------------------------------------------------------------------------------------------------------------------------------------------------------------------------------------------------------------------------------------------------------------------------------------------------------------------------------------------------------------------------------------------------------------------------------------------------------------------------------------------------------------------------------------------------------------------------------------------------------------------------------------------------------------------------------------------------------------------------------------------------------------------------------------------------------------------------------------------------------------------------------------------------------------------------------------------------------------------------------------------------|
| Journal:                        | <i>BMJ Open</i>                                                                                                                                                                                                                                                                                                                                                                                                                                                                                                                                                                                                                                                                                                                                                                                                                                                                                                                                                                                                                  |
| Manuscript ID                   | bmjopen-2022-063614.R1                                                                                                                                                                                                                                                                                                                                                                                                                                                                                                                                                                                                                                                                                                                                                                                                                                                                                                                                                                                                           |
| Article Type:                   | Original research                                                                                                                                                                                                                                                                                                                                                                                                                                                                                                                                                                                                                                                                                                                                                                                                                                                                                                                                                                                                                |
| Date Submitted by the Author:   | 11-Nov-2022                                                                                                                                                                                                                                                                                                                                                                                                                                                                                                                                                                                                                                                                                                                                                                                                                                                                                                                                                                                                                      |
| Complete List of Authors:       | Du, Mengxi; Tufts University Friedman School of Nutrition Science and Policy,<br>Griecci, Christina; Tufts University - Boston Campus, Friedman School of Nutrition and Policy<br>Cudhea, Frederick; Tufts University Friedman School of Nutrition Science and Policy<br>Eom, Heesun; New York Academy of Medicine, REAP<br>Wong, John; Tufts Medical Center, Institute of Clinical Research and Health Policy Studies<br>Wilde, Parke; Tufts University Friedman School of Nutrition Science and Policy<br>Kim, David; Tufts Medical Center, Center for the Evaluation of Value and Risk in Health, Institute for Clinical Research and Health Policy Studies<br>Michaud, Dominique; Tufts University School of Medicine,<br>Wang, Y. Claire; Columbia University Mailman School of Public Health, Department of Health Policy and Management<br>Mozaffarian, Dariush; Friedman School of Nutrition Science and Policy, Tufts University,<br>Zhang, Fang-Fang; Tufts University Friedman School of Nutrition Science and Policy |
| <b>Primary Subject Heading</b>: | Health economics                                                                                                                                                                                                                                                                                                                                                                                                                                                                                                                                                                                                                                                                                                                                                                                                                                                                                                                                                                                                                 |
| Secondary Subject Heading:      | Health policy, Public health, Nutrition and metabolism                                                                                                                                                                                                                                                                                                                                                                                                                                                                                                                                                                                                                                                                                                                                                                                                                                                                                                                                                                           |
| Keywords:                       | Health policy < HEALTH SERVICES ADMINISTRATION & MANAGEMENT, NUTRITION & DIETETICS, HEALTH ECONOMICS                                                                                                                                                                                                                                                                                                                                                                                                                                                                                                                                                                                                                                                                                                                                                                                                                                                                                                                             |
|                                 |                                                                                                                                                                                                                                                                                                                                                                                                                                                                                                                                                                                                                                                                                                                                                                                                                                                                                                                                                                                                                                  |

SCHOLARONE™  
Manuscripts

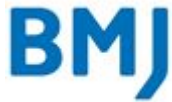

I, the Submitting Author has the right to grant and does grant on behalf of all authors of the Work (as defined in the below author licence), an exclusive licence and/or a non-exclusive licence for contributions from authors who are: i) UK Crown employees; ii) where BMJ has agreed a CC-BY licence shall apply, and/or iii) in accordance with the terms applicable for US Federal Government officers or employees acting as part of their official duties; on a worldwide, perpetual, irrevocable, royalty-free basis to BMJ Publishing Group Ltd ("BMJ") its licensees and where the relevant Journal is co-owned by BMJ to the co-owners of the Journal, to publish the Work in this journal and any other BMJ products and to exploit all rights, as set out in our [licence](#).

The Submitting Author accepts and understands that any supply made under these terms is made by BMJ to the Submitting Author unless you are acting as an employee on behalf of your employer or a postgraduate student of an affiliated institution which is paying any applicable article publishing charge ("APC") for Open Access articles. Where the Submitting Author wishes to make the Work available on an Open Access basis (and intends to pay the relevant APC), the terms of reuse of such Open Access shall be governed by a Creative Commons licence – details of these licences and which [Creative Commons](#) licence will apply to this Work are set out in our licence referred to above.

Other than as permitted in any relevant BMJ Author's Self Archiving Policies, I confirm this Work has not been accepted for publication elsewhere, is not being considered for publication elsewhere and does not duplicate material already published. I confirm all authors consent to publication of this Work and authorise the granting of this licence.



1  
2  
3 1 **Cost-Effectiveness Analysis of the Federal Menu Calorie Labeling and Obesity-Associated**  
4  
5 2 **Cancer Burdens in the United States**  
6

7  
8 3 Mengxi Du, doctoral candidate<sup>1</sup>, Christina F. Griecci, postdoctoral fellow<sup>1</sup>, Frederick Cudhea,  
9  
10 4 statistician<sup>1</sup>, Heesun Eom, research assistant<sup>1,2</sup>, John B. Wong, director of comparative  
11  
12 5 effectiveness research<sup>3</sup>, Parke Wilde, professor of food and nutrition policy<sup>1</sup>, David D. Kim,  
13  
14 6 assistant professor of medicine<sup>4</sup>, Dominique S. Michaud, professor of public health and  
15  
16 7 community medicine<sup>5</sup>, Y. Claire Wang, associate professor, vice president of research,  
17  
18 8 evaluation and policy<sup>2,6</sup>, Dariush Mozaffarian, dean and Jean Mayer professor of nutrition<sup>1</sup>,  
19  
20 9 Fang Fang Zhang, Neely Family professor of nutrition and cancer<sup>1</sup> *on behalf of the Food-PRICE*  
21  
22 10 *Project*  
23

- 24  
25  
26 11 1. Friedman School of Nutrition Science & Policy, Tufts University, Boston, MA  
27  
28 12 2. New York Academy of Medicine, New York, NY  
29  
30 13 3. Division of Clinical Decision Making, Tufts Medical Center, Boston, MA  
31  
32 14 4. Center for the Evaluation of Value and Risk in Health, Institute for Clinical Research and  
33  
34 15 Health Policy Studies, Tufts Medical Center, Boston, MA  
35  
36 16 5. Department of Public Health and Community Medicine, School of Medicine, Tufts University,  
37  
38 17 Boston, MA  
39  
40 18 6. Department of Health Policy and Management, Mailman School of Public Health, Columbia  
41  
42 19 University, New York, NY  
43  
44  
45

46 20 **Short Running Head:** Cost-Effectiveness of Menu Calorie Labeling to Prevent Cancer  
47  
48

49 21 **Word Count:** 3895  
50  
51  
52  
53  
54  
55  
56  
57  
58  
59  
60

1  
2  
3 22 **Corresponding Author:** Fang Fang Zhang, M.D., Ph.D., Friedman School of Nutrition Science  
4  
5 23 and Policy, Tufts University, 150 Harrison Avenue, Boston, MA 02111  
6  
7 24 ([fang\\_fang\\_zhang@tufts.edu](mailto:fang_fang_zhang@tufts.edu)). Phone: 617-636-3740; Fax: 617-636-3727  
8  
9  
10 25 **Abbreviations:** AMPM, Automated Multiple Pass Method; BMI, Body Mass Index; CDC,  
11  
12 26 Centers of Disease Control and Prevention; CI, Confidence Interval; DiCOM, Diet and Cancer  
13  
14 27 Outcome Model; FDA, Food and Drug Administration; FNDDS, Food and Nutrient Database for  
15  
16 28 Dietary Studies; MEC, Mobile Examination Center; NCHS, National Center for Health  
17  
18 29 Statistics; NHANES, National Health and Nutrition Examination Survey; PSA, Probabilistic  
19  
20 30 sensitivity analysis; SD, Standard Deviation; SE, Standard Error; USDA, United States  
21  
22 31 Department of Agriculture; UI, Uncertainty Interval  
23  
24  
25  
26  
27  
28  
29  
30  
31  
32  
33  
34  
35  
36  
37  
38  
39  
40  
41  
42  
43  
44  
45  
46  
47  
48  
49  
50  
51  
52  
53  
54  
55  
56  
57  
58  
59  
60

1  
2  
3 **32 ABSTRACT**  
4

5 **33 Objective** To assess the impact of menu calorie labeling on reducing obesity-associated cancer  
6  
7  
8 **34** burdens in the United States (US).  
9

10 **35 Design** Cost-effectiveness analysis using a Markov cohort state-transition model.  
11

12 **36 Setting** Policy intervention.  
13

14 **37 Participants** A modeled population of 235 million adults aged 20+ years in 2015-2016.  
15

16  
17 **38 Interventions** The impact of menu calorie labeling on reducing 13 obesity-associated cancers  
18  
19 **39** among US adults over a lifetime was evaluated in scenarios: (1) effects on consumer behaviors;  
20  
21 **40** and (2) additional effects on industry reformulation. The model integrated nationally  
22  
23 **41** representative demographics, calorie intake from restaurants, cancer statistics, and estimates on  
24  
25 **42** associations of policy with calorie intake, dietary change with BMI change, BMI with cancer  
26  
27 **43** rates, and policy and healthcare costs from published literature.  
28  
29

30  
31 **44 Main outcome measures** Averted new cancer cases and cancer deaths and net costs (in 2015 US  
32  
33 **45** dollars) among total population and demographic subgroups. Incremental cost-effectiveness  
34  
35 **46** ratios from societal and healthcare perspectives were assessed and compared to the threshold of  
36  
37 **47** \$150 000 per quality-adjusted life year (QALY) gained. Probabilistic sensitivity analyses  
38  
39 **48** incorporated uncertainty in input parameters and generated 95% uncertainty intervals (UIs).  
40  
41

42 **49 Results** Considering consumer behavior alone, this policy was associated with 28 000 (95% UI:  
43  
44 **50** 16 300-39 100) new cancer cases and 16 700 (9610-23 600) cancer deaths averted, 111 000 (64  
45  
46 **51** 800-158 000) QALY gained, and \$1480 (\$884-\$2080) million saved in cancer-related medical  
47  
48 **52** costs among US adults. The policy was associated with net cost savings of \$1460 (\$864-\$2060)  
49  
50 **53** million and \$1350 (\$486-\$2260) million from healthcare and societal perspectives, respectively.  
51  
52  
53 **54** Additional industry reformulation would substantially increase policy impact. Greater health  
54  
55  
56  
57  
58  
59  
60

55 gains and cost savings were predicted among young adults, Hispanic and non-Hispanic Black  
56 individuals.

57 **Conclusions** Study findings suggest that menu calorie labeling is associated with lower obesity-  
58 related cancer burdens and reduced healthcare costs. Policymakers may prioritize nutrition  
59 policies for cancer prevention in the US.

60 (Word Count: 300)

61 **Keywords:** obesity, cost-effectiveness, menu calorie labeling, cancer incidence, cancer death,  
62 medical cost

#### 64 **Strengths and limitations of this study**

- 65 • Our study is among the first to demonstrate that the federal menu calorie labeling policy  
66 could be a cost-effective strategy to reduce obesity-related cancers in the US and  
67 potentially narrow diet-associated cancer disparities.
- 68 • This cost-effectiveness evaluation incorporated data input parameters from established  
69 resources and the evidence was robust to different policy scenarios.
- 70 • However, this modeling study does not provide a real-world evaluation of the impact of  
71 policy implementation on health and economic outcomes.
- 72 • We only modeled the impact of menu calorie labeling on calories although the policy  
73 may also result in potential changes in the nutritional quality of the restaurant meals.

## 74 INTRODUCTION

75 Obesity affects 1 in 3 Americans and is an established risk factor for 13 types of cancers, such as  
76 endometrial, liver, breast, prostate, and colorectal cancers.<sup>1</sup> Obesity-associated cancer represents  
77 40% of all newly diagnosed cancer cases and contributes to 43.5% of total direct cancer care  
78 expenditures, estimated at \$35.9 billion (US dollars) in 2015.<sup>1-7</sup> Rates of obesity-associated  
79 cancers are also rising disproportionately among young adults.<sup>5,8</sup> Substantial health and economic  
80 burdens highlight the need to prioritize cost-effective strategies to reduce obesity-associated  
81 cancers in the US.

82  
83 Diet is one of the few modifiable factors for both obesity and obesity-associated cancers.<sup>2,9</sup>  
84 Restaurant meals account for 1 in 5 calories consumed by US adults, including 9% of calories  
85 from full-service restaurants and 12% from fast-food restaurants,<sup>10</sup> and therefore, can be an  
86 important target for improving population diet. Restaurant meals can have very high calories,  
87 with a mean energy of 1362 kcal/meal and 969 kcal/meal in popular meals from randomly  
88 selected full-service and fast-food restaurants, respectively.<sup>11</sup> Consistently, individuals who cook  
89 less frequently at home consume more daily calories than those who cook more at home.<sup>12</sup> Thus,  
90 reducing calories consumed from restaurant meals has the potential to reduce daily calorie intake  
91 and subsequent obesity and obesity-related cancer burdens.

92  
93 To help consumers make lower-calorie choices, the Affordable Care Act mandated that all chain  
94 restaurants with 20 or more outlets post calorie information on menus and menu boards for all  
95 standard menu items.<sup>13</sup> The FDA published the final rules for this policy in 2016, which was  
96 subsequently implemented in 2018. A meta-analysis of 14 interventional studies including 5

1  
2  
3 97 randomized controlled trials (RCTs) and a recent quasi-experimental longitudinal study among  
4  
5 98 104 restaurants demonstrated that menu calorie labeling resulted in a reduction of 7.3% in caloric  
6  
7  
8 99 intake per meal and a 60 kcal (4%) reduction in calorie purchased per transaction, respectively.<sup>14</sup>  
9  
10 100 <sup>15</sup> Such policy can also motivate restaurant reformulation to lower calorie contents or introduce  
11  
12 101 healthier food options.<sup>16-21</sup> Prior cost-effectiveness analyses suggest that this policy is associated  
13  
14 102 with substantial health gains and is a cost-saving strategy for reducing obesity and obesity-  
15  
16 103 related diseases.<sup>22 23</sup> It was estimated that the menu calorie labeling on fast foods was associated  
17  
18 104 with a 25 kJ (6 kcal) reduction in mean daily energy intake, leading to a -0.2 kg change in mean  
19  
20 105 body weight, a gain of 63 492 health-adjusted life years, and net savings of half billion (2010  
21  
22 106 Australian dollars) among Australians aged 2 years and above over their lifetime.<sup>22</sup> Researchers  
23  
24 107 in the US have demonstrated that this policy would prevent a large number of incident  
25  
26 108 cardiovascular diseases (135 781) and type 2 diabetes (99 736) and net savings of over \$10  
27  
28 109 billion (2018 US dollars) among US adults over a lifetime.<sup>22 23</sup> However, the health and  
29  
30 110 economic benefits of the policy for obesity-associated cancers have not been evaluated. This  
31  
32 111 study aimed to address the knowledge gap by evaluating the cost-effectiveness of the federal  
33  
34 112 menu calorie labeling and obesity-associated cancer burdens among US adults.  
35  
36  
37  
38  
39  
40  
41

113

## 114 **METHODS**

### 115 **Study Overview**

116 The Diet and Cancer Outcome (DiCOM), a probabilistic cohort state-transition model,<sup>24 25</sup> was  
117 used to perform an economic evaluation of the menu calorie labeling and obesity-associated  
118 cancer rates among 235 million US adults aged 20 years and older (US Census), by comparing a  
119 policy scenario (menu calorie label) to status quo (no policy), over a simulated lifetime starting

1  
2  
3 120 from 2015. The model consists of (1) four health states: healthy without cancer, initial diagnosis  
4  
5 121 and treatment for 13 types of obesity-related cancers, continuous care for each of the 13 cancers,  
6  
7 122 and death (from 13 cancers or other causes); (2) the annual likelihood of changes in health; and  
8  
9  
10 123 (3) the lifetime consequences of such changes on health outcomes and economic costs.  
11  
12 124 (Supplementary Figure 1). The DiCOM model integrated independent parameters from different  
13  
14 125 data sources, including nationally representative population demographics, dietary intake, and  
15  
16 126 cancer statistics; association estimates of policy intervention with diet, diet change with body  
17  
18 127 mass index (BMI), and BMI with cancer risks; and policy and health-related costs from  
19  
20 128 established sources (**Table 1**). This study used de-identified datasets and was exempt from  
21  
22 129 institutional review board review and follows the Consolidated Health Economic Evaluation  
23  
24 130 Reporting Standards (CHEERS) reporting guidelines.  
25  
26  
27  
28  
29  
30  
31  
32  
33  
34  
35  
36  
37  
38  
39  
40  
41  
42  
43  
44  
45  
46  
47  
48  
49  
50  
51  
52  
53  
54  
55  
56  
57  
58  
59  
60

**Table 1. Key input parameters and data sources in the Dietary Cancer Outcome Model (DiCOM)**

| Model Input                                                                           | Outcome        | Estimates                                                                                                            | Distribution | Comments                                                                                                                                                                                                                                                           | Data Source                                                                                                                                                                                                                |
|---------------------------------------------------------------------------------------|----------------|----------------------------------------------------------------------------------------------------------------------|--------------|--------------------------------------------------------------------------------------------------------------------------------------------------------------------------------------------------------------------------------------------------------------------|----------------------------------------------------------------------------------------------------------------------------------------------------------------------------------------------------------------------------|
| 1. Simulated population                                                               | Population     | Mean consumption of calories was 332 kcal/d from full-service or fast-food restaurants (Supplementary Tables 1, 8-9) | Gamma        | Stratified by age, sex, race/ethnicity; 32 subgroups                                                                                                                                                                                                               | NHANES 2013-2016                                                                                                                                                                                                           |
| 2. Policy effect <sup>1</sup>                                                         |                |                                                                                                                      |              |                                                                                                                                                                                                                                                                    |                                                                                                                                                                                                                            |
| a) Consumer behavior                                                                  | Policy effect  | 7.3% (4.4%-10.1%) (Appendix 1 and Appendix Table 1)                                                                  | Beta         | One-time effect                                                                                                                                                                                                                                                    | Meta-analysis of labeling interventions on reducing calorie intake, Shangguan et al., 2019, American Journal of Preventative Medicine                                                                                      |
| b) Industry response                                                                  | Policy effect  | 5% (Appendix 1 and Appendix Table 2)                                                                                 | Beta         | Assumption: no reformulation in the 1st year of policy intervention; Restaurants will replace the high-calorie menu items with low-calorie options or reformulate the menu items in years 2 to 5 of the intervention to achieve a 5% reduction in calorie contents | Calorie changes in large chain restaurants from 2008 to 2015, Bleich et al. 2017, Prev Med; Higher-Calorie Menu Items Eliminated in Large Chain Restaurants, Bleich et al. 2018, American Journal of Preventative Medicine |
| 3. Effect of change in calorie intake on BMI change (kg/m <sup>2</sup> ) <sup>1</sup> | Dietary effect | Among individuals with: BMI <25: 0.0015 per kcal BMI ≥25: 0.003 per kcal                                             | Normal       | Assumption: 55 kcal per day reduction in calorie intake would lead to 1 pound weight loss within 1 year, with no further weight loss in the future                                                                                                                 | Hall et al., 2018, JAMA; Hall et al., 2011, Lancet                                                                                                                                                                         |
| 4. Etiologic effect of BMI on cancer outcomes <sup>1</sup>                            | Cancer outcome | RRs ranged from 1.05 to 1.50 (Supplementary Table 2)                                                                 | Lognormal    | BMI change and cancer incidence                                                                                                                                                                                                                                    | Continuous Update Project (CUP) conducted by the World Cancer Research Fund (WCRF)/American                                                                                                                                |



|                                                        |                                                                 |                                                                   |       |                                                                                                     |                                                                                                                                        |
|--------------------------------------------------------|-----------------------------------------------------------------|-------------------------------------------------------------------|-------|-----------------------------------------------------------------------------------------------------|----------------------------------------------------------------------------------------------------------------------------------------|
|                                                        |                                                                 |                                                                   |       |                                                                                                     | Institute for Cancer Research (AICR)                                                                                                   |
| 5. Cancer statistics <sup>1</sup>                      | Cancer incidence <sup>3</sup> and survival                      | Appendixes 2-3, Appendix Tables 2-3, and Supplementary Tables 3-4 | Beta  | Stratified by age, sex, and race/ethnicity                                                          | NCI's Surveillance, Epidemiology, and End Results Program (SEER) Database; CDC's National Program of Cancer Registries (NPCR) Database |
| 6. Healthcare-related costs <sup>1,2</sup>             | Medical expenditures, productivity loss, and patient time costs | Appendix 6, Appendix Table 6, and Supplementary Tables 6-7        | Gamma | Stratified by age, and sex                                                                          | NCI's Cancer Prevalence and Cost of Care Projections; Published literature                                                             |
| 7. Policy costs <sup>1,2</sup>                         | For government and industry                                     | Appendix 5 and Appendix Tables 4-5                                | Gamma | Administration and monitoring costs for government; compliance and reformulation costs for industry | FDA's budget report; Nutrition Review Project; and FDA's RIA                                                                           |
| 8. Health-related quality of life (HRQOL) <sup>1</sup> | For 13 types of cancers                                         | Ranged from 0.64 to 0.86 (Appendix 4 and Supplementary Table 5)   | Beta  | EQ-5D <sup>4</sup> data from published literature by cancer type                                    | Published literature                                                                                                                   |

Abbreviations: BMI, Body Mass Index; FDA, Food and Drug Administration; NCI, National Cancer Institute; NHANES, National Health, and Nutrition Examination Survey; UK, United Kingdom.

1. Uncertainty distributions were incorporated in the probabilistic sensitivity analyses. Uncertainties in each parameter were presented in supplemental materials (Table TS3 and Tables S3-9).

2. If the source did not provide uncertainty estimates, we assumed the standard errors were 20% of the mean estimate to generate gamma distribution.

3. Time-varying input parameter, for which the model accounted the secular trends. Details were provided in the Supplements.

4. EQ-5D is a standardized instrument developed by the EuroQol Group as a measure of health-related quality of life that can be used in a wide range of health conditions and treatments.

### 131 **Simulated US Population**

132 Because FDA's final rules on menu calorie labeling were published in 2016 and implemented in  
133 2018, considering that some restaurants have implemented this policy prior to 2016 given the  
134 law was passed in 2010, we used 2015-2016 as the baseline and assumed a closed cohort for this  
135 analysis. The projected population size of US adults aged 20+ in 2015-2016 was obtained from  
136 the US Census data.<sup>26</sup> We combined the 2013-2016 National Health and Nutrition Examination  
137 Survey (NHANES) to approximate the baseline and simulate the nationally representative US  
138 adult population aged 20+ years in 32 subgroups stratified by age (20-44, 45-54, 55-64, 65+), sex  
139 (men, women), and race/ethnicity (non-Hispanic White, non-Hispanic Black, Hispanic, Other)  
140 (Supplementary Table 1). This closed cohort of US adults was modeled from baseline through  
141 their lifetime up to 80 years or until death.

### 143 **Calorie Consumption from Restaurants**

144 Mean calorie consumption from full-service and fast-food restaurants, demographics, and  
145 prevalence of overweight or obesity were estimated using data collected from NHANES  
146 participants with at least one valid 24-hour diet recall, in every 32 strata. Following FDA's  
147 estimates,<sup>13</sup> we assumed that policy would affect 56.5% of calories consumed at full-service  
148 restaurants and 100% at fast-food restaurants. The National Cancer Institute method was used to  
149 estimate the usual intake distribution by statistically adjusting for within vs. between variance in  
150 dietary recalls.<sup>27-29</sup> The complex survey design was incorporated in all statistical analyses to  
151 ensure the representativeness of study findings to the non-institutionalized US adults.

152

### 153 **Policy Association with Calorie Consumption**

154 Policy association with consumer behaviors was obtained from a systematic review and meta-  
155 analysis of 13 interventional studies (5 RCTs) with 19 interventions conducted in fast-food, full-  
156 service, cafeterias, and laboratories between 2000 and 2015 that evaluated the effectiveness of  
157 menu calorie labeling on consumers' calorie consumption per meal (Appendix 1 and Appendix  
158 Table 1).<sup>15</sup> The study results showed a 7.3% (95% CI: 4.4%-10.1%) reduction in calories  
159 consumed per meal following calorie labeling. We assumed that the policy would have a one-  
160 time effect over one year, with no further change over time.

161  
162 Policy intervention may stimulate industries to reformulate their products to lower the calorie  
163 content. Potential policy impact on industry reformulation was derived from studies of restaurant  
164 menu items following the passage and initial period of partial implementation of the final rules  
165 (Appendix Table 2). Between 2012-2014, among 66 of the 100 largest US chain restaurants,  
166 replacing higher-calorie menu items with lower-calorie items led to a 1-5% calorie reduction per  
167 menu item.<sup>19 20</sup> Among 44 chain restaurants with menu calorie information available in 2008, the  
168 calories per menu item fell by 7% between 2008 and 2015.<sup>18</sup> Based on the evidence, we chose  
169 5% as the mid-point for the potential policy impact on industry response, which may include  
170 discontinuation of existing high-calorie menu items and/or introduction of lower-calorie menu  
171 items. We assumed that no reformulation occurs in the 1st year of policy intervention, and  
172 restaurants will replace the high-calorie menu items with low-calorie options or reformulate the  
173 menu items in years 2 to 5 of the intervention to achieve a 5% reduction in calorie content, with  
174 no change thereafter. Combining the effect on consumer behaviors with the effect on industry  
175 response, the policy would lead to a 12.3% reduction in calories consumed per meal.

1  
2  
3 176  
4  
5 177 In addition, we conservatively assumed that there would be some compensatory increased calorie  
6  
7 178 intake outside of restaurants so that only half of all calories reduced from restaurant meals would  
8  
9 179 translate into long-term reductions in daily calories (compensation rate = 50%). Therefore, the  
10  
11 180 reduction in calorie consumption from fast-food or full-service restaurants among the simulated  
12  
13 181 population was computed using the baseline consumption times the policy effect estimates, and  
14  
15 182 then times the compensation rate.  
16  
17  
18  
19 183  
20  
21

### 22 184 **Calorie Reduction and Obesity-Associated Cancer Risk**

23  
24 185 To estimate the relationships between calorie intake and obesity-associated cancers, we  
25  
26 186 associated the multivariate-adjusted association of change in calorie intake (kcal/day) with  
27  
28 187 change in BMI (kg/m<sup>2</sup>) and the estimates of BMI and cancer risks. Based on an established  
29  
30 188 energy-weight dynamic model that accounted for the long-term impacts of calorie reduction on  
31  
32 189 weight and metabolic expenditure, we assumed that each 55 kcal/day calorie reduction leads to 1  
33  
34 190 pound weight loss over one year among overweight or obese adults, with no further reduction  
35  
36 191 thereafter.<sup>30 31</sup> Because long-term observational studies suggest that weight change for an  
37  
38 192 equivalent change in dietary intake is about twice as large in overweight or obese adults than  
39  
40 193 normal-weight adults,<sup>32 33</sup> we conservatively applied half of this estimate to individuals with  
41  
42 194 normal weight. For each of the 13 obesity-related cancers, the estimated change in risk for each 5  
43  
44 195 kg/m<sup>2</sup> change in BMI was derived from the systematic reviews and meta-analyses of  
45  
46 196 multivariable-adjusted prospective cohort studies conducted by the World Cancer Research  
47  
48 197 Fund/American Institute for Cancer Research Continuous Update Project and the International  
49  
50 198 Agency for Research on Cancer (Supplementary Table 2).<sup>2</sup>  
51  
52  
53  
54  
55  
56  
57  
58  
59  
60

199

## 200 **Cancer Incidence, Mortality, and Health-Related Quality of Life**

201 Age-adjusted cancer incidences in 2015 were obtained from the National Program of Cancer  
202 Registries and the Surveillance, Epidemiology, and End Results (SEER) program. We projected  
203 the cancer incidence from 2015 to 2030 based on the 2006-2014 trend using the Average Annual  
204 Percent Change method.<sup>34</sup> We then combined the projected incidence rates with the projected US  
205 population from the National Interim Projections<sup>35</sup> to account for changes in population age  
206 distribution over time. We further applied the cohort-period method to estimate cancer incidence  
207 in the closed cohort of US adults in each of the 32 groups as they age (Appendix 2, Appendix  
208 Table 2, and Supplementary Table 3). The 5-year relative survival rates for each cancer were  
209 extracted and converted to an annual probability of death (Appendix 3, Appendix Table 3, and  
210 Supplementary Table 4).<sup>36-38</sup> Health-related quality of life data were obtained from publications  
211 that reported EuroQol-5 Dimension utility weights for each cancer among US patient population  
212 (Appendix 4 and Supplementary Table 5).

213

## 214 **Policy and Health-Related Costs**

215 Policy costs included government costs to administer, monitor, and evaluate the policy and  
216 industry costs to comply with the policy and reformulate their products (in scenario 2).  
217 Government costs were estimated from FDA's budget report and Nutrition Review Project  
218 (Appendix 5 and Appendix Tables 4-5).<sup>39 40</sup> Industry compliance and reformulation costs were  
219 based on the FDA's regulatory impact analysis that included initial and recurring nutrition  
220 analysis of standard menu items and menu replacement, provision of nutrition information,

221 employee training, and legal review and accounted for restaurant size and type, reformulation  
222 type, and compliance period.<sup>13</sup>

223  
224 Direct medical costs for cancer care were extracted from the SEER-Medicare linked database for  
225 three phases of cancer care: initial (12 months after diagnosis), continuing, and end-of-life (the  
226 last year of life) (Appendix 6, Appendix Table 6, and Supplementary Tables 6-7).<sup>34 41</sup> For  
227 individuals without cancer, the direct medical costs were estimated based on Medical  
228 Expenditure Panel Survey (MEPS) data and insurance claims.<sup>25 42 43</sup> Indirect costs including  
229 productivity loss due to disability or missed workdays and patient time costs were derived from  
230 publications using MEPS data.<sup>44-47</sup>

231

### 232 **Cost-Effectiveness Analysis**

233 Following the guidelines on cost-effectiveness in health and medicine,<sup>48</sup> we evaluated the policy  
234 impact by projecting the numbers of new cancer cases and cancer deaths averted and quality-  
235 adjusted life-years (QALYs) gained and cost-effectiveness from both healthcare and societal  
236 perspectives. Net costs from the healthcare perspective were assessed as the difference between  
237 government costs for implementing the policy and the direct medical costs of cancer care. Net  
238 costs from the societal perspective were assessed as the difference between total policy costs  
239 (including both government and industry costs) and health-related costs saved (including direct  
240 and indirect costs of cancer care). All costs were inflated to 2015 US dollars using the Consumer  
241 Price Index or Personal Health Care Index, with all costs and QALYs discounted at 3%  
242 annually.<sup>48</sup> Incremental cost-effectiveness ratios (ICERs) were calculated as net costs divided by  
243 the difference in QALYs between policy vs. no policy. ICERs falling below a willingness-to-pay

1  
2  
3 244 threshold of \$150,000 per QALY gained were considered to be cost-effective.<sup>49 50</sup> Cost-  
4  
5 245 effectiveness analysis was further conducted among population subgroups by age, sex, and  
6  
7 246 race/ethnicity to evaluate policy associations with health disparities.  
8  
9

10 247  
11  
12  
13 248 One-way sensitivity analyses were performed by varying input parameters, including reducing  
14  
15 249 the outside-the-restaurant calorie compensation level to 25% or increasing it to 75%, altering  
16  
17 250 coverage of the FDA's final rule to all calories from full-service restaurants, reducing the diet-  
18  
19 251 BMI associations to half or doubling the estimates, incorporating an estimated 2% annual  
20  
21 252 increase in medical expenditures associated with cancer care, and altering annual discounting  
22  
23 253 rates from 3% to 0% or 5%. We also evaluated impacts at a 10-year time horizon for  
24  
25 254 stakeholders interested in shorter-term health gains and economic benefits. Probabilistic  
26  
27 255 sensitivity analyses (PSAs) were conducted to incorporate uncertainty in all input parameters  
28  
29 256 jointly (**Table 1**). A total of 1000 Monte Carlo simulations were performed, and 95% uncertainty  
30  
31 257 intervals (UIs) were estimated based on the 2.5 and 97.5 percentiles of 1,000 simulations. All  
32  
33 258 analyses were conducted using SAS (Version 9.4) and R (Version 3.3.1).  
34  
35  
36  
37  
38  
39  
40

## 41 260 **Patient and Public Involvement**

42  
43  
44 261 This study used de-identified datasets and did not involve patients or the public in the design,  
45  
46 262 conduct, reporting, or dissemination plans of our research.  
47  
48  
49  
50  
51  
52  
53  
54  
55  
56  
57  
58  
59  
60

## 263 RESULTS

### 264 Population Characteristics

265 The simulated cohort of US adults in 2015-2016 had a mean age of 47.8 years, with 65.0% being  
266 non-Hispanic white adults and 71.4% being overweight or obese (Supplementary Tables 8-9). A  
267 mean of 332 daily calories was consumed from full-service or fast-food restaurants. Higher  
268 levels were consumed among younger adults aged 20-44 years (425 kcal/day), men (388  
269 kcal/day), non-Hispanic black (361 kcal/day), and Hispanic (367 kcal/day) adults, in comparison  
270 to other corresponding subgroups.

271

### 272 Health Gains

273 The menu calorie labeling was estimated to reduce calories consumed from restaurants by a  
274 mean of 24 kcal/day among US adults, and total daily calories by 12 kcal/day. Accounting for  
275 potential industry reformulation would reduce the mean intake by an additional 16 kcal/day, and  
276 total daily calories by 8 kcal/day.

277

278 Based on changes in consumer behavior alone, the policy was associated with a reduction of  
279 28,000 (95% UI: 16,300-39,100) new cancer cases and 16,700 (9,610-23,600) cancer deaths, and  
280 a gain of 111,000 (64,800-158,000) QALYs among 235 million US adults over a median follow-  
281 up of 34.4 years (**Table 2 and Figure 1**). By cancer type, the greatest numbers of new cancer  
282 cases averted were cancers of endometrial (N [95% UI]: 5,700 [2,380-9,190]), liver (5,180  
283 [2,800-7,730]), kidney (5,090 [2,670-7,730]), post-menopausal breast (4,840 [2,010-8,230]), and  
284 pancreas (1,400 [756-2,100]). The greatest numbers of prevented cancer deaths were estimated  
285 for cancers of the liver (4,530 [2,410-6,760]), post-menopausal breast (3,080 [861-5,650]),



1  
2  
3 286 endometrial (2,060 [957-3,220]), kidney (1,980 [1,080-2,920]), and pancreas (1,230 [661-  
4  
5 287 1,830]).  
6  
7

8 288  
9

10 289 Based on additional industry response, the total estimated health gains approximately doubled,  
11  
12 290 preventing 47,300 (35,400-59,100) new cancer cases and 28,200 (21,100-35,300) cancer deaths,  
13  
14 291 and gaining 189,000 (140,000-236,000) QALYs, with similar rankings of the types of new  
15  
16  
17 292 cancer cases and cancer deaths prevented.  
18  
19  
20  
21  
22  
23  
24  
25  
26  
27  
28  
29  
30  
31  
32  
33  
34  
35  
36  
37  
38  
39  
40  
41  
42  
43  
44  
45  
46  
47  
48  
49  
50  
51  
52  
53  
54  
55  
56  
57  
58  
59  
60

**Table 2. Estimated health gains and costs of the federal menu calorie labeling on reducing the obesity-related cancer burdens in the US over 10 years and a lifetime (US population=235,162,844)<sup>1</sup>**

|                                             | Menu Calorie Labeling Policy                |                                                                    |                                             |                                                                    |
|---------------------------------------------|---------------------------------------------|--------------------------------------------------------------------|---------------------------------------------|--------------------------------------------------------------------|
|                                             | 10 Years                                    |                                                                    | Lifetime                                    |                                                                    |
|                                             | Consumer Behavior<br>Median (2.5% to 97.5%) | Consumer Behavior +<br>Industry Response<br>Median (2.5% to 97.5%) | Consumer Behavior<br>Median (2.5% to 97.5%) | Consumer Behavior +<br>Industry Response<br>Median (2.5% to 97.5%) |
| <b>New Cancer Cases Averted, N (95% UI)</b> |                                             |                                                                    |                                             |                                                                    |
| Endometrial cancer                          | 692 (276 to 1100)                           | 1130 (716 to 1550)                                                 | 5700 (2380 to 9190)                         | 9920 (6630 to 13600)                                               |
| Liver cancer                                | 366 (144 to 615)                            | 626 (386 to 887)                                                   | 5180 (2800 to 7730)                         | 8550 (5960 to 11300)                                               |
| Kidney cancer                               | 584 (290 to 884)                            | 980 (689 to 1280)                                                  | 5090 (2670 to 7470)                         | 8620 (6200 to 11000)                                               |
| Breast cancer (postmenopausal)              | 670 (256 to 1110)                           | 1080 (658 to 1520)                                                 | 4840 (2010 to 8230)                         | 8520 (5610 to 12200)                                               |
| Pancreatic cancer                           | 170 (83 to 257)                             | 273 (183 to 367)                                                   | 1400 (756 to 2100)                          | 2380 (1690 to 3140)                                                |
| Esophageal adenocarcinoma                   | 179 (56 to 304)                             | 286 (159 to 411)                                                   | 1350 (485 to 2230)                          | 2330 (1440 to 3280)                                                |
| Colorectal cancer                           | 189 (97 to 284)                             | 319 (225 to 418)                                                   | 1050 (561 to 1600)                          | 1780 (1230 to 2370)                                                |
| Multiple myeloma                            | 75 (37 to 117)                              | 122 (81 to 169)                                                    | 690 (384 to 1090)                           | 1150 (775 to 1630)                                                 |
| Stomach cancer (cardia)                     | 54 (6 to 109)                               | 98 (51 to 165)                                                     | 647 (261 to 1140)                           | 1090 (644 to 1660)                                                 |
| Thyroid cancer                              | 105 (58 to 161)                             | 176 (123 to 243)                                                   | 516 (206 to 914)                            | 951 (576 to 1420)                                                  |
| Advanced prostate cancer                    | 66 (17 to 118)                              | 107 (57 to 162)                                                    | 339 (138 to 561)                            | 577 (352 to 836)                                                   |
| Gallbladder cancer                          | 29 (16 to 42)                               | 46 (34 to 60)                                                      | 314 (213 to 438)                            | 512 (399 to 648)                                                   |
| Ovarian cancer                              | 33 (15 to 56)                               | 53 (33 to 78)                                                      | 147 (44 to 282)                             | 254 (110 to 420)                                                   |
| Total                                       | 3300 (1750 to 4720)                         | 5230 (3870 to 6790)                                                | 28000 (16300 to 39100)                      | 47300 (35400 to 59100)                                             |
| <b>Cancer Deaths Prevented, N (95% UI)</b>  |                                             |                                                                    |                                             |                                                                    |
| Liver cancer                                | 168 (59 to 287)                             | 287 (174 to 410)                                                   | 4530 (2410 to 6760)                         | 7510 (5200 to 9980)                                                |
| Breast cancer (postmenopausal)              | 68 (33 to 106)                              | 111 (74 to 149)                                                    | 3080 (862 to 5650)                          | 5590 (3230 to 8310)                                                |
| Endometrial cancer                          | 52 (20 to 86)                               | 87 (55 to 121)                                                     | 2060 (957 to 3220)                          | 3520 (2390 to 4700)                                                |
| Kidney cancer                               | 70 (29 to 110)                              | 114 (74 to 154)                                                    | 1980 (1080 to 2920)                         | 3320 (2430 to 4300)                                                |
| Pancreatic cancer                           | 88 (38 to 138)                              | 143 (93 to 195)                                                    | 1230 (661 to 1830)                          | 2080 (1480 to 2740)                                                |
| Esophageal adenocarcinoma                   | 76 (21 to 131)                              | 122 (69 to 178)                                                    | 1150 (403 to 1930)                          | 1990 (1210 to 2820)                                                |
| Colorectal cancer                           | 34 (17 to 53)                               | 57 (40 to 77)                                                      | 706 (369 to 1080)                           | 1200 (839 to 1600)                                                 |
| Stomach cancer (cardia)                     | 22 (2 to 48)                                | 40 (19 to 68)                                                      | 541 (230 to 947)                            | 907 (538 to 1400)                                                  |
| Multiple myeloma                            | 18 (8 to 30)                                | 29 (18 to 42)                                                      | 420 (239 to 662)                            | 691 (481 to 980)                                                   |
| Gallbladder cancer                          | 13 (7 to 20)                                | 21 (15 to 28)                                                      | 267 (181 to 369)                            | 436 (341 to 551)                                                   |
| Advanced prostate cancer                    | 9 (3 to 15)                                 | 13 (7 to 19)                                                       | 163 (65 to 280)                             | 273 (163 to 404)                                                   |
| Ovarian cancer                              | 8 (3 to 15)                                 | 13 (7 to 20)                                                       | 107 (39 to 191)                             | 181 (94 to 290)                                                    |
| Thyroid cancer                              | 1 (1 to 2)                                  | 2 (1 to 3)                                                         | 23 (11 to 38)                               | 38 (24 to 58)                                                      |
| Total                                       | 654 (320 to 970)                            | 1080 (746 to 1400)                                                 | 16700 (9610 to 23600)                       | 28200 (21100 to 35300)                                             |
| <b>Life Years Gained</b>                    | 678 (288 to 1040)                           | 1120 (738 to 1490)                                                 | 76400 (43400 to 109000)                     | 130000 (96900 to 162000)                                           |
| <b>QALYs Gained</b>                         | 4280 (2170 to 6250)                         | 7030 (4960 to 9090)                                                | 111000 (64800 to 158000)                    | 189000 (140000 to 236000)                                          |

1  
2  
3  
4  
5  
6  
7  
8  
9  
10  
11  
12  
13  
14  
15  
16  
17  
18  
19  
20  
21  
22  
23  
24  
25  
26  
27  
28  
29  
30  
31  
32  
33  
34  
35  
36  
37  
38  
39  
40  
41  
42  
43  
44  
45  
46  
47**Changes in Health-Related Costs** (\$, millions)<sup>2,3</sup>

|                           |                        |                        |                       |                        |
|---------------------------|------------------------|------------------------|-----------------------|------------------------|
| Healthcare (medical) cost | -192 (-277 to -100)    | -319 (-403 to -227)    | -1480 (-2080 to -884) | -2500 (-3090 to -1900) |
| Patient time cost         | -7.33 (-10.9 to -3.56) | -12.2 (-15.8 to -8.39) | -102 (-144 to -62.2)  | -172 (-216 to -131)    |
| Productivity loss         | -48.7 (-70.1 to -24.5) | -80.4 (-102 to -56.7)  | -608 (-865 to -363)   | -1030 (-1290 to -780)  |

**Policy Implementation Costs** (\$, millions)<sup>2,3</sup>

|                 |                     |                     |                     |                     |
|-----------------|---------------------|---------------------|---------------------|---------------------|
| Total           | 518 (493 to 548)    | 644 (612 to 680)    | 839 (780 to 908)    | 1140 (1060 to 1220) |
| Government cost | 13.2 (11.4 to 15.9) | 13.1 (11.4 to 15.7) | 18.5 (14.5 to 25.1) | 18.5 (14.4 to 25.5) |
| Administration  | 9.08 (8.59 to 9.60) | 9.07 (8.64 to 9.50) | 9.07 (8.61 to 9.56) | 9.09 (8.62 to 9.55) |
| Monitoring      | 4.09 (2.40 to 6.74) | 4.00 (2.35 to 6.63) | 9.40 (5.45 to 16.1) | 9.38 (5.30 to 16.3) |
| Industry cost   | 505 (480 to 535)    | 631 (599 to 667)    | 820 (762 to 889)    | 1120 (1040 to 1210) |
| Compliance      | 505 (480 to 535)    | 506 (480 to 533)    | 820 (762 to 889)    | 823 (757 to 889)    |
| Reformulation   | -----               | 124 (107 to 146)    | -----               | 296 (249 to 353)    |

**Net Costs** (\$, millions)<sup>2,3,4</sup>

|                        |                      |                     |                       |                        |
|------------------------|----------------------|---------------------|-----------------------|------------------------|
| Societal perspective   | 270 (156 to 389)     | 233 (119 to 356)    | -1350 (-2260 to -486) | -2570 (-3460 to -1650) |
| Healthcare perspective | -179 (-263 to -86.3) | -305 (-390 to -214) | -1460 (-2060 to -864) | -2480 (-3070 to -1880) |

**ICER** (dollars/QALY)<sup>5</sup>

|                        |                         |                        |          |          |
|------------------------|-------------------------|------------------------|----------|----------|
| Societal perspective   | 64500 (26100 to 187000) | 33600 (13300 to 72400) | Dominant | Dominant |
| Healthcare perspective | Dominant                | Dominant               | Dominant | Dominant |

Abbreviations: ICER, Incremental Cost-Effectiveness Ratio; QALY, quality-adjusted life years.

1. Values are the median estimates (95% uncertainty intervals) of each distribution of 1000 simulations.

2. Health-related costs were inflated to 2015 US dollars using the Personal Health Care (PHC) index. Policy intervention costs were inflated to 2015 US dollars using the Consumer Price Index. Negative costs represent savings.

3. Costs are medians from 1000 simulations so may not add up to totals.

4. Net costs were calculated as policy costs minus health-related costs from reduced cancer burden. The societal perspective includes healthcare costs, patient time costs, productivity costs, and policy implementation costs; the government perspective included policy costs relevant to policy implementation and program monitoring and evaluation, and medical costs.

5. ICER threshold was evaluated at \$150,000/QALY. Dominant represents less costly and more effective than the "no-policy intervention" scenario.

## 293 **Economic Impacts**

294 Implementing the policy would cost the government \$19 (95% UI: \$15-25) million and the  
295 restaurant industry, \$820 (\$762-889) million in compliance costs over a lifetime (**Table 2**). The  
296 policy was associated with savings of \$1480 (\$884-2080) million in direct medical costs, \$608  
297 (\$363-865) million in productivity loss costs, and \$102 (\$62-144) million in patient time costs.  
298 Potential industry reformulation would cost the restaurant industry an additional \$296 (\$249-  
299 353) million to implement but would also result in greater healthcare savings, including \$2,500  
300 (\$1,900-3,090) million, \$1,030 (\$780-1,290) million and \$172 (\$131-216) million in reduced  
301 direct medical, productivity loss, and patient time costs, respectively.

302  
303 From both the healthcare and social perspectives, implementing the menu calorie labeling policy  
304 among US adults over a lifetime would be cost-saving. With changes in consumer behavior  
305 alone, the net cost savings were estimated to be \$1,460 (\$864-2,060) million and \$1,350 (\$486-  
306 2,260) million from the healthcare and societal perspective, respectively. With additional  
307 industry response, estimated cost savings increased to \$2,480 (\$1,880-3,070) million from the  
308 healthcare perspective and \$2,570 (\$1,650-3,460) million from the societal perspective.

## 310 **Policy Impacts Among Population Subgroups**

311 Among population subgroups, the consumer response to the policy was estimated to result in  
312 greater health gains per 100,000 individuals among adults aged 20-44 years (15 new cancer cases  
313 averted) and 55-64 years (16 new cancer cases averted) than older age groups (aged 65+ years; 6  
314 new cancer cases averted); Hispanic and non-Hispanic Black individuals than Non-Hispanic  
315 White group (22 vs. 9 and 17 vs. 9 new cancer cases averted) (**Table 3**). The numbers of cancer

1  
2  
3 316 deaths averted, life-years and QALYs gained, health-related costs saved, and net costs among  
4  
5 317 population subgroups followed a similar pattern (Supplementary Tables 10-11 and  
6  
7 318 Supplementary Figures 2-5). For instance, the policy was associated with more cancer deaths  
8  
9 319 prevented per 100,000 individuals among younger adults aged 20-44 years than older adults aged  
10  
11 320 65+ years (10 vs. 3 cancer deaths averted) and Hispanic and non-Hispanic Black adults than non-  
12  
13 321 Hispanic White individuals (14 vs. 5 and 11 vs. 5 cancer deaths averted). Adding potential  
14  
15 322 industry reformulations resulted in larger health gains among adults aged 45-54 (128% increase  
16  
17 323 in new cancer cases averted) and non-Hispanic White adults (84% increase in new cancer cases  
18  
19 324 averted).  
20  
21  
22  
23  
24  
25  
26  
27  
28  
29  
30  
31  
32  
33  
34  
35  
36  
37  
38  
39  
40  
41  
42  
43  
44  
45  
46  
47  
48  
49  
50  
51  
52  
53  
54  
55  
56  
57  
58  
59  
60

**Table 3. Estimated new cancer cases and deaths prevented by the federal menu calorie labeling policy in the US by age, sex, and race/ethnicity, over a lifetime<sup>1</sup>**

|                                 | Consumer Behavior     |                                  | Consumer Behavior + Industry Response |                                  |
|---------------------------------|-----------------------|----------------------------------|---------------------------------------|----------------------------------|
|                                 | N (95% UI)            | Per 100,000 individuals (95% UI) | N (95% UI)                            | Per 100,000 individuals (95% UI) |
| <b>New Cancer Cases Averted</b> |                       |                                  |                                       |                                  |
| Age                             |                       |                                  |                                       |                                  |
| 20-44                           | 15700 (6170 to 25100) | 15.0 (5.89 to 24.0)              | 28000 (18000 to 37500)                | 26.7 (17.2 to 35.8)              |
| 45-54                           | 2810 (-2110 to 8030)  | 6.61 (-4.97 to 18.9)             | 6420 (1390 to 11600)                  | 15.1 (3.27 to 27.2)              |
| 55-64                           | 6330 (3540 to 9400)   | 15.7 (8.76 to 23.3)              | 8640 (5790 to 11800)                  | 21.4 (14.3 to 29.1)              |
| ≥65                             | 2740 (795 to 4650)    | 5.77 (1.68 to 9.80)              | 4060 (2070 to 5950)                   | 8.55 (4.36 to 12.6)              |
| Sex                             |                       |                                  |                                       |                                  |
| Female                          | 15100 (6650 to 24000) | 12.5 (5.51 to 19.8)              | 25900 (17400 to 34900)                | 21.4 (14.4 to 28.9)              |
| Male                            | 12500 (4920 to 20100) | 10.9 (4.30 to 17.6)              | 21100 (13500 to 29100)                | 18.4 (11.8 to 25.4)              |
| Race/Ethnicity                  |                       |                                  |                                       |                                  |
| Non-Hispanic White              | 14300 (4310 to 24500) | 9.16 (2.77 to 15.7)              | 26300 (16000 to 36700)                | 16.9 (10.3 to 23.6)              |
| Non-Hispanic Black              | 4720 (1820 to 8100)   | 16.6 (6.37 to 28.4)              | 7630 (4750 to 11100)                  | 26.8 (16.7 to 38.9)              |
| Hispanic                        | 7700 (3560 to 11500)  | 21.5 (9.93 to 32.2)              | 11200 (7060 to 15300)                 | 31.3 (19.7 to 42.6)              |
| Other                           | 1150 (-240 to 2440)   | 7.60 (-1.59 to 16.2)             | 1990 (652 to 3310)                    | 13.2 (4.33 to 22.0)              |
| <b>Cancer Deaths Prevented</b>  |                       |                                  |                                       |                                  |
| Age                             |                       |                                  |                                       |                                  |
| 20-44                           | 10200 (4170 to 16400) | 9.73 (3.98 to 15.7)              | 18100 (11700 to 24500)                | 17.3 (11.2 to 23.4)              |
| 45-54                           | 1730 (-853 to 4240)   | 4.07 (-2.01 to 9.97)             | 3650 (1040 to 6240)                   | 8.58 (2.44 to 14.7)              |
| 55-64                           | 3320 (1760 to 4930)   | 8.21 (4.36 to 12.2)              | 4480 (2890 to 6090)                   | 11.1 (7.15 to 15.1)              |
| ≥65                             | 1200 (285 to 2130)    | 2.53 (0.60 to 4.48)              | 1800 (848 to 2720)                    | 3.79 (1.79 to 5.73)              |
| Sex                             |                       |                                  |                                       |                                  |
| Female                          | 7810 (3290 to 12600)  | 6.47 (2.73 to 10.5)              | 13400 (8850 to 18500)                 | 11.1 (7.33 to 15.3)              |
| Male                            | 8510 (3500 to 13900)  | 7.44 (3.06 to 12.1)              | 14400 (9300 to 20000)                 | 12.6 (8.13 to 17.5)              |
| Race/Ethnicity                  |                       |                                  |                                       |                                  |
| Non-Hispanic White              | 7920 (2180 to 13900)  | 5.08 (1.40 to 8.94)              | 14700 (8770 to 20900)                 | 9.45 (5.64 to 13.5)              |
| Non-Hispanic Black              | 3010 (1000 to 5370)   | 10.6 (3.51 to 18.8)              | 4990 (2950 to 7380)                   | 17.5 (10.4 to 25.9)              |
| Hispanic                        | 4960 (2360 to 7560)   | 13.8 (6.58 to 21.1)              | 7190 (4480 to 9870)                   | 20.0 (12.5 to 27.5)              |
| Other                           | 565 (-246 to 1350)    | 3.75 (-1.63 to 8.97)             | 1070 (273 to 1870)                    | 7.12 (1.81 to 12.4)              |

1. Values are the median estimates (95% uncertainty intervals) of each distribution of 1000 simulations.

## 325 **Sensitivity Analyses**

326 In PSA, based on consumer responses alone, the menu calorie labeling was cost-saving over a  
327 lifetime in 93% of 1000 simulations and cost-effective (<\$150,000/QALY) in the remaining 7%  
328 from the societal perspective, and was cost-saving in over 98% of 1000 simulations from the  
329 healthcare perspective. Adding the additional industry response increased the probability of cost-  
330 savings to nearly 100% of the simulations for both the societal and healthcare perspectives  
331 **(Figure 2).**

332  
333 Evaluating health gains, costs, and cost-effectiveness at 10 years, the policy remained cost-  
334 saving from the healthcare perspective and was cost-effective from the societal perspective, with  
335 an ICER of \$64,500 (26,100-187,000) per QALY based on consumer response alone and  
336 \$33,600 (13,300-72,400) per QALY with additional industry response. The cost-effectiveness of  
337 this policy was most sensitive to varied assumptions of the diet-BMI estimates and annual  
338 discounting rates (Supplementary Tables 12-13 and Supplementary Figure 6).

## 340 **DISCUSSION**

341 This study estimated that the federal menu calorie labeling policy, based on consumer response  
342 alone, was associated with a reduction of approximately 28,000 new cancer cases and 16,700  
343 cancer deaths among US adults over a lifetime, and net savings of \$1,350 and \$1,460 million  
344 from societal and healthcare perspectives, respectively. Incorporating additional modest industry  
345 responses, these health and economic gains were approximately doubled. Greater health gains  
346 were expected among younger, middle-aged subgroups, Hispanic, and non-Hispanic Black

1  
2  
3 347 individuals compared with other subgroups. Findings were robust to a range of probabilistic and  
4  
5 348 one-way sensitivity analyses.  
6  
7  
8 349  
9  
10 350 Our study findings supported that nutrition policies can have meaningful health and economic  
11  
12 351 impacts on cancer prevention in the US. In this case, a modest change in mean calorie  
13  
14 352 consumption, distributed across the population, was estimated to achieve important reductions in  
15  
16 353 obesity-related cancer burdens among US adults. Using the best available estimates, our study  
17  
18 354 further suggested that the federal menu calorie labeling policy is cost-effective in the short term  
19  
20 355 and cost-saving in the long term in reducing obesity-associated cancer burdens. Many preventive  
21  
22 356 medical screenings are cost-effective, but none of them achieve net savings. For example, among  
23  
24 357 a large cohort of women born in the 1960s over a lifetime, mammography screening starting at  
25  
26 358 age 45 years was estimated to have an ICER of \$40 135/QALY.<sup>51</sup> Colonoscopy screening  
27  
28 359 starting at age 45 years among U.S. adults achieved an ICER of \$33 900/QALY.<sup>52</sup> Prostate-  
29  
30 360 specific antigen screening had an ICER of \$70 831 to \$136 332/QALY among U.S. males  
31  
32 361 beginning at 40 years of age over a lifetime.<sup>53</sup> In contrast, population-based nutrition  
33  
34 362 interventions could be a cost-saving strategy for cancer prevention. Cost-effectiveness analyses  
35  
36 363 showed that a penny-per-ounce tax on sugar-sweetened beverages would be a highly cost-  
37  
38 364 effective strategy for cancer prevention among US adults, with an ICER of 13 220, the nutrition  
39  
40 365 facts added sugar labeling would prevent 30 000 incident obesity-related cancer cases and 17 100  
41  
42 366 cancer deaths and be associated with a net saving of 704 million, and processed meat taxes  
43  
44 367 would avert 77 000 colorectal cancer cases and 12 500 stomach cancer cases save 4.5 billion, all  
45  
46 368 from the societal perspective.<sup>24 54 55</sup> Thus, while we shall continue the efforts of increasing the  
47  
48  
49  
50  
51  
52  
53  
54  
55  
56  
57  
58  
59  
60



1  
2  
3 369 screening rates, we also need to consider population-based strategies to improve nutrition for  
4  
5 370 cancer prevention in the US.  
6  
7

8 371  
9  
10 372 Our findings also indicated the importance of assessing potential industry response, which could  
11  
12 373 nearly double health and economic benefits. The additional impacts of industry reformulation in  
13  
14 374 response to nutrition-related policies have been reported in other studies focused on obesity-  
15  
16 375 associated cancer, diabetes, and cardiovascular diseases.<sup>23 55-57</sup> Our new findings build on this  
17  
18 376 recent work and highlight the importance of potential strategies to encourage industry  
19  
20 377 reformulation under the federal menu calorie labeling framework to further improve the health  
21  
22 378 benefits and cost-effectiveness of such policies.  
23  
24  
25

26 379  
27  
28 380 In addition, our results showed that population-based nutrition policies such as menu calorie  
29  
30 381 labeling can potentially narrow diet-associated cancer disparities. We found greater health gains  
31  
32 382 and economic impacts among racial/ethnic minorities compared to non-Hispanic whites, likely  
33  
34 383 due to higher diet-associated cancer burdens among minorities.<sup>58</sup> However, labeling policies may  
35  
36 384 have fewer effects on food purchasing behaviors among minorities or socioeconomically  
37  
38 385 disadvantaged groups. Prior studies reported that individuals with higher education and income  
39  
40 386 attainment were more likely to notice and use the menu calorie labels when ordering foods in  
41  
42 387 fast-food or full-service restaurants compared to socioeconomically disadvantaged groups,<sup>59-61</sup>  
43  
44 388 and multi-racial individuals were less likely to notice and use menu calorie labels in fast food  
45  
46 389 restaurants than non-Hispanic whites.<sup>59</sup> Previous studies also showed that literacy or numeracy  
47  
48 390 could be a barrier to label use.<sup>62 63</sup> Thus, it is important for labeling policies to be paired with  
49  
50 391 nutrition education to effectively reduce diet-associated health disparities.  
51  
52  
53  
54  
55  
56  
57  
58  
59  
60

1  
2  
3 392  
4  
5 393 Potential limitations should be considered. First, as a modeling study, our investigation does not  
6  
7  
8 394 provide the impact of real-world policy implementation on the health and economic outcomes of  
9  
10 395 federal menu calorie labeling. However, conducting randomized controlled trials of national  
11  
12 396 nutrition policy interventions is extremely difficult and often implausible while simulation  
13  
14 397 modeling can provide complementary evidence with the flexibility to assess different policy  
15  
16 398 scenarios that help inform policymaking. Second, this evaluation did not include the potential  
17  
18 399 benefits of menu calorie labeling on other health outcomes such as diabetes and cardiovascular  
19  
20 400 diseases. Considering such outcomes is likely to be associated with greater health gains and cost  
21  
22 401 savings.<sup>23 64 65</sup> Third, menu calorie labeling could have a greater effect among subgroups with  
23  
24 402 higher levels of income and education and non-Hispanic white adults<sup>59-61</sup> and thus exacerbating  
25  
26 403 health disparities. Due to the lack of consistent policy effect sizes among populations with  
27  
28 404 different socioeconomic statuses, we were unable to integrate this into our modeling. Forth, we  
29  
30 405 only modeled the impact of menu calorie labeling on calories although the policy may also result  
31  
32 406 in potential changes in the nutritional quality of the restaurant meals. The majority of current  
33  
34 407 restaurant meals consumed by American adults – 70% of meals consumed from fast-food  
35  
36 408 restaurants and 50% consumed from full-service restaurants – are of poor nutritional quality, and  
37  
38 409 the remainder is only of intermediate nutritional quality, with very few being ideal.<sup>10</sup> If the  
39  
40 410 policy also improves the quality of restaurant meals, the total reduction in obesity-associated  
41  
42 411 cancer burdens could be greater than our current estimates.  
43  
44  
45  
46  
47  
48  
49  
50

51 413 **CONCLUSIONS**  
52  
53  
54  
55  
56  
57  
58  
59  
60

1  
2  
3 414 Study findings suggest that menu calorie labeling is associated with lower obesity-related cancer  
4  
5 415 rates and reduced costs. Policymakers may prioritize nutrition policies for cancer prevention in  
6  
7 416 the US.  
8  
9  
10  
11  
12  
13  
14  
15  
16  
17  
18  
19  
20  
21  
22  
23  
24  
25  
26  
27  
28  
29  
30  
31  
32  
33  
34  
35  
36  
37  
38  
39  
40  
41  
42  
43  
44  
45  
46  
47  
48  
49  
50  
51  
52  
53  
54  
55  
56  
57  
58  
59  
60

For peer review only

1  
2  
3 **Ethics approval:** This study used de-identified datasets and was exempt from institutional  
4 review board review.  
5

6  
7 **Data sharing:** Data described in the manuscript, codebook, and analytic code will be made  
8 available upon request.  
9

10  
11 **Transparency Statement:** The author affirms that this manuscript is an honest, accurate, and  
12 transparent account of the study being reported; that no important aspects of the study have been  
13 omitted; and that any discrepancies from the study as planned have been explained.  
14

15  
16 **Dissemination Declaration:** Dissemination to the simulated population is not applicable.  
17

18  
19 **Contributors:** MD contributed to the data curation, formal analysis, visualization, original draft  
20 preparation, review and editing; CFG contributed to the data curation, review and editing; FFC,  
21 HE and DDK contributed to software; JBW, PW, DDK, DSM, YCW, and DM contributed to the  
22 review and editing; FFZ contributed the conceptualization, methodology, review and editing,  
23 supervision, and funding acquisition. All authors approved the final version. FFZ acts as the  
24 guarantor of the study.  
25

26  
27 **Role of the funding source:** This study was supported by NIH/NIMHD 1R01MD011501. The  
28 funding sources had no role in the design or conduct of the study; collection, management,  
29 analysis, or interpretation of the data; preparation, review, or approval of the manuscript; or  
30 decision to submit the manuscript for publication.  
31

32  
33 **Competing interests:** All authors have completed the ICMJE uniform disclosure form at  
34 [www.icmje.org/coi\\_disclosure.pdf](http://www.icmje.org/coi_disclosure.pdf) and declare: no support from any organization for the  
35 submitted work. JBW reports leadership or fiduciary role in the US Preventive Services Task  
36 Force. DK reports research funding from the National Institutes of Health, Arnold Ventures,  
37 Pharmaceutical Research and Manufacturers of America, Sarepta Therapeutics, and Janssen  
38  
39  
40  
41  
42  
43  
44  
45  
46  
47  
48  
49  
50  
51  
52  
53  
54  
55  
56  
57  
58  
59  
60

1  
2  
3 Therapeutics; consulting fees from Panalgo and the American College of Physicians. DM reports  
4  
5 research funding from the National Institutes of Health, Gates Foundation, Rockefeller  
6  
7 Foundation, and Vail Institute for Global Research; consulting fees from Acasti Pharma, Barilla,  
8  
9 Danone, and Motif FoodWorks; participating on scientific advisory boards of start-up companies  
10  
11 focused on innovations for health including Beren Therapeutics Brightseed, Calibrate, DayTwo,  
12  
13 Elysium Health, Filtricine, Foodome, HumanCo, January Inc., Perfect Day, Season, and Tiny  
14  
15 Organics; and chapter royalties from UpToDate. All of the above is outside the submitted work.  
16  
17  
18  
19 No other relationships or activities could appear to have influenced the submitted work.  
20  
21  
22  
23  
24  
25  
26  
27  
28  
29  
30  
31  
32  
33  
34  
35  
36  
37  
38  
39  
40  
41  
42  
43  
44  
45  
46  
47  
48  
49  
50  
51  
52  
53  
54  
55  
56  
57  
58  
59  
60

## REFERENCES

1. Lauby-Secretan B, Scoccianti C, Loomis D, et al. Body Fatness and Cancer--Viewpoint of the IARC Working Group. *The New England journal of medicine* 2016;375(8):794-8. doi: 10.1056/NEJMsr1606602 [published Online First: 2016/08/25]
2. World Cancer Research Fund/American Institute for Cancer Research. Continuous Update Project Expert Report 2018. Body fatness and weight gain and the risk of cancer, 2018.
3. Steele CB, Thomas CC, Henley SJ, et al. Vital Signs: Trends in Incidence of Cancers Associated with Overweight and Obesity - United States, 2005-2014. *MMWR Morbidity and mortality weekly report* 2017;66(39):1052-58. doi: 10.15585/mmwr.mm6639e1 [published Online First: 2017/10/06]
4. Fryar CD, Carroll MD, Ogden CL. Prevalence of overweight, obesity, and severe obesity among children and adolescents aged 2–19 years: United States, 1963–1965 through 2015–2016. 2018
5. Hales CM, Fryar CD, Carroll MD, et al. Trends in obesity and severe obesity prevalence in US youth and adults by sex and age, 2007-2008 to 2015-2016. *Jama* 2018;319(16):1723-25.
6. Centers for Disease Control and Prevention NcfcDPaHP. Health and Economic Cost of Chronic Diseases 2019 [Available from: <https://www.cdc.gov/chronicdisease/about/costs/index.htm> accessed January 26 2020.
7. Hong YR, Huo J, Desai R, et al. Excess Costs and Economic Burden of Obesity-Related Cancers in the United States. *Value in health : the journal of the International Society for Pharmacoeconomics and Outcomes Research* 2019;22(12):1378-86. doi: 10.1016/j.jval.2019.07.004 [published Online First: 2019/12/07]
8. Koroukian SM, Dong W, Berger NA. Changes in Age Distribution of Obesity-Associated Cancers. *JAMA Netw Open* 2019;2(8):e199261. doi: 10.1001/jamanetworkopen.2019.9261 [published Online First: 2019/08/15]
9. Rock CL, Thomson C, Gansler T, et al. American Cancer Society guideline for diet and physical activity for cancer prevention. *CA Cancer J Clin* 2020;70(4):245-71. doi: 10.3322/caac.21591 [published Online First: 2020/06/10]
10. Liu J, Rehm CD, Micha R, et al. Quality of Meals Consumed by US Adults at Full-Service and Fast-Food Restaurants, 2003-2016: Persistent Low Quality and Widening Disparities. *J Nutr* 2020:nxz299. doi: 10.1093/jn/nxz299
11. Roberts SB, Das SK, Suen VMM, et al. Measured energy content of frequently purchased restaurant meals: multi-country cross sectional study. *BMJ (Clinical research ed)* 2018;363:k4864. doi: 10.1136/bmj.k4864 [published Online First: 2018/12/14]
12. Wolfson JA, Bleich SN. Is cooking at home associated with better diet quality or weight-loss intention? *Public Health Nutr* 2015;18(8):1397-406. doi: 10.1017/s1368980014001943 [published Online First: 2014/11/17]
13. Food and Drug Administration. Food Labeling; Nutrition Labeling of Standard Menu Items in Restaurants and Similar Retail Food Establishments; Calorie Labeling of Articles of Food in Vending Machines; Final Rule In: Department of Health and Human Services, ed., 2014.
14. Petimar J, Zhang F, Cleveland LP, et al. Estimating the effect of calorie menu labeling on calories purchased in a large restaurant franchise in the southern United States: quasi-experimental study. *BMJ (Clinical research ed)* 2019;367:15837-137. doi: 10.1136/bmj.15837

15. Shangguan S, Afshin A, Shulkin M, et al. A Meta-Analysis of Food Labeling Effects on Consumer Diet Behaviors and Industry Practices. *American journal of preventive medicine* 2019;56(2):300-14. doi: 10.1016/j.amepre.2018.09.024 [published Online First: 2018/12/24]
16. Block JP, Roberto CA. Potential benefits of calorie labeling in restaurants. *Jama* 2014;312(9):887-88. doi: 10.1001/jama.2014.9239
17. Namba A, Auchincloss A, Leonberg BL, et al. Exploratory analysis of fast-food chain restaurant menus before and after implementation of local calorie-labeling policies, 2005-2011. *Preventing chronic disease* 2013;10:E101-E01. doi: 10.5888/pcd10.120224
18. Bleich SN, Wolfson JA, Jarlenski MP. Calorie changes in large chain restaurants from 2008 to 2015. *Preventive medicine* 2017;100:112-16. doi: 10.1016/j.ypmed.2017.04.004 [published Online First: 2017/04/09]
19. Bleich SN, Moran AJ, Jarlenski MP, et al. Higher-Calorie Menu Items Eliminated in Large Chain Restaurants. *American journal of preventive medicine* 2018;54(2):214-20. doi: 10.1016/j.amepre.2017.11.004 [published Online First: 2017/12/16]
20. Bleich SN, Wolfson JA, Jarlenski MP. Calorie Changes in Large Chain Restaurants: Declines in New Menu Items but Room for Improvement. *American journal of preventive medicine* 2016;50(1):e1-e8. doi: 10.1016/j.amepre.2015.05.007 [published Online First: 2015/07/07]
21. Bleich SN, Wolfson JA, Jarlenski MP, et al. Restaurants With Calories Displayed On Menus Had Lower Calorie Counts Compared To Restaurants Without Such Labels. *Health affairs (Project Hope)* 2015;34(11):1877-84. doi: 10.1377/hlthaff.2015.0512
22. Ananthapavan J, Sacks G, Brown V, et al. Priority-setting for obesity prevention-The Assessing Cost-Effectiveness of obesity prevention policies in Australia (ACE-Obesity Policy) study. *PloS one* 2020;15(6):e0234804. doi: 10.1371/journal.pone.0234804 [published Online First: 2020/06/20]
23. Liu J, Mozaffarian D, Sy S, et al. Health and Economic Impacts of the National Menu Calorie Labeling Law in the United States: A Microsimulation Study. *Circ Cardiovasc Qual Outcomes* 2020;13(6):e006313. doi: 10.1161/circoutcomes.119.006313 [published Online First: 2020/06/05]
24. Kim DD, Wilde PE, Michaud DS, et al. Cost Effectiveness of Nutrition Policies on Processed Meat: Implications for Cancer Burden in the U.S. *American journal of preventive medicine* 2019 doi: 10.1016/j.amepre.2019.02.023 [published Online First: 2019/10/01]
25. Kim DD, Wilde PE, Michaud DS, et al. Cost Effectiveness of Nutrition Policies on Processed Meat: Implications for Cancer Burden in the U.S. *American Journal of Preventive Medicine*, 2019.
26. United States Census Bureau. 2017 National Population Projections Tables: Main Series [Available from: <https://www.census.gov/data/tables/2017/demo/popproj/2017-summary-tables.html> accessed July 3 2019.
27. Freedman LS, Midthune D, Carroll RJ, et al. Adjustments to improve the estimation of usual dietary intake distributions in the population. *J Nutr* 2004;134(7):1836-43. doi: 10.1093/jn/134.7.1836 [published Online First: 2004/07/01]
28. Herrick KA, Rossen LM, Parsons R, et al. Estimating Usual Dietary In take From National Health and Nutrition Examination Survey Data Using the National Cancer Institute Method. *Vital and health statistics Series 2, Data evaluation and methods research* 2018(178):1-63. [published Online First: 2018/05/19]

- 1
  - 2
  - 3
  - 4
  - 5
  - 6
  - 7
  - 8
  - 9
  - 10
  - 11
  - 12
  - 13
  - 14
  - 15
  - 16
  - 17
  - 18
  - 19
  - 20
  - 21
  - 22
  - 23
  - 24
  - 25
  - 26
  - 27
  - 28
  - 29
  - 30
  - 31
  - 32
  - 33
  - 34
  - 35
  - 36
  - 37
  - 38
  - 39
  - 40
  - 41
  - 42
  - 43
  - 44
  - 45
  - 46
  - 47
  - 48
  - 49
  - 50
  - 51
  - 52
  - 53
  - 54
  - 55
  - 56
  - 57
  - 58
  - 59
  - 60
29. Dodd KW, Guenther PM, Freedman LS, et al. Statistical methods for estimating usual intake of nutrients and foods: a review of the theory. *Journal of the American Dietetic Association* 2006;106(10):1640-50. doi: 10.1016/j.jada.2006.07.011 [published Online First: 2006/09/27]
30. Hall KD, Sacks G, Chandramohan D, et al. Quantification of the effect of energy imbalance on bodyweight. *Lancet (London, England)* 2011;378(9793):826-37. doi: 10.1016/s0140-6736(11)60812-x [published Online First: 2011/08/30]
31. Hall KD, Schoeller DA, Brown AW. Reducing Calories to Lose Weight. *Jama* 2018;319(22):2336-37. doi: 10.1001/jama.2018.4257 [published Online First: 2018/06/14]
32. Mozaffarian D, Hao T, Rimm EB, et al. Changes in diet and lifestyle and long-term weight gain in women and men. *The New England journal of medicine* 2011;364(25):2392-404. doi: 10.1056/NEJMoa1014296 [published Online First: 2011/06/24]
33. Micha R, Penalvo JL, Cudhea F, et al. Association Between Dietary Factors and Mortality From Heart Disease, Stroke, and Type 2 Diabetes in the United States. *Jama* 2017;317(9):912-24. doi: 10.1001/jama.2017.0947 [published Online First: 2017/03/08]
34. Mariotto AB, Yabroff KR, Shao Y, et al. Projections of the cost of cancer care in the United States: 2010-2020. *Journal of the National Cancer Institute* 2011;103(2):117-28. doi: 10.1093/jnci/djq495 [published Online First: 2011/01/14]
35. United States Census Bureau. 2014 National Population Projections Tables [Available from: <https://www.census.gov/data/tables/2014/demo/popproj/2014-summary-tables.html> accessed July 3 2019.
36. Brenner H. Long-term survival rates of cancer patients achieved by the end of the 20th century: a period analysis. *Lancet (London, England)* 2002;360(9340):1131-5. doi: 10.1016/s0140-6736(02)11199-8 [published Online First: 2002/10/22]
37. Brenner H, Hakulinen T. Up-to-date and precise estimates of cancer patient survival: model-based period analysis. *American journal of epidemiology* 2006;164(7):689-96. doi: 10.1093/aje/kwj243 [published Online First: 2006/07/15]
38. Brenner H, Hakulinen T. Up-to-date cancer survival: period analysis and beyond. *International journal of cancer* 2009;124(6):1384-90. doi: 10.1002/ijc.24021 [published Online First: 2008/12/06]
39. Food and Drug Administration. Justification of Estimates for Appropriations Committees Fiscal Year 2012, 2012.
40. Food and Drug Administration. The Nutrition Review Project. Report to the Director, Center for Food Safety and Applied Nutrition, 2014.
41. Martin AB, Hartman M, Washington B, et al. National Health Care Spending In 2017: Growth Slows To Post-Great Recession Rates; Share Of GDP Stabilizes. *Health affairs (Project Hope)* 2019;38(1):101377hlthaff201805085. doi: 10.1377/hlthaff.2018.05085 [published Online First: 2018/12/07]
42. French EB, McCauley J, Aragon M, et al. End-Of-Life Medical Spending In Last Twelve Months Of Life Is Lower Than Previously Reported. *Health affairs (Project Hope)* 2017;36(7):1211-17. doi: 10.1377/hlthaff.2017.0174 [published Online First: 2017/07/07]
43. Hogan C, Lunney J, Gabel J, et al. Medicare beneficiaries' costs of care in the last year of life. *Health affairs (Project Hope)* 2001;20(4):188-95. doi: 10.1377/hlthaff.20.4.188 [published Online First: 2001/07/21]



- 1  
2  
3  
4  
5  
6  
7  
8  
9  
10  
11  
12  
13  
14  
15  
16  
17  
18  
19  
20  
21  
22  
23  
24  
25  
26  
27  
28  
29  
30  
31  
32  
33  
34  
35  
36  
37  
38  
39  
40  
41  
42  
43  
44  
45  
46  
47  
48  
49  
50  
51  
52  
53  
54  
55  
56  
57  
58  
59  
60
44. Yabroff KR, Davis WW, Lamont EB, et al. Patient time costs associated with cancer care. *Journal of the National Cancer Institute* 2007;99(1):14-23. doi: 10.1093/jnci/djk001 [published Online First: 2007/01/05]
  45. Yabroff KR, Guy GP, Jr., Ekwueme DU, et al. Annual patient time costs associated with medical care among cancer survivors in the United States. *Medical care* 2014;52(7):594-601. doi: 10.1097/mlr.000000000000151 [published Online First: 2014/06/14]
  46. Zheng Z, Yabroff KR, Guy GP, Jr., et al. Annual Medical Expenditure and Productivity Loss Among Colorectal, Female Breast, and Prostate Cancer Survivors in the United States. *Journal of the National Cancer Institute* 2016;108(5) doi: 10.1093/jnci/djv382 [published Online First: 2015/12/26]
  47. Guy GP, Jr., Ekwueme DU, Yabroff KR, et al. Economic burden of cancer survivorship among adults in the United States. *Journal of clinical oncology : official journal of the American Society of Clinical Oncology* 2013;31(30):3749-57. doi: 10.1200/jco.2013.49.1241 [published Online First: 2013/09/18]
  48. Sanders GD, Neumann PJ, Basu A, et al. Recommendations for Conduct, Methodological Practices, and Reporting of Cost-effectiveness Analyses: Second Panel on Cost-Effectiveness in Health and Medicine. *Jama* 2016;316(10):1093-103. doi: 10.1001/jama.2016.12195 [published Online First: 2016/09/14]
  49. Neumann PJ, Cohen JT, Weinstein MC. Updating cost-effectiveness--the curious resilience of the \$50,000-per-QALY threshold. *The New England journal of medicine* 2014;371(9):796-7. doi: 10.1056/NEJMp1405158 [published Online First: 2014/08/28]
  50. Greenberg D, Earle C, Fang CH, et al. When is cancer care cost-effective? A systematic overview of cost-utility analyses in oncology. *Journal of the National Cancer Institute* 2010;102(2):82-8. doi: 10.1093/jnci/djp472 [published Online First: 2010/01/09]
  51. Tina Shih YC, Dong W, Xu Y, et al. Assessing the Cost-Effectiveness of Updated Breast Cancer Screening Guidelines for Average-Risk Women. *Value in health : the journal of the International Society for Pharmacoeconomics and Outcomes Research* 2019;22(2):185-93. doi: 10.1016/j.jval.2018.07.880 [published Online First: 2019/02/04]
  52. Ladabaum U, Mannalithara A, Meester RGS, et al. Cost-Effectiveness and National Effects of Initiating Colorectal Cancer Screening for Average-Risk Persons at Age 45 Years Instead of 50 Years. *Gastroenterology* 2019;157(1):137-48. doi: 10.1053/j.gastro.2019.03.023 [published Online First: 2019/04/02]
  53. Roth JA, Gulati R, Gore JL, et al. Economic Analysis of Prostate-Specific Antigen Screening and Selective Treatment Strategies. *JAMA oncology* 2016;2(7):890-8. doi: 10.1001/jamaoncol.2015.6275 [published Online First: 2016/03/25]
  54. Du M, Griecci CF, Kim DD, et al. Cost-Effectiveness of a National Sugar-Sweetened Beverage Tax to Reduce Cancer Burden and Disparities in the United States. *JNCI Cancer Spectrum* 2020
  55. Du M, Griecci CF, Cudhea FF, et al. Cost-effectiveness Analysis of Nutrition Facts Added-Sugar Labeling and Obesity-Associated Cancer Rates in the US. *JAMA Network Open* 2021;4(4):e217501-e01. doi: 10.1001/jamanetworkopen.2021.7501
  56. Wilde P, Huang Y, Sy S, et al. Cost-Effectiveness of a US National Sugar-Sweetened Beverage Tax With a Multistakeholder Approach: Who Pays and Who Benefits. *Am J Public Health* 2019;109(2):276-84. doi: 10.2105/AJPH.2018.304803 [published Online First: 2018/12/20]

- 1  
2  
3 57. Huang Y, Kypridemos C, Liu J, et al. Cost-Effectiveness of the US Food and Drug  
4 Administration Added Sugar Labeling Policy for Improving Diet and Health. *Circulation*  
5 2019;139(23):2613-24. doi: 10.1161/CIRCULATIONAHA.118.036751 [published  
6 Online First: 2019/04/15]  
7  
8 58. Zhang FF, Cudhea F, Shan Z, et al. Preventable Cancer Burden Associated With Poor Diet in  
9 the United States. *JNCI Cancer Spectr* 2019;3(2):pkz034. doi: 10.1093/jncics/pkz034  
10 [published Online First: 2019/07/31]  
11  
12 59. Feng W, Fox A. Menu labels, for better, and worse? Exploring socio-economic and race-  
13 ethnic differences in menu label use in a national sample. *Appetite* 2018;128:223-32. doi:  
14 10.1016/j.appet.2018.06.015 [published Online First: 2018/06/13]  
15  
16 60. Green JE, Brown AG, Ohri-Vachaspati P. Sociodemographic disparities among fast-food  
17 restaurant customers who notice and use calorie menu labels. *Journal of the Academy of*  
18 *Nutrition and Dietetics* 2015;115(7):1093-101. doi: 10.1016/j.jand.2014.12.004  
19 [published Online First: 2015/02/11]  
20  
21 61. Lee-Kwan SH, Pan L, Maynard LM, et al. Factors Associated with Self-Reported Menu-  
22 Labeling Usage among US Adults. *Journal of the Academy of Nutrition and Dietetics*  
23 2016;116(7):1127-35. doi: 10.1016/j.jand.2015.12.015 [published Online First:  
24 2016/02/10]  
25  
26 62. Malloy-Weir L, Cooper M. Health literacy, literacy, numeracy and nutrition label  
27 understanding and use: a scoping review of the literature. *J Hum Nutr Diet*  
28 2017;30(3):309-25. doi: 10.1111/jhn.12428 [published Online First: 2016/10/13]  
29  
30 63. Nogueira LM, Thai CL, Nelson W, et al. Nutrition Label Numeracy: Disparities and  
31 Association with Health Behaviors. *American journal of health behavior* 2016;40(4):427-  
32 36. doi: 10.5993/ajhb.40.4.4 [published Online First: 2016/06/25]  
33  
34 64. Gortmaker SL, Wang YC, Long MW, et al. Three Interventions That Reduce Childhood  
35 Obesity Are Projected To Save More Than They Cost To Implement. *Health affairs*  
36 *(Project Hope)* 2015;34(11):1932-9. doi: 10.1377/hlthaff.2015.0631 [published Online  
37 First: 2015/11/04]  
38  
39 65. Kuo T, Jarosz CJ, Simon P, et al. Menu labeling as a potential strategy for combating the  
40 obesity epidemic: a health impact assessment. *Am J Public Health* 2009;99(9):1680-86.  
41 doi: 10.2105/AJPH.2008.153023 [published Online First: 2009/07/16]  
42  
43  
44  
45  
46  
47  
48  
49  
50  
51  
52  
53  
54  
55  
56  
57  
58  
59  
60

1  
2  
3 **Figure 1.** Estimated New Cancer Cases and Deaths Prevented by Federal Menu Calorie Labeling Policy  
4  
5 in the US by Cancer Type over a Lifetime  
6  
7

8  
9  
10 **Figure 2.** Probabilistic Sensitivity Analyses (PSA) for Cost-Effectiveness of the Federal Menu Calorie  
11  
12 Labeling Policy over 10 years and a Lifetime  
13

14 **Legend:** Values are presented in cost-effectiveness planes of net costs (\$millions) versus incremental  
15  
16 quality-adjusted life years (QALYs). For each policy scenario, each colored dot represents one of the  
17  
18 1000 simulations, with the largest dot showing the median incremental cost-effectiveness ratio (ICER,  
19  
20 \$/QALY); and the ellipse representing the 95% UIs. Results are presented from the societal perspective  
21  
22 and the healthcare perspective. Negative values indicate cost savings.  
23  
24  
25  
26  
27  
28  
29  
30  
31  
32  
33  
34  
35  
36  
37  
38  
39  
40  
41  
42  
43  
44  
45  
46  
47  
48  
49  
50  
51  
52  
53  
54  
55  
56  
57  
58  
59  
60

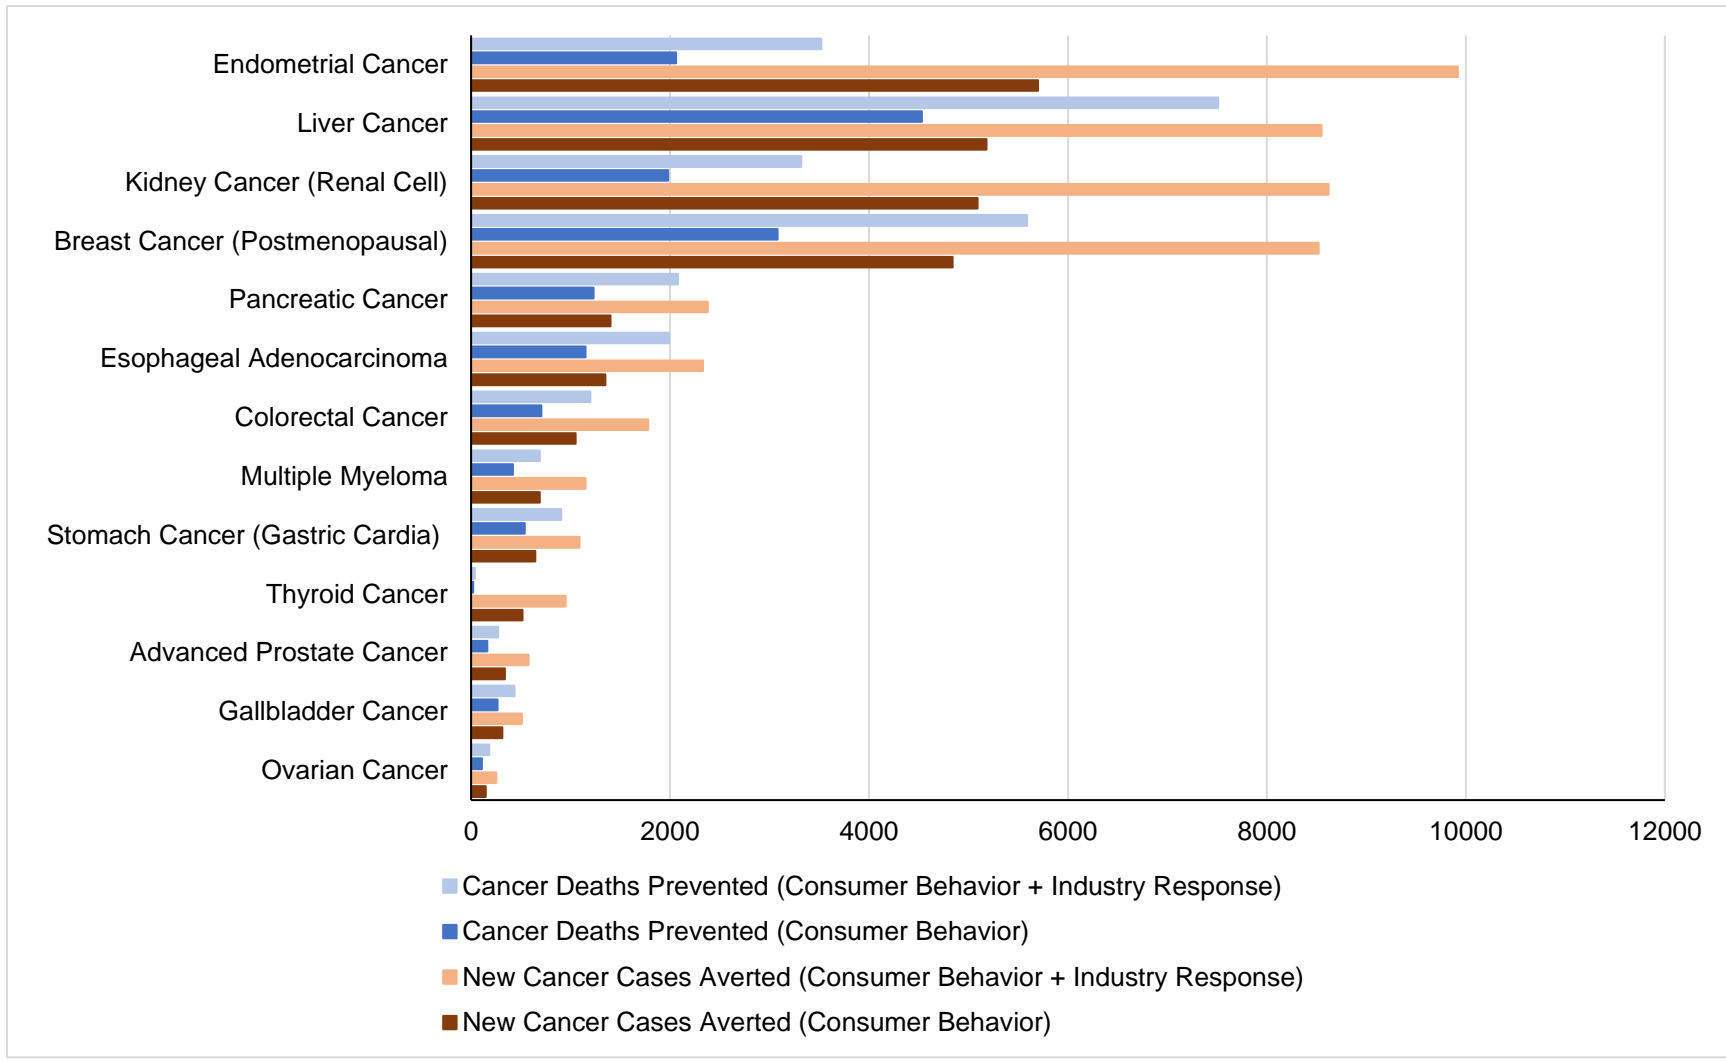

**Figure 1. Estimated New Cancer Cases and Deaths Prevented by Federal Menu Calorie Labeling Policy in the US by Cancer Type over a Lifetime**

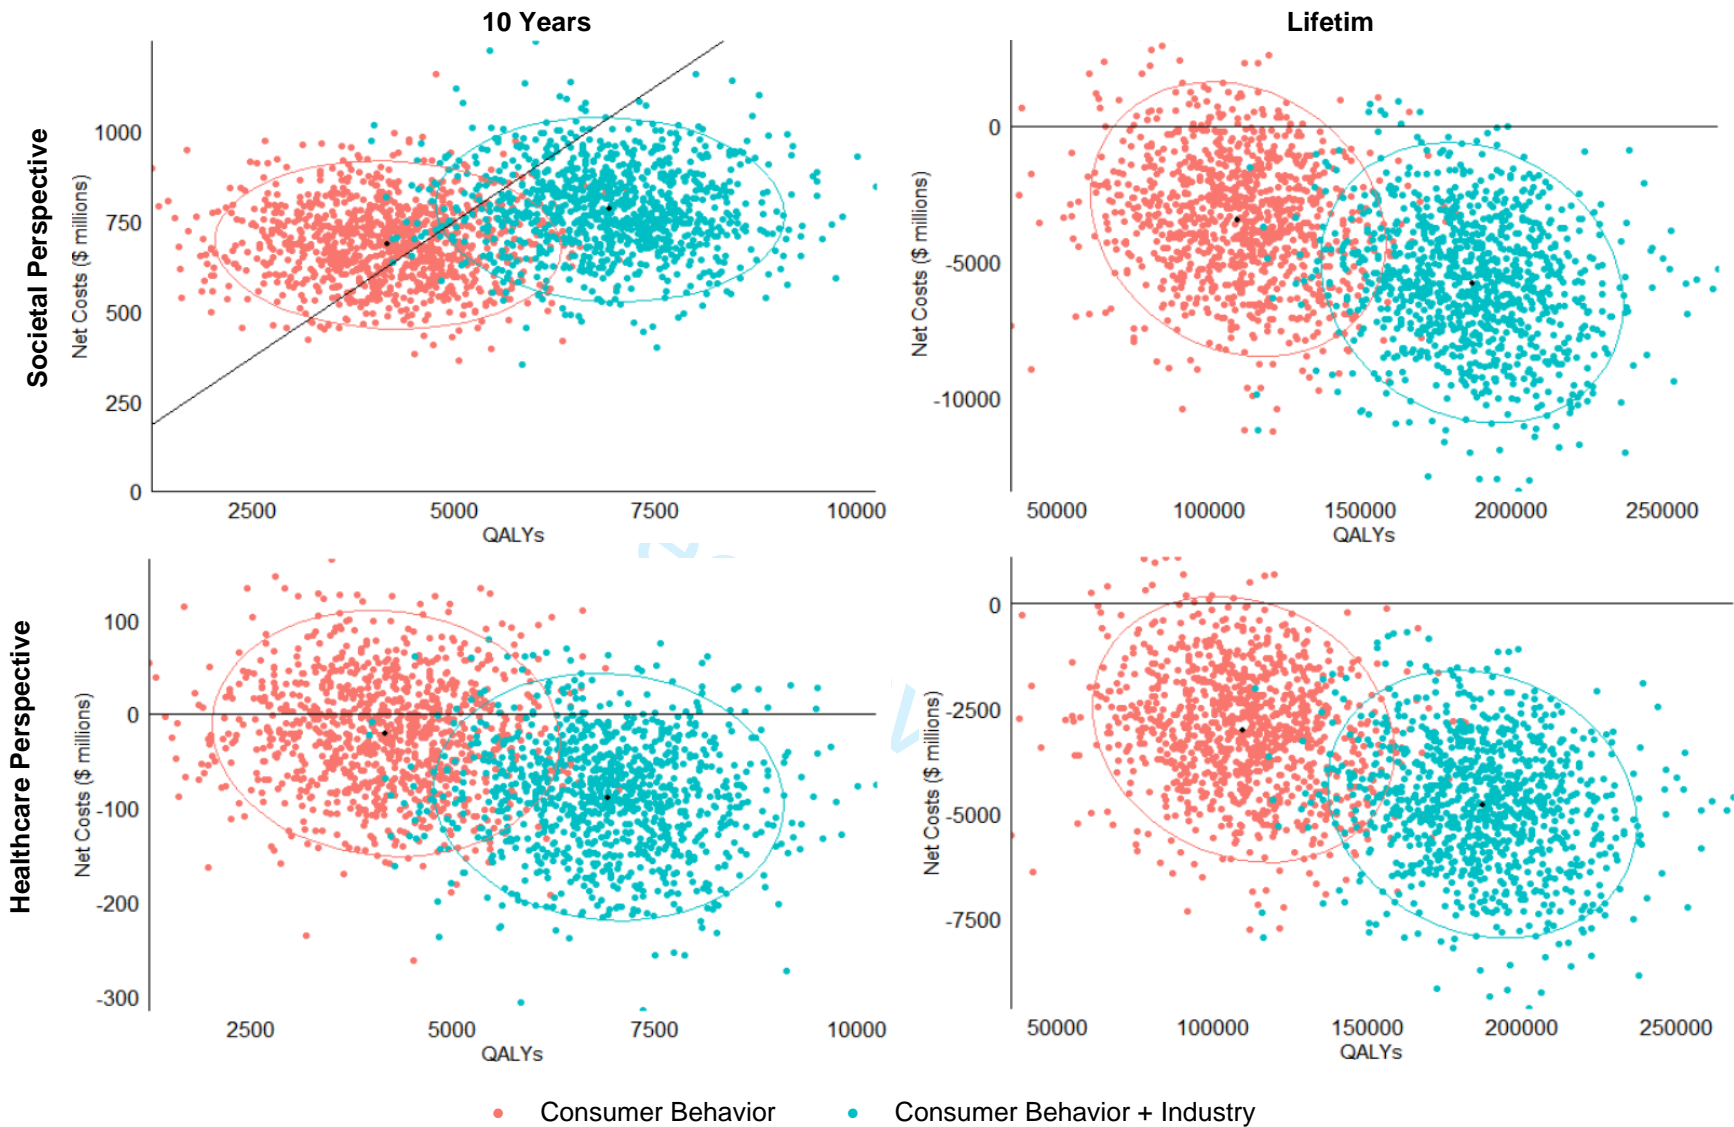

Values are presented in cost-effectiveness planes of net costs (\$millions) versus incremental quality-adjusted life years (QALYs). For each policy scenario, each colored dot represents one of the 1000 simulations, with the largest dot showing the median incremental cost-effectiveness ratio (ICER, \$/QALY); and the ellipse representing the 95% UIs. Results are presented from the societal perspective and the healthcare perspective. Negative values indicate cost savings.

**Figure 2. Probabilistic Sensitivity Analyses (PSA) for Cost-Effectiveness of the Federal Menu Calorie Labeling Policy over 10 years and a Lifetime**

1  
2  
3 **Title** Cost-Effectiveness Analysis of the Federal Menu Calorie Labeling and Obesity-Associated Cancer  
4 Burdens in the United States  
5

6  
7 **Appendix 1.** Estimate the Association Between Menu Calorie Labeling Policy and Calorie Intake from  
8 Restaurant Meals

9 **Appendix Table 1.** Policy impact of menu calorie labeling on consumer behaviors

10 **Appendix Table 2.** Policy impact of menu calorie labeling on restaurant industry response

11 **Appendix 2.** Baseline Cancer Incidence and Methods of Cancer Incidence Projections for 13 Types of  
12 Cancers  
13

14 **Appendix Table 3.** Estimating “crude” incidence after applying the cohort-period method

15 **Appendix 3.** Cancer Survival for 13 Types of Cancers

16 **Appendix Table 4.** Period Method for 5-Year Relative Survival for 2014

17 **Appendix 4.** Methods of Estimating the Health-Related Quality of Life Among 13 Types of Cancers

18 **Appendix 5.** Methods of Estimating Policy Implementation Costs

19 **Appendix Table 5.** Implementation Cost Estimates for the Federal Menu Calorie Labeling Policy (in  
20 2015 US Dollars)

21 **Appendix Table 6.** The Population Size of People Who are Alive Each Year Over a Lifetime (in  
22 millions)  
23

24 **Appendix 6.** Annual Health-Related Costs Among Cancer Patients and the General Population without  
25 Cancer  
26

27 **Appendix Table 7.** Description of Data Source of Health-Related Expenditures  
28  
29  
30  
31  
32  
33  
34  
35  
36  
37  
38  
39  
40  
41  
42  
43  
44  
45  
46  
47  
48  
49  
50  
51  
52  
53  
54  
55  
56  
57  
58  
59  
60

## Appendix 1. Estimate the association between menu calorie labeling policy and calorie intake from restaurant meals

To understand the effects of the federal menu calorie labeling policy, we performed a comprehensive literature search and reviewed the evidence on how the policy affected consumer behaviors and industry.

To estimate the policy effect on consumer behavior alone, we reviewed individual studies in both real-world and experimental settings as well as meta-analyses (**Appendix Table 1**). A meta-analysis of natural experimental studies showed that menu calorie labeling was associated with a 7.3% (95% CI: 4.4% to 10.1%) reduction in calories per meal consumed/purchased.<sup>1</sup> This effect estimate is corresponding to an average reduction of 23.5 kcal per meal consumed by NHANES participants from 56.5% of full-service restaurants<sup>2</sup> and all fast-food restaurants. This estimate was consistent with evidence from a previous meta-analysis and a recent real-world study.<sup>3,4</sup> A previous meta-analysis estimated that the menu calorie labeling would lead to about an 18 kcal reduction ordered per meal.<sup>3</sup> A recent longitudinal study used data from a large restaurant franchise in the southern U.S. and estimated that, after labeling implementation, a decrease of 60 kcal per transaction was observed in the first year, followed by an increasing trend of 0.71 kcal per transaction per week over two years.<sup>4</sup> These together attenuated the calorie reduction to 23 kcal per transaction by the end of the third year of the policy implementation.<sup>5</sup> Compared to other studies, the 7.3% calorie reduction per meal represents a more conservative estimate. It was reported in a cross-sectional study that customers at the labeled full-service restaurants purchased food with 151 fewer calories.<sup>6</sup> One meta-analysis of studies that evaluated energy ordered in a real-world setting showed that the calorie labeling policy would lead to a mean reduction of 77.8 in calories purchased per meal.<sup>7</sup> In a laboratory setting, there was a significant reduction of 115.3 kcal per meal ordered.<sup>8</sup> Integrating both the real-world and experimental studies, the policy was

1  
2  
3 estimated to generate a significant reduction of 100.3 in calories purchased.<sup>7</sup> Therefore, we decided to  
4 use a reduction of calorie intake per meal by 7.3% (95% CI: 4.4% to 10.1%) as the model input given it  
5 is the most updated and conservative estimate supported by existing evidence. This policy effect on  
6 consumer behavior alone was assumed to take effect during the first year of implementation and no  
7 further reduction thereafter.  
8  
9  
10  
11  
12  
13

14  
15 Based on the published literature, we estimated that there was a 5% reduction in calories  
16 consumed per meal from chain restaurants due to industry reformulation, the introduction of new low-  
17 calorie menu items, or the replacement of menu items high in calories with low-calorie menu options.<sup>9-  
18 13</sup> Bleich et al. estimated the calorie changes in chain restaurants' menu items using data from the largest  
19 chain restaurants in the U.S.<sup>9-13</sup> Using the estimated mean calorie per menu item from the two published  
20 studies shown in **Appendix Table 2**,<sup>11, 12</sup> we calculated the mean change in calories per menu item  
21 before and after the policy implementation. Given the national law was announced in 2010, using data  
22 from the trend analysis, we treated the mean calorie per menu item measured in 2008 as the baseline and  
23 found there was an 11% reduction in calories per menu item two years after the affordable care act was  
24 enacted. The change decreased to 7% in 2015, one year after the FDA announced the final rule for the  
25 industry to comply with. In the study evaluated the calorie content in current menu items, eliminated  
26 menu items, and newly introduced menu items, we estimated that there was a 1% reduction in mean per-  
27 item calories in 2013-2014 compared to that in 2012, and the reduction increased to 5% in 2015. Based  
28 on this de novo analysis, we chose a reduction in calories per meal consumed by 5% to represent a  
29 modest industry reformulation in response to the federal menu calorie labeling by chain restaurants. We  
30 assumed no industry response in the first year, then the reformulation activities would occur in the rest  
31 of the years over the model lifetime, resulting in a net reduction of 5% in calories consumed per meal.  
32  
33  
34  
35  
36  
37  
38  
39  
40  
41  
42  
43  
44  
45  
46  
47  
48  
49  
50  
51  
52  
53  
54  
55  
56  
57  
58  
59  
60



**Appendix Table 1.** Policy impact of menu calorie labeling on consumer behaviors

| Study                                                                                                                                                                                                  | Design                                                                                                                                                                                                               | Year, country                                                                                      | Estimate size mean (95% CI)                                                                                                                                                                                                              | Comment                                                                                                                                               |
|--------------------------------------------------------------------------------------------------------------------------------------------------------------------------------------------------------|----------------------------------------------------------------------------------------------------------------------------------------------------------------------------------------------------------------------|----------------------------------------------------------------------------------------------------|------------------------------------------------------------------------------------------------------------------------------------------------------------------------------------------------------------------------------------------|-------------------------------------------------------------------------------------------------------------------------------------------------------|
| Shangguan et. al., 2019 <sup>1</sup><br><br>A Meta-Analysis of Food Labeling Effects on Consumer Diet Behaviors and Industry Practices                                                                 | Meta-analysis<br><br>13 studies (5 RCTs) with 19 interventions on changes in calorie intake per meal, among children and adults                                                                                      | 2000 to 2015, US, Canada, UK, Sweden                                                               | -7.3% (-10.1%, -4.4%) in calorie intake per meal                                                                                                                                                                                         | Corresponds to a 23.5 kcal per meal consumed by NHANES participants from 56.5% of full-service restaurants <sup>2</sup> and all fast-food restaurants |
| Petimar et. al., 2019 <sup>4</sup><br><br>Estimating the effect of calorie menu labeling on calories purchased in a large restaurant franchise in the southern United States: quasi-experimental study | Quasi-experimental longitudinal study<br><br>Transaction data from 104 restaurants of a national fast food company with three different restaurant chains located in the Louisiana, Texas, and Mississippi in the US | 2015 to 2018 (pre-labeling: April 2015 to April 2017; post-labeling: April 2017 to April 2018), US | -60 (-48, -72) kcal in calorie purchased per transaction, followed by a post-implementation increasing trend of 0.71 kcal per transaction per week                                                                                       | Because of the post-implementation increase, the estimated reduction in calorie per transaction was 23 kcal lower than the counterfactual.            |
| Cantu-Jungles et. al., 2017 <sup>8</sup><br><br>A Meta-Analysis to Determine the Impact of Restaurant Menu Labeling on Calories and Nutrients (Ordered or Consumed) in U.S. Adults                     | Meta-analysis<br><br>14 studies that evaluated menu calorie labeling on changes in calorie chosen in laboratory and away-from-home settings, among children and adults                                               | 1996 to 2014                                                                                       | -115.2 (-130.87, -99.5) kcal in calorie ordered or consumed per meal in laboratory setting                                                                                                                                               | N/A                                                                                                                                                   |
| Littlewood et. al., 2016 <sup>7</sup><br><br>Menu labelling is effective in reducing energy ordered and consumed: a systematic review and meta-analysis of recent studies                              | Systematic review and meta-analysis<br><br>12 studies (6 RCTs) on changes in calorie consumed, ordered, or selected in both real-world and experimental settings, among children and adults                          | 2011 to 2014, US, Canada, Australia,                                                               | -100.3 (-146.6, -54.0) kcal in calorie consumed in both settings per meal or transaction (3 studies)<br><br>-77.8 (-121.6, -34.1) kcal in calorie purchased per meal or transaction in real-world setting (5 studies)                    | N/A                                                                                                                                                   |
| Long et. al., 2015 <sup>3</sup><br><br>Systematic Review and Meta-analysis of the Impact of Restaurant Menu Calorie Labeling                                                                           | Systematic review and meta-analysis<br><br>19 studies (11 RCTs, 8 natural experiments) on changes in calorie purchased per meal or per transaction, among children and adults                                        | 2008 to 2013, US                                                                                   | -18.1 (-33.6, -2.70) kcal in calorie purchased per meal or per transaction<br><br>When stratifying by restaurant and non-restaurant settings (RCTs), the changes were -6.7 (-20.21, 6.81) kcal and -58.2 (-102.4, -13.9) kcal in calorie | N/A                                                                                                                                                   |

|                                        |                                                                                                                                                                                                          |          |                                                                                    |                                                                                         |
|----------------------------------------|----------------------------------------------------------------------------------------------------------------------------------------------------------------------------------------------------------|----------|------------------------------------------------------------------------------------|-----------------------------------------------------------------------------------------|
|                                        |                                                                                                                                                                                                          |          | purchased per meal or per transaction                                              |                                                                                         |
| Auchincloss et. al., 2013 <sup>6</sup> | Cross-sectional study<br>648 customer surveys and transaction receipts at 7 restaurant outlets of 1 large full-service restaurant chain (2 outlets with menu calorie labels and 5 without), among adults | 2011, US | -151 kcal (-270, -33) for foods purchased from full-service restaurants (per meal) | Was included in the meta-analysis conducted by Cantu-Jungles et. al., 2017 <sup>8</sup> |

**Appendix Table 2.** Policy impact of menu calorie labeling on restaurant industry response

| Study                                                           |                               | Year  |                               |                                   |        |                               |
|-----------------------------------------------------------------|-------------------------------|-------|-------------------------------|-----------------------------------|--------|-------------------------------|
|                                                                 |                               | 2008  | 2012                          | 2013                              | 2014   | 2015                          |
| Bleich et. al., 2017 <sup>11</sup>                              | # of menu items (n)           | 6,601 | 9,526                         | 10,278                            | 10,654 | 11,034                        |
| Calorie changes in large chain restaurants from 2008 to 2015    | mean per-item calories (kcal) | 368.0 | 329.1                         | 330.1                             | 337.2  | 340.6                         |
| 44 of the 100 largest chain restaurants                         |                               |       |                               |                                   |        |                               |
|                                                                 | diff. (%)                     |       | 2012 vs. 2008<br>-38.9 (-11%) |                                   |        | 2015 vs. 2008<br>-27 (-7%)    |
| Bleich et. al., 2018 <sup>12</sup>                              | # of menu items (n)           |       | 14,705                        | 17,219 (2013-2014)                |        | 13,920                        |
| Higher-Calorie Menu Items Eliminated in Large Chain Restaurants | mean per-item calories (kcal) |       | 374.4                         | 370.9                             |        | 357.4                         |
| 66 of the 100 largest chain restaurants                         |                               |       |                               |                                   |        |                               |
|                                                                 | diff. (%)                     |       |                               | 2013-2014 vs. 2012<br>-3.52 (-1%) |        | 2015 vs. 2012<br>-17.05 (-5%) |

## Appendix 2. Baseline cancer incidence and methods of cancer incidence projections for 13 types of cancers

We estimated the cancer incidence rate projections for the defined 32 demographic subgroups as inputs for the DiCOM model. We first obtained age-adjusted incidence rates from 2006 to 2015 from the United States Cancer Statistics combining data from the Surveillance, Epidemiology, and End Results (SEER) database and the Centers for Disease Control and Prevention's National Program of Cancer Registries (NPCR) database.<sup>14</sup>

Based on the trends from 2006 to 2015, we projected age-adjusted cancer incidence rates in the next 15 years from 2016 to 2030 using the average annual percent change (AAPC) method.<sup>15, 16</sup> Because longer-term projections may not be valid, we chose to hold age-adjusted cancer incidence rates constant from 2030 to 2095. Specifically, the annual percent change was calculated for each cancer site in each of the 32 subgroups by fitting a regression line to the natural logarithm of the age-adjusted rates (I) in the years 2006 through 2015 (y). The equation for AAPC:  $\ln(I) = \alpha + \beta y$ , where  $\alpha$  and  $\beta$  were coefficients to be estimated and y is the calendar year.<sup>15, 16</sup> We then combined the AAPC projected cancer incidence rates with the projected US population to account for the change in population age distribution over time. The projected US population in each of the 32 subgroups from 2016 to 2060 were extracted from the National Interim Projections of the US population.<sup>17</sup> Because projections were only available through 2060, further projections after 2060 were not considered. We further applied the cohort-period method to estimate cancer incidence in each of the 32 subgroups in the closed cohort of US adults from 2015 to 2095 as they age. Details were illustrated in **Appendix Table 3** using colon and rectum cancer incidence among non-Hispanic white females (NHWF) as an example.

Appendix Table 3. Estimating “crude” incidence after applying cohort-period method

| EXAMPLE: Colon and Rectum Cancer, Non-Hispanic White Females |                         |                 |                          |                                     |                        |                               |                          |                                     |                        |                               |                          |                                     |                        |                               |
|--------------------------------------------------------------|-------------------------|-----------------|--------------------------|-------------------------------------|------------------------|-------------------------------|--------------------------|-------------------------------------|------------------------|-------------------------------|--------------------------|-------------------------------------|------------------------|-------------------------------|
| Age                                                          | 2015                    |                 |                          | 2016                                |                        |                               | 2017                     |                                     |                        | 2018                          |                          |                                     |                        |                               |
|                                                              | Baseline Incidence Rate | Population Size | AAPC Predicted Incidence | US Census Predicted Population Size | Cancer Cases Predicted | Age Shifted “crude” Incidence | AAPC Predicted Incidence | US Census Predicted Population Size | Cancer Cases Predicted | Age Shifted “crude” Incidence | AAPC Predicted Incidence | US Census Predicted Population Size | Cancer Cases Predicted | Age Shifted “crude” Incidence |
| 20                                                           | 8.531                   | 30523184        | 8.694                    | 1134235                             |                        | 10.64                         | 8.859                    | 126079                              |                        | 11.694                        | 9.028                    | 117775                              |                        | 13.82                         |
| 21                                                           | 8.531                   |                 | 8.694                    | 156761                              | 100565                 |                               | 8.859                    | 197549                              |                        |                               | 9.028                    | 129379                              |                        |                               |
| 22                                                           | 8.531                   |                 | 8.694                    | 177144                              | 102337                 |                               | 8.859                    | 159788                              | 102748                 |                               | 9.028                    | 140620                              |                        |                               |
| 23                                                           | 8.531                   |                 | 8.694                    | 196469                              | 14017                  |                               | 8.859                    | 180122                              | 104550                 |                               | 9.028                    | 152784                              | 104976                 |                               |
| 24                                                           | 8.531                   |                 | 8.694                    | 239910                              | 107707                 |                               | 8.859                    | 199459                              | 106263                 |                               | 9.028                    | 183136                              | 106813                 |                               |
| 25                                                           | 8.531                   |                 | 8.694                    | 283513                              | 11685                  |                               | 8.859                    | 247139                              | 110009                 |                               | 9.028                    | 220329                              | 108546                 |                               |
| 26                                                           | 8.531                   |                 | 8.694                    | 294013                              | 12497                  |                               | 8.859                    | 286229                              | 113950                 |                               | 9.028                    | 244499                              | 12353                  |                               |
| 27                                                           | 8.531                   |                 | 8.694                    | 250740                              | 108735                 |                               | 8.859                    | 296475                              | 114858                 |                               | 9.028                    | 288797                              | 16352                  |                               |
| 28                                                           | 8.531                   |                 | 8.694                    | 232421                              | 107143                 |                               | 8.859                    | 253062                              | 11012                  |                               | 9.028                    | 298770                              | 17252                  |                               |
| 29                                                           | 8.531                   |                 | 8.694                    | 216039                              | 105719                 |                               | 8.859                    | 234519                              | 109369                 |                               | 9.028                    | 255161                              | 113315                 |                               |
| 30                                                           | 8.531                   |                 | 8.694                    | 228929                              | 106839                 |                               | 8.859                    | 217844                              | 107892                 |                               | 9.028                    | 236330                              | 11615                  |                               |
| 31                                                           | 8.531                   |                 | 8.694                    | 244281                              | 108174                 |                               | 8.859                    | 230337                              | 108999                 |                               | 9.028                    | 21912                               | 10079                  |                               |
| 32                                                           | 8.531                   |                 | 8.694                    | 205955                              | 104842                 |                               | 8.859                    | 245249                              | 110320                 |                               | 9.028                    | 231390                              | 11169                  |                               |
| 33                                                           | 8.531                   |                 | 8.694                    | 226950                              | 106667                 |                               | 8.859                    | 206736                              | 106908                 |                               | 9.028                    | 246013                              | 12489                  |                               |
| 34                                                           | 8.531                   |                 | 8.694                    | 226234                              | 106605                 |                               | 8.859                    | 227540                              | 108751                 |                               | 9.028                    | 207377                              | 109001                 |                               |
| 35                                                           | 8.531                   |                 | 8.694                    | 217701                              | 105863                 |                               | 8.859                    | 226721                              | 108678                 |                               | 9.028                    | 228051                              | 10868                  |                               |
| 36                                                           | 8.531                   |                 | 8.694                    | 228467                              | 106799                 |                               | 8.859                    | 218111                              | 107918                 |                               | 9.028                    | 227199                              | 10791                  |                               |
| 37                                                           | 8.531                   |                 | 8.694                    | 180971                              | 100931                 |                               | 8.859                    | 228796                              | 108862                 |                               | 9.028                    | 218528                              | 10008                  |                               |
| 38                                                           | 8.531                   |                 | 8.694                    | 139547                              | 99069                  |                               | 8.859                    | 116267                              | 102879                 |                               | 9.028                    | 229044                              | 10958                  |                               |
| 39                                                           | 8.531                   |                 | 8.694                    | 127605                              | 98030                  |                               | 8.859                    | 139679                              | 100967                 |                               | 9.028                    | 161414                              | 104852                 |                               |
| 40                                                           | 8.531                   |                 | 8.694                    | 1088875                             | 94663                  |                               | 8.859                    | 127530                              | 99891                  |                               | 9.028                    | 139635                              | 102886                 |                               |
| 41                                                           | 8.531                   |                 | 8.694                    | 190467                              | 98279                  |                               | 8.859                    | 1088644                             | 96446                  |                               | 9.028                    | 127272                              | 101770                 |                               |
| 42                                                           | 8.531                   |                 | 8.694                    | 110345                              | 95747                  |                               | 8.859                    | 129951                              | 100105                 |                               | 9.028                    | 108229                              | 98245                  |                               |
| 43                                                           | 8.531                   |                 | 8.694                    | 130264                              | 98262                  |                               | 8.859                    | 110015                              | 97506                  |                               | 9.028                    | 129228                              | 101946                 |                               |
| 44                                                           | 8.531                   |                 | 8.694                    | 121011                              | 105229                 |                               | 8.859                    | 129268                              | 100045                 |                               | 9.028                    | 1099713                             | 99282                  |                               |
| 45                                                           | 41269                   | 14238423        | 41919                    | 139769                              | 553230                 | 43.775                        | 42.579                   | 108976                              | 54771                  | 45.825                        | 43.250                   | 128045                              | 487878                 | 47.459                        |
| 46                                                           | 41269                   |                 | 41919                    | 1346596                             | 564476                 |                               | 42.579                   | 137806                              | 56110                  |                               | 43.250                   | 207332                              | 522169                 |                               |
| 47                                                           | 41269                   |                 | 41919                    | 1292274                             | 547105                 |                               | 42.579                   | 1344191                             | 572344                 |                               | 43.250                   | 1315541                             | 568969                 |                               |
| 48                                                           | 41269                   |                 | 41919                    | 1264917                             | 530237                 |                               | 42.579                   | 1289694                             | 549140                 |                               | 43.250                   | 1341533                             | 580211                 |                               |
| 49                                                           | 41269                   |                 | 41919                    | 1295410                             | 543019                 |                               | 42.579                   | 1262140                             | 537408                 |                               | 43.250                   | 1286923                             | 556592                 |                               |
| 50                                                           | 41269                   |                 | 41919                    | 1325816                             | 555765                 |                               | 42.579                   | 1292230                             | 550220                 |                               | 43.250                   | 1259139                             | 544576                 |                               |
| 51                                                           | 41269                   |                 | 41919                    | 1432079                             | 600309                 |                               | 42.579                   | 1322198                             | 562980                 |                               | 43.250                   | 1288813                             | 557410                 |                               |
| 52                                                           | 41269                   |                 | 41919                    | 1489756                             | 624487                 |                               | 42.579                   | 1427705                             | 607904                 |                               | 43.250                   | 1318321                             | 570172                 |                               |
| 53                                                           | 41269                   |                 | 41919                    | 1510286                             | 633093                 |                               | 42.579                   | 1484805                             | 632216                 |                               | 43.250                   | 1423107                             | 615492                 |                               |
| 54                                                           | 41269                   |                 | 41919                    | 1532940                             | 642589                 |                               | 42.579                   | 1504858                             | 640755                 |                               | 43.250                   | 1499608                             | 639928                 |                               |
| 55                                                           | 59.736                  | 1511568         | 58.496                   | 1575080                             | 921363                 | 65.864                        | 57.283                   | 1526976                             | 874691                 | 71.135                        | 56.094                   | 146151                              | 840934                 | 75.804                        |
| 56                                                           | 59.736                  |                 | 58.496                   | 1579128                             | 923731                 |                               | 57.283                   | 1568482                             | 898466                 |                               | 56.094                   | 1520747                             | 853048                 |                               |
| 57                                                           | 59.736                  |                 | 58.496                   | 1554236                             | 909170                 |                               | 57.283                   | 1572018                             | 900492                 |                               | 56.094                   | 1561581                             | 875954                 |                               |
| 58                                                           | 59.736                  |                 | 58.496                   | 1566074                             | 916095                 |                               | 57.283                   | 1546788                             | 886040                 |                               | 56.094                   | 1564631                             | 877664                 |                               |
| 59                                                           | 59.736                  |                 | 58.496                   | 1559941                             | 912507                 |                               | 57.283                   | 1558015                             | 892471                 |                               | 56.094                   | 1539019                             | 863298                 |                               |
| 60                                                           | 59.736                  |                 | 58.496                   | 1509257                             | 882859                 |                               | 57.283                   | 1551289                             | 888618                 |                               | 56.094                   | 1549572                             | 869217                 |                               |
| 61                                                           | 59.736                  |                 | 58.496                   | 1507776                             | 881993                 |                               | 57.283                   | 1500225                             | 859367                 |                               | 56.094                   | 1542165                             | 865062                 |                               |
| 62                                                           | 59.736                  |                 | 58.496                   | 1469467                             | 859583                 |                               | 57.283                   | 1497943                             | 858060                 |                               | 56.094                   | 1490621                             | 836199                 |                               |
| 63                                                           | 59.736                  |                 | 58.496                   | 1428612                             | 835685                 |                               | 57.283                   | 1458963                             | 835731                 |                               | 56.094                   | 1487453                             | 834372                 |                               |
| 64                                                           | 59.736                  |                 | 58.496                   | 1384020                             | 809600                 |                               | 57.283                   | 1417465                             | 819601                 |                               | 56.094                   | 1447782                             | 812119                 |                               |
| 65                                                           | 147.246                 | 20639658        | 140.189                  | 1344027                             | 1884181                | 140.189                       | 133.471                  | 1372210                             | 1831501                | 133.471                       | 127.075                  | 1405568                             | 1786119                | 127.075                       |
| 66                                                           | 147.246                 |                 | 140.189                  | 1307657                             | 1833194                |                               | 133.471                  | 1331467                             | 1777121                |                               | 127.075                  | 1395984                             | 1727685                |                               |
| 67                                                           | 147.246                 |                 | 140.189                  | 1291598                             | 1810681                |                               | 133.471                  | 1294222                             | 1727410                |                               | 127.075                  | 1318007                             | 1674851                |                               |
| 68                                                           | 147.246                 |                 | 140.189                  | 1292613                             | 1812104                |                               | 133.471                  | 1277026                             | 1704458                |                               | 127.075                  | 1279194                             | 1626292                |                               |
| 69                                                           | 147.246                 |                 | 140.189                  | 1382868                             | 1938632                |                               | 133.471                  | 1276471                             | 1703717                |                               | 127.075                  | 1261379                             | 1602891                |                               |
| 70                                                           | 147.246                 |                 | 140.189                  | 1387587                             | 1944990                |                               | 133.471                  | 1363827                             | 1820312                |                               | 127.075                  | 1259177                             | 1600093                |                               |
| 71                                                           | 147.246                 |                 | 140.189                  | 1382267                             | 1877032                |                               | 133.471                  | 1372764                             | 1798357                |                               | 127.075                  | 1343441                             | 1707171                |                               |
| 72                                                           | 147.246                 |                 | 140.189                  | 1363496                             | 1834962                |                               | 133.471                  | 1366021                             | 1793357                |                               | 127.075                  | 1356905                             | 165982                 |                               |
| 73                                                           | 147.246                 |                 | 140.189                  | 132982                              | 1420091                |                               | 133.471                  | 1354967                             | 174603                 |                               | 127.075                  | 1348632                             | 1205469                |                               |
| 74                                                           | 147.246                 |                 | 140.189                  | 1274564                             | 1226044                |                               | 133.471                  | 1322594                             | 1724824                |                               | 127.075                  | 1336077                             | 1189515                |                               |
| 75                                                           | 147.246                 |                 | 140.189                  | 1296574                             | 1167111                |                               | 133.471                  | 1355200                             | 174443                 |                               | 127.075                  | 1307197                             | 1233635                |                               |
| 76                                                           | 147.246                 |                 | 140.189                  | 127848                              | 1048402                |                               | 133.471                  | 1377087                             | 1037185                |                               | 127.075                  | 1334495                             | 1060430                |                               |
| 77                                                           | 147.246                 |                 | 140.189                  | 106707                              | 990727                 |                               | 133.471                  | 1272604                             | 971140                 |                               | 127.075                  | 1256255                             | 961007                 |                               |
| 78                                                           | 147.246                 |                 | 140.189                  | 679404                              | 952451                 |                               | 133.471                  | 1358495                             | 914936                 |                               | 127.075                  | 1205976                             | 897115                 |                               |
| 79                                                           | 147.246                 |                 | 140.189                  | 625026                              | 876219                 |                               | 133.471                  | 1356756                             | 876578                 |                               | 127.075                  | 1262851                             | 842315                 |                               |
| 80                                                           | 147.246                 |                 | 140.189                  | 595777                              | 835215                 |                               | 133.471                  | 130790                              | 803215                 |                               | 127.075                  | 1232555                             | 803816                 |                               |
| 81                                                           | 147.246                 |                 | 140.189                  | 572977                              | 803252                 |                               | 133.471                  | 1371026                             | 762164                 |                               | 127.075                  | 1277004                             | 733225                 |                               |
| 82                                                           | 147.246                 |                 | 140.189                  | 512332                              | 718234                 |                               | 133.471                  | 1346330                             | 729192                 |                               | 127.075                  | 1244674                             | 692142                 |                               |
| 83                                                           | 147.246                 |                 | 140.189                  | 496976                              | 696707                 |                               | 133.471                  | 1348519                             | 648027                 |                               | 127.075                  | 1219986                             | 658228                 |                               |
| 84                                                           | 147.246                 |                 | 140.189                  | 475655                              | 666817                 |                               | 133.471                  | 1346792                             | 624233                 |                               | 127.075                  | 1215734                             | 580901                 |                               |
| 85                                                           | 147.246                 |                 | 140.189                  | 452173                              | 633898                 |                               | 133.471                  | 1344106                             | 592752                 |                               | 127.075                  | 1213698                             | 555186                 |                               |
| 86                                                           | 147.246                 |                 | 140.189                  | 428834                              | 601179                 |                               | 133.471                  | 1348526                             | 558610                 |                               | 127.075                  | 1211116                             | 522678                 |                               |
| 87                                                           | 147.246                 |                 | 140.189                  | 383933                              | 538233                 |                               | 133.471                  | 1393130                             | 524714                 |                               | 127.075                  | 1213961                             | 487917                 |                               |
| 88                                                           | 147.246                 |                 | 140.189                  | 356801                              | 500196                 |                               | 133.471                  | 1348261                             | 464827                 |                               | 127.075                  | 1215675                             | 453497                 |                               |
| 89                                                           | 147.246                 |                 | 140.189                  | 320644                              | 449508                 |                               | 133.471                  | 131862                              | 426923                 |                               | 127.075                  | 121475                              | 397076                 |                               |
| 90                                                           | 147.246                 |                 | 140.189                  | 278562                              | 390514                 |                               | 133.471                  | 1283710                             | 378670                 |                               | 127.075                  | 1213306                             | 360010                 |                               |
| 91                                                           | 147.246                 |                 | 140.189                  | 246568                              | 345662                 |                               | 133.471                  | 1242960                             | 324281                 |                               | 127.075                  | 1217721                             | 314790                 |                               |
| 92                                                           | 147.246                 |                 | 140.189                  | 209022                              | 293026                 |                               | 133.471                  | 121695                              | 282551                 |                               | 127.075                  | 1208339                             | 265381                 |                               |
| 93                                                           | 147.246                 |                 | 140.189                  | 198864                              | 238131                 |                               | 133.471                  | 1216399                             | 235441                 |                               | 127.075                  | 1218878                             | 227308                 |                               |
| 94                                                           | 147.246                 |                 | 140.189                  | 188657                              | 194382                 |                               | 133.471                  | 1210691                             | 187782                 |                               | 127.075                  | 1216633                             | 185927                 |                               |
| 95                                                           | 147.246                 |                 | 140.189                  | 109277                              | 153195                 |                               | 133.471                  | 121531                              | 150196                 |                               | 127.075                  | 1214362                             | 145325                 |                               |
| 96                                                           | 147.246                 |                 | 140.189                  | 80177                               | 121399                 |                               | 133.471                  | 1216769                             | 15811                  |                               | 127.075                  | 1218499                             | 11730                  |                               |
| 97                                                           | 147.246                 |                 | 140.189                  | 56739                               | 79542                  |                               | 133.471                  | 121702                              | 82982                  |                               | 127.075                  | 1216741                             | 85666                  |                               |
| 98                                                           | 147.246                 |                 | 140.189                  | 42046                               | 58944                  |                               | 133.471                  | 121907                              | 57268                  |                               | 127.075                  | 1217105                             | 59858                  |                               |
| 99                                                           | 147.246                 |                 | 140.189                  | 27405                               | 38419                  |                               | 133.471                  | 121959                              | 41321                  |                               | 127.075                  | 121659                              | 40231                  |                               |
| 100                                                          | 147.246                 |                 | 140.189                  | 49314                               | 69133                  |                               | 133.471                  | 121716                              | 67691                  |                               | 127.075                  | 121719                              | 66992                  |                               |

### Appendix 3. Cancer survival for 13 types of cancers

We estimated the 5-year relative survival for the defined 32 demographic subgroups. We obtained five-year relative survival rates using the period analysis method from the United States Cancer Statistics which incorporates data from the Surveillance, Epidemiology, and End Results (SEER) database.<sup>14</sup> The five-year survival for 2014, which was the most recently available data at the time of analysis, was used. These rates were extracted for each cancer type and by the defined 32 demographic subgroups for each cancer type. The rates are on a scale of 0-1.

Relative survival is a net survival measure representing cancer survival in the absence of other causes of death. Relative survival is defined as the ratio of the proportion of observed survivors in a cohort of cancer patients to the proportion of expected survivors in a comparable set of cancer-free individuals.<sup>18</sup> Relative survival is the preferred method to estimate survival from cancer registry data.

The period analysis is a method that enhances up-to-date monitoring of survival.<sup>19, 20</sup> In contrast to traditional cohort analysis of survival, period analysis derives long-term survival estimates exclusively from the survival experience of patients within some recent calendar period.<sup>19, 20</sup> Three-year intervals were chosen which results in the years 2008-2014 is used to calculate 5-year survival. Using seven years of data to calculate 5-year survival is the standard method used by SEER and used in SEER publications.<sup>21</sup>

The first interval contributed to the one-year survival and used cases diagnosed in 2012-2014, the second interval contributed to the two-year survival and used cases diagnosed in 2011-2013, the third interval contributed to the three-year survival and used cases diagnosed in 2010-2012, the fourth interval contributed to the four-year survival and used cases diagnosed in 2009-2011 and the fifth interval contributed to the five-year survival and used cases diagnosed in 2008-2010.

1  
2  
3 This analysis, therefore, used 2008-2014 diagnoses to calculate for 5-year relative survival for  
4  
5 2014. The highlighted orange boxes represent survival contributions for each year of diagnosis and year  
6  
7 of follow-up (**Appendix Table 4**). The annual probability of death was calculated as  $1 - \exp[\ln(5\text{-year}$   
8  
9 relative survival)/5].  
10  
11  
12  
13  
14  
15  
16  
17  
18  
19  
20  
21  
22  
23  
24  
25  
26  
27  
28  
29  
30  
31  
32  
33  
34  
35  
36  
37  
38  
39  
40  
41  
42  
43  
44  
45  
46  
47  
48  
49  
50  
51  
52  
53  
54  
55  
56  
57  
58  
59  
60

For peer review only

**Appendix Table 4.** Period method for 5-year relative survival for 2014

|   |      | YEARS OF DIAGNOSIS |      |      |      |      |      |      |      |      |      |      |      |      |      |
|---|------|--------------------|------|------|------|------|------|------|------|------|------|------|------|------|------|
|   | 2000 | 2001               | 2002 | 2003 | 2004 | 2005 | 2006 | 2007 | 2008 | 2009 | 2010 | 2011 | 2012 | 2013 | 2014 |
| 1 |      |                    |      |      |      |      |      |      |      |      |      |      |      |      |      |
| 2 |      |                    |      |      |      |      |      |      |      |      |      |      |      |      |      |
| 3 |      |                    |      |      |      |      |      |      |      |      |      |      |      |      |      |
| 4 |      |                    |      |      |      |      |      |      |      |      |      |      |      |      |      |
| 5 |      |                    |      |      |      |      |      |      |      |      |      |      |      |      |      |

For peer review only

#### Appendix 4. Methods of estimating the health-related quality of life among 13 types of cancers

Health utility values range from 0 (dead) to 1 (perfect health) and were assigned for each cancer type and by phase of care (initial, continuous, end of life), if available. We first searched databases for systematic reviews pertaining to utility weights or HRQOL measures for each cancer type of interest separately. We started with PubMed and searched Google Scholar if needed. The following search string was used for each cancer type : ("health related quality of life" OR "HRQOL" OR "quality of life" OR "QOL" OR "preference weight\*" OR "utility weight\*" OR "health state utilit\*" OR "health utility\*") AND ("cancer of interest") AND ("cancer" OR "neoplasm\*") AND ("review" OR "systematic review").

When an appropriate systematic review was identified, we read the articles included in the review and determined if the paper met the following data needs. Data Extraction Hierarchy: 1) cancer type specific to the type of interest; 2) consistent in the instrument used, prefer EQ-5D whenever available; 3) US samples preferred; 4) phase of care (assume same utility weights by phase if the phase of care data were not available). If no systematic reviews were available, we searched for individual studies about the utility weights of the cancer of interest. Additionally, check how often the paper is cited to see if it is a frequently used utility weight.



## Appendix 5. Methods of estimating policy implementation costs

We estimated the costs of implementing the federal menu calorie labeling for both government and industry, including government administration costs, monitoring and evaluation costs, industry compliance costs and reformulation costs, based on the FDA's budget report,<sup>22</sup> the Nutrition Review Project report,<sup>23</sup> and FDA's RIA<sup>24</sup> (**Appendix Table 5**).

It was estimated by FDA that approximately 298,600 establishments, organized under 2,130 chains were covered by the menu calorie labeling policy. Among the covered establishments, 115,000 (38.5%) were full-service restaurants and drinking places organized under 530 (24.9%) chains, and 116,200 (38.9%) were limited-service restaurants organized under 540 (25.4%) chains. In total, about 231,200 (77.4%) restaurants organized under 1,070 (50.2%) chains were covered by this policy.<sup>24</sup>

For industry compliance (#3) and reformulation costs (#4), the FDA estimated the costs by the type of establishments. Therefore, we only included the relevant costs incurred by restaurants as this approach generated more conservative estimates. In addition, the industry compliance costs consist of initial costs and recurring costs associated with new chains. In FDA's RIA, the initial costs were presented as a one-time cost, while the recurring costs associated with new chains were presented as annual costs and assumed to be incurred for 20 years starting from the 2nd year of policy implementation. According to FDA, 20 years is more appropriate for interventions that play out over long periods and whose effects deal with chronic conditions. Similarly, the reformulation costs (#4) estimated by FDA were presented as annual costs in FDA's RIA using the same assumption. We followed the same assumption and presented the annual compliance costs (#3) and annual reformulation costs (#4) incurred by restaurants in **Appendix Table 5**.

1  
2  
3 The cost of implementing the menu calorie labeling is fixed by the government. Uncertainty for  
4 the costs associated with government administration (#1) and government monitoring and evaluation (#  
5 2) was not provided in the source materials.<sup>22, 23</sup> We assumed that uncertainty is 20% around these costs.  
6  
7

8  
9  
10 For annual costs, namely the government monitoring and evaluation costs (#2) and the recurring  
11 costs in industry compliance (part of #3), and the reformulation costs (#4), we applied a 3% discounting  
12 rate recommended by the Second Panel on cost-effectiveness in health and medicine<sup>4</sup> to reflect the  
13 present value of future costs of government monitoring and evaluation, industry compliance and  
14 industry reformulation. The model is a closed cohort model, so we computed the discounted present  
15 value of per-person costs and total national costs for persons alive at implementation who remained  
16 alive in each subsequent year (not for the larger total US population in each year, which also has growth  
17 from immigration and new persons reaching the threshold age). The year-specific discounting factor is  
18 estimated by  $1/(1+3\%)^{(t-1)}$  (t is the number of years of policy intervention, t=1, 2, 3, ..., lifetime). As  
19 our model estimated the costs and health outcomes based on a closed cohort and the population size  
20 decline over time, we need to express the annual costs in proportion to the population at risk. The  
21 population at risk was estimated based on the proportion of death ( $P_{dt}$ , t=1, 2, 3, ...) in each year. We  
22 first obtained the proportion of people who are alive each year by calculating  $1-P_{dt}$  (t=1, 2, 3, ...). Then  
23 we multiplied the baseline population size of 235 million by the proportion of people who are alive each  
24 year (**Appendix Table 6**).  
25  
26  
27  
28  
29  
30  
31  
32  
33  
34  
35  
36  
37  
38  
39  
40  
41  
42  
43

44 We then estimated the per-person annual cost for cost categories #2, #3 (annual part), and #4, by  
45 dividing the annual cost estimated in the second year of implementing the policy among all US  
46 populations by the population size in the second year. Specifically, for government monitoring and  
47 evaluation, the per person annual cost is estimated  $\$503,648/233,719,989=\$0.00215$ , the per person  
48 annual cost for industry compliance recurring component is  $\$/233,719,989=\$$ , and that for reformulation  
49  
50  
51  
52  
53  
54  
55  
56  
57  
58  
59  
60

1  
2  
3 is \$662,800,000 /233,719,989=\$2.83587. Taken together, to estimate the discounted annual cost of #2,  
4  
5 #3 (annual part), and #4, we multiplied the population at risk, the per person annual cost estimated at  
6  
7 year-2, and the year-specific discounting factor, using: discounted annual cost = population at risk x per-  
8  
9 person annual cost x  $1/(1+3\%)^{(t-1)}$ .  
10  
11  
12  
13  
14  
15  
16  
17  
18  
19  
20  
21  
22  
23  
24  
25  
26  
27  
28  
29  
30  
31  
32  
33  
34  
35  
36  
37  
38  
39  
40  
41  
42  
43  
44  
45  
46  
47  
48  
49  
50  
51  
52  
53  
54  
55  
56  
57  
58  
59  
60

For peer review only

**Appendix Table 5.** Implementation cost estimates for the federal menu calorie labeling policy (in 2015 US dollars)

| Policy Effect                  | Cost Category                                        | One-time Cost*                                    | Annual Cost*                                                                                                   | Source                                        | Major Elements                                                                                                                                                                                                                                                                                                                                                                                                                                                                                                                                                                         |
|--------------------------------|------------------------------------------------------|---------------------------------------------------|----------------------------------------------------------------------------------------------------------------|-----------------------------------------------|----------------------------------------------------------------------------------------------------------------------------------------------------------------------------------------------------------------------------------------------------------------------------------------------------------------------------------------------------------------------------------------------------------------------------------------------------------------------------------------------------------------------------------------------------------------------------------------|
| Consumer behavior              | 1. Government administration <sup>#</sup>            | \$9,073,620<br>(\$7,258,896 to \$10,888,344)      | N/A                                                                                                            | FDA FY 2012 Budget Report <sup>22</sup>       | 1) Costs for outreach, education, review of regulatory issues, developing training for inspectors, etc.                                                                                                                                                                                                                                                                                                                                                                                                                                                                                |
|                                | 2. Government monitoring and evaluation <sup>#</sup> | N/A                                               | \$503,648<br>(\$402,918 to \$604,378)<br>(starting from 2 <sup>nd</sup> year and last for a lifetime)          | Nutrition Review Project report <sup>23</sup> | 1) Monitor industry compliance<br>2) Evaluate the accuracy, usefulness, and health impact of the policy intervention                                                                                                                                                                                                                                                                                                                                                                                                                                                                   |
|                                | 3. Industry compliance                               | \$276,632,470<br>(\$225,552,530 to \$327,205,740) | \$27,648,591<br>(\$16,756,003 to \$38,649,212)<br>(starting from 2 <sup>nd</sup> year and last for a lifetime) | FDA's RIA <sup>24</sup> Table 4-8             | 1) Collecting and managing records of nutritional analysis for each standard menu item (initial cost + recurring cost associated with new chains)<br>2) Revising or replacing existing menus, menu boards, and providing full written nutrition information (initial cost + recurring cost associated with new chains)<br>3) Training employees to understand the nutrition information to help ensure compliance with the final requirements (initial cost + recurring cost associated with new chains)<br>4) Legal review (initial cost + recurring cost associated with new chains) |
| Industry response <sup>^</sup> | 4. Industry reformulation                            | N/A                                               | \$15,059,100<br>(\$5,791,900 to \$24,124,700)<br>(starting from 2 <sup>nd</sup> year and last for a lifetime)  | FDA's RIA <sup>24</sup> Table 4-8             | 1) Annually recurring costs of nutrition analysis refer to the nutrition cost that will be incurred by the covered establishments due to the introduction of a new standard or reformulated standard menu items in their menus and the cost that will be incurred by new chains entering the industry<br>2) Annually recurring changes to menus or menu boards will be tied to new or reformulated standard menu items. In general, these future changes to menus will be incorporated into the natural menu                                                                           |

|  |  |  |  |  |                                                                                                                                                                                                                                                                                                                                                                          |
|--|--|--|--|--|--------------------------------------------------------------------------------------------------------------------------------------------------------------------------------------------------------------------------------------------------------------------------------------------------------------------------------------------------------------------------|
|  |  |  |  |  | <p>replacement cycle, so there will be no additional recurring menu update costs. However, all chain retail food establishments will need to provide additional written nutrition information for the reformulated or newly introduced menu items</p> <p>Average formula count, 6 new menu items, and 6 reformulated items per year<br/>FDA reformulation cost model</p> |
|--|--|--|--|--|--------------------------------------------------------------------------------------------------------------------------------------------------------------------------------------------------------------------------------------------------------------------------------------------------------------------------------------------------------------------------|

\*Policy intervention costs were inflated to 2015 US (December) dollars using the Consumer Price Index.

# Given no range of uncertainty was provided in source materials, we assumed 20% uncertainty around these costs.

^Some chains or establishments may respond to increased consumer interest in caloric content standard menu items by reformulating existing menu items or by introducing new, lower-calorie items. The change in manufacturing costs associated with reformulating these items has not been included in the cost estimation, the FDA includes the cost associated with analyzing the nutrition information of new or reformulated items.

Peer review only

1  
2  
3  
4  
5  
6  
7  
8  
9  
10  
11  
12  
13  
14  
15  
16  
17  
18  
19  
20  
21  
22  
23  
24  
25  
26  
27  
28  
29  
30  
31  
32  
33  
34  
35  
36  
37  
38  
39  
40  
41  
42  
43  
44  
45  
46  
47

1  
2  
3  
4  
5  
6  
7  
8  
9  
10  
11  
12  
13  
14  
15  
16  
17  
18  
19  
20  
21  
22  
23  
24  
25  
26  
27  
28  
29  
30  
31  
32  
33  
34  
35  
36  
37  
38  
39  
40  
41  
42  
43  
44  
45  
46  
47  
48  
49  
50  
51  
52  
53  
54  
55  
56  
57  
58  
59  
60

**Appendix Table 6.** The population size of people who are alive each year over a lifetime (in millions)

| Year | Population Size (Million) |
|------|---------------------------|
| 1    | 235.2                     |
| 2    | 233.7                     |
| 3    | 232.1                     |
| 4    | 230.4                     |
| 5    | 228.2                     |
| ⋮    | ⋮                         |
| 67   | 5.832                     |
| 68   | 4.348                     |
| 69   | 3.157                     |
| 70   | 2.233                     |

For peer review only

## Appendix 6. Annual health-related costs among cancer patients and the general population without cancer

The annual health-related costs data include: 1) medical expenditure, 2) productivity loss from missed workdays or disability, and 3) patient time cost associated with receiving care for cancer survivors by age (under 65 vs. above 65 years old) and phase of care (initial, continuing, end-year of life); 4) medical expenditure, 5) productivity loss, and 6) patient time cost for individuals without cancer by age and status of end year of life. The description of the data source and data structure were provided in **Appendix Table 7**.

We extracted the raw data for each of the costing components from the published literature.<sup>15, 25-29</sup> The overall assumptions for data extraction include: 1) health-related costs for breast cancer among postmenopausal females, advanced prostate cancer, esophageal adenocarcinoma, and stomach cardia cancer, by age, sex, and phase of cancer care, were the same as those for breast cancer, prostate cancer, esophagus cancer, and stomach cancer; 2) if no data available for a specific cancer type, we assumed the costs for that cancer type were the same as the estimates of costs for all-cancer sites, e.g., medical expenditure for all-cancer sites were used to replace the medical expenditures for multiple myeloma, gallbladder, liver, and thyroid cancers; 3) we extracted the costs for end-year of life due to cancer death and assumed that death due to other causes is not a competing outcome; 4) we assumed that the end-year life medical expenditure for individuals without cancer does not vary by the 32 subgroups.

If a specific costing component was not reported directly in the raw data, we calculated the cost for that component based on available data. For example, the annual productivity loss for colorectal cancer was reported as a percentage of total health-related costs.<sup>29</sup> We multiplied the percentage and the total health-related costs to obtain the productivity loss for colorectal cancer. We also performed data imputation for unavailable data. For instance, the annual productivity loss for all-cancer sites was

1  
2  
3 reported by time interval since cancer diagnosis (diagnosed within one year vs. diagnosed greater than  
4 one year).<sup>25</sup> To obtain this costing component by the defined phases of care, we calculated the weighted  
5 means which was used as the annual productivity loss for the continuous phase. We then assumed that  
6 the productivity loss in the initial phase and end-of-life phase of cancer care are 1.3 times and 4 times  
7 the mean estimates based on available data for other cancers.<sup>15, 25</sup> For individuals without cancer, we  
8 assumed that the end-of-life productivity loss is 4 times to the mean estimate of the productivity loss.  
9  
10 The same rules applied to data imputation for patient time costs.

11  
12 We then applied the age shifting to keep the expenditures consistent within each age group.  
13  
14 Starting from 2021, individuals in the cohort of 55-64 years old have turned into the cohort of 65 years  
15 and older. Therefore, we assumed that starting from 2021, the health-related expenditures for individuals  
16 who were in the cohort of 55-64 years old would be the same as those for individuals who were in the  
17 cohort of 65 years and older at the beginning of the DiCOM model. Based on the same assumption,  
18 starting from 2031 and 2047, the health-related expenditures for the cohort of 45-54 years old and those  
19 for the cohort of 20-44 years old were projected to be the same as those for the cohort of 65 years and  
20 older, respectively. We followed the same rule and applied the age shifting for the health-related  
21 expenditures for individuals without cancer. All estimations and projections were performed in SAS 9.4.  
22 All health-related expenditures were inflated to 2015 US dollars using the Personal Health Care (PHC)  
23 index.



**Appendix Table 7.** Description of the data source of health-related expenditures

|                            | <b>A. Cancer Survivors</b>                                                                                                        |                                                                                                             | <b>B. Individuals without Cancer</b>                                                 |                                                                                                         |
|----------------------------|-----------------------------------------------------------------------------------------------------------------------------------|-------------------------------------------------------------------------------------------------------------|--------------------------------------------------------------------------------------|---------------------------------------------------------------------------------------------------------|
|                            | Data source<br>(Excess or Total)                                                                                                  | Category                                                                                                    | Data source                                                                          | Category                                                                                                |
| <b>Medical expenditure</b> | Mariotto et al. 2011, SEER-Medicare, in 2010 US dollars (Excess)                                                                  | -by phase of care <sup>1</sup><br>-by age (under 65 vs. above 65 years old)<br>-by sex                      | Kim et al. 2018, MEPS 2013-2014, <i>in vivo</i> analysis, in 2014 US dollars (Total) | -Medical expenditure among all US adults<br>-by 32 subgroups stratified by age, sex, and race/ethnicity |
|                            |                                                                                                                                   |                                                                                                             | Hogen et al. 2001, SEER-Medicare (65+), in 2001 US dollars (Total)                   | -Medical expenditure in the end year of life among all US adults                                        |
| <b>Productivity loss</b>   | Zheng et al. 2016, MEPS 2008-2012, data available for colorectal, female breast, and prostate cancers, in 2012 US dollars (Total) | -by age                                                                                                     |                                                                                      |                                                                                                         |
|                            | Guy et al. 2013, MEPS 2008-2010, all types of cancer, in 2010 US dollars (Total)                                                  | -by age<br>-by time interval since cancer diagnosis (less than 1 year vs. greater than 1 year) <sup>2</sup> | Guy et al. 2013, MEPS 2008-2010, in 2010 US dollars (Total)                          | -by age                                                                                                 |
| <b>Patient time cost</b>   | Yabroff et al. 2014, MEPS 2008-2011, all types of cancer, in 2011 US dollars (Total)                                              | -by age                                                                                                     | Yabroff et al. 2014, MEPS 2008-2011, in 2011 US dollars (Total)                      | -by age                                                                                                 |

1. The definition of phases of care: 1) initial phase, defined as the first 12 months following diagnosis, 2) end-year of life phase, defined as the final 12 months of life, and 3) the continuing phase, defined as all the months between the initial phase and the end-year of life. The costs of end-year of life varied by cause of death, either cancer-specific death or death due to other causes.

2. Weighted means were calculated based on sample sizes and strata means.

## Reference

1. Shangguan S, Afshin A, Shulkin M, et al. A Meta-Analysis of Food Labeling Effects on Consumer Diet Behaviors and Industry Practices. *American journal of preventive medicine*. Feb 2019;56(2):300-314. doi:10.1016/j.amepre.2018.09.024
2. Food and Drug Administration. Food Labeling; Nutrition Labeling of Standard Menu Items in Restaurants and Similar Retail Food Establishments; Calorie Labeling of Articles of Food in Vending Machines; Final Rule In: Department of Health and Human Services, editor. 2014.
3. Long MW, Tobias DK, Craddock AL, Batchelder H, Gortmaker SL. Systematic review and meta-analysis of the impact of restaurant menu calorie labeling. *Am J Public Health*. 2015;105(5):e11-e24. doi:10.2105/AJPH.2015.302570
4. Petimar J, Zhang F, Cleveland LP, et al. Estimating the effect of calorie menu labeling on calories purchased in a large restaurant franchise in the southern United States: quasi-experimental study. *BMJ (Clinical research ed)*. 2019;367:l5837-l5837. doi:10.1136/bmj.l5837
5. Kaur A, researcher, Briggs ADM, academic v. Calorie labelling to reduce obesity. *BMJ (Clinical research ed)*. 2019;367:l6119-l6119. doi:10.1136/bmj.l6119
6. Auchincloss AH, Mallya GG, Leonberg BL, Ricchezza A, Glanz K, Schwarz DF. Customer responses to mandatory menu labeling at full-service restaurants. *American journal of preventive medicine*. 2013;45(6):710-719. doi:10.1016/j.amepre.2013.07.014
7. Littlewood JA, Lourenço S, Iversen CL, Hansen GL. Menu labelling is effective in reducing energy ordered and consumed: a systematic review and meta-analysis of recent studies. *Public Health Nutr*. 2016;19(12):2106-2121. doi:10.1017/S1368980015003468
8. Cantu-Jungles TM, McCormack LA, Slaven JE, Slebodnik M, Eicher-Miller HA. A Meta-Analysis to Determine the Impact of Restaurant Menu Labeling on Calories and Nutrients (Ordered or Consumed) in U.S. Adults. *Nutrients*. 2017;9(10):1088. doi:10.3390/nu9101088
9. Bleich SN, Wolfson JA, Jarlenski MP. Calorie changes in chain restaurant menu items: implications for obesity and evaluations of menu labeling. *American journal of preventive medicine*. Jan 2015;48(1):70-5. doi:10.1016/j.amepre.2014.08.026
10. Bleich SN, Wolfson JA, Jarlenski MP. Calorie Changes in Large Chain Restaurants: Declines in New Menu Items but Room for Improvement. *American journal of preventive medicine*. 2016;50(1):e1-e8. doi:10.1016/j.amepre.2015.05.007
11. Bleich SN, Wolfson JA, Jarlenski MP. Calorie changes in large chain restaurants from 2008 to 2015. *Preventive medicine*. Jul 2017;100:112-116. doi:10.1016/j.ypmed.2017.04.004
12. Bleich SN, Moran AJ, Jarlenski MP, Wolfson JA. Higher-Calorie Menu Items Eliminated in Large Chain Restaurants. *American journal of preventive medicine*. Feb 2018;54(2):214-220. doi:10.1016/j.amepre.2017.11.004
13. Bleich SN, Wolfson JA, Jarlenski MP, Block JP. Restaurants With Calories Displayed On Menus Had Lower Calorie Counts Compared To Restaurants Without Such Labels. *Health affairs (Project Hope)*. 2015;34(11):1877-1884. doi:10.1377/hlthaff.2015.0512
14. Centers for Disease Control and Prevention. NPCR and SEER Incidence – U.S. Cancer Statistics Public Use Databases. United States Department of Health and Human Services, Centers for Disease Control and Prevention and National Cancer Institute. Accessed September 4, 2019. [www.cdc.gov/cancer/uscs/public-use](http://www.cdc.gov/cancer/uscs/public-use)
15. Mariotto AB, Yabroff KR, Shao Y, Feuer EJ, Brown ML. Projections of the cost of cancer care in the United States: 2010-2020. *Journal of the National Cancer Institute*. Jan 19 2011;103(2):117-28. doi:10.1093/jnci/djq495
16. Clegg LX, Hankey BF, Tiwari R, Feuer EJ, Edwards BK. Estimating average annual per cent change in trend analysis. *Statistics in medicine*. Dec 20 2009;28(29):3670-82. doi:10.1002/sim.3733
17. United States Census Bureau. 2014 National Population Projections Tables. Accessed July 3, 2019. <https://www.census.gov/data/tables/2014/demo/popproj/2014-summary-tables.html>

- 1  
2  
3 18. National Cancer Institute. Surveillance research Program. Measures of Cancer Survival.  
4 <https://surveillance.cancer.gov/survival/measures.html>
- 5 19. Brenner H, Hakulinen T. Up-to-date and precise estimates of cancer patient survival: model-based  
6 period analysis. *American journal of epidemiology*. Oct 1 2006;164(7):689-96. doi:10.1093/aje/kwj243
- 7 20. Brenner H, Hakulinen T. Up-to-date cancer survival: period analysis and beyond. *International journal of*  
8 *cancer*. Mar 15 2009;124(6):1384-90. doi:10.1002/ijc.24021
- 9 21. National Cancer Institute. Surveillance Research Program. Cancer Survival Statistics: Cohort Definition  
10 Using Diagnosis Year. <https://surveillance.cancer.gov/survival/cohort.html>
- 11 22. Food and Drug Administration. *Justification of Estimates for Appropriations Committees Fiscal Year*  
12 *2012*. 2012.  
13 <https://www.fda.gov/downloads/AboutFDA/ReportsManualsForms/Reports/BudgetReports/UCM243370.pdf>
- 14 23. Food and Drug Administration. *The Nutrition Review Project. Report to the Director, Center for Food*  
15 *Safety and Applied Nutrition*. 2014. [http://www.fdalawblog.net/wp-](http://www.fdalawblog.net/wp-content/uploads/archives/docs/Nutrition%20Review%20Project.pdf)  
16 [content/uploads/archives/docs/Nutrition%20Review%20Project.pdf](http://www.fdalawblog.net/wp-content/uploads/archives/docs/Nutrition%20Review%20Project.pdf)
- 17 24. S. FaDAaHH. Food labeling; nutrition labeling of standard menu items in restaurants and similar retail  
18 food establishments. Final rule. *Fed Regist*. 2014;79(230):71155-71259.
- 19 25. Guy GP, Jr., Ekwueme DU, Yabroff KR, et al. Economic burden of cancer survivorship among adults in the  
20 United States. *Journal of clinical oncology : official journal of the American Society of Clinical Oncology*. Oct 20  
21 2013;31(30):3749-57. doi:10.1200/jco.2013.49.1241
- 22 26. Hogan C, Lunney J, Gabel J, Lynn J. Medicare beneficiaries' costs of care in the last year of life. *Health*  
23 *affairs (Project Hope)*. Jul-Aug 2001;20(4):188-95. doi:10.1377/hlthaff.20.4.188
- 24 27. Yabroff KR, Davis WW, Lamont EB, et al. Patient time costs associated with cancer care. *Journal of the*  
25 *National Cancer Institute*. Jan 3 2007;99(1):14-23. doi:10.1093/jnci/djk001
- 26 28. Yabroff KR, Guy GP, Jr., Ekwueme DU, et al. Annual patient time costs associated with medical care  
27 among cancer survivors in the United States. *Medical care*. Jul 2014;52(7):594-601.  
28 doi:10.1097/mlr.0000000000000151
- 29 29. Zheng Z, Yabroff KR, Guy GP, Jr., et al. Annual Medical Expenditure and Productivity Loss Among  
30 Colorectal, Female Breast, and Prostate Cancer Survivors in the United States. *Journal of the National Cancer*  
31 *Institute*. May 2016;108(5)doi:10.1093/jnci/djv382  
32  
33  
34  
35  
36  
37  
38  
39  
40  
41  
42  
43  
44  
45  
46  
47  
48  
49  
50  
51  
52  
53  
54  
55  
56  
57  
58  
59  
60

**Title** Cost-Effectiveness Analysis of the Federal Menu Calorie Labeling and Obesity-Associated Cancer Burdens in the United States

**Supplementary Table 1.** Defining Population and 32 Subgroups

**Supplementary Table 2.** Relative Risk Estimates of Etiologic Relationships Between Body Mass Index (BMI) and 13 Types of Cancers

**Supplementary Table 3.** Baseline Incidence Rates of 13 Cancers among US Adults by 32 Subgroups

**Supplementary Table 4.** Baseline 5-year Relative Survival Rates of 13 Cancers among US Adults by 32 Subgroups

**Supplementary Table 5.** Health-Related Quality of Life Among US Cancer Patients Aged 20 Years or Older, by Cancer Type and Phase of Care

**Supplementary Table 6.** Baseline Medical Costs, Productivity Loss, and Patient Time Costs Among US Cancer Patients Aged 20 Years or Older, by Cancer Type and Phase of Care

**Supplementary Table 7.** Baseline Medical Costs, Productivity Loss, and Patient Time Costs Among the General Population Aged 20 Years or Older in the US, by 32 Subgroups

**Supplementary Table 8.** Characteristics of US Adults Aged 20 Years or Older Participated in the NHANES, 2013-2016

**Supplementary Table 9.** Consumption of Calories from Full-Service and Fast-Food Restaurants among US Adults Participated in 2013-2016 NHANES, by 32 Subgroups

**Supplementary Table 10.** Estimated New Cancer Cases Averted by the Federal Menu Calorie Labeling in the US by Age, Sex, Race/Ethnicity, and Cancer Type, Over a Lifetime

**Supplementary Table 11.** Estimated Cancer Deaths Reduced by the Federal Menu Calorie Labeling in the US by Age, Sex, Race/Ethnicity, and Cancer Type, Over a Lifetime

**Supplementary Table 12.** Estimated Health Gains and Costs Associated with the Federal Menu Calorie Labeling on Reducing Cancer Burdens in the US Over a Lifetime, One-Way Sensitivity Analyses at 25% and 75% Calorie Compensations Outside the Restaurant Settings

**Supplementary Table 13.** Estimated Health Gains and Costs Associated with the Federal Menu Calorie Labeling on Reducing Cancer Burdens in the US Over a Lifetime, One-Way Sensitivity Analysis, Assuming all Full-Service and Fast-Food Restaurants were Covered by the Policy

**Supplementary Figure 1.** Diet and Cancer Outcome Model (DiCOM)

**Supplementary Figure 2.** Estimated Reduced New Cancer Cases and Deaths Associated with the Federal Menu Calorie Labeling in the US by Age, Sex, Race/Ethnicity, and Cancer Type, Over a Lifetime

**Supplementary Figure 3.** Estimated life Years and QALYs Gained Associated with the Federal Menu Calorie Labeling in the US by Age, Sex, and Race/Ethnicity, Over a Lifetime.

**Supplementary Figure 4.** Estimated Changes of Health-Related Costs Associated with the Federal Menu Calorie Labeling in the US by Age, Sex, Race/Ethnicity, and Cancer Type, Over a Lifetime

**Supplementary Figure 5.** Estimated Net Costs from Societal and Healthcare Perspectives Associated with the Federal Menu Calorie Labeling in the US by Age, Sex, and Race/Ethnicity, Over a Lifetime

**Supplementary Figure 6.** One-Way Sensitivity Analysis of Net Costs of the Federal Menu Calorie Labeling and Obesity-Associated Cancer Rates to Varying Assumptions of Key Input Parameters From (A) Societal Perspective and (B) Healthcare Perspective

**Supplementary Table 1.** Defining population and 32 subgroups

| <b>Subgroups</b> | <b>Age</b> | <b>Sex</b> | <b>Race/Ethnicity</b> |
|------------------|------------|------------|-----------------------|
| <b>1</b>         | 20-44y     | Female     | NHW                   |
| <b>2</b>         | 20-44y     | Female     | NHB                   |
| <b>3</b>         | 20-44y     | Female     | HISP                  |
| <b>4</b>         | 20-44y     | Female     | OTH                   |
| <b>5</b>         | 20-44y     | Male       | NHW                   |
| <b>6</b>         | 20-44y     | Male       | NHB                   |
| <b>7</b>         | 20-44y     | Male       | HISP                  |
| <b>8</b>         | 20-44y     | Male       | OTH                   |
| <b>9</b>         | 45-54y     | Female     | NHW                   |
| <b>10</b>        | 45-54y     | Female     | NHB                   |
| <b>11</b>        | 45-54y     | Female     | HISP                  |
| <b>12</b>        | 45-54y     | Female     | OTH                   |
| <b>13</b>        | 45-54y     | Male       | NHW                   |
| <b>14</b>        | 45-54y     | Male       | NHB                   |
| <b>15</b>        | 45-54y     | Male       | HISP                  |
| <b>16</b>        | 45-54y     | Male       | OTH                   |
| <b>17</b>        | 55-64y     | Female     | NHW                   |
| <b>18</b>        | 55-64y     | Female     | NHB                   |
| <b>19</b>        | 55-64y     | Female     | HISP                  |
| <b>20</b>        | 55-64y     | Female     | OTH                   |
| <b>21</b>        | 55-64y     | Male       | NHW                   |
| <b>22</b>        | 55-64y     | Male       | NHB                   |
| <b>23</b>        | 55-64y     | Male       | HISP                  |
| <b>24</b>        | 55-64y     | Male       | OTH                   |
| <b>25</b>        | 65+y       | Female     | NHW                   |
| <b>26</b>        | 65+y       | Female     | NHB                   |
| <b>27</b>        | 65+y       | Female     | HISP                  |
| <b>28</b>        | 65+y       | Female     | OTH                   |
| <b>29</b>        | 65+y       | Male       | NHW                   |
| <b>30</b>        | 65+y       | Male       | NHB                   |
| <b>31</b>        | 65+y       | Male       | HISP                  |
| <b>32</b>        | 65+y       | Male       | OTH                   |

**Supplementary Table 2.** Relative risk estimates of etiologic relationships between body mass index (BMI) and 13 types of cancers

| Cancer Type                    | No. of Studies | No. of Events | Source                   | Evidence Grading           | RR (95% CI)<br>Per 5 kg/m <sup>2</sup> | Statistical Heterogeneity         |
|--------------------------------|----------------|---------------|--------------------------|----------------------------|----------------------------------------|-----------------------------------|
| Endometrial                    | 26             | 18,717        | CUP, 2013                | Convincing<br>↑risk        | 1.50 (1.42-1.59)                       | I <sup>2</sup> =86.2%<br>P<0.0001 |
| Esophageal<br>(adenocarcinoma) | 9              | 1,725         | CUP, 2016                | Convincing<br>↑risk        | 1.48 (1.35-1.62)                       | I <sup>2</sup> =36.7%<br>P=0.13   |
| Kidney                         | 23             | 15,575        | CUP, 2015                | Convincing<br>↑risk        | 1.30 (1.25-1.35)                       | I <sup>2</sup> =38.8%<br>P=0.03   |
| Liver                          | 12             | 14,311        | CUP, 2015                | Convincing<br>↑risk        | 1.30 (1.16-1.46)                       | I <sup>2</sup> =78.3%<br>P=0.000  |
| Gallbladder                    | 8              | 6,004         | CUP, 2015                | Probable<br>↑risk          | 1.25 (1.15-1.37)                       | I <sup>2</sup> =52.3%<br>P=0.04   |
| Stomach (cardia)               | 7              | 2,050         | CUP, 2016                | Probable<br>↑risk          | 1.23 (1.07-1.40)                       | I <sup>2</sup> =55.6%<br>P=0.04   |
| Breast (post-<br>menopausal)   | 56             | 80,404        | CUP, 2017                | Convincing<br>↑risk        | 1.12 (1.09-1.15)                       | I <sup>2</sup> =75%<br>P<0.001    |
| Pancreas                       | 23             | 9,504         | CUP, 2011                | Convincing<br>↑risk        | 1.10 (1.07-1.14)                       | I <sup>2</sup> =19%<br>P=0.20     |
| Multiple myeloma               | 20             | 1,388         | IARC, 2016 <sup>30</sup> | Sufficient (IRAC)<br>↑risk | 1.09 (1.03-1.16)                       | Not reported                      |
| Prostate (advanced)            | 24             | 11,149        | CUP, 2014                | Probable<br>↑risk          | 1.08 (1.04-1.12)                       | I <sup>2</sup> =18.8%<br>P=0.21   |
| Thyroid                        | 22             | 3,100         | IARC, 2016 <sup>30</sup> | Sufficient (IARC)<br>↑risk | 1.06 (1.02-1.10)                       | Not reported                      |
| Ovary                          | 25             | 15,899        | CUP, 2013                | Probable<br>↑risk          | 1.06 (1.02-1.11)                       | I <sup>2</sup> =55.1%<br>P=0.001  |
| Colorectal                     | 38             | 71,089        | CUP, 2017                | Convincing<br>↑risk        | 1.05 (1.03-1.07)                       | I <sup>2</sup> =74.2%<br>P=0.000  |

**Supplementary Table 3. Baseline incidence rates of 13 cancers among US adults by 32 subgroups**

| Subgroup | Colorectal Cancer |       | Endometrial Cancer |      | Esophageal Adeno-carcinoma |      | Female Breast (Postmeno.) |       | Gallbladder Cancer |      | Kidney Cancer |      | Liver Cancer |      | Multiple Myeloma |      | Ovarian cancer |      | Pancreatic Cancer |      | Advanced Prostate Cancer |      | Stomach Cancer (Gastric Cardia) |      | Thyroid Cancer |      |
|----------|-------------------|-------|--------------------|------|----------------------------|------|---------------------------|-------|--------------------|------|---------------|------|--------------|------|------------------|------|----------------|------|-------------------|------|--------------------------|------|---------------------------------|------|----------------|------|
|          | Rate              | SE    | Rate               | SE   | Rate                       | SE   | Rate                      | SE    | Rate               | SE   | Rate          | SE   | Rate         | SE   | Rate             | SE   | Rate           | SE   | Rate              | SE   | Rate                     | SE   | Rate                            | SE   | Rate           | SE   |
| 1        | 8.53              | 0.38  | 6.54               | 3.66 | 0.05                       | 4.18 | 0.00                      | 0.00  | 0.05               | 2.57 | 3.83          | 3.16 | 0.49         | 4.18 | 0.38             | 4.66 | 4.31           | 0.27 | 107               | 3.46 | 0.00                     | 0.00 | 0.10                            | 3.82 | 28.97          | 0.69 |
| 2        | 7.78              | 0.74  | 5.04               | 0.59 | 0.03                       | 0.20 | 0.00                      | 0.00  | 0.07               | 2.46 | 3.57          | 0.50 | 0.56         | 0.20 | 102              | 0.27 | 2.98           | 0.45 | 103               | 0.26 | 0.00                     | 0.00 | 0.09                            | 2.25 | 13.12          | 0.95 |
| 3        | 6.09              | 0.55  | 7.49               | 3.32 | 0.03                       | 3.07 | 0.00                      | 0.00  | 0.06               | 2.48 | 3.73          | 3.16 | 0.42         | 3.07 | 0.33             | 3.71 | 3.95           | 0.46 | 0.86              | 0.87 | 0.00                     | 0.00 | 0.09                            | 2.27 | 20.97          | 1.13 |
| 4        | 6.36              | 1.10  | 6.56               | 1.13 | 0.02                       | 0.15 | 0.00                      | 0.00  | 0.07               | 2.58 | 1.87          | 0.40 | 0.32         | 0.15 | 0.38             | 0.23 | 4.49           | 0.70 | 0.74              | 0.25 | 0.00                     | 0.00 | 0.09                            | 2.36 | 24.88          | 2.21 |
| 5        | 9.20              | 0.39  | 0.00               | 0.00 | 0.42                       | 5.22 | 0.00                      | 0.00  | 0.04               | 0.02 | 5.91          | 4.53 | 0.60         | 5.22 | 0.48             | 5.26 | 0.00           | 0.00 | 122               | 2.06 | 0.21                     | 0.02 | 0.43                            | 4.32 | 6.93           | 0.34 |
| 6        | 7.94              | 0.78  | 0.00               | 0.00 | 0.29                       | 0.30 | 0.00                      | 0.00  | 0.04               | 0.02 | 5.47          | 0.65 | 1.17         | 0.30 | 148              | 0.34 | 0.00           | 0.00 | 100               | 0.28 | 0.56                     | 0.09 | 0.34                            | 3.42 | 2.36           | 0.42 |
| 7        | 6.15              | 0.54  | 0.00               | 0.00 | 0.31                       | 3.85 | 0.00                      | 0.00  | 0.04               | 0.02 | 4.04          | 3.82 | 0.82         | 3.85 | 0.57             | 0.18 | 0.00           | 0.00 | 0.83              | 0.20 | 0.13                     | 0.68 | 0.34                            | 3.53 | 3.80           | 0.44 |
| 8        | 6.21              | 0.85  | 0.00               | 0.00 | 0.31                       | 0.47 | 0.00                      | 0.00  | 0.05               | 0.02 | 3.68          | 1.04 | 1.59         | 0.47 | 0.70             | 140  | 0.00           | 0.00 | 0.82              | 0.29 | 0.41                     | 0.09 | 0.36                            | 3.52 | 5.70           | 0.84 |
| 9        | 4127              | 0.76  | 38.53              | 0.73 | 103                        | 0.21 | 124.56                    | 1.28  | 0.68               | 5.99 | 14.03         | 0.44 | 3.10         | 0.21 | 3.60             | 0.22 | 17.09          | 0.49 | 7.70              | 0.32 | 0.00                     | 0.00 | 0.88                            | 6.74 | 37.84          | 0.73 |
| 10       | 53.14             | 1.92  | 25.73              | 1.34 | 0.59                       | 0.60 | 121.73                    | 2.88  | 1.54               | 5.87 | 16.08         | 1.06 | 5.17         | 0.60 | 11.29            | 0.89 | 11.75          | 0.90 | 10.91             | 0.87 | 0.00                     | 0.00 | 0.94                            | 5.38 | 25.80          | 1.34 |
| 11       | 33.92             | 1.78  | 33.43              | 1.53 | 0.59                       | 0.52 | 77.25                     | 3.45  | 2.27               | 1.93 | 16.00         | 1.04 | 3.83         | 0.52 | 4.86             | 0.58 | 14.57          | 1.00 | 6.26              | 0.66 | 0.00                     | 0.00 | 0.81                            | 5.61 | 37.29          | 1.84 |
| 12       | 35.77             | 3.15  | 35.84              | 3.07 | 0.65                       | 0.66 | 91.82                     | 4.82  | 1.70               | 6.05 | 7.78          | 1.92 | 3.27         | 0.66 | 2.55             | 0.70 | 17.07          | 1.51 | 5.17              | 0.81 | 0.00                     | 0.00 | 0.85                            | 5.53 | 37.73          | 2.90 |
| 13       | 53.97             | 0.87  | 0.00               | 0.00 | 5.61                       | 0.36 | 0.00                      | 0.00  | 0.36               | 7.15 | 29.16         | 0.64 | 9.24         | 0.36 | 5.09             | 0.27 | 0.00           | 0.00 | 10.63             | 0.38 | 10.88                    | 0.16 | 3.65                            | 0.23 | 13.29          | 0.43 |
| 14       | 61.29             | 2.20  | 0.00               | 0.00 | 1.50                       | 1.02 | 0.00                      | 0.00  | 0.47               | 5.07 | 32.82         | 1.61 | 13.29        | 1.02 | 12.34            | 0.99 | 0.00           | 0.00 | 14.12             | 1.05 | 25.31                    | 0.58 | 1.90                            | 0.33 | 6.41           | 0.71 |
| 15       | 38.05             | 1.94  | 0.00               | 0.00 | 2.75                       | 1.06 | 0.00                      | 0.00  | 0.43               | 4.83 | 24.48         | 1.27 | 16.38        | 1.06 | 5.23             | 0.60 | 0.00           | 0.00 | 7.95              | 0.74 | 6.02                     | 0.38 | 1.96                            | 0.34 | 8.56           | 0.76 |
| 16       | 42.81             | 3.85  | 0.00               | 0.00 | 2.88                       | 2.28 | 0.00                      | 0.00  | 0.37               | 4.93 | 18.63         | 3.06 | 18.71        | 2.28 | 3.70             | 0.82 | 0.00           | 0.00 | 7.62              | 1.05 | 3.70                     | 0.50 | 2.51                            | 0.17 | 12.57          | 1.36 |
| 17       | 59.74             | 0.89  | 90.00              | 1.09 | 2.12                       | 0.35 | 305.45                    | 2.02  | 1.75               | 0.15 | 26.14         | 0.59 | 9.41         | 0.35 | 8.68             | 0.34 | 26.19          | 0.59 | 21.78             | 0.54 | 0.00                     | 0.00 | 1.72                            | 0.15 | 34.42          | 0.67 |
| 18       | 86.11             | 2.62  | 83.71              | 2.60 | 1.30                       | 1.21 | 306.22                    | 4.92  | 4.08               | 0.57 | 31.53         | 1.58 | 18.22        | 1.21 | 23.28            | 1.37 | 19.79          | 1.25 | 31.37             | 1.58 | 0.00                     | 0.00 | 1.92                            | 0.39 | 27.72          | 1.48 |
| 19       | 58.14             | 2.91  | 69.51              | 3.28 | 1.64                       | 1.33 | 218.85                    | 7.01  | 4.59               | 0.68 | 29.93         | 1.73 | 17.38        | 1.33 | 9.33             | 0.97 | 21.29          | 1.45 | 17.15             | 1.32 | 0.00                     | 0.00 | 1.87                            | 0.34 | 39.44          | 1.97 |
| 20       | 52.83             | 4.48  | 60.22              | 4.45 | 1.49                       | 1.97 | 233.48                    | 8.33  | 2.44               | 0.50 | 13.91         | 2.72 | 12.58        | 1.97 | 6.13             | 0.96 | 23.98          | 2.79 | 13.44             | 1.43 | 0.00                     | 0.00 | 1.57                            | 0.13 | 41.74          | 3.08 |
| 21       | 88.14             | 1.11  | 0.00               | 0.00 | 15.54                      | 0.73 | 0.00                      | 0.00  | 0.93               | 0.11 | 53.65         | 0.87 | 37.93        | 0.73 | 13.24            | 0.43 | 0.00           | 0.00 | 29.95             | 0.65 | 47.05                    | 0.34 | 9.19                            | 0.36 | 16.24          | 0.48 |
| 22       | 121.39            | 3.41  | 0.00               | 0.00 | 4.30                       | 2.72 | 0.00                      | 0.00  | 2.06               | 0.41 | 69.05         | 2.57 | 75.50        | 2.72 | 30.69            | 1.71 | 0.00           | 0.00 | 39.72             | 1.95 | 91.41                    | 1.22 | 4.87                            | 0.68 | 9.12           | 0.92 |
| 23       | 84.75             | 3.65  | 0.00               | 0.00 | 8.01                       | 2.98 | 0.00                      | 0.00  | 1.07               | 0.11 | 51.05         | 2.35 | 61.05        | 2.98 | 13.65            | 1.22 | 0.00           | 0.00 | 23.36             | 1.58 | 32.10                    | 1.21 | 5.15                            | 0.70 | 11.12          | 1.09 |
| 24       | 83.77             | 5.72  | 0.00               | 0.00 | 4.97                       | 4.85 | 0.00                      | 0.00  | 1.22               | 0.11 | 27.95         | 3.81 | 54.13        | 4.85 | 10.32            | 1.39 | 0.00           | 0.00 | 19.14             | 2.87 | 22.70                    | 1.31 | 5.16                            | 0.96 | 16.04          | 1.75 |
| 25       | 147.25            | 1.98  | 86.90              | 1.40 | 4.53                       | 0.62 | 429.43                    | 3.20  | 5.87               | 0.40 | 42.37         | 1.02 | 15.56        | 0.62 | 20.59            | 0.73 | 38.18          | 0.97 | 55.49             | 1.20 | 0.00                     | 0.00 | 4.36                            | 0.34 | 24.59          | 0.74 |
| 26       | 155.86            | 5.74  | 100.81             | 4.21 | 3.10                       | 1.98 | 398.07                    | 8.74  | 9.68               | 1.43 | 50.03         | 3.07 | 20.61        | 1.98 | 50.31            | 3.20 | 29.78          | 2.45 | 71.93             | 3.94 | 0.00                     | 0.00 | 3.41                            | 0.52 | 22.57          | 1.98 |
| 27       | 117.47            | 5.72  | 66.40              | 4.47 | 3.61                       | 3.17 | 285.07                    | 11.57 | 11.44              | 1.75 | 45.35         | 3.33 | 38.69        | 3.17 | 24.20            | 2.52 | 32.78          | 2.88 | 51.54             | 3.79 | 0.00                     | 0.00 | 3.89                            | 0.60 | 29.50          | 2.55 |
| 28       | 109.32            | 10.15 | 52.12              | 5.29 | 3.51                       | 4.72 | 266.14                    | 14.52 | 7.02               | 1.70 | 26.14         | 4.17 | 35.77        | 4.72 | 14.41            | 2.43 | 23.90          | 2.89 | 46.15             | 5.64 | 0.00                     | 0.00 | 4.11                            | 0.28 | 28.15          | 3.08 |
| 29       | 181.07            | 2.47  | 0.00               | 0.00 | 29.02                      | 1.10 | 0.00                      | 0.00  | 3.59               | 0.36 | 88.69         | 1.63 | 40.30        | 1.10 | 34.26            | 1.07 | 0.00           | 0.00 | 72.36             | 1.53 | 80.74                    | 0.61 | 19.38                           | 0.77 | 17.34          | 0.69 |
| 30       | 217.23            | 8.36  | 0.00               | 0.00 | 7.29                       | 3.98 | 0.00                      | 0.00  | 6.24               | 1.14 | 97.13         | 5.16 | 68.31        | 3.98 | 69.18            | 4.66 | 0.00           | 0.00 | 75.66             | 4.94 | 130.67                   | 2.34 | 8.81                            | 1.55 | 10.03          | 1.60 |
| 31       | 182.00            | 9.21  | 0.00               | 0.00 | 15.50                      | 5.01 | 0.00                      | 0.00  | 6.79               | 1.64 | 87.20         | 5.26 | 78.18        | 5.01 | 33.10            | 3.44 | 0.00           | 0.00 | 61.88             | 4.77 | 66.33                    | 2.57 | 11.49                           | 1.78 | 15.87          | 2.11 |
| 32       | 144.37            | 13.43 | 0.00               | 0.00 | 10.56                      | 7.52 | 0.00                      | 0.00  | 4.75               | 1.02 | 54.45         | 7.24 | 79.16        | 7.52 | 22.48            | 3.35 | 0.00           | 0.00 | 51.45             | 6.82 | 51.84                    | 2.78 | 11.34                           | 2.12 | 13.86          | 2.28 |

Supplementary Table 4. Baseline 5-year relative survival rates of 13 cancers among US adults by 32 subgroups

| Subgroup | Colorectal Cancer |       | Endometrial Cancer |       | Esophageal Adeno-carcinoma |       | Female Breast (Postmeno.) |       | Gallbladder Cancer |       | Kidney Cancer |       | Liver Cancer |       | Multiple Myeloma |       | Ovarian Cancer |       | Pancreatic Cancer |       | Advanced Prostate Cancer |       | Stomach Cancer (Gastric Cardia) |       | Thyroid Cancer |       |
|----------|-------------------|-------|--------------------|-------|----------------------------|-------|---------------------------|-------|--------------------|-------|---------------|-------|--------------|-------|------------------|-------|----------------|-------|-------------------|-------|--------------------------|-------|---------------------------------|-------|----------------|-------|
|          | Rate              | SE    | Rate               | SE    | Rate                       | SE    | Rate                      | SE    | Rate               | SE    | Rate          | SE    | Rate         | SE    | Rate             | SE    | Rate           | SE    | Rate              | SE    | Rate                     | SE    | Rate                            | SE    | Rate           | SE    |
| 1        | 0.740             | 0.012 | 0.916              | 0.009 | 0.223                      | 0.018 | 0.000                     | 0.000 | 0.095              | 0.095 | 0.953         | 0.009 | 0.409        | 0.057 | 0.852            | 0.043 | 0.780          | 0.015 | 0.379             | 0.038 | 0.000                    | 0.000 | 0.477                           | 0.099 | 1.000          | 0.001 |
| 2        | 0.652             | 0.024 | 0.775              | 0.027 | 0.223                      | 0.018 | 0.000                     | 0.000 | 0.286              | 0.064 | 0.856         | 0.029 | 0.144        | 0.113 | 0.837            | 0.048 | 0.736          | 0.036 | 0.530             | 0.064 | 0.000                    | 0.000 | 0.502                           | 0.205 | 0.993          | 0.004 |
| 3        | 0.659             | 0.022 | 0.900              | 0.013 | 0.223                      | 0.018 | 0.000                     | 0.000 | 0.309              | 0.092 | 0.864         | 0.021 | 0.403        | 0.081 | 0.713            | 0.075 | 0.716          | 0.024 | 0.493             | 0.062 | 0.000                    | 0.000 | 0.236                           | 0.116 | 0.992          | 0.002 |
| 4        | 0.694             | 0.027 | 0.910              | 0.016 | 0.223                      | 0.018 | 0.000                     | 0.000 | 0.286              | 0.064 | 0.819         | 0.043 | 0.321        | 0.077 | 0.787            | 0.122 | 0.737          | 0.029 | 0.371             | 0.076 | 0.000                    | 0.000 | 0.667                           | 0.193 | 1.000          | 0.002 |
| 5        | 0.682             | 0.012 | 0.000              | 0.000 | 0.140                      | 0.034 | 0.000                     | 0.000 | 0.302              | 0.117 | 0.886         | 0.010 | 0.251        | 0.037 | 0.696            | 0.041 | 0.000          | 0.000 | 0.275             | 0.032 | 0.768                    | 0.057 | 0.284                           | 0.045 | 0.997          | 0.002 |
| 6        | 0.601             | 0.027 | 0.000              | 0.000 | 0.160                      | 0.031 | 0.000                     | 0.000 | 0.357              | 0.096 | 0.779         | 0.027 | 0.157        | 0.045 | 0.606            | 0.057 | 0.000          | 0.000 | 0.151             | 0.046 | 0.780                    | 0.086 | 0.672                           | 0.274 | 0.949          | 0.025 |
| 7        | 0.621             | 0.022 | 0.000              | 0.000 | 0.330                      | 0.108 | 0.000                     | 0.000 | 0.357              | 0.096 | 0.847         | 0.020 | 0.227        | 0.047 | 0.635            | 0.064 | 0.000          | 0.000 | 0.157             | 0.044 | 0.470                    | 0.118 | 0.152                           | 0.055 | 0.993          | 0.007 |
| 8        | 0.635             | 0.029 | 0.000              | 0.000 | 0.287                      | 0.172 | 0.000                     | 0.000 | 0.357              | 0.096 | 0.840         | 0.033 | 0.152        | 0.032 | 0.649            | 0.108 | 0.000          | 0.000 | 0.230             | 0.066 | 0.805                    | 0.180 | 0.545                           | 0.133 | 0.992          | 0.008 |
| 9        | 0.738             | 0.007 | 0.889              | 0.006 | 0.300                      | 0.065 | 0.918                     | 0.003 | 0.153              | 0.045 | 0.846         | 0.011 | 0.283        | 0.027 | 0.682            | 0.027 | 0.614          | 0.012 | 0.195             | 0.017 | 0.000                    | 0.000 | 0.384                           | 0.060 | 0.997          | 0.002 |
| 10       | 0.666             | 0.015 | 0.751              | 0.022 | 0.290                      | 0.174 | 0.810                     | 0.009 | 0.155              | 0.059 | 0.834         | 0.025 | 0.145        | 0.035 | 0.626            | 0.034 | 0.497          | 0.034 | 0.177             | 0.029 | 0.000                    | 0.000 | 0.457                           | 0.144 | 0.990          | 0.008 |
| 11       | 0.725             | 0.016 | 0.869              | 0.012 | 0.751                      | 0.217 | 0.881                     | 0.008 | 0.224              | 0.062 | 0.879         | 0.018 | 0.242        | 0.038 | 0.617            | 0.047 | 0.595          | 0.025 | 0.209             | 0.035 | 0.000                    | 0.000 | 0.257                           | 0.079 | 0.983          | 0.005 |
| 12       | 0.731             | 0.018 | 0.893              | 0.012 | 0.308                      | 0.060 | 0.926                     | 0.007 | 0.210              | 0.082 | 0.810         | 0.037 | 0.287        | 0.051 | 0.686            | 0.071 | 0.640          | 0.027 | 0.307             | 0.055 | 0.000                    | 0.000 | 0.357                           | 0.152 | 0.991          | 0.005 |
| 13       | 0.704             | 0.007 | 0.000              | 0.000 | 0.255                      | 0.020 | 0.000                     | 0.000 | 0.321              | 0.072 | 0.790         | 0.009 | 0.171        | 0.011 | 0.627            | 0.023 | 0.000          | 0.000 | 0.136             | 0.012 | 0.858                    | 0.010 | 0.253                           | 0.024 | 0.964          | 0.007 |
| 14       | 0.612             | 0.015 | 0.000              | 0.000 | 0.186                      | 0.085 | 0.000                     | 0.000 | 0.371              | 0.127 | 0.793         | 0.020 | 0.117        | 0.019 | 0.616            | 0.037 | 0.000          | 0.000 | 0.138             | 0.022 | 0.814                    | 0.020 | 0.148                           | 0.059 | 0.970          | 0.027 |
| 15       | 0.652             | 0.015 | 0.000              | 0.000 | 0.222                      | 0.050 | 0.000                     | 0.000 | 0.151              | 0.082 | 0.742         | 0.019 | 0.181        | 0.016 | 0.640            | 0.044 | 0.000          | 0.000 | 0.101             | 0.021 | 0.729                    | 0.029 | 0.257                           | 0.060 | 0.945          | 0.019 |
| 16       | 0.721             | 0.017 | 0.000              | 0.000 | 0.308                      | 0.110 | 0.000                     | 0.000 | 0.751              | 0.153 | 0.799         | 0.027 | 0.239        | 0.023 | 0.594            | 0.066 | 0.000          | 0.000 | 0.162             | 0.039 | 0.865                    | 0.040 | 0.298                           | 0.080 | 0.960          | 0.018 |
| 17       | 0.694             | 0.007 | 0.878              | 0.004 | 0.322                      | 0.043 | 0.918                     | 0.002 | 0.273              | 0.035 | 0.793         | 0.010 | 0.208        | 0.015 | 0.630            | 0.019 | 0.531          | 0.011 | 0.117             | 0.009 | 0.000                    | 0.000 | 0.334                           | 0.041 | 0.994          | 0.002 |
| 18       | 0.621             | 0.014 | 0.667              | 0.015 | 0.298                      | 0.039 | 0.830                     | 0.007 | 0.151              | 0.043 | 0.805         | 0.022 | 0.219        | 0.028 | 0.609            | 0.027 | 0.371          | 0.028 | 0.112             | 0.018 | 0.000                    | 0.000 | 0.440                           | 0.113 | 0.971          | 0.012 |
| 19       | 0.673             | 0.016 | 0.816              | 0.013 | 0.241                      | 0.131 | 0.879                     | 0.006 | 0.173              | 0.044 | 0.769         | 0.021 | 0.211        | 0.025 | 0.535            | 0.042 | 0.473          | 0.025 | 0.104             | 0.019 | 0.000                    | 0.000 | 0.279                           | 0.101 | 0.969          | 0.009 |
| 20       | 0.714             | 0.017 | 0.847              | 0.013 | 0.298                      | 0.039 | 0.911                     | 0.006 | 0.151              | 0.061 | 0.785         | 0.032 | 0.288        | 0.033 | 0.631            | 0.051 | 0.555          | 0.031 | 0.164             | 0.027 | 0.000                    | 0.000 | 0.281                           | 0.140 | 0.987          | 0.008 |
| 21       | 0.666             | 0.006 | 0.000              | 0.000 | 0.257                      | 0.013 | 0.000                     | 0.000 | 0.190              | 0.045 | 0.760         | 0.008 | 0.202        | 0.007 | 0.603            | 0.016 | 0.000          | 0.000 | 0.111             | 0.007 | 0.878                    | 0.006 | 0.255                           | 0.016 | 0.954          | 0.009 |
| 22       | 0.579             | 0.013 | 0.000              | 0.000 | 0.178                      | 0.072 | 0.000                     | 0.000 | 0.261              | 0.105 | 0.758         | 0.019 | 0.140        | 0.012 | 0.545            | 0.028 | 0.000          | 0.000 | 0.080             | 0.014 | 0.786                    | 0.014 | 0.148                           | 0.046 | 0.945          | 0.039 |
| 23       | 0.628             | 0.014 | 0.000              | 0.000 | 0.135                      | 0.033 | 0.000                     | 0.000 | 0.203              | 0.081 | 0.717         | 0.018 | 0.170        | 0.013 | 0.541            | 0.037 | 0.000          | 0.000 | 0.078             | 0.015 | 0.777                    | 0.017 | 0.281                           | 0.053 | 0.899          | 0.028 |
| 24       | 0.654             | 0.015 | 0.000              | 0.000 | 0.237                      | 0.082 | 0.000                     | 0.000 | 0.148              | 0.069 | 0.698         | 0.025 | 0.268        | 0.017 | 0.485            | 0.050 | 0.000          | 0.000 | 0.122             | 0.023 | 0.885                    | 0.019 | 0.257                           | 0.061 | 0.967          | 0.022 |
| 25       | 0.610             | 0.005 | 0.799              | 0.006 | 0.182                      | 0.024 | 0.907                     | 0.003 | 0.179              | 0.018 | 0.679         | 0.010 | 0.119        | 0.010 | 0.420            | 0.012 | 0.323          | 0.008 | 0.057             | 0.003 | 0.000                    | 0.000 | 0.231                           | 0.023 | 0.958          | 0.005 |
| 26       | 0.551             | 0.012 | 0.552              | 0.016 | 0.170                      | 0.143 | 0.806                     | 0.008 | 0.217              | 0.043 | 0.709         | 0.024 | 0.097        | 0.020 | 0.407            | 0.022 | 0.210          | 0.021 | 0.059             | 0.009 | 0.000                    | 0.000 | 0.264                           | 0.068 | 0.894          | 0.023 |
| 27       | 0.579             | 0.013 | 0.699              | 0.017 | 0.190                      | 0.073 | 0.858                     | 0.008 | 0.125              | 0.023 | 0.677         | 0.022 | 0.087        | 0.014 | 0.353            | 0.027 | 0.298          | 0.022 | 0.049             | 0.009 | 0.000                    | 0.000 | 0.257                           | 0.060 | 0.889          | 0.020 |
| 28       | 0.599             | 0.013 | 0.735              | 0.020 | 0.180                      | 0.022 | 0.900                     | 0.007 | 0.115              | 0.030 | 0.614         | 0.032 | 0.187        | 0.017 | 0.440            | 0.040 | 0.356          | 0.029 | 0.043             | 0.008 | 0.000                    | 0.000 | 0.187                           | 0.067 | 0.858          | 0.023 |
| 29       | 0.615             | 0.005 | 0.000              | 0.000 | 0.212                      | 0.011 | 0.000                     | 0.000 | 0.134              | 0.025 | 0.680         | 0.008 | 0.119        | 0.007 | 0.402            | 0.011 | 0.000          | 0.000 | 0.075             | 0.004 | 0.717                    | 0.007 | 0.220                           | 0.013 | 0.935          | 0.015 |
| 30       | 0.498             | 0.014 | 0.000              | 0.000 | 0.164                      | 0.069 | 0.000                     | 0.000 | 0.209              | 0.076 | 0.705         | 0.024 | 0.134        | 0.019 | 0.459            | 0.027 | 0.000          | 0.000 | 0.049             | 0.011 | 0.569                    | 0.017 | 0.174                           | 0.052 | 0.810          | 0.068 |
| 31       | 0.544             | 0.013 | 0.000              | 0.000 | 0.155                      | 0.035 | 0.000                     | 0.000 | 0.144              | 0.046 | 0.668         | 0.020 | 0.107        | 0.012 | 0.398            | 0.028 | 0.000          | 0.000 | 0.066             | 0.011 | 0.674                    | 0.017 | 0.141                           | 0.032 | 0.786          | 0.048 |
| 32       | 0.625             | 0.013 | 0.000              | 0.000 | 0.126                      | 0.049 | 0.000                     | 0.000 | 0.263              | 0.071 | 0.653         | 0.026 | 0.182        | 0.014 | 0.431            | 0.037 | 0.000          | 0.000 | 0.080             | 0.013 | 0.733                    | 0.020 | 0.255                           | 0.042 | 0.800          | 0.039 |



**Supplementary Table 5.** Health-related quality of life among US cancer patients aged 20 years or older, by cancer type and phase of care

| Cancer Type                     | Cancer Phase | Health Related Quality of Life | Source                               |
|---------------------------------|--------------|--------------------------------|--------------------------------------|
|                                 |              | mean (SE)                      |                                      |
| Endometrial                     | Overall      | 0.80 (0.14)                    | Naik et al. <sup>31</sup>            |
| Esophageal Adenocarcinoma       | Overall      | 0.69 (0.26)                    | Wildi et al. <sup>32</sup>           |
| Kidney                          | Overall      | 0.78 (0.14)                    | Pickard et al. <sup>33</sup>         |
| Liver                           | Overall      | 0.79 (0.19)                    | Naik et al. <sup>31</sup>            |
| Gallbladder                     | Overall      | 0.79 (0.19)                    | Naik et al. <sup>31</sup>            |
| Stomach (gastric cardia)        | Initial:     | 0.84 (0.25)                    | Zhou et al. <sup>34</sup>            |
|                                 | Continuous:  | 0.86 (0.24)                    |                                      |
|                                 | End of Life: | 0.65 (0.33)                    |                                      |
| Female Breast (post-menopausal) | Initial:     | 0.78 (0.19)                    | Yabroff et al. <sup>35</sup>         |
|                                 | Continuous:  | 0.81 (0.20)                    |                                      |
|                                 | End of Life: | 0.64 (0.16)                    |                                      |
| Pancreas                        | Overall      | 0.65 (0.30)                    | Müller-Nordhorn et al. <sup>36</sup> |
| Multiple myeloma                | Overall      | 0.79 (0.19)                    | Naik et al. <sup>31</sup>            |
| Advanced Prostate               | Initial:     | 0.78 (0.20)                    | Yabroff et al. <sup>35</sup>         |
|                                 | Continuous:  | 0.76 (0.19)                    |                                      |
|                                 | End of Life: | 0.59 (0.15)                    |                                      |
| Thyroid                         | Overall      | 0.85 (0.13)                    | Naik et al. <sup>31</sup>            |
| Ovary                           | Overall      | 0.77 (0.17)                    | Pickard et al. <sup>33</sup>         |
| Colorectal                      | Initial:     | 0.760 (0.19)                   | Färkkilä et al. <sup>37</sup>        |
|                                 | Continuous:  | 0.835 (0.20)                   |                                      |
|                                 | End of Life: | 0.643 (0.26)                   |                                      |

**Supplementary Table 6.** Baseline medical costs, productivity loss, and patient time costs among US cancer patients aged 20 years or older, by cancer type

| Cancer type               | Sex    | Age | Medical costs |            |             | Productivity loss |            |             | Patient time cost |            |             |
|---------------------------|--------|-----|---------------|------------|-------------|-------------------|------------|-------------|-------------------|------------|-------------|
|                           |        |     | Initial       | Continuous | End-of-life | Initial           | Continuous | End-of-life | Initial           | Continuous | End-of-life |
| Esophageal Adenocarcinoma | Female | <65 | 95439         | 6853       | 156417      | 4884              | 3757       | 15027       | 650               | 500        | 2001        |
|                           |        | ≥65 | 79532         | 6853       | 104278      | 6984              | 5372       | 21489       | 1187              | 913        | 3652        |
|                           | Male   | <65 | 95787         | 6450       | 155612      | 4884              | 3757       | 15027       | 650               | 500        | 2001        |
|                           |        | ≥65 | 79822         | 6450       | 103742      | 6984              | 5372       | 21489       | 1187              | 913        | 3652        |
| Stomach (Gastric Cardia)  | Female | <65 | 85291         | 3977       | 155636      | 4884              | 3757       | 15027       | 650               | 500        | 2001        |
|                           |        | ≥65 | 71076         | 3977       | 103758      | 6984              | 5372       | 21489       | 1187              | 913        | 3652        |
|                           | Male   | <65 | 94144         | 4282       | 160695      | 4884              | 3757       | 15027       | 650               | 500        | 2001        |
|                           |        | ≥65 | 78453         | 4282       | 107130      | 6984              | 5372       | 21489       | 1187              | 913        | 3652        |
| Liver                     | Female | <65 | 40173         | 5859       | 95782       | 4884              | 3757       | 15027       | 650               | 500        | 2001        |
|                           |        | ≥65 | 40173         | 5859       | 95782       | 6984              | 5372       | 21489       | 1187              | 913        | 3652        |
|                           | Male   | <65 | 41161         | 7363       | 97473       | 4884              | 3757       | 15027       | 650               | 500        | 2001        |
|                           |        | ≥65 | 41161         | 7363       | 97473       | 6984              | 5372       | 21489       | 1187              | 913        | 3652        |
| Pancreatic                | Female | <65 | 112154        | 8672       | 164911      | 4884              | 3757       | 15027       | 650               | 500        | 2001        |
|                           |        | ≥65 | 93462         | 8672       | 109941      | 6984              | 5372       | 21489       | 1187              | 913        | 3652        |
|                           | Male   | <65 | 112911        | 11697      | 169673      | 4884              | 3757       | 15027       | 650               | 500        | 2001        |
|                           |        | ≥65 | 94092         | 11697      | 113115      | 6984              | 5372       | 21489       | 1187              | 913        | 3652        |
| Advanced Prostate         | Male   | <65 | 23652         | 3201       | 93363       | 3715              | 2858       | 11432       | 650               | 500        | 2001        |
|                           |        | ≥65 | 19710         | 3201       | 62242       | 6549              | 5038       | 20152       | 1187              | 913        | 3652        |
| Colorectal                | Female | <65 | 61593         | 3159       | 126778      | 10330             | 7946       | 31784       | 650               | 500        | 2001        |
|                           |        | ≥65 | 51327         | 3159       | 84519       | 7479              | 5753       | 23012       | 1187              | 913        | 3652        |

|    |                         |        |     |       |      |        |       |      |       |      |     |      |
|----|-------------------------|--------|-----|-------|------|--------|-------|------|-------|------|-----|------|
| 1  |                         |        |     |       |      |        |       |      |       |      |     |      |
| 2  |                         | Male   | <65 | 62174 | 4595 | 128507 | 10330 | 7946 | 31784 | 650  | 500 | 2001 |
| 3  |                         |        | ≥65 | 51812 | 4595 | 85671  | 7479  | 5753 | 23012 | 1187 | 913 | 3652 |
| 4  |                         |        |     |       |      |        |       |      |       |      |     |      |
| 5  |                         |        |     |       |      |        |       |      |       |      |     |      |
| 6  | Endometrial             | Female | <65 | 32129 | 1535 | 105262 | 4884  | 3757 | 15027 | 650  | 500 | 2001 |
| 7  |                         |        | ≥65 | 26775 | 1535 | 70175  | 6984  | 5372 | 21489 | 1187 | 913 | 3652 |
| 8  |                         |        |     |       |      |        |       |      |       |      |     |      |
| 9  |                         |        |     |       |      |        |       |      |       |      |     |      |
| 10 | Ovarian                 | Female | <65 | 98788 | 8296 | 149573 | 4884  | 3757 | 15027 | 650  | 500 | 2001 |
| 11 |                         |        | ≥65 | 82324 | 8296 | 99715  | 6984  | 5372 | 21489 | 1187 | 913 | 3652 |
| 12 |                         |        |     |       |      |        |       |      |       |      |     |      |
| 13 |                         |        |     |       |      |        |       |      |       |      |     |      |
| 14 | Gallbladder             | Female | <65 | 40173 | 5859 | 95782  | 4884  | 3757 | 15027 | 650  | 500 | 2001 |
| 15 |                         |        | ≥65 | 40173 | 5859 | 95782  | 6984  | 5372 | 21489 | 1187 | 913 | 3652 |
| 16 |                         | Male   | <65 | 41161 | 7363 | 97473  | 4884  | 3757 | 15027 | 650  | 500 | 2001 |
| 17 |                         |        | ≥65 | 41161 | 7363 | 97473  | 6984  | 5372 | 21489 | 1187 | 913 | 3652 |
| 18 |                         |        |     |       |      |        |       |      |       |      |     |      |
| 19 |                         |        |     |       |      |        |       |      |       |      |     |      |
| 20 |                         |        |     |       |      |        |       |      |       |      |     |      |
| 21 | Kidney (Renal Cell)     | Female | <65 | 46077 | 6255 | 110765 | 4884  | 3757 | 15027 | 650  | 500 | 2001 |
| 22 |                         |        | ≥65 | 38397 | 6255 | 73843  | 6984  | 5372 | 21489 | 1187 | 913 | 3652 |
| 23 |                         | Male   | <65 | 46048 | 6018 | 117123 | 4884  | 3757 | 15027 | 650  | 500 | 2001 |
| 24 |                         |        | ≥65 | 38374 | 6018 | 78082  | 6984  | 5372 | 21489 | 1187 | 913 | 3652 |
| 25 |                         |        |     |       |      |        |       |      |       |      |     |      |
| 26 |                         |        |     |       |      |        |       |      |       |      |     |      |
| 27 |                         |        |     |       |      |        |       |      |       |      |     |      |
| 28 | Breast (Postmenopausal) | Female | <65 | 27693 | 2207 | 94284  | 5985  | 4604 | 18416 | 650  | 500 | 2001 |
| 29 |                         |        | ≥65 | 23078 | 2207 | 62856  | 4752  | 3655 | 14620 | 1187 | 913 | 3652 |
| 30 |                         |        |     |       |      |        |       |      |       |      |     |      |
| 31 |                         |        |     |       |      |        |       |      |       |      |     |      |
| 32 | Thyroid                 | Female | <65 | 40173 | 5859 | 95782  | 4884  | 3757 | 15027 | 650  | 500 | 2001 |
| 33 |                         |        | ≥65 | 40173 | 5859 | 95782  | 6984  | 5372 | 21489 | 1187 | 913 | 3652 |
| 34 |                         | Male   | <65 | 41161 | 7363 | 97473  | 4884  | 3757 | 15027 | 650  | 500 | 2001 |
| 35 |                         |        | ≥65 | 41161 | 7363 | 97473  | 6984  | 5372 | 21489 | 1187 | 913 | 3652 |
| 36 |                         |        |     |       |      |        |       |      |       |      |     |      |
| 37 |                         |        |     |       |      |        |       |      |       |      |     |      |
| 38 |                         |        |     |       |      |        |       |      |       |      |     |      |
| 39 | Multiple Myeloma        | Female | <65 | 40173 | 5859 | 95782  | 4884  | 3757 | 15027 | 650  | 500 | 2001 |
| 40 |                         |        | ≥65 | 40173 | 5859 | 95782  | 6984  | 5372 | 21489 | 1187 | 913 | 3652 |
| 41 |                         |        |     |       |      |        |       |      |       |      |     |      |
| 42 |                         |        |     |       |      |        |       |      |       |      |     |      |
| 43 |                         |        |     |       |      |        |       |      |       |      |     |      |
| 44 |                         |        |     |       |      |        |       |      |       |      |     |      |
| 45 |                         |        |     |       |      |        |       |      |       |      |     |      |
| 46 |                         |        |     |       |      |        |       |      |       |      |     |      |
| 47 |                         |        |     |       |      |        |       |      |       |      |     |      |

1  
2  
3  
4  
5  
6  
7  
8  
9  
10  
11  
12  
13  
14  
15  
16  
17  
18  
19  
20  
21  
22  
23  
24  
25  
26  
27  
28  
29  
30  
31  
32  
33  
34  
35  
36  
37  
38  
39  
40  
41  
42  
43  
44  
45  
46  
47

|      |     |       |      |       |      |      |       |      |     |      |
|------|-----|-------|------|-------|------|------|-------|------|-----|------|
| Male | <65 | 41161 | 7363 | 97473 | 4884 | 3757 | 15027 | 650  | 500 | 2001 |
|      | ≥65 | 41161 | 7363 | 97473 | 6984 | 5372 | 21489 | 1187 | 913 | 3652 |

---

For peer review only

**Supplementary Table 7.** Baseline medical costs, productivity loss, and patient time cost among general population aged 20 years or older in the US, by 32 subgroups

| Age group, years | Sex    | Race/ethnicity | Medical costs        |                   | Productivity loss    |                   | Patient time cost    |                   |
|------------------|--------|----------------|----------------------|-------------------|----------------------|-------------------|----------------------|-------------------|
|                  |        |                | Annual general costs | End-of-life costs | Annual general costs | End-of-life costs | Annual general costs | End-of-life costs |
| 20-44            | Female | NHW            | 4020                 | 40000             | 2040                 | 8160              | 226                  | 904               |
|                  |        | NHB            | 3100                 | 40000             | 2040                 | 8160              | 226                  | 904               |
|                  |        | Hispanic       | 2355                 | 40000             | 2040                 | 8160              | 226                  | 904               |
|                  |        | Other          | 2617                 | 40000             | 2040                 | 8160              | 226                  | 904               |
|                  | Male   | NHW            | 2022                 | 40000             | 2040                 | 8160              | 226                  | 904               |
|                  |        | NHB            | 2279                 | 40000             | 2040                 | 8160              | 226                  | 904               |
|                  |        | Hispanic       | 1145                 | 40000             | 2040                 | 8160              | 226                  | 904               |
|                  |        | Other          | 1803                 | 40000             | 2040                 | 8160              | 226                  | 904               |
| 45-54            | Female | NHW            | 5371                 | 40000             | 2040                 | 8160              | 226                  | 904               |
|                  |        | NHB            | 5712                 | 40000             | 2040                 | 8160              | 226                  | 904               |
|                  |        | Hispanic       | 3196                 | 40000             | 2040                 | 8160              | 226                  | 904               |
|                  |        | Other          | 4082                 | 40000             | 2040                 | 8160              | 226                  | 904               |
|                  | Male   | NHW            | 3812                 | 40000             | 2040                 | 8160              | 226                  | 904               |
|                  |        | NHB            | 3639                 | 40000             | 2040                 | 8160              | 226                  | 904               |
|                  |        | Hispanic       | 3612                 | 40000             | 2040                 | 8160              | 226                  | 904               |
|                  |        | Other          | 2560                 | 40000             | 2040                 | 8160              | 226                  | 904               |
| 55-64            | Female | NHW            | 7300                 | 40000             | 2040                 | 8160              | 226                  | 904               |
|                  |        | NHB            | 5479                 | 40000             | 2040                 | 8160              | 226                  | 904               |
|                  |        | Hispanic       | 4607                 | 40000             | 2040                 | 8160              | 226                  | 904               |
|                  |        | Other          | 3951                 | 40000             | 2040                 | 8160              | 226                  | 904               |
|                  | Male   | NHW            | 6519                 | 40000             | 2040                 | 8160              | 226                  | 904               |
|                  |        | NHB            | 6455                 | 40000             | 2040                 | 8160              | 226                  | 904               |
|                  |        | Hispanic       | 5077                 | 40000             | 2040                 | 8160              | 226                  | 904               |
|                  |        | Other          | 6320                 | 40000             | 2040                 | 8160              | 226                  | 904               |
| ≥65              | Female | NHW            | 8997                 | 40000             | 4409                 | 8160              | 607                  | 904               |
|                  |        | NHB            | 9585                 | 40000             | 4409                 | 8160              | 607                  | 904               |
|                  |        | Hispanic       | 8847                 | 40000             | 4409                 | 8160              | 607                  | 904               |
|                  |        | Other          | 8625                 | 40000             | 4409                 | 8160              | 607                  | 904               |
|                  | Male   | NHW            | 9334                 | 40000             | 4409                 | 8160              | 607                  | 904               |
|                  |        | NHB            | 7367                 | 40000             | 4409                 | 8160              | 607                  | 904               |
|                  |        | Hispanic       | 5640                 | 40000             | 4409                 | 8160              | 607                  | 904               |
|                  |        | Other          | 7461                 | 40000             | 4409                 | 8160              | 607                  | 904               |

**Supplementary Table 8.** Characteristics of US adults aged 20 years or older participated in the NHANES, 2013-2016

| Characteristics<br>(N=10064)                   | Calorie Consumption, kcal/day |
|------------------------------------------------|-------------------------------|
| <b>Age, years</b>                              | 47.8 ± 0.41                   |
| <b>Age groups, years, N (%)</b>                |                               |
| 20-44                                          | 4319 (44.5)      425 ± 4.38   |
| 25-54                                          | 1704 (18.3)      315 ± 5.39   |
| 55-64                                          | 1725 (17.3)      271 ± 4.90   |
| ≥65                                            | 2316 (19.9)      192 ± 3.83   |
| <b>Sex, N (%)</b>                              |                               |
| Male                                           | 4829 (48.3)      388 ± 4.53   |
| Female                                         | 5235 (51.7)      279 ± 4.04   |
| <b>Race/ethnicity, N (%)</b>                   |                               |
| Non-Hispanic White                             | 3944 (65.0)      320 ± 4.76   |
| Non-Hispanic Black                             | 2069 (11.2)      361 ± 6.55   |
| Hispanic                                       | 2668 (14.9)      367 ± 4.44   |
| Other                                          | 1383 (8.90)      325 ± 8.12   |
| <b>Education, N (%)</b>                        |                               |
| Less than high school graduate                 | 2178 (14.2)      311 ± 5.14   |
| High school graduate                           | 2249 (21.6)      332 ± 5.72   |
| Some college                                   | 3070 (33.1)      341 ± 4.92   |
| College graduate                               | 2562 (31.0)      332 ± 7.10   |
| <b>Family income to poverty ratio, N (%)</b>   |                               |
| <1.30                                          | 3862 (28.3)      325 ± 4.87   |
| 1.30-1.84                                      | 2842 (26.7)      333 ± 4.55   |
| 1.85-2.99                                      | 1725 (20.4)      344 ± 6.73   |
| ≥3.00                                          | 1635 (24.5)      328 ± 7.01   |
| <b>Body mass index (BMI), kg/m<sup>2</sup></b> | 29.3 ± 0.16                   |
| <b>Weight status, N (%)</b>                    |                               |
| Underweight (BMI<18.5)                         | 145 (1.36)      341 ± 17.5    |
| Normal weight (BMI=18.5-24.9)                  | 2671 (27.2)      327 ± 4.81   |
| Overweight/Obese (BMI≥25)                      | 7163 (71.4)      334 ± 4.01   |

**Supplementary Table 9.** Consumption of calories from full-service and fast-food restaurants among US adults participated in 2013-2016 NHANES by 32 subgroups

| Age group, years | Sex    | Race/ethnicity | Baseline consumption,<br>kcal/day<br>(mean ± SE) |
|------------------|--------|----------------|--------------------------------------------------|
| 20-44            | Female | NHW            | 357 ± 6.47                                       |
|                  |        | NHB            | 397 ± 8.98                                       |
|                  |        | Hispanic       | 364 ± 6.77                                       |
|                  |        | Other          | 334 ± 11.3                                       |
|                  | Male   | NHW            | 485 ± 9.00                                       |
|                  |        | NHB            | 508 ± 12.3                                       |
|                  |        | Hispanic       | 500 ± 13.7                                       |
|                  |        | Other          | 466 ± 14.1                                       |
| 45-54            | Female | NHW            | 270 ± 9.38                                       |
|                  |        | NHB            | 266 ± 7.85                                       |
|                  |        | Hispanic       | 265 ± 9.11                                       |
|                  |        | Other          | 228 ± 14.6                                       |
|                  | Male   | NHW            | 374 ± 11.3                                       |
|                  |        | NHB            | 388 ± 17.4                                       |
|                  |        | Hispanic       | 355 ± 15.0                                       |
|                  |        | Other          | 338 ± 20.2                                       |
| 55-64            | Female | NHW            | 231 ± 5.25                                       |
|                  |        | NHB            | 249 ± 9.58                                       |
|                  |        | Hispanic       | 234 ± 7.99                                       |
|                  |        | Other          | 216 ± 10.2                                       |
|                  | Male   | NHW            | 315 ± 9.55                                       |
|                  |        | NHB            | 314 ± 18.3                                       |
|                  |        | Hispanic       | 307 ± 9.90                                       |
|                  |        | Other          | 298 ± 11.1                                       |
| ≥65              | Female | NHW            | 164 ± 4.71                                       |
|                  |        | NHB            | 156 ± 6.07                                       |
|                  |        | Hispanic       | 158 ± 5.27                                       |
|                  | Male   | Other          | 137 ± 5.43                                       |
|                  |        | NHW            | 235 ± 7.43                                       |
|                  |        | NHB            | 220 ± 7.07                                       |
|                  |        | Hispanic       | 218 ± 8.07                                       |

1  
2  
3  
4  
5  
6  
7  
8  
9  
10  
11  
12  
13  
14  
15  
16  
17  
18  
19  
20  
21  
22  
23  
24  
25  
26  
27  
28  
29  
30  
31  
32  
33  
34  
35  
36  
37  
38  
39  
40  
41  
42  
43  
44  
45  
46  
47

Other

198 ± 20.0

---

For peer review only



**Supplementary Table 10.** Estimated new cancer cases averted by the federal menu calorie labeling in the US by age, sex, race/ethnicity, and cancer type, over lifetime (U.S. population=235,162,844)<sup>1</sup>

| Cancer Type                    | Policy Scenario           | 20-44 y                |      | 45-54 y                 |      | 55-64 y               |      | 65 + y               |      |
|--------------------------------|---------------------------|------------------------|------|-------------------------|------|-----------------------|------|----------------------|------|
|                                |                           | Female                 | Male | Female                  | Male | Female                | Male | Female               | Male |
| <b>Endometrial</b>             |                           |                        |      |                         |      |                       |      |                      |      |
| Age                            | <i>consumer behavior</i>  | 3300 (696 to 6090)     |      | 591 (-990 to 2160)      |      | 1140 (433 to 1940)    |      | 656 (107 to 1190)    |      |
|                                | <i>+industry response</i> | 5960 (3360 to 8890)    |      | 1340 (-208 to 2980)     |      | 1600 (928 to 2430)    |      | 926 (396 to 1460)    |      |
| Race/Ethnicity                 |                           |                        |      |                         |      |                       |      |                      |      |
| Non-Hispanic White             | <i>consumer behavior</i>  | 1630<br>(-711 to 4080) | 0    | -136<br>(-1590 to 1430) | 0    | 757<br>(140 to 1500)  | 0    | 572<br>(38 to 1070)  | 0    |
|                                | <i>+industry response</i> | 3080<br>(829 to 5780)  | 0    | 369<br>(-1100 to 1950)  | 0    | 1110<br>(463 to 1830) | 0    | 780<br>(245 to 1290) | 0    |
| Non-Hispanic Black             | <i>consumer behavior</i>  | 763<br>(-157 to 1710)  | 0    | 258<br>(-23 to 543)     | 0    | 283<br>(73 to 528)    | 0    | 47<br>(-43 to 150)   | 0    |
|                                | <i>+industry response</i> | 1240<br>(316 to 2200)  | 0    | 372<br>(93 to 668)      | 0    | 355<br>(146 to 604)   | 0    | 77<br>(-13 to 176)   | 0    |
| Hispanic                       | <i>consumer behavior</i>  | 910<br>(74 to 1790)    | 0    | 290<br>(-48 to 596)     | 0    | 42<br>(-83 to 185)    | 0    | 43<br>(-16 to 102)   | 0    |
|                                | <i>+industry response</i> | 1460<br>(580 to 2340)  | 0    | 399<br>(66 to 703)      | 0    | 89<br>(-35 to 233)    | 0    | 64<br>(5 to 122)     | 0    |
| Other                          | <i>consumer behavior</i>  | 19<br>(-312 to 402)    | 0    | 165<br>(41 to 319)      | 0    | 54<br>(3 to 109)      | 0    | -6<br>(-26 to 14)    | 0    |
|                                | <i>+industry response</i> | 150<br>(-174 to 546)   | 0    | 191<br>(68 to 344)      | 0    | 68<br>(18 to 124)     | 0    | 0<br>(-21 to 21)     | 0    |
| <b>Breast (Postmenopausal)</b> |                           |                        |      |                         |      |                       |      |                      |      |
| Age                            | <i>consumer behavior</i>  | 2530 (263 to 5040)     |      | 373 (-1070 to 1950)     |      | 1210 (480 to 2130)    |      | 742 (137 to 1380)    |      |
|                                | <i>+industry response</i> | 4670 (2330 to 7350)    |      | 1040 (-390 to 2680)     |      | 1710 (1010 to 2640)   |      | 1040 (433 to 1700)   |      |
| Race/Ethnicity                 |                           |                        |      |                         |      |                       |      |                      |      |
| Non-Hispanic White             | <i>consumer behavior</i>  | 1370<br>(-659 to 3750) | 0    | -224<br>(-1570 to 1210) | 0    | 832<br>(170 to 1670)  | 0    | 660<br>(57 to 1280)  | 0    |
|                                | <i>+industry response</i> | 2660<br>(490 to 5220)  | 0    | 234<br>(-1130 to 1770)  | 0    | 1200<br>(535 to 2040) | 0    | 902<br>(291 to 1570) | 0    |
| Non-Hispanic Black             | <i>consumer behavior</i>  | 567<br>(-110 to 1300)  | 0    | 182<br>(-34 to 431)     | 0    | 267<br>(89 to 487)    | 0    | 43<br>(-40 to 136)   | 0    |

|    |                            |                           |                      |                        |                      |                       |                      |                      |                    |                      |
|----|----------------------------|---------------------------|----------------------|------------------------|----------------------|-----------------------|----------------------|----------------------|--------------------|----------------------|
| 1  |                            | <i>+industry response</i> | 912<br>(240 to 1680) | 0                      | 271<br>(55 to 536)   | 0                     | 329<br>(149 to 554)  | 0                    | 71<br>(-13 to 166) | 0                    |
| 2  | Hispanic                   | <i>consumer behavior</i>  | 581<br>(44 to 1200)  | 0                      | 231<br>(-14 to 474)  | 0                     | 32.9<br>(-72 to 154) | 0                    | 42<br>(-12 to 100) | 0                    |
| 3  |                            |                           |                      |                        |                      |                       |                      |                      |                    |                      |
| 4  |                            | <i>+industry response</i> | 934<br>(368 to 1600) | 0                      | 312<br>(71 to 563)   | 0                     | 76<br>(-34 to 198)   | 0                    | 61<br>(6 to 123)   | 0                    |
| 5  | Other                      | <i>consumer behavior</i>  | 1<br>(-310 to 384)   | 0                      | 182<br>(40 to 353)   | 0                     | 74<br>(9 to 148)     | 0                    | -7<br>(-35 to 22)  | 0                    |
| 6  |                            |                           |                      |                        |                      |                       |                      |                      |                    |                      |
| 7  |                            | <i>+industry response</i> | 128<br>(-187 to 541) | 0                      | 210<br>(71 to 386)   | 0                     | 94<br>(29 to 170)    | 0                    | 1<br>(-27 to 31)   | 0                    |
| 8  |                            |                           |                      |                        |                      |                       |                      |                      |                    |                      |
| 9  |                            |                           |                      |                        |                      |                       |                      |                      |                    |                      |
| 10 |                            |                           |                      |                        |                      |                       |                      |                      |                    |                      |
| 11 | <b>Kidney (Renal Cell)</b> |                           |                      |                        |                      |                       |                      |                      |                    |                      |
| 12 |                            |                           |                      |                        |                      |                       |                      |                      |                    |                      |
| 13 | Age                        | <i>consumer behavior</i>  | 2930 (864 to 5040)   |                        | 581 (-364 to 1540)   |                       | 1180 (526 to 1810)   |                      | 428 (28 to 805)    |                      |
| 14 |                            | <i>+industry response</i> | 5240 (3110 to 7390)  |                        | 1230 (244 to 2210)   |                       | 1590 (941 to 2250)   |                      | 651 (248 to 1030)  |                      |
| 15 |                            |                           |                      |                        |                      |                       |                      |                      |                    |                      |
| 16 | Race/Ethnicity             |                           |                      |                        |                      |                       |                      |                      |                    |                      |
| 17 |                            | Non-                      |                      |                        |                      |                       |                      |                      |                    |                      |
| 18 | Hispanic White             | <i>consumer behavior</i>  | 338<br>(-137 to 844) | 1040<br>(-536 to 2790) | -42<br>(-332 to 273) | 53<br>(-791 to 884)   | 172<br>(34 to 339)   | 677<br>(88 to 1240)  | 147<br>(18 to 280) | 192<br>(-170 to 536) |
| 19 |                            | <i>+industry response</i> | 646<br>(173 to 1180) | 2020<br>(410 to 3750)  | 58<br>(-236 to 383)  | 379<br>(-452 to 1250) | 251<br>(109 to 420)  | 898<br>(326 to 1470) | 199<br>(72 to 335) | 320<br>(-35 to 661)  |
| 20 | Non-Hispanic Black         | <i>consumer behavior</i>  | 170<br>(-35 to 384)  | 88<br>(-454 to 620)    | 60<br>(-5 to 128)    | 136<br>(-96 to 410)   | 79<br>(26 to 139)    | 85<br>(-81 to 258)   | 13<br>(-12 to 40)  | 44<br>(9 to 79)      |
| 21 |                            | <i>+industry response</i> | 280<br>(69 to 502)   | 343<br>(-202 to 898)   | 87<br>(22 to 157)    | 203<br>(-30 to 475)   | 97<br>(43 to 157)    | 119<br>(-45 to 295)  | 21<br>(-4 to 48)   | 56<br>(22 to 90)     |
| 22 | Hispanic                   | <i>consumer behavior</i>  | 267<br>(21 to 527)   | 895<br>(-21 to 1920)   | 92<br>(-4 to 184)    | 230<br>(-25 to 503)   | 14<br>(-27 to 60)    | 94<br>(8 to 196)     | 15<br>(-6 to 36)   | 9<br>(-29 to 50)     |
| 23 |                            | <i>+industry response</i> | 425<br>(166 to 697)  | 1290<br>(371 to 2320)  | 123<br>(27 to 218)   | 305<br>(49 to 570)    | 29<br>(-12 to 76)    | 127<br>(41 to 232)   | 22<br>(2 to 44)    | 21<br>(-17 to 63)    |
| 24 | Other                      | <i>consumer behavior</i>  | 5<br>(-47 to 66)     | 75<br>(-103 to 274)    | 34<br>(12 to 59)     | 3<br>(-64 to 77)      | 13<br>(2 to 25)      | 33<br>(10 to 58)     | -1<br>(-6 to 4)    | 8<br>(-18 to 37)     |
| 25 |                            | <i>+industry response</i> | 27<br>(-26 to 89)    | 147<br>(-29 to 347)    | 38<br>(17 to 64)     | 17<br>(-52 to 91)     | 16<br>(5 to 28)      | 41<br>(19 to 67)     | 1<br>(-4 to 6)     | 11<br>(-15 to 40)    |
| 26 |                            |                           |                      |                        |                      |                       |                      |                      |                    |                      |
| 27 |                            |                           |                      |                        |                      |                       |                      |                      |                    |                      |
| 28 |                            |                           |                      |                        |                      |                       |                      |                      |                    |                      |
| 29 |                            |                           |                      |                        |                      |                       |                      |                      |                    |                      |
| 30 |                            |                           |                      |                        |                      |                       |                      |                      |                    |                      |
| 31 |                            |                           |                      |                        |                      |                       |                      |                      |                    |                      |
| 32 |                            |                           |                      |                        |                      |                       |                      |                      |                    |                      |
| 33 |                            |                           |                      |                        |                      |                       |                      |                      |                    |                      |
| 34 |                            |                           |                      |                        |                      |                       |                      |                      |                    |                      |
| 35 | <b>Liver</b>               |                           |                      |                        |                      |                       |                      |                      |                    |                      |
| 36 | Age                        | <i>consumer behavior</i>  | 3210 (1000 to 5540)  |                        | 701 (-200 to 1760)   |                       | 1000 (477 to 1580)   |                      | 275 (17 to 551)    |                      |
| 37 |                            | <i>+industry response</i> | 5560 (3130 to 8130)  |                        | 1340 (397 to 2480)   |                       | 1340 (804 to 1950)   |                      | 432 (174 to 719)   |                      |
| 38 |                            |                           |                      |                        |                      |                       |                      |                      |                    |                      |
| 39 | Race/Ethnicity             |                           |                      |                        |                      |                       |                      |                      |                    |                      |
| 40 |                            |                           |                      |                        |                      |                       |                      |                      |                    |                      |
| 41 |                            |                           |                      |                        |                      |                       |                      |                      |                    |                      |
| 42 |                            |                           |                      |                        |                      |                       |                      |                      |                    |                      |
| 43 |                            |                           |                      |                        |                      |                       |                      |                      |                    |                      |
| 44 |                            |                           |                      |                        |                      |                       |                      |                      |                    |                      |
| 45 |                            |                           |                      |                        |                      |                       |                      |                      |                    |                      |
| 46 |                            |                           |                      |                        |                      |                       |                      |                      |                    |                      |
| 47 |                            |                           |                      |                        |                      |                       |                      |                      |                    |                      |

|    |                    |                           |                    |                |                    |                |                  |               |                 |               |
|----|--------------------|---------------------------|--------------------|----------------|--------------------|----------------|------------------|---------------|-----------------|---------------|
| 1  | Non-Hispanic       | <i>consumer behavior</i>  | 170                | 1150           | 18                 | -82            | 113              | 520           | 75              | 116           |
| 2  | White              |                           | (-125 to 597)      | (-258 to 3130) | (-168 to 236)      | (-844 to 807)  | (36 to 227)      | (108 to 1020) | (6 to 155)      | (-110 to 365) |
| 3  |                    | <i>+industry response</i> | 367                | 2120           | 78                 | 215            | 159              | 668           | 100             | 198           |
| 4  |                    |                           | (53 to 855)        | (498 to 4300)  | (-105 to 319)      | (-537 to 1150) | (77 to 280)      | (287 to 1220) | (35 to 189)     | (-26 to 454)  |
| 5  | Non-Hispanic Black | <i>consumer behavior</i>  | 143                | 85             | 53                 | 213            | 51               | 118           | 7               | 37            |
| 6  |                    |                           | (-27 to 346)       | (-678 to 1050) | (2 to 120)         | (-146 to 705)  | (14 to 100)      | (-112 to 393) | (-7 to 26)      | (-4 to 88)    |
| 7  |                    | <i>+industry response</i> | 231                | 429            | 74                 | 306            | 63               | 163           | 12              | 52            |
| 8  |                    |                           | (53 to 458)        | (-312 to 1460) | (24 to 147)        | (-41 to 823)   | (28 to 115)      | (-58 to 447)  | (-2 to 32)      | (11 to 107)   |
| 9  | Hispanic           | <i>consumer behavior</i>  | 239                | 1150           | 99                 | 321            | 14               | 113           | 17              | 8             |
| 10 |                    |                           | (19 to 570)        | (93 to 2490)   | (3 to 215)         | (15 to 703)    | (-30 to 72)      | (19 to 233)   | (-5 to 41)      | (-33 to 54)   |
| 11 |                    | <i>+industry response</i> | 384                | 1600           | 132                | 409            | 31               | 150           | 25              | 20            |
| 12 |                    |                           | (132 to 756)       | (529 to 3050)  | (36 to 257)        | (106 to 820)   | (-13 to 90)      | (55 to 276)   | (3 to 50)       | (-19 to 70)   |
| 13 | Other              | <i>consumer behavior</i>  | 2                  | 99             | 38                 | -1             | 15               | 38            | 0               | 9             |
| 14 |                    |                           | (-56 to 82)        | (-125 to 379)  | (9 to 77)          | (-101 to 125)  | (0 to 34)        | (5 to 76)     | (-8 to 7)       | (-28 to 53)   |
| 15 |                    | <i>+industry response</i> | 26                 | 183            | 43                 | 18             | 19               | 48            | 2               | 14            |
| 16 |                    |                           | (-32 to 108)       | (-31 to 483)   | (15 to 85)         | (-80 to 152)   | (5 to 40)        | (17 to 91)    | (-5 to 10)      | (-23 to 59)   |
| 17 | <b>Pancreatic</b>  |                           |                    |                |                    |                |                  |               |                 |               |
| 18 | Age                | <i>consumer behavior</i>  | 764 (262 to 1340)  |                | 81.6 (-186 to 388) |                | 404 (193 to 651) |               | 148 (21 to 286) |               |
| 19 |                    | <i>+industry response</i> | 1350 (820 to 1990) |                | 269 (4 to 595)     |                | 540 (327 to 793) |               | 227 (96 to 370) |               |
| 20 | Race/Ethnicity     |                           |                    |                |                    |                |                  |               |                 |               |
| 21 | Non-Hispanic White | <i>consumer behavior</i>  | 121                | 247            | -48                | -16            | 87               | 218           | 63              | 58            |
| 22 |                    |                           | (-44 to 367)       | (-120 to 768)  | (-159 to 87)       | (-246 to 245)  | (26 to 175)      | (48 to 432)   | (3 to 131)      | (-54 to 189)  |
| 23 |                    | <i>+industry response</i> | 229                | 490            | -11                | 73             | 122              | 283           | 87              | 98            |
| 24 |                    |                           | (50 to 493)        | (99 to 1060)   | (-124 to 134)      | (-154 to 363)  | (56 to 218)      | (115 to 507)  | (27 to 163)     | (-12 to 238)  |
| 25 | Non-Hispanic Black | <i>consumer behavior</i>  | 60                 | 18             | 24                 | 30             | 32               | 19            | 5               | 10            |
| 26 |                    |                           | (-10 to 158)       | (-80 to 128)   | (-1 to 54)         | (-20 to 87)    | (9 to 63)        | (-16 to 62)   | (-6 to 19)      | (2 to 19)     |
| 27 |                    | <i>+industry response</i> | 98                 | 64             | 34                 | 44             | 39               | 27            | 9               | 13            |
| 28 |                    |                           | (21 to 207)        | (-36 to 184)   | (9 to 67)          | (-4 to 102)    | (17 to 72)       | (-9 to 70)    | (-2 to 23)      | (5 to 23)     |
| 29 | Hispanic           | <i>consumer behavior</i>  | 68                 | 194            | 26                 | 46             | 4                | 18            | 6               | 2             |
| 30 |                    |                           | (5 to 150)         | (13 to 422)    | (-4 to 60)         | (-5 to 105)    | (-11 to 22)      | (-3 to 44)    | (-2 to 14)      | (-8 to 12)    |
| 31 |                    | <i>+industry response</i> | 108                | 273            | 36                 | 63             | 10               | 26            | 8               | 5             |
| 32 |                    |                           | (40 to 201)        | (92 to 518)    | (7 to 70)          | (11 to 124)    | (-5 to 28)       | (6 to 53)     | (0 to 18)       | (-5 to 15)    |
| 33 | Other              | <i>consumer behavior</i>  | -2                 | 18             | 17                 | 0              | 8                | 10            | 0               | 2             |
| 34 |                    |                           | (-27 to 30)        | (-29 to 72)    | (4 to 33)          | (-20 to 23)    | (1 to 16)        | (3 to 19)     | (-4 to 3)       | (-6 to 13)    |
| 35 |                    | <i>+industry response</i> | 9                  | 36             | 19                 | 4              | 10               | 13            | 1               | 4             |
| 36 |                    |                           | (-17 to 43)        | (-9 to 94)     | (7 to 36)          | (-16 to 28)    | (3 to 18)        | (5 to 22)     | (-3 to 5)       | (-5 to 14)    |
| 37 |                    |                           |                    |                |                    |                |                  |               |                 |               |
| 38 |                    |                           |                    |                |                    |                |                  |               |                 |               |
| 39 |                    |                           |                    |                |                    |                |                  |               |                 |               |
| 40 |                    |                           |                    |                |                    |                |                  |               |                 |               |
| 41 |                    |                           |                    |                |                    |                |                  |               |                 |               |
| 42 |                    |                           |                    |                |                    |                |                  |               |                 |               |
| 43 |                    |                           |                    |                |                    |                |                  |               |                 |               |
| 44 |                    |                           |                    |                |                    |                |                  |               |                 |               |
| 45 |                    |                           |                    |                |                    |                |                  |               |                 |               |
| 46 |                    |                           |                    |                |                    |                |                  |               |                 |               |
| 47 |                    |                           |                    |                |                    |                |                  |               |                 |               |

| <b>Esophageal Adenocarcinoma</b> |                    |                           |  |                    |                    |                  |                   |                |                  |                |                  |
|----------------------------------|--------------------|---------------------------|--|--------------------|--------------------|------------------|-------------------|----------------|------------------|----------------|------------------|
| 3                                | Age                | <i>consumer behavior</i>  |  | 715 (43 to 1480)   | 92 (-296 to 501)   | 419 (136 to 719) | 128 (-60 to 309)  |                |                  |                |                  |
| 5                                |                    | <i>+industry response</i> |  | 1300 (602 to 2100) | 293 (-102 to 708)  | 556 (270 to 858) | 206 (20 to 390)   |                |                  |                |                  |
| 7                                | Race/Ethnicity     |                           |  |                    |                    |                  |                   |                |                  |                |                  |
| 8                                | Non-Hispanic White | <i>consumer behavior</i>  |  | 45 (-25 to 125)    | 406 (-228 to 1100) | -9 (-55 to 41)   | 26 (-368 to 419)  | 30 (7 to 58)   | 345 (64 to 630)  | 27 (5 to 50)   | 92 (-88 to 263)  |
| 10                               |                    | <i>+industry response</i> |  | 91 (17 to 179)     | 815 (174 to 1560)  | 7 (-40 to 60)    | 179 (-210 to 578) | 43 (20 to 73)  | 449 (174 to 739) | 35 (14 to 59)  | 155 (-17 to 330) |
| 11                               | Non-Hispanic Black | <i>consumer behavior</i>  |  | 10 (-2 to 22)      | 10 (-28 to 50)     | 3 (-1 to 8)      | 11 (-7 to 32)     | 5 (2 to 9)     | 67 (-7 to 22)    | 1 (-1 to 3)    | 4 (0 to 7)       |
| 13                               |                    | <i>+industry response</i> |  | 16 (4 to 29)       | 28 (-11 to 69)     | 5 (1 to 9)       | 16 (-2 to 37)     | 6 (3 to 11)    | 9 (-4 to 25)     | 1 (0 to 3)     | 5 (2 to 8)       |
| 14                               | Hispanic           | <i>consumer behavior</i>  |  | 28 (2 to 57)       | 196 (-2 to 414)    | 9 (-1 to 20)     | 46 (-7 to 112)    | 2 (-3 to 8)    | 24 (3 to 47)     | 2 (-1 to 4)    | 2 (-7 to 12)     |
| 16                               |                    | <i>+industry response</i> |  | 44 (17 to 76)      | 280 (80 to 504)    | 13 (2 to 24)     | 63 (7 to 130)     | 3 (-1 to 10)   | 32 (11 to 56)    | 3 (0 to 5)     | 4 (-4 to 15)     |
| 17                               | Other              | <i>consumer behavior</i>  |  | -1 (-10 to 11)     | 10 (-16 to 41)     | 6 (1 to 11)      | 0 (-12 to 13)     | 2 (0 to 5)     | 7 (2 to 12)      | 0 (-1 to 1)    | 2 (-4 to 8)      |
| 19                               |                    | <i>+industry response</i> |  | 3 (-6 to 15)       | 21 (-6 to 52)      | 75 (2 to 12)     | 2 (-10 to 15)     | 3 (1 to 6)     | 8 (4 to 13)      | 0 (-1 to 1)    | 2 (-3 to 9)      |
| 20                               |                    |                           |  |                    |                    |                  |                   |                |                  |                |                  |
| 25                               | <b>Colorectal</b>  |                           |  |                    |                    |                  |                   |                |                  |                |                  |
| 26                               | Age                | <i>consumer behavior</i>  |  | 584 (183 to 1090)  | 79 (-90 to 289)    | 251 (126 to 412) | 117 (19 to 224)   |                |                  |                |                  |
| 27                               |                    | <i>+industry response</i> |  | 1050 (605 to 1610) | 201 (23 to 426)    | 341 (209 to 514) | 175 (81 to 289)   |                |                  |                |                  |
| 28                               | Race/Ethnicity     |                           |  |                    |                    |                  |                   |                |                  |                |                  |
| 29                               | Non-Hispanic White | <i>consumer behavior</i>  |  | 67 (-51 to 261)    | 169 (-107 to 569)  | -35 (-106 to 64) | -17 (-151 to 163) | 52 (11 to 111) | 126 (21 to 262)  | 55 (11 to 115) | 44 (-36 to 129)  |
| 31                               |                    | <i>+industry response</i> |  | 144 (-2 to 382)    | 358 (40 to 790)    | -12 (-80 to 97)  | 38 (-99 to 233)   | 75 (30 to 146) | 168 (62 to 313)  | 73 (28 to 138) | 70 (-7 to 162)   |
| 32                               | Non-Hispanic Black | <i>consumer behavior</i>  |  | 31 (-9 to 88)      | 38 (-48 to 144)    | 11 (-1 to 29)    | 26 (-13 to 79)    | 19 (7 to 36)   | 14 (-17 to 49)   | 3 (-4 to 12)   | 8 (1 to 17)      |
| 33                               |                    | <i>+industry response</i> |  | 53 (9 to 119)      | 78 (-8 to 203)     | 17 (4 to 36)     | 36 (-2 to 91)     | 23 (11 to 41)  | 20 (-9 to 56)    | 6 (-1 to 15)   | 11 (3 to 21)     |
| 34                               | Hispanic           | <i>consumer behavior</i>  |  | 45 (2 to 113)      | 185 (25 to 409)    | 20 (1 to 43)     | 57 (9 to 114)     | 3 (-7 to 16)   | 21 (2 to 44)     | 4 (-1 to 11)   | 1 (-8 to 11)     |
| 35                               |                    |                           |  |                    |                    |                  |                   |                |                  |                |                  |
| 36                               |                    |                           |  |                    |                    |                  |                   |                |                  |                |                  |
| 37                               |                    |                           |  |                    |                    |                  |                   |                |                  |                |                  |
| 38                               |                    |                           |  |                    |                    |                  |                   |                |                  |                |                  |
| 39                               |                    |                           |  |                    |                    |                  |                   |                |                  |                |                  |
| 40                               |                    |                           |  |                    |                    |                  |                   |                |                  |                |                  |
| 41                               |                    |                           |  |                    |                    |                  |                   |                |                  |                |                  |
| 42                               |                    |                           |  |                    |                    |                  |                   |                |                  |                |                  |
| 43                               |                    |                           |  |                    |                    |                  |                   |                |                  |                |                  |
| 44                               |                    |                           |  |                    |                    |                  |                   |                |                  |                |                  |
| 45                               |                    |                           |  |                    |                    |                  |                   |                |                  |                |                  |
| 46                               |                    |                           |  |                    |                    |                  |                   |                |                  |                |                  |
| 47                               |                    |                           |  |                    |                    |                  |                   |                |                  |                |                  |

|    |                         |                           |                     |                     |                    |                    |                  |                    |                 |                   |  |
|----|-------------------------|---------------------------|---------------------|---------------------|--------------------|--------------------|------------------|--------------------|-----------------|-------------------|--|
| 1  |                         | <i>+industry response</i> | 73<br>(18 to 155)   | 256<br>(84 to 504)  | 26<br>(8 to 51)    | 70<br>(23 to 129)  | 6<br>(-3 to 20)  | 28<br>(10 to 53)   | 6<br>(1 to 13)  | 4<br>(-5 to 14)   |  |
| 2  | Other                   | <i>consumer behavior</i>  | -2<br>(-21 to 26)   | 20<br>(-31 to 89)   | 7<br>(-1 to 19)    | 1<br>(-20 to 26)   | 4<br>(0 to 11)   | 8<br>(1 to 16)     | -1<br>(-3 to 2) | 3<br>(-6 to 13)   |  |
| 3  |                         | <i>+industry response</i> | 6<br>(-13 to 36)    | 41<br>(-9 to 115)   | 9<br>(1 to 21)     | 5<br>(-15 to 31)   | 6<br>(1 to 12)   | 10<br>(4 to 19)    | 0<br>(-2 to 3)  | 4<br>(-5 to 14)   |  |
| 4  |                         |                           |                     |                     |                    |                    |                  |                    |                 |                   |  |
| 5  |                         |                           |                     |                     |                    |                    |                  |                    |                 |                   |  |
| 6  |                         |                           |                     |                     |                    |                    |                  |                    |                 |                   |  |
| 7  | <b>Thyroid</b>          |                           |                     |                     |                    |                    |                  |                    |                 |                   |  |
| 8  | Age                     | <i>consumer behavior</i>  | 374 (114 to 751)    |                     | 10 (-69 to 125)    |                    | 84 (44 to 144)   |                    | 34 (7 to 68)    |                   |  |
| 9  |                         | <i>+industry response</i> | 683 (349 to 1130)   |                     | 67 (-17 to 200)    |                    | 117 (70 to 187)  |                    | 52 (22 to 91)   |                   |  |
| 10 |                         |                           |                     |                     |                    |                    |                  |                    |                 |                   |  |
| 11 | Race/Ethnicity          |                           |                     |                     |                    |                    |                  |                    |                 |                   |  |
| 12 | Non-Hispanic White      | <i>consumer behavior</i>  | 96<br>(-59 to 382)  | 52<br>(-59 to 273)  | -28<br>(-85 to 56) | -15<br>(-64 to 58) | 21<br>(1 to 62)  | 28<br>(1 to 73)    | 20<br>(2 to 47) | 8<br>(-9 to 31)   |  |
| 13 |                         | <i>+industry response</i> | 205<br>(-15 to 563) | 131<br>(-26 to 395) | -8<br>(-63 to 92)  | 3<br>(-43 to 85)   | 33<br>(5 to 80)  | 40<br>(12 to 90)   | 28<br>(9 to 58) | 14<br>(-3 to 40)  |  |
| 14 | Non-Hispanic Black      | <i>consumer behavior</i>  | 29<br>(-10 to 113)  | 7<br>(-10 to 36)    | 8<br>(-1 to 24)    | 3<br>(-3 to 12)    | 12<br>(6 to 22)  | 2<br>(-2 to 8)     | 1<br>(-2 to 5)  | 1<br>(0 to 2)     |  |
| 15 |                         | <i>+industry response</i> | 52<br>(-1 to 153)   | 16<br>(-4 to 50)    | 12<br>(2 to 30)    | 5<br>(-1 to 15)    | 14<br>(8 to 26)  | 3<br>(-1 to 10)    | 2<br>(0 to 7)   | 2<br>(1 to 3)     |  |
| 16 | Hispanic                | <i>consumer behavior</i>  | 68<br>(1 to 201)    | 59<br>(6 to 151)    | 15<br>(-5 to 39)   | 13<br>(2 to 30)    | 2<br>(-4 to 12)  | 4<br>(0 to 9)      | 2<br>(-1 to 6)  | 0<br>(-1 to 3)    |  |
| 17 |                         | <i>+industry response</i> | 113<br>(22 to 276)  | 84<br>(26 to 189)   | 21<br>(2 to 48)    | 16<br>(6 to 35)    | 4<br>(-2 to 15)  | 5<br>(2 to 12)     | 3<br>(0 to 8)   | 1<br>(-1 to 3)    |  |
| 18 | Other                   | <i>consumer behavior</i>  | -4<br>(-38 to 59)   | 13<br>(-13 to 56)   | 6<br>(-4 to 20)    | 1<br>(-7 to 12)    | 5<br>(2 to 10)   | 5<br>(3 to 8)      | -1<br>(-2 to 1) | 0<br>(-2 to 3)    |  |
| 19 |                         | <i>+industry response</i> | 12<br>(-25 to 82)   | 23<br>(-2 to 70)    | 8<br>(-1 to 23)    | 3<br>(-5 to 14)    | 6<br>(3 to 11)   | 6<br>(4 to 9)      | 0<br>(-2 to 2)  | 1<br>(-1 to 4)    |  |
| 20 |                         |                           |                     |                     |                    |                    |                  |                    |                 |                   |  |
| 21 |                         |                           |                     |                     |                    |                    |                  |                    |                 |                   |  |
| 22 |                         |                           |                     |                     |                    |                    |                  |                    |                 |                   |  |
| 23 |                         |                           |                     |                     |                    |                    |                  |                    |                 |                   |  |
| 24 |                         |                           |                     |                     |                    |                    |                  |                    |                 |                   |  |
| 25 |                         |                           |                     |                     |                    |                    |                  |                    |                 |                   |  |
| 26 |                         |                           |                     |                     |                    |                    |                  |                    |                 |                   |  |
| 27 |                         |                           |                     |                     |                    |                    |                  |                    |                 |                   |  |
| 28 |                         |                           |                     |                     |                    |                    |                  |                    |                 |                   |  |
| 29 |                         |                           |                     |                     |                    |                    |                  |                    |                 |                   |  |
| 30 | <b>Multiple Myeloma</b> |                           |                     |                     |                    |                    |                  |                    |                 |                   |  |
| 31 | Age                     | <i>consumer behavior</i>  | 370 (113 to 743)    |                     | 78 (-46 to 242)    |                    | 181 (85 to 308)  |                    | 63 (7 to 128)   |                   |  |
| 32 |                         | <i>+industry response</i> | 653 (327 to 1120)   |                     | 164 (29 to 357)    |                    | 243 (142 to 385) |                    | 97 (41 to 169)  |                   |  |
| 33 |                         |                           |                     |                     |                    |                    |                  |                    |                 |                   |  |
| 34 | Race/Ethnicity          |                           |                     |                     |                    |                    |                  |                    |                 |                   |  |
| 35 | Non-Hispanic White      | <i>consumer behavior</i>  | 27<br>(-34 to 138)  | 102<br>(-61 to 375) | -14<br>(-50 to 50) | -4<br>(-96 to 139) | 24<br>(3 to 67)  | 96<br>(25 to 204)  | 20<br>(1 to 52) | 23<br>(-23 to 83) |  |
| 36 |                         | <i>+industry response</i> | 64<br>(-22 to 204)  | 207<br>(0 to 544)   | -1<br>(-38 to 74)  | 29<br>(-60 to 199) | 36<br>(9 to 87)  | 125<br>(52 to 246) | 28<br>(8 to 65) | 39<br>(-5 to 111) |  |
| 37 |                         |                           |                     |                     |                    |                    |                  |                    |                 |                   |  |
| 38 |                         |                           |                     |                     |                    |                    |                  |                    |                 |                   |  |
| 39 |                         |                           |                     |                     |                    |                    |                  |                    |                 |                   |  |
| 40 |                         |                           |                     |                     |                    |                    |                  |                    |                 |                   |  |
| 41 |                         |                           |                     |                     |                    |                    |                  |                    |                 |                   |  |
| 42 |                         |                           |                     |                     |                    |                    |                  |                    |                 |                   |  |
| 43 |                         |                           |                     |                     |                    |                    |                  |                    |                 |                   |  |
| 44 |                         |                           |                     |                     |                    |                    |                  |                    |                 |                   |  |
| 45 |                         |                           |                     |                     |                    |                    |                  |                    |                 |                   |  |
| 46 |                         |                           |                     |                     |                    |                    |                  |                    |                 |                   |  |
| 47 |                         |                           |                     |                     |                    |                    |                  |                    |                 |                   |  |

|    |                                 |                           |                   |                     |                   |                     |                  |                    |                 |                    |
|----|---------------------------------|---------------------------|-------------------|---------------------|-------------------|---------------------|------------------|--------------------|-----------------|--------------------|
| 1  | Non-Hispanic Black              | <i>consumer behavior</i>  | 39<br>(-9 to 135) | 22<br>(-63 to 178)  | 14<br>(-1 to 43)  | 27<br>(-15 to 95)   | 19<br>(4 to 45)  | 11<br>(-22 to 60)  | 4<br>(-4 to 17) | 10<br>(2 to 22)    |
| 2  |                                 | <i>+industry response</i> | 66<br>(1 to 183)  | 65<br>(-30 to 242)  | 22<br>(4 to 55)   | 38<br>(-3 to 113)   | 24<br>(9 to 54)  | 18<br>(-13 to 71)  | 6<br>(-1 to 20) | 13<br>(5 to 26)    |
| 3  | Hispanic                        | <i>consumer behavior</i>  | 26<br>(0 to 79)   | 111<br>(12 to 277)  | 7<br>(-5 to 24)   | 25<br>(-3 to 68)    | 2<br>(-4 to 11)  | 15<br>(3 to 32)    | 2<br>(-1 to 7)  | 0<br>(-5 to 7)     |
| 4  |                                 | <i>+industry response</i> | 43<br>(6 to 110)  | 154<br>(50 to 340)  | 10<br>(0 to 30)   | 33<br>(6 to 82)     | 4<br>(-2 to 15)  | 19<br>(8 to 39)    | 3<br>(0 to 9)   | 1<br>(-3 to 9)     |
| 5  | Other                           | <i>consumer behavior</i>  | 0<br>(-7 to 11)   | 8<br>(-11 to 41)    | 7<br>(3 to 12)    | 0<br>(-10 to 12)    | 1<br>(1 to 4)    | 4<br>(1 to 9)      | -0<br>(-1 to 1) | 1<br>(-3 to 6)     |
| 6  |                                 | <i>+industry response</i> | 2<br>(-4 to 16)   | 16<br>(-3 to 53)    | 8<br>(4 to 13)    | 1<br>(-8 to 15)     | 2<br>(0 to 5)    | 5<br>(2 to 11)     | 0<br>(-1 to 1)  | 1<br>(-2 to 6)     |
| 7  |                                 |                           |                   |                     |                   |                     |                  |                    |                 |                    |
| 8  | <b>Stomach (Gastric Cardia)</b> |                           |                   |                     |                   |                     |                  |                    |                 |                    |
| 9  | Age                             | <i>consumer behavior</i>  | 338 (49 to 803)   |                     | 58 (-99 to 264)   |                     | 182 (70 to 347)  |                    | 54 (-19 to 149) |                    |
| 10 |                                 | <i>+industry response</i> | 607 (241 to 1140) |                     | 141 (-20 to 378)  |                     | 240 (129 to 420) |                    | 86 (15 to 190)  |                    |
| 11 | Race/Ethnicity                  |                           |                   |                     |                   |                     |                  |                    |                 |                    |
| 12 | Non-Hispanic White              | <i>consumer behavior</i>  | 18<br>(-19 to 77) | 208<br>(-55 to 648) | -9<br>(-31 to 25) | 24<br>(-128 to 233) | 15<br>(4 to 37)  | 145<br>(35 to 304) | 14<br>(3 to 28) | 34<br>(-36 to 124) |
| 13 |                                 | <i>+industry response</i> | 43<br>(-6 to 117) | 380<br>(51 to 886)  | -1<br>(-24 to 38) | 86<br>(-67 to 322)  | 22<br>(9 to 47)  | 187<br>(77 to 364) | 18<br>(8 to 35) | 58<br>(-9 to 160)  |
| 14 | Non-Hispanic Black              | <i>consumer behavior</i>  | 7<br>(-2 to 21)   | 6<br>(-19 to 44)    | 2<br>(0 to 6)     | 7<br>(-5 to 24)     | 3<br>(1 to 7)    | 3<br>(-6 to 15)    | 0<br>(0 to 2)   | 3<br>(1 to 5)      |
| 15 |                                 | <i>+industry response</i> | 12<br>(2 to 28)   | 19<br>(-8 to 62)    | 3<br>(1 to 7)     | 10<br>(-2 to 29)    | 4<br>(2 to 8)    | 5<br>(-4 to 17)    | 1<br>(0 to 2)   | 3<br>(2 to 6)      |
| 16 | Hispanic                        | <i>consumer behavior</i>  | 15<br>(1 to 39)   | 63<br>(-7 to 170)   | 5<br>(0 to 13)    | 16<br>(-4 to 45)    | 1<br>(-2 to 5)   | 7<br>(0 to 18)     | 1<br>(0 to 3)   | 1<br>(-3 to 5)     |
| 17 |                                 | <i>+industry response</i> | 24<br>(6 to 52)   | 95<br>(21 to 214)   | 7<br>(2 to 16)    | 22<br>(3 to 54)     | 2<br>(-1 to 6)   | 10<br>(3 to 23)    | 1<br>(0 to 3)   | 2<br>(-2 to 7)     |
| 18 | Other                           | <i>consumer behavior</i>  | -1<br>(-7 to 10)  | 5<br>(-14 to 34)    | 5<br>(2 to 9)     | 0<br>(-8 to 12)     | 1<br>(0 to 3)    | 4<br>(1 to 9)      | 0<br>(-1 to 1)  | 1<br>(-3 to 6)     |
| 19 |                                 | <i>+industry response</i> | 2<br>(-5 to 14)   | 12<br>(-7 to 46)    | 6<br>(3 to 10)    | 2<br>(-6 to 15)     | 2<br>(0 to 4)    | 5<br>(2 to 10)     | 0<br>(-1 to 1)  | 2<br>(-2 to 7)     |
| 20 |                                 |                           |                   |                     |                   |                     |                  |                    |                 |                    |
| 21 | <b>Gallbladder</b>              |                           |                   |                     |                   |                     |                  |                    |                 |                    |
| 22 | Age                             | <i>consumer behavior</i>  | 161 (67 to 263)   |                     | 51 (8 to 100)     |                     | 76 (47 to 109)   |                    | 29 (11 to 51)   |                    |
| 23 |                                 | <i>+industry response</i> | 282 (181 to 396)  |                     | 86 (43 to 138)    |                     | 101 (73 to 137)  |                    | 44 (25 to 66)   |                    |
| 24 |                                 |                           |                   |                     |                   |                     |                  |                    |                 |                    |
| 25 |                                 |                           |                   |                     |                   |                     |                  |                    |                 |                    |
| 26 |                                 |                           |                   |                     |                   |                     |                  |                    |                 |                    |
| 27 |                                 |                           |                   |                     |                   |                     |                  |                    |                 |                    |
| 28 |                                 |                           |                   |                     |                   |                     |                  |                    |                 |                    |
| 29 |                                 |                           |                   |                     |                   |                     |                  |                    |                 |                    |
| 30 |                                 |                           |                   |                     |                   |                     |                  |                    |                 |                    |
| 31 |                                 |                           |                   |                     |                   |                     |                  |                    |                 |                    |
| 32 |                                 |                           |                   |                     |                   |                     |                  |                    |                 |                    |
| 33 |                                 |                           |                   |                     |                   |                     |                  |                    |                 |                    |
| 34 |                                 |                           |                   |                     |                   |                     |                  |                    |                 |                    |
| 35 |                                 |                           |                   |                     |                   |                     |                  |                    |                 |                    |
| 36 |                                 |                           |                   |                     |                   |                     |                  |                    |                 |                    |
| 37 |                                 |                           |                   |                     |                   |                     |                  |                    |                 |                    |
| 38 |                                 |                           |                   |                     |                   |                     |                  |                    |                 |                    |
| 39 |                                 |                           |                   |                     |                   |                     |                  |                    |                 |                    |
| 40 |                                 |                           |                   |                     |                   |                     |                  |                    |                 |                    |
| 41 |                                 |                           |                   |                     |                   |                     |                  |                    |                 |                    |
| 42 |                                 |                           |                   |                     |                   |                     |                  |                    |                 |                    |
| 43 |                                 |                           |                   |                     |                   |                     |                  |                    |                 |                    |
| 44 |                                 |                           |                   |                     |                   |                     |                  |                    |                 |                    |
| 45 |                                 |                           |                   |                     |                   |                     |                  |                    |                 |                    |
| 46 |                                 |                           |                   |                     |                   |                     |                  |                    |                 |                    |
| 47 |                                 |                           |                   |                     |                   |                     |                  |                    |                 |                    |

| Race/Ethnicity |                          |                  |                  |              |                 |              |                 |             |                |             |
|----------------|--------------------------|------------------|------------------|--------------|-----------------|--------------|-----------------|-------------|----------------|-------------|
| 1              | Non-                     |                  |                  |              |                 |              |                 |             |                |             |
| 2              | Hispanic                 | <i>consumer</i>  | 24               | 19           | 0               | 1.97         | 19              | 23          | 16             | 6           |
| 3              | White                    | <i>behavior</i>  | (-10 to 71)      | (-13 to 61)  | (-25 to 30)     | (-17 to 24)  | (5 to 38)       | (6 to 42)   | (3 to 31)      | (-5 to 17)  |
| 4              |                          | <i>+industry</i> | 47               | 39           | 9               | 9            | 27              | 29          | 21             | 9           |
| 5              |                          | <i>response</i>  | (10 to 99)       | (5 to 88)    | (-16 to 42)     | (-10 to 34)  | (12 to 48)      | (13 to 50)  | (8 to 37)      | (-1 to 21)  |
| 6              | Non-                     | <i>consumer</i>  | 27               | 2            | 11              | 6            | 14              | 4           | 2              | 2           |
| 7              | Hispanic Black           | <i>behavior</i>  | (-6 to 70)       | (-17 to 26)  | (0 to 24)       | (-4 to 18)   | (4 to 26)       | (-4 to 12)  | (-2 to 7)      | (0 to 4)    |
| 8              |                          | <i>+industry</i> | 45               | 11           | 15              | 9            | 17              | 5           | 4              | 3           |
| 9              |                          | <i>response</i>  | (11 to 93)       | (-8 to 38)   | (4 to 29)       | (-1 to 21)   | (8 to 30)       | (-2 to 14)  | (-1 to 9)      | (1 to 5)    |
| 10             | Hispanic                 | <i>consumer</i>  | 32               | 42           | 10              | 14           | 3               | 7           | 3              | 0           |
| 11             |                          | <i>behavior</i>  | (2 to 73)        | (-10 to 106) | (-4 to 26)      | (-2 to 34)   | (-5 to 11)      | (1 to 15)   | (-1 to 7)      | (-3 to 4)   |
| 12             |                          | <i>+industry</i> | 53               | 65           | 15              | 19           | 5               | 9           | 4              | 1           |
| 13             |                          | <i>response</i>  | (19 to 96)       | (11 to 130)  | (1 to 31)       | (3 to 39)    | (-2 to 14)      | (3 to 18)   | (1 to 9)       | (-2 to 5)   |
| 14             | Other                    | <i>consumer</i>  | 0                | 3            | 6               | 0            | 3               | 3           | 0              | 1           |
| 15             |                          | <i>behavior</i>  | (-11 to 18)      | (-6 to 15)   | (1 to 13)       | (-4 to 5)    | (0 to 7)        | (1 to 5)    | (-1 to 1)      | (-1 to 3)   |
| 16             |                          | <i>+industry</i> | 5                | 7            | 7               | 1            | 4               | 3           | 0              | 1           |
| 17             |                          | <i>response</i>  | (-7 to 24)       | (-2 to 19)   | (2 to 14)       | (-3 to 6)    | (1 to 8)        | (1 to 5)    | (-1 to 2)      | (-1 to 3)   |
| 18             | <b>Advanced Prostate</b> |                  |                  |              |                 |              |                 |             |                |             |
| 19             | <b>Prostate</b>          |                  |                  |              |                 |              |                 |             |                |             |
| 20             |                          | <i>consumer</i>  |                  |              |                 |              |                 |             |                |             |
| 21             | Age                      | <i>behavior</i>  | 163 (9 to 360)   |              | 37 (-54 to 146) |              | 106 (33 to 194) |             | 35 (-14 to 91) |             |
| 22             |                          | <i>+industry</i> |                  |              |                 |              |                 |             |                |             |
| 23             |                          | <i>response</i>  | 300 (130 to 507) |              | 85 (-6 to 203)  |              | 142 (67 to 240) |             | 56 (9 to 119)  |             |
| 24             | <b>Race/Ethnicity</b>    |                  |                  |              |                 |              |                 |             |                |             |
| 25             | Non-                     |                  |                  |              |                 |              |                 |             |                |             |
| 26             | Hispanic                 | <i>consumer</i>  |                  | 86           |                 | -1           |                 | 75          |                | 24          |
| 27             | White                    | <i>behavior</i>  | 0                | (-24 to 267) | 0               | (-80 to 98)  | 0               | (9 to 162)  | 0              | (-23 to 80) |
| 28             |                          | <i>+industry</i> | 0                | 162          | 0               | 30           | 0               | 100         | 0              | 40          |
| 29             |                          | <i>response</i>  |                  | (32 to 350)  |                 | (-48 to 144) |                 | (36 to 199) |                | (-5 to 102) |
| 30             | Non-                     | <i>consumer</i>  | 0                | 3            | 0               | 21           | 0               | 16          | 0              | 8           |
| 31             | Hispanic Black           | <i>behavior</i>  |                  | (-61 to 97)  |                 | (-17 to 69)  |                 | (-13 to 51) |                | (2 to 17)   |
| 32             |                          | <i>+industry</i> | 0                | 34           | 0               | 31           | 0               | 22          | 0              | 11          |
| 33             |                          | <i>response</i>  |                  | (-33 to 145) |                 | (-5 to 83)   |                 | (-7 to 57)  |                | (4 to 20)   |
| 34             | Hispanic                 | <i>consumer</i>  | 0                | 59           | 0               | 13           | 0               | 9           | 0              | 1           |
| 35             |                          | <i>behavior</i>  |                  | (8 to 133)   |                 | (-3 to 37)   |                 | (2 to 20)   |                | (-3 to 5)   |
| 36             |                          | <i>+industry</i> | 0                | 82           | 0               | 18           | 0               | 12          | 0              | 2           |
| 37             |                          | <i>response</i>  |                  | (28 to 163)  |                 | (1 to 44)    |                 | (5 to 23)   |                | (-2 to 7)   |
| 38             | Other                    | <i>consumer</i>  | 0                | 3            | 0               | 0            | 0               | 4           | 0              | 1           |
| 39             |                          | <i>behavior</i>  |                  | (-10 to 21)  |                 | (-7 to 8)    |                 | (2 to 8)    |                | (-3 to 5)   |
| 40             |                          | <i>+industry</i> | 0                | 8            | 0               | 1            | 0               | 5           | 0              | 2           |
| 41             |                          | <i>response</i>  |                  | (-5 to 28)   |                 | (-5 to 9)    |                 | (3 to 9)    |                | (-2 to 6)   |

| <b>Ovarian</b> |                    |                           |                 |   |                |   |               |   |               |
|----------------|--------------------|---------------------------|-----------------|---|----------------|---|---------------|---|---------------|
| 1              | Age                | <i>consumer behavior</i>  | 66 (-10 to 180) |   | 16 (-20 to 75) |   | 31 (11 to 69) |   | 28 (11 to 61) |
| 2              |                    | <i>+industry response</i> | 129 (16 to 277) |   | 33 (-6 to 102) |   | 45 (17 to 87) |   | 37 (19 to 75) |
| 3              | Race/Ethnicity     |                           |                 |   |                |   |               |   |               |
| 4              | Non-Hispanic White | <i>consumer behavior</i>  | 34 (-25 to 147) | 0 | -4 (-38 to 54) | 0 | 20 (2 to 55)  | 0 | 25 (8 to 57)  |
| 5              |                    | <i>+industry response</i> | 71 (-23 to 220) | 0 | 7 (-30 to 72)  | 0 | 30 (6 to 71)  | 0 | 32 (15 to 70) |
| 6              | Non-Hispanic Black | <i>consumer behavior</i>  | 11 (-5 to 41)   | 0 | 4 (0 to 13)    | 0 | 6 (3 to 13)   | 0 | 1 (-1 to 5)   |
| 7              |                    | <i>+industry response</i> | 19 (-3 to 56)   | 0 | 6 (0 to 17)    | 0 | 8 (4 to 16)   | 0 | 2 (0 to 6)    |
| 8              | Hispanic           | <i>consumer behavior</i>  | 21 (-2 to 67)   | 0 | 8 (-1 to 21)   | 0 | 1 (-3 to 8)   | 0 | 1 (-1 to 5)   |
| 9              |                    | <i>+industry response</i> | 34 (1 to 91)    | 0 | 11 (3 to 26)   | 0 | 3 (-1 to 10)  | 0 | 2 (0 to 6)    |
| 10             | Other              | <i>consumer behavior</i>  | -8 (-19 to 13)  | 0 | 6 (2 to 13)    | 0 | 2 (1 to 5)    | 0 | 0 (-1 to 1)   |
| 11             |                    | <i>+industry response</i> | -3 (-15 to 21)  | 0 | 7 (3 to 14)    | 0 | 3 (1 to 6)    | 0 | 0 (-1 to 2)   |

1. Values are the median estimates (95% uncertainty intervals) of each distribution of 1000 simulations.

For peer review only



**Supplementary Table 11.** Estimated cancer deaths reduced by the federal menu calorie labeling in the US by age, sex, race/ethnicity, and cancer type, over a lifetime (U.S. population=235,162,844)<sup>1</sup>

| Cancer Type                    | Policy Scenario           | 20-44 y                |                        | 45-54 y              |                       | 55-64 y             |                      | 65 + y             |                     |  |
|--------------------------------|---------------------------|------------------------|------------------------|----------------------|-----------------------|---------------------|----------------------|--------------------|---------------------|--|
|                                |                           | Female                 | Male                   | Female               | Male                  | Female              | Male                 | Female             | Male                |  |
| <b>Breast (Postmenopausal)</b> |                           |                        |                        |                      |                       |                     |                      |                    |                     |  |
| Age                            | <i>consumer behavior</i>  | 2490 (260 to 4980)     |                        | 151 (-204 to 521)    |                       | 285 (129 to 479)    |                      | 126 (30 to 227)    |                     |  |
|                                | <i>+industry response</i> | 4610 (2290 to 7240)    |                        | 336 (-26 to 725)     |                       | 396 (237 to 598)    |                      | 178 (82 to 284)    |                     |  |
| Race/Ethnicity                 |                           |                        |                        |                      |                       |                     |                      |                    |                     |  |
| Non-Hispanic White             | <i>consumer behavior</i>  | 1350<br>(-652 to 3690) | 0                      | -55<br>(-373 to 278) | 0                     | 165<br>(33 to 327)  | 0                    | 103<br>(10 to 204) | 0                   |  |
|                                | <i>+industry response</i> | 2620<br>(480 to 5150)  | 0                      | 54<br>(-264 to 419)  | 0                     | 238<br>(105 to 401) | 0                    | 139<br>(47 to 244) | 0                   |  |
| Non-Hispanic Black             | <i>consumer behavior</i>  | 560<br>(-109 to 1280)  | 0                      | 85<br>(-11 to 200)   | 0                     | 95<br>(32 to 173)   | 0                    | 13<br>(-12 to 40)  | 0                   |  |
|                                | <i>+industry response</i> | 901<br>(238 to 1660)   | 0                      | 126<br>(26 to 247)   | 0                     | 117<br>(53 to 196)  | 0                    | 21<br>(-4 to 49)   | 0                   |  |
| Hispanic                       | <i>consumer behavior</i>  | 572<br>(45 to 1180)    | 0                      | 76<br>(-7 to 163)    | 0                     | 9<br>(-21 to 44)    | 0                    | 10<br>(-3 to 24)   | 0                   |  |
|                                | <i>+industry response</i> | 922<br>(364 to 1570)   | 0                      | 104<br>(21 to 193)   | 0                     | 21<br>(-9 to 57)    | 0                    | 15<br>(2 to 30)    | 0                   |  |
| Other                          | <i>consumer behavior</i>  | 0<br>(-306 to 378)     | 0                      | 39<br>(9 to 76)      | 0                     | 15<br>(2 to 31)     | 0                    | -1<br>(-6 to 3)    | 0                   |  |
|                                | <i>+industry response</i> | 125<br>(-185 to 532)   | 0                      | 45<br>(16 to 84)     | 0                     | 19<br>(6 to 35)     | 0                    | 0<br>(-5 to 5)     | 0                   |  |
| <b>Liver</b>                   |                           |                        |                        |                      |                       |                     |                      |                    |                     |  |
| Age                            | <i>consumer behavior</i>  | 2840 (897 to 4890)     |                        | 628 (-181 to 1570)   |                       | 852 (411 to 1340)   |                      | 227 (18 to 455)    |                     |  |
|                                | <i>+industry response</i> | 4900 (2760 to 7190)    |                        | 1200 (345 to 2210)   |                       | 1140 (689 to 1650)  |                      | 357 (146 to 587)   |                     |  |
| Race/Ethnicity                 |                           |                        |                        |                      |                       |                     |                      |                    |                     |  |
| Non-Hispanic White             | <i>consumer behavior</i>  | 139<br>(-108 to 504)   | 1040<br>(-237 to 2780) | 15<br>(-147 to 207)  | -70<br>(-749 to 722)  | 98<br>(31 to 196)   | 440<br>(93 to 858)   | 63<br>(6 to 130)   | 97<br>(-88 to 297)  |  |
|                                | <i>+industry response</i> | 310<br>(42 to 719)     | 1900<br>(449 to 3830)  | 67<br>(-93 to 276)   | 199<br>(-478 to 1040) | 137<br>(67 to 240)  | 565<br>(241 to 1020) | 85<br>(30 to 159)  | 161<br>(-18 to 369) |  |

|    |                            |                           |                       |                       |                      |                      |                     |                     |                    |                   |
|----|----------------------------|---------------------------|-----------------------|-----------------------|----------------------|----------------------|---------------------|---------------------|--------------------|-------------------|
| 1  | Non-Hispanic Black         | <i>consumer behavior</i>  | 134<br>(-25 to 317)   | 72<br>(-601 to 932)   | 49<br>(3 to 110)     | 193<br>(-133 to 632) | 43<br>(12 to 85)    | 100<br>(-95 to 336) | 6<br>(-6 to 22)    | 29<br>(-4 to 69)  |
| 2  |                            | <i>+industry response</i> | 214<br>(51 to 425)    | 382<br>(-273 to 1280) | 68<br>(23 to 133)    | 276<br>(-37 to 729)  | 54<br>(24 to 97)    | 139<br>(-49 to 377) | 10<br>(-2 to 27)   | 41<br>(8 to 83)   |
| 3  | Hispanic                   | <i>consumer behavior</i>  | 199<br>(17 to 473)    | 1020<br>(88 to 2210)  | 87<br>(2 to 189)     | 285<br>(13 to 630)   | 12<br>(-26 to 62)   | 99<br>(18 to 201)   | 15<br>(-4 to 35)   | 6<br>(-28 to 46)  |
| 4  |                            | <i>+industry response</i> | 316<br>(111 to 623)   | 1430<br>(482 to 2690) | 116<br>(31 to 223)   | 365<br>(94 to 729)   | 26<br>(-11 to 78)   | 131<br>(48 to 242)  | 21<br>(3 to 43)    | 17<br>(-15 to 59) |
| 5  | Other                      | <i>consumer behavior</i>  | 2<br>(-47 to 68)      | 90<br>(-110 to 339)   | 32<br>(7 to 65)      | -2<br>(-88 to 108)   | 12<br>(0 to 28)     | 30<br>(4 to 61)     | 0<br>(-6 to 6)     | 7<br>(-22 to 42)  |
| 6  |                            | <i>+industry response</i> | 22<br>(-28 to 93)     | 168<br>(-26 to 434)   | 36<br>(13 to 71)     | 15<br>(-70 to 130)   | 16<br>(4 to 32)     | 39<br>(14 to 74)    | 1<br>(-4 to 8)     | 11<br>(-18 to 46) |
| 7  |                            |                           |                       |                       |                      |                      |                     |                     |                    |                   |
| 8  | <b>Endometrial</b>         |                           |                       |                       |                      |                      |                     |                     |                    |                   |
| 9  | Age                        | <i>consumer behavior</i>  | 1190 (309 to 2140)    |                       | 251 (-248 to 785)    |                      | 394 (177 to 659)    |                     | 213 (51 to 378)    |                   |
| 10 |                            | <i>+industry response</i> | 2100 (1200 to 3110)   |                       | 512 (26 to 1060)     |                      | 548 (325 to 817)    |                     | 302 (139 to 472)   |                   |
| 11 | Race/Ethnicity             |                           |                       |                       |                      |                      |                     |                     |                    |                   |
| 12 | Non-Hispanic White         | <i>consumer behavior</i>  | 440<br>(-210 to 1170) | 0                     | -42<br>(-511 to 440) | 0                    | 206<br>(36 to 399)  | 0                   | 173<br>(13 to 319) | 0                 |
| 13 |                            | <i>+industry response</i> | 858<br>(218 to 1620)  | 0                     | 114<br>(-351 to 606) | 0                    | 298<br>(127 to 491) | 0                   | 234<br>(76 to 388) | 0                 |
| 14 | Non-Hispanic Black         | <i>consumer behavior</i>  | 412<br>(-90 to 937)   | 0                     | 139<br>(-9 to 293)   | 0                    | 157<br>(42 to 295)  | 0                   | 26<br>(-24 to 83)  | 0                 |
| 15 |                            | <i>+industry response</i> | 666<br>(177 to 1210)  | 0                     | 201<br>(51 to 361)   | 0                    | 195<br>(81 to 338)  | 0                   | 42<br>(-8 to 97)   | 0                 |
| 16 | Hispanic                   | <i>consumer behavior</i>  | 315<br>(22 to 645)    | 0                     | 105<br>(-22 to 222)  | 0                    | 16<br>(-33 to 70)   | 0                   | 19<br>(-7 to 44)   | 0                 |
| 17 |                            | <i>+industry response</i> | 505<br>(197 to 854)   | 0                     | 144<br>(21 to 261)   | 0                    | 34<br>(-14 to 89)   | 0                   | 28<br>(3 to 54)    | 0                 |
| 18 | Other                      | <i>consumer behavior</i>  | 8<br>(-99 to 139)     | 0                     | 51<br>(13 to 99)     | 0                    | 17<br>(1 to 36)     | 0                   | -3<br>(-10 to 5)   | 0                 |
| 19 |                            | <i>+industry response</i> | 50<br>(-56 to 187)    | 0                     | 58<br>(21 to 107)    | 0                    | 22<br>(6 to 41)     | 0                   | 0<br>(-8 to 7)     | 0                 |
| 20 |                            |                           |                       |                       |                      |                      |                     |                     |                    |                   |
| 21 | <b>Kidney (Renal Cell)</b> |                           |                       |                       |                      |                      |                     |                     |                    |                   |
| 22 | Age                        | <i>consumer behavior</i>  | 1050 (284 to 1830)    |                       | 263 (-153 to 695)    |                      | 506 (225 to 778)    |                     | 182 (20 to 338)    |                   |
| 23 |                            | <i>+industry response</i> | 1880 (1100 to 2680)   |                       | 539 (106 to 977)     |                      | 679 (402 to 954)    |                     | 276 (112 to 429)   |                   |
| 24 | Race/Ethnicity             |                           |                       |                       |                      |                      |                     |                     |                    |                   |
| 25 |                            |                           |                       |                       |                      |                      |                     |                     |                    |                   |
| 26 |                            |                           |                       |                       |                      |                      |                     |                     |                    |                   |
| 27 |                            |                           |                       |                       |                      |                      |                     |                     |                    |                   |
| 28 |                            |                           |                       |                       |                      |                      |                     |                     |                    |                   |
| 29 |                            |                           |                       |                       |                      |                      |                     |                     |                    |                   |
| 30 |                            |                           |                       |                       |                      |                      |                     |                     |                    |                   |
| 31 |                            |                           |                       |                       |                      |                      |                     |                     |                    |                   |
| 32 |                            |                           |                       |                       |                      |                      |                     |                     |                    |                   |
| 33 |                            |                           |                       |                       |                      |                      |                     |                     |                    |                   |
| 34 |                            |                           |                       |                       |                      |                      |                     |                     |                    |                   |
| 35 |                            |                           |                       |                       |                      |                      |                     |                     |                    |                   |
| 36 |                            |                           |                       |                       |                      |                      |                     |                     |                    |                   |
| 37 |                            |                           |                       |                       |                      |                      |                     |                     |                    |                   |
| 38 |                            |                           |                       |                       |                      |                      |                     |                     |                    |                   |
| 39 |                            |                           |                       |                       |                      |                      |                     |                     |                    |                   |
| 40 |                            |                           |                       |                       |                      |                      |                     |                     |                    |                   |
| 41 |                            |                           |                       |                       |                      |                      |                     |                     |                    |                   |
| 42 |                            |                           |                       |                       |                      |                      |                     |                     |                    |                   |
| 43 |                            |                           |                       |                       |                      |                      |                     |                     |                    |                   |
| 44 |                            |                           |                       |                       |                      |                      |                     |                     |                    |                   |
| 45 |                            |                           |                       |                       |                      |                      |                     |                     |                    |                   |
| 46 |                            |                           |                       |                       |                      |                      |                     |                     |                    |                   |
| 47 |                            |                           |                       |                       |                      |                      |                     |                     |                    |                   |

|    |                    |                           |                     |                      |                      |                      |                    |                     |                   |                     |
|----|--------------------|---------------------------|---------------------|----------------------|----------------------|----------------------|--------------------|---------------------|-------------------|---------------------|
| 1  | Non-Hispanic White | <i>consumer behavior</i>  | 57<br>(-23 to 159)  | 332<br>(-183 to 922) | -16<br>(-128 to 106) | 26<br>(-351 to 396)  | 72<br>(14 to 138)  | 287<br>(42 to 525)  | 66<br>(9 to 124)  | 81<br>(-68 to 219)  |
| 2  |                    |                           |                     |                      |                      |                      |                    |                     |                   |                     |
| 3  |                    | <i>+industry response</i> | 111<br>(27 to 224)  | 663<br>(123 to 1280) | 22<br>(-90 to 146)   | 168<br>(-199 to 552) | 105<br>(46 to 171) | 378<br>(138 to 623) | 89<br>(33 to 148) | 133<br>(-12 to 272) |
| 4  | Non-Hispanic Black | <i>consumer behavior</i>  | 67<br>(-16 to 162)  | 48<br>(-225 to 326)  | 24<br>(-2 to 53)     | 59<br>(-40 to 171)   | 30<br>(10 to 56)   | 35<br>(-32 to 106)  | 5<br>(-5 to 16)   | 16<br>(3 to 28)     |
| 5  |                    |                           |                     |                      |                      |                      |                    |                     |                   |                     |
| 6  |                    | <i>+industry response</i> | 113<br>(25 to 218)  | 174<br>(-96 to 461)  | 34<br>(9 to 64)      | 87<br>(-14 to 199)   | 37<br>(17 to 63)   | 49<br>(-17 to 121)  | 8<br>(-2 to 20)   | 20<br>(7 to 33)     |
| 7  | Hispanic           | <i>consumer behavior</i>  | 111<br>(9 to 229)   | 367<br>(0 to 792)    | 30<br>(-3 to 62)     | 118<br>(-15 to 261)  | 6<br>(-13 to 29)   | 47<br>(5 to 98)     | 7<br>(-2 to 17)   | 4<br>(-12 to 23)    |
| 8  |                    |                           |                     |                      |                      |                      |                    |                     |                   |                     |
| 9  |                    | <i>+industry response</i> | 177<br>(67 to 305)  | 522<br>(168 to 968)  | 40<br>(8 to 74)      | 157<br>(23 to 303)   | 13<br>(-5 to 36)   | 64<br>(22 to 116)   | 11<br>(1 to 21)   | 9<br>(-7 to 28)     |
| 10 | Other              | <i>consumer behavior</i>  | 3<br>(-23 to 34)    | 33<br>(-40 to 122)   | 15<br>(5 to 28)      | 0<br>(-28 to 33)     | 5<br>(1 to 11)     | 16<br>(5 to 29)     | -1<br>(-3 to 2)   | 4<br>(-8 to 17)     |
| 11 |                    |                           |                     |                      |                      |                      |                    |                     |                   |                     |
| 12 |                    | <i>+industry response</i> | 13<br>(-12 to 45)   | 63<br>(-10 to 156)   | 17<br>(7 to 30)      | 6<br>(-22 to 39)     | 6<br>(2 to 12)     | 20<br>(9 to 33)     | 0<br>(-2 to 3)    | 5<br>(-6 to 18)     |
| 13 |                    |                           |                     |                      |                      |                      |                    |                     |                   |                     |
| 14 |                    |                           |                     |                      |                      |                      |                    |                     |                   |                     |
| 15 |                    |                           |                     |                      |                      |                      |                    |                     |                   |                     |
| 16 |                    |                           |                     |                      |                      |                      |                    |                     |                   |                     |
| 17 | <b>Pancreatic</b>  |                           |                     |                      |                      |                      |                    |                     |                   |                     |
| 18 | Age                | <i>consumer behavior</i>  | 656 (220 to 1160)   |                      | 74 (-166 to 350)     |                      | 362 (175 to 581)   |                     | 131 (20 to 250)   |                     |
| 19 |                    |                           |                     |                      |                      |                      |                    |                     |                   |                     |
| 20 |                    | <i>+industry response</i> | 1160 (707 to 1730)  |                      | 243 (1 to 535)       |                      | 483 (293 to 708)   |                     | 199 (87 to 321)   |                     |
| 21 |                    |                           |                     |                      |                      |                      |                    |                     |                   |                     |
| 22 | Race/Ethnicity     |                           |                     |                      |                      |                      |                    |                     |                   |                     |
| 23 | Non-Hispanic White | <i>consumer behavior</i>  | 101<br>(-40 to 310) | 213<br>(-100 to 659) | -44<br>(-143 to 78)  | -13<br>(-216 to 221) | 79<br>(24 to 158)  | 193<br>(44 to 384)  | 56<br>(3 to 117)  | 50<br>(-45 to 162)  |
| 24 |                    |                           |                     |                      |                      |                      |                    |                     |                   |                     |
| 25 |                    | <i>+industry response</i> | 196<br>(42 to 425)  | 420<br>(85 to 911)   | -10<br>(-111 to 120) | 67<br>(-140 to 326)  | 111<br>(51 to 198) | 250<br>(102 to 448) | 78<br>(25 to 146) | 84<br>(-10 to 203)  |
| 26 | Non-Hispanic Black | <i>consumer behavior</i>  | 48<br>(-7 to 125)   | 16<br>(-72 to 117)   | 22<br>(-1 to 49)     | 27<br>(-18 to 78)    | 29<br>(8 to 57)    | 18<br>(-15 to 56)   | 5<br>(-5 to 17)   | 9<br>(1 to 17)      |
| 27 |                    |                           |                     |                      |                      |                      |                    |                     |                   |                     |
| 28 |                    | <i>+industry response</i> | 78<br>(18 to 162)   | 57<br>(-33 to 164)   | 31<br>(9 to 62)      | 39<br>(-3 to 91)     | 36<br>(15 to 65)   | 24<br>(-8 to 63)    | 8<br>(-1 to 20)   | 12<br>(4 to 19)     |
| 29 | Hispanic           | <i>consumer behavior</i>  | 55<br>(5 to 118)    | 175<br>(13 to 374)   | 24<br>(-4 to 53)     | 42<br>(-5 to 97)     | 4<br>(-10 to 20)   | 16<br>(-2 to 40)    | 5<br>(-2 to 13)   | 1<br>(-7 to 10)     |
| 30 |                    |                           |                     |                      |                      |                      |                    |                     |                   |                     |
| 31 |                    | <i>+industry response</i> | 88<br>(33 to 158)   | 245<br>(83 to 462)   | 32<br>(6 to 63)      | 57<br>(10 to 113)    | 9<br>(-5 to 25)    | 23<br>(5 to 48)     | 8<br>(1 to 16)    | 4<br>(-4 to 13)     |
| 32 | Other              | <i>consumer behavior</i>  | -2<br>(-23 to 25)   | 16<br>(-23 to 63)    | 14<br>(3 to 27)      | 0<br>(-18 to 20)     | 7<br>(1 to 14)     | 9<br>(3 to 17)      | 0<br>(-3 to 3)    | 2<br>(-5 to 11)     |
| 33 |                    |                           |                     |                      |                      |                      |                    |                     |                   |                     |
| 34 |                    | <i>+industry response</i> | 7<br>(-14 to 36)    | 32<br>(-7 to 82)     | 16<br>(6 to 30)      | 3<br>(-14 to 24)     | 9<br>(2 to 16)     | 11<br>(5 to 19)     | 1<br>(-2 to 4)    | 3<br>(-4 to 12)     |
| 35 |                    |                           |                     |                      |                      |                      |                    |                     |                   |                     |
| 36 |                    |                           |                     |                      |                      |                      |                    |                     |                   |                     |
| 37 |                    |                           |                     |                      |                      |                      |                    |                     |                   |                     |
| 38 |                    |                           |                     |                      |                      |                      |                    |                     |                   |                     |
| 39 |                    |                           |                     |                      |                      |                      |                    |                     |                   |                     |
| 40 |                    |                           |                     |                      |                      |                      |                    |                     |                   |                     |
| 41 |                    |                           |                     |                      |                      |                      |                    |                     |                   |                     |
| 42 |                    |                           |                     |                      |                      |                      |                    |                     |                   |                     |
| 43 |                    |                           |                     |                      |                      |                      |                    |                     |                   |                     |
| 44 |                    |                           |                     |                      |                      |                      |                    |                     |                   |                     |
| 45 |                    |                           |                     |                      |                      |                      |                    |                     |                   |                     |
| 46 |                    |                           |                     |                      |                      |                      |                    |                     |                   |                     |
| 47 |                    |                           |                     |                      |                      |                      |                    |                     |                   |                     |

| <b>Esophageal Adenocarcinoma</b> |                           |                    |                       |                    |                      |                  |                     |                  |                     |
|----------------------------------|---------------------------|--------------------|-----------------------|--------------------|----------------------|------------------|---------------------|------------------|---------------------|
| Age                              | <i>consumer behavior</i>  | 631 (33 to 1320)   |                       | 78 (-255 to 423)   |                      | 348 (113 to 584) |                     | 101 (-42 to 239) |                     |
|                                  | <i>+industry response</i> | 1150 (520 to 1870) |                       | 246 (-96 to 601)   |                      | 457 (225 to 699) |                     | 161 (19 to 302)  |                     |
| <b>Race/Ethnicity</b>            |                           |                    |                       |                    |                      |                  |                     |                  |                     |
| Non-Hispanic White               | <i>consumer behavior</i>  | 40<br>(-23 to 112) | 366<br>(-206 to 1000) | -8<br>(-47 to 36)  | 24<br>(-314 to 359)  | 24<br>(6 to 47)  | 283<br>(55 to 516)  | 22<br>(4 to 41)  | 71<br>(-65 to 202)  |
|                                  | <i>+industry response</i> | 81<br>(15 to 160)  | 732<br>(157 to 1400)  | 5<br>(-34 to 51)   | 152<br>(-176 to 495) | 35<br>(16 to 59) | 366<br>(142 to 602) | 28<br>(11 to 48) | 119<br>(-13 to 253) |
| Non-Hispanic Black               | <i>consumer behavior</i>  | 9<br>(-1 to 20)    | 9<br>(-25 to 45)      | 3<br>(0 to 7)      | 10<br>(-6 to 28)     | 4<br>(1 to 8)    | 6<br>(-6 to 18)     | 1<br>(-1 to 2)   | 3<br>(0 to 5)       |
|                                  | <i>+industry response</i> | 14<br>(3 to 26)    | 25<br>(-10 to 62)     | 4<br>(1 to 8)      | 14<br>(-2 to 33)     | 5<br>(2 to 9)    | 8<br>(-3 to 21)     | 1<br>(0 to 3)    | 4<br>(1 to 6)       |
| Hispanic                         | <i>consumer behavior</i>  | 25<br>(2 to 52)    | 164<br>(2 to 354)     | 3<br>(-1 to 13)    | 40<br>(-7 to 99)     | 1<br>(-3 to 7)   | 21<br>(3 to 42)     | 1<br>(-1 to 4)   | 1<br>(-6 to 10)     |
|                                  | <i>+industry response</i> | 40<br>(15 to 68)   | 235<br>(70 to 425)    | 5<br>(0 to 16)     | 55<br>(6 to 114)     | 3<br>(-1 to 8)   | 28<br>(10 to 50)    | 2<br>(0 to 4)    | 4<br>(-4 to 12)     |
| Other                            | <i>consumer behavior</i>  | -1<br>(-9 to 10)   | 9<br>(-14 to 35)      | 5<br>(1 to 9)      | -1<br>(-10 to 10)    | 2<br>(0 to 4)    | 6<br>(2 to 10)      | 0<br>(-1 to 1)   | 1<br>(-3 to 7)      |
|                                  | <i>+industry response</i> | 3<br>(-6 to 14)    | 18<br>(-5 to 46)      | 6<br>(2 to 10)     | 1<br>(-8 to 12)      | 2<br>(1 to 5)    | 7<br>(3 to 11)      | 0<br>(-1 to 1)   | 2<br>(-3 to 7)      |
| <b>Colorectal</b>                |                           |                    |                       |                    |                      |                  |                     |                  |                     |
| Age                              | <i>consumer behavior</i>  | 430 (139 to 779)   |                       | 56 (-48 to 184)    |                      | 150 (77 to 241)  |                     | 63 (13 to 119)   |                     |
|                                  | <i>+industry response</i> | 764 (450 to 1160)  |                       | 133 (23 to 268)    |                      | 203 (126 to 304) |                     | 95 (46 to 153)   |                     |
| <b>Race/Ethnicity</b>            |                           |                    |                       |                    |                      |                  |                     |                  |                     |
| Non-Hispanic White               | <i>consumer behavior</i>  | 49<br>(-36 to 181) | 119<br>(-75 to 391)   | -21<br>(-65 to 40) | -10<br>(-89 to 97)   | 32<br>(7 to 67)  | 72<br>(11 to 150)   | 31<br>(6 to 63)  | 22<br>(-17 to 64)   |
|                                  | <i>+industry response</i> | 106<br>(4 to 261)  | 248<br>(28 to 545)    | -6<br>(-49 to 59)  | 24<br>(-60 to 140)   | 46<br>(20 to 85) | 96<br>(36 to 176)   | 41<br>(16 to 76) | 35<br>(-3 to 81)    |
| Non-Hispanic Black               | <i>consumer behavior</i>  | 26<br>(-7 to 70)   | 27<br>(-36 to 104)    | 8<br>(0 to 21)     | 18<br>(-9 to 53)     | 13<br>(4 to 24)  | 9<br>(-10 to 31)    | 2<br>(-2 to 7)   | 5<br>(0 to 10)      |
|                                  | <i>+industry response</i> | 44<br>(9 to 94)    | 58<br>(-7 to 145)     | 12<br>(4 to 26)    | 25.1<br>(-1 to 61)   | 15<br>(7 to 27)  | 13<br>(-6 to 36)    | 3<br>(-1 to 9)   | 6<br>(2 to 12)      |
| Hispanic                         | <i>consumer behavior</i>  | 36<br>(2 to 88)    | 136<br>(21 to 300)    | 13<br>(0 to 27)    | 37<br>(5 to 74)      | 2<br>(-4 to 10)  | 13<br>(2 to 28)     | 2<br>(-1 to 7)   | 1<br>(-5 to 6)      |

|    |                    |                  |                  |              |                  |               |                  |             |                 |             |  |
|----|--------------------|------------------|------------------|--------------|------------------|---------------|------------------|-------------|-----------------|-------------|--|
| 1  |                    | <i>+industry</i> | 58               | 188          | 16               | 45            | 4                | 18          | 4               | 2           |  |
| 2  | Other              | <i>response</i>  | (17 to 120)      | (65 to 366)  | (5 to 32)        | (14 to 84)    | (-2 to 13)       | (6 to 33)   | (0 to 8)        | (-3 to 8)   |  |
| 3  |                    | <i>consumer</i>  | -1               | 16           | 5                | 0             | 2                | 5           | 0               | 1           |  |
| 4  |                    | <i>behavior</i>  | (-15 to 20)      | (-21 to 65)  | (-1 to 11)       | (-12 to 15)   | (0 to 6)         | (1 to 9)    | (-2 to 1)       | (-3 to 6)   |  |
| 5  |                    | <i>+industry</i> | 5                | 30           | 6                | 2             | 3                | 6           | 0               | 2           |  |
| 6  |                    | <i>response</i>  | (-9 to 27)       | (-5 to 83)   | (1 to 13)        | (-9 to 17)    | (1 to 7)         | (2 to 11)   | (-1 to 2)       | (-2 to 7)   |  |
| 7  | <b>Stomach</b>     |                  |                  |              |                  |               |                  |             |                 |             |  |
| 8  | <b>(Gastric</b>    |                  |                  |              |                  |               |                  |             |                 |             |  |
| 9  | <b>Cardia)</b>     |                  |                  |              |                  |               |                  |             |                 |             |  |
| 10 | Age                | <i>consumer</i>  | 286 (45 to 672)  |              | 50 (-84 to 224)  |               | 149 (58 to 282)  |             | 42 (-14 to 113) |             |  |
| 11 |                    | <i>behavior</i>  |                  |              |                  |               |                  |             |                 |             |  |
| 12 |                    | <i>+industry</i> | 513 (196 to 965) |              | 120 (-14 to 321) |               | 196 (105 to 342) |             | 67 (13 to 145)  |             |  |
| 13 |                    | <i>response</i>  |                  |              |                  |               |                  |             |                 |             |  |
| 14 | Race/Ethnicity     |                  |                  |              |                  |               |                  |             |                 |             |  |
| 15 | Non-Hispanic White | <i>consumer</i>  | 14               | 178          | -7               | 21            | 13               | 118         | 11              | 27          |  |
| 16 |                    | <i>behavior</i>  | (-16 to 63)      | (-46 to 545) | (-26 to 20)      | (-109 to 194) | (4 to 30)        | (29 to 248) | (3 to 22)       | (-26 to 95) |  |
| 17 |                    | <i>+industry</i> | 34               | 322          | -1               | 74            | 18               | 152         | 14              | 45          |  |
| 18 | Non-Hispanic Black | <i>response</i>  | (-5 to 95)       | (43 to 766)  | (-19 to 30)      | (-58 to 270)  | (7 to 38)        | (63 to 296) | (6 to 27)       | (-6 to 121) |  |
| 19 |                    | <i>consumer</i>  | 5                | 2            | 2                | 6             | 2                | 3           | 0               | 2           |  |
| 20 |                    | <i>behavior</i>  | (-1 to 17)       | (-11 to 29)  | (0 to 5)         | (-5 to 22)    | (1 to 5)         | (-5 to 13)  | (0 to 1)        | (1 to 4)    |  |
| 21 |                    | <i>+industry</i> | 9                | 7            | 2                | 9             | 3                | 4           | 1               | 3           |  |
| 22 | Hispanic           | <i>response</i>  | (2 to 22)        | (-5 to 43)   | (1 to 6)         | (-2 to 26)    | (2 to 6)         | (-3 to 15)  | (0 to 2)        | (1 to 5)    |  |
| 23 |                    | <i>consumer</i>  | 13               | 57           | 5                | 14            | 1                | 6           | 1               | 0           |  |
| 24 |                    | <i>behavior</i>  | (1 to 35)        | (-6 to 154)  | (0 to 12)        | (-3 to 38)    | (-1 to 4)        | (0 to 15)   | (0 to 2)        | (-2 to 4)   |  |
| 25 |                    | <i>+industry</i> | 22               | 86           | 6                | 19            | 1                | 8           | 1               | 1           |  |
| 26 | Other              | <i>response</i>  | (5 to 47)        | (20 to 194)  | (2 to 14)        | (3 to 46)     | (-1 to 5)        | (2 to 19)   | (0 to 3)        | (-1 to 6)   |  |
| 27 |                    | <i>consumer</i>  | -1               | 4            | 4                | 0             | 1                | 3           | 0               | 1           |  |
| 28 |                    | <i>behavior</i>  | (-5 to 7)        | (-9 to 25)   | (2 to 8)         | (-7 to 10)    | (0 to 3)         | (1 to 7)    | (-1 to 1)       | (-2 to 5)   |  |
| 29 |                    | <i>+industry</i> | 1                | 9            | 4                | 2             | 1                | 4           | 0               | 1           |  |
| 30 |                    | <i>response</i>  | (-3 to 9)        | (-4 to 34)   | (2 to 8)         | (-5 to 12)    | (0 to 3)         | (2 to 8)    | (0 to 1)        | (-2 to 5)   |  |
| 31 | <b>Multiple</b>    |                  |                  |              |                  |               |                  |             |                 |             |  |
| 32 | <b>Myeloma</b>     |                  |                  |              |                  |               |                  |             |                 |             |  |
| 33 |                    |                  |                  |              |                  |               |                  |             |                 |             |  |
| 34 | Age                | <i>consumer</i>  | 220 (65 to 441)  |              | 51 (-29 to 150)  |               | 112 (54 to 186)  |             | 42 (6 to 84)    |             |  |
| 35 |                    | <i>behavior</i>  |                  |              |                  |               |                  |             |                 |             |  |
| 36 |                    | <i>+industry</i> | 380 (202 to 657) |              | 105 (20 to 215)  |               | 151 (89 to 232)  |             | 63 (27 to 111)  |             |  |
| 37 |                    | <i>response</i>  |                  |              |                  |               |                  |             |                 |             |  |
| 38 | Race/Ethnicity     |                  |                  |              |                  |               |                  |             |                 |             |  |
| 39 | Non-Hispanic White | <i>consumer</i>  | 11               | 59           | -8               | -3            | 15               | 58          | 14              | 15          |  |
| 40 |                    | <i>behavior</i>  | (-13 to 52)      | (-34 to 221) | (-32 to 31)      | (-59 to 83)   | (2 to 41)        | (15 to 123) | (1 to 35)       | (-14 to 54) |  |
| 41 |                    |                  |                  |              |                  |               |                  |             |                 |             |  |
| 42 |                    |                  |                  |              |                  |               |                  |             |                 |             |  |
| 43 |                    |                  |                  |              |                  |               |                  |             |                 |             |  |
| 44 |                    |                  |                  |              |                  |               |                  |             |                 |             |  |
| 45 |                    |                  |                  |              |                  |               |                  |             |                 |             |  |
| 46 |                    |                  |                  |              |                  |               |                  |             |                 |             |  |
| 47 |                    |                  |                  |              |                  |               |                  |             |                 |             |  |

|    |                          |                           |                   |                    |                   |                    |                  |                   |                 |                  |
|----|--------------------------|---------------------------|-------------------|--------------------|-------------------|--------------------|------------------|-------------------|-----------------|------------------|
| 1  |                          | <i>+industry response</i> | 26<br>(-7 to 81)  | 122<br>(1 to 321)  | -1<br>(-23 to 45) | 19<br>(-37 to 123) | 22<br>(6 to 53)  | 75<br>(32 to 147) | 19<br>(6 to 44) | 26<br>(-3 to 71) |
| 2  | Non-                     | <i>consumer behavior</i>  | 17<br>(-4 to 63)  | 14<br>(-40 to 115) | 10<br>(0 to 29)   | 17<br>(-10 to 59)  | 12<br>(3 to 28)  | 7<br>(-14 to 38)  | 2<br>(-3 to 11) | 6<br>(1 to 12)   |
| 3  | Hispanic Black           | <i>+industry response</i> | 29<br>(1 to 83)   | 44<br>(-20 to 159) | 15<br>(3 to 37)   | 24<br>(-1 to 70)   | 15<br>(6 to 34)  | 11<br>(-8 to 45)  | 4<br>(-1 to 13) | 7<br>(3 to 15)   |
| 4  |                          | <i>consumer behavior</i>  | 16<br>(0 to 51)   | 72<br>(9 to 193)   | 5<br>(-3 to 17)   | 15<br>(-2 to 42)   | 1<br>(-3 to 8)   | 10<br>(2 to 22)   | 2<br>(-1 to 5)  | 0<br>(-3 to 5)   |
| 5  | Hispanic                 | <i>+industry response</i> | 28<br>(5 to 71)   | 100<br>(31 to 244) | 7<br>(0 to 21)    | 21<br>(4 to 51)    | 3<br>(-1 to 10)  | 13<br>(5 to 26)   | 3<br>(0 to 6)   | 1<br>(-2 to 6)   |
| 6  |                          | <i>consumer behavior</i>  | 0<br>(-3 to 6)    | 5<br>(-7 to 27)    | 4<br>(2 to 7)     | 0<br>(-6 to 7)     | 1<br>(0 to 2)    | 3<br>(1 to 6)     | 0<br>(-1 to 1)  | 1<br>(-2 to 4)   |
| 7  | Other                    | <i>+industry response</i> | 1<br>(-2 to 8)    | 10<br>(-2 to 36)   | 4<br>(2 to 8)     | 1<br>(-5 to 9)     | 1<br>(0 to 3)    | 4<br>(2 to 7)     | 0<br>(-1 to 1)  | 1<br>(-1 to 4)   |
| 8  |                          |                           |                   |                    |                   |                    |                  |                   |                 |                  |
| 9  | <b>Gallbladder</b>       |                           |                   |                    |                   |                    |                  |                   |                 |                  |
| 10 | Age                      | <i>consumer behavior</i>  | 136 (58 to 229)   |                    | 44 (7 to 86)      |                    | 65 (40 to 93)    |                   | 24 (9 to 41)    |                  |
| 11 |                          | <i>+industry response</i> | 239 (153 to 341)  |                    | 74 (36 to 119)    |                    | 86 (61 to 117)   |                   | 36 (20 to 53)   |                  |
| 12 |                          |                           |                   |                    |                   |                    |                  |                   |                 |                  |
| 13 | Race/Ethnicity           |                           |                   |                    |                   |                    |                  |                   |                 |                  |
| 14 | Non-                     | <i>consumer behavior</i>  | 22<br>(-10 to 64) | 15<br>(-10 to 52)  | 0<br>(-23 to 27)  | 2<br>(-14 to 19)   | 16<br>(4 to 32)  | 19<br>(6 to 36)   | 13<br>(2 to 25) | 5<br>(-4 to 14)  |
| 15 | Hispanic White           | <i>+industry response</i> | 43<br>(9 to 90)   | 32<br>(4 to 72)    | 8<br>(-15 to 37)  | 8<br>(-8 to 27)    | 23<br>(10 to 40) | 24<br>(11 to 42)  | 17<br>(6 to 30) | 8<br>(-1 to 18)  |
| 16 | Non-                     | <i>consumer behavior</i>  | 24<br>(-5 to 61)  | 2<br>(-14 to 21)   | 10<br>(0 to 21)   | 4<br>(-3 to 14)    | 12<br>(4 to 23)  | 3<br>(-3 to 10)   | 2<br>(-2 to 6)  | 2<br>(0 to 3)    |
| 17 | Hispanic Black           | <i>+industry response</i> | 40<br>(10 to 80)  | 9<br>(-7 to 31)    | 14<br>(4 to 27)   | 6<br>(-1 to 17)    | 15<br>(7 to 26)  | 4<br>(-2 to 12)   | 3<br>(0 to 7)   | 2<br>(1 to 4)    |
| 18 |                          | <i>consumer behavior</i>  | 28<br>(2 to 63)   | 33<br>(-8 to 85)   | 9<br>(-4 to 23)   | 12<br>(-2 to 30)   | 2<br>(-4 to 10)  | 6<br>(1 to 13)    | 2<br>(-1 to 6)  | 0<br>(-2 to 3)   |
| 19 | Hispanic                 | <i>+industry response</i> | 45<br>(16 to 83)  | 51<br>(9 to 106)   | 13<br>(1 to 28)   | 16<br>(3 to 35)    | 4<br>(-2 to 13)  | 8<br>(3 to 16)    | 4<br>(0 to 8)   | 1<br>(-1 to 4)   |
| 20 |                          | <i>consumer behavior</i>  | 0<br>(-10 to 16)  | 2<br>(-5 to 12)    | 5<br>(1 to 11)    | 0<br>(-2 to 2)     | 3<br>(0 to 6)    | 2<br>(1 to 4)     | 0<br>(-1 to 1)  | 0<br>(-1 to 2)   |
| 21 | Other                    | <i>+industry response</i> | 4<br>(-6 to 21)   | 5<br>(-2 to 15)    | 6<br>(2 to 12)    | 0<br>(-1 to 3)     | 4<br>(1 to 7)    | 3<br>(1 to 5)     | 0<br>(-1 to 2)  | 1<br>(-1 to 2)   |
| 22 |                          |                           |                   |                    |                   |                    |                  |                   |                 |                  |
| 23 | <b>Advanced Prostate</b> |                           |                   |                    |                   |                    |                  |                   |                 |                  |
| 24 | Age                      | <i>consumer behavior</i>  | 101 (13 to 214)   |                    | 18 (-17 to 58)    |                    | 33 (11 to 58)    |                   | 15 (-4 to 38)   |                  |
| 25 |                          |                           |                   |                    |                   |                    |                  |                   |                 |                  |
| 26 |                          |                           |                   |                    |                   |                    |                  |                   |                 |                  |
| 27 |                          |                           |                   |                    |                   |                    |                  |                   |                 |                  |
| 28 |                          |                           |                   |                    |                   |                    |                  |                   |                 |                  |
| 29 |                          |                           |                   |                    |                   |                    |                  |                   |                 |                  |
| 30 |                          |                           |                   |                    |                   |                    |                  |                   |                 |                  |
| 31 |                          |                           |                   |                    |                   |                    |                  |                   |                 |                  |
| 32 |                          |                           |                   |                    |                   |                    |                  |                   |                 |                  |
| 33 |                          |                           |                   |                    |                   |                    |                  |                   |                 |                  |
| 34 |                          |                           |                   |                    |                   |                    |                  |                   |                 |                  |
| 35 |                          |                           |                   |                    |                   |                    |                  |                   |                 |                  |
| 36 |                          |                           |                   |                    |                   |                    |                  |                   |                 |                  |
| 37 |                          |                           |                   |                    |                   |                    |                  |                   |                 |                  |
| 38 |                          |                           |                   |                    |                   |                    |                  |                   |                 |                  |
| 39 |                          |                           |                   |                    |                   |                    |                  |                   |                 |                  |
| 40 |                          |                           |                   |                    |                   |                    |                  |                   |                 |                  |
| 41 |                          |                           |                   |                    |                   |                    |                  |                   |                 |                  |
| 42 |                          |                           |                   |                    |                   |                    |                  |                   |                 |                  |
| 43 |                          |                           |                   |                    |                   |                    |                  |                   |                 |                  |
| 44 |                          |                           |                   |                    |                   |                    |                  |                   |                 |                  |
| 45 |                          |                           |                   |                    |                   |                    |                  |                   |                 |                  |
| 46 |                          |                           |                   |                    |                   |                    |                  |                   |                 |                  |
| 47 |                          |                           |                   |                    |                   |                    |                  |                   |                 |                  |

|    |                |                           |                 |                 |                |                |               |               |               |               |
|----|----------------|---------------------------|-----------------|-----------------|----------------|----------------|---------------|---------------|---------------|---------------|
| 1  |                | <i>+industry response</i> | 174 (80 to 304) |                 | 37 (1 to 83)   |                | 43 (22 to 71) |               | 24 (6 to 48)  |               |
| 2  | Race/Ethnicity |                           |                 |                 |                |                |               |               |               |               |
| 3  | Non-           |                           |                 |                 |                |                |               |               |               |               |
| 4  | Hispanic       | <i>consumer behavior</i>  | 0               | 43 (-13 to 140) | 0              | 0 (-29 to 35)  | 0             | 20 (3 to 42)  | 0             | 10 (-9 to 32) |
| 5  | White          |                           |                 |                 |                |                |               |               |               |               |
| 6  |                | <i>+industry response</i> | 0               | 82 (16 to 192)  | 0              | 11 (-17 to 50) | 0             | 27 (10 to 51) | 0             | 16 (-2 to 40) |
| 7  | Non-           | <i>consumer behavior</i>  | 0               | 2 (-31 to 51)   | 0              | 9 (-7 to 30)   | 0             | 7 (-5 to 20)  | 0             | 4 (1 to 9)    |
| 8  | Hispanic Black |                           |                 |                 |                |                |               |               |               |               |
| 9  |                | <i>+industry response</i> | 0               | 17 (-16 to 75)  | 0              | 13 (-2 to 36)  | 0             | 9 (-3 to 23)  | 0             | 6 (2 to 11)   |
| 10 | Hispanic       | <i>consumer behavior</i>  | 0               | 47 (7 to 103)   | 0              | 7 (-2 to 20)   | 0             | 4 (1 to 9)    | 0             | 0 (-1 to 3)   |
| 11 |                | <i>+industry response</i> | 0               | 64 (23 to 127)  | 0              | 10 (1 to 25)   | 0             | 6 (2 to 11)   | 0             | 1 (-1 to 3)   |
| 12 | Other          | <i>consumer behavior</i>  | 0               | 1 (-4 to 12)    | 0              | 0 (-2 to 3)    | 0             | 1 (0 to 2)    | 0             | 0 (-1 to 2)   |
| 13 |                | <i>+industry response</i> | 0               | 2 (-1 to 16)    | 0              | 0 (-2 to 3)    | 0             | 1 (1 to 2)    | 0             | 1 (-1 to 2)   |
| 14 |                |                           |                 |                 |                |                |               |               |               |               |
| 15 |                |                           |                 |                 |                |                |               |               |               |               |
| 16 |                |                           |                 |                 |                |                |               |               |               |               |
| 17 |                |                           |                 |                 |                |                |               |               |               |               |
| 18 |                |                           |                 |                 |                |                |               |               |               |               |
| 19 |                |                           |                 |                 |                |                |               |               |               |               |
| 20 | <b>Ovarian</b> |                           |                 |                 |                |                |               |               |               |               |
| 21 | Age            | <i>consumer behavior</i>  | 45 (-3 to 114)  |                 | 13 (-14 to 54) |                | 24 (9 to 51)  |               | 21 (8 to 46)  |               |
| 22 |                | <i>+industry response</i> | 87 (19 to 175)  |                 | 25 (-4 to 75)  |                | 34 (14 to 64) |               | 28 (15 to 56) |               |
| 23 |                |                           |                 |                 |                |                |               |               |               |               |
| 24 | Race/Ethnicity |                           |                 |                 |                |                |               |               |               |               |
| 25 | Non-           |                           |                 |                 |                |                |               |               |               |               |
| 26 | Hispanic       | <i>consumer behavior</i>  | 21 (-15 to 89)  | 0               | -3 (-29 to 38) | 0              | 15 (2 to 41)  | 0             | 19 (6 to 43)  | 0             |
| 27 | White          |                           |                 |                 |                |                |               |               |               |               |
| 28 |                | <i>+industry response</i> | 45 (-10 to 131) | 0               | 5 (-21 to 52)  | 0              | 22 (5 to 51)  | 0             | 25 (11 to 52) | 0             |
| 29 | Non-           | <i>consumer behavior</i>  | 7 (-3 to 27)    | 0               | 3 (0 to 11)    | 0              | 5 (2 to 11)   | 0             | 1 (-1 to 4)   | 0             |
| 30 | Hispanic Black |                           |                 |                 |                |                |               |               |               |               |
| 31 |                | <i>+industry response</i> | 13 (-1 to 38)   | 0               | 5 (1 to 13)    | 0              | 7 (3 to 13)   | 0             | 1 (0 to 5)    | 0             |
| 32 | Hispanic       | <i>consumer behavior</i>  | 15 (0 to 48)    | 0               | 6 (-1 to 16)   | 0              | 1 (-2 to 6)   | 0             | 1 (-1 to 4)   | 0             |
| 33 |                | <i>+industry response</i> | 25 (2 to 64)    | 0               | 8 (2 to 20)    | 0              | 2 (-1 to 8)   | 0             | 2 (0 to 5)    | 0             |
| 34 | Other          | <i>consumer behavior</i>  | -5 (-13 to 9)   | 0               | 5 (1 to 10)    | 0              | 2 (0 to 4)    | 0             | 0 (-1 to 1)   | 0             |
| 35 |                | <i>+industry response</i> | -1 (-9 to 15)   | 0               | 5 (2 to 11)    | 0              | 2 (1 to 4)    | 0             | 0 (0 to 1)    | 0             |
| 36 |                |                           |                 |                 |                |                |               |               |               |               |
| 37 |                |                           |                 |                 |                |                |               |               |               |               |
| 38 |                |                           |                 |                 |                |                |               |               |               |               |
| 39 |                |                           |                 |                 |                |                |               |               |               |               |
| 40 |                |                           |                 |                 |                |                |               |               |               |               |
| 41 |                |                           |                 |                 |                |                |               |               |               |               |
| 42 |                |                           |                 |                 |                |                |               |               |               |               |
| 43 |                |                           |                 |                 |                |                |               |               |               |               |
| 44 |                |                           |                 |                 |                |                |               |               |               |               |
| 45 |                |                           |                 |                 |                |                |               |               |               |               |
| 46 |                |                           |                 |                 |                |                |               |               |               |               |
| 47 |                |                           |                 |                 |                |                |               |               |               |               |

| <b>Thyroid</b> |                       |                           |              |              |              |              |             |             |            |             |
|----------------|-----------------------|---------------------------|--------------|--------------|--------------|--------------|-------------|-------------|------------|-------------|
| 1              | <b>Age</b>            | <i>consumer behavior</i>  | 9 (2 to 22)  |              | 3 (-4 to 11) |              | 6 (3 to 12) |             | 4 (1 to 7) |             |
| 2              |                       | <i>+industry response</i> | 16 (7 to 33) |              | 6 (0 to 16)  |              | 9 (5 to 15) |             | 5 (3 to 9) |             |
| 3              | <b>Race/Ethnicity</b> |                           |              |              |              |              |             |             |            |             |
| 4              | Non-Hispanic White    | <i>consumer behavior</i>  | 0 (0 to 2)   | 0 (-1 to 5)  | 0 (-1 to 1)  | -2 (-7 to 5) | 0 (0 to 1)  | 3 (0 to 8)  | 1 (0 to 4) | 1 (-1 to 3) |
| 5              |                       | <i>+industry response</i> | 0 (0 to 3)   | 1 (0 to 9)   | 0 (-1 to 2)  | 0 (-5 to 9)  | 1 (0 to 2)  | 4 (1 to 10) | 2 (1 to 4) | 1 (0 to 4)  |
| 6              | Non-Hispanic Black    | <i>consumer behavior</i>  | 1 (0 to 5)   | 1 (-2 to 7)  | 0 (0 to 1)   | 0 (0 to 2)   | 1 (0 to 2)  | 0 (0 to 1)  | 0 (0 to 1) | 0 (0 to 1)  |
| 7              |                       | <i>+industry response</i> | 2 (0 to 7)   | 2 (-1 to 10) | 0 (0 to 2)   | 0 (0 to 2)   | 1 (0 to 2)  | 0 (0 to 1)  | 0 (0 to 1) | 0 (0 to 1)  |
| 8              | Hispanic              | <i>consumer behavior</i>  | 3 (0 to 10)  | 1 (0 to 9)   | 1 (0 to 3)   | 2 (0 to 5)   | 0 (0 to 1)  | 1 (0 to 2)  | 0 (0 to 1) | 0 (0 to 1)  |
| 9              |                       | <i>+industry response</i> | 5 (1 to 14)  | 2 (0 to 12)  | 1 (0 to 4)   | 2 (1 to 7)   | 0 (0 to 1)  | 1 (0 to 3)  | 1 (0 to 2) | 0 (0 to 1)  |
| 10             | Other                 | <i>consumer behavior</i>  | 0            | 0 (-1 to 3)  | 0 (0 to 1)   | 0 (-1 to 1)  | 0 (0 to 1)  | 0 (0 to 1)  | 0          | 0 (0 to 1)  |
| 11             |                       | <i>+industry response</i> | 0            | 0 (0 to 4)   | 0 (0 to 1)   | 0 (-1 to 2)  | 0 (0 to 1)  | 0 (0 to 1)  | 0          | 0 (0 to 1)  |

1. Values are the median estimates (95% uncertainty intervals) of each distribution of 1000 simulations.

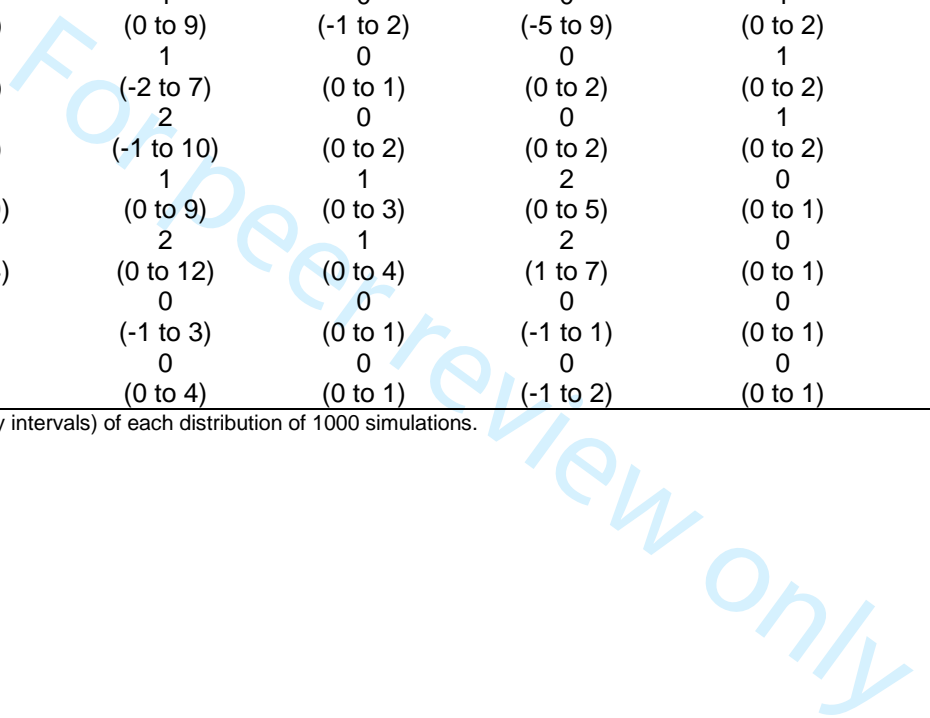



**Supplementary Table 12.** Estimated health gains and costs associated with the federal menu calorie labeling on reducing cancer burdens in the US over a lifetime, one-way sensitivity analyses at 25% and 75% calorie compensation outside restaurant settings (US population=235,162,844)<sup>1</sup>

|                                             | Menu Calorie Labeling Policy                |                                                                    |                                             |                                                                    |
|---------------------------------------------|---------------------------------------------|--------------------------------------------------------------------|---------------------------------------------|--------------------------------------------------------------------|
|                                             | 75% Compensation                            |                                                                    | 25% Compensation                            |                                                                    |
|                                             | Consumer Behavior<br>Median (2.5% to 97.5%) | Consumer Behavior +<br>Industry Response<br>Median (2.5% to 97.5%) | Consumer Behavior<br>Median (2.5% to 97.5%) | Consumer Behavior +<br>Industry Response<br>Median (2.5% to 97.5%) |
| <b>New Cancer Cases Averted, N (95% UI)</b> |                                             |                                                                    |                                             |                                                                    |
| Liver cancer                                | 2550 (265 to 5030)                          | 4280 (2000 to 6770)                                                | 7760 (5160 to 10500)                        | 12800 (9790 to 16000)                                              |
| Endometrial cancer                          | 2490 (-633 to 5890)                         | 4640 (1570 to 8070)                                                | 8890 (5500 to 12700)                        | 15100 (11800 to 19100)                                             |
| Kidney cancer                               | 2360 (65 to 4510)                           | 4160 (1900 to 6410)                                                | 7810 (5230 to 10000)                        | 13000 (10400 to 15300)                                             |
| Breast cancer (postmenopausal)              | 2060 (-616 to 5280)                         | 3930 (1260 to 7200)                                                | 7640 (4560 to 11400)                        | 13000 (9700 to 17200)                                              |
| Pancreatic cancer                           | 638 (51 to 1280)                            | 1140 (536 to 1800)                                                 | 2140 (1490 to 2890)                         | 3590 (2840 to 4460)                                                |
| Esophageal adenocarcinoma                   | 598 (-239 to 1400)                          | 1100 (262 to 1930)                                                 | 2130 (1200 to 3000)                         | 3560 (2600 to 4520)                                                |
| Colorectal cancer                           | 480 (56 to 940)                             | 851 (423 to 1330)                                                  | 1600 (1060 to 2140)                         | 2660 (2030 to 3310)                                                |
| Multiple myeloma                            | 343 (61 to 674)                             | 576 (281 to 950)                                                   | 1050 (677 to 1480)                          | 1730 (1240 to 2340)                                                |
| Stomach cancer (cardia)                     | 312 (-42 to 736)                            | 533 (192 to 998)                                                   | 994 (555 to 1530)                           | 1640 (1060 to 2300)                                                |
| Thyroid cancer                              | 185 (-70 to 498)                            | 406 (128 to 749)                                                   | 851 (473 to 1310)                           | 1470 (963 to 2100)                                                 |
| Gallbladder cancer                          | 165 (70 to 274)                             | 266 (167 to 378)                                                   | 468 (348 to 602)                            | 758 (626 to 912)                                                   |
| Advanced prostate cancer                    | 162 (-28 to 360)                            | 282 (87 to 493)                                                    | 519 (304 to 768)                            | 868 (603 to 1160)                                                  |
| Ovarian cancer                              | 65 (-17 to 179)                             | 119 (26 to 245)                                                    | 228 (96 to 398)                             | 384 (196 to 617)                                                   |
| Total                                       | 12700 (2430 to 24200)                       | 22600 (12400 to 34100)                                             | 42800 (30400 to 53900)                      | 71500 (59100 to 82800)                                             |
| <b>Cancer Deaths Prevented, N (95% UI)</b>  |                                             |                                                                    |                                             |                                                                    |
| Liver cancer                                | 2200 (199 to 4450)                          | 3750 (1720 to 5970)                                                | 6790 (4490 to 9270)                         | 11200 (8570 to 14100)                                              |
| Breast cancer (postmenopausal)              | 1140 (-958 to 3640)                         | 2420 (281 to 4990)                                                 | 4980 (2540 to 7860)                         | 8670 (6030 to 12000)                                               |
| Endometrial cancer                          | 980 (-69 to 2030)                           | 1710 (675 to 2770)                                                 | 3160 (2020 to 4450)                         | 5270 (4120 to 6630)                                                |
| Kidney cancer                               | 939 (94 to 1820)                            | 1630 (795 to 2520)                                                 | 3020 (2080 to 3930)                         | 4990 (4020 to 6020)                                                |
| Pancreatic cancer                           | 561 (54 to 1120)                            | 996 (473 to 1590)                                                  | 1870 (1300 to 2510)                         | 3130 (2480 to 3890)                                                |
| Esophageal adenocarcinoma                   | 503 (-224 to 1190)                          | 932 (203 to 1640)                                                  | 1820 (1010 to 2580)                         | 3050 (2220 to 3890)                                                |
| Colorectal cancer                           | 323 (41 to 640)                             | 571 (280 to 910)                                                   | 1080 (724 to 1440)                          | 1800 (1390 to 2240)                                                |
| Stomach cancer (cardia)                     | 264 (-32 to 623)                            | 446 (159 to 838)                                                   | 824 (454 to 1280)                           | 1360 (887 to 1910)                                                 |
| Multiple myeloma                            | 213 (45 to 411)                             | 350 (178 to 576)                                                   | 635 (419 to 897)                            | 1040 (757 to 1370)                                                 |
| Gallbladder cancer                          | 141 (60 to 234)                             | 226 (142 to 320)                                                   | 398 (300 to 512)                            | 644 (531 to 777)                                                   |
| Advanced prostate cancer                    | 80 (-12 to 179)                             | 135 (44 to 239)                                                    | 246 (144 to 373)                            | 410 (278 to 563)                                                   |
| Ovarian cancer                              | 49 (-7 to 123)                              | 87 (26 to 170)                                                     | 162 (76 to 270)                             | 272 (155 to 415)                                                   |
| Thyroid cancer                              | 11 (1 to 24)                                | 19 (8 to 33)                                                       | 34 (21 to 53)                               | 56 (39.9 to 81.8)                                                  |
| Total                                       | 7760 (1280 to 13900)                        | 13600 (7160 to 20100)                                              | 25600 (17900 to 32300)                      | 42500 (34600 to 49600)                                             |
| <b>Life Years Gained</b>                    | 34700 (5070 to 66300)                       | 62200 (32500 to 93500)                                             | 118000 (82400 to 151000)                    | 197000 (161000 to 232000)                                          |

|    |                                                                                  |                        |                         |                           |                           |
|----|----------------------------------------------------------------------------------|------------------------|-------------------------|---------------------------|---------------------------|
| 1  |                                                                                  |                        |                         |                           |                           |
| 2  |                                                                                  |                        |                         |                           |                           |
| 3  | <b>QALYs Gained</b>                                                              | 51400 (9690 to 95700)  | 90500 (49300 to 135000) | 171000 (119000 to 218000) | 284000 (234000 to 334000) |
| 4  | <b>Changes in Health-Related Costs, Cancer Only (\$, millions)<sup>2,3</sup></b> |                        |                         |                           |                           |
| 5  | Healthcare (medical) cost                                                        | -693 (-1250 to -138)   | -1210 (-1770 to -660)   | -2270 (-2850 to -1640)    | -3760 (-4360 to -3140)    |
| 6  | Patient time cost                                                                | -47.9 (-90.0 to -11.9) | -83.6 (-126 to -47.3)   | -155 (-198 to -113)       | -258 (-302 to -215)       |
| 7  | Productivity loss                                                                | -279 (-527 to -56.6)   | -490 (-743 to -271)     | -929 (-1170 to -673)      | -1550 (-1800 to -1290)    |
| 8  | <b>Policy Implementation Costs (\$, millions)<sup>2,3</sup></b>                  |                        |                         |                           |                           |
| 9  | Government cost                                                                  | 18.5 (14.5 to 25.1)    | 18.5 (14.4 to 25.5)     | 18.5 (14.5 to 25.1)       | 18.5 (14.4 to 25.5)       |
| 10 | Administration                                                                   | 9.07 (8.61 to 9.56)    | 9.09 (8.62 to 9.55)     | 9.07 (8.61 to 9.56)       | 9.09 (8.62 to 9.55)       |
| 11 | Monitoring                                                                       | 9.40 (5.45 to 16.1)    | 9.38 (5.30 to 16.3)     | 9.40 (5.45 to 16.1)       | 9.38 (5.30 to 16.3)       |
| 12 | Industry cost                                                                    | 820 (762 to 889)       | 1120 (1040 to 1210)     | 820 (762 to 889)          | 1120 (1040 to 1210)       |
| 13 | Compliance                                                                       | 820 (762 to 889)       | 823 (757 to 889)        | 820 (762 to 889)          | 823 (757 to 889)          |
| 14 | Reformulation                                                                    | -----                  | 296 (249 to 353)        | -----                     | 296 (249 to 353)          |
| 15 | <b>Net Costs, Cancer Only (\$, millions)<sup>2,3,4</sup></b>                     |                        |                         |                           |                           |
| 16 | Societal perspective                                                             | -174 (-1032 to 639)    | -653 (-1510 to 164)     | -2520 (-3390 to -1590)    | -4430 (-5310 to -3510)    |
| 17 | Healthcare perspective                                                           | -674 (-1229 to -120)   | -1190 (-1750 to -639)   | -2250 (-2830 to -1620)    | -3740 (-4350 to -3120)    |
| 18 | <b>ICER (dollars/QALY)<sup>5</sup></b>                                           |                        |                         |                           |                           |
| 19 | Societal perspective                                                             | Dominant               | Dominant                | Dominant                  | Dominant                  |
| 20 | Healthcare perspective                                                           | Dominant               | Dominant                | Dominant                  | Dominant                  |

Abbreviations: ICER, Incremental Cost-Effectiveness Ratio; QALY, quality-adjusted life years.

1. Values are the median estimates (95% uncertainty intervals) of each distribution of 1000 simulations.

2. Health-related costs were inflated to 2015 US dollars using the Personal Health Care (PHC) index. Policy intervention costs were inflated to 2015 US dollars using the Consumer Price Index. Negative costs represent savings.

3. Costs are medians from 1000 simulations so may not add up to totals.

4. Net costs were calculated as policy costs minus health-related costs from reduced cancer burden. Societal perspective includes healthcare cost, patient time costs, productivity costs, and policy implementation costs; government perspective included policy costs relevant to policy implementation and program monitoring and evaluation and medical costs.

5. ICER threshold was evaluated at \$150,000/QALY. Dominant represents less costly and more effective than the "no-policy intervention" scenario.

**Supplementary Table 13.** Estimated health gains and costs associated with the federal menu calorie labeling on reducing cancer burdens in the US over a lifetime, one-way sensitivity analysis, assuming all full-service and fast-food restaurants were covered by the policy (US population=235,162,844)<sup>1</sup>

|                                                                                  | Menu Calorie Labeling Policy                |                                                                 |
|----------------------------------------------------------------------------------|---------------------------------------------|-----------------------------------------------------------------|
|                                                                                  | Consumer Behavior<br>Median (2.5% to 97.5%) | Consumer Behavior + Industry Response<br>Median (2.5% to 97.5%) |
| <b>New Cancer Cases Averted, N (95% UI)</b>                                      |                                             |                                                                 |
| Liver cancer                                                                     | 7280 (4690 to 10100)                        | 11400 (8480 to 14400)                                           |
| Kidney cancer                                                                    | 6820 (4180 to 9460)                         | 11100 (8470 to 13700)                                           |
| Endometrial cancer                                                               | 5340 (1540 to 9220)                         | 10400 (6690 to 14300)                                           |
| Breast cancer (postmenopausal)                                                   | 4920 (1580 to 8420)                         | 9380 (5960 to 13100)                                            |
| Esophageal adenocarcinoma                                                        | 2060 (1170 to 3060)                         | 3260 (2310 to 4330)                                             |
| Pancreatic cancer                                                                | 1810 (1150 to 2600)                         | 3000 (2290 to 3870)                                             |
| Colorectal cancer                                                                | 1320 (772 to 1910)                          | 2200 (1600 to 2880)                                             |
| Stomach cancer (cardia)                                                          | 938 (531 to 1510)                           | 1480 (985 to 2140)                                              |
| Thyroid cancer                                                                   | 746 (430 to 1180)                           | 1270 (850 to 1820)                                              |
| Multiple myeloma                                                                 | 710 (377 to 1150)                           | 1270 (879 to 1820)                                              |
| Advanced prostate cancer                                                         | 430 (208 to 681)                            | 715 (461 to 1010)                                               |
| Gallbladder cancer                                                               | 329 (201 to 457)                            | 568 (435 to 708)                                                |
| Ovarian cancer                                                                   | 133 (20.9 to 292)                           | 263 (109 to 468)                                                |
| Total                                                                            | 32900 (20300 to 46000)                      | 56400 (43700 to 69300)                                          |
| <b>Cancer Deaths Prevented, N (95% UI)</b>                                       |                                             |                                                                 |
| Liver cancer                                                                     | 6460 (4170 to 8980)                         | 10000 (7480 to 12800)                                           |
| Breast cancer (postmenopausal)                                                   | 3410 (701 to 6280)                          | 6440 (3560 to 9750)                                             |
| Kidney cancer                                                                    | 2620 (1610 to 3620)                         | 4250 (3210 to 5300)                                             |
| Endometrial cancer                                                               | 1890 (654 to 3140)                          | 3610 (2390 to 4900)                                             |
| Esophageal adenocarcinoma                                                        | 1800 (1030 to 2670)                         | 2840 (2010 to 3750)                                             |
| Pancreatic cancer                                                                | 1580 (976 to 2250)                          | 2620 (1990 to 3380)                                             |
| Colorectal cancer                                                                | 923 (560 to 1310)                           | 1520 (1110 to 1970)                                             |
| Stomach cancer (cardia)                                                          | 785 (437 to 1270)                           | 1240 (812 to 1790)                                              |
| Multiple myeloma                                                                 | 431 (234 to 709)                            | 762 (524 to 1100)                                               |
| Gallbladder cancer                                                               | 275 (170 to 385)                            | 479 (366 to 601)                                                |
| Advanced prostate cancer                                                         | 219 (117 to 351)                            | 353 (233 to 506)                                                |
| Ovarian cancer                                                                   | 94 (18 to 197)                              | 185 (91 to 317)                                                 |
| Thyroid cancer                                                                   | 27 (13 to 45)                               | 45 (28 to 68)                                                   |
| Total                                                                            | 7760 (1280 to 13900)                        | 34400 (26800 to 42400)                                          |
| <b>Life Years Gained</b>                                                         | 97300 (62300 to 135000)                     | 162000 (126000 to 201000)                                       |
| <b>QALYs Gained</b>                                                              | 20500 (13100 to 28500)                      | 230000 (178000 to 287000)                                       |
| <b>Changes in Health-Related Costs, Cancer Only (\$, millions)<sup>2,3</sup></b> |                                             |                                                                 |

1  
2  
3  
4  
5  
6  
7  
8  
9  
10  
11  
12  
13  
14  
15  
16  
17  
18  
19  
20  
21  
22  
23  
24  
25  
26  
27  
28  
29  
30  
31  
32  
33  
34  
35  
36  
37  
38  
39  
40  
41  
42  
43  
44  
45  
46  
47

|                                                                 |                        |                        |
|-----------------------------------------------------------------|------------------------|------------------------|
| Healthcare (medical) cost                                       | -1820 (-2500 to -1180) | -3060 (-3740 to -2400) |
| Patient time cost                                               | -112 (-160 to -62.7)   | -197 (-245 to -148)    |
| Productivity loss                                               | -692 (-976 to -401)    | -1210 (-1490 to -916)  |
| <b>Policy Implementation Costs (\$, millions)<sup>2,3</sup></b> |                        |                        |
| Government cost                                                 | 18.4 (14.7 to 25.7)    | 18.4 (14.7 to 25.7)    |
| Administration                                                  | 9.06 (8.56 to 9.52)    | 9.07 (8.60 to 9.56)    |
| Monitoring                                                      | 9.32 (5.61 to 16.5)    | 9.37 (5.64 to 16.6)    |
| Industry cost                                                   | 821 (764 to 888)       | 1120 (1040 to 1200)    |
| Compliance                                                      | 821 (764 to 888)       | 821 (763 to 886)       |
| Reformulation                                                   | -----                  | 297 (248 to 350)       |
| <b>Net Costs, Cancer Only (\$, millions)<sup>2,3,4</sup></b>    |                        |                        |
| Societal perspective                                            | -1780 (-2790 to -831)  | -1030 (-1590 to -549)  |
| Healthcare perspective                                          | -1800 (-2470 to -1160) | -1670 (-2120 to -1270) |
| <b>ICER (dollars/QALY)<sup>5</sup></b>                          |                        |                        |
| Societal perspective                                            | Dominant               | Dominant               |
| Healthcare perspective                                          | Dominant               | Dominant               |

Abbreviations: ICER, Incremental Cost-Effectiveness Ratio; QALY, quality-adjusted life years.

1. Values are the median estimates (95% uncertainty intervals) of each distribution of 1000 simulations.
2. Health-related costs were inflated to 2015 US dollars using the Personal Health Care (PHC) index. Policy intervention costs were inflated to 2015 US dollars using the Consumer Price Index. Negative costs represent savings.
3. Costs are medians from 1000 simulations so may not add up to totals.
4. Net costs were calculated as policy costs minus health-related costs from reduced cancer burden. Societal perspective includes healthcare cost, patient time costs, productivity costs, and policy implementation costs; government perspective included policy costs relevant to policy implementation and program monitoring and evaluation and medical costs.
5. ICER threshold was evaluated at \$150,000/QALY. Dominant represents less costly and more effective than the "no-policy intervention" scenario.

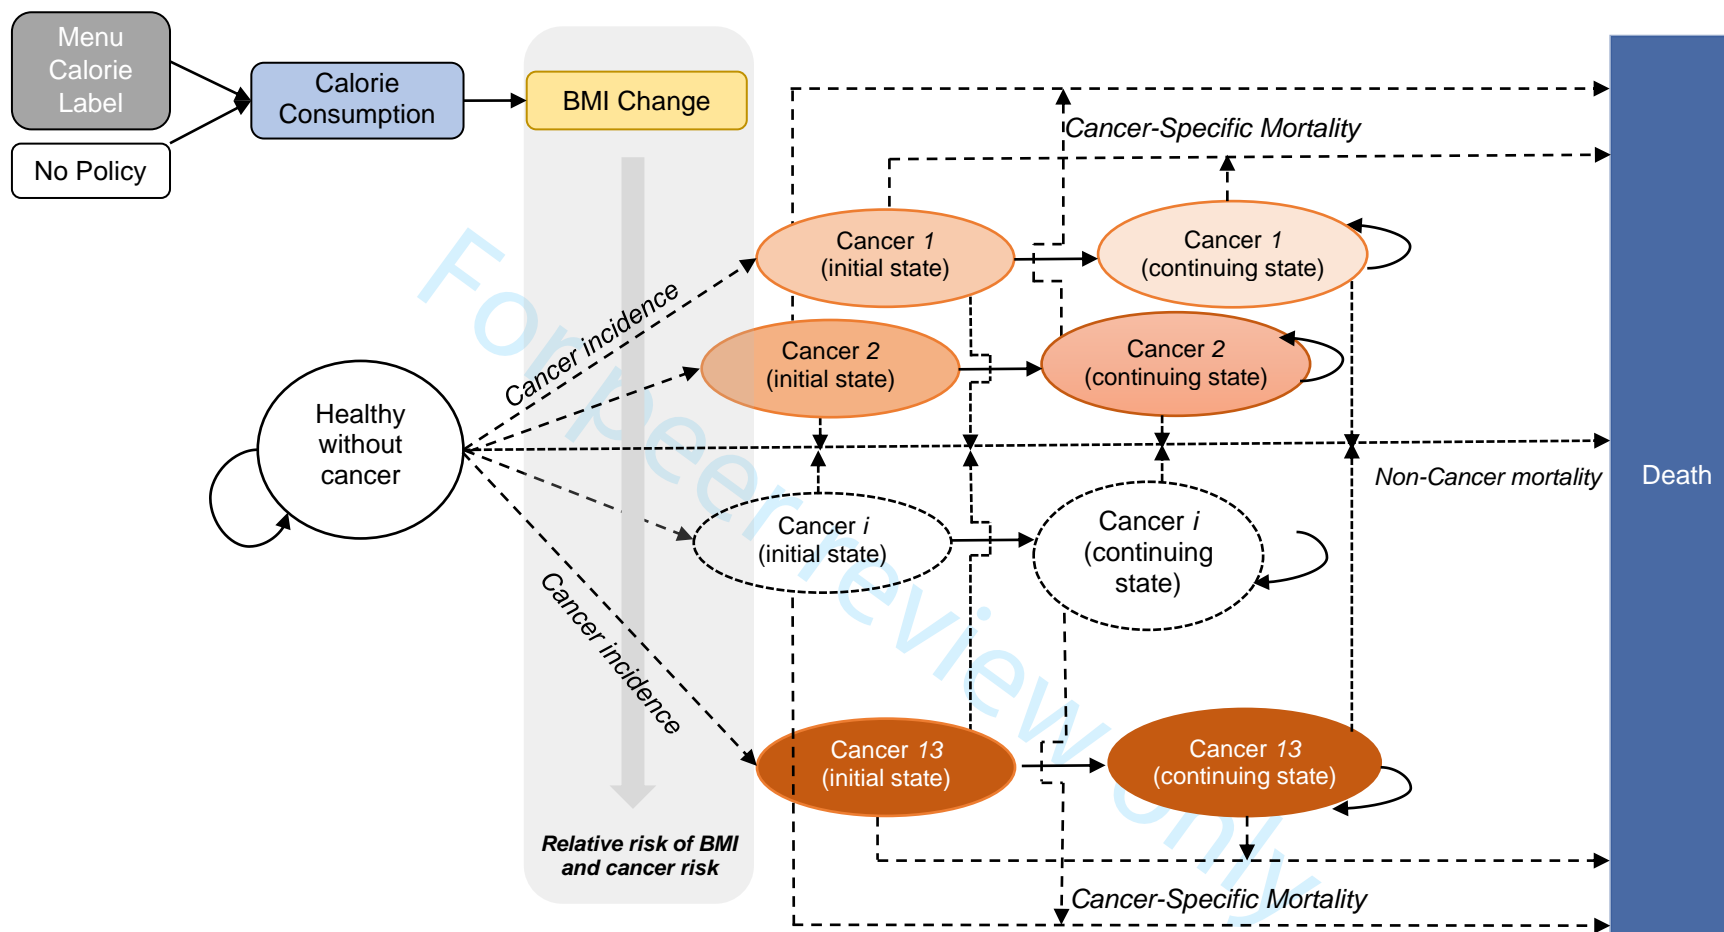

**Supplementary Figure 1. Diet and Cancer Outcome Model (DiCOM)**

The model consists of four general health states: (a) healthy without cancer (healthy state); (b) initial cancer diagnosis (initial state) for each cancer type  $i$ ; (c) continuing care (continuing state) for each cancer type  $i$ ; and (d) death state. Transitions between states are based on national cancer incidence and cancer-specific mortality rates from SEER (for individual with cancer) and lifetable-based mortality rates (for individuals without cancer). The model simulates the policy impact on the number of new cases and deaths of 13 obesity-associated cancers, health-related quality of life (HRQOL), and health-related costs among U.S. adults over a lifetime by comparing a policy scenario (menu calorie label) to a non-policy scenario (status quo).

1  
2  
3  
4  
5  
6  
7  
8  
9  
10  
11  
12  
13  
14  
15  
16  
17  
18  
19  
20  
21  
22  
23  
24  
25  
26  
27  
28  
29  
30  
31  
32  
33  
34  
35  
36  
37  
38  
39  
40  
41  
42  
43  
44  
45  
46  
47

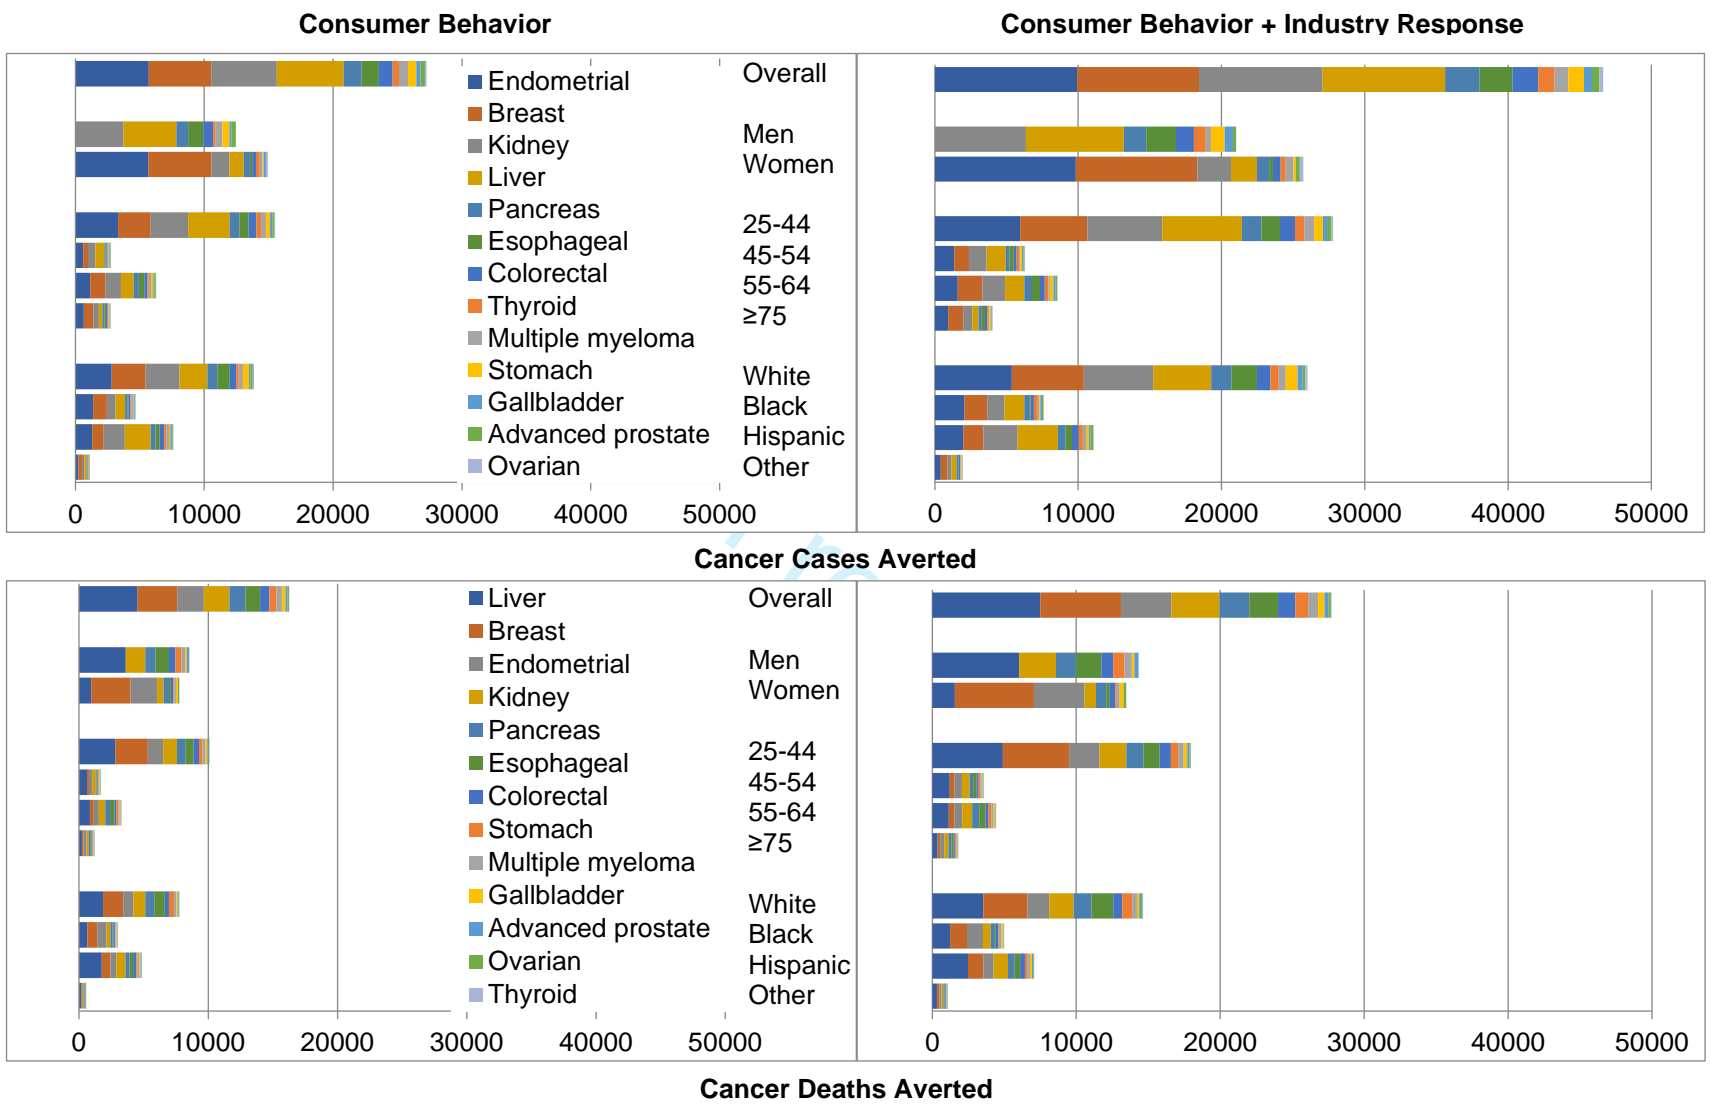

**Supplementary Figure 2.** Estimated reduced new cancer cases and deaths associated with the federal menu calorie labeling in the US by age, sex, race/ethnicity, and cancer type, over lifetime

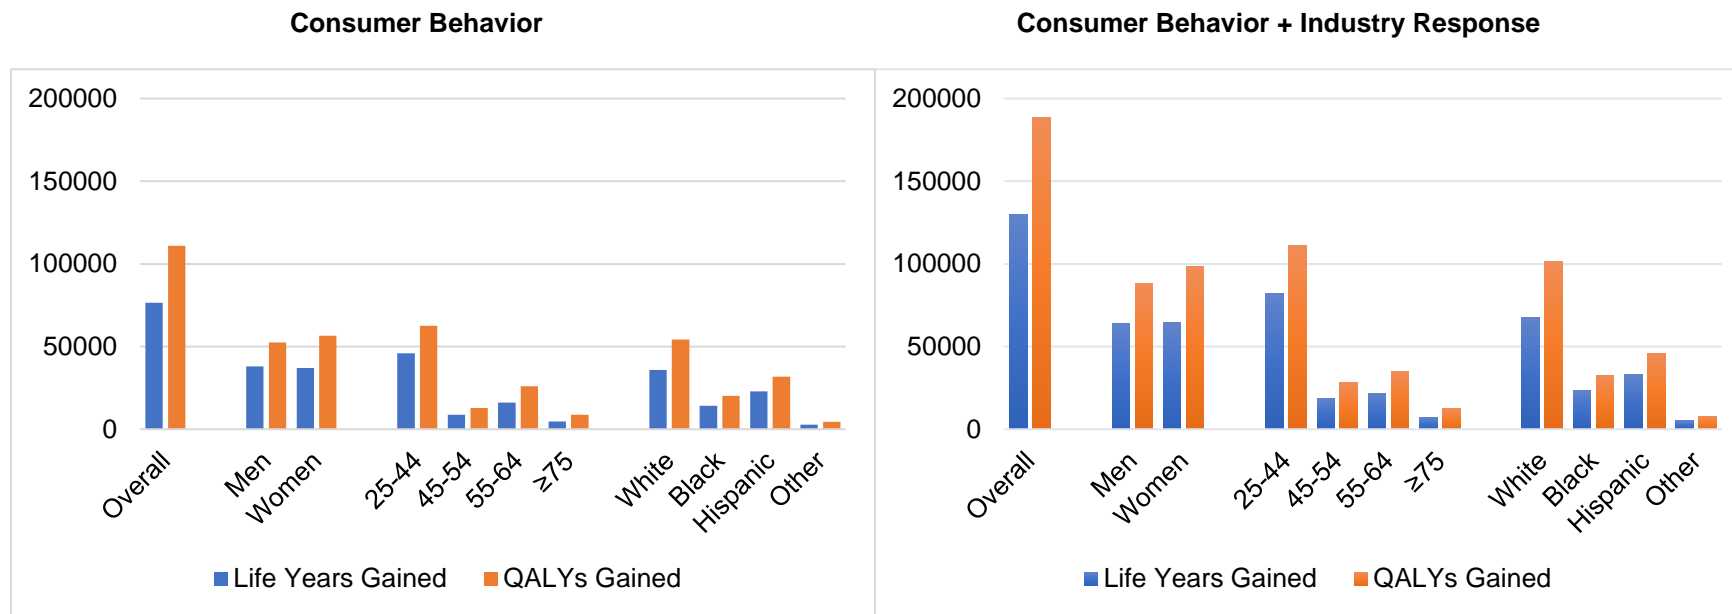

**Supplementary Figure 3.** Estimated life years and QALYs gained associated with the federal menu calorie labeling in the US by age, sex, and race/ethnicity, over a lifetime

1  
2  
3  
4  
5  
6  
7  
8  
9  
10  
11  
12  
13  
14  
15  
16  
17  
18  
19  
20  
21  
22  
23  
24  
25  
26  
27  
28  
29  
30  
31  
32  
33  
34  
35  
36  
37  
38  
39  
40  
41  
42  
43  
44  
45  
46  
47  
48  
49  
50  
51  
52  
53  
54  
55  
56  
57  
58  
59  
60

Consumer Behavior

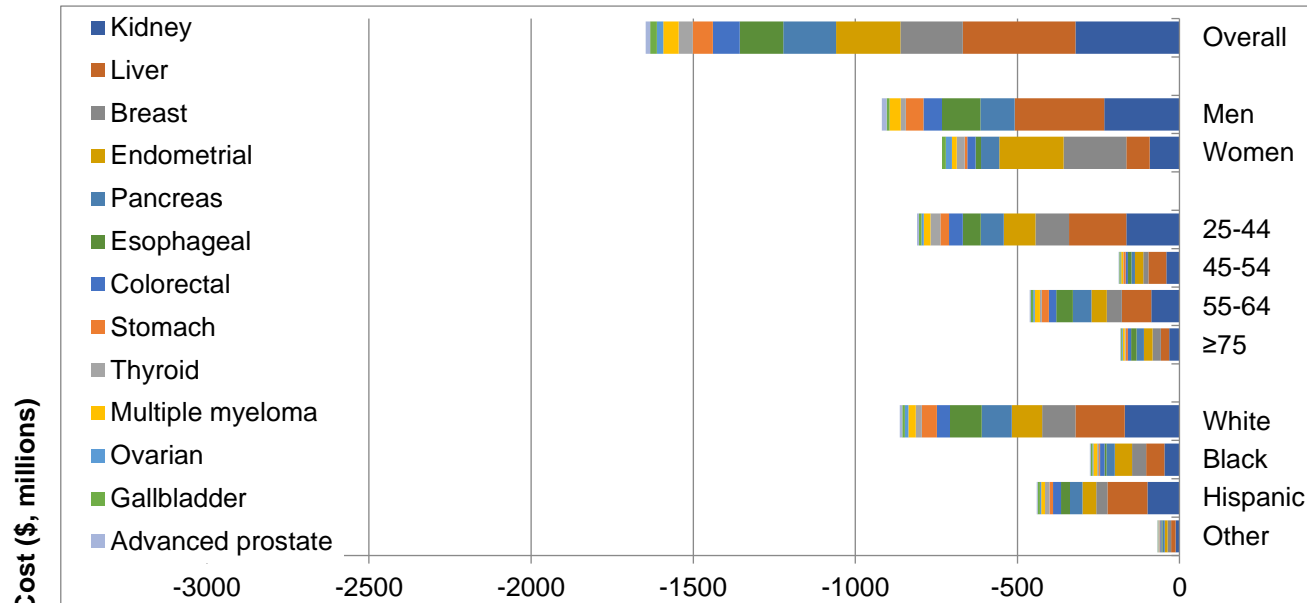

Consumer Behavior + Industry Response

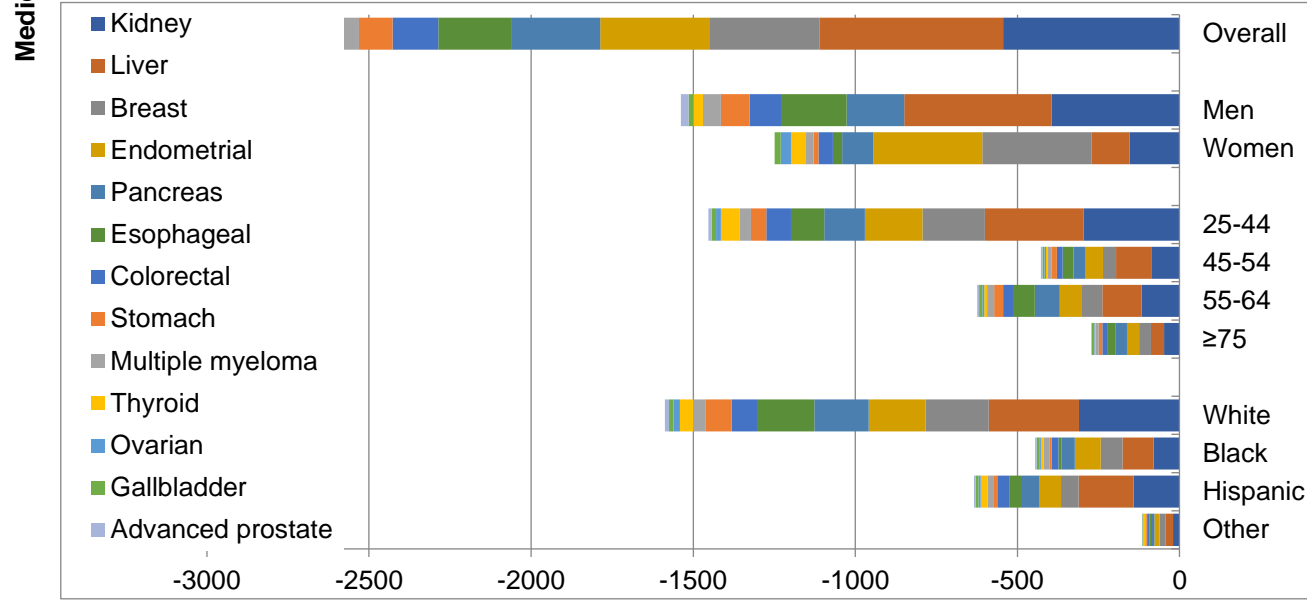

(A)



1  
2  
3  
4  
5  
6  
7  
8  
9  
10  
11  
12  
13  
14  
15  
16  
17  
18  
19  
20  
21  
22  
23  
24  
25  
26  
27  
28  
29  
30  
31  
32  
33  
34  
35  
36  
37  
38  
39  
40  
41  
42  
43  
44  
45  
46  
47  
48  
49  
50  
51  
52  
53  
54  
55  
56  
57  
58  
59  
60

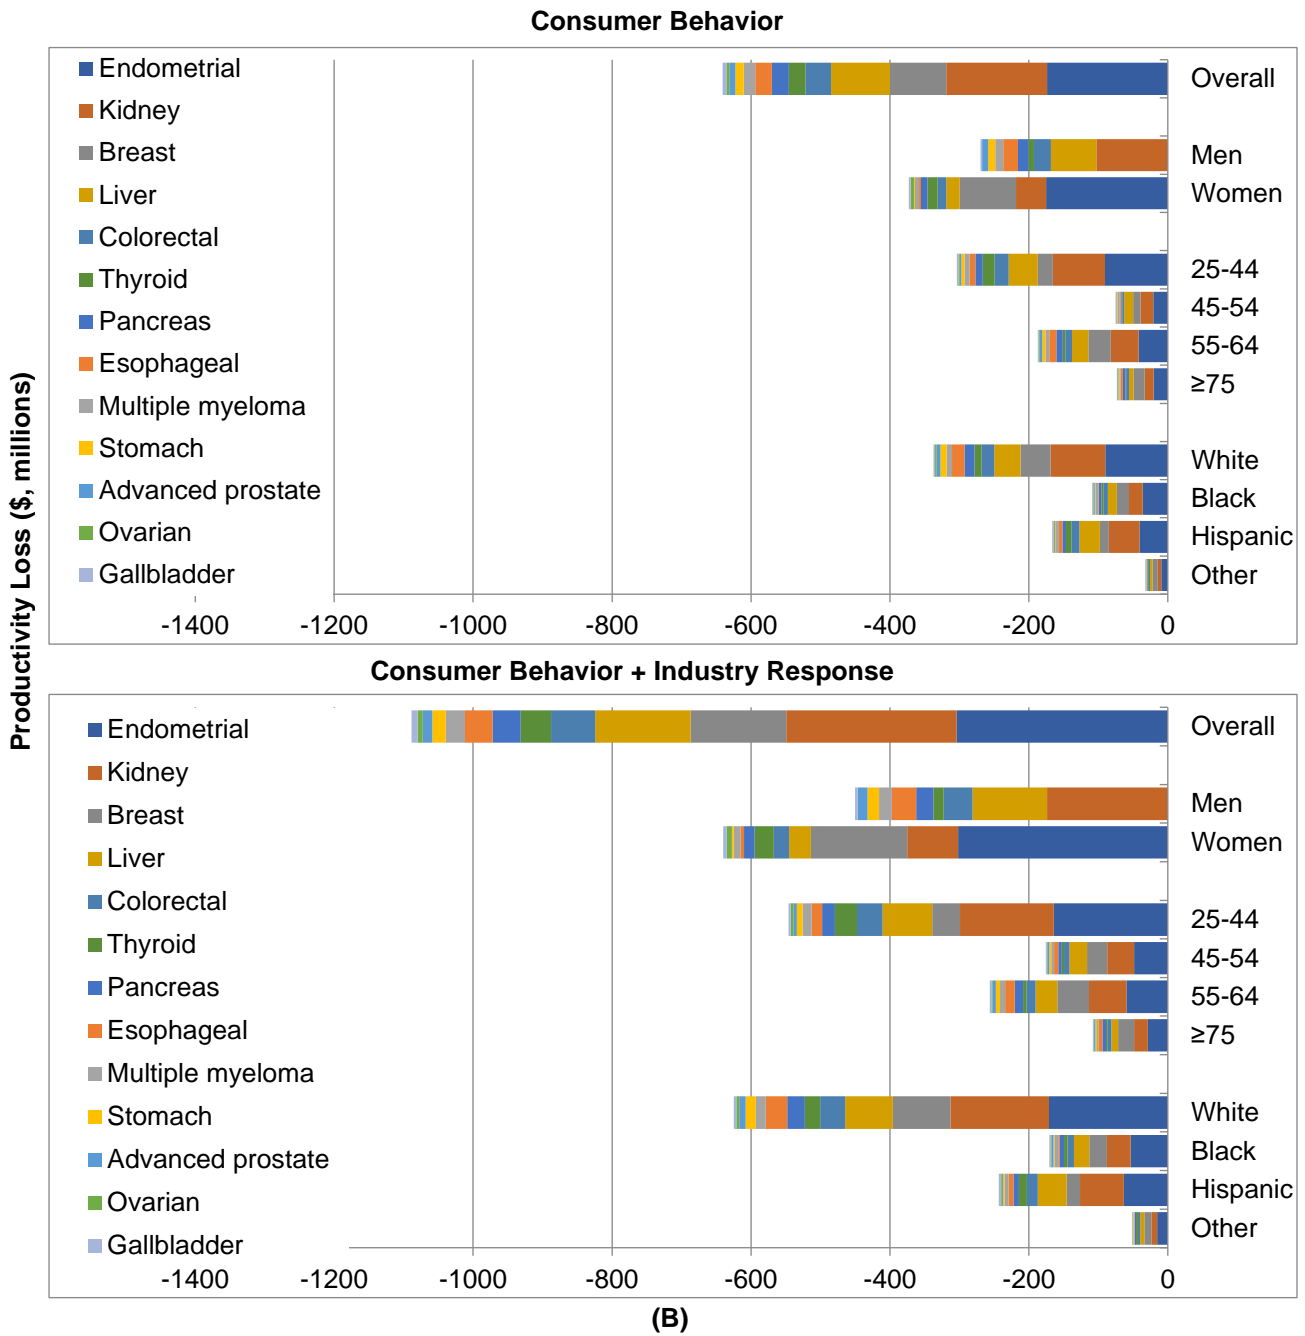

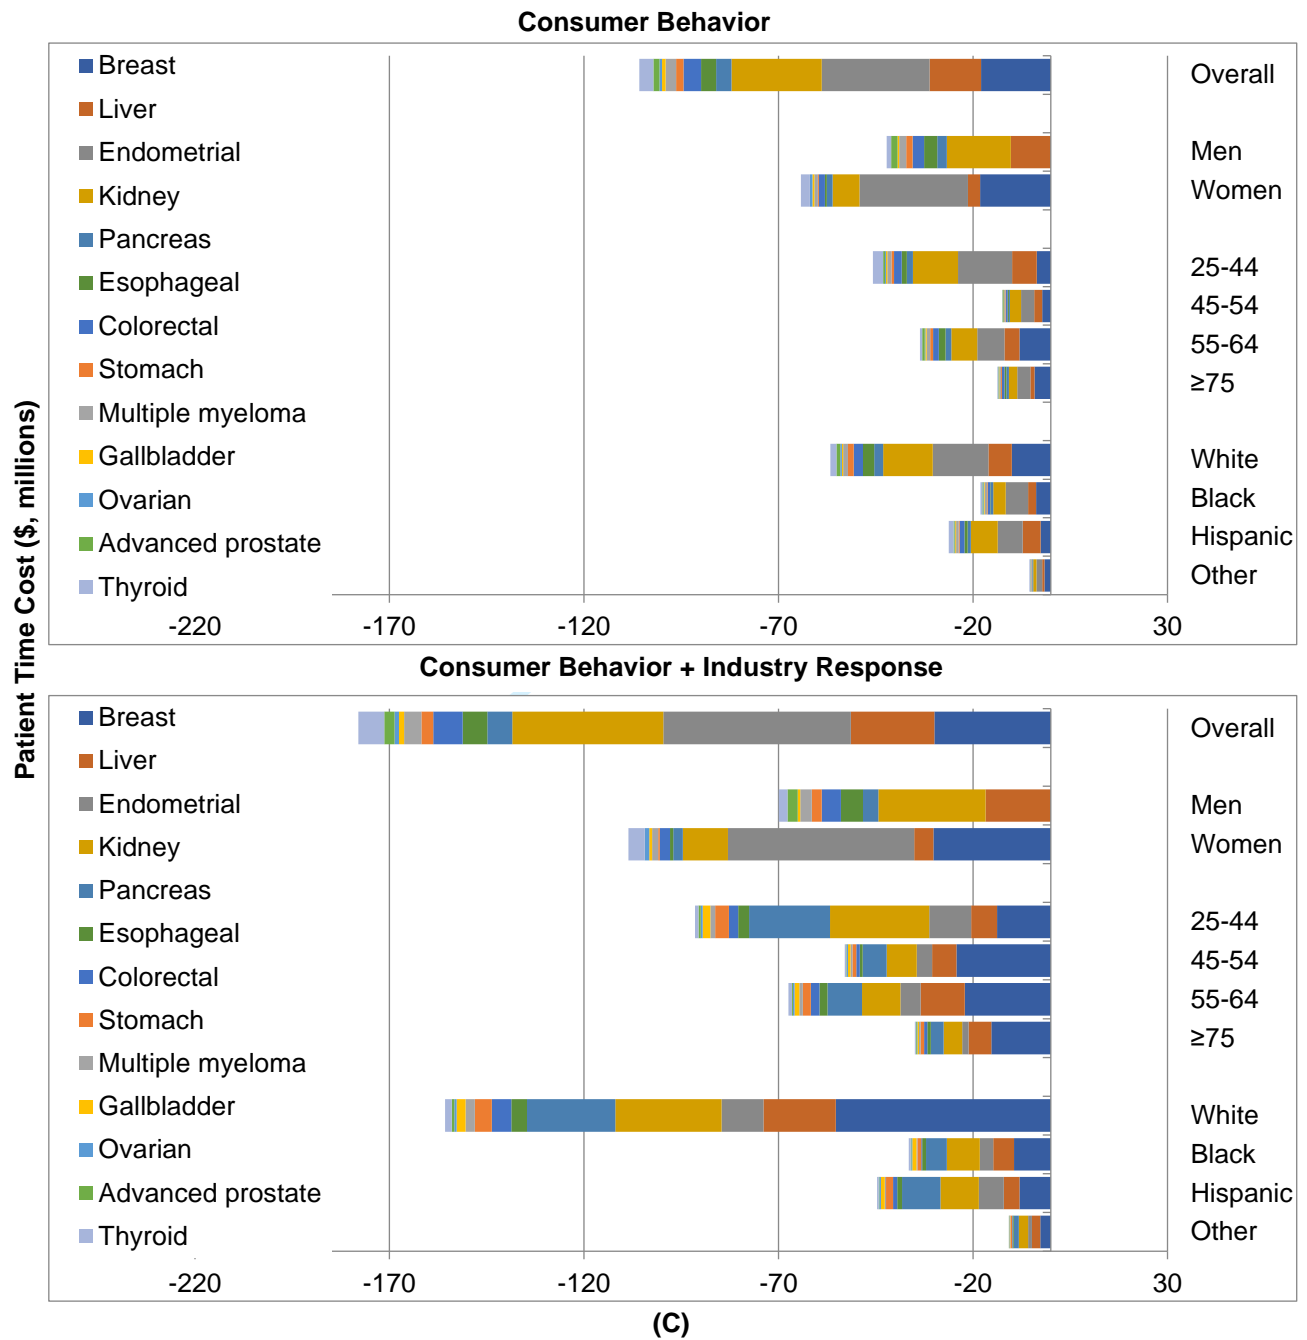

**Supplementary Figure 4.** Estimated changes of health-related costs associated with the federal menu calorie labeling in the US by age, sex, race/ethnicity, and cancer type, over lifetime

Net Costs (\$ millions)

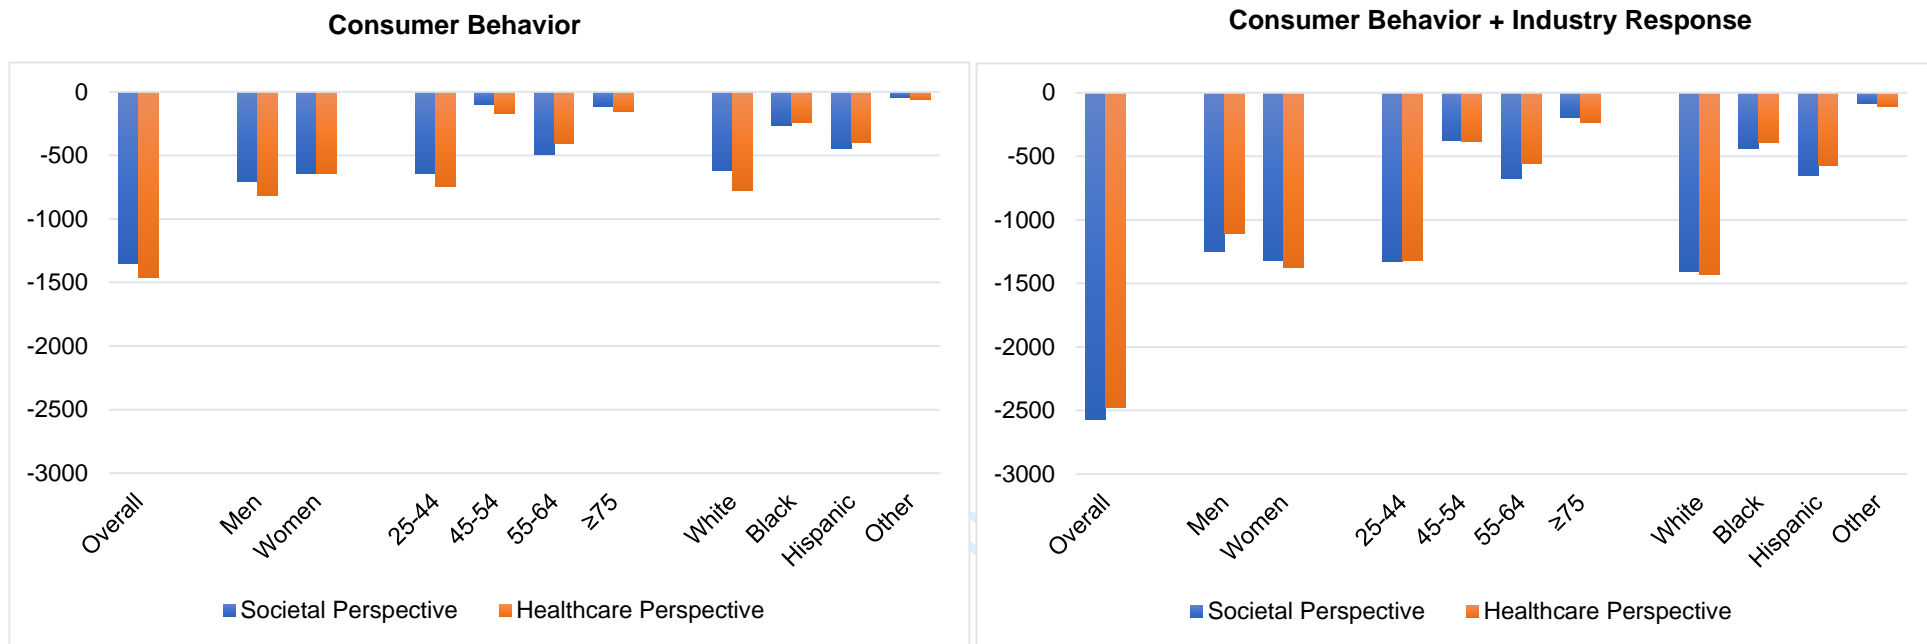

**Supplementary Figure 5.** Estimated net costs from societal and government perspectives associated with the federal menu calorie labeling policy in the US by age, sex, and race/ethnicity, over a lifetime

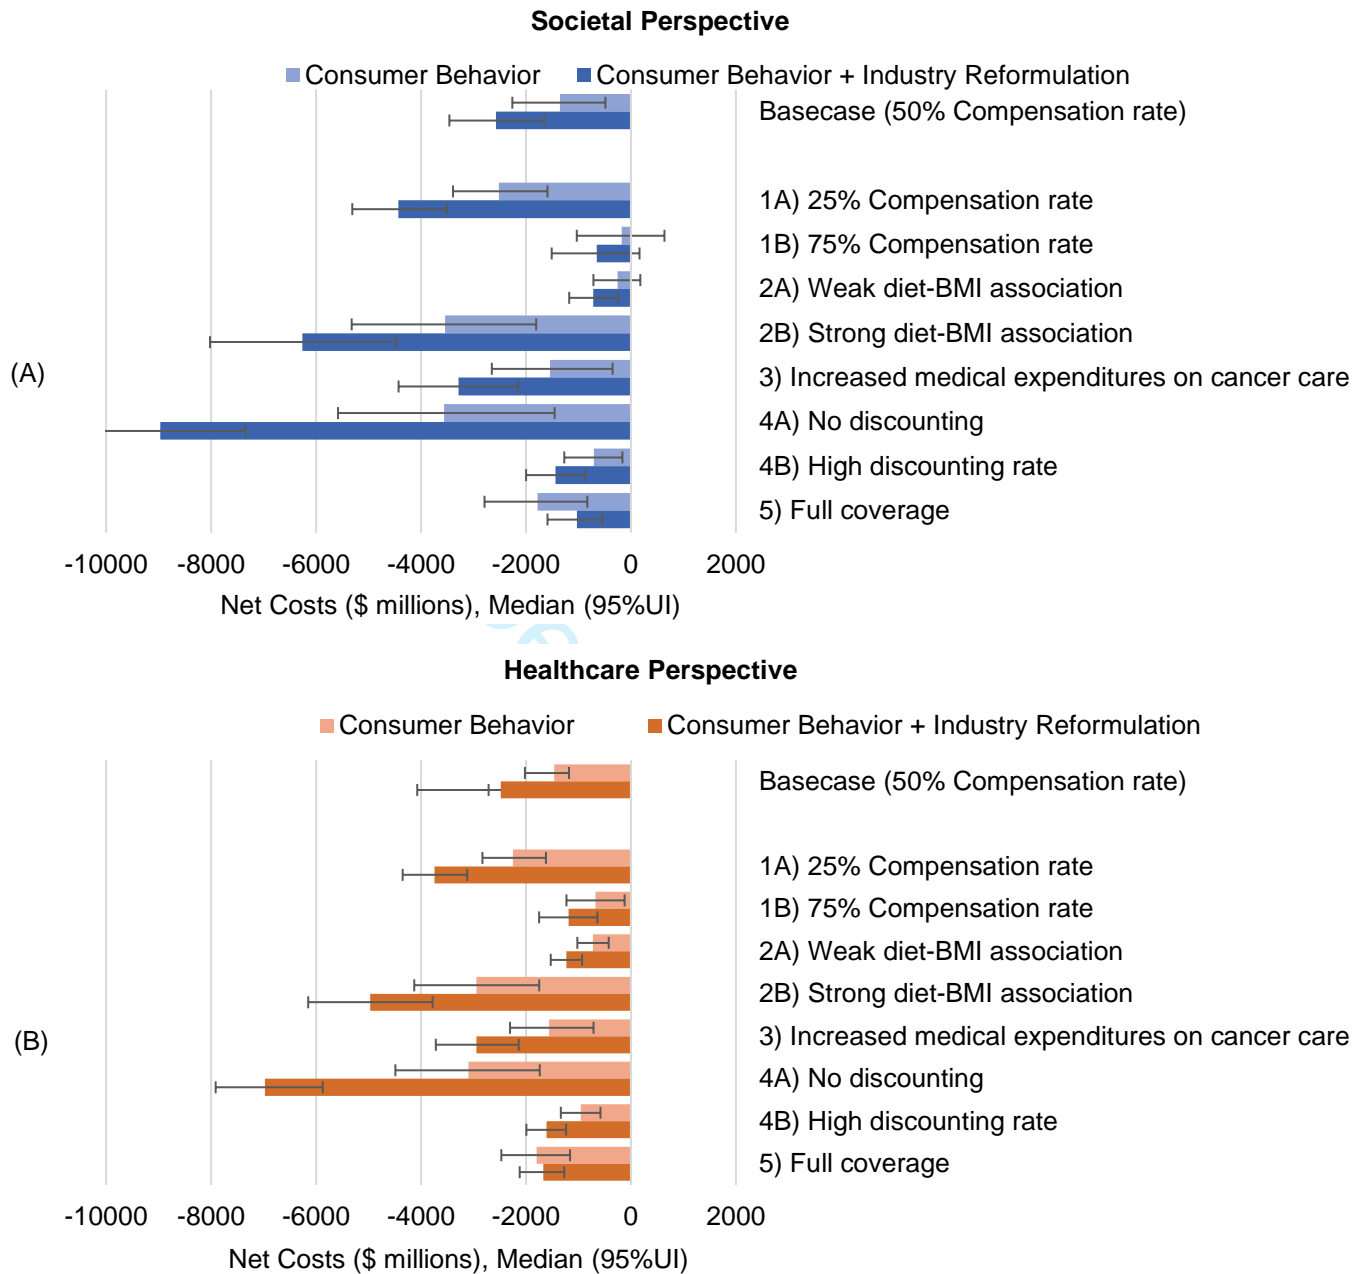

**Supplementary Figure 6.** One-Way Sensitivity Analysis of Net Costs of Menu Calorie Labeling and Obesity-Associated Cancer Rates by Varying Assumptions of Key Input Parameters From (A) Societal Perspective and (B) Healthcare Perspective

1a) assumed that only 25% of calorie reduction as a result of industry response would translate into long-term reductions in daily calories; 1b) assumed that only 75% of calorie reduction as a result of industry response would translate into long-term reductions in daily calories; 2a) weaker diet-BMI association assumed half of the base-case diet-BMI association; 2b) stronger diet-BMI association assumed two times of the base-case diet-BMI association; 3) 2% annual increase in medical expenditure on cancer care; 4a) lower discounting rate assumed 0% discounting rate; 4b) higher discounting rate assumed 5% discounting rate; and 5) assumed the coverage of the FDA's final rule increasing from 56.5% to 100% of the calories from full-service restaurants. Under base-case scenario (policy effect assumed consumer behavior: -7.3%, and industry reformulation: -5.0%; assumed that only 50% of calorie reduction as a result of industry response would translate into long-term reductions in daily calories; diet-BMI association assumed healthy-weight: 0.0015 kg/m<sup>2</sup> per kcal, and overweight/obese: 0.003 kg/m<sup>2</sup> per kcal; medical expenditure on cancer care assumed 0% annual increase; discounting rate assumed 3%; policy coverage would affect 56.5% of calories consumed at full-service restaurants and 100% of calories consumed at fast-food restaurants), the policy was cost-saving from both societal and healthcare perspectives. The policy remained cost-saving for all sensitivity analyses from the healthcare perspective and from societal perspective with additional industry reformulation. With consumer behavior alone, the policy was cost-saving under all scenarios.

**CHEERS Checklist**

**Items to include when reporting economic evaluations of health interventions**

The **ISPOR CHEERS Task Force Report**, *Consolidated Health Economic Evaluation Reporting Standards (CHEERS)—Explanation and Elaboration: A Report of the ISPOR Health Economic Evaluations Publication Guidelines Good Reporting Practices Task Force*, provides examples and further discussion of the 24-item CHEERS Checklist and the CHEERS Statement. It may be accessed via the *Value in Health* or via the ISPOR Health Economic Evaluation Publication Guidelines – CHEERS: Good Reporting Practices webpage: <http://www.ispor.org/TaskForces/EconomicPubGuidelines.asp>

| Section/item                    | Item No | Recommendation                                                                                                                                                                             | Reported on page No/line No  |
|---------------------------------|---------|--------------------------------------------------------------------------------------------------------------------------------------------------------------------------------------------|------------------------------|
| <b>Title and abstract</b>       |         |                                                                                                                                                                                            |                              |
| Title                           | 1       | Identify the study as an economic evaluation or use more specific terms such as “cost-effectiveness analysis”, and describe the interventions compared.                                    | Page 1/Lines 1-2             |
| Abstract                        | 2       | Provide a structured summary of objectives, perspective, setting, methods (including study design and inputs), results (including base case and uncertainty analyses), and conclusions.    | Pages 3-4/<br>Lines 32-59    |
| <b>Introduction</b>             |         |                                                                                                                                                                                            |                              |
| Background and objectives       | 3       | Provide an explicit statement of the broader context for the study.<br>Present the study question and its relevance for health policy or practice decisions.                               | Pages 5-6/<br>Lines 64-92    |
| <b>Methods</b>                  |         |                                                                                                                                                                                            |                              |
| Target population and subgroups | 4       | Describe characteristics of the base case population and subgroups analysed, including why they were chosen.                                                                               | Page 9/<br>Lines 106-113     |
| Setting and location            | 5       | State relevant aspects of the system(s) in which the decision(s) need(s) to be made.                                                                                                       | Page 6/Lines 96-98           |
| Study perspective               | 6       | Describe the perspective of the study and relate this to the costs being evaluated.                                                                                                        | Page 12/<br>Lines 189-197    |
| Comparators                     | 7       | Describe the interventions or strategies being compared and state why they were chosen.                                                                                                    | Pages 9-10/<br>Lines 125-140 |
| Time horizon                    | 8       | State the time horizon(s) over which costs and consequences are being evaluated and say why appropriate.                                                                                   | Page 6/<br>Lines 98-99       |
| Discount rate                   | 9       | Report the choice of discount rate(s) used for costs and outcomes and say why appropriate.                                                                                                 | Page 12<br>/Line 198         |
| Choice of health outcomes       | 10      | Describe what outcomes were used as the measure(s) of benefit in the evaluation and their relevance for the type of analysis performed.                                                    | Page 11/<br>Lines 158-170    |
| Measurement of effectiveness    | 11a     | <i>Single study-based estimates:</i> Describe fully the design features of the single effectiveness study and why the single study was a sufficient source of clinical effectiveness data. |                              |

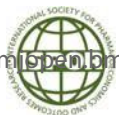

|    |                         |     |                                                                                                                                                                                                                                                                                                                                                       |                                                                                      |
|----|-------------------------|-----|-------------------------------------------------------------------------------------------------------------------------------------------------------------------------------------------------------------------------------------------------------------------------------------------------------------------------------------------------------|--------------------------------------------------------------------------------------|
| 1  |                         | 11b | <i>Synthesis-based estimates</i> : Describe fully the methods used for identification of included studies and synthesis of clinical effectiveness data.                                                                                                                                                                                               | Pages 9-11/<br>Lines 115-170                                                         |
| 2  |                         |     |                                                                                                                                                                                                                                                                                                                                                       |                                                                                      |
| 3  |                         |     |                                                                                                                                                                                                                                                                                                                                                       |                                                                                      |
| 4  | Measurement and         | 12  | If applicable, describe the population and methods used to elicit preferences for outcomes.                                                                                                                                                                                                                                                           |                                                                                      |
| 5  | valuation of preference |     |                                                                                                                                                                                                                                                                                                                                                       |                                                                                      |
| 6  | based outcomes          |     |                                                                                                                                                                                                                                                                                                                                                       |                                                                                      |
| 7  | Estimating resources    | 13a | <i>Single study-based economic evaluation</i> : Describe approaches used to estimate resource use associated with the alternative interventions. Describe primary or secondary research methods for valuing each resource item in terms of its unit cost. Describe any adjustments made to approximate to opportunity costs.                          |                                                                                      |
| 8  | and costs               |     |                                                                                                                                                                                                                                                                                                                                                       |                                                                                      |
| 9  |                         |     |                                                                                                                                                                                                                                                                                                                                                       |                                                                                      |
| 10 |                         |     |                                                                                                                                                                                                                                                                                                                                                       |                                                                                      |
| 11 |                         |     |                                                                                                                                                                                                                                                                                                                                                       |                                                                                      |
| 12 |                         |     |                                                                                                                                                                                                                                                                                                                                                       |                                                                                      |
| 13 |                         |     |                                                                                                                                                                                                                                                                                                                                                       |                                                                                      |
| 14 |                         |     |                                                                                                                                                                                                                                                                                                                                                       |                                                                                      |
| 15 |                         | 13b | <i>Model-based economic evaluation</i> : Describe approaches and data sources used to estimate resource use associated with model health states. Describe primary or secondary research methods for valuing each resource item in terms of its unit cost. Describe any adjustments made to approximate to opportunity costs.                          | Page 11/<br>Lines 168-170                                                            |
| 16 |                         |     |                                                                                                                                                                                                                                                                                                                                                       |                                                                                      |
| 17 |                         |     |                                                                                                                                                                                                                                                                                                                                                       |                                                                                      |
| 18 |                         |     |                                                                                                                                                                                                                                                                                                                                                       |                                                                                      |
| 19 |                         |     |                                                                                                                                                                                                                                                                                                                                                       |                                                                                      |
| 20 |                         |     |                                                                                                                                                                                                                                                                                                                                                       |                                                                                      |
| 21 |                         |     |                                                                                                                                                                                                                                                                                                                                                       |                                                                                      |
| 22 | Currency, price date,   | 14  | Report the dates of the estimated resource quantities and unit costs. Describe methods for adjusting estimated unit costs to the year of reported costs if necessary. Describe methods for converting costs into a common currency base and the exchange rate.                                                                                        | Page 12/Line 197-198                                                                 |
| 23 | and conversion          |     |                                                                                                                                                                                                                                                                                                                                                       |                                                                                      |
| 24 |                         |     |                                                                                                                                                                                                                                                                                                                                                       |                                                                                      |
| 25 |                         |     |                                                                                                                                                                                                                                                                                                                                                       |                                                                                      |
| 26 |                         |     |                                                                                                                                                                                                                                                                                                                                                       |                                                                                      |
| 27 |                         |     |                                                                                                                                                                                                                                                                                                                                                       |                                                                                      |
| 28 | Choice of model         | 15  | Describe and give reasons for the specific type of decision-analytical model used. Providing a figure to show model structure is strongly recommended.                                                                                                                                                                                                | Supplementary Figure 1<br>Pages 9-10/<br>Lines 118-120, 128-129,<br>135-140, 145-152 |
| 29 |                         |     |                                                                                                                                                                                                                                                                                                                                                       |                                                                                      |
| 30 |                         |     |                                                                                                                                                                                                                                                                                                                                                       |                                                                                      |
| 31 | Assumptions             | 16  | Describe all structural or other assumptions underpinning the decision-analytical model.                                                                                                                                                                                                                                                              |                                                                                      |
| 32 |                         |     |                                                                                                                                                                                                                                                                                                                                                       |                                                                                      |
| 33 | Analytical methods      | 17  | Describe all analytical methods supporting the evaluation. This could include methods for dealing with skewed, missing, or censored data; extrapolation methods; methods for pooling data; approaches to validate or make adjustments (such as half cycle corrections) to a model; and methods for handling population heterogeneity and uncertainty. | Page 13/<br>Lines 210-214                                                            |
| 34 |                         |     |                                                                                                                                                                                                                                                                                                                                                       |                                                                                      |
| 35 |                         |     |                                                                                                                                                                                                                                                                                                                                                       |                                                                                      |
| 36 |                         |     |                                                                                                                                                                                                                                                                                                                                                       |                                                                                      |
| 37 |                         |     |                                                                                                                                                                                                                                                                                                                                                       |                                                                                      |
| 38 |                         |     |                                                                                                                                                                                                                                                                                                                                                       |                                                                                      |
| 39 |                         |     |                                                                                                                                                                                                                                                                                                                                                       |                                                                                      |
| 40 |                         |     |                                                                                                                                                                                                                                                                                                                                                       |                                                                                      |
| 41 | <b>Results</b>          |     |                                                                                                                                                                                                                                                                                                                                                       |                                                                                      |
| 42 | Study parameters        | 18  | Report the values, ranges, references, and, if used, probability distributions for all parameters. Report reasons or sources for distributions used to represent uncertainty where appropriate. Providing a table to show the input values is strongly recommended.                                                                                   | Pages 7-8/Table 1                                                                    |
| 43 |                         |     |                                                                                                                                                                                                                                                                                                                                                       |                                                                                      |
| 44 |                         |     |                                                                                                                                                                                                                                                                                                                                                       |                                                                                      |
| 45 |                         |     |                                                                                                                                                                                                                                                                                                                                                       |                                                                                      |
| 46 |                         |     |                                                                                                                                                                                                                                                                                                                                                       |                                                                                      |
| 47 |                         |     |                                                                                                                                                                                                                                                                                                                                                       |                                                                                      |
| 48 | Incremental costs and   | 19  | For each intervention, report mean values for the main categories of estimated costs and outcomes of interest, as well as mean differences between the comparator groups. If applicable, report incremental cost-effectiveness ratios.                                                                                                                | Pages 16-17/<br>Table 2                                                              |
| 49 | outcomes                |     |                                                                                                                                                                                                                                                                                                                                                       |                                                                                      |
| 50 |                         |     |                                                                                                                                                                                                                                                                                                                                                       |                                                                                      |
| 51 |                         |     |                                                                                                                                                                                                                                                                                                                                                       |                                                                                      |
| 52 |                         |     |                                                                                                                                                                                                                                                                                                                                                       |                                                                                      |
| 53 | Characterising          | 20a | <i>Single study-based economic evaluation</i> : Describe the effects of sampling uncertainty for the estimated incremental cost and                                                                                                                                                                                                                   |                                                                                      |
| 54 | uncertainty             |     |                                                                                                                                                                                                                                                                                                                                                       |                                                                                      |
| 55 |                         |     |                                                                                                                                                                                                                                                                                                                                                       |                                                                                      |
| 56 |                         |     |                                                                                                                                                                                                                                                                                                                                                       |                                                                                      |
| 57 |                         |     |                                                                                                                                                                                                                                                                                                                                                       |                                                                                      |
| 58 |                         |     |                                                                                                                                                                                                                                                                                                                                                       |                                                                                      |
| 59 |                         |     |                                                                                                                                                                                                                                                                                                                                                       |                                                                                      |
| 60 |                         |     |                                                                                                                                                                                                                                                                                                                                                       |                                                                                      |

|    |                       |                                                                     |                               |
|----|-----------------------|---------------------------------------------------------------------|-------------------------------|
| 1  |                       | incremental effectiveness parameters, together with the impact      |                               |
| 2  |                       | of methodological assumptions (such as discount rate, study         |                               |
| 3  |                       | perspective).                                                       |                               |
| 4  |                       |                                                                     |                               |
| 5  | 20b                   | <i>Model-based economic evaluation:</i> Describe the effects on the |                               |
| 6  |                       | results of uncertainty for all input parameters, and uncertainty    | Page 21/<br>Lines 282-295     |
| 7  | Characterising        | related to the structure of the model and assumptions.              |                               |
| 8  | heterogeneity         |                                                                     |                               |
| 9  | 21                    | If applicable, report differences in costs, outcomes, or cost-      |                               |
| 10 |                       | effectiveness that can be explained by variations between           |                               |
| 11 |                       | subgroups of patients with different baseline characteristics or    | Pages 18-19/<br>Lines 267-281 |
| 12 |                       | other observed variability in effects that are not reducible by     |                               |
| 13 | <b>Discussion</b>     | more information.                                                   |                               |
| 14 | Study findings,       |                                                                     |                               |
| 15 | limitations,          |                                                                     |                               |
| 16 | generalisability, and | 22 Summarise key study findings and describe how they support       |                               |
| 17 | current knowledge     | the conclusions reached. Discuss limitations and the                | Pages 21-24                   |
| 18 |                       | generalisability of the findings and how the findings fit with      |                               |
| 19 | <b>Other</b>          | current knowledge.                                                  |                               |
| 20 | Source of funding     | 23 Describe how the study was funded and the role of the funder     |                               |
| 21 |                       | in the identification, design, conduct, and reporting of the        |                               |
| 22 |                       | analysis. Describe other non-monetary sources of support.           | Page 26                       |
| 23 | Conflicts of interest | 24 Describe any potential for conflict of interest of study         |                               |
| 24 |                       | contributors in accordance with journal policy. In the absence      |                               |
| 25 |                       | of a journal policy, we recommend authors comply with               | Pages 26-27                   |
| 26 |                       | International Committee of Medical Journal Editors                  |                               |
| 27 |                       | recommendations.                                                    |                               |
| 28 |                       |                                                                     |                               |
| 29 |                       |                                                                     |                               |

31 For consistency, the CHEERS Statement checklist format is based on the format of the CONSORT  
 32 statement checklist

35 The **ISPOR CHEERS Task Force Report** provides examples and further discussion of the 24-item  
 36 CHEERS Checklist and the CHEERS Statement. It may be accessed via the *Value in Health* link or via the  
 37 ISPOR Health Economic Evaluation Publication Guidelines – CHEERS: Good Reporting Practices  
 38 webpage: <http://www.ispor.org/TaskForces/EconomicPubGuidelines.asp>

41 The citation for the CHEERS Task Force Report is:  
 42 Husereau D, Drummond M, Petrou S, et al. Consolidated health economic evaluation reporting standards  
 43 (CHEERS)—Explanation and elaboration: A report of the ISPOR health economic evaluations publication  
 44 guidelines good reporting practices task force. *Value Health* 2013;16:231-50.



# BMJ Open

## What is the cost-effectiveness of menu calorie labeling on reducing obesity-associated cancer burdens: an economic evaluation of a federal policy intervention among 235 million adults in the United States

|                                 |                                                                                                                                                                                                                                                                                                                                                                                                                                                                                                                                                                                                                                                                                                                                                                                                                                                                                                                                                                                                                                 |
|---------------------------------|---------------------------------------------------------------------------------------------------------------------------------------------------------------------------------------------------------------------------------------------------------------------------------------------------------------------------------------------------------------------------------------------------------------------------------------------------------------------------------------------------------------------------------------------------------------------------------------------------------------------------------------------------------------------------------------------------------------------------------------------------------------------------------------------------------------------------------------------------------------------------------------------------------------------------------------------------------------------------------------------------------------------------------|
| Journal:                        | <i>BMJ Open</i>                                                                                                                                                                                                                                                                                                                                                                                                                                                                                                                                                                                                                                                                                                                                                                                                                                                                                                                                                                                                                 |
| Manuscript ID                   | bmjopen-2022-063614.R2                                                                                                                                                                                                                                                                                                                                                                                                                                                                                                                                                                                                                                                                                                                                                                                                                                                                                                                                                                                                          |
| Article Type:                   | Original research                                                                                                                                                                                                                                                                                                                                                                                                                                                                                                                                                                                                                                                                                                                                                                                                                                                                                                                                                                                                               |
| Date Submitted by the Author:   | 12-Dec-2022                                                                                                                                                                                                                                                                                                                                                                                                                                                                                                                                                                                                                                                                                                                                                                                                                                                                                                                                                                                                                     |
| Complete List of Authors:       | Du, Mengxi; Tufts University Friedman School of Nutrition Science and Policy,<br>Griecci, Christina; Tufts University - Boston Campus, Friedman School of Nutrition and Policy<br>Cudhea, Frederick; Tufts University Friedman School of Nutrition Science and Policy<br>Eom, Heesun; New York Academy of Medicine, REAP<br>Wong, John; Tufts Medical Center, Institute of Clinical Research and Health Policy Studies<br>Wilde, Parke; Tufts University Friedman School of Nutrition Science and Policy<br>Kim, David; Tufts Medical Center, Center for the Evaluation of Value and Risk in Health, Institute for Clinical Research and Health Policy Studies<br>Michaud, Dominique; Tuft University School of Medicine,<br>Wang, Y. Claire; Columbia University Mailman School of Public Health, Department of Health Policy and Management<br>Mozaffarian, Dariush; Friedman School of Nutrition Science and Policy, Tufts University,<br>Zhang, Fang-Fang; Tufts University Friedman School of Nutrition Science and Policy |
| <b>Primary Subject Heading</b>: | Health economics                                                                                                                                                                                                                                                                                                                                                                                                                                                                                                                                                                                                                                                                                                                                                                                                                                                                                                                                                                                                                |
| Secondary Subject Heading:      | Health policy, Public health, Nutrition and metabolism                                                                                                                                                                                                                                                                                                                                                                                                                                                                                                                                                                                                                                                                                                                                                                                                                                                                                                                                                                          |
| Keywords:                       | Health policy < HEALTH SERVICES ADMINISTRATION & MANAGEMENT, NUTRITION & DIETETICS, HEALTH ECONOMICS                                                                                                                                                                                                                                                                                                                                                                                                                                                                                                                                                                                                                                                                                                                                                                                                                                                                                                                            |
|                                 |                                                                                                                                                                                                                                                                                                                                                                                                                                                                                                                                                                                                                                                                                                                                                                                                                                                                                                                                                                                                                                 |

SCHOLARONE™  
Manuscripts





I, the Submitting Author has the right to grant and does grant on behalf of all authors of the Work (as defined in the below author licence), an exclusive licence and/or a non-exclusive licence for contributions from authors who are: i) UK Crown employees; ii) where BMJ has agreed a CC-BY licence shall apply, and/or iii) in accordance with the terms applicable for US Federal Government officers or employees acting as part of their official duties; on a worldwide, perpetual, irrevocable, royalty-free basis to BMJ Publishing Group Ltd ("BMJ") its licensees and where the relevant Journal is co-owned by BMJ to the co-owners of the Journal, to publish the Work in this journal and any other BMJ products and to exploit all rights, as set out in our [licence](#).

The Submitting Author accepts and understands that any supply made under these terms is made by BMJ to the Submitting Author unless you are acting as an employee on behalf of your employer or a postgraduate student of an affiliated institution which is paying any applicable article publishing charge ("APC") for Open Access articles. Where the Submitting Author wishes to make the Work available on an Open Access basis (and intends to pay the relevant APC), the terms of reuse of such Open Access shall be governed by a Creative Commons licence – details of these licences and which [Creative Commons](#) licence will apply to this Work are set out in our licence referred to above.

Other than as permitted in any relevant BMJ Author's Self Archiving Policies, I confirm this Work has not been accepted for publication elsewhere, is not being considered for publication elsewhere and does not duplicate material already published. I confirm all authors consent to publication of this Work and authorise the granting of this licence.

1  
2  
3 1 **What is the cost-effectiveness of menu calorie labeling on reducing obesity-associated**  
4  
5 2 **cancer burdens: an economic evaluation of a federal policy intervention among 235 million**  
6  
7 3 **adults in the United States**

8  
9  
10 4 Mengxi Du, doctoral candidate<sup>1</sup>, Christina F. Griecci, postdoctoral fellow<sup>1</sup>, Frederick Cudhea,  
11  
12 5 statistician<sup>1</sup>, Heesun Eom, research assistant<sup>1,2</sup>, John B. Wong, director of comparative  
13  
14 6 effectiveness research<sup>3</sup>, Parke Wilde, professor of food and nutrition policy<sup>1</sup>, David D. Kim,  
15  
16 7 assistant professor of medicine<sup>4</sup>, Dominique S. Michaud, professor of public health and  
17  
18 8 community medicine<sup>5</sup>, Y. Claire Wang, associate professor, vice president of research,  
19  
20 9 evaluation and policy <sup>2,6</sup>, Dariush Mozaffarian, dean and Jean Mayer professor of nutrition<sup>1</sup>,  
21  
22 10 Fang Fang Zhang, Neely Family professor of nutrition and cancer<sup>1</sup> *on behalf of the Food-PRICE*  
23  
24 11 *Project*

25  
26  
27  
28 12 1. Friedman School of Nutrition Science & Policy, Tufts University, Boston, MA

29  
30  
31 13 2. New York Academy of Medicine, New York, NY

32  
33 14 3. Division of Clinical Decision Making, Tufts Medical Center, Boston, MA

34  
35 15 4. Center for the Evaluation of Value and Risk in Health, Institute for Clinical Research and  
36  
37 16 Health Policy Studies, Tufts Medical Center, Boston, MA

38  
39  
40 17 5. Department of Public Health and Community Medicine, School of Medicine, Tufts University,  
41  
42 18 Boston, MA

43  
44 19 6. Department of Health Policy and Management, Mailman School of Public Health, Columbia  
45  
46 20 University, New York, NY

47  
48  
49 21 **Short Running Head:** Cost-Effectiveness of Menu Calorie Labeling to Prevent Cancer

50  
51 22 **Word Count:** 3895

1  
2  
3 23 **Corresponding Author:** Fang Fang Zhang, M.D., Ph.D., Friedman School of Nutrition Science  
4  
5 24 and Policy, Tufts University, 150 Harrison Avenue, Boston, MA 02111  
6  
7 25 ([fang\\_fang\\_zhang@tufts.edu](mailto:fang_fang_zhang@tufts.edu)). Phone: 617-636-3740; Fax: 617-636-3727  
8  
9  
10 26 **Abbreviations:** AMPM, Automated Multiple Pass Method; BMI, Body Mass Index; CDC,  
11  
12 27 Centers of Disease Control and Prevention; CI, Confidence Interval; DiCOM, Diet and Cancer  
13  
14 28 Outcome Model; FDA, Food and Drug Administration; FNDDS, Food and Nutrient Database for  
15  
16 29 Dietary Studies; MEC, Mobile Examination Center; NCHS, National Center for Health  
17  
18 30 Statistics; NHANES, National Health and Nutrition Examination Survey; PSA, Probabilistic  
19  
20 31 sensitivity analysis; SD, Standard Deviation; SE, Standard Error; USDA, United States  
21  
22 32 Department of Agriculture; UI, Uncertainty Interval  
23  
24  
25  
26  
27  
28  
29  
30  
31  
32  
33  
34  
35  
36  
37  
38  
39  
40  
41  
42  
43  
44  
45  
46  
47  
48  
49  
50  
51  
52  
53  
54  
55  
56  
57  
58  
59  
60

1  
2  
3 **33 ABSTRACT**  
4

5 **34 Objective** To assess the impact of menu calorie labeling on reducing obesity-associated cancer  
6  
7  
8 **35** burdens in the United States (US).

9  
10 **36 Design** Cost-effectiveness analysis using a Markov cohort state-transition model.

11  
12 **37 Setting** Policy intervention.

13  
14 **38 Participants** A modeled population of 235 million adults aged 20+ years in 2015-2016.

15  
16  
17 **39 Interventions** The impact of menu calorie labeling on reducing 13 obesity-associated cancers  
18  
19  
20  
21  
22  
23  
24  
25  
26  
27  
28  
29  
30  
31  
32  
33  
34  
35  
36  
37  
38  
39  
40  
41  
42  
43  
44  
45  
46  
47  
48  
49  
50  
51  
52  
53  
54  
55  
56  
57  
58  
59  
60  
among US adults over a lifetime was evaluated in scenarios: (1) effects on consumer behaviors;  
and (2) additional effects on industry reformulation. The model integrated nationally  
representative demographics, calorie intake from restaurants, cancer statistics, and estimates on  
associations of policy with calorie intake, dietary change with BMI change, BMI with cancer  
rates, and policy and healthcare costs from published literature.

**45 Main outcome measures** Averted new cancer cases and cancer deaths and net costs (in 2015 US  
dollars) among total population and demographic subgroups. Incremental cost-effectiveness  
ratios from societal and healthcare perspectives were assessed and compared to the threshold of  
\$150 000 per quality-adjusted life year (QALY) gained. Probabilistic sensitivity analyses  
incorporated uncertainty in input parameters and generated 95% uncertainty intervals (UIs).

**50 Results** Considering consumer behavior alone, this policy was associated with 28 000 (95% UI:  
16 300-39 100) new cancer cases and 16 700 (9610-23 600) cancer deaths averted, 111 000 (64  
800-158 000) QALY gained, and \$1480 (\$884-\$2080) million saved in cancer-related medical  
costs among US adults. The policy was associated with net cost savings of \$1460 (\$864-\$2060)  
million and \$1350 (\$486-\$2260) million from healthcare and societal perspectives, respectively.  
Additional industry reformulation would substantially increase policy impact. Greater health

56 gains and cost savings were predicted among young adults, Hispanic and non-Hispanic Black  
57 individuals.

58 **Conclusions** Study findings suggest that menu calorie labeling is associated with lower obesity-  
59 related cancer burdens and reduced healthcare costs. Policymakers may prioritize nutrition  
60 policies for cancer prevention in the US.

61 (Word Count: 300)

62 **Keywords:** obesity, cost-effectiveness, menu calorie labeling, cancer incidence, cancer death,  
63 medical cost

#### 64

#### 65 **Strengths and limitations of this study**

- 66 • Our study populated a Markov cohort state-transition model among 32 subgroups based  
67 on the nationally representative distributions of age, sex, and race/ethnicity and  
68 demonstrated that the federal menu calorie labeling could be a cost-effective strategy to  
69 reduce obesity-related cancers in the US and potentially narrow diet-associated cancer  
70 disparities.
- 71 • This cost-effectiveness evaluation incorporated data input parameters from established  
72 resources and the evidence was robust to different policy scenarios.
- 73 • However, given the nature of modeling research, this study does not provide a real-world  
74 evaluation of the impact of policy implementation on health and economic outcomes.
- 75 • We only modeled the impact of menu calorie labeling on calories although the policy  
76 may also result in potential changes in the nutritional quality of the restaurant meals.

## 77 INTRODUCTION

78 Obesity affects 1 in 3 Americans and is an established risk factor for 13 types of cancers, such as  
79 endometrial, liver, breast, prostate, and colorectal cancers.<sup>1</sup> Obesity-associated cancer represents  
80 40% of all newly diagnosed cancer cases and contributes to 43.5% of total direct cancer care  
81 expenditures, estimated at \$35.9 billion (US dollars) in 2015.<sup>1-7</sup> Rates of obesity-associated  
82 cancers are also rising disproportionately among young adults.<sup>5,8</sup> Substantial health and economic  
83 burdens highlight the need to prioritize cost-effective strategies to reduce obesity-associated  
84 cancers in the US.

85  
86 Diet is one of the few modifiable factors for both obesity and obesity-associated cancers.<sup>2,9</sup>  
87 Restaurant meals account for 1 in 5 calories consumed by US adults, including 9% of calories  
88 from full-service restaurants and 12% from fast-food restaurants,<sup>10</sup> and therefore, can be an  
89 important target for improving population diet. Restaurant meals can have very high calories,  
90 with a mean energy of 1362 kcal/meal and 969 kcal/meal in popular meals from randomly  
91 selected full-service and fast-food restaurants, respectively.<sup>11</sup> Consistently, individuals who cook  
92 less frequently at home consume more daily calories than those who cook more at home.<sup>12</sup> Thus,  
93 reducing calories consumed from restaurant meals has the potential to reduce daily calorie intake  
94 and subsequent obesity and obesity-related cancer burdens.

95  
96 To help consumers make lower-calorie choices, the Affordable Care Act mandated that all chain  
97 restaurants with 20 or more outlets post calorie information on menus and menu boards for all  
98 standard menu items.<sup>13</sup> The FDA published the final rules for this policy in 2016, which was  
99 subsequently implemented in 2018. A meta-analysis of 14 interventional studies including 5

1  
2  
3 100 randomized controlled trials (RCTs) and a recent quasi-experimental longitudinal study among  
4  
5 101 104 restaurants demonstrated that menu calorie labeling resulted in a reduction of 7.3% in caloric  
6  
7 102 intake per meal and a 60 kcal (4%) reduction in calorie purchased per transaction, respectively.<sup>14</sup>  
8  
9  
10 103 <sup>15</sup> Such policy can also motivate restaurant reformulation to lower calorie contents or introduce  
11  
12 104 healthier food options.<sup>16-21</sup> Prior cost-effectiveness analyses suggest that this policy is associated  
13  
14 105 with substantial health gains and is a cost-saving strategy for reducing obesity and obesity-  
15  
16 106 related diseases.<sup>22 23</sup> It was estimated that the menu calorie labeling on fast foods was associated  
17  
18 107 with a 25 kJ (6 kcal) reduction in mean daily energy intake, leading to a -0.2 kg change in mean  
19  
20 108 body weight, a gain of 63 492 health-adjusted life years, and net savings of half billion (2010  
21  
22 109 Australian dollars) among Australians aged 2 years and above over their lifetime.<sup>22</sup> Researchers  
23  
24 110 in the US have demonstrated that this policy would prevent a large number of incident  
25  
26 111 cardiovascular diseases (135 781) and type 2 diabetes (99 736) and net savings of over \$10  
27  
28 112 billion (2018 US dollars) among US adults over a lifetime.<sup>22 23</sup> However, the health and  
29  
30 113 economic benefits of the policy for obesity-associated cancers have not been evaluated. This  
31  
32 114 study aimed to address the knowledge gap by evaluating the cost-effectiveness of the federal  
33  
34 115 menu calorie labeling and obesity-associated cancer burdens among US adults.  
35  
36  
37  
38  
39  
40  
41

## 117 **METHODS**

### 118 **Study Overview**

119 The Diet and Cancer Outcome (DiCOM), a probabilistic cohort state-transition model,<sup>24 25</sup> was  
120 used to perform an economic evaluation of the menu calorie labeling and obesity-associated  
121 cancer rates among 235 million US adults aged 20 years and older (US Census), by comparing a  
122 policy scenario (menu calorie label) to status quo (no policy), over a simulated lifetime starting

1  
2  
3 123 from 2015. The model consists of (1) four health states: healthy without cancer, initial diagnosis  
4  
5 124 and treatment for 13 types of obesity-related cancers, continuous care for each of the 13 cancers,  
6  
7 125 and death (from 13 cancers or other causes); (2) the annual likelihood of changes in health; and  
8  
9  
10 126 (3) the lifetime consequences of such changes on health outcomes and economic costs.  
11  
12 127 (Supplementary Figure 1). The DiCOM model integrated independent parameters from different  
13  
14 128 data sources, including nationally representative population demographics, dietary intake, and  
15  
16 129 cancer statistics; association estimates of policy intervention with diet, diet change with body  
17  
18 130 mass index (BMI), and BMI with cancer risks; and policy and health-related costs from  
19  
20 131 established sources (**Table 1**). This study used de-identified datasets and was exempt from  
21  
22 132 institutional review board review and follows the Consolidated Health Economic Evaluation  
23  
24 133 Reporting Standards (CHEERS) reporting guidelines.  
25  
26  
27  
28  
29  
30  
31  
32  
33  
34  
35  
36  
37  
38  
39  
40  
41  
42  
43  
44  
45  
46  
47  
48  
49  
50  
51  
52  
53  
54  
55  
56  
57  
58  
59  
60



**Table 1. Key input parameters and data sources in the Dietary Cancer Outcome Model (DiCOM)**

| Model Input                                                                           | Outcome        | Estimates                                                                                                            | Distribution | Comments                                                                                                                                                                                                                                                           | Data Source                                                                                                                                                                                                                |
|---------------------------------------------------------------------------------------|----------------|----------------------------------------------------------------------------------------------------------------------|--------------|--------------------------------------------------------------------------------------------------------------------------------------------------------------------------------------------------------------------------------------------------------------------|----------------------------------------------------------------------------------------------------------------------------------------------------------------------------------------------------------------------------|
| 1. Simulated population                                                               | Population     | Mean consumption of calories was 332 kcal/d from full-service or fast-food restaurants (Supplementary Tables 1, 8-9) | Gamma        | Stratified by age, sex, race/ethnicity; 32 subgroups                                                                                                                                                                                                               | NHANES 2013-2016                                                                                                                                                                                                           |
| 2. Policy effect <sup>1</sup>                                                         |                |                                                                                                                      |              |                                                                                                                                                                                                                                                                    |                                                                                                                                                                                                                            |
| a) Consumer behavior                                                                  | Policy effect  | 7.3% (4.4%-10.1%) (Appendix 1 and Appendix Table 1)                                                                  | Beta         | One-time effect                                                                                                                                                                                                                                                    | Meta-analysis of labeling interventions on reducing calorie intake, Shangguan et al., 2019, American Journal of Preventative Medicine                                                                                      |
| b) Industry response                                                                  | Policy effect  | 5% (Appendix 1 and Appendix Table 2)                                                                                 | Beta         | Assumption: no reformulation in the 1st year of policy intervention; Restaurants will replace the high-calorie menu items with low-calorie options or reformulate the menu items in years 2 to 5 of the intervention to achieve a 5% reduction in calorie contents | Calorie changes in large chain restaurants from 2008 to 2015, Bleich et al. 2017, Prev Med; Higher-Calorie Menu Items Eliminated in Large Chain Restaurants, Bleich et al. 2018, American Journal of Preventative Medicine |
| 3. Effect of change in calorie intake on BMI change (kg/m <sup>2</sup> ) <sup>1</sup> | Dietary effect | Among individuals with: BMI <25: 0.0015 per kcal BMI ≥25: 0.003 per kcal                                             | Normal       | Assumption: 55 kcal per day reduction in calorie intake would lead to 1 pound weight loss within 1 year, with no further weight loss in the future                                                                                                                 | Hall et al., 2018, JAMA; Hall et al., 2011, Lancet                                                                                                                                                                         |

|                                                            |                                                                 |                                                                   |           |                                                                                                     |                                                                                                                                        |
|------------------------------------------------------------|-----------------------------------------------------------------|-------------------------------------------------------------------|-----------|-----------------------------------------------------------------------------------------------------|----------------------------------------------------------------------------------------------------------------------------------------|
| 4. Etiologic effect of BMI on cancer outcomes <sup>1</sup> | Cancer outcome                                                  | RRs ranged from 1.05 to 1.50 (Supplementary Table 2)              | Lognormal | BMI change and cancer incidence                                                                     | Continuous Update Project (CUP) conducted by the World Cancer Research Fund (WCRF)/American Institute for Cancer Research (AICR)       |
| 5. Cancer statistics <sup>1</sup>                          | Cancer incidence <sup>3</sup> and survival                      | Appendixes 2-3, Appendix Tables 2-3, and Supplementary Tables 3-4 | Beta      | Stratified by age, sex, and race/ethnicity                                                          | NCI's Surveillance, Epidemiology, and End Results Program (SEER) Database; CDC's National Program of Cancer Registries (NPCR) Database |
| 6. Healthcare-related costs <sup>1,2</sup>                 | Medical expenditures, productivity loss, and patient time costs | Appendix 6, Appendix Table 6, and Supplementary Tables 6-7        | Gamma     | Stratified by age, and sex                                                                          | NCI's Cancer Prevalence and Cost of Care Projections; Published literature                                                             |
| 7. Policy costs <sup>1,2</sup>                             | For government and industry                                     | Appendix 5 and Appendix Tables 4-5                                | Gamma     | Administration and monitoring costs for government; compliance and reformulation costs for industry | FDA's budget report; Nutrition Review Project; and FDA's RIA                                                                           |
| 8. Health-related quality of life (HRQOL) <sup>1</sup>     | For 13 types of cancers                                         | Ranged from 0.64 to 0.86 (Appendix 4 and Supplementary Table 5)   | Beta      | EQ-5D <sup>4</sup> data from published literature by cancer type                                    | Published literature                                                                                                                   |

Abbreviations: BMI, Body Mass Index; FDA, Food and Drug Administration; NCI, National Cancer Institute; NHANES, National Health, and Nutrition Examination Survey; UK, United Kingdom.

1. Uncertainty distributions were incorporated in the probabilistic sensitivity analyses. Uncertainties in each parameter were presented in supplemental materials (Table TS3 and Tables S3-9).

2. If the source did not provide uncertainty estimates, we assumed the standard errors were 20% of the mean estimate to generate gamma distribution.

3. Time-varying input parameter, for which the model accounted the secular trends. Details were provided in the Supplements.

4. EQ-5D is a standardized instrument developed by the EuroQol Group as a measure of health-related quality of life that can be used in a wide range of health conditions and treatments.

### 134 **Simulated US Population**

135 Because FDA's final rules on menu calorie labeling were published in 2016 and implemented in  
136 2018, considering that some restaurants have implemented this policy prior to 2016 given the  
137 law was passed in 2010, we used 2015-2016 as the baseline and assumed a closed cohort for this  
138 analysis. The projected population size of US adults aged 20+ in 2015-2016 was obtained from  
139 the US Census data.<sup>26</sup> We combined the 2013-2016 National Health and Nutrition Examination  
140 Survey (NHANES) to approximate the baseline and simulate the nationally representative US  
141 adult population aged 20+ years in 32 subgroups stratified by age (20-44, 45-54, 55-64, 65+), sex  
142 (men, women), and race/ethnicity (non-Hispanic White, non-Hispanic Black, Hispanic, Other)  
143 (Supplementary Table 1). This closed cohort of US adults was modeled from baseline through  
144 their lifetime up to 80 years or until death.

### 146 **Calorie Consumption from Restaurants**

147 Mean calorie consumption from full-service and fast-food restaurants, demographics, and  
148 prevalence of overweight or obesity were estimated using data collected from NHANES  
149 participants with at least one valid 24-hour diet recall, in every 32 strata. Following FDA's  
150 estimates,<sup>13</sup> we assumed that policy would affect 56.5% of calories consumed at full-service  
151 restaurants and 100% at fast-food restaurants. The National Cancer Institute method was used to  
152 estimate the usual intake distribution by statistically adjusting for within vs. between variance in  
153 dietary recalls.<sup>27-29</sup> The complex survey design was incorporated in all statistical analyses to  
154 ensure the representativeness of study findings to the non-institutionalized US adults.

155

## 156 **Policy Association with Calorie Consumption**

157 Policy association with consumer behaviors was obtained from a systematic review and meta-  
158 analysis of 13 interventional studies (5 RCTs) with 19 interventions conducted in fast-food, full-  
159 service, cafeterias, and laboratories between 2000 and 2015 that evaluated the effectiveness of  
160 menu calorie labeling on consumers' calorie consumption per meal (Appendix 1 and Appendix  
161 Table 1).<sup>15</sup> The study results showed a 7.3% (95% CI: 4.4%-10.1%) reduction in calories  
162 consumed per meal following calorie labeling. We assumed that the policy would have a one-  
163 time effect over one year, with no further change over time.

164  
165 Policy intervention may stimulate industries to reformulate their products to lower the calorie  
166 content. Potential policy impact on industry reformulation was derived from studies of restaurant  
167 menu items following the passage and initial period of partial implementation of the final rules  
168 (Appendix Table 2). Between 2012-2014, among 66 of the 100 largest US chain restaurants,  
169 replacing higher-calorie menu items with lower-calorie items led to a 1-5% calorie reduction per  
170 menu item.<sup>19 20</sup> Among 44 chain restaurants with menu calorie information available in 2008, the  
171 calories per menu item fell by 7% between 2008 and 2015.<sup>18</sup> Based on the evidence, we chose  
172 5% as the mid-point for the potential policy impact on industry response, which may include  
173 discontinuation of existing high-calorie menu items and/or introduction of lower-calorie menu  
174 items. We assumed that no reformulation occurs in the 1st year of policy intervention, and  
175 restaurants will replace the high-calorie menu items with low-calorie options or reformulate the  
176 menu items in years 2 to 5 of the intervention to achieve a 5% reduction in calorie content, with  
177 no change thereafter. Combining the effect on consumer behaviors with the effect on industry  
178 response, the policy would lead to a 12.3% reduction in calories consumed per meal.

1  
2  
3 179  
4  
5 180 In addition, we conservatively assumed that there would be some compensatory increased calorie  
6  
7  
8 181 intake outside of restaurants so that only half of all calories reduced from restaurant meals would  
9  
10 182 translate into long-term reductions in daily calories (compensation rate = 50%). Therefore, the  
11  
12 183 reduction in calorie consumption from fast-food or full-service restaurants among the simulated  
13  
14 184 population was computed using the baseline consumption times the policy effect estimates, and  
15  
16  
17 185 then times the compensation rate.  
18  
19 186  
20  
21

### 22 187 **Calorie Reduction and Obesity-Associated Cancer Risk**

23  
24 188 To estimate the relationships between calorie intake and obesity-associated cancers, we  
25  
26 189 associated the multivariate-adjusted association of change in calorie intake (kcal/day) with  
27  
28  
29 190 change in BMI (kg/m<sup>2</sup>) and the estimates of BMI and cancer risks. Based on an established  
30  
31 191 energy-weight dynamic model that accounted for the long-term impacts of calorie reduction on  
32  
33 192 weight and metabolic expenditure, we assumed that each 55 kcal/day calorie reduction leads to 1  
34  
35 193 pound weight loss over one year among overweight or obese adults, with no further reduction  
36  
37  
38 194 thereafter.<sup>30 31</sup> Because long-term observational studies suggest that weight change for an  
39  
40 195 equivalent change in dietary intake is about twice as large in overweight or obese adults than  
41  
42 196 normal-weight adults,<sup>32 33</sup> we conservatively applied half of this estimate to individuals with  
43  
44  
45 197 normal weight. For each of the 13 obesity-related cancers, the estimated change in risk for each 5  
46  
47 198 kg/m<sup>2</sup> change in BMI was derived from the systematic reviews and meta-analyses of  
48  
49 199 multivariable-adjusted prospective cohort studies conducted by the World Cancer Research  
50  
51 200 Fund/American Institute for Cancer Research Continuous Update Project and the International  
52  
53  
54 201 Agency for Research on Cancer (Supplementary Table 2).<sup>2</sup>  
55  
56  
57  
58  
59  
60

1  
2  
3 202  
4  
56 **203 Cancer Incidence, Mortality, and Health-Related Quality of Life**

7  
8 204 Age-adjusted cancer incidences in 2015 were obtained from the National Program of Cancer  
9  
10 205 Registries and the Surveillance, Epidemiology, and End Results (SEER) program. We projected  
11  
12 206 the cancer incidence from 2015 to 2030 based on the 2006-2014 trend using the Average Annual  
13  
14 207 Percent Change method.<sup>34</sup> We then combined the projected incidence rates with the projected US  
15  
16 208 population from the National Interim Projections<sup>35</sup> to account for changes in population age  
17  
18 209 distribution over time. We further applied the cohort-period method to estimate cancer incidence  
19  
20 210 in the closed cohort of US adults in each of the 32 groups as they age (Appendix 2, Appendix  
21  
22 211 Table 2, and Supplementary Table 3). The 5-year relative survival rates for each cancer were  
23  
24 212 extracted and converted to an annual probability of death (Appendix 3, Appendix Table 3, and  
25  
26 213 Supplementary Table 4).<sup>36-38</sup> Health-related quality of life data were obtained from publications  
27  
28 214 that reported EuroQol-5 Dimension utility weights for each cancer among US patient population  
29  
30 215 (Appendix 4 and Supplementary Table 5).  
31  
32  
33  
34  
35  
36  
37  
38

39 **217 Policy and Health-Related Costs**

40  
41 218 Policy costs included government costs to administer, monitor, and evaluate the policy and  
42  
43 219 industry costs to comply with the policy and reformulate their products (in scenario 2).  
44  
45 220 Government costs were estimated from FDA's budget report and Nutrition Review Project  
46  
47 221 (Appendix 5 and Appendix Tables 4-5).<sup>39 40</sup> Industry compliance and reformulation costs were  
48  
49 222 based on the FDA's regulatory impact analysis that included initial and recurring nutrition  
50  
51 223 analysis of standard menu items and menu replacement, provision of nutrition information,  
52  
53  
54  
55  
56  
57  
58  
59  
60

224 employee training, and legal review and accounted for restaurant size and type, reformulation  
225 type, and compliance period.<sup>13</sup>

226  
227 Direct medical costs for cancer care were extracted from the SEER-Medicare linked database for  
228 three phases of cancer care: initial (12 months after diagnosis), continuing, and end-of-life (the  
229 last year of life) (Appendix 6, Appendix Table 6, and Supplementary Tables 6-7).<sup>34 41</sup> For  
230 individuals without cancer, the direct medical costs were estimated based on Medical  
231 Expenditure Panel Survey (MEPS) data and insurance claims.<sup>25 42 43</sup> Indirect costs including  
232 productivity loss due to disability or missed workdays and patient time costs were derived from  
233 publications using MEPS data.<sup>44-47</sup>

234

### 235 **Cost-Effectiveness Analysis**

236 Following the guidelines on cost-effectiveness in health and medicine,<sup>48</sup> we evaluated the policy  
237 impact by projecting the numbers of new cancer cases and cancer deaths averted and quality-  
238 adjusted life-years (QALYs) gained and cost-effectiveness from both healthcare and societal  
239 perspectives. Net costs from the healthcare perspective were assessed as the difference between  
240 government costs for implementing the policy and the direct medical costs of cancer care. Net  
241 costs from the societal perspective were assessed as the difference between total policy costs  
242 (including both government and industry costs) and health-related costs saved (including direct  
243 and indirect costs of cancer care). All costs were inflated to 2015 US dollars using the Consumer  
244 Price Index or Personal Health Care Index, with all costs and QALYs discounted at 3%  
245 annually.<sup>48</sup> Incremental cost-effectiveness ratios (ICERs) were calculated as net costs divided by  
246 the difference in QALYs between policy vs. no policy. ICERs falling below a willingness-to-pay

1  
2  
3 247 threshold of \$150,000 per QALY gained were considered to be cost-effective.<sup>49 50</sup> Cost-  
4  
5 248 effectiveness analysis was further conducted among population subgroups by age, sex, and  
6  
7 249 race/ethnicity to evaluate policy associations with health disparities.  
8  
9

10 250  
11  
12  
13 251 One-way sensitivity analyses were performed by varying input parameters, including reducing  
14  
15 252 the outside-the-restaurant calorie compensation level to 25% or increasing it to 75%, altering  
16  
17 253 coverage of the FDA's final rule to all calories from full-service restaurants, reducing the diet-  
18  
19 254 BMI associations to half or doubling the estimates, incorporating an estimated 2% annual  
20  
21 255 increase in medical expenditures associated with cancer care, and altering annual discounting  
22  
23 256 rates from 3% to 0% or 5%. We also evaluated impacts at a 10-year time horizon for  
24  
25 257 stakeholders interested in shorter-term health gains and economic benefits. Probabilistic  
26  
27 258 sensitivity analyses (PSAs) were conducted to incorporate uncertainty in all input parameters  
28  
29 259 jointly (**Table 1**). A total of 1000 Monte Carlo simulations were performed, and 95% uncertainty  
30  
31 260 intervals (UIs) were estimated based on the 2.5 and 97.5 percentiles of 1,000 simulations. All  
32  
33 261 analyses were conducted using SAS (Version 9.4) and R (Version 3.3.1).  
34  
35  
36  
37  
38  
39  
40

## 41 263 **Patient and Public Involvement**

42  
43 264 This study used de-identified datasets and did not involve patients or the public in the design,  
44  
45 265 conduct, reporting, or dissemination plans of our research.  
46  
47  
48  
49  
50  
51  
52  
53  
54  
55  
56  
57  
58  
59  
60



## 266 RESULTS

### 267 Population Characteristics

268 The simulated cohort of US adults in 2015-2016 had a mean age of 47.8 years, with 65.0% being  
269 non-Hispanic white adults and 71.4% being overweight or obese (Supplementary Tables 8-9). A  
270 mean of 332 daily calories was consumed from full-service or fast-food restaurants. Higher  
271 levels were consumed among younger adults aged 20-44 years (425 kcal/day), men (388  
272 kcal/day), non-Hispanic black (361 kcal/day), and Hispanic (367 kcal/day) adults, in comparison  
273 to other corresponding subgroups.

### 275 Health Gains

276 The menu calorie labeling was estimated to reduce calories consumed from restaurants by a  
277 mean of 24 kcal/day among US adults, and total daily calories by 12 kcal/day. Accounting for  
278 potential industry reformulation would reduce the mean intake by an additional 16 kcal/day, and  
279 total daily calories by 8 kcal/day.

281 Based on changes in consumer behavior alone, the policy was associated with a reduction of  
282 28,000 (95% UI: 16,300-39,100) new cancer cases and 16,700 (9,610-23,600) cancer deaths, and  
283 a gain of 111,000 (64,800-158,000) QALYs among 235 million US adults over a median follow-  
284 up of 34.4 years (**Table 2 and Figure 1**). By cancer type, the greatest numbers of new cancer  
285 cases averted were cancers of endometrial (N [95% UI]: 5,700 [2,380-9,190]), liver (5,180  
286 [2,800-7,730]), kidney (5,090 [2,670-7,730]), post-menopausal breast (4,840 [2,010-8,230]), and  
287 pancreas (1,400 [756-2,100]). The greatest numbers of prevented cancer deaths were estimated  
288 for cancers of the liver (4,530 [2,410-6,760]), post-menopausal breast (3,080 [861-5,650]),

1  
2  
3 289 endometrial (2,060 [957-3,220]), kidney (1,980 [1,080-2,920]), and pancreas (1,230 [661-  
4  
5 290 1,830]).

6  
7 291  
8  
9  
10 292 Based on additional industry response, the total estimated health gains approximately doubled,  
11  
12 293 preventing 47,300 (35,400-59,100) new cancer cases and 28,200 (21,100-35,300) cancer deaths,  
13  
14 294 and gaining 189,000 (140,000-236,000) QALYs, with similar rankings of the types of new  
15  
16  
17 295 cancer cases and cancer deaths prevented.  
18  
19  
20  
21  
22  
23  
24  
25  
26  
27  
28  
29  
30  
31  
32  
33  
34  
35  
36  
37  
38  
39  
40  
41  
42  
43  
44  
45  
46  
47  
48  
49  
50  
51  
52  
53  
54  
55  
56  
57  
58  
59  
60

**Table 2. Estimated health gains and costs of the federal menu calorie labeling on reducing the obesity-related cancer burdens in the US over 10 years and a lifetime (US population=235,162,844)<sup>1</sup>**

|                                             | Menu Calorie Labeling Policy                |                                                                    |                                             |                                                                    |
|---------------------------------------------|---------------------------------------------|--------------------------------------------------------------------|---------------------------------------------|--------------------------------------------------------------------|
|                                             | 10 Years                                    |                                                                    | Lifetime                                    |                                                                    |
|                                             | Consumer Behavior<br>Median (2.5% to 97.5%) | Consumer Behavior +<br>Industry Response<br>Median (2.5% to 97.5%) | Consumer Behavior<br>Median (2.5% to 97.5%) | Consumer Behavior +<br>Industry Response<br>Median (2.5% to 97.5%) |
| <b>New Cancer Cases Averted, N (95% UI)</b> |                                             |                                                                    |                                             |                                                                    |
| Endometrial cancer                          | 692 (276 to 1100)                           | 1130 (716 to 1550)                                                 | 5700 (2380 to 9190)                         | 9920 (6630 to 13600)                                               |
| Liver cancer                                | 366 (144 to 615)                            | 626 (386 to 887)                                                   | 5180 (2800 to 7730)                         | 8550 (5960 to 11300)                                               |
| Kidney cancer                               | 584 (290 to 884)                            | 980 (689 to 1280)                                                  | 5090 (2670 to 7470)                         | 8620 (6200 to 11000)                                               |
| Breast cancer (postmenopausal)              | 670 (256 to 1110)                           | 1080 (658 to 1520)                                                 | 4840 (2010 to 8230)                         | 8520 (5610 to 12200)                                               |
| Pancreatic cancer                           | 170 (83 to 257)                             | 273 (183 to 367)                                                   | 1400 (756 to 2100)                          | 2380 (1690 to 3140)                                                |
| Esophageal adenocarcinoma                   | 179 (56 to 304)                             | 286 (159 to 411)                                                   | 1350 (485 to 2230)                          | 2330 (1440 to 3280)                                                |
| Colorectal cancer                           | 189 (97 to 284)                             | 319 (225 to 418)                                                   | 1050 (561 to 1600)                          | 1780 (1230 to 2370)                                                |
| Multiple myeloma                            | 75 (37 to 117)                              | 122 (81 to 169)                                                    | 690 (384 to 1090)                           | 1150 (775 to 1630)                                                 |
| Stomach cancer (cardia)                     | 54 (6 to 109)                               | 98 (51 to 165)                                                     | 647 (261 to 1140)                           | 1090 (644 to 1660)                                                 |
| Thyroid cancer                              | 105 (58 to 161)                             | 176 (123 to 243)                                                   | 516 (206 to 914)                            | 951 (576 to 1420)                                                  |
| Advanced prostate cancer                    | 66 (17 to 118)                              | 107 (57 to 162)                                                    | 339 (138 to 561)                            | 577 (352 to 836)                                                   |
| Gallbladder cancer                          | 29 (16 to 42)                               | 46 (34 to 60)                                                      | 314 (213 to 438)                            | 512 (399 to 648)                                                   |
| Ovarian cancer                              | 33 (15 to 56)                               | 53 (33 to 78)                                                      | 147 (44 to 282)                             | 254 (110 to 420)                                                   |
| Total                                       | 3300 (1750 to 4720)                         | 5230 (3870 to 6790)                                                | 28000 (16300 to 39100)                      | 47300 (35400 to 59100)                                             |
| <b>Cancer Deaths Prevented, N (95% UI)</b>  |                                             |                                                                    |                                             |                                                                    |
| Liver cancer                                | 168 (59 to 287)                             | 287 (174 to 410)                                                   | 4530 (2410 to 6760)                         | 7510 (5200 to 9980)                                                |
| Breast cancer (postmenopausal)              | 68 (33 to 106)                              | 111 (74 to 149)                                                    | 3080 (862 to 5650)                          | 5590 (3230 to 8310)                                                |
| Endometrial cancer                          | 52 (20 to 86)                               | 87 (55 to 121)                                                     | 2060 (957 to 3220)                          | 3520 (2390 to 4700)                                                |
| Kidney cancer                               | 70 (29 to 110)                              | 114 (74 to 154)                                                    | 1980 (1080 to 2920)                         | 3320 (2430 to 4300)                                                |
| Pancreatic cancer                           | 88 (38 to 138)                              | 143 (93 to 195)                                                    | 1230 (661 to 1830)                          | 2080 (1480 to 2740)                                                |
| Esophageal adenocarcinoma                   | 76 (21 to 131)                              | 122 (69 to 178)                                                    | 1150 (403 to 1930)                          | 1990 (1210 to 2820)                                                |
| Colorectal cancer                           | 34 (17 to 53)                               | 57 (40 to 77)                                                      | 706 (369 to 1080)                           | 1200 (839 to 1600)                                                 |
| Stomach cancer (cardia)                     | 22 (2 to 48)                                | 40 (19 to 68)                                                      | 541 (230 to 947)                            | 907 (538 to 1400)                                                  |
| Multiple myeloma                            | 18 (8 to 30)                                | 29 (18 to 42)                                                      | 420 (239 to 662)                            | 691 (481 to 980)                                                   |
| Gallbladder cancer                          | 13 (7 to 20)                                | 21 (15 to 28)                                                      | 267 (181 to 369)                            | 436 (341 to 551)                                                   |
| Advanced prostate cancer                    | 9 (3 to 15)                                 | 13 (7 to 19)                                                       | 163 (65 to 280)                             | 273 (163 to 404)                                                   |
| Ovarian cancer                              | 8 (3 to 15)                                 | 13 (7 to 20)                                                       | 107 (39 to 191)                             | 181 (94 to 290)                                                    |
| Thyroid cancer                              | 1 (1 to 2)                                  | 2 (1 to 3)                                                         | 23 (11 to 38)                               | 38 (24 to 58)                                                      |
| Total                                       | 654 (320 to 970)                            | 1080 (746 to 1400)                                                 | 16700 (9610 to 23600)                       | 28200 (21100 to 35300)                                             |

1  
2  
3  
4  
5  
6  
7  
8  
9  
10  
11  
12  
13  
14  
15  
16  
17  
18  
19  
20  
21  
22  
23  
24  
25  
26  
27  
28  
29  
30  
31  
32  
33  
34  
35  
36  
37  
38  
39  
40  
41  
42  
43  
44  
45  
46  
47

|                                                                     |                         |                        |                          |                           |
|---------------------------------------------------------------------|-------------------------|------------------------|--------------------------|---------------------------|
| <b>Life Years Gained</b>                                            | 678 (288 to 1040)       | 1120 (738 to 1490)     | 76400 (43400 to 109000)  | 130000 (96900 to 162000)  |
| <b>QALYs Gained</b>                                                 | 4280 (2170 to 6250)     | 7030 (4960 to 9090)    | 111000 (64800 to 158000) | 189000 (140000 to 236000) |
| <b>Changes in Health-Related Costs (\$, millions)<sup>2,3</sup></b> |                         |                        |                          |                           |
| Healthcare (medical) cost                                           | -192 (-277 to -100)     | -319 (-403 to -227)    | -1480 (-2080 to -884)    | -2500 (-3090 to -1900)    |
| Patient time cost                                                   | -7.33 (-10.9 to -3.56)  | -12.2 (-15.8 to -8.39) | -102 (-144 to -62.2)     | -172 (-216 to -131)       |
| Productivity loss                                                   | -48.7 (-70.1 to -24.5)  | -80.4 (-102 to -56.7)  | -608 (-865 to -363)      | -1030 (-1290 to -780)     |
| <b>Policy Implementation Costs (\$, millions)<sup>2,3</sup></b>     |                         |                        |                          |                           |
| Total                                                               | 518 (493 to 548)        | 644 (612 to 680)       | 839 (780 to 908)         | 1140 (1060 to 1220)       |
| Government cost                                                     | 13.2 (11.4 to 15.9)     | 13.1 (11.4 to 15.7)    | 18.5 (14.5 to 25.1)      | 18.5 (14.4 to 25.5)       |
| Administration                                                      | 9.08 (8.59 to 9.60)     | 9.07 (8.64 to 9.50)    | 9.07 (8.61 to 9.56)      | 9.09 (8.62 to 9.55)       |
| Monitoring                                                          | 4.09 (2.40 to 6.74)     | 4.00 (2.35 to 6.63)    | 9.40 (5.45 to 16.1)      | 9.38 (5.30 to 16.3)       |
| Industry cost                                                       | 505 (480 to 535)        | 631 (599 to 667)       | 820 (762 to 889)         | 1120 (1040 to 1210)       |
| Compliance                                                          | 505 (480 to 535)        | 506 (480 to 533)       | 820 (762 to 889)         | 823 (757 to 889)          |
| Reformulation                                                       | -----                   | 124 (107 to 146)       | -----                    | 296 (249 to 353)          |
| <b>Net Costs (\$, millions)<sup>2,3,4</sup></b>                     |                         |                        |                          |                           |
| Societal perspective                                                | 270 (156 to 389)        | 233 (119 to 356)       | -1350 (-2260 to -486)    | -2570 (-3460 to -1650)    |
| Healthcare perspective                                              | -179 (-263 to -86.3)    | -305 (-390 to -214)    | -1460 (-2060 to -864)    | -2480 (-3070 to -1880)    |
| <b>ICER (dollars/QALY)<sup>5</sup></b>                              |                         |                        |                          |                           |
| Societal perspective                                                | 64500 (26100 to 187000) | 33600 (13300 to 72400) | Dominant                 | Dominant                  |
| Healthcare perspective                                              | Dominant                | Dominant               | Dominant                 | Dominant                  |

Abbreviations: ICER, Incremental Cost-Effectiveness Ratio; QALY, quality-adjusted life years.

1. Values are the median estimates (95% uncertainty intervals) of each distribution of 1000 simulations.

2. Health-related costs were inflated to 2015 US dollars using the Personal Health Care (PHC) index. Policy intervention costs were inflated to 2015 US dollars using the Consumer Price Index. Negative costs represent savings.

3. Costs are medians from 1000 simulations so may not add up to totals.

4. Net costs were calculated as policy costs minus health-related costs from reduced cancer burden. The societal perspective includes healthcare costs, patient time costs, productivity costs, and policy implementation costs; the government perspective included policy costs relevant to policy implementation and program monitoring and evaluation, and medical costs.

5. ICER threshold was evaluated at \$150,000/QALY. Dominant represents less costly and more effective than the "no-policy intervention" scenario.

## 296 **Economic Impacts**

297 Implementing the policy would cost the government \$19 (95% UI: \$15-25) million and the  
298 restaurant industry, \$820 (\$762-889) million in compliance costs over a lifetime (**Table 2**). The  
299 policy was associated with savings of \$1480 (\$884-2080) million in direct medical costs, \$608  
300 (\$363-865) million in productivity loss costs, and \$102 (\$62-144) million in patient time costs.  
301 Potential industry reformulation would cost the restaurant industry an additional \$296 (\$249-  
302 353) million to implement but would also result in greater healthcare savings, including \$2,500  
303 (\$1,900-3,090) million, \$1,030 (\$780-1,290) million and \$172 (\$131-216) million in reduced  
304 direct medical, productivity loss, and patient time costs, respectively.

305  
306 From both the healthcare and social perspectives, implementing the menu calorie labeling policy  
307 among US adults over a lifetime would be cost-saving. With changes in consumer behavior  
308 alone, the net cost savings were estimated to be \$1,460 (\$864-2,060) million and \$1,350 (\$486-  
309 2,260) million from the healthcare and societal perspective, respectively. With additional  
310 industry response, estimated cost savings increased to \$2,480 (\$1,880-3,070) million from the  
311 healthcare perspective and \$2,570 (\$1,650-3,460) million from the societal perspective.

## 313 **Policy Impacts Among Population Subgroups**

314 Among population subgroups, the consumer response to the policy was estimated to result in  
315 greater health gains per 100,000 individuals among adults aged 20-44 years (15 new cancer cases  
316 averted) and 55-64 years (16 new cancer cases averted) than older age groups (aged 65+ years; 6  
317 new cancer cases averted); Hispanic and non-Hispanic Black individuals than Non-Hispanic  
318 White group (22 vs. 9 and 17 vs. 9 new cancer cases averted) (**Table 3**). The numbers of cancer

1  
2  
3 319 deaths averted, life-years and QALYs gained, health-related costs saved, and net costs among  
4  
5 320 population subgroups followed a similar pattern (Supplementary Tables 10-11 and  
6  
7 321 Supplementary Figures 2-5). For instance, the policy was associated with more cancer deaths  
8  
9 322 prevented per 100,000 individuals among younger adults aged 20-44 years than older adults aged  
10  
11 323 65+ years (10 vs. 3 cancer deaths averted) and Hispanic and non-Hispanic Black adults than non-  
12  
13 324 Hispanic White individuals (14 vs. 5 and 11 vs. 5 cancer deaths averted). Adding potential  
14  
15 325 industry reformulations resulted in larger health gains among adults aged 45-54 (128% increase  
16  
17 326 in new cancer cases averted) and non-Hispanic White adults (84% increase in new cancer cases  
18  
19 327 averted).  
20  
21  
22  
23  
24  
25  
26  
27  
28  
29  
30  
31  
32  
33  
34  
35  
36  
37  
38  
39  
40  
41  
42  
43  
44  
45  
46  
47  
48  
49  
50  
51  
52  
53  
54  
55  
56  
57  
58  
59  
60

**Table 3. Estimated new cancer cases and deaths prevented by the federal menu calorie labeling policy in the US by age, sex, and race/ethnicity, over a lifetime<sup>1</sup>**

|                                 | Consumer Behavior     |                                  | Consumer Behavior + Industry Response |                                  |
|---------------------------------|-----------------------|----------------------------------|---------------------------------------|----------------------------------|
|                                 | N (95% UI)            | Per 100,000 individuals (95% UI) | N (95% UI)                            | Per 100,000 individuals (95% UI) |
| <b>New Cancer Cases Averted</b> |                       |                                  |                                       |                                  |
| Age                             |                       |                                  |                                       |                                  |
| 20-44                           | 15700 (6170 to 25100) | 15.0 (5.89 to 24.0)              | 28000 (18000 to 37500)                | 26.7 (17.2 to 35.8)              |
| 45-54                           | 2810 (-2110 to 8030)  | 6.61 (-4.97 to 18.9)             | 6420 (1390 to 11600)                  | 15.1 (3.27 to 27.2)              |
| 55-64                           | 6330 (3540 to 9400)   | 15.7 (8.76 to 23.3)              | 8640 (5790 to 11800)                  | 21.4 (14.3 to 29.1)              |
| ≥65                             | 2740 (795 to 4650)    | 5.77 (1.68 to 9.80)              | 4060 (2070 to 5950)                   | 8.55 (4.36 to 12.6)              |
| Sex                             |                       |                                  |                                       |                                  |
| Female                          | 15100 (6650 to 24000) | 12.5 (5.51 to 19.8)              | 25900 (17400 to 34900)                | 21.4 (14.4 to 28.9)              |
| Male                            | 12500 (4920 to 20100) | 10.9 (4.30 to 17.6)              | 21100 (13500 to 29100)                | 18.4 (11.8 to 25.4)              |
| Race/Ethnicity                  |                       |                                  |                                       |                                  |
| Non-Hispanic White              | 14300 (4310 to 24500) | 9.16 (2.77 to 15.7)              | 26300 (16000 to 36700)                | 16.9 (10.3 to 23.6)              |
| Non-Hispanic Black              | 4720 (1820 to 8100)   | 16.6 (6.37 to 28.4)              | 7630 (4750 to 11100)                  | 26.8 (16.7 to 38.9)              |
| Hispanic                        | 7700 (3560 to 11500)  | 21.5 (9.93 to 32.2)              | 11200 (7060 to 15300)                 | 31.3 (19.7 to 42.6)              |
| Other                           | 1150 (-240 to 2440)   | 7.60 (-1.59 to 16.2)             | 1990 (652 to 3310)                    | 13.2 (4.33 to 22.0)              |
| <b>Cancer Deaths Prevented</b>  |                       |                                  |                                       |                                  |
| Age                             |                       |                                  |                                       |                                  |
| 20-44                           | 10200 (4170 to 16400) | 9.73 (3.98 to 15.7)              | 18100 (11700 to 24500)                | 17.3 (11.2 to 23.4)              |
| 45-54                           | 1730 (-853 to 4240)   | 4.07 (-2.01 to 9.97)             | 3650 (1040 to 6240)                   | 8.58 (2.44 to 14.7)              |
| 55-64                           | 3320 (1760 to 4930)   | 8.21 (4.36 to 12.2)              | 4480 (2890 to 6090)                   | 11.1 (7.15 to 15.1)              |
| ≥65                             | 1200 (285 to 2130)    | 2.53 (0.60 to 4.48)              | 1800 (848 to 2720)                    | 3.79 (1.79 to 5.73)              |
| Sex                             |                       |                                  |                                       |                                  |
| Female                          | 7810 (3290 to 12600)  | 6.47 (2.73 to 10.5)              | 13400 (8850 to 18500)                 | 11.1 (7.33 to 15.3)              |
| Male                            | 8510 (3500 to 13900)  | 7.44 (3.06 to 12.1)              | 14400 (9300 to 20000)                 | 12.6 (8.13 to 17.5)              |
| Race/Ethnicity                  |                       |                                  |                                       |                                  |
| Non-Hispanic White              | 7920 (2180 to 13900)  | 5.08 (1.40 to 8.94)              | 14700 (8770 to 20900)                 | 9.45 (5.64 to 13.5)              |
| Non-Hispanic Black              | 3010 (1000 to 5370)   | 10.6 (3.51 to 18.8)              | 4990 (2950 to 7380)                   | 17.5 (10.4 to 25.9)              |
| Hispanic                        | 4960 (2360 to 7560)   | 13.8 (6.58 to 21.1)              | 7190 (4480 to 9870)                   | 20.0 (12.5 to 27.5)              |
| Other                           | 565 (-246 to 1350)    | 3.75 (-1.63 to 8.97)             | 1070 (273 to 1870)                    | 7.12 (1.81 to 12.4)              |

1. Values are the median estimates (95% uncertainty intervals) of each distribution of 1000 simulations.

## 328 **Sensitivity Analyses**

329 In PSA, based on consumer responses alone, the menu calorie labeling was cost-saving over a  
330 lifetime in 93% of 1000 simulations and cost-effective (<\$150,000/QALY) in the remaining 7%  
331 from the societal perspective, and was cost-saving in over 98% of 1000 simulations from the  
332 healthcare perspective. Adding the additional industry response increased the probability of cost-  
333 savings to nearly 100% of the simulations for both the societal and healthcare perspectives  
334 **(Figure 2).**

335  
336 Evaluating health gains, costs, and cost-effectiveness at 10 years, the policy remained cost-  
337 saving from the healthcare perspective and was cost-effective from the societal perspective, with  
338 an ICER of \$64,500 (26,100-187,000) per QALY based on consumer response alone and  
339 \$33,600 (13,300-72,400) per QALY with additional industry response. The cost-effectiveness of  
340 this policy was most sensitive to varied assumptions of the diet-BMI estimates and annual  
341 discounting rates (Supplementary Tables 12-13 and Supplementary Figure 6).

## 343 **DISCUSSION**

344 This study estimated that the federal menu calorie labeling policy, based on consumer response  
345 alone, was associated with a reduction of approximately 28,000 new cancer cases and 16,700  
346 cancer deaths among US adults over a lifetime, and net savings of \$1,350 and \$1,460 million  
347 from societal and healthcare perspectives, respectively. Incorporating additional modest industry  
348 responses, these health and economic gains were approximately doubled. Greater health gains  
349 were expected among younger, middle-aged subgroups, Hispanic, and non-Hispanic Black



1  
2  
3 350 individuals compared with other subgroups. Findings were robust to a range of probabilistic and  
4  
5 351 one-way sensitivity analyses.  
6  
7

8 352  
9  
10 353 Our study findings supported that nutrition policies can have meaningful health and economic  
11  
12 354 impacts on cancer prevention in the US. In this case, a modest change in mean calorie  
13  
14 355 consumption, distributed across the population, was estimated to achieve important reductions in  
15  
16 356 obesity-related cancer burdens among US adults. Using the best available estimates, our study  
17  
18 357 further suggested that the federal menu calorie labeling policy is cost-effective in the short term  
19  
20 358 and cost-saving in the long term in reducing obesity-associated cancer burdens. Many preventive  
21  
22 359 medical screenings are cost-effective, but none of them achieve net savings. For example, among  
23  
24 360 a large cohort of women born in the 1960s over a lifetime, mammography screening starting at  
25  
26 361 age 45 years was estimated to have an ICER of \$40 135/QALY.<sup>51</sup> Colonoscopy screening  
27  
28 362 starting at age 45 years among U.S. adults achieved an ICER of \$33 900/QALY.<sup>52</sup> Prostate-  
29  
30 363 specific antigen screening had an ICER of \$70 831 to \$136 332/QALY among U.S. males  
31  
32 364 beginning at 40 years of age over a lifetime.<sup>53</sup> In contrast, population-based nutrition  
33  
34 365 interventions could be a cost-saving strategy for cancer prevention. Cost-effectiveness analyses  
35  
36 366 showed that a penny-per-ounce tax on sugar-sweetened beverages would be a highly cost-  
37  
38 367 effective strategy for cancer prevention among US adults, with an ICER of 13 220, the nutrition  
39  
40 368 facts added sugar labeling would prevent 30 000 incident obesity-related cancer cases and 17 100  
41  
42 369 cancer deaths and be associated with a net saving of 704 million, and processed meat taxes  
43  
44 370 would avert 77 000 colorectal cancer cases and 12 500 stomach cancer cases save 4.5 billion, all  
45  
46 371 from the societal perspective.<sup>24 54 55</sup> Thus, while we shall continue the efforts of increasing the  
47  
48  
49  
50  
51  
52  
53  
54  
55  
56  
57  
58  
59

1  
2  
3 372 screening rates, we also need to consider population-based strategies to improve nutrition for  
4  
5 373 cancer prevention in the US.  
6  
7

8 374

9  
10 375 Our findings also indicated the importance of assessing potential industry response, which could  
11  
12 376 nearly double health and economic benefits. The additional impacts of industry reformulation in  
13  
14 377 response to nutrition-related policies have been reported in other studies focused on obesity-  
15  
16 378 associated cancer, diabetes, and cardiovascular diseases.<sup>23 55-57</sup> Our new findings build on this  
17  
18 379 recent work and highlight the importance of potential strategies to encourage industry  
19  
20 380 reformulation under the federal menu calorie labeling framework to further improve the health  
21  
22 381 benefits and cost-effectiveness of such policies.  
23  
24

25  
26 382

27  
28 383 In addition, our results showed that population-based nutrition policies such as menu calorie  
29  
30 384 labeling can potentially narrow diet-associated cancer disparities. We found greater health gains  
31  
32 385 and economic impacts among racial/ethnic minorities compared to non-Hispanic whites, likely  
33  
34 386 due to higher diet-associated cancer burdens among minorities.<sup>58</sup> However, labeling policies may  
35  
36 387 have fewer effects on food purchasing behaviors among minorities or socioeconomically  
37  
38 388 disadvantaged groups. Prior studies reported that individuals with higher education and income  
39  
40 389 attainment were more likely to notice and use the menu calorie labels when ordering foods in  
41  
42 390 fast-food or full-service restaurants compared to socioeconomically disadvantaged groups,<sup>59-61</sup>  
43  
44 391 and multi-racial individuals were less likely to notice and use menu calorie labels in fast food  
45  
46 392 restaurants than non-Hispanic whites.<sup>59</sup> Previous studies also showed that literacy or numeracy  
47  
48 393 could be a barrier to label use.<sup>62 63</sup> Thus, it is important for labeling policies to be paired with  
49  
50 394 nutrition education to effectively reduce diet-associated health disparities.  
51  
52  
53  
54  
55  
56  
57  
58  
59  
60

1  
2  
3 395  
4  
5 396 Potential limitations should be considered. First, as a modeling study, our investigation does not  
6  
7  
8 397 provide the impact of real-world policy implementation on the health and economic outcomes of  
9  
10 398 federal menu calorie labeling. However, conducting randomized controlled trials of national  
11  
12 399 nutrition policy interventions is extremely difficult and often implausible while simulation  
13  
14 400 modeling can provide complementary evidence with the flexibility to assess different policy  
15  
16 401 scenarios that help inform policymaking. Second, this evaluation did not include the potential  
17  
18 402 benefits of menu calorie labeling on other health outcomes such as diabetes and cardiovascular  
19  
20 403 diseases. Considering such outcomes is likely to be associated with greater health gains and cost  
21  
22 404 savings.<sup>23 64 65</sup> Third, menu calorie labeling could have a greater effect among subgroups with  
23  
24 405 higher levels of income and education and non-Hispanic white adults<sup>59-61</sup> and thus exacerbating  
25  
26 406 health disparities. Due to the lack of consistent policy effect sizes among populations with  
27  
28 407 different socioeconomic statuses, we were unable to integrate this into our modeling. Forth, we  
29  
30 408 only modeled the impact of menu calorie labeling on calories although the policy may also result  
31  
32 409 in potential changes in the nutritional quality of the restaurant meals. The majority of current  
33  
34 410 restaurant meals consumed by American adults – 70% of meals consumed from fast-food  
35  
36 411 restaurants and 50% consumed from full-service restaurants – are of poor nutritional quality, and  
37  
38 412 the remainder is only of intermediate nutritional quality, with very few being ideal.<sup>10</sup> If the  
39  
40 413 policy also improves the quality of restaurant meals, the total reduction in obesity-associated  
41  
42 414 cancer burdens could be greater than our current estimates.  
43  
44  
45  
46  
47  
48  
49 415  
50

## 51 416 **CONCLUSIONS**

52  
53  
54  
55  
56  
57  
58  
59  
60

1  
2  
3 417 Study findings suggest that menu calorie labeling is associated with lower obesity-related cancer  
4  
5 418 rates and reduced costs. Policymakers may prioritize nutrition policies for cancer prevention in  
6  
7 419 the US.  
8  
9  
10  
11  
12  
13  
14  
15  
16  
17  
18  
19  
20  
21  
22  
23  
24  
25  
26  
27  
28  
29  
30  
31  
32  
33  
34  
35  
36  
37  
38  
39  
40  
41  
42  
43  
44  
45  
46  
47  
48  
49  
50  
51  
52  
53  
54  
55  
56  
57  
58  
59  
60

For peer review only

1  
2  
3 **Ethics approval:** This study used de-identified datasets and was exempt from institutional  
4 review board review.  
5

6  
7 **Data sharing:** Data described in the manuscript, codebook, and analytic code will be made  
8 available upon request.  
9

10  
11 **Transparency Statement:** The author affirms that this manuscript is an honest, accurate, and  
12 transparent account of the study being reported; that no important aspects of the study have been  
13 omitted; and that any discrepancies from the study as planned have been explained.  
14

15  
16 **Dissemination Declaration:** Dissemination to the simulated population is not applicable.  
17

18  
19 **Contributors:** MD contributed to the data curation, formal analysis, visualization, original draft  
20 preparation, review and editing; CFG contributed to the data curation, review and editing; FFC,  
21 HE and DDK contributed to software; JBW, PW, DDK, DSM, YCW, and DM contributed to the  
22 review and editing; FFZ contributed the conceptualization, methodology, review and editing,  
23 supervision, and funding acquisition. All authors approved the final version. FFZ acts as the  
24 guarantor of the study.  
25

26  
27 **Role of the funding source:** This study was supported by NIH/NIMHD 1R01MD011501. The  
28 funding sources had no role in the design or conduct of the study; collection, management,  
29 analysis, or interpretation of the data; preparation, review, or approval of the manuscript; or  
30 decision to submit the manuscript for publication.  
31

32  
33 **Competing interests:** All authors have completed the ICMJE uniform disclosure form at  
34 [www.icmje.org/coi\\_disclosure.pdf](http://www.icmje.org/coi_disclosure.pdf) and declare: no support from any organization for the  
35 submitted work. JBW reports leadership or fiduciary role in the US Preventive Services Task  
36 Force. DK reports research funding from the National Institutes of Health, Arnold Ventures,  
37 Pharmaceutical Research and Manufacturers of America, Sarepta Therapeutics, and Janssen  
38  
39  
40  
41  
42  
43  
44  
45  
46  
47  
48  
49  
50  
51  
52  
53  
54  
55  
56  
57  
58  
59  
60

1  
2  
3 Therapeutics; consulting fees from Panalgo and the American College of Physicians. DM reports  
4  
5 research funding from the National Institutes of Health, Gates Foundation, Rockefeller  
6  
7 Foundation, and Vail Institute for Global Research; consulting fees from Acasti Pharma, Barilla,  
8  
9 Danone, and Motif FoodWorks; participating on scientific advisory boards of start-up companies  
10  
11 focused on innovations for health including Beren Therapeutics Brightseed, Calibrate, DayTwo,  
12  
13 Elysium Health, Filtricine, Foodome, HumanCo, January Inc., Perfect Day, Season, and Tiny  
14  
15 Organics; and chapter royalties from UpToDate. All of the above is outside the submitted work.  
16  
17  
18  
19 No other relationships or activities could appear to have influenced the submitted work.  
20  
21  
22  
23  
24  
25  
26  
27  
28  
29  
30  
31  
32  
33  
34  
35  
36  
37  
38  
39  
40  
41  
42  
43  
44  
45  
46  
47  
48  
49  
50  
51  
52  
53  
54  
55  
56  
57  
58  
59  
60

## REFERENCES

1. Lauby-Secretan B, Scoccianti C, Loomis D, et al. Body Fatness and Cancer--Viewpoint of the IARC Working Group. *The New England journal of medicine* 2016;375(8):794-8. doi: 10.1056/NEJMsr1606602 [published Online First: 2016/08/25]
2. World Cancer Research Fund/American Institute for Cancer Research. Continuous Update Project Expert Report 2018. Body fatness and weight gain and the risk of cancer, 2018.
3. Steele CB, Thomas CC, Henley SJ, et al. Vital Signs: Trends in Incidence of Cancers Associated with Overweight and Obesity - United States, 2005-2014. *MMWR Morbidity and mortality weekly report* 2017;66(39):1052-58. doi: 10.15585/mmwr.mm6639e1 [published Online First: 2017/10/06]
4. Fryar CD, Carroll MD, Ogden CL. Prevalence of overweight, obesity, and severe obesity among children and adolescents aged 2–19 years: United States, 1963–1965 through 2015–2016. 2018
5. Hales CM, Fryar CD, Carroll MD, et al. Trends in obesity and severe obesity prevalence in US youth and adults by sex and age, 2007-2008 to 2015-2016. *Jama* 2018;319(16):1723-25.
6. Centers for Disease Control and Prevention NcfcDPaHP. Health and Economic Cost of Chronic Diseases 2019 [Available from: <https://www.cdc.gov/chronicdisease/about/costs/index.htm> accessed January 26 2020.
7. Hong YR, Huo J, Desai R, et al. Excess Costs and Economic Burden of Obesity-Related Cancers in the United States. *Value in health : the journal of the International Society for Pharmacoeconomics and Outcomes Research* 2019;22(12):1378-86. doi: 10.1016/j.jval.2019.07.004 [published Online First: 2019/12/07]
8. Koroukian SM, Dong W, Berger NA. Changes in Age Distribution of Obesity-Associated Cancers. *JAMA Netw Open* 2019;2(8):e199261. doi: 10.1001/jamanetworkopen.2019.9261 [published Online First: 2019/08/15]
9. Rock CL, Thomson C, Gansler T, et al. American Cancer Society guideline for diet and physical activity for cancer prevention. *CA Cancer J Clin* 2020;70(4):245-71. doi: 10.3322/caac.21591 [published Online First: 2020/06/10]
10. Liu J, Rehm CD, Micha R, et al. Quality of Meals Consumed by US Adults at Full-Service and Fast-Food Restaurants, 2003-2016: Persistent Low Quality and Widening Disparities. *J Nutr* 2020:nxz299. doi: 10.1093/jn/nxz299
11. Roberts SB, Das SK, Suen VMM, et al. Measured energy content of frequently purchased restaurant meals: multi-country cross sectional study. *BMJ (Clinical research ed)* 2018;363:k4864. doi: 10.1136/bmj.k4864 [published Online First: 2018/12/14]
12. Wolfson JA, Bleich SN. Is cooking at home associated with better diet quality or weight-loss intention? *Public Health Nutr* 2015;18(8):1397-406. doi: 10.1017/s1368980014001943 [published Online First: 2014/11/17]
13. Food and Drug Administration. Food Labeling; Nutrition Labeling of Standard Menu Items in Restaurants and Similar Retail Food Establishments; Calorie Labeling of Articles of Food in Vending Machines; Final Rule In: Department of Health and Human Services, ed., 2014.
14. Petimar J, Zhang F, Cleveland LP, et al. Estimating the effect of calorie menu labeling on calories purchased in a large restaurant franchise in the southern United States: quasi-experimental study. *BMJ (Clinical research ed)* 2019;367:l5837-l37. doi: 10.1136/bmj.l5837

15. Shangguan S, Afshin A, Shulkin M, et al. A Meta-Analysis of Food Labeling Effects on Consumer Diet Behaviors and Industry Practices. *American journal of preventive medicine* 2019;56(2):300-14. doi: 10.1016/j.amepre.2018.09.024 [published Online First: 2018/12/24]
16. Block JP, Roberto CA. Potential benefits of calorie labeling in restaurants. *Jama* 2014;312(9):887-88. doi: 10.1001/jama.2014.9239
17. Namba A, Auchincloss A, Leonberg BL, et al. Exploratory analysis of fast-food chain restaurant menus before and after implementation of local calorie-labeling policies, 2005-2011. *Preventing chronic disease* 2013;10:E101-E01. doi: 10.5888/pcd10.120224
18. Bleich SN, Wolfson JA, Jarlenski MP. Calorie changes in large chain restaurants from 2008 to 2015. *Preventive medicine* 2017;100:112-16. doi: 10.1016/j.ypmed.2017.04.004 [published Online First: 2017/04/09]
19. Bleich SN, Moran AJ, Jarlenski MP, et al. Higher-Calorie Menu Items Eliminated in Large Chain Restaurants. *American journal of preventive medicine* 2018;54(2):214-20. doi: 10.1016/j.amepre.2017.11.004 [published Online First: 2017/12/16]
20. Bleich SN, Wolfson JA, Jarlenski MP. Calorie Changes in Large Chain Restaurants: Declines in New Menu Items but Room for Improvement. *American journal of preventive medicine* 2016;50(1):e1-e8. doi: 10.1016/j.amepre.2015.05.007 [published Online First: 2015/07/07]
21. Bleich SN, Wolfson JA, Jarlenski MP, et al. Restaurants With Calories Displayed On Menus Had Lower Calorie Counts Compared To Restaurants Without Such Labels. *Health affairs (Project Hope)* 2015;34(11):1877-84. doi: 10.1377/hlthaff.2015.0512
22. Ananthapavan J, Sacks G, Brown V, et al. Priority-setting for obesity prevention-The Assessing Cost-Effectiveness of obesity prevention policies in Australia (ACE-Obesity Policy) study. *PloS one* 2020;15(6):e0234804. doi: 10.1371/journal.pone.0234804 [published Online First: 2020/06/20]
23. Liu J, Mozaffarian D, Sy S, et al. Health and Economic Impacts of the National Menu Calorie Labeling Law in the United States: A Microsimulation Study. *Circ Cardiovasc Qual Outcomes* 2020;13(6):e006313. doi: 10.1161/circoutcomes.119.006313 [published Online First: 2020/06/05]
24. Kim DD, Wilde PE, Michaud DS, et al. Cost Effectiveness of Nutrition Policies on Processed Meat: Implications for Cancer Burden in the U.S. *American journal of preventive medicine* 2019 doi: 10.1016/j.amepre.2019.02.023 [published Online First: 2019/10/01]
25. Kim DD, Wilde PE, Michaud DS, et al. Cost Effectiveness of Nutrition Policies on Processed Meat: Implications for Cancer Burden in the U.S. *American Journal of Preventive Medicine*, 2019.
26. United States Census Bureau. 2017 National Population Projections Tables: Main Series [Available from: <https://www.census.gov/data/tables/2017/demo/popproj/2017-summary-tables.html> accessed July 3 2019.
27. Freedman LS, Midthune D, Carroll RJ, et al. Adjustments to improve the estimation of usual dietary intake distributions in the population. *J Nutr* 2004;134(7):1836-43. doi: 10.1093/jn/134.7.1836 [published Online First: 2004/07/01]
28. Herrick KA, Rossen LM, Parsons R, et al. Estimating Usual Dietary In take From National Health and Nutrition Examination Survey Data Using the National Cancer Institute Method. *Vital and health statistics Series 2, Data evaluation and methods research* 2018(178):1-63. [published Online First: 2018/05/19]



- 1  
2  
3 29. Dodd KW, Guenther PM, Freedman LS, et al. Statistical methods for estimating usual intake  
4 of nutrients and foods: a review of the theory. *Journal of the American Dietetic*  
5 *Association* 2006;106(10):1640-50. doi: 10.1016/j.jada.2006.07.011 [published Online  
6 First: 2006/09/27]  
7  
8 30. Hall KD, Sacks G, Chandramohan D, et al. Quantification of the effect of energy imbalance  
9 on bodyweight. *Lancet (London, England)* 2011;378(9793):826-37. doi: 10.1016/s0140-  
10 6736(11)60812-x [published Online First: 2011/08/30]  
11  
12 31. Hall KD, Schoeller DA, Brown AW. Reducing Calories to Lose Weight. *Jama*  
13 2018;319(22):2336-37. doi: 10.1001/jama.2018.4257 [published Online First:  
14 2018/06/14]  
15  
16 32. Mozaffarian D, Hao T, Rimm EB, et al. Changes in diet and lifestyle and long-term weight  
17 gain in women and men. *The New England journal of medicine* 2011;364(25):2392-404.  
18 doi: 10.1056/NEJMoa1014296 [published Online First: 2011/06/24]  
19  
20 33. Micha R, Penalvo JL, Cudhea F, et al. Association Between Dietary Factors and Mortality  
21 From Heart Disease, Stroke, and Type 2 Diabetes in the United States. *Jama*  
22 2017;317(9):912-24. doi: 10.1001/jama.2017.0947 [published Online First: 2017/03/08]  
23  
24 34. Mariotto AB, Yabroff KR, Shao Y, et al. Projections of the cost of cancer care in the United  
25 States: 2010-2020. *Journal of the National Cancer Institute* 2011;103(2):117-28. doi:  
26 10.1093/jnci/djq495 [published Online First: 2011/01/14]  
27  
28 35. United States Census Bureau. 2014 National Population Projections Tables [Available from:  
29 <https://www.census.gov/data/tables/2014/demo/popproj/2014-summary-tables.html>  
30 accessed July 3 2019].  
31  
32 36. Brenner H. Long-term survival rates of cancer patients achieved by the end of the 20th  
33 century: a period analysis. *Lancet (London, England)* 2002;360(9340):1131-5. doi:  
34 10.1016/s0140-6736(02)11199-8 [published Online First: 2002/10/22]  
35  
36 37. Brenner H, Hakulinen T. Up-to-date and precise estimates of cancer patient survival: model-  
37 based period analysis. *American journal of epidemiology* 2006;164(7):689-96. doi:  
38 10.1093/aje/kwj243 [published Online First: 2006/07/15]  
39  
40 38. Brenner H, Hakulinen T. Up-to-date cancer survival: period analysis and beyond.  
41 *International journal of cancer* 2009;124(6):1384-90. doi: 10.1002/ijc.24021 [published  
42 Online First: 2008/12/06]  
43  
44 39. Food and Drug Administration. Justification of Estimates for Appropriations Committees  
45 Fiscal Year 2012, 2012.  
46  
47 40. Food and Drug Administration. The Nutrition Review Project. Report to the Director, Center  
48 for Food Safety and Applied Nutrition, 2014.  
49  
50 41. Martin AB, Hartman M, Washington B, et al. National Health Care Spending In 2017:  
51 Growth Slows To Post-Great Recession Rates; Share Of GDP Stabilizes. *Health affairs*  
52 *(Project Hope)* 2019;38(1):101377hlthaff201805085. doi: 10.1377/hlthaff.2018.05085  
53 [published Online First: 2018/12/07]  
54  
55 42. French EB, McCauley J, Aragon M, et al. End-Of-Life Medical Spending In Last Twelve  
56 Months Of Life Is Lower Than Previously Reported. *Health affairs (Project Hope)*  
57 2017;36(7):1211-17. doi: 10.1377/hlthaff.2017.0174 [published Online First: 2017/07/07]  
58  
59 43. Hogan C, Lunney J, Gabel J, et al. Medicare beneficiaries' costs of care in the last year of  
60 life. *Health affairs (Project Hope)* 2001;20(4):188-95. doi: 10.1377/hlthaff.20.4.188  
[published Online First: 2001/07/21]

- 1  
2  
3  
4 44. Yabroff KR, Davis WW, Lamont EB, et al. Patient time costs associated with cancer care.  
5 *Journal of the National Cancer Institute* 2007;99(1):14-23. doi: 10.1093/jnci/djk001  
6 [published Online First: 2007/01/05]
- 7 45. Yabroff KR, Guy GP, Jr., Ekwueme DU, et al. Annual patient time costs associated with  
8 medical care among cancer survivors in the United States. *Medical care* 2014;52(7):594-  
9 601. doi: 10.1097/mlr.000000000000151 [published Online First: 2014/06/14]
- 10 46. Zheng Z, Yabroff KR, Guy GP, Jr., et al. Annual Medical Expenditure and Productivity Loss  
11 Among Colorectal, Female Breast, and Prostate Cancer Survivors in the United States.  
12 *Journal of the National Cancer Institute* 2016;108(5) doi: 10.1093/jnci/djv382 [published  
13 Online First: 2015/12/26]
- 14 47. Guy GP, Jr., Ekwueme DU, Yabroff KR, et al. Economic burden of cancer survivorship  
15 among adults in the United States. *Journal of clinical oncology : official journal of the*  
16 *American Society of Clinical Oncology* 2013;31(30):3749-57. doi:  
17 10.1200/jco.2013.49.1241 [published Online First: 2013/09/18]
- 18 48. Sanders GD, Neumann PJ, Basu A, et al. Recommendations for Conduct, Methodological  
19 Practices, and Reporting of Cost-effectiveness Analyses: Second Panel on Cost-  
20 Effectiveness in Health and Medicine. *Jama* 2016;316(10):1093-103. doi:  
21 10.1001/jama.2016.12195 [published Online First: 2016/09/14]
- 22 49. Neumann PJ, Cohen JT, Weinstein MC. Updating cost-effectiveness--the curious resilience  
23 of the \$50,000-per-QALY threshold. *The New England journal of medicine*  
24 2014;371(9):796-7. doi: 10.1056/NEJMp1405158 [published Online First: 2014/08/28]
- 25 50. Greenberg D, Earle C, Fang CH, et al. When is cancer care cost-effective? A systematic  
26 overview of cost-utility analyses in oncology. *Journal of the National Cancer Institute*  
27 2010;102(2):82-8. doi: 10.1093/jnci/djp472 [published Online First: 2010/01/09]
- 28 51. Tina Shih YC, Dong W, Xu Y, et al. Assessing the Cost-Effectiveness of Updated Breast  
29 Cancer Screening Guidelines for Average-Risk Women. *Value in health : the journal of*  
30 *the International Society for Pharmacoeconomics and Outcomes Research*  
31 2019;22(2):185-93. doi: 10.1016/j.jval.2018.07.880 [published Online First: 2019/02/04]
- 32 52. Ladabaum U, Mannalithara A, Meester RGS, et al. Cost-Effectiveness and National Effects  
33 of Initiating Colorectal Cancer Screening for Average-Risk Persons at Age 45 Years  
34 Instead of 50 Years. *Gastroenterology* 2019;157(1):137-48. doi:  
35 10.1053/j.gastro.2019.03.023 [published Online First: 2019/04/02]
- 36 53. Roth JA, Gulati R, Gore JL, et al. Economic Analysis of Prostate-Specific Antigen Screening  
37 and Selective Treatment Strategies. *JAMA oncology* 2016;2(7):890-8. doi:  
38 10.1001/jamaoncol.2015.6275 [published Online First: 2016/03/25]
- 39 54. Du M, Griecci CF, Kim DD, et al. Cost-Effectiveness of a National Sugar-Sweetened  
40 Beverage Tax to Reduce Cancer Burden and Disparities in the United States. *JNCI*  
41 *Cancer Spectrum* 2020
- 42 55. Du M, Griecci CF, Cudhea FF, et al. Cost-effectiveness Analysis of Nutrition Facts Added-  
43 Sugar Labeling and Obesity-Associated Cancer Rates in the US. *JAMA Network Open*  
44 2021;4(4):e217501-e01. doi: 10.1001/jamanetworkopen.2021.7501
- 45 56. Wilde P, Huang Y, Sy S, et al. Cost-Effectiveness of a US National Sugar-Sweetened  
46 Beverage Tax With a Multistakeholder Approach: Who Pays and Who Benefits. *Am J*  
47 *Public Health* 2019;109(2):276-84. doi: 10.2105/AJPH.2018.304803 [published Online  
48 First: 2018/12/20]
- 49  
50  
51  
52  
53  
54  
55  
56  
57  
58  
59  
60

- 1  
2  
3 57. Huang Y, Kypridemos C, Liu J, et al. Cost-Effectiveness of the US Food and Drug  
4 Administration Added Sugar Labeling Policy for Improving Diet and Health. *Circulation*  
5 2019;139(23):2613-24. doi: 10.1161/CIRCULATIONAHA.118.036751 [published  
6 Online First: 2019/04/15]  
7  
8 58. Zhang FF, Cudhea F, Shan Z, et al. Preventable Cancer Burden Associated With Poor Diet in  
9 the United States. *JNCI Cancer Spectr* 2019;3(2):pkz034. doi: 10.1093/jncics/pkz034  
10 [published Online First: 2019/07/31]  
11  
12 59. Feng W, Fox A. Menu labels, for better, and worse? Exploring socio-economic and race-  
13 ethnic differences in menu label use in a national sample. *Appetite* 2018;128:223-32. doi:  
14 10.1016/j.appet.2018.06.015 [published Online First: 2018/06/13]  
15  
16 60. Green JE, Brown AG, Ohri-Vachaspati P. Sociodemographic disparities among fast-food  
17 restaurant customers who notice and use calorie menu labels. *Journal of the Academy of*  
18 *Nutrition and Dietetics* 2015;115(7):1093-101. doi: 10.1016/j.jand.2014.12.004  
19 [published Online First: 2015/02/11]  
20  
21 61. Lee-Kwan SH, Pan L, Maynard LM, et al. Factors Associated with Self-Reported Menu-  
22 Labeling Usage among US Adults. *Journal of the Academy of Nutrition and Dietetics*  
23 2016;116(7):1127-35. doi: 10.1016/j.jand.2015.12.015 [published Online First:  
24 2016/02/10]  
25  
26 62. Malloy-Weir L, Cooper M. Health literacy, literacy, numeracy and nutrition label  
27 understanding and use: a scoping review of the literature. *J Hum Nutr Diet*  
28 2017;30(3):309-25. doi: 10.1111/jhn.12428 [published Online First: 2016/10/13]  
29  
30 63. Nogueira LM, Thai CL, Nelson W, et al. Nutrition Label Numeracy: Disparities and  
31 Association with Health Behaviors. *American journal of health behavior* 2016;40(4):427-  
32 36. doi: 10.5993/ajhb.40.4.4 [published Online First: 2016/06/25]  
33  
34 64. Gortmaker SL, Wang YC, Long MW, et al. Three Interventions That Reduce Childhood  
35 Obesity Are Projected To Save More Than They Cost To Implement. *Health affairs*  
36 *(Project Hope)* 2015;34(11):1932-9. doi: 10.1377/hlthaff.2015.0631 [published Online  
37 First: 2015/11/04]  
38  
39 65. Kuo T, Jarosz CJ, Simon P, et al. Menu labeling as a potential strategy for combating the  
40 obesity epidemic: a health impact assessment. *Am J Public Health* 2009;99(9):1680-86.  
41 doi: 10.2105/AJPH.2008.153023 [published Online First: 2009/07/16]  
42  
43  
44  
45  
46  
47  
48  
49  
50  
51  
52  
53  
54  
55  
56  
57  
58  
59  
60

1  
2  
3 **Figure 1.** Estimated New Cancer Cases and Deaths Prevented by Federal Menu Calorie Labeling Policy  
4  
5 in the US by Cancer Type over a Lifetime  
6  
7

8  
9  
10 **Figure 2.** Probabilistic Sensitivity Analyses (PSA) for Cost-Effectiveness of the Federal Menu Calorie  
11  
12 Labeling Policy over 10 years and a Lifetime  
13

14 **Legend:** Values are presented in cost-effectiveness planes of net costs (\$millions) versus incremental  
15  
16 quality-adjusted life years (QALYs). For each policy scenario, each colored dot represents one of the  
17  
18 1000 simulations, with the largest dot showing the median incremental cost-effectiveness ratio (ICER,  
19  
20 \$/QALY); and the ellipse representing the 95% UIs. Results are presented from the societal perspective  
21  
22 and the healthcare perspective. Negative values indicate cost savings.  
23  
24  
25  
26  
27  
28  
29  
30  
31  
32  
33  
34  
35  
36  
37  
38  
39  
40  
41  
42  
43  
44  
45  
46  
47  
48  
49  
50  
51  
52  
53  
54  
55  
56  
57  
58  
59  
60



**Figure 1. Estimated New Cancer Cases and Deaths Prevented by Federal Menu Calorie Labeling Policy in the US by Cancer Type over a Lifetime**



Values are presented in cost-effectiveness planes of net costs (\$millions) versus incremental quality-adjusted life years (QALYs). For each policy scenario, each colored dot represents one of the 1000 simulations, with the largest dot showing the median incremental cost-effectiveness ratio (ICER, \$/QALY); and the ellipse representing the 95% UIs. Results are presented from the societal perspective and the healthcare perspective. Negative values indicate cost savings.

**Figure 2. Probabilistic Sensitivity Analyses (PSA) for Cost-Effectiveness of the Federal Menu Calorie Labeling Policy over 10 years and a Lifetime**

1  
2  
3 **Title** Cost-Effectiveness Analysis of the Federal Menu Calorie Labeling and Obesity-Associated Cancer  
4 Burdens in the United States  
5

6  
7 **Appendix 1.** Estimate the Association Between Menu Calorie Labeling Policy and Calorie Intake from  
8 Restaurant Meals

9 **Appendix Table 1.** Policy impact of menu calorie labeling on consumer behaviors

10 **Appendix Table 2.** Policy impact of menu calorie labeling on restaurant industry response

11 **Appendix 2.** Baseline Cancer Incidence and Methods of Cancer Incidence Projections for 13 Types of  
12 Cancers  
13

14 **Appendix Table 3.** Estimating “crude” incidence after applying the cohort-period method

15 **Appendix 3.** Cancer Survival for 13 Types of Cancers

16 **Appendix Table 4.** Period Method for 5-Year Relative Survival for 2014

17 **Appendix 4.** Methods of Estimating the Health-Related Quality of Life Among 13 Types of Cancers

18 **Appendix 5.** Methods of Estimating Policy Implementation Costs

19 **Appendix Table 5.** Implementation Cost Estimates for the Federal Menu Calorie Labeling Policy (in  
20 2015 US Dollars)

21 **Appendix Table 6.** The Population Size of People Who are Alive Each Year Over a Lifetime (in  
22 millions)  
23

24 **Appendix 6.** Annual Health-Related Costs Among Cancer Patients and the General Population without  
25 Cancer  
26

27 **Appendix Table 7.** Description of Data Source of Health-Related Expenditures  
28  
29  
30  
31  
32  
33  
34  
35  
36  
37  
38  
39  
40  
41  
42  
43  
44  
45  
46  
47  
48  
49  
50  
51  
52  
53  
54  
55  
56  
57  
58  
59  
60

## Appendix 1. Estimate the association between menu calorie labeling policy and calorie intake from restaurant meals

To understand the effects of the federal menu calorie labeling policy, we performed a comprehensive literature search and reviewed the evidence on how the policy affected consumer behaviors and industry.

To estimate the policy effect on consumer behavior alone, we reviewed individual studies in both real-world and experimental settings as well as meta-analyses (**Appendix Table 1**). A meta-analysis of natural experimental studies showed that menu calorie labeling was associated with a 7.3% (95% CI: 4.4% to 10.1%) reduction in calories per meal consumed/purchased.<sup>1</sup> This effect estimate is corresponding to an average reduction of 23.5 kcal per meal consumed by NHANES participants from 56.5% of full-service restaurants<sup>2</sup> and all fast-food restaurants. This estimate was consistent with evidence from a previous meta-analysis and a recent real-world study.<sup>3,4</sup> A previous meta-analysis estimated that the menu calorie labeling would lead to about an 18 kcal reduction ordered per meal.<sup>3</sup> A recent longitudinal study used data from a large restaurant franchise in the southern U.S. and estimated that, after labeling implementation, a decrease of 60 kcal per transaction was observed in the first year, followed by an increasing trend of 0.71 kcal per transaction per week over two years.<sup>4</sup> These together attenuated the calorie reduction to 23 kcal per transaction by the end of the third year of the policy implementation.<sup>5</sup> Compared to other studies, the 7.3% calorie reduction per meal represents a more conservative estimate. It was reported in a cross-sectional study that customers at the labeled full-service restaurants purchased food with 151 fewer calories.<sup>6</sup> One meta-analysis of studies that evaluated energy ordered in a real-world setting showed that the calorie labeling policy would lead to a mean reduction of 77.8 in calories purchased per meal.<sup>7</sup> In a laboratory setting, there was a significant reduction of 115.3 kcal per meal ordered.<sup>8</sup> Integrating both the real-world and experimental studies, the policy was



1  
2  
3 estimated to generate a significant reduction of 100.3 in calories purchased.<sup>7</sup> Therefore, we decided to  
4 use a reduction of calorie intake per meal by 7.3% (95% CI: 4.4% to 10.1%) as the model input given it  
5 is the most updated and conservative estimate supported by existing evidence. This policy effect on  
6 consumer behavior alone was assumed to take effect during the first year of implementation and no  
7 further reduction thereafter.  
8  
9

10  
11  
12  
13  
14 Based on the published literature, we estimated that there was a 5% reduction in calories  
15 consumed per meal from chain restaurants due to industry reformulation, the introduction of new low-  
16 calorie menu items, or the replacement of menu items high in calories with low-calorie menu options.<sup>9-  
17 13</sup> Bleich et al. estimated the calorie changes in chain restaurants' menu items using data from the largest  
18 chain restaurants in the U.S.<sup>9-13</sup> Using the estimated mean calorie per menu item from the two published  
19 studies shown in **Appendix Table 2**,<sup>11, 12</sup> we calculated the mean change in calories per menu item  
20 before and after the policy implementation. Given the national law was announced in 2010, using data  
21 from the trend analysis, we treated the mean calorie per menu item measured in 2008 as the baseline and  
22 found there was an 11% reduction in calories per menu item two years after the affordable care act was  
23 enacted. The change decreased to 7% in 2015, one year after the FDA announced the final rule for the  
24 industry to comply with. In the study evaluated the calorie content in current menu items, eliminated  
25 menu items, and newly introduced menu items, we estimated that there was a 1% reduction in mean per-  
26 item calories in 2013-2014 compared to that in 2012, and the reduction increased to 5% in 2015. Based  
27 on this de novo analysis, we chose a reduction in calories per meal consumed by 5% to represent a  
28 modest industry reformulation in response to the federal menu calorie labeling by chain restaurants. We  
29 assumed no industry response in the first year, then the reformulation activities would occur in the rest  
30 of the years over the model lifetime, resulting in a net reduction of 5% in calories consumed per meal.  
31  
32  
33  
34  
35  
36  
37  
38  
39  
40  
41  
42  
43  
44  
45  
46  
47  
48  
49  
50  
51  
52  
53  
54  
55  
56  
57  
58  
59  
60

**Appendix Table 1.** Policy impact of menu calorie labeling on consumer behaviors

| Study                                                                                                                                                                                                  | Design                                                                                                                                                                                                               | Year, country                                                                                      | Estimate size mean (95% CI)                                                                                                                                                                                                              | Comment                                                                                                                                               |
|--------------------------------------------------------------------------------------------------------------------------------------------------------------------------------------------------------|----------------------------------------------------------------------------------------------------------------------------------------------------------------------------------------------------------------------|----------------------------------------------------------------------------------------------------|------------------------------------------------------------------------------------------------------------------------------------------------------------------------------------------------------------------------------------------|-------------------------------------------------------------------------------------------------------------------------------------------------------|
| Shangguan et. al., 2019 <sup>1</sup><br><br>A Meta-Analysis of Food Labeling Effects on Consumer Diet Behaviors and Industry Practices                                                                 | Meta-analysis<br><br>13 studies (5 RCTs) with 19 interventions on changes in calorie intake per meal, among children and adults                                                                                      | 2000 to 2015, US, Canada, UK, Sweden                                                               | -7.3% (-10.1%, -4.4%) in calorie intake per meal                                                                                                                                                                                         | Corresponds to a 23.5 kcal per meal consumed by NHANES participants from 56.5% of full-service restaurants <sup>2</sup> and all fast-food restaurants |
| Petimar et. al., 2019 <sup>4</sup><br><br>Estimating the effect of calorie menu labeling on calories purchased in a large restaurant franchise in the southern United States: quasi-experimental study | Quasi-experimental longitudinal study<br><br>Transaction data from 104 restaurants of a national fast food company with three different restaurant chains located in the Louisiana, Texas, and Mississippi in the US | 2015 to 2018 (pre-labeling: April 2015 to April 2017; post-labeling: April 2017 to April 2018), US | -60 (-48, -72) kcal in calorie purchased per transaction, followed by a post-implementation increasing trend of 0.71 kcal per transaction per week                                                                                       | Because of the post-implementation increase, the estimated reduction in calorie per transaction was 23 kcal lower than the counterfactual.            |
| Cantu-Jungles et. al., 2017 <sup>8</sup><br><br>A Meta-Analysis to Determine the Impact of Restaurant Menu Labeling on Calories and Nutrients (Ordered or Consumed) in U.S. Adults                     | Meta-analysis<br><br>14 studies that evaluated menu calorie labeling on changes in calorie chosen in laboratory and away-from-home settings, among children and adults                                               | 1996 to 2014                                                                                       | -115.2 (-130.87, -99.5) kcal in calorie ordered or consumed per meal in laboratory setting                                                                                                                                               | N/A                                                                                                                                                   |
| Littlewood et. al., 2016 <sup>7</sup><br><br>Menu labelling is effective in reducing energy ordered and consumed: a systematic review and meta-analysis of recent studies                              | Systematic review and meta-analysis<br><br>12 studies (6 RCTs) on changes in calorie consumed, ordered, or selected in both real-world and experimental settings, among children and adults                          | 2011 to 2014, US, Canada, Australia,                                                               | -100.3 (-146.6, -54.0) kcal in calorie consumed in both settings per meal or transaction (3 studies)<br><br>-77.8 (-121.6, -34.1) kcal in calorie purchased per meal or transaction in real-world setting (5 studies)                    | N/A                                                                                                                                                   |
| Long et. al., 2015 <sup>3</sup><br><br>Systematic Review and Meta-analysis of the Impact of Restaurant Menu Calorie Labeling                                                                           | Systematic review and meta-analysis<br><br>19 studies (11 RCTs, 8 natural experiments) on changes in calorie purchased per meal or per transaction, among children and adults                                        | 2008 to 2013, US                                                                                   | -18.1 (-33.6, -2.70) kcal in calorie purchased per meal or per transaction<br><br>When stratifying by restaurant and non-restaurant settings (RCTs), the changes were -6.7 (-20.21, 6.81) kcal and -58.2 (-102.4, -13.9) kcal in calorie | N/A                                                                                                                                                   |

|                                        |                                                                                                                                                                                                          |          |                                                                                    |                                                                                         |
|----------------------------------------|----------------------------------------------------------------------------------------------------------------------------------------------------------------------------------------------------------|----------|------------------------------------------------------------------------------------|-----------------------------------------------------------------------------------------|
|                                        |                                                                                                                                                                                                          |          | purchased per meal or per transaction                                              |                                                                                         |
| Auchincloss et. al., 2013 <sup>6</sup> | Cross-sectional study<br>648 customer surveys and transaction receipts at 7 restaurant outlets of 1 large full-service restaurant chain (2 outlets with menu calorie labels and 5 without), among adults | 2011, US | -151 kcal (-270, -33) for foods purchased from full-service restaurants (per meal) | Was included in the meta-analysis conducted by Cantu-Jungles et. al., 2017 <sup>8</sup> |

**Appendix Table 2.** Policy impact of menu calorie labeling on restaurant industry response

| Study                                                           |                               | Year  |                               |                                   |        |                               |
|-----------------------------------------------------------------|-------------------------------|-------|-------------------------------|-----------------------------------|--------|-------------------------------|
|                                                                 |                               | 2008  | 2012                          | 2013                              | 2014   | 2015                          |
| Bleich et. al., 2017 <sup>11</sup>                              | # of menu items (n)           | 6,601 | 9,526                         | 10,278                            | 10,654 | 11,034                        |
| Calorie changes in large chain restaurants from 2008 to 2015    | mean per-item calories (kcal) | 368.0 | 329.1                         | 330.1                             | 337.2  | 340.6                         |
| 44 of the 100 largest chain restaurants                         |                               |       |                               |                                   |        |                               |
|                                                                 | diff. (%)                     |       | 2012 vs. 2008<br>-38.9 (-11%) |                                   |        | 2015 vs. 2008<br>-27 (-7%)    |
| Bleich et. al., 2018 <sup>12</sup>                              | # of menu items (n)           |       | 14,705                        | 17,219 (2013-2014)                |        | 13,920                        |
| Higher-Calorie Menu Items Eliminated in Large Chain Restaurants | mean per-item calories (kcal) |       | 374.4                         | 370.9                             |        | 357.4                         |
| 66 of the 100 largest chain restaurants                         |                               |       |                               |                                   |        |                               |
|                                                                 | diff. (%)                     |       |                               | 2013-2014 vs. 2012<br>-3.52 (-1%) |        | 2015 vs. 2012<br>-17.05 (-5%) |

## Appendix 2. Baseline cancer incidence and methods of cancer incidence projections for 13 types of cancers

We estimated the cancer incidence rate projections for the defined 32 demographic subgroups as inputs for the DiCOM model. We first obtained age-adjusted incidence rates from 2006 to 2015 from the United States Cancer Statistics combining data from the Surveillance, Epidemiology, and End Results (SEER) database and the Centers for Disease Control and Prevention's National Program of Cancer Registries (NPCR) database.<sup>14</sup>

Based on the trends from 2006 to 2015, we projected age-adjusted cancer incidence rates in the next 15 years from 2016 to 2030 using the average annual percent change (AAPC) method.<sup>15, 16</sup> Because longer-term projections may not be valid, we chose to hold age-adjusted cancer incidence rates constant from 2030 to 2095. Specifically, the annual percent change was calculated for each cancer site in each of the 32 subgroups by fitting a regression line to the natural logarithm of the age-adjusted rates (I) in the years 2006 through 2015 (y). The equation for AAPC:  $\ln(I) = \alpha + \beta y$ , where  $\alpha$  and  $\beta$  were coefficients to be estimated and y is the calendar year.<sup>15, 16</sup> We then combined the AAPC projected cancer incidence rates with the projected US population to account for the change in population age distribution over time. The projected US population in each of the 32 subgroups from 2016 to 2060 were extracted from the National Interim Projections of the US population.<sup>17</sup> Because projections were only available through 2060, further projections after 2060 were not considered. We further applied the cohort-period method to estimate cancer incidence in each of the 32 subgroups in the closed cohort of US adults from 2015 to 2095 as they age. Details were illustrated in **Appendix Table 3** using colon and rectum cancer incidence among non-Hispanic white females (NHWF) as an example.

Appendix Table 3. Estimating “crude” incidence after applying cohort-period method

| EXAMPLE: Colon and Rectum Cancer, Non-Hispanic White Females |                         |                 |                          |                                     |                        |                               |                          |                                     |                        |                               |                          |                                     |                        |                               |
|--------------------------------------------------------------|-------------------------|-----------------|--------------------------|-------------------------------------|------------------------|-------------------------------|--------------------------|-------------------------------------|------------------------|-------------------------------|--------------------------|-------------------------------------|------------------------|-------------------------------|
| Age                                                          | 2015                    |                 |                          | 2016                                |                        |                               | 2017                     |                                     |                        | 2018                          |                          |                                     |                        |                               |
|                                                              | Baseline Incidence Rate | Population Size | AAPC Predicted Incidence | US Census Predicted Population Size | Cancer Cases Predicted | Age Shifted “crude” Incidence | AAPC Predicted Incidence | US Census Predicted Population Size | Cancer Cases Predicted | Age Shifted “crude” Incidence | AAPC Predicted Incidence | US Census Predicted Population Size | Cancer Cases Predicted | Age Shifted “crude” Incidence |
| 20                                                           | 8.531                   | 30523184        | 8.694                    | 1134235                             |                        | 10.64                         | 8.859                    | 126079                              |                        | 11.694                        | 9.028                    | 117775                              |                        | 13.82                         |
| 21                                                           | 8.531                   |                 | 8.694                    | 156761                              | 100565                 |                               | 8.859                    | 197549                              |                        |                               | 9.028                    | 129379                              |                        |                               |
| 22                                                           | 8.531                   |                 | 8.694                    | 177144                              | 102337                 |                               | 8.859                    | 159788                              | 102748                 |                               | 9.028                    | 140620                              |                        |                               |
| 23                                                           | 8.531                   |                 | 8.694                    | 196469                              | 14017                  |                               | 8.859                    | 180122                              | 104550                 |                               | 9.028                    | 152784                              | 104976                 |                               |
| 24                                                           | 8.531                   |                 | 8.694                    | 239910                              | 107707                 |                               | 8.859                    | 199459                              | 106263                 |                               | 9.028                    | 183136                              | 106813                 |                               |
| 25                                                           | 8.531                   |                 | 8.694                    | 283513                              | 11685                  |                               | 8.859                    | 247139                              | 110009                 |                               | 9.028                    | 202329                              | 108546                 |                               |
| 26                                                           | 8.531                   |                 | 8.694                    | 294013                              | 12497                  |                               | 8.859                    | 286229                              | 113950                 |                               | 9.028                    | 244499                              | 12353                  |                               |
| 27                                                           | 8.531                   |                 | 8.694                    | 250740                              | 108735                 |                               | 8.859                    | 296475                              | 114858                 |                               | 9.028                    | 288797                              | 16352                  |                               |
| 28                                                           | 8.531                   |                 | 8.694                    | 232421                              | 107143                 |                               | 8.859                    | 253062                              | 11012                  |                               | 9.028                    | 298770                              | 17252                  |                               |
| 29                                                           | 8.531                   |                 | 8.694                    | 216039                              | 105719                 |                               | 8.859                    | 234519                              | 109369                 |                               | 9.028                    | 255161                              | 113315                 |                               |
| 30                                                           | 8.531                   |                 | 8.694                    | 228929                              | 106839                 |                               | 8.859                    | 217844                              | 107892                 |                               | 9.028                    | 236330                              | 11615                  |                               |
| 31                                                           | 8.531                   |                 | 8.694                    | 244281                              | 108174                 |                               | 8.859                    | 230337                              | 108999                 |                               | 9.028                    | 21912                               | 10079                  |                               |
| 32                                                           | 8.531                   |                 | 8.694                    | 205955                              | 104842                 |                               | 8.859                    | 245249                              | 110320                 |                               | 9.028                    | 231390                              | 11169                  |                               |
| 33                                                           | 8.531                   |                 | 8.694                    | 226950                              | 106667                 |                               | 8.859                    | 206736                              | 106908                 |                               | 9.028                    | 246013                              | 12489                  |                               |
| 34                                                           | 8.531                   |                 | 8.694                    | 226234                              | 106605                 |                               | 8.859                    | 227540                              | 108751                 |                               | 9.028                    | 207377                              | 109001                 |                               |
| 35                                                           | 8.531                   |                 | 8.694                    | 217701                              | 105863                 |                               | 8.859                    | 226721                              | 108678                 |                               | 9.028                    | 228051                              | 10868                  |                               |
| 36                                                           | 8.531                   |                 | 8.694                    | 228467                              | 106799                 |                               | 8.859                    | 218111                              | 107918                 |                               | 9.028                    | 227199                              | 10791                  |                               |
| 37                                                           | 8.531                   |                 | 8.694                    | 180971                              | 100931                 |                               | 8.859                    | 228796                              | 108862                 |                               | 9.028                    | 218528                              | 10008                  |                               |
| 38                                                           | 8.531                   |                 | 8.694                    | 139547                              | 99069                  |                               | 8.859                    | 116267                              | 102879                 |                               | 9.028                    | 229044                              | 10958                  |                               |
| 39                                                           | 8.531                   |                 | 8.694                    | 127605                              | 98030                  |                               | 8.859                    | 139679                              | 100967                 |                               | 9.028                    | 161414                              | 104852                 |                               |
| 40                                                           | 8.531                   |                 | 8.694                    | 1088875                             | 94663                  |                               | 8.859                    | 127530                              | 99891                  |                               | 9.028                    | 139635                              | 102886                 |                               |
| 41                                                           | 8.531                   |                 | 8.694                    | 190467                              | 98279                  |                               | 8.859                    | 1088644                             | 96446                  |                               | 9.028                    | 127272                              | 10770                  |                               |
| 42                                                           | 8.531                   |                 | 8.694                    | 110345                              | 95747                  |                               | 8.859                    | 129951                              | 100105                 |                               | 9.028                    | 108229                              | 98245                  |                               |
| 43                                                           | 8.531                   |                 | 8.694                    | 130264                              | 98262                  |                               | 8.859                    | 110015                              | 97506                  |                               | 9.028                    | 129228                              | 101946                 |                               |
| 44                                                           | 8.531                   |                 | 8.694                    | 121011                              | 105229                 |                               | 8.859                    | 129268                              | 100045                 |                               | 9.028                    | 1099713                             | 99282                  |                               |
| 45                                                           | 41269                   | 14238423        | 41919                    | 139769                              | 553230                 | 43.775                        | 42.579                   | 108976                              | 54771                  | 45.825                        | 43.250                   | 128045                              | 487878                 | 47.459                        |
| 46                                                           | 41269                   |                 | 41919                    | 1346596                             | 564476                 |                               | 42.579                   | 137806                              | 56110                  |                               | 43.250                   | 207332                              | 522169                 |                               |
| 47                                                           | 41269                   |                 | 41919                    | 1292274                             | 547105                 |                               | 42.579                   | 1344191                             | 572344                 |                               | 43.250                   | 1315541                             | 568969                 |                               |
| 48                                                           | 41269                   |                 | 41919                    | 1264917                             | 530237                 |                               | 42.579                   | 1289694                             | 549140                 |                               | 43.250                   | 1341533                             | 580211                 |                               |
| 49                                                           | 41269                   |                 | 41919                    | 1295410                             | 543019                 |                               | 42.579                   | 1262140                             | 537408                 |                               | 43.250                   | 1286923                             | 556592                 |                               |
| 50                                                           | 41269                   |                 | 41919                    | 1325816                             | 555765                 |                               | 42.579                   | 1292230                             | 550220                 |                               | 43.250                   | 1259139                             | 544576                 |                               |
| 51                                                           | 41269                   |                 | 41919                    | 1432079                             | 600309                 |                               | 42.579                   | 1322198                             | 562980                 |                               | 43.250                   | 1288813                             | 557410                 |                               |
| 52                                                           | 41269                   |                 | 41919                    | 1489756                             | 624487                 |                               | 42.579                   | 1427705                             | 607904                 |                               | 43.250                   | 1318321                             | 570172                 |                               |
| 53                                                           | 41269                   |                 | 41919                    | 1510286                             | 633093                 |                               | 42.579                   | 1484805                             | 632216                 |                               | 43.250                   | 1423107                             | 615492                 |                               |
| 54                                                           | 41269                   |                 | 41919                    | 1532940                             | 642589                 |                               | 42.579                   | 1504858                             | 640755                 |                               | 43.250                   | 1499608                             | 639928                 |                               |
| 55                                                           | 59.736                  | 1511568         | 58.496                   | 1575080                             | 921363                 | 65.864                        | 57.283                   | 1526976                             | 874691                 | 71.135                        | 56.094                   | 146151                              | 840934                 | 75.804                        |
| 56                                                           | 59.736                  |                 | 58.496                   | 1579128                             | 923731                 |                               | 57.283                   | 1568482                             | 898466                 |                               | 56.094                   | 1520747                             | 853048                 |                               |
| 57                                                           | 59.736                  |                 | 58.496                   | 1554236                             | 909170                 |                               | 57.283                   | 1572018                             | 900492                 |                               | 56.094                   | 1561581                             | 875954                 |                               |
| 58                                                           | 59.736                  |                 | 58.496                   | 1566074                             | 916095                 |                               | 57.283                   | 1546788                             | 886040                 |                               | 56.094                   | 1564631                             | 877664                 |                               |
| 59                                                           | 59.736                  |                 | 58.496                   | 1559941                             | 912507                 |                               | 57.283                   | 1558015                             | 892471                 |                               | 56.094                   | 1539019                             | 863298                 |                               |
| 60                                                           | 59.736                  |                 | 58.496                   | 1509257                             | 882859                 |                               | 57.283                   | 1551289                             | 888618                 |                               | 56.094                   | 1549572                             | 869217                 |                               |
| 61                                                           | 59.736                  |                 | 58.496                   | 1507776                             | 881993                 |                               | 57.283                   | 1500225                             | 859367                 |                               | 56.094                   | 1542155                             | 865062                 |                               |
| 62                                                           | 59.736                  |                 | 58.496                   | 1469467                             | 859583                 |                               | 57.283                   | 1497943                             | 858060                 |                               | 56.094                   | 1490621                             | 836199                 |                               |
| 63                                                           | 59.736                  |                 | 58.496                   | 1428612                             | 835685                 |                               | 57.283                   | 1458963                             | 835731                 |                               | 56.094                   | 1487453                             | 834372                 |                               |
| 64                                                           | 59.736                  |                 | 58.496                   | 1384020                             | 809600                 |                               | 57.283                   | 1417465                             | 819601                 |                               | 56.094                   | 1447782                             | 812119                 |                               |
| 65                                                           | 147.246                 | 20639658        | 140.189                  | 1344027                             | 1884181                | 140.189                       | 133.471                  | 1372210                             | 1831501                | 133.471                       | 127.075                  | 1405568                             | 1786119                | 127.075                       |
| 66                                                           | 147.246                 |                 | 140.189                  | 1307657                             | 1833194                |                               | 133.471                  | 1331467                             | 1777121                |                               | 127.075                  | 1395984                             | 1727685                |                               |
| 67                                                           | 147.246                 |                 | 140.189                  | 1291598                             | 1810681                |                               | 133.471                  | 1294222                             | 1727410                |                               | 127.075                  | 1318007                             | 1674851                |                               |
| 68                                                           | 147.246                 |                 | 140.189                  | 1292613                             | 1812104                |                               | 133.471                  | 1277026                             | 1704458                |                               | 127.075                  | 1279194                             | 1626292                |                               |
| 69                                                           | 147.246                 |                 | 140.189                  | 1382868                             | 1938632                |                               | 133.471                  | 1276471                             | 1703717                |                               | 127.075                  | 1261379                             | 1602891                |                               |
| 70                                                           | 147.246                 |                 | 140.189                  | 1387587                             | 1944990                |                               | 133.471                  | 1363827                             | 1820312                |                               | 127.075                  | 1259177                             | 1600093                |                               |
| 71                                                           | 147.246                 |                 | 140.189                  | 1382267                             | 1877032                |                               | 133.471                  | 1372764                             | 1898357                |                               | 127.075                  | 1343441                             | 1707171                |                               |
| 72                                                           | 147.246                 |                 | 140.189                  | 1372611                             | 1863496                |                               | 133.471                  | 1366021                             | 1893357                |                               | 127.075                  | 1356905                             | 1715982                |                               |
| 73                                                           | 147.246                 |                 | 140.189                  | 1329822                             | 1820091                |                               | 133.471                  | 1354967                             | 1874603                |                               | 127.075                  | 1348632                             | 1705469                |                               |
| 74                                                           | 147.246                 |                 | 140.189                  | 1274564                             | 1726044                |                               | 133.471                  | 1329254                             | 1824824                |                               | 127.075                  | 1338077                             | 169515                 |                               |
| 75                                                           | 147.246                 |                 | 140.189                  | 1296574                             | 1716711                |                               | 133.471                  | 1355200                             | 1844443                |                               | 127.075                  | 1327097                             | 1733635                |                               |
| 76                                                           | 147.246                 |                 | 140.189                  | 1274848                             | 1648402                |                               | 133.471                  | 1377087                             | 1837185                |                               | 127.075                  | 1334495                             | 17060430               |                               |
| 77                                                           | 147.246                 |                 | 140.189                  | 1206707                             | 160727                 |                               | 133.471                  | 1272604                             | 1711140                |                               | 127.075                  | 1256255                             | 161007                 |                               |
| 78                                                           | 147.246                 |                 | 140.189                  | 1294044                             | 162451                 |                               | 133.471                  | 1285495                             | 1719936                |                               | 127.075                  | 1250976                             | 161115                 |                               |
| 79                                                           | 147.246                 |                 | 140.189                  | 1265026                             | 162619                 |                               | 133.471                  | 1285756                             | 176578                 |                               | 127.075                  | 1262851                             | 162315                 |                               |
| 80                                                           | 147.246                 |                 | 140.189                  | 1295777                             | 163515                 |                               | 133.471                  | 1260790                             | 1803215                |                               | 127.075                  | 1263555                             | 1603816                |                               |
| 81                                                           | 147.246                 |                 | 140.189                  | 1272977                             | 1603252                |                               | 133.471                  | 1257026                             | 1762154                |                               | 127.075                  | 1277004                             | 1733225                |                               |
| 82                                                           | 147.246                 |                 | 140.189                  | 1252332                             | 158234                 |                               | 133.471                  | 1246330                             | 1729192                |                               | 127.075                  | 1244674                             | 1692142                |                               |
| 83                                                           | 147.246                 |                 | 140.189                  | 1296976                             | 166707                 |                               | 133.471                  | 1285519                             | 1848027                |                               | 127.075                  | 1279986                             | 1682228                |                               |
| 84                                                           | 147.246                 |                 | 140.189                  | 1275655                             | 1666817                |                               | 133.471                  | 1267692                             | 1824233                |                               | 127.075                  | 1257134                             | 1680901                |                               |
| 85                                                           | 147.246                 |                 | 140.189                  | 1252173                             | 1633898                |                               | 133.471                  | 1244106                             | 1759252                |                               | 127.075                  | 1243698                             | 1655186                |                               |
| 86                                                           | 147.246                 |                 | 140.189                  | 1228834                             | 160179                 |                               | 133.471                  | 1248526                             | 1758610                |                               | 127.075                  | 1241116                             | 1622678                |                               |
| 87                                                           | 147.246                 |                 | 140.189                  | 1283933                             | 158233                 |                               | 133.471                  | 1293130                             | 1824714                |                               | 127.075                  | 1283961                             | 167917                 |                               |
| 88                                                           | 147.246                 |                 | 140.189                  | 1266801                             | 150096                 |                               | 133.471                  | 1288261                             | 184827                 |                               | 127.075                  | 126875                              | 1653497                |                               |
| 89                                                           | 147.246                 |                 | 140.189                  | 1206444                             | 149508                 |                               | 133.471                  | 128962                              | 1826923                |                               | 127.075                  | 124275                              | 1639706                |                               |
| 90                                                           | 147.246                 |                 | 140.189                  | 1278562                             | 139054                 |                               | 133.471                  | 1283710                             | 178670                 |                               | 127.075                  | 1283306                             | 160010                 |                               |
| 91                                                           | 147.246                 |                 | 140.189                  | 1246568                             | 1345662                |                               | 133.471                  | 1242960                             | 1724281                |                               | 127.075                  | 1247721                             | 1614790                |                               |
| 92                                                           | 147.246                 |                 | 140.189                  | 1209022                             | 1293026                |                               | 133.471                  | 121695                              | 182551                 |                               | 127.075                  | 1208339                             | 165381                 |                               |
| 93                                                           | 147.246                 |                 | 140.189                  | 129864                              | 128131                 |                               | 133.471                  | 126399                              | 183541                 |                               | 127.075                  | 128878                              | 167308                 |                               |
| 94                                                           | 147.246                 |                 | 140.189                  | 128657                              | 124382                 |                               | 133.471                  | 120691                              | 187782                 |                               | 127.075                  | 124633                              | 165927                 |                               |
| 95                                                           | 147.246                 |                 | 140.189                  | 109277                              | 123195                 |                               | 133.471                  | 12531                               | 180196                 |                               | 127.075                  | 124362                              | 165325                 |                               |
| 96                                                           | 147.246                 |                 | 140.189                  | 80177                               | 121399                 |                               | 133.471                  | 186769                              | 16811                  |                               | 127.075                  | 124949                              | 16730                  |                               |
| 97                                                           | 147.246                 |                 | 140.189                  | 56739                               | 119542                 |                               | 133.471                  | 62172                               | 182982                 |                               | 127.075                  | 12474                               | 185666                 |                               |
| 98                                                           | 147.246                 |                 | 140.189                  | 42046                               | 118944                 |                               | 133.471                  | 42907                               | 17268                  |                               | 127.075                  | 124705                              | 159858                 |                               |
| 99                                                           | 147.246                 |                 | 140.189                  | 27405                               | 11819                  |                               | 133.471                  | 30959                               | 14321                  |                               | 127.075                  | 123659                              | 140231                 |                               |
| 100                                                          | 147.246                 |                 | 140.189                  | 49314                               | 116933                 |                               | 133.471                  | 50716                               | 167691                 |                               | 127.075                  | 122719                              | 166992                 |                               |

### Appendix 3. Cancer survival for 13 types of cancers

We estimated the 5-year relative survival for the defined 32 demographic subgroups. We obtained five-year relative survival rates using the period analysis method from the United States Cancer Statistics which incorporates data from the Surveillance, Epidemiology, and End Results (SEER) database.<sup>14</sup> The five-year survival for 2014, which was the most recently available data at the time of analysis, was used. These rates were extracted for each cancer type and by the defined 32 demographic subgroups for each cancer type. The rates are on a scale of 0-1.

Relative survival is a net survival measure representing cancer survival in the absence of other causes of death. Relative survival is defined as the ratio of the proportion of observed survivors in a cohort of cancer patients to the proportion of expected survivors in a comparable set of cancer-free individuals.<sup>18</sup> Relative survival is the preferred method to estimate survival from cancer registry data.

The period analysis is a method that enhances up-to-date monitoring of survival.<sup>19, 20</sup> In contrast to traditional cohort analysis of survival, period analysis derives long-term survival estimates exclusively from the survival experience of patients within some recent calendar period.<sup>19, 20</sup> Three-year intervals were chosen which results in the years 2008-2014 is used to calculate 5-year survival. Using seven years of data to calculate 5-year survival is the standard method used by SEER and used in SEER publications.<sup>21</sup>

The first interval contributed to the one-year survival and used cases diagnosed in 2012-2014, the second interval contributed to the two-year survival and used cases diagnosed in 2011-2013, the third interval contributed to the three-year survival and used cases diagnosed in 2010-2012, the fourth interval contributed to the four-year survival and used cases diagnosed in 2009-2011 and the fifth interval contributed to the five-year survival and used cases diagnosed in 2008-2010.

1  
2  
3 This analysis, therefore, used 2008-2014 diagnoses to calculate for 5-year relative survival for  
4  
5 2014. The highlighted orange boxes represent survival contributions for each year of diagnosis and year  
6  
7 of follow-up (**Appendix Table 4**). The annual probability of death was calculated as  $1 - \exp[\ln(5\text{-year}$   
8  
9 relative survival)/5].  
10  
11  
12  
13  
14  
15  
16  
17  
18  
19  
20  
21  
22  
23  
24  
25  
26  
27  
28  
29  
30  
31  
32  
33  
34  
35  
36  
37  
38  
39  
40  
41  
42  
43  
44  
45  
46  
47  
48  
49  
50  
51  
52  
53  
54  
55  
56  
57  
58  
59  
60

For peer review only

**Appendix Table 4.** Period method for 5-year relative survival for 2014

| YEARS OF DIAGNOSIS |      |      |      |      |      |      |      |      |      |      |      |      |      |      |      |
|--------------------|------|------|------|------|------|------|------|------|------|------|------|------|------|------|------|
|                    | 2000 | 2001 | 2002 | 2003 | 2004 | 2005 | 2006 | 2007 | 2008 | 2009 | 2010 | 2011 | 2012 | 2013 | 2014 |
| 1                  |      |      |      |      |      |      |      |      |      |      |      |      |      |      |      |
| 2                  |      |      |      |      |      |      |      |      |      |      |      |      |      |      |      |
| 3                  |      |      |      |      |      |      |      |      |      |      |      |      |      |      |      |
| 4                  |      |      |      |      |      |      |      |      |      |      |      |      |      |      |      |
| 5                  |      |      |      |      |      |      |      |      |      |      |      |      |      |      |      |

For peer review only



#### Appendix 4. Methods of estimating the health-related quality of life among 13 types of cancers

Health utility values range from 0 (dead) to 1 (perfect health) and were assigned for each cancer type and by phase of care (initial, continuous, end of life), if available. We first searched databases for systematic reviews pertaining to utility weights or HRQOL measures for each cancer type of interest separately. We started with PubMed and searched Google Scholar if needed. The following search string was used for each cancer type : ("health related quality of life" OR "HRQOL" OR "quality of life" OR "QOL" OR "preference weight\*" OR "utility weight\*" OR "health state utilit\*" OR "health utility\*") AND ("cancer of interest") AND ("cancer" OR "neoplasm\*") AND ("review" OR "systematic review").

When an appropriate systematic review was identified, we read the articles included in the review and determined if the paper met the following data needs. Data Extraction Hierarchy: 1) cancer type specific to the type of interest; 2) consistent in the instrument used, prefer EQ-5D whenever available; 3) US samples preferred; 4) phase of care (assume same utility weights by phase if the phase of care data were not available). If no systematic reviews were available, we searched for individual studies about the utility weights of the cancer of interest. Additionally, check how often the paper is cited to see if it is a frequently used utility weight.

## Appendix 5. Methods of estimating policy implementation costs

We estimated the costs of implementing the federal menu calorie labeling for both government and industry, including government administration costs, monitoring and evaluation costs, industry compliance costs and reformulation costs, based on the FDA's budget report,<sup>22</sup> the Nutrition Review Project report,<sup>23</sup> and FDA's RIA<sup>24</sup> (**Appendix Table 5**).

It was estimated by FDA that approximately 298,600 establishments, organized under 2,130 chains were covered by the menu calorie labeling policy. Among the covered establishments, 115,000 (38.5%) were full-service restaurants and drinking places organized under 530 (24.9%) chains, and 116,200 (38.9%) were limited-service restaurants organized under 540 (25.4%) chains. In total, about 231,200 (77.4%) restaurants organized under 1,070 (50.2%) chains were covered by this policy.<sup>24</sup>

For industry compliance (#3) and reformulation costs (#4), the FDA estimated the costs by the type of establishments. Therefore, we only included the relevant costs incurred by restaurants as this approach generated more conservative estimates. In addition, the industry compliance costs consist of initial costs and recurring costs associated with new chains. In FDA's RIA, the initial costs were presented as a one-time cost, while the recurring costs associated with new chains were presented as annual costs and assumed to be incurred for 20 years starting from the 2nd year of policy implementation. According to FDA, 20 years is more appropriate for interventions that play out over long periods and whose effects deal with chronic conditions. Similarly, the reformulation costs (#4) estimated by FDA were presented as annual costs in FDA's RIA using the same assumption. We followed the same assumption and presented the annual compliance costs (#3) and annual reformulation costs (#4) incurred by restaurants in **Appendix Table 5**.

1  
2  
3 The cost of implementing the menu calorie labeling is fixed by the government. Uncertainty for  
4 the costs associated with government administration (#1) and government monitoring and evaluation (#  
5 2) was not provided in the source materials.<sup>22, 23</sup> We assumed that uncertainty is 20% around these costs.  
6  
7

8  
9  
10 For annual costs, namely the government monitoring and evaluation costs (#2) and the recurring  
11 costs in industry compliance (part of #3), and the reformulation costs (#4), we applied a 3% discounting  
12 rate recommended by the Second Panel on cost-effectiveness in health and medicine<sup>4</sup> to reflect the  
13 present value of future costs of government monitoring and evaluation, industry compliance and  
14 industry reformulation. The model is a closed cohort model, so we computed the discounted present  
15 value of per-person costs and total national costs for persons alive at implementation who remained  
16 alive in each subsequent year (not for the larger total US population in each year, which also has growth  
17 from immigration and new persons reaching the threshold age). The year-specific discounting factor is  
18 estimated by  $1/(1+3\%)^{(t-1)}$  (t is the number of years of policy intervention, t=1, 2, 3, ..., lifetime). As  
19 our model estimated the costs and health outcomes based on a closed cohort and the population size  
20 decline over time, we need to express the annual costs in proportion to the population at risk. The  
21 population at risk was estimated based on the proportion of death ( $P_{dt}$ , t=1, 2, 3, ...) in each year. We  
22 first obtained the proportion of people who are alive each year by calculating  $1-P_{dt}$  (t=1, 2, 3, ...). Then  
23 we multiplied the baseline population size of 235 million by the proportion of people who are alive each  
24 year (**Appendix Table 6**).  
25  
26  
27  
28  
29  
30  
31  
32  
33  
34  
35  
36  
37  
38  
39  
40  
41  
42  
43

44 We then estimated the per-person annual cost for cost categories #2, #3 (annual part), and #4, by  
45 dividing the annual cost estimated in the second year of implementing the policy among all US  
46 populations by the population size in the second year. Specifically, for government monitoring and  
47 evaluation, the per person annual cost is estimated  $\$503,648/233,719,989=\$0.00215$ , the per person  
48 annual cost for industry compliance recurring component is  $\$/233,719,989=\$$ , and that for reformulation  
49  
50  
51  
52  
53  
54  
55  
56  
57  
58  
59  
60

1  
2  
3 is \$662,800,000 /233,719,989=\$2.83587. Taken together, to estimate the discounted annual cost of #2,  
4  
5 #3 (annual part), and #4, we multiplied the population at risk, the per person annual cost estimated at  
6  
7 year-2, and the year-specific discounting factor, using: discounted annual cost = population at risk x per-  
8  
9 person annual cost x  $1/(1+3\%)^{(t-1)}$ .  
10  
11  
12  
13  
14  
15  
16  
17  
18  
19  
20  
21  
22  
23  
24  
25  
26  
27  
28  
29  
30  
31  
32  
33  
34  
35  
36  
37  
38  
39  
40  
41  
42  
43  
44  
45  
46  
47  
48  
49  
50  
51  
52  
53  
54  
55  
56  
57  
58  
59  
60

For peer review only

**Appendix Table 5.** Implementation cost estimates for the federal menu calorie labeling policy (in 2015 US dollars)

| Policy Effect                  | Cost Category                                        | One-time Cost*                                    | Annual Cost*                                                                                                   | Source                                        | Major Elements                                                                                                                                                                                                                                                                                                                                                                                                                                                                                                                                                                         |
|--------------------------------|------------------------------------------------------|---------------------------------------------------|----------------------------------------------------------------------------------------------------------------|-----------------------------------------------|----------------------------------------------------------------------------------------------------------------------------------------------------------------------------------------------------------------------------------------------------------------------------------------------------------------------------------------------------------------------------------------------------------------------------------------------------------------------------------------------------------------------------------------------------------------------------------------|
| Consumer behavior              | 1. Government administration <sup>#</sup>            | \$9,073,620<br>(\$7,258,896 to \$10,888,344)      | N/A                                                                                                            | FDA FY 2012 Budget Report <sup>22</sup>       | 1) Costs for outreach, education, review of regulatory issues, developing training for inspectors, etc.                                                                                                                                                                                                                                                                                                                                                                                                                                                                                |
|                                | 2. Government monitoring and evaluation <sup>#</sup> | N/A                                               | \$503,648<br>(\$402,918 to \$604,378)<br>(starting from 2 <sup>nd</sup> year and last for a lifetime)          | Nutrition Review Project report <sup>23</sup> | 1) Monitor industry compliance<br>2) Evaluate the accuracy, usefulness, and health impact of the policy intervention                                                                                                                                                                                                                                                                                                                                                                                                                                                                   |
|                                | 3. Industry compliance                               | \$276,632,470<br>(\$225,552,530 to \$327,205,740) | \$27,648,591<br>(\$16,756,003 to \$38,649,212)<br>(starting from 2 <sup>nd</sup> year and last for a lifetime) | FDA's RIA <sup>24</sup> Table 4-8             | 1) Collecting and managing records of nutritional analysis for each standard menu item (initial cost + recurring cost associated with new chains)<br>2) Revising or replacing existing menus, menu boards, and providing full written nutrition information (initial cost + recurring cost associated with new chains)<br>3) Training employees to understand the nutrition information to help ensure compliance with the final requirements (initial cost + recurring cost associated with new chains)<br>4) Legal review (initial cost + recurring cost associated with new chains) |
| Industry response <sup>^</sup> | 4. Industry reformulation                            | N/A                                               | \$15,059,100<br>(\$5,791,900 to \$24,124,700)<br>(starting from 2 <sup>nd</sup> year and last for a lifetime)  | FDA's RIA <sup>24</sup> Table 4-8             | 1) Annually recurring costs of nutrition analysis refer to the nutrition cost that will be incurred by the covered establishments due to the introduction of a new standard or reformulated standard menu items in their menus and the cost that will be incurred by new chains entering the industry<br>2) Annually recurring changes to menus or menu boards will be tied to new or reformulated standard menu items. In general, these future changes to menus will be incorporated into the natural menu                                                                           |

|  |  |  |  |  |                                                                                                                                                                                                                                                                                                                                                                          |
|--|--|--|--|--|--------------------------------------------------------------------------------------------------------------------------------------------------------------------------------------------------------------------------------------------------------------------------------------------------------------------------------------------------------------------------|
|  |  |  |  |  | <p>replacement cycle, so there will be no additional recurring menu update costs. However, all chain retail food establishments will need to provide additional written nutrition information for the reformulated or newly introduced menu items</p> <p>Average formula count, 6 new menu items, and 6 reformulated items per year<br/>FDA reformulation cost model</p> |
|--|--|--|--|--|--------------------------------------------------------------------------------------------------------------------------------------------------------------------------------------------------------------------------------------------------------------------------------------------------------------------------------------------------------------------------|

\*Policy intervention costs were inflated to 2015 US (December) dollars using the Consumer Price Index.

# Given no range of uncertainty was provided in source materials, we assumed 20% uncertainty around these costs.

^Some chains or establishments may respond to increased consumer interest in caloric content standard menu items by reformulating existing menu items or by introducing new, lower-calorie items. The change in manufacturing costs associated with reformulating these items has not been included in the cost estimation, the FDA includes the cost associated with analyzing the nutrition information of new or reformulated items.

Peer review only

1  
2  
3  
4  
5  
6  
7  
8  
9  
10  
11  
12  
13  
14  
15  
16  
17  
18  
19  
20  
21  
22  
23  
24  
25  
26  
27  
28  
29  
30  
31  
32  
33  
34  
35  
36  
37  
38  
39  
40  
41  
42  
43  
44  
45  
46  
47

**Appendix Table 6.** The population size of people who are alive each year over a lifetime (in millions)

| Year | Population Size (Million) |
|------|---------------------------|
| 1    | 235.2                     |
| 2    | 233.7                     |
| 3    | 232.1                     |
| 4    | 230.4                     |
| 5    | 228.2                     |
| ⋮    | ⋮                         |
| 67   | 5.832                     |
| 68   | 4.348                     |
| 69   | 3.157                     |
| 70   | 2.233                     |

## Appendix 6. Annual health-related costs among cancer patients and the general population without cancer

The annual health-related costs data include: 1) medical expenditure, 2) productivity loss from missed workdays or disability, and 3) patient time cost associated with receiving care for cancer survivors by age (under 65 vs. above 65 years old) and phase of care (initial, continuing, end-year of life); 4) medical expenditure, 5) productivity loss, and 6) patient time cost for individuals without cancer by age and status of end year of life. The description of the data source and data structure were provided in **Appendix Table 7**.

We extracted the raw data for each of the costing components from the published literature.<sup>15, 25-29</sup> The overall assumptions for data extraction include: 1) health-related costs for breast cancer among postmenopausal females, advanced prostate cancer, esophageal adenocarcinoma, and stomach cardia cancer, by age, sex, and phase of cancer care, were the same as those for breast cancer, prostate cancer, esophagus cancer, and stomach cancer; 2) if no data available for a specific cancer type, we assumed the costs for that cancer type were the same as the estimates of costs for all-cancer sites, e.g., medical expenditure for all-cancer sites were used to replace the medical expenditures for multiple myeloma, gallbladder, liver, and thyroid cancers; 3) we extracted the costs for end-year of life due to cancer death and assumed that death due to other causes is not a competing outcome; 4) we assumed that the end-year life medical expenditure for individuals without cancer does not vary by the 32 subgroups.

If a specific costing component was not reported directly in the raw data, we calculated the cost for that component based on available data. For example, the annual productivity loss for colorectal cancer was reported as a percentage of total health-related costs.<sup>29</sup> We multiplied the percentage and the total health-related costs to obtain the productivity loss for colorectal cancer. We also performed data imputation for unavailable data. For instance, the annual productivity loss for all-cancer sites was



1  
2  
3 reported by time interval since cancer diagnosis (diagnosed within one year vs. diagnosed greater than  
4 one year).<sup>25</sup> To obtain this costing component by the defined phases of care, we calculated the weighted  
5 means which was used as the annual productivity loss for the continuous phase. We then assumed that  
6 the productivity loss in the initial phase and end-of-life phase of cancer care are 1.3 times and 4 times  
7 the mean estimates based on available data for other cancers.<sup>15, 25</sup> For individuals without cancer, we  
8 assumed that the end-of-life productivity loss is 4 times to the mean estimate of the productivity loss.  
9  
10 The same rules applied to data imputation for patient time costs.

11  
12 We then applied the age shifting to keep the expenditures consistent within each age group.  
13  
14 Starting from 2021, individuals in the cohort of 55-64 years old have turned into the cohort of 65 years  
15 and older. Therefore, we assumed that starting from 2021, the health-related expenditures for individuals  
16 who were in the cohort of 55-64 years old would be the same as those for individuals who were in the  
17 cohort of 65 years and older at the beginning of the DiCOM model. Based on the same assumption,  
18 starting from 2031 and 2047, the health-related expenditures for the cohort of 45-54 years old and those  
19 for the cohort of 20-44 years old were projected to be the same as those for the cohort of 65 years and  
20 older, respectively. We followed the same rule and applied the age shifting for the health-related  
21 expenditures for individuals without cancer. All estimations and projections were performed in SAS 9.4.  
22 All health-related expenditures were inflated to 2015 US dollars using the Personal Health Care (PHC)  
23 index.

**Appendix Table 7.** Description of the data source of health-related expenditures

|                            | <b>A. Cancer Survivors</b>                                                                                                        |                                                                                                             | <b>B. Individuals without Cancer</b>                                                 |                                                                                                         |
|----------------------------|-----------------------------------------------------------------------------------------------------------------------------------|-------------------------------------------------------------------------------------------------------------|--------------------------------------------------------------------------------------|---------------------------------------------------------------------------------------------------------|
|                            | Data source<br>(Excess or Total)                                                                                                  | Category                                                                                                    | Data source                                                                          | Category                                                                                                |
| <b>Medical expenditure</b> | Mariotto et al. 2011, SEER-Medicare, in 2010 US dollars (Excess)                                                                  | -by phase of care <sup>1</sup><br>-by age (under 65 vs. above 65 years old)<br>-by sex                      | Kim et al. 2018, MEPS 2013-2014, <i>in vivo</i> analysis, in 2014 US dollars (Total) | -Medical expenditure among all US adults<br>-by 32 subgroups stratified by age, sex, and race/ethnicity |
|                            |                                                                                                                                   |                                                                                                             | Hogen et al. 2001, SEER-Medicare (65+), in 2001 US dollars (Total)                   | -Medical expenditure in the end year of life among all US adults                                        |
| <b>Productivity loss</b>   | Zheng et al. 2016, MEPS 2008-2012, data available for colorectal, female breast, and prostate cancers, in 2012 US dollars (Total) | -by age                                                                                                     |                                                                                      |                                                                                                         |
|                            | Guy et al. 2013, MEPS 2008-2010, all types of cancer, in 2010 US dollars (Total)                                                  | -by age<br>-by time interval since cancer diagnosis (less than 1 year vs. greater than 1 year) <sup>2</sup> | Guy et al. 2013, MEPS 2008-2010, in 2010 US dollars (Total)                          | -by age                                                                                                 |
| <b>Patient time cost</b>   | Yabroff et al. 2014, MEPS 2008-2011, all types of cancer, in 2011 US dollars (Total)                                              | -by age                                                                                                     | Yabroff et al. 2014, MEPS 2008-2011, in 2011 US dollars (Total)                      | -by age                                                                                                 |

1. The definition of phases of care: 1) initial phase, defined as the first 12 months following diagnosis, 2) end-year of life phase, defined as the final 12 months of life, and 3) the continuing phase, defined as all the months between the initial phase and the end-year of life. The costs of end-year of life varied by cause of death, either cancer-specific death or death due to other causes.

2. Weighted means were calculated based on sample sizes and strata means.

## Reference

1. Shangguan S, Afshin A, Shulkin M, et al. A Meta-Analysis of Food Labeling Effects on Consumer Diet Behaviors and Industry Practices. *American journal of preventive medicine*. Feb 2019;56(2):300-314. doi:10.1016/j.amepre.2018.09.024
2. Food and Drug Administration. Food Labeling; Nutrition Labeling of Standard Menu Items in Restaurants and Similar Retail Food Establishments; Calorie Labeling of Articles of Food in Vending Machines; Final Rule In: Department of Health and Human Services, editor. 2014.
3. Long MW, Tobias DK, Craddock AL, Batchelder H, Gortmaker SL. Systematic review and meta-analysis of the impact of restaurant menu calorie labeling. *Am J Public Health*. 2015;105(5):e11-e24. doi:10.2105/AJPH.2015.302570
4. Petimar J, Zhang F, Cleveland LP, et al. Estimating the effect of calorie menu labeling on calories purchased in a large restaurant franchise in the southern United States: quasi-experimental study. *BMJ (Clinical research ed)*. 2019;367:l5837-l5837. doi:10.1136/bmj.l5837
5. Kaur A, researcher, Briggs ADM, academic v. Calorie labelling to reduce obesity. *BMJ (Clinical research ed)*. 2019;367:l6119-l6119. doi:10.1136/bmj.l6119
6. Auchincloss AH, Mallya GG, Leonberg BL, Ricchezza A, Glanz K, Schwarz DF. Customer responses to mandatory menu labeling at full-service restaurants. *American journal of preventive medicine*. 2013;45(6):710-719. doi:10.1016/j.amepre.2013.07.014
7. Littlewood JA, Lourenço S, Iversen CL, Hansen GL. Menu labelling is effective in reducing energy ordered and consumed: a systematic review and meta-analysis of recent studies. *Public Health Nutr*. 2016;19(12):2106-2121. doi:10.1017/S1368980015003468
8. Cantu-Jungles TM, McCormack LA, Slaven JE, Slobodnik M, Eicher-Miller HA. A Meta-Analysis to Determine the Impact of Restaurant Menu Labeling on Calories and Nutrients (Ordered or Consumed) in U.S. Adults. *Nutrients*. 2017;9(10):1088. doi:10.3390/nu9101088
9. Bleich SN, Wolfson JA, Jarlenski MP. Calorie changes in chain restaurant menu items: implications for obesity and evaluations of menu labeling. *American journal of preventive medicine*. Jan 2015;48(1):70-5. doi:10.1016/j.amepre.2014.08.026
10. Bleich SN, Wolfson JA, Jarlenski MP. Calorie Changes in Large Chain Restaurants: Declines in New Menu Items but Room for Improvement. *American journal of preventive medicine*. 2016;50(1):e1-e8. doi:10.1016/j.amepre.2015.05.007
11. Bleich SN, Wolfson JA, Jarlenski MP. Calorie changes in large chain restaurants from 2008 to 2015. *Preventive medicine*. Jul 2017;100:112-116. doi:10.1016/j.ypmed.2017.04.004
12. Bleich SN, Moran AJ, Jarlenski MP, Wolfson JA. Higher-Calorie Menu Items Eliminated in Large Chain Restaurants. *American journal of preventive medicine*. Feb 2018;54(2):214-220. doi:10.1016/j.amepre.2017.11.004
13. Bleich SN, Wolfson JA, Jarlenski MP, Block JP. Restaurants With Calories Displayed On Menus Had Lower Calorie Counts Compared To Restaurants Without Such Labels. *Health affairs (Project Hope)*. 2015;34(11):1877-1884. doi:10.1377/hlthaff.2015.0512
14. Centers for Disease Control and Prevention. NPCR and SEER Incidence – U.S. Cancer Statistics Public Use Databases. United States Department of Health and Human Services, Centers for Disease Control and Prevention and National Cancer Institute. Accessed September 4, 2019. [www.cdc.gov/cancer/uscs/public-use](http://www.cdc.gov/cancer/uscs/public-use)
15. Mariotto AB, Yabroff KR, Shao Y, Feuer EJ, Brown ML. Projections of the cost of cancer care in the United States: 2010-2020. *Journal of the National Cancer Institute*. Jan 19 2011;103(2):117-28. doi:10.1093/jnci/djq495
16. Clegg LX, Hankey BF, Tiwari R, Feuer EJ, Edwards BK. Estimating average annual per cent change in trend analysis. *Statistics in medicine*. Dec 20 2009;28(29):3670-82. doi:10.1002/sim.3733
17. United States Census Bureau. 2014 National Population Projections Tables. Accessed July 3, 2019. <https://www.census.gov/data/tables/2014/demo/popproj/2014-summary-tables.html>

- 1  
2  
3 18. National Cancer Institute. Surveillance research Program. Measures of Cancer Survival.  
4 <https://surveillance.cancer.gov/survival/measures.html>
- 5 19. Brenner H, Hakulinen T. Up-to-date and precise estimates of cancer patient survival: model-based  
6 period analysis. *American journal of epidemiology*. Oct 1 2006;164(7):689-96. doi:10.1093/aje/kwj243
- 7 20. Brenner H, Hakulinen T. Up-to-date cancer survival: period analysis and beyond. *International journal of*  
8 *cancer*. Mar 15 2009;124(6):1384-90. doi:10.1002/ijc.24021
- 9 21. National Cancer Institute. Surveillance Research Program. Cancer Survival Statistics: Cohort Definition  
10 Using Diagnosis Year. <https://surveillance.cancer.gov/survival/cohort.html>
- 11 22. Food and Drug Administration. *Justification of Estimates for Appropriations Committees Fiscal Year*  
12 *2012*. 2012.  
13 <https://www.fda.gov/downloads/AboutFDA/ReportsManualsForms/Reports/BudgetReports/UCM243370.pdf>
- 14 23. Food and Drug Administration. *The Nutrition Review Project. Report to the Director, Center for Food*  
15 *Safety and Applied Nutrition*. 2014. [http://www.fdalawblog.net/wp-](http://www.fdalawblog.net/wp-content/uploads/archives/docs/Nutrition%20Review%20Project.pdf)  
16 [content/uploads/archives/docs/Nutrition%20Review%20Project.pdf](http://www.fdalawblog.net/wp-content/uploads/archives/docs/Nutrition%20Review%20Project.pdf)
- 17 24. S. FaDAaHH. Food labeling; nutrition labeling of standard menu items in restaurants and similar retail  
18 food establishments. Final rule. *Fed Regist*. 2014;79(230):71155-71259.
- 19 25. Guy GP, Jr., Ekwueme DU, Yabroff KR, et al. Economic burden of cancer survivorship among adults in the  
20 United States. *Journal of clinical oncology : official journal of the American Society of Clinical Oncology*. Oct 20  
21 2013;31(30):3749-57. doi:10.1200/jco.2013.49.1241
- 22 26. Hogan C, Lunney J, Gabel J, Lynn J. Medicare beneficiaries' costs of care in the last year of life. *Health*  
23 *affairs (Project Hope)*. Jul-Aug 2001;20(4):188-95. doi:10.1377/hlthaff.20.4.188
- 24 27. Yabroff KR, Davis WW, Lamont EB, et al. Patient time costs associated with cancer care. *Journal of the*  
25 *National Cancer Institute*. Jan 3 2007;99(1):14-23. doi:10.1093/jnci/djk001
- 26 28. Yabroff KR, Guy GP, Jr., Ekwueme DU, et al. Annual patient time costs associated with medical care  
27 among cancer survivors in the United States. *Medical care*. Jul 2014;52(7):594-601.  
28 doi:10.1097/mlr.0000000000000151
- 29 29. Zheng Z, Yabroff KR, Guy GP, Jr., et al. Annual Medical Expenditure and Productivity Loss Among  
30 Colorectal, Female Breast, and Prostate Cancer Survivors in the United States. *Journal of the National Cancer*  
31 *Institute*. May 2016;108(5)doi:10.1093/jnci/djv382
- 32  
33  
34  
35  
36  
37  
38  
39  
40  
41  
42  
43  
44  
45  
46  
47  
48  
49  
50  
51  
52  
53  
54  
55  
56  
57  
58  
59  
60

**Title** Cost-Effectiveness Analysis of the Federal Menu Calorie Labeling and Obesity-Associated Cancer Burdens in the United States

**Supplementary Table 1.** Defining Population and 32 Subgroups

**Supplementary Table 2.** Relative Risk Estimates of Etiologic Relationships Between Body Mass Index (BMI) and 13 Types of Cancers

**Supplementary Table 3.** Baseline Incidence Rates of 13 Cancers among US Adults by 32 Subgroups

**Supplementary Table 4.** Baseline 5-year Relative Survival Rates of 13 Cancers among US Adults by 32 Subgroups

**Supplementary Table 5.** Health-Related Quality of Life Among US Cancer Patients Aged 20 Years or Older, by Cancer Type and Phase of Care

**Supplementary Table 6.** Baseline Medical Costs, Productivity Loss, and Patient Time Costs Among US Cancer Patients Aged 20 Years or Older, by Cancer Type and Phase of Care

**Supplementary Table 7.** Baseline Medical Costs, Productivity Loss, and Patient Time Costs Among the General Population Aged 20 Years or Older in the US, by 32 Subgroups

**Supplementary Table 8.** Characteristics of US Adults Aged 20 Years or Older Participated in the NHANES, 2013-2016

**Supplementary Table 9.** Consumption of Calories from Full-Service and Fast-Food Restaurants among US Adults Participated in 2013-2016 NHANES, by 32 Subgroups

**Supplementary Table 10.** Estimated New Cancer Cases Averted by the Federal Menu Calorie Labeling in the US by Age, Sex, Race/Ethnicity, and Cancer Type, Over a Lifetime

**Supplementary Table 11.** Estimated Cancer Deaths Reduced by the Federal Menu Calorie Labeling in the US by Age, Sex, Race/Ethnicity, and Cancer Type, Over a Lifetime

**Supplementary Table 12.** Estimated Health Gains and Costs Associated with the Federal Menu Calorie Labeling on Reducing Cancer Burdens in the US Over a Lifetime, One-Way Sensitivity Analyses at 25% and 75% Calorie Compensations Outside the Restaurant Settings

**Supplementary Table 13.** Estimated Health Gains and Costs Associated with the Federal Menu Calorie Labeling on Reducing Cancer Burdens in the US Over a Lifetime, One-Way Sensitivity Analysis, Assuming all Full-Service and Fast-Food Restaurants were Covered by the Policy

**Supplementary Figure 1.** Diet and Cancer Outcome Model (DiCOM)

**Supplementary Figure 2.** Estimated Reduced New Cancer Cases and Deaths Associated with the Federal Menu Calorie Labeling in the US by Age, Sex, Race/Ethnicity, and Cancer Type, Over a Lifetime

**Supplementary Figure 3.** Estimated life Years and QALYs Gained Associated with the Federal Menu Calorie Labeling in the US by Age, Sex, and Race/Ethnicity, Over a Lifetime.

**Supplementary Figure 4.** Estimated Changes of Health-Related Costs Associated with the Federal Menu Calorie Labeling in the US by Age, Sex, Race/Ethnicity, and Cancer Type, Over a Lifetime

**Supplementary Figure 5.** Estimated Net Costs from Societal and Healthcare Perspectives Associated with the Federal Menu Calorie Labeling in the US by Age, Sex, and Race/Ethnicity, Over a Lifetime

**Supplementary Figure 6.** One-Way Sensitivity Analysis of Net Costs of the Federal Menu Calorie Labeling and Obesity-Associated Cancer Rates to Varying Assumptions of Key Input Parameters From (A) Societal Perspective and (B) Healthcare Perspective

**Supplementary Table 1.** Defining population and 32 subgroups

| <b>Subgroups</b> | <b>Age</b> | <b>Sex</b> | <b>Race/Ethnicity</b> |
|------------------|------------|------------|-----------------------|
| <b>1</b>         | 20-44y     | Female     | NHW                   |
| <b>2</b>         | 20-44y     | Female     | NHB                   |
| <b>3</b>         | 20-44y     | Female     | HISP                  |
| <b>4</b>         | 20-44y     | Female     | OTH                   |
| <b>5</b>         | 20-44y     | Male       | NHW                   |
| <b>6</b>         | 20-44y     | Male       | NHB                   |
| <b>7</b>         | 20-44y     | Male       | HISP                  |
| <b>8</b>         | 20-44y     | Male       | OTH                   |
| <b>9</b>         | 45-54y     | Female     | NHW                   |
| <b>10</b>        | 45-54y     | Female     | NHB                   |
| <b>11</b>        | 45-54y     | Female     | HISP                  |
| <b>12</b>        | 45-54y     | Female     | OTH                   |
| <b>13</b>        | 45-54y     | Male       | NHW                   |
| <b>14</b>        | 45-54y     | Male       | NHB                   |
| <b>15</b>        | 45-54y     | Male       | HISP                  |
| <b>16</b>        | 45-54y     | Male       | OTH                   |
| <b>17</b>        | 55-64y     | Female     | NHW                   |
| <b>18</b>        | 55-64y     | Female     | NHB                   |
| <b>19</b>        | 55-64y     | Female     | HISP                  |
| <b>20</b>        | 55-64y     | Female     | OTH                   |
| <b>21</b>        | 55-64y     | Male       | NHW                   |
| <b>22</b>        | 55-64y     | Male       | NHB                   |
| <b>23</b>        | 55-64y     | Male       | HISP                  |
| <b>24</b>        | 55-64y     | Male       | OTH                   |
| <b>25</b>        | 65+y       | Female     | NHW                   |
| <b>26</b>        | 65+y       | Female     | NHB                   |
| <b>27</b>        | 65+y       | Female     | HISP                  |
| <b>28</b>        | 65+y       | Female     | OTH                   |
| <b>29</b>        | 65+y       | Male       | NHW                   |
| <b>30</b>        | 65+y       | Male       | NHB                   |
| <b>31</b>        | 65+y       | Male       | HISP                  |
| <b>32</b>        | 65+y       | Male       | OTH                   |

**Supplementary Table 2.** Relative risk estimates of etiologic relationships between body mass index (BMI) and 13 types of cancers

| Cancer Type                    | No. of Studies | No. of Events | Source                   | Evidence Grading           | RR (95% CI)<br>Per 5 kg/m <sup>2</sup> | Statistical Heterogeneity         |
|--------------------------------|----------------|---------------|--------------------------|----------------------------|----------------------------------------|-----------------------------------|
| Endometrial                    | 26             | 18,717        | CUP, 2013                | Convincing<br>↑risk        | 1.50 (1.42-1.59)                       | I <sup>2</sup> =86.2%<br>P<0.0001 |
| Esophageal<br>(adenocarcinoma) | 9              | 1,725         | CUP, 2016                | Convincing<br>↑risk        | 1.48 (1.35-1.62)                       | I <sup>2</sup> =36.7%<br>P=0.13   |
| Kidney                         | 23             | 15,575        | CUP, 2015                | Convincing<br>↑risk        | 1.30 (1.25-1.35)                       | I <sup>2</sup> =38.8%<br>P=0.03   |
| Liver                          | 12             | 14,311        | CUP, 2015                | Convincing<br>↑risk        | 1.30 (1.16-1.46)                       | I <sup>2</sup> =78.3%<br>P=0.000  |
| Gallbladder                    | 8              | 6,004         | CUP, 2015                | Probable<br>↑risk          | 1.25 (1.15-1.37)                       | I <sup>2</sup> =52.3%<br>P=0.04   |
| Stomach (cardia)               | 7              | 2,050         | CUP, 2016                | Probable<br>↑risk          | 1.23 (1.07-1.40)                       | I <sup>2</sup> =55.6%<br>P=0.04   |
| Breast (post-<br>menopausal)   | 56             | 80,404        | CUP, 2017                | Convincing<br>↑risk        | 1.12 (1.09-1.15)                       | I <sup>2</sup> =75%<br>P<0.001    |
| Pancreas                       | 23             | 9,504         | CUP, 2011                | Convincing<br>↑risk        | 1.10 (1.07-1.14)                       | I <sup>2</sup> =19%<br>P=0.20     |
| Multiple myeloma               | 20             | 1,388         | IARC, 2016 <sup>30</sup> | Sufficient (IRAC)<br>↑risk | 1.09 (1.03-1.16)                       | Not reported                      |
| Prostate (advanced)            | 24             | 11,149        | CUP, 2014                | Probable<br>↑risk          | 1.08 (1.04-1.12)                       | I <sup>2</sup> =18.8%<br>P=0.21   |
| Thyroid                        | 22             | 3,100         | IARC, 2016 <sup>30</sup> | Sufficient (IARC)<br>↑risk | 1.06 (1.02-1.10)                       | Not reported                      |
| Ovary                          | 25             | 15,899        | CUP, 2013                | Probable<br>↑risk          | 1.06 (1.02-1.11)                       | I <sup>2</sup> =55.1%<br>P=0.001  |
| Colorectal                     | 38             | 71,089        | CUP, 2017                | Convincing<br>↑risk        | 1.05 (1.03-1.07)                       | I <sup>2</sup> =74.2%<br>P=0.000  |

**Supplementary Table 3. Baseline incidence rates of 13 cancers among US adults by 32 subgroups**

| Subgroup | Colorectal Cancer |       | Endometrial Cancer |      | Esophageal Adeno-carcinoma |      | Female Breast (Postmeno.) |       | Gallbladder Cancer |      | Kidney Cancer |      | Liver Cancer |      | Multiple Myeloma |      | Ovarian cancer |      | Pancreatic Cancer |      | Advanced Prostate Cancer |      | Stomach Cancer (Gastric Cardia) |      | Thyroid Cancer |      |
|----------|-------------------|-------|--------------------|------|----------------------------|------|---------------------------|-------|--------------------|------|---------------|------|--------------|------|------------------|------|----------------|------|-------------------|------|--------------------------|------|---------------------------------|------|----------------|------|
|          | Rate              | SE    | Rate               | SE   | Rate                       | SE   | Rate                      | SE    | Rate               | SE   | Rate          | SE   | Rate         | SE   | Rate             | SE   | Rate           | SE   | Rate              | SE   | Rate                     | SE   | Rate                            | SE   | Rate           | SE   |
| 1        | 8.53              | 0.38  | 6.54               | 3.66 | 0.05                       | 4.18 | 0.00                      | 0.00  | 0.05               | 2.57 | 3.83          | 3.16 | 0.49         | 4.18 | 0.38             | 4.66 | 4.31           | 0.27 | 107               | 3.46 | 0.00                     | 0.00 | 0.10                            | 3.82 | 28.97          | 0.69 |
| 2        | 7.78              | 0.74  | 5.04               | 0.59 | 0.03                       | 0.20 | 0.00                      | 0.00  | 0.07               | 2.46 | 3.57          | 0.50 | 0.56         | 0.20 | 102              | 0.27 | 2.98           | 0.45 | 103               | 0.26 | 0.00                     | 0.00 | 0.09                            | 2.25 | 13.12          | 0.95 |
| 3        | 6.09              | 0.55  | 7.49               | 3.32 | 0.03                       | 3.07 | 0.00                      | 0.00  | 0.06               | 2.48 | 3.73          | 3.16 | 0.42         | 3.07 | 0.33             | 3.71 | 3.95           | 0.46 | 0.86              | 0.87 | 0.00                     | 0.00 | 0.09                            | 2.27 | 20.97          | 1.13 |
| 4        | 6.36              | 1.10  | 6.56               | 1.13 | 0.02                       | 0.15 | 0.00                      | 0.00  | 0.07               | 2.58 | 1.87          | 0.40 | 0.32         | 0.15 | 0.38             | 0.23 | 4.49           | 0.70 | 0.74              | 0.25 | 0.00                     | 0.00 | 0.09                            | 2.36 | 24.88          | 2.21 |
| 5        | 9.20              | 0.39  | 0.00               | 0.00 | 0.42                       | 5.22 | 0.00                      | 0.00  | 0.04               | 0.02 | 5.91          | 4.53 | 0.60         | 5.22 | 0.48             | 5.26 | 0.00           | 0.00 | 122               | 2.06 | 0.21                     | 0.02 | 0.43                            | 4.32 | 6.93           | 0.34 |
| 6        | 7.94              | 0.78  | 0.00               | 0.00 | 0.29                       | 0.30 | 0.00                      | 0.00  | 0.04               | 0.02 | 5.47          | 0.65 | 1.17         | 0.30 | 148              | 0.34 | 0.00           | 0.00 | 100               | 0.28 | 0.56                     | 0.09 | 0.34                            | 3.42 | 2.36           | 0.42 |
| 7        | 6.15              | 0.54  | 0.00               | 0.00 | 0.31                       | 3.85 | 0.00                      | 0.00  | 0.04               | 0.02 | 4.04          | 3.82 | 0.82         | 3.85 | 0.57             | 0.18 | 0.00           | 0.00 | 0.83              | 0.20 | 0.13                     | 0.68 | 0.34                            | 3.53 | 3.80           | 0.44 |
| 8        | 6.21              | 0.85  | 0.00               | 0.00 | 0.31                       | 0.47 | 0.00                      | 0.00  | 0.05               | 0.02 | 3.68          | 1.04 | 1.59         | 0.47 | 0.70             | 140  | 0.00           | 0.00 | 0.82              | 0.29 | 0.41                     | 0.09 | 0.36                            | 3.52 | 5.70           | 0.84 |
| 9        | 4127              | 0.76  | 38.53              | 0.73 | 103                        | 0.21 | 124.56                    | 1.28  | 0.68               | 5.99 | 14.03         | 0.44 | 3.10         | 0.21 | 3.60             | 0.22 | 17.09          | 0.49 | 7.70              | 0.32 | 0.00                     | 0.00 | 0.88                            | 6.74 | 37.84          | 0.73 |
| 10       | 53.14             | 1.92  | 25.73              | 1.34 | 0.59                       | 0.60 | 121.73                    | 2.88  | 1.54               | 5.87 | 16.08         | 1.06 | 5.17         | 0.60 | 11.29            | 0.89 | 11.75          | 0.90 | 10.91             | 0.87 | 0.00                     | 0.00 | 0.94                            | 5.38 | 25.80          | 1.34 |
| 11       | 33.92             | 1.78  | 33.43              | 1.53 | 0.59                       | 0.52 | 77.25                     | 3.45  | 2.27               | 1.93 | 16.00         | 1.04 | 3.83         | 0.52 | 4.86             | 0.58 | 14.57          | 1.00 | 6.26              | 0.66 | 0.00                     | 0.00 | 0.81                            | 5.61 | 37.29          | 1.84 |
| 12       | 35.77             | 3.15  | 35.84              | 3.07 | 0.65                       | 0.66 | 91.82                     | 4.82  | 1.70               | 6.05 | 7.78          | 1.92 | 3.27         | 0.66 | 2.55             | 0.70 | 17.07          | 1.51 | 5.17              | 0.81 | 0.00                     | 0.00 | 0.85                            | 5.53 | 37.73          | 2.90 |
| 13       | 53.97             | 0.87  | 0.00               | 0.00 | 5.61                       | 0.36 | 0.00                      | 0.00  | 0.36               | 7.15 | 29.16         | 0.64 | 9.24         | 0.36 | 5.09             | 0.27 | 0.00           | 0.00 | 10.63             | 0.38 | 10.88                    | 0.16 | 3.65                            | 0.23 | 13.29          | 0.43 |
| 14       | 61.29             | 2.20  | 0.00               | 0.00 | 1.50                       | 1.02 | 0.00                      | 0.00  | 0.47               | 5.07 | 32.82         | 1.61 | 13.29        | 1.02 | 12.34            | 0.99 | 0.00           | 0.00 | 14.12             | 1.05 | 25.31                    | 0.58 | 1.90                            | 0.33 | 6.41           | 0.71 |
| 15       | 38.05             | 1.94  | 0.00               | 0.00 | 2.75                       | 1.06 | 0.00                      | 0.00  | 0.43               | 4.83 | 24.48         | 1.27 | 16.38        | 1.06 | 5.23             | 0.60 | 0.00           | 0.00 | 7.95              | 0.74 | 6.02                     | 0.38 | 1.96                            | 0.34 | 8.56           | 0.76 |
| 16       | 42.81             | 3.85  | 0.00               | 0.00 | 2.88                       | 2.28 | 0.00                      | 0.00  | 0.37               | 4.93 | 18.63         | 3.06 | 18.71        | 2.28 | 3.70             | 0.82 | 0.00           | 0.00 | 7.62              | 1.05 | 3.70                     | 0.50 | 2.51                            | 0.17 | 12.57          | 1.36 |
| 17       | 59.74             | 0.89  | 90.00              | 1.09 | 2.12                       | 0.35 | 305.45                    | 2.02  | 1.75               | 0.15 | 26.14         | 0.59 | 9.41         | 0.35 | 8.68             | 0.34 | 26.19          | 0.59 | 21.78             | 0.54 | 0.00                     | 0.00 | 1.72                            | 0.15 | 34.42          | 0.67 |
| 18       | 86.11             | 2.62  | 83.71              | 2.60 | 1.30                       | 1.21 | 306.22                    | 4.92  | 4.08               | 0.57 | 31.53         | 1.58 | 18.22        | 1.21 | 23.28            | 1.37 | 19.79          | 1.25 | 31.37             | 1.58 | 0.00                     | 0.00 | 1.92                            | 0.39 | 27.72          | 1.48 |
| 19       | 58.14             | 2.91  | 69.51              | 3.28 | 1.64                       | 1.33 | 218.85                    | 7.01  | 4.59               | 0.68 | 29.93         | 1.73 | 17.38        | 1.33 | 9.33             | 0.97 | 21.29          | 1.45 | 17.15             | 1.32 | 0.00                     | 0.00 | 1.87                            | 0.34 | 39.44          | 1.97 |
| 20       | 52.83             | 4.48  | 60.22              | 4.45 | 1.49                       | 1.97 | 233.48                    | 8.33  | 2.44               | 0.50 | 13.91         | 2.72 | 12.58        | 1.97 | 6.13             | 0.96 | 23.98          | 2.79 | 13.44             | 1.43 | 0.00                     | 0.00 | 1.57                            | 0.13 | 41.74          | 3.08 |
| 21       | 88.14             | 1.11  | 0.00               | 0.00 | 15.54                      | 0.73 | 0.00                      | 0.00  | 0.93               | 0.11 | 53.65         | 0.87 | 37.93        | 0.73 | 13.24            | 0.43 | 0.00           | 0.00 | 29.95             | 0.65 | 47.05                    | 0.34 | 9.19                            | 0.36 | 16.24          | 0.48 |
| 22       | 121.39            | 3.41  | 0.00               | 0.00 | 4.30                       | 2.72 | 0.00                      | 0.00  | 2.06               | 0.41 | 69.05         | 2.57 | 75.50        | 2.72 | 30.69            | 1.71 | 0.00           | 0.00 | 39.72             | 1.95 | 91.41                    | 1.22 | 4.87                            | 0.68 | 9.12           | 0.92 |
| 23       | 84.75             | 3.65  | 0.00               | 0.00 | 8.01                       | 2.98 | 0.00                      | 0.00  | 1.07               | 0.11 | 51.05         | 2.35 | 61.05        | 2.98 | 13.65            | 1.22 | 0.00           | 0.00 | 23.36             | 1.58 | 32.10                    | 1.21 | 5.15                            | 0.70 | 11.12          | 1.09 |
| 24       | 83.77             | 5.72  | 0.00               | 0.00 | 4.97                       | 4.85 | 0.00                      | 0.00  | 1.22               | 0.11 | 27.95         | 3.81 | 54.13        | 4.85 | 10.32            | 1.39 | 0.00           | 0.00 | 19.14             | 2.87 | 22.70                    | 1.31 | 5.16                            | 0.96 | 16.04          | 1.75 |
| 25       | 147.25            | 1.98  | 86.90              | 1.40 | 4.53                       | 0.62 | 429.43                    | 3.20  | 5.87               | 0.40 | 42.37         | 1.02 | 15.56        | 0.62 | 20.59            | 0.73 | 38.18          | 0.97 | 55.49             | 1.20 | 0.00                     | 0.00 | 4.36                            | 0.34 | 24.59          | 0.74 |
| 26       | 155.86            | 5.74  | 100.81             | 4.21 | 3.10                       | 1.98 | 398.07                    | 8.74  | 9.68               | 1.43 | 50.03         | 3.07 | 20.61        | 1.98 | 50.31            | 3.20 | 29.78          | 2.45 | 71.93             | 3.94 | 0.00                     | 0.00 | 3.41                            | 0.52 | 22.57          | 1.98 |
| 27       | 117.47            | 5.72  | 66.40              | 4.47 | 3.61                       | 3.17 | 285.07                    | 11.57 | 11.44              | 1.75 | 45.35         | 3.33 | 38.69        | 3.17 | 24.20            | 2.52 | 32.78          | 2.88 | 51.54             | 3.79 | 0.00                     | 0.00 | 3.89                            | 0.60 | 29.50          | 2.55 |
| 28       | 109.32            | 10.15 | 52.12              | 5.29 | 3.51                       | 4.72 | 266.14                    | 14.52 | 7.02               | 1.70 | 26.14         | 4.17 | 35.77        | 4.72 | 14.41            | 2.43 | 23.90          | 2.89 | 46.15             | 5.64 | 0.00                     | 0.00 | 4.11                            | 0.28 | 28.15          | 3.08 |
| 29       | 181.07            | 2.47  | 0.00               | 0.00 | 29.02                      | 1.10 | 0.00                      | 0.00  | 3.59               | 0.36 | 88.69         | 1.63 | 40.30        | 1.10 | 34.26            | 1.07 | 0.00           | 0.00 | 72.36             | 1.53 | 80.74                    | 0.61 | 19.38                           | 0.77 | 17.34          | 0.69 |
| 30       | 217.23            | 8.36  | 0.00               | 0.00 | 7.29                       | 3.98 | 0.00                      | 0.00  | 6.24               | 1.14 | 97.13         | 5.16 | 68.31        | 3.98 | 69.18            | 4.66 | 0.00           | 0.00 | 75.66             | 4.94 | 130.67                   | 2.34 | 8.81                            | 1.55 | 10.03          | 1.60 |
| 31       | 182.00            | 9.21  | 0.00               | 0.00 | 15.50                      | 5.01 | 0.00                      | 0.00  | 6.79               | 1.64 | 87.20         | 5.26 | 78.18        | 5.01 | 33.10            | 3.44 | 0.00           | 0.00 | 61.88             | 4.77 | 66.33                    | 2.57 | 11.49                           | 1.78 | 15.87          | 2.11 |
| 32       | 144.37            | 13.43 | 0.00               | 0.00 | 10.56                      | 7.52 | 0.00                      | 0.00  | 4.75               | 1.02 | 54.45         | 7.24 | 79.16        | 7.52 | 22.48            | 3.35 | 0.00           | 0.00 | 51.45             | 6.82 | 51.84                    | 2.78 | 11.34                           | 2.12 | 13.86          | 2.28 |



Supplementary Table 4. Baseline 5-year relative survival rates of 13 cancers among US adults by 32 subgroups

| Subgroup | Colorectal Cancer |       | Endometrial Cancer |       | Esophageal Adeno-carcinoma |       | Female Breast (Postmeno.) |       | Gallbladder Cancer |       | Kidney Cancer |       | Liver Cancer |       | Multiple Myeloma |       | Ovarian Cancer |       | Pancreatic Cancer |       | Advanced Prostate Cancer |       | Stomach Cancer (Gastric Cardia) |       | Thyroid Cancer |       |
|----------|-------------------|-------|--------------------|-------|----------------------------|-------|---------------------------|-------|--------------------|-------|---------------|-------|--------------|-------|------------------|-------|----------------|-------|-------------------|-------|--------------------------|-------|---------------------------------|-------|----------------|-------|
|          | Rate              | SE    | Rate               | SE    | Rate                       | SE    | Rate                      | SE    | Rate               | SE    | Rate          | SE    | Rate         | SE    | Rate             | SE    | Rate           | SE    | Rate              | SE    | Rate                     | SE    | Rate                            | SE    | Rate           | SE    |
| 1        | 0.740             | 0.012 | 0.916              | 0.009 | 0.223                      | 0.018 | 0.000                     | 0.000 | 0.095              | 0.095 | 0.953         | 0.009 | 0.409        | 0.057 | 0.852            | 0.043 | 0.780          | 0.015 | 0.379             | 0.038 | 0.000                    | 0.000 | 0.477                           | 0.099 | 1.000          | 0.001 |
| 2        | 0.652             | 0.024 | 0.775              | 0.027 | 0.223                      | 0.018 | 0.000                     | 0.000 | 0.286              | 0.064 | 0.856         | 0.029 | 0.144        | 0.113 | 0.837            | 0.048 | 0.736          | 0.036 | 0.530             | 0.064 | 0.000                    | 0.000 | 0.502                           | 0.205 | 0.993          | 0.004 |
| 3        | 0.659             | 0.022 | 0.900              | 0.013 | 0.223                      | 0.018 | 0.000                     | 0.000 | 0.309              | 0.092 | 0.864         | 0.021 | 0.403        | 0.081 | 0.713            | 0.075 | 0.716          | 0.024 | 0.493             | 0.062 | 0.000                    | 0.000 | 0.236                           | 0.116 | 0.992          | 0.002 |
| 4        | 0.694             | 0.027 | 0.910              | 0.016 | 0.223                      | 0.018 | 0.000                     | 0.000 | 0.286              | 0.064 | 0.819         | 0.043 | 0.321        | 0.077 | 0.787            | 0.122 | 0.737          | 0.029 | 0.371             | 0.076 | 0.000                    | 0.000 | 0.667                           | 0.193 | 1.000          | 0.002 |
| 5        | 0.682             | 0.012 | 0.000              | 0.000 | 0.140                      | 0.034 | 0.000                     | 0.000 | 0.302              | 0.117 | 0.886         | 0.010 | 0.251        | 0.037 | 0.696            | 0.041 | 0.000          | 0.000 | 0.275             | 0.032 | 0.768                    | 0.057 | 0.284                           | 0.045 | 0.997          | 0.002 |
| 6        | 0.601             | 0.027 | 0.000              | 0.000 | 0.160                      | 0.031 | 0.000                     | 0.000 | 0.357              | 0.096 | 0.779         | 0.027 | 0.157        | 0.045 | 0.606            | 0.057 | 0.000          | 0.000 | 0.151             | 0.046 | 0.780                    | 0.086 | 0.672                           | 0.274 | 0.949          | 0.025 |
| 7        | 0.621             | 0.022 | 0.000              | 0.000 | 0.330                      | 0.108 | 0.000                     | 0.000 | 0.357              | 0.096 | 0.847         | 0.020 | 0.227        | 0.047 | 0.635            | 0.064 | 0.000          | 0.000 | 0.157             | 0.044 | 0.470                    | 0.118 | 0.152                           | 0.055 | 0.993          | 0.007 |
| 8        | 0.635             | 0.029 | 0.000              | 0.000 | 0.287                      | 0.172 | 0.000                     | 0.000 | 0.357              | 0.096 | 0.840         | 0.033 | 0.152        | 0.032 | 0.649            | 0.108 | 0.000          | 0.000 | 0.230             | 0.066 | 0.805                    | 0.180 | 0.545                           | 0.133 | 0.992          | 0.008 |
| 9        | 0.738             | 0.007 | 0.889              | 0.006 | 0.300                      | 0.065 | 0.918                     | 0.003 | 0.153              | 0.045 | 0.846         | 0.011 | 0.283        | 0.027 | 0.682            | 0.027 | 0.614          | 0.012 | 0.195             | 0.017 | 0.000                    | 0.000 | 0.384                           | 0.060 | 0.997          | 0.002 |
| 10       | 0.666             | 0.015 | 0.751              | 0.022 | 0.290                      | 0.174 | 0.810                     | 0.009 | 0.155              | 0.059 | 0.834         | 0.025 | 0.145        | 0.035 | 0.626            | 0.034 | 0.497          | 0.034 | 0.177             | 0.029 | 0.000                    | 0.000 | 0.457                           | 0.144 | 0.990          | 0.008 |
| 11       | 0.725             | 0.016 | 0.869              | 0.012 | 0.751                      | 0.217 | 0.881                     | 0.008 | 0.224              | 0.062 | 0.879         | 0.018 | 0.242        | 0.038 | 0.617            | 0.047 | 0.595          | 0.025 | 0.209             | 0.035 | 0.000                    | 0.000 | 0.257                           | 0.079 | 0.983          | 0.005 |
| 12       | 0.731             | 0.018 | 0.893              | 0.012 | 0.308                      | 0.060 | 0.926                     | 0.007 | 0.210              | 0.082 | 0.810         | 0.037 | 0.287        | 0.051 | 0.686            | 0.071 | 0.640          | 0.027 | 0.307             | 0.055 | 0.000                    | 0.000 | 0.357                           | 0.152 | 0.991          | 0.005 |
| 13       | 0.704             | 0.007 | 0.000              | 0.000 | 0.255                      | 0.020 | 0.000                     | 0.000 | 0.321              | 0.072 | 0.790         | 0.009 | 0.171        | 0.011 | 0.627            | 0.023 | 0.000          | 0.000 | 0.136             | 0.012 | 0.858                    | 0.010 | 0.253                           | 0.024 | 0.964          | 0.007 |
| 14       | 0.612             | 0.015 | 0.000              | 0.000 | 0.186                      | 0.085 | 0.000                     | 0.000 | 0.371              | 0.127 | 0.793         | 0.020 | 0.117        | 0.019 | 0.616            | 0.037 | 0.000          | 0.000 | 0.138             | 0.022 | 0.814                    | 0.020 | 0.148                           | 0.059 | 0.970          | 0.027 |
| 15       | 0.652             | 0.015 | 0.000              | 0.000 | 0.222                      | 0.050 | 0.000                     | 0.000 | 0.151              | 0.082 | 0.742         | 0.019 | 0.181        | 0.016 | 0.640            | 0.044 | 0.000          | 0.000 | 0.101             | 0.021 | 0.729                    | 0.029 | 0.257                           | 0.060 | 0.945          | 0.019 |
| 16       | 0.721             | 0.017 | 0.000              | 0.000 | 0.308                      | 0.110 | 0.000                     | 0.000 | 0.751              | 0.153 | 0.799         | 0.027 | 0.239        | 0.023 | 0.594            | 0.066 | 0.000          | 0.000 | 0.162             | 0.039 | 0.865                    | 0.040 | 0.298                           | 0.080 | 0.960          | 0.018 |
| 17       | 0.694             | 0.007 | 0.878              | 0.004 | 0.322                      | 0.043 | 0.918                     | 0.002 | 0.273              | 0.035 | 0.793         | 0.010 | 0.208        | 0.015 | 0.630            | 0.019 | 0.531          | 0.011 | 0.117             | 0.009 | 0.000                    | 0.000 | 0.334                           | 0.041 | 0.994          | 0.002 |
| 18       | 0.621             | 0.014 | 0.667              | 0.015 | 0.298                      | 0.039 | 0.830                     | 0.007 | 0.151              | 0.043 | 0.805         | 0.022 | 0.219        | 0.028 | 0.609            | 0.027 | 0.371          | 0.028 | 0.112             | 0.018 | 0.000                    | 0.000 | 0.440                           | 0.113 | 0.971          | 0.012 |
| 19       | 0.673             | 0.016 | 0.816              | 0.013 | 0.241                      | 0.131 | 0.879                     | 0.006 | 0.173              | 0.044 | 0.769         | 0.021 | 0.211        | 0.025 | 0.535            | 0.042 | 0.473          | 0.025 | 0.104             | 0.019 | 0.000                    | 0.000 | 0.279                           | 0.101 | 0.969          | 0.009 |
| 20       | 0.714             | 0.017 | 0.847              | 0.013 | 0.298                      | 0.039 | 0.911                     | 0.006 | 0.151              | 0.061 | 0.785         | 0.032 | 0.288        | 0.033 | 0.631            | 0.051 | 0.555          | 0.031 | 0.164             | 0.027 | 0.000                    | 0.000 | 0.281                           | 0.140 | 0.987          | 0.008 |
| 21       | 0.666             | 0.006 | 0.000              | 0.000 | 0.257                      | 0.013 | 0.000                     | 0.000 | 0.190              | 0.045 | 0.760         | 0.008 | 0.202        | 0.007 | 0.603            | 0.016 | 0.000          | 0.000 | 0.111             | 0.007 | 0.878                    | 0.006 | 0.255                           | 0.016 | 0.954          | 0.009 |
| 22       | 0.579             | 0.013 | 0.000              | 0.000 | 0.178                      | 0.072 | 0.000                     | 0.000 | 0.261              | 0.105 | 0.758         | 0.019 | 0.140        | 0.012 | 0.545            | 0.028 | 0.000          | 0.000 | 0.080             | 0.014 | 0.786                    | 0.014 | 0.148                           | 0.046 | 0.945          | 0.039 |
| 23       | 0.628             | 0.014 | 0.000              | 0.000 | 0.135                      | 0.033 | 0.000                     | 0.000 | 0.203              | 0.081 | 0.717         | 0.018 | 0.170        | 0.013 | 0.541            | 0.037 | 0.000          | 0.000 | 0.078             | 0.015 | 0.777                    | 0.017 | 0.281                           | 0.053 | 0.899          | 0.028 |
| 24       | 0.654             | 0.015 | 0.000              | 0.000 | 0.237                      | 0.082 | 0.000                     | 0.000 | 0.148              | 0.069 | 0.698         | 0.025 | 0.268        | 0.017 | 0.485            | 0.050 | 0.000          | 0.000 | 0.122             | 0.023 | 0.885                    | 0.019 | 0.257                           | 0.061 | 0.967          | 0.022 |
| 25       | 0.610             | 0.005 | 0.799              | 0.006 | 0.182                      | 0.024 | 0.907                     | 0.003 | 0.179              | 0.018 | 0.679         | 0.010 | 0.119        | 0.010 | 0.420            | 0.012 | 0.323          | 0.008 | 0.057             | 0.003 | 0.000                    | 0.000 | 0.231                           | 0.023 | 0.958          | 0.005 |
| 26       | 0.551             | 0.012 | 0.552              | 0.016 | 0.170                      | 0.143 | 0.806                     | 0.008 | 0.217              | 0.043 | 0.709         | 0.024 | 0.097        | 0.020 | 0.407            | 0.022 | 0.210          | 0.021 | 0.059             | 0.009 | 0.000                    | 0.000 | 0.264                           | 0.068 | 0.894          | 0.023 |
| 27       | 0.579             | 0.013 | 0.699              | 0.017 | 0.190                      | 0.073 | 0.858                     | 0.008 | 0.125              | 0.023 | 0.677         | 0.022 | 0.087        | 0.014 | 0.353            | 0.027 | 0.298          | 0.022 | 0.049             | 0.009 | 0.000                    | 0.000 | 0.257                           | 0.060 | 0.889          | 0.020 |
| 28       | 0.599             | 0.013 | 0.735              | 0.020 | 0.180                      | 0.022 | 0.900                     | 0.007 | 0.115              | 0.030 | 0.614         | 0.032 | 0.187        | 0.017 | 0.440            | 0.040 | 0.356          | 0.029 | 0.043             | 0.008 | 0.000                    | 0.000 | 0.187                           | 0.067 | 0.858          | 0.023 |
| 29       | 0.615             | 0.005 | 0.000              | 0.000 | 0.212                      | 0.011 | 0.000                     | 0.000 | 0.134              | 0.025 | 0.680         | 0.008 | 0.119        | 0.007 | 0.402            | 0.011 | 0.000          | 0.000 | 0.075             | 0.004 | 0.717                    | 0.007 | 0.220                           | 0.013 | 0.935          | 0.015 |
| 30       | 0.498             | 0.014 | 0.000              | 0.000 | 0.164                      | 0.069 | 0.000                     | 0.000 | 0.209              | 0.076 | 0.705         | 0.024 | 0.134        | 0.019 | 0.459            | 0.027 | 0.000          | 0.000 | 0.049             | 0.011 | 0.569                    | 0.017 | 0.174                           | 0.052 | 0.810          | 0.068 |
| 31       | 0.544             | 0.013 | 0.000              | 0.000 | 0.155                      | 0.035 | 0.000                     | 0.000 | 0.144              | 0.046 | 0.668         | 0.020 | 0.107        | 0.012 | 0.398            | 0.028 | 0.000          | 0.000 | 0.066             | 0.011 | 0.674                    | 0.017 | 0.141                           | 0.032 | 0.786          | 0.048 |
| 32       | 0.625             | 0.013 | 0.000              | 0.000 | 0.126                      | 0.049 | 0.000                     | 0.000 | 0.263              | 0.071 | 0.653         | 0.026 | 0.182        | 0.014 | 0.431            | 0.037 | 0.000          | 0.000 | 0.080             | 0.013 | 0.733                    | 0.020 | 0.255                           | 0.042 | 0.800          | 0.039 |

**Supplementary Table 5.** Health-related quality of life among US cancer patients aged 20 years or older, by cancer type and phase of care

| Cancer Type                     | Cancer Phase | Health Related Quality of Life | Source                               |
|---------------------------------|--------------|--------------------------------|--------------------------------------|
|                                 |              | mean (SE)                      |                                      |
| Endometrial                     | Overall      | 0.80 (0.14)                    | Naik et al. <sup>31</sup>            |
| Esophageal Adenocarcinoma       | Overall      | 0.69 (0.26)                    | Wildi et al. <sup>32</sup>           |
| Kidney                          | Overall      | 0.78 (0.14)                    | Pickard et al. <sup>33</sup>         |
| Liver                           | Overall      | 0.79 (0.19)                    | Naik et al. <sup>31</sup>            |
| Gallbladder                     | Overall      | 0.79 (0.19)                    | Naik et al. <sup>31</sup>            |
| Stomach (gastric cardia)        | Initial:     | 0.84 (0.25)                    | Zhou et al. <sup>34</sup>            |
|                                 | Continuous:  | 0.86 (0.24)                    |                                      |
|                                 | End of Life: | 0.65 (0.33)                    |                                      |
| Female Breast (post-menopausal) | Initial:     | 0.78 (0.19)                    | Yabroff et al. <sup>35</sup>         |
|                                 | Continuous:  | 0.81 (0.20)                    |                                      |
|                                 | End of Life: | 0.64 (0.16)                    |                                      |
| Pancreas                        | Overall      | 0.65 (0.30)                    | Müller-Nordhorn et al. <sup>36</sup> |
| Multiple myeloma                | Overall      | 0.79 (0.19)                    | Naik et al. <sup>31</sup>            |
| Advanced Prostate               | Initial:     | 0.78 (0.20)                    | Yabroff et al. <sup>35</sup>         |
|                                 | Continuous:  | 0.76 (0.19)                    |                                      |
|                                 | End of Life: | 0.59 (0.15)                    |                                      |
| Thyroid                         | Overall      | 0.85 (0.13)                    | Naik et al. <sup>31</sup>            |
| Ovary                           | Overall      | 0.77 (0.17)                    | Pickard et al. <sup>33</sup>         |
| Colorectal                      | Initial:     | 0.760 (0.19)                   | Färkkilä et al. <sup>37</sup>        |
|                                 | Continuous:  | 0.835 (0.20)                   |                                      |
|                                 | End of Life: | 0.643 (0.26)                   |                                      |

**Supplementary Table 6.** Baseline medical costs, productivity loss, and patient time costs among US cancer patients aged 20 years or older, by cancer type

| Cancer type               | Sex    | Age | Medical costs |            |             | Productivity loss |            |             | Patient time cost |            |             |
|---------------------------|--------|-----|---------------|------------|-------------|-------------------|------------|-------------|-------------------|------------|-------------|
|                           |        |     | Initial       | Continuous | End-of-life | Initial           | Continuous | End-of-life | Initial           | Continuous | End-of-life |
| Esophageal Adenocarcinoma | Female | <65 | 95439         | 6853       | 156417      | 4884              | 3757       | 15027       | 650               | 500        | 2001        |
|                           |        | ≥65 | 79532         | 6853       | 104278      | 6984              | 5372       | 21489       | 1187              | 913        | 3652        |
|                           | Male   | <65 | 95787         | 6450       | 155612      | 4884              | 3757       | 15027       | 650               | 500        | 2001        |
|                           |        | ≥65 | 79822         | 6450       | 103742      | 6984              | 5372       | 21489       | 1187              | 913        | 3652        |
| Stomach (Gastric Cardia)  | Female | <65 | 85291         | 3977       | 155636      | 4884              | 3757       | 15027       | 650               | 500        | 2001        |
|                           |        | ≥65 | 71076         | 3977       | 103758      | 6984              | 5372       | 21489       | 1187              | 913        | 3652        |
|                           | Male   | <65 | 94144         | 4282       | 160695      | 4884              | 3757       | 15027       | 650               | 500        | 2001        |
|                           |        | ≥65 | 78453         | 4282       | 107130      | 6984              | 5372       | 21489       | 1187              | 913        | 3652        |
| Liver                     | Female | <65 | 40173         | 5859       | 95782       | 4884              | 3757       | 15027       | 650               | 500        | 2001        |
|                           |        | ≥65 | 40173         | 5859       | 95782       | 6984              | 5372       | 21489       | 1187              | 913        | 3652        |
|                           | Male   | <65 | 41161         | 7363       | 97473       | 4884              | 3757       | 15027       | 650               | 500        | 2001        |
|                           |        | ≥65 | 41161         | 7363       | 97473       | 6984              | 5372       | 21489       | 1187              | 913        | 3652        |
| Pancreatic                | Female | <65 | 112154        | 8672       | 164911      | 4884              | 3757       | 15027       | 650               | 500        | 2001        |
|                           |        | ≥65 | 93462         | 8672       | 109941      | 6984              | 5372       | 21489       | 1187              | 913        | 3652        |
|                           | Male   | <65 | 112911        | 11697      | 169673      | 4884              | 3757       | 15027       | 650               | 500        | 2001        |
|                           |        | ≥65 | 94092         | 11697      | 113115      | 6984              | 5372       | 21489       | 1187              | 913        | 3652        |
| Advanced Prostate         | Male   | <65 | 23652         | 3201       | 93363       | 3715              | 2858       | 11432       | 650               | 500        | 2001        |
|                           |        | ≥65 | 19710         | 3201       | 62242       | 6549              | 5038       | 20152       | 1187              | 913        | 3652        |
| Colorectal                | Female | <65 | 61593         | 3159       | 126778      | 10330             | 7946       | 31784       | 650               | 500        | 2001        |
|                           |        | ≥65 | 51327         | 3159       | 84519       | 7479              | 5753       | 23012       | 1187              | 913        | 3652        |

|    |                         |        |     |       |      |        |       |      |       |      |     |      |
|----|-------------------------|--------|-----|-------|------|--------|-------|------|-------|------|-----|------|
| 1  |                         |        |     |       |      |        |       |      |       |      |     |      |
| 2  |                         | Male   | <65 | 62174 | 4595 | 128507 | 10330 | 7946 | 31784 | 650  | 500 | 2001 |
| 3  |                         |        | ≥65 | 51812 | 4595 | 85671  | 7479  | 5753 | 23012 | 1187 | 913 | 3652 |
| 4  |                         |        |     |       |      |        |       |      |       |      |     |      |
| 5  |                         |        |     |       |      |        |       |      |       |      |     |      |
| 6  | Endometrial             | Female | <65 | 32129 | 1535 | 105262 | 4884  | 3757 | 15027 | 650  | 500 | 2001 |
| 7  |                         |        | ≥65 | 26775 | 1535 | 70175  | 6984  | 5372 | 21489 | 1187 | 913 | 3652 |
| 8  |                         |        |     |       |      |        |       |      |       |      |     |      |
| 9  |                         |        |     |       |      |        |       |      |       |      |     |      |
| 10 | Ovarian                 | Female | <65 | 98788 | 8296 | 149573 | 4884  | 3757 | 15027 | 650  | 500 | 2001 |
| 11 |                         |        | ≥65 | 82324 | 8296 | 99715  | 6984  | 5372 | 21489 | 1187 | 913 | 3652 |
| 12 |                         |        |     |       |      |        |       |      |       |      |     |      |
| 13 |                         |        |     |       |      |        |       |      |       |      |     |      |
| 14 | Gallbladder             | Female | <65 | 40173 | 5859 | 95782  | 4884  | 3757 | 15027 | 650  | 500 | 2001 |
| 15 |                         |        | ≥65 | 40173 | 5859 | 95782  | 6984  | 5372 | 21489 | 1187 | 913 | 3652 |
| 16 |                         | Male   | <65 | 41161 | 7363 | 97473  | 4884  | 3757 | 15027 | 650  | 500 | 2001 |
| 17 |                         |        | ≥65 | 41161 | 7363 | 97473  | 6984  | 5372 | 21489 | 1187 | 913 | 3652 |
| 18 |                         |        |     |       |      |        |       |      |       |      |     |      |
| 19 |                         |        |     |       |      |        |       |      |       |      |     |      |
| 20 |                         |        |     |       |      |        |       |      |       |      |     |      |
| 21 | Kidney (Renal Cell)     | Female | <65 | 46077 | 6255 | 110765 | 4884  | 3757 | 15027 | 650  | 500 | 2001 |
| 22 |                         |        | ≥65 | 38397 | 6255 | 73843  | 6984  | 5372 | 21489 | 1187 | 913 | 3652 |
| 23 |                         | Male   | <65 | 46048 | 6018 | 117123 | 4884  | 3757 | 15027 | 650  | 500 | 2001 |
| 24 |                         |        | ≥65 | 38374 | 6018 | 78082  | 6984  | 5372 | 21489 | 1187 | 913 | 3652 |
| 25 |                         |        |     |       |      |        |       |      |       |      |     |      |
| 26 |                         |        |     |       |      |        |       |      |       |      |     |      |
| 27 |                         |        |     |       |      |        |       |      |       |      |     |      |
| 28 | Breast (Postmenopausal) | Female | <65 | 27693 | 2207 | 94284  | 5985  | 4604 | 18416 | 650  | 500 | 2001 |
| 29 |                         |        | ≥65 | 23078 | 2207 | 62856  | 4752  | 3655 | 14620 | 1187 | 913 | 3652 |
| 30 |                         |        |     |       |      |        |       |      |       |      |     |      |
| 31 |                         |        |     |       |      |        |       |      |       |      |     |      |
| 32 | Thyroid                 | Female | <65 | 40173 | 5859 | 95782  | 4884  | 3757 | 15027 | 650  | 500 | 2001 |
| 33 |                         |        | ≥65 | 40173 | 5859 | 95782  | 6984  | 5372 | 21489 | 1187 | 913 | 3652 |
| 34 |                         | Male   | <65 | 41161 | 7363 | 97473  | 4884  | 3757 | 15027 | 650  | 500 | 2001 |
| 35 |                         |        | ≥65 | 41161 | 7363 | 97473  | 6984  | 5372 | 21489 | 1187 | 913 | 3652 |
| 36 |                         |        |     |       |      |        |       |      |       |      |     |      |
| 37 |                         |        |     |       |      |        |       |      |       |      |     |      |
| 38 |                         |        |     |       |      |        |       |      |       |      |     |      |
| 39 | Multiple Myeloma        | Female | <65 | 40173 | 5859 | 95782  | 4884  | 3757 | 15027 | 650  | 500 | 2001 |
| 40 |                         |        | ≥65 | 40173 | 5859 | 95782  | 6984  | 5372 | 21489 | 1187 | 913 | 3652 |
| 41 |                         |        |     |       |      |        |       |      |       |      |     |      |
| 42 |                         |        |     |       |      |        |       |      |       |      |     |      |
| 43 |                         |        |     |       |      |        |       |      |       |      |     |      |
| 44 |                         |        |     |       |      |        |       |      |       |      |     |      |
| 45 |                         |        |     |       |      |        |       |      |       |      |     |      |
| 46 |                         |        |     |       |      |        |       |      |       |      |     |      |
| 47 |                         |        |     |       |      |        |       |      |       |      |     |      |

1  
2  
3  
4  
5  
6  
7  
8  
9  
10  
11  
12  
13  
14  
15  
16  
17  
18  
19  
20  
21  
22  
23  
24  
25  
26  
27  
28  
29  
30  
31  
32  
33  
34  
35  
36  
37  
38  
39  
40  
41  
42  
43  
44  
45  
46  
47

|      |     |       |      |       |      |      |       |      |     |      |
|------|-----|-------|------|-------|------|------|-------|------|-----|------|
| Male | <65 | 41161 | 7363 | 97473 | 4884 | 3757 | 15027 | 650  | 500 | 2001 |
|      | ≥65 | 41161 | 7363 | 97473 | 6984 | 5372 | 21489 | 1187 | 913 | 3652 |

---

For peer review only

**Supplementary Table 7.** Baseline medical costs, productivity loss, and patient time cost among general population aged 20 years or older in the US, by 32 subgroups

| Age group, years | Sex    | Race/ethnicity | Medical costs        |                   | Productivity loss    |                   | Patient time cost    |                   |
|------------------|--------|----------------|----------------------|-------------------|----------------------|-------------------|----------------------|-------------------|
|                  |        |                | Annual general costs | End-of-life costs | Annual general costs | End-of-life costs | Annual general costs | End-of-life costs |
| 20-44            | Female | NHW            | 4020                 | 40000             | 2040                 | 8160              | 226                  | 904               |
|                  |        | NHB            | 3100                 | 40000             | 2040                 | 8160              | 226                  | 904               |
|                  |        | Hispanic       | 2355                 | 40000             | 2040                 | 8160              | 226                  | 904               |
|                  |        | Other          | 2617                 | 40000             | 2040                 | 8160              | 226                  | 904               |
|                  | Male   | NHW            | 2022                 | 40000             | 2040                 | 8160              | 226                  | 904               |
|                  |        | NHB            | 2279                 | 40000             | 2040                 | 8160              | 226                  | 904               |
|                  |        | Hispanic       | 1145                 | 40000             | 2040                 | 8160              | 226                  | 904               |
|                  |        | Other          | 1803                 | 40000             | 2040                 | 8160              | 226                  | 904               |
| 45-54            | Female | NHW            | 5371                 | 40000             | 2040                 | 8160              | 226                  | 904               |
|                  |        | NHB            | 5712                 | 40000             | 2040                 | 8160              | 226                  | 904               |
|                  |        | Hispanic       | 3196                 | 40000             | 2040                 | 8160              | 226                  | 904               |
|                  |        | Other          | 4082                 | 40000             | 2040                 | 8160              | 226                  | 904               |
|                  | Male   | NHW            | 3812                 | 40000             | 2040                 | 8160              | 226                  | 904               |
|                  |        | NHB            | 3639                 | 40000             | 2040                 | 8160              | 226                  | 904               |
|                  |        | Hispanic       | 3612                 | 40000             | 2040                 | 8160              | 226                  | 904               |
|                  |        | Other          | 2560                 | 40000             | 2040                 | 8160              | 226                  | 904               |
| 55-64            | Female | NHW            | 7300                 | 40000             | 2040                 | 8160              | 226                  | 904               |
|                  |        | NHB            | 5479                 | 40000             | 2040                 | 8160              | 226                  | 904               |
|                  |        | Hispanic       | 4607                 | 40000             | 2040                 | 8160              | 226                  | 904               |
|                  |        | Other          | 3951                 | 40000             | 2040                 | 8160              | 226                  | 904               |
|                  | Male   | NHW            | 6519                 | 40000             | 2040                 | 8160              | 226                  | 904               |
|                  |        | NHB            | 6455                 | 40000             | 2040                 | 8160              | 226                  | 904               |
|                  |        | Hispanic       | 5077                 | 40000             | 2040                 | 8160              | 226                  | 904               |
|                  |        | Other          | 6320                 | 40000             | 2040                 | 8160              | 226                  | 904               |
| ≥65              | Female | NHW            | 8997                 | 40000             | 4409                 | 8160              | 607                  | 904               |
|                  |        | NHB            | 9585                 | 40000             | 4409                 | 8160              | 607                  | 904               |
|                  |        | Hispanic       | 8847                 | 40000             | 4409                 | 8160              | 607                  | 904               |
|                  |        | Other          | 8625                 | 40000             | 4409                 | 8160              | 607                  | 904               |
|                  | Male   | NHW            | 9334                 | 40000             | 4409                 | 8160              | 607                  | 904               |
|                  |        | NHB            | 7367                 | 40000             | 4409                 | 8160              | 607                  | 904               |
|                  |        | Hispanic       | 5640                 | 40000             | 4409                 | 8160              | 607                  | 904               |
|                  |        | Other          | 7461                 | 40000             | 4409                 | 8160              | 607                  | 904               |

**Supplementary Table 8.** Characteristics of US adults aged 20 years or older participated in the NHANES, 2013-2016

| Characteristics<br>(N=10064)                   | Calorie Consumption, kcal/day |
|------------------------------------------------|-------------------------------|
| <b>Age, years</b>                              | 47.8 ± 0.41                   |
| <b>Age groups, years, N (%)</b>                |                               |
| 20-44                                          | 4319 (44.5)      425 ± 4.38   |
| 25-54                                          | 1704 (18.3)      315 ± 5.39   |
| 55-64                                          | 1725 (17.3)      271 ± 4.90   |
| ≥65                                            | 2316 (19.9)      192 ± 3.83   |
| <b>Sex, N (%)</b>                              |                               |
| Male                                           | 4829 (48.3)      388 ± 4.53   |
| Female                                         | 5235 (51.7)      279 ± 4.04   |
| <b>Race/ethnicity, N (%)</b>                   |                               |
| Non-Hispanic White                             | 3944 (65.0)      320 ± 4.76   |
| Non-Hispanic Black                             | 2069 (11.2)      361 ± 6.55   |
| Hispanic                                       | 2668 (14.9)      367 ± 4.44   |
| Other                                          | 1383 (8.90)      325 ± 8.12   |
| <b>Education, N (%)</b>                        |                               |
| Less than high school graduate                 | 2178 (14.2)      311 ± 5.14   |
| High school graduate                           | 2249 (21.6)      332 ± 5.72   |
| Some college                                   | 3070 (33.1)      341 ± 4.92   |
| College graduate                               | 2562 (31.0)      332 ± 7.10   |
| <b>Family income to poverty ratio, N (%)</b>   |                               |
| <1.30                                          | 3862 (28.3)      325 ± 4.87   |
| 1.30-1.84                                      | 2842 (26.7)      333 ± 4.55   |
| 1.85-2.99                                      | 1725 (20.4)      344 ± 6.73   |
| ≥3.00                                          | 1635 (24.5)      328 ± 7.01   |
| <b>Body mass index (BMI), kg/m<sup>2</sup></b> | 29.3 ± 0.16                   |
| <b>Weight status, N (%)</b>                    |                               |
| Underweight (BMI<18.5)                         | 145 (1.36)      341 ± 17.5    |
| Normal weight (BMI=18.5-24.9)                  | 2671 (27.2)      327 ± 4.81   |
| Overweight/Obese (BMI≥25)                      | 7163 (71.4)      334 ± 4.01   |

**Supplementary Table 9.** Consumption of calories from full-service and fast-food restaurants among US adults participated in 2013-2016 NHANES by 32 subgroups

| Age group, years | Sex    | Race/ethnicity | Baseline consumption,<br>kcal/day<br>(mean ± SE) |
|------------------|--------|----------------|--------------------------------------------------|
| 20-44            | Female | NHW            | 357 ± 6.47                                       |
|                  |        | NHB            | 397 ± 8.98                                       |
|                  |        | Hispanic       | 364 ± 6.77                                       |
|                  |        | Other          | 334 ± 11.3                                       |
|                  | Male   | NHW            | 485 ± 9.00                                       |
|                  |        | NHB            | 508 ± 12.3                                       |
|                  |        | Hispanic       | 500 ± 13.7                                       |
|                  |        | Other          | 466 ± 14.1                                       |
| 45-54            | Female | NHW            | 270 ± 9.38                                       |
|                  |        | NHB            | 266 ± 7.85                                       |
|                  |        | Hispanic       | 265 ± 9.11                                       |
|                  |        | Other          | 228 ± 14.6                                       |
|                  | Male   | NHW            | 374 ± 11.3                                       |
|                  |        | NHB            | 388 ± 17.4                                       |
|                  |        | Hispanic       | 355 ± 15.0                                       |
|                  |        | Other          | 338 ± 20.2                                       |
| 55-64            | Female | NHW            | 231 ± 5.25                                       |
|                  |        | NHB            | 249 ± 9.58                                       |
|                  |        | Hispanic       | 234 ± 7.99                                       |
|                  |        | Other          | 216 ± 10.2                                       |
|                  | Male   | NHW            | 315 ± 9.55                                       |
|                  |        | NHB            | 314 ± 18.3                                       |
|                  |        | Hispanic       | 307 ± 9.90                                       |
|                  |        | Other          | 298 ± 11.1                                       |
| ≥65              | Female | NHW            | 164 ± 4.71                                       |
|                  |        | NHB            | 156 ± 6.07                                       |
|                  |        | Hispanic       | 158 ± 5.27                                       |
|                  | Male   | Other          | 137 ± 5.43                                       |
|                  |        | NHW            | 235 ± 7.43                                       |
|                  |        | NHB            | 220 ± 7.07                                       |
|                  |        | Hispanic       | 218 ± 8.07                                       |



1  
2  
3  
4  
5  
6  
7  
8  
9  
10  
11  
12  
13  
14  
15  
16  
17  
18  
19  
20  
21  
22  
23  
24  
25  
26  
27  
28  
29  
30  
31  
32  
33  
34  
35  
36  
37  
38  
39  
40  
41  
42  
43  
44  
45  
46  
47

Other

198 ± 20.0

---

For peer review only

**Supplementary Table 10.** Estimated new cancer cases averted by the federal menu calorie labeling in the US by age, sex, race/ethnicity, and cancer type, over lifetime (U.S. population=235,162,844)<sup>1</sup>

| Cancer Type                    | Policy Scenario           | 20-44 y                |      | 45-54 y                 |      | 55-64 y               |      | 65 + y               |      |
|--------------------------------|---------------------------|------------------------|------|-------------------------|------|-----------------------|------|----------------------|------|
|                                |                           | Female                 | Male | Female                  | Male | Female                | Male | Female               | Male |
| <b>Endometrial</b>             |                           |                        |      |                         |      |                       |      |                      |      |
| Age                            | <i>consumer behavior</i>  | 3300 (696 to 6090)     |      | 591 (-990 to 2160)      |      | 1140 (433 to 1940)    |      | 656 (107 to 1190)    |      |
|                                | <i>+industry response</i> | 5960 (3360 to 8890)    |      | 1340 (-208 to 2980)     |      | 1600 (928 to 2430)    |      | 926 (396 to 1460)    |      |
| Race/Ethnicity                 |                           |                        |      |                         |      |                       |      |                      |      |
| Non-Hispanic White             | <i>consumer behavior</i>  | 1630<br>(-711 to 4080) | 0    | -136<br>(-1590 to 1430) | 0    | 757<br>(140 to 1500)  | 0    | 572<br>(38 to 1070)  | 0    |
|                                | <i>+industry response</i> | 3080<br>(829 to 5780)  | 0    | 369<br>(-1100 to 1950)  | 0    | 1110<br>(463 to 1830) | 0    | 780<br>(245 to 1290) | 0    |
| Non-Hispanic Black             | <i>consumer behavior</i>  | 763<br>(-157 to 1710)  | 0    | 258<br>(-23 to 543)     | 0    | 283<br>(73 to 528)    | 0    | 47<br>(-43 to 150)   | 0    |
|                                | <i>+industry response</i> | 1240<br>(316 to 2200)  | 0    | 372<br>(93 to 668)      | 0    | 355<br>(146 to 604)   | 0    | 77<br>(-13 to 176)   | 0    |
| Hispanic                       | <i>consumer behavior</i>  | 910<br>(74 to 1790)    | 0    | 290<br>(-48 to 596)     | 0    | 42<br>(-83 to 185)    | 0    | 43<br>(-16 to 102)   | 0    |
|                                | <i>+industry response</i> | 1460<br>(580 to 2340)  | 0    | 399<br>(66 to 703)      | 0    | 89<br>(-35 to 233)    | 0    | 64<br>(5 to 122)     | 0    |
| Other                          | <i>consumer behavior</i>  | 19<br>(-312 to 402)    | 0    | 165<br>(41 to 319)      | 0    | 54<br>(3 to 109)      | 0    | -6<br>(-26 to 14)    | 0    |
|                                | <i>+industry response</i> | 150<br>(-174 to 546)   | 0    | 191<br>(68 to 344)      | 0    | 68<br>(18 to 124)     | 0    | 0<br>(-21 to 21)     | 0    |
| <b>Breast (Postmenopausal)</b> |                           |                        |      |                         |      |                       |      |                      |      |
| Age                            | <i>consumer behavior</i>  | 2530 (263 to 5040)     |      | 373 (-1070 to 1950)     |      | 1210 (480 to 2130)    |      | 742 (137 to 1380)    |      |
|                                | <i>+industry response</i> | 4670 (2330 to 7350)    |      | 1040 (-390 to 2680)     |      | 1710 (1010 to 2640)   |      | 1040 (433 to 1700)   |      |
| Race/Ethnicity                 |                           |                        |      |                         |      |                       |      |                      |      |
| Non-Hispanic White             | <i>consumer behavior</i>  | 1370<br>(-659 to 3750) | 0    | -224<br>(-1570 to 1210) | 0    | 832<br>(170 to 1670)  | 0    | 660<br>(57 to 1280)  | 0    |
|                                | <i>+industry response</i> | 2660<br>(490 to 5220)  | 0    | 234<br>(-1130 to 1770)  | 0    | 1200<br>(535 to 2040) | 0    | 902<br>(291 to 1570) | 0    |
| Non-Hispanic Black             | <i>consumer behavior</i>  | 567<br>(-110 to 1300)  | 0    | 182<br>(-34 to 431)     | 0    | 267<br>(89 to 487)    | 0    | 43<br>(-40 to 136)   | 0    |

|    |                            |                           |                      |                        |                      |                       |                      |                      |                    |                      |
|----|----------------------------|---------------------------|----------------------|------------------------|----------------------|-----------------------|----------------------|----------------------|--------------------|----------------------|
| 1  |                            | <i>+industry response</i> | 912<br>(240 to 1680) | 0                      | 271<br>(55 to 536)   | 0                     | 329<br>(149 to 554)  | 0                    | 71<br>(-13 to 166) | 0                    |
| 2  | Hispanic                   | <i>consumer behavior</i>  | 581<br>(44 to 1200)  | 0                      | 231<br>(-14 to 474)  | 0                     | 32.9<br>(-72 to 154) | 0                    | 42<br>(-12 to 100) | 0                    |
| 3  |                            |                           |                      |                        |                      |                       |                      |                      |                    |                      |
| 4  |                            | <i>+industry response</i> | 934<br>(368 to 1600) | 0                      | 312<br>(71 to 563)   | 0                     | 76<br>(-34 to 198)   | 0                    | 61<br>(6 to 123)   | 0                    |
| 5  | Other                      | <i>consumer behavior</i>  | 1<br>(-310 to 384)   | 0                      | 182<br>(40 to 353)   | 0                     | 74<br>(9 to 148)     | 0                    | -7<br>(-35 to 22)  | 0                    |
| 6  |                            |                           |                      |                        |                      |                       |                      |                      |                    |                      |
| 7  |                            | <i>+industry response</i> | 128<br>(-187 to 541) | 0                      | 210<br>(71 to 386)   | 0                     | 94<br>(29 to 170)    | 0                    | 1<br>(-27 to 31)   | 0                    |
| 8  |                            |                           |                      |                        |                      |                       |                      |                      |                    |                      |
| 9  |                            |                           |                      |                        |                      |                       |                      |                      |                    |                      |
| 10 |                            |                           |                      |                        |                      |                       |                      |                      |                    |                      |
| 11 | <b>Kidney (Renal Cell)</b> |                           |                      |                        |                      |                       |                      |                      |                    |                      |
| 12 |                            |                           |                      |                        |                      |                       |                      |                      |                    |                      |
| 13 | Age                        | <i>consumer behavior</i>  | 2930 (864 to 5040)   |                        | 581 (-364 to 1540)   |                       | 1180 (526 to 1810)   |                      | 428 (28 to 805)    |                      |
| 14 |                            | <i>+industry response</i> | 5240 (3110 to 7390)  |                        | 1230 (244 to 2210)   |                       | 1590 (941 to 2250)   |                      | 651 (248 to 1030)  |                      |
| 15 |                            |                           |                      |                        |                      |                       |                      |                      |                    |                      |
| 16 | Race/Ethnicity             |                           |                      |                        |                      |                       |                      |                      |                    |                      |
| 17 |                            | Non-                      |                      |                        |                      |                       |                      |                      |                    |                      |
| 18 | Hispanic White             | <i>consumer behavior</i>  | 338<br>(-137 to 844) | 1040<br>(-536 to 2790) | -42<br>(-332 to 273) | 53<br>(-791 to 884)   | 172<br>(34 to 339)   | 677<br>(88 to 1240)  | 147<br>(18 to 280) | 192<br>(-170 to 536) |
| 19 |                            | <i>+industry response</i> | 646<br>(173 to 1180) | 2020<br>(410 to 3750)  | 58<br>(-236 to 383)  | 379<br>(-452 to 1250) | 251<br>(109 to 420)  | 898<br>(326 to 1470) | 199<br>(72 to 335) | 320<br>(-35 to 661)  |
| 20 |                            | <i>consumer behavior</i>  | 170<br>(-35 to 384)  | 88<br>(-454 to 620)    | 60<br>(-5 to 128)    | 136<br>(-96 to 410)   | 79<br>(26 to 139)    | 85<br>(-81 to 258)   | 13<br>(-12 to 40)  | 44<br>(9 to 79)      |
| 21 | Non-Hispanic Black         | <i>+industry response</i> | 280<br>(69 to 502)   | 343<br>(-202 to 898)   | 87<br>(22 to 157)    | 203<br>(-30 to 475)   | 97<br>(43 to 157)    | 119<br>(-45 to 295)  | 21<br>(-4 to 48)   | 56<br>(22 to 90)     |
| 22 |                            | <i>consumer behavior</i>  | 267<br>(21 to 527)   | 895<br>(-21 to 1920)   | 92<br>(-4 to 184)    | 230<br>(-25 to 503)   | 14<br>(-27 to 60)    | 94<br>(8 to 196)     | 15<br>(-6 to 36)   | 9<br>(-29 to 50)     |
| 23 |                            | <i>+industry response</i> | 425<br>(166 to 697)  | 1290<br>(371 to 2320)  | 123<br>(27 to 218)   | 305<br>(49 to 570)    | 29<br>(-12 to 76)    | 127<br>(41 to 232)   | 22<br>(2 to 44)    | 21<br>(-17 to 63)    |
| 24 | Hispanic                   | <i>consumer behavior</i>  | 5<br>(-47 to 66)     | 75<br>(-103 to 274)    | 34<br>(12 to 59)     | 3<br>(-64 to 77)      | 13<br>(2 to 25)      | 33<br>(10 to 58)     | -1<br>(-6 to 4)    | 8<br>(-18 to 37)     |
| 25 |                            | <i>+industry response</i> | 27<br>(-26 to 89)    | 147<br>(-29 to 347)    | 38<br>(17 to 64)     | 17<br>(-52 to 91)     | 16<br>(5 to 28)      | 41<br>(19 to 67)     | 1<br>(-4 to 6)     | 11<br>(-15 to 40)    |
| 26 |                            | <i>consumer behavior</i>  |                      |                        |                      |                       |                      |                      |                    |                      |
| 27 | Other                      | <i>+industry response</i> |                      |                        |                      |                       |                      |                      |                    |                      |
| 28 |                            | <i>consumer behavior</i>  |                      |                        |                      |                       |                      |                      |                    |                      |
| 29 |                            |                           |                      |                        |                      |                       |                      |                      |                    |                      |
| 30 |                            |                           |                      |                        |                      |                       |                      |                      |                    |                      |
| 31 |                            |                           |                      |                        |                      |                       |                      |                      |                    |                      |
| 32 |                            |                           |                      |                        |                      |                       |                      |                      |                    |                      |
| 33 |                            |                           |                      |                        |                      |                       |                      |                      |                    |                      |
| 34 |                            |                           |                      |                        |                      |                       |                      |                      |                    |                      |
| 35 | <b>Liver</b>               |                           |                      |                        |                      |                       |                      |                      |                    |                      |
| 36 | Age                        | <i>consumer behavior</i>  | 3210 (1000 to 5540)  |                        | 701 (-200 to 1760)   |                       | 1000 (477 to 1580)   |                      | 275 (17 to 551)    |                      |
| 37 |                            | <i>+industry response</i> | 5560 (3130 to 8130)  |                        | 1340 (397 to 2480)   |                       | 1340 (804 to 1950)   |                      | 432 (174 to 719)   |                      |
| 38 |                            |                           |                      |                        |                      |                       |                      |                      |                    |                      |
| 39 | Race/Ethnicity             |                           |                      |                        |                      |                       |                      |                      |                    |                      |
| 40 |                            |                           |                      |                        |                      |                       |                      |                      |                    |                      |
| 41 |                            |                           |                      |                        |                      |                       |                      |                      |                    |                      |
| 42 |                            |                           |                      |                        |                      |                       |                      |                      |                    |                      |
| 43 |                            |                           |                      |                        |                      |                       |                      |                      |                    |                      |
| 44 |                            |                           |                      |                        |                      |                       |                      |                      |                    |                      |
| 45 |                            |                           |                      |                        |                      |                       |                      |                      |                    |                      |
| 46 |                            |                           |                      |                        |                      |                       |                      |                      |                    |                      |
| 47 |                            |                           |                      |                        |                      |                       |                      |                      |                    |                      |

|    |                    |                           |                    |                |                    |                |                  |               |                 |               |
|----|--------------------|---------------------------|--------------------|----------------|--------------------|----------------|------------------|---------------|-----------------|---------------|
| 1  | Non-Hispanic       | <i>consumer behavior</i>  | 170                | 1150           | 18                 | -82            | 113              | 520           | 75              | 116           |
| 2  | White              |                           | (-125 to 597)      | (-258 to 3130) | (-168 to 236)      | (-844 to 807)  | (36 to 227)      | (108 to 1020) | (6 to 155)      | (-110 to 365) |
| 3  |                    | <i>+industry response</i> | 367                | 2120           | 78                 | 215            | 159              | 668           | 100             | 198           |
| 4  |                    |                           | (53 to 855)        | (498 to 4300)  | (-105 to 319)      | (-537 to 1150) | (77 to 280)      | (287 to 1220) | (35 to 189)     | (-26 to 454)  |
| 5  | Non-Hispanic Black | <i>consumer behavior</i>  | 143                | 85             | 53                 | 213            | 51               | 118           | 7               | 37            |
| 6  |                    |                           | (-27 to 346)       | (-678 to 1050) | (2 to 120)         | (-146 to 705)  | (14 to 100)      | (-112 to 393) | (-7 to 26)      | (-4 to 88)    |
| 7  |                    | <i>+industry response</i> | 231                | 429            | 74                 | 306            | 63               | 163           | 12              | 52            |
| 8  |                    |                           | (53 to 458)        | (-312 to 1460) | (24 to 147)        | (-41 to 823)   | (28 to 115)      | (-58 to 447)  | (-2 to 32)      | (11 to 107)   |
| 9  | Hispanic           | <i>consumer behavior</i>  | 239                | 1150           | 99                 | 321            | 14               | 113           | 17              | 8             |
| 10 |                    |                           | (19 to 570)        | (93 to 2490)   | (3 to 215)         | (15 to 703)    | (-30 to 72)      | (19 to 233)   | (-5 to 41)      | (-33 to 54)   |
| 11 |                    | <i>+industry response</i> | 384                | 1600           | 132                | 409            | 31               | 150           | 25              | 20            |
| 12 |                    |                           | (132 to 756)       | (529 to 3050)  | (36 to 257)        | (106 to 820)   | (-13 to 90)      | (55 to 276)   | (3 to 50)       | (-19 to 70)   |
| 13 | Other              | <i>consumer behavior</i>  | 2                  | 99             | 38                 | -1             | 15               | 38            | 0               | 9             |
| 14 |                    |                           | (-56 to 82)        | (-125 to 379)  | (9 to 77)          | (-101 to 125)  | (0 to 34)        | (5 to 76)     | (-8 to 7)       | (-28 to 53)   |
| 15 |                    | <i>+industry response</i> | 26                 | 183            | 43                 | 18             | 19               | 48            | 2               | 14            |
| 16 |                    |                           | (-32 to 108)       | (-31 to 483)   | (15 to 85)         | (-80 to 152)   | (5 to 40)        | (17 to 91)    | (-5 to 10)      | (-23 to 59)   |
| 17 | <b>Pancreatic</b>  |                           |                    |                |                    |                |                  |               |                 |               |
| 18 | Age                | <i>consumer behavior</i>  | 764 (262 to 1340)  |                | 81.6 (-186 to 388) |                | 404 (193 to 651) |               | 148 (21 to 286) |               |
| 19 |                    | <i>+industry response</i> | 1350 (820 to 1990) |                | 269 (4 to 595)     |                | 540 (327 to 793) |               | 227 (96 to 370) |               |
| 20 | Race/Ethnicity     |                           |                    |                |                    |                |                  |               |                 |               |
| 21 | Non-Hispanic White | <i>consumer behavior</i>  | 121                | 247            | -48                | -16            | 87               | 218           | 63              | 58            |
| 22 |                    |                           | (-44 to 367)       | (-120 to 768)  | (-159 to 87)       | (-246 to 245)  | (26 to 175)      | (48 to 432)   | (3 to 131)      | (-54 to 189)  |
| 23 |                    | <i>+industry response</i> | 229                | 490            | -11                | 73             | 122              | 283           | 87              | 98            |
| 24 |                    |                           | (50 to 493)        | (99 to 1060)   | (-124 to 134)      | (-154 to 363)  | (56 to 218)      | (115 to 507)  | (27 to 163)     | (-12 to 238)  |
| 25 | Non-Hispanic Black | <i>consumer behavior</i>  | 60                 | 18             | 24                 | 30             | 32               | 19            | 5               | 10            |
| 26 |                    |                           | (-10 to 158)       | (-80 to 128)   | (-1 to 54)         | (-20 to 87)    | (9 to 63)        | (-16 to 62)   | (-6 to 19)      | (2 to 19)     |
| 27 |                    | <i>+industry response</i> | 98                 | 64             | 34                 | 44             | 39               | 27            | 9               | 13            |
| 28 |                    |                           | (21 to 207)        | (-36 to 184)   | (9 to 67)          | (-4 to 102)    | (17 to 72)       | (-9 to 70)    | (-2 to 23)      | (5 to 23)     |
| 29 | Hispanic           | <i>consumer behavior</i>  | 68                 | 194            | 26                 | 46             | 4                | 18            | 6               | 2             |
| 30 |                    |                           | (5 to 150)         | (13 to 422)    | (-4 to 60)         | (-5 to 105)    | (-11 to 22)      | (-3 to 44)    | (-2 to 14)      | (-8 to 12)    |
| 31 |                    | <i>+industry response</i> | 108                | 273            | 36                 | 63             | 10               | 26            | 8               | 5             |
| 32 |                    |                           | (40 to 201)        | (92 to 518)    | (7 to 70)          | (11 to 124)    | (-5 to 28)       | (6 to 53)     | (0 to 18)       | (-5 to 15)    |
| 33 | Other              | <i>consumer behavior</i>  | -2                 | 18             | 17                 | 0              | 8                | 10            | 0               | 2             |
| 34 |                    |                           | (-27 to 30)        | (-29 to 72)    | (4 to 33)          | (-20 to 23)    | (1 to 16)        | (3 to 19)     | (-4 to 3)       | (-6 to 13)    |
| 35 |                    | <i>+industry response</i> | 9                  | 36             | 19                 | 4              | 10               | 13            | 1               | 4             |
| 36 |                    |                           | (-17 to 43)        | (-9 to 94)     | (7 to 36)          | (-16 to 28)    | (3 to 18)        | (5 to 22)     | (-3 to 5)       | (-5 to 14)    |
| 37 |                    |                           |                    |                |                    |                |                  |               |                 |               |
| 38 |                    |                           |                    |                |                    |                |                  |               |                 |               |
| 39 |                    |                           |                    |                |                    |                |                  |               |                 |               |
| 40 |                    |                           |                    |                |                    |                |                  |               |                 |               |
| 41 |                    |                           |                    |                |                    |                |                  |               |                 |               |
| 42 |                    |                           |                    |                |                    |                |                  |               |                 |               |
| 43 |                    |                           |                    |                |                    |                |                  |               |                 |               |
| 44 |                    |                           |                    |                |                    |                |                  |               |                 |               |
| 45 |                    |                           |                    |                |                    |                |                  |               |                 |               |
| 46 |                    |                           |                    |                |                    |                |                  |               |                 |               |
| 47 |                    |                           |                    |                |                    |                |                  |               |                 |               |

| <b>Esophageal Adenocarcinoma</b> |                    |                           |  |                    |                    |                  |                   |                  |                  |                 |                  |
|----------------------------------|--------------------|---------------------------|--|--------------------|--------------------|------------------|-------------------|------------------|------------------|-----------------|------------------|
| 3                                | Age                | <i>consumer behavior</i>  |  | 715 (43 to 1480)   | 92 (-296 to 501)   | 419 (136 to 719) | 128 (-60 to 309)  |                  |                  |                 |                  |
| 5                                |                    | <i>+industry response</i> |  | 1300 (602 to 2100) | 293 (-102 to 708)  | 556 (270 to 858) | 206 (20 to 390)   |                  |                  |                 |                  |
| 7                                | Race/Ethnicity     |                           |  |                    |                    |                  |                   |                  |                  |                 |                  |
| 8                                | Non-Hispanic White | <i>consumer behavior</i>  |  | 45 (-25 to 125)    | 406 (-228 to 1100) | -9 (-55 to 41)   | 26 (-368 to 419)  | 30 (7 to 58)     | 345 (64 to 630)  | 27 (5 to 50)    | 92 (-88 to 263)  |
| 10                               |                    | <i>+industry response</i> |  | 91 (17 to 179)     | 815 (174 to 1560)  | 7 (-40 to 60)    | 179 (-210 to 578) | 43 (20 to 73)    | 449 (174 to 739) | 35 (14 to 59)   | 155 (-17 to 330) |
| 11                               | Non-Hispanic Black | <i>consumer behavior</i>  |  | 10 (-2 to 22)      | 10 (-28 to 50)     | 3 (-1 to 8)      | 11 (-7 to 32)     | 5 (2 to 9)       | 67 (-7 to 22)    | 1 (-1 to 3)     | 4 (0 to 7)       |
| 13                               |                    | <i>+industry response</i> |  | 16 (4 to 29)       | 28 (-11 to 69)     | 5 (1 to 9)       | 16 (-2 to 37)     | 6 (3 to 11)      | 9 (-4 to 25)     | 1 (0 to 3)      | 5 (2 to 8)       |
| 14                               | Hispanic           | <i>consumer behavior</i>  |  | 28 (2 to 57)       | 196 (-2 to 414)    | 9 (-1 to 20)     | 46 (-7 to 112)    | 2 (-3 to 8)      | 24 (3 to 47)     | 2 (-1 to 4)     | 2 (-7 to 12)     |
| 16                               |                    | <i>+industry response</i> |  | 44 (17 to 76)      | 280 (80 to 504)    | 13 (2 to 24)     | 63 (7 to 130)     | 3 (-1 to 10)     | 32 (11 to 56)    | 3 (0 to 5)      | 4 (-4 to 15)     |
| 17                               | Other              | <i>consumer behavior</i>  |  | -1 (-10 to 11)     | 10 (-16 to 41)     | 6 (1 to 11)      | 0 (-12 to 13)     | 2 (0 to 5)       | 7 (2 to 12)      | 0 (-1 to 1)     | 2 (-4 to 8)      |
| 19                               |                    | <i>+industry response</i> |  | 3 (-6 to 15)       | 21 (-6 to 52)      | 75 (2 to 12)     | 2 (-10 to 15)     | 3 (1 to 6)       | 8 (4 to 13)      | 0 (-1 to 1)     | 2 (-3 to 9)      |
| 20                               |                    |                           |  |                    |                    |                  |                   |                  |                  |                 |                  |
| 25                               | <b>Colorectal</b>  |                           |  |                    |                    |                  |                   |                  |                  |                 |                  |
| 26                               | Age                | <i>consumer behavior</i>  |  | 584 (183 to 1090)  |                    | 79 (-90 to 289)  |                   | 251 (126 to 412) |                  | 117 (19 to 224) |                  |
| 27                               |                    | <i>+industry response</i> |  | 1050 (605 to 1610) |                    | 201 (23 to 426)  |                   | 341 (209 to 514) |                  | 175 (81 to 289) |                  |
| 28                               | Race/Ethnicity     |                           |  |                    |                    |                  |                   |                  |                  |                 |                  |
| 29                               | Non-Hispanic White | <i>consumer behavior</i>  |  | 67 (-51 to 261)    | 169 (-107 to 569)  | -35 (-106 to 64) | -17 (-151 to 163) | 52 (11 to 111)   | 126 (21 to 262)  | 55 (11 to 115)  | 44 (-36 to 129)  |
| 31                               |                    | <i>+industry response</i> |  | 144 (-2 to 382)    | 358 (40 to 790)    | -12 (-80 to 97)  | 38 (-99 to 233)   | 75 (30 to 146)   | 168 (62 to 313)  | 73 (28 to 138)  | 70 (-7 to 162)   |
| 32                               | Non-Hispanic Black | <i>consumer behavior</i>  |  | 31 (-9 to 88)      | 38 (-48 to 144)    | 11 (-1 to 29)    | 26 (-13 to 79)    | 19 (7 to 36)     | 14 (-17 to 49)   | 3 (-4 to 12)    | 8 (1 to 17)      |
| 33                               |                    | <i>+industry response</i> |  | 53 (9 to 119)      | 78 (-8 to 203)     | 17 (4 to 36)     | 36 (-2 to 91)     | 23 (11 to 41)    | 20 (-9 to 56)    | 6 (-1 to 15)    | 11 (3 to 21)     |
| 34                               | Hispanic           | <i>consumer behavior</i>  |  | 45 (2 to 113)      | 185 (25 to 409)    | 20 (1 to 43)     | 57 (9 to 114)     | 3 (-7 to 16)     | 21 (2 to 44)     | 4 (-1 to 11)    | 1 (-8 to 11)     |
| 35                               |                    |                           |  |                    |                    |                  |                   |                  |                  |                 |                  |
| 36                               |                    |                           |  |                    |                    |                  |                   |                  |                  |                 |                  |
| 37                               |                    |                           |  |                    |                    |                  |                   |                  |                  |                 |                  |
| 38                               |                    |                           |  |                    |                    |                  |                   |                  |                  |                 |                  |
| 39                               |                    |                           |  |                    |                    |                  |                   |                  |                  |                 |                  |
| 40                               |                    |                           |  |                    |                    |                  |                   |                  |                  |                 |                  |
| 41                               |                    |                           |  |                    |                    |                  |                   |                  |                  |                 |                  |
| 42                               |                    |                           |  |                    |                    |                  |                   |                  |                  |                 |                  |
| 43                               |                    |                           |  |                    |                    |                  |                   |                  |                  |                 |                  |
| 44                               |                    |                           |  |                    |                    |                  |                   |                  |                  |                 |                  |
| 45                               |                    |                           |  |                    |                    |                  |                   |                  |                  |                 |                  |
| 46                               |                    |                           |  |                    |                    |                  |                   |                  |                  |                 |                  |
| 47                               |                    |                           |  |                    |                    |                  |                   |                  |                  |                 |                  |

|    |                         |                           |                     |                     |                    |                    |                  |                    |                 |                   |  |
|----|-------------------------|---------------------------|---------------------|---------------------|--------------------|--------------------|------------------|--------------------|-----------------|-------------------|--|
| 1  |                         | <i>+industry response</i> | 73<br>(18 to 155)   | 256<br>(84 to 504)  | 26<br>(8 to 51)    | 70<br>(23 to 129)  | 6<br>(-3 to 20)  | 28<br>(10 to 53)   | 6<br>(1 to 13)  | 4<br>(-5 to 14)   |  |
| 2  | Other                   | <i>consumer behavior</i>  | -2<br>(-21 to 26)   | 20<br>(-31 to 89)   | 7<br>(-1 to 19)    | 1<br>(-20 to 26)   | 4<br>(0 to 11)   | 8<br>(1 to 16)     | -1<br>(-3 to 2) | 3<br>(-6 to 13)   |  |
| 3  |                         | <i>+industry response</i> | 6<br>(-13 to 36)    | 41<br>(-9 to 115)   | 9<br>(1 to 21)     | 5<br>(-15 to 31)   | 6<br>(1 to 12)   | 10<br>(4 to 19)    | 0<br>(-2 to 3)  | 4<br>(-5 to 14)   |  |
| 4  |                         |                           |                     |                     |                    |                    |                  |                    |                 |                   |  |
| 5  |                         |                           |                     |                     |                    |                    |                  |                    |                 |                   |  |
| 6  |                         |                           |                     |                     |                    |                    |                  |                    |                 |                   |  |
| 7  | <b>Thyroid</b>          |                           |                     |                     |                    |                    |                  |                    |                 |                   |  |
| 8  | Age                     | <i>consumer behavior</i>  | 374 (114 to 751)    |                     | 10 (-69 to 125)    |                    | 84 (44 to 144)   |                    | 34 (7 to 68)    |                   |  |
| 9  |                         | <i>+industry response</i> | 683 (349 to 1130)   |                     | 67 (-17 to 200)    |                    | 117 (70 to 187)  |                    | 52 (22 to 91)   |                   |  |
| 10 |                         |                           |                     |                     |                    |                    |                  |                    |                 |                   |  |
| 11 | <b>Race/Ethnicity</b>   |                           |                     |                     |                    |                    |                  |                    |                 |                   |  |
| 12 | Non-Hispanic White      | <i>consumer behavior</i>  | 96<br>(-59 to 382)  | 52<br>(-59 to 273)  | -28<br>(-85 to 56) | -15<br>(-64 to 58) | 21<br>(1 to 62)  | 28<br>(1 to 73)    | 20<br>(2 to 47) | 8<br>(-9 to 31)   |  |
| 13 |                         | <i>+industry response</i> | 205<br>(-15 to 563) | 131<br>(-26 to 395) | -8<br>(-63 to 92)  | 3<br>(-43 to 85)   | 33<br>(5 to 80)  | 40<br>(12 to 90)   | 28<br>(9 to 58) | 14<br>(-3 to 40)  |  |
| 14 | Non-Hispanic Black      | <i>consumer behavior</i>  | 29<br>(-10 to 113)  | 7<br>(-10 to 36)    | 8<br>(-1 to 24)    | 3<br>(-3 to 12)    | 12<br>(6 to 22)  | 2<br>(-2 to 8)     | 1<br>(-2 to 5)  | 1<br>(0 to 2)     |  |
| 15 |                         | <i>+industry response</i> | 52<br>(-1 to 153)   | 16<br>(-4 to 50)    | 12<br>(2 to 30)    | 5<br>(-1 to 15)    | 14<br>(8 to 26)  | 3<br>(-1 to 10)    | 2<br>(0 to 7)   | 2<br>(1 to 3)     |  |
| 16 | Hispanic                | <i>consumer behavior</i>  | 68<br>(1 to 201)    | 59<br>(6 to 151)    | 15<br>(-5 to 39)   | 13<br>(2 to 30)    | 2<br>(-4 to 12)  | 4<br>(0 to 9)      | 2<br>(-1 to 6)  | 0<br>(-1 to 3)    |  |
| 17 |                         | <i>+industry response</i> | 113<br>(22 to 276)  | 84<br>(26 to 189)   | 21<br>(2 to 48)    | 16<br>(6 to 35)    | 4<br>(-2 to 15)  | 5<br>(2 to 12)     | 3<br>(0 to 8)   | 1<br>(-1 to 3)    |  |
| 18 | Other                   | <i>consumer behavior</i>  | -4<br>(-38 to 59)   | 13<br>(-13 to 56)   | 6<br>(-4 to 20)    | 1<br>(-7 to 12)    | 5<br>(2 to 10)   | 5<br>(3 to 8)      | -1<br>(-2 to 1) | 0<br>(-2 to 3)    |  |
| 19 |                         | <i>+industry response</i> | 12<br>(-25 to 82)   | 23<br>(-2 to 70)    | 8<br>(-1 to 23)    | 3<br>(-5 to 14)    | 6<br>(3 to 11)   | 6<br>(4 to 9)      | 0<br>(-2 to 2)  | 1<br>(-1 to 4)    |  |
| 20 |                         |                           |                     |                     |                    |                    |                  |                    |                 |                   |  |
| 21 |                         |                           |                     |                     |                    |                    |                  |                    |                 |                   |  |
| 22 |                         |                           |                     |                     |                    |                    |                  |                    |                 |                   |  |
| 23 |                         |                           |                     |                     |                    |                    |                  |                    |                 |                   |  |
| 24 |                         |                           |                     |                     |                    |                    |                  |                    |                 |                   |  |
| 25 |                         |                           |                     |                     |                    |                    |                  |                    |                 |                   |  |
| 26 |                         |                           |                     |                     |                    |                    |                  |                    |                 |                   |  |
| 27 |                         |                           |                     |                     |                    |                    |                  |                    |                 |                   |  |
| 28 |                         |                           |                     |                     |                    |                    |                  |                    |                 |                   |  |
| 29 |                         |                           |                     |                     |                    |                    |                  |                    |                 |                   |  |
| 30 | <b>Multiple Myeloma</b> |                           |                     |                     |                    |                    |                  |                    |                 |                   |  |
| 31 | Age                     | <i>consumer behavior</i>  | 370 (113 to 743)    |                     | 78 (-46 to 242)    |                    | 181 (85 to 308)  |                    | 63 (7 to 128)   |                   |  |
| 32 |                         | <i>+industry response</i> | 653 (327 to 1120)   |                     | 164 (29 to 357)    |                    | 243 (142 to 385) |                    | 97 (41 to 169)  |                   |  |
| 33 |                         |                           |                     |                     |                    |                    |                  |                    |                 |                   |  |
| 34 |                         |                           |                     |                     |                    |                    |                  |                    |                 |                   |  |
| 35 | <b>Race/Ethnicity</b>   |                           |                     |                     |                    |                    |                  |                    |                 |                   |  |
| 36 | Non-Hispanic White      | <i>consumer behavior</i>  | 27<br>(-34 to 138)  | 102<br>(-61 to 375) | -14<br>(-50 to 50) | -4<br>(-96 to 139) | 24<br>(3 to 67)  | 96<br>(25 to 204)  | 20<br>(1 to 52) | 23<br>(-23 to 83) |  |
| 37 |                         | <i>+industry response</i> | 64<br>(-22 to 204)  | 207<br>(0 to 544)   | -1<br>(-38 to 74)  | 29<br>(-60 to 199) | 36<br>(9 to 87)  | 125<br>(52 to 246) | 28<br>(8 to 65) | 39<br>(-5 to 111) |  |
| 38 |                         |                           |                     |                     |                    |                    |                  |                    |                 |                   |  |
| 39 |                         |                           |                     |                     |                    |                    |                  |                    |                 |                   |  |
| 40 |                         |                           |                     |                     |                    |                    |                  |                    |                 |                   |  |
| 41 |                         |                           |                     |                     |                    |                    |                  |                    |                 |                   |  |
| 42 |                         |                           |                     |                     |                    |                    |                  |                    |                 |                   |  |
| 43 |                         |                           |                     |                     |                    |                    |                  |                    |                 |                   |  |
| 44 |                         |                           |                     |                     |                    |                    |                  |                    |                 |                   |  |
| 45 |                         |                           |                     |                     |                    |                    |                  |                    |                 |                   |  |
| 46 |                         |                           |                     |                     |                    |                    |                  |                    |                 |                   |  |
| 47 |                         |                           |                     |                     |                    |                    |                  |                    |                 |                   |  |

|    |                                 |                           |                   |                     |                   |                     |                  |                    |                 |                    |
|----|---------------------------------|---------------------------|-------------------|---------------------|-------------------|---------------------|------------------|--------------------|-----------------|--------------------|
| 1  | Non-Hispanic Black              | <i>consumer behavior</i>  | 39<br>(-9 to 135) | 22<br>(-63 to 178)  | 14<br>(-1 to 43)  | 27<br>(-15 to 95)   | 19<br>(4 to 45)  | 11<br>(-22 to 60)  | 4<br>(-4 to 17) | 10<br>(2 to 22)    |
| 2  |                                 | <i>+industry response</i> | 66<br>(1 to 183)  | 65<br>(-30 to 242)  | 22<br>(4 to 55)   | 38<br>(-3 to 113)   | 24<br>(9 to 54)  | 18<br>(-13 to 71)  | 6<br>(-1 to 20) | 13<br>(5 to 26)    |
| 3  | Hispanic                        | <i>consumer behavior</i>  | 26<br>(0 to 79)   | 111<br>(12 to 277)  | 7<br>(-5 to 24)   | 25<br>(-3 to 68)    | 2<br>(-4 to 11)  | 15<br>(3 to 32)    | 2<br>(-1 to 7)  | 0<br>(-5 to 7)     |
| 4  |                                 | <i>+industry response</i> | 43<br>(6 to 110)  | 154<br>(50 to 340)  | 10<br>(0 to 30)   | 33<br>(6 to 82)     | 4<br>(-2 to 15)  | 19<br>(8 to 39)    | 3<br>(0 to 9)   | 1<br>(-3 to 9)     |
| 5  | Other                           | <i>consumer behavior</i>  | 0<br>(-7 to 11)   | 8<br>(-11 to 41)    | 7<br>(3 to 12)    | 0<br>(-10 to 12)    | 1<br>(1 to 4)    | 4<br>(1 to 9)      | -0<br>(-1 to 1) | 1<br>(-3 to 6)     |
| 6  |                                 | <i>+industry response</i> | 2<br>(-4 to 16)   | 16<br>(-3 to 53)    | 8<br>(4 to 13)    | 1<br>(-8 to 15)     | 2<br>(0 to 5)    | 5<br>(2 to 11)     | 0<br>(-1 to 1)  | 1<br>(-2 to 6)     |
| 7  |                                 |                           |                   |                     |                   |                     |                  |                    |                 |                    |
| 8  |                                 |                           |                   |                     |                   |                     |                  |                    |                 |                    |
| 9  |                                 |                           |                   |                     |                   |                     |                  |                    |                 |                    |
| 10 |                                 |                           |                   |                     |                   |                     |                  |                    |                 |                    |
| 11 |                                 |                           |                   |                     |                   |                     |                  |                    |                 |                    |
| 12 |                                 |                           |                   |                     |                   |                     |                  |                    |                 |                    |
| 13 | <b>Stomach (Gastric Cardia)</b> |                           |                   |                     |                   |                     |                  |                    |                 |                    |
| 14 |                                 |                           |                   |                     |                   |                     |                  |                    |                 |                    |
| 15 |                                 |                           |                   |                     |                   |                     |                  |                    |                 |                    |
| 16 | Age                             | <i>consumer behavior</i>  | 338 (49 to 803)   |                     | 58 (-99 to 264)   |                     | 182 (70 to 347)  |                    | 54 (-19 to 149) |                    |
| 17 |                                 | <i>+industry response</i> | 607 (241 to 1140) |                     | 141 (-20 to 378)  |                     | 240 (129 to 420) |                    | 86 (15 to 190)  |                    |
| 18 |                                 |                           |                   |                     |                   |                     |                  |                    |                 |                    |
| 19 | Race/Ethnicity                  |                           |                   |                     |                   |                     |                  |                    |                 |                    |
| 20 | Non-Hispanic White              | <i>consumer behavior</i>  | 18<br>(-19 to 77) | 208<br>(-55 to 648) | -9<br>(-31 to 25) | 24<br>(-128 to 233) | 15<br>(4 to 37)  | 145<br>(35 to 304) | 14<br>(3 to 28) | 34<br>(-36 to 124) |
| 21 |                                 | <i>+industry response</i> | 43<br>(-6 to 117) | 380<br>(51 to 886)  | -1<br>(-24 to 38) | 86<br>(-67 to 322)  | 22<br>(9 to 47)  | 187<br>(77 to 364) | 18<br>(8 to 35) | 58<br>(-9 to 160)  |
| 22 | Non-Hispanic Black              | <i>consumer behavior</i>  | 7<br>(-2 to 21)   | 6<br>(-19 to 44)    | 2<br>(0 to 6)     | 7<br>(-5 to 24)     | 3<br>(1 to 7)    | 3<br>(-6 to 15)    | 0<br>(0 to 2)   | 3<br>(1 to 5)      |
| 23 |                                 | <i>+industry response</i> | 12<br>(2 to 28)   | 19<br>(-8 to 62)    | 3<br>(1 to 7)     | 10<br>(-2 to 29)    | 4<br>(2 to 8)    | 5<br>(-4 to 17)    | 1<br>(0 to 2)   | 3<br>(2 to 6)      |
| 24 | Hispanic                        | <i>consumer behavior</i>  | 15<br>(1 to 39)   | 63<br>(-7 to 170)   | 5<br>(0 to 13)    | 16<br>(-4 to 45)    | 1<br>(-2 to 5)   | 7<br>(0 to 18)     | 1<br>(0 to 3)   | 1<br>(-3 to 5)     |
| 25 |                                 | <i>+industry response</i> | 24<br>(6 to 52)   | 95<br>(21 to 214)   | 7<br>(2 to 16)    | 22<br>(3 to 54)     | 2<br>(-1 to 6)   | 10<br>(3 to 23)    | 1<br>(0 to 3)   | 2<br>(-2 to 7)     |
| 26 | Other                           | <i>consumer behavior</i>  | -1<br>(-7 to 10)  | 5<br>(-14 to 34)    | 5<br>(2 to 9)     | 0<br>(-8 to 12)     | 1<br>(0 to 3)    | 4<br>(1 to 9)      | 0<br>(-1 to 1)  | 1<br>(-3 to 6)     |
| 27 |                                 | <i>+industry response</i> | 2<br>(-5 to 14)   | 12<br>(-7 to 46)    | 6<br>(3 to 10)    | 2<br>(-6 to 15)     | 2<br>(0 to 4)    | 5<br>(2 to 10)     | 0<br>(-1 to 1)  | 2<br>(-2 to 7)     |
| 28 |                                 |                           |                   |                     |                   |                     |                  |                    |                 |                    |
| 29 |                                 |                           |                   |                     |                   |                     |                  |                    |                 |                    |
| 30 |                                 |                           |                   |                     |                   |                     |                  |                    |                 |                    |
| 31 |                                 |                           |                   |                     |                   |                     |                  |                    |                 |                    |
| 32 |                                 |                           |                   |                     |                   |                     |                  |                    |                 |                    |
| 33 |                                 |                           |                   |                     |                   |                     |                  |                    |                 |                    |
| 34 |                                 |                           |                   |                     |                   |                     |                  |                    |                 |                    |
| 35 |                                 |                           |                   |                     |                   |                     |                  |                    |                 |                    |
| 36 |                                 |                           |                   |                     |                   |                     |                  |                    |                 |                    |
| 37 |                                 |                           |                   |                     |                   |                     |                  |                    |                 |                    |
| 38 | <b>Gallbladder</b>              |                           |                   |                     |                   |                     |                  |                    |                 |                    |
| 39 | Age                             | <i>consumer behavior</i>  | 161 (67 to 263)   |                     | 51 (8 to 100)     |                     | 76 (47 to 109)   |                    | 29 (11 to 51)   |                    |
| 40 |                                 | <i>+industry response</i> | 282 (181 to 396)  |                     | 86 (43 to 138)    |                     | 101 (73 to 137)  |                    | 44 (25 to 66)   |                    |
| 41 |                                 |                           |                   |                     |                   |                     |                  |                    |                 |                    |
| 42 |                                 |                           |                   |                     |                   |                     |                  |                    |                 |                    |
| 43 |                                 |                           |                   |                     |                   |                     |                  |                    |                 |                    |
| 44 |                                 |                           |                   |                     |                   |                     |                  |                    |                 |                    |
| 45 |                                 |                           |                   |                     |                   |                     |                  |                    |                 |                    |
| 46 |                                 |                           |                   |                     |                   |                     |                  |                    |                 |                    |
| 47 |                                 |                           |                   |                     |                   |                     |                  |                    |                 |                    |

|    |                 |                  |                  |              |                 |              |                 |             |                |             |
|----|-----------------|------------------|------------------|--------------|-----------------|--------------|-----------------|-------------|----------------|-------------|
| 1  | Race/Ethnicity  |                  |                  |              |                 |              |                 |             |                |             |
| 2  | Non-            | <i>consumer</i>  | 24               | 19           | 0               | 1.97         | 19              | 23          | 16             | 6           |
| 3  | Hispanic        | <i>behavior</i>  | (-10 to 71)      | (-13 to 61)  | (-25 to 30)     | (-17 to 24)  | (5 to 38)       | (6 to 42)   | (3 to 31)      | (-5 to 17)  |
| 4  | White           | <i>+industry</i> | 47               | 39           | 9               | 9            | 27              | 29          | 21             | 9           |
| 5  |                 | <i>response</i>  | (10 to 99)       | (5 to 88)    | (-16 to 42)     | (-10 to 34)  | (12 to 48)      | (13 to 50)  | (8 to 37)      | (-1 to 21)  |
| 6  | Non-            | <i>consumer</i>  | 27               | 2            | 11              | 6            | 14              | 4           | 2              | 2           |
| 7  | Hispanic Black  | <i>behavior</i>  | (-6 to 70)       | (-17 to 26)  | (0 to 24)       | (-4 to 18)   | (4 to 26)       | (-4 to 12)  | (-2 to 7)      | (0 to 4)    |
| 8  |                 | <i>+industry</i> | 45               | 11           | 15              | 9            | 17              | 5           | 4              | 3           |
| 9  |                 | <i>response</i>  | (11 to 93)       | (-8 to 38)   | (4 to 29)       | (-1 to 21)   | (8 to 30)       | (-2 to 14)  | (-1 to 9)      | (1 to 5)    |
| 10 | Hispanic        | <i>consumer</i>  | 32               | 42           | 10              | 14           | 3               | 7           | 3              | 0           |
| 11 |                 | <i>behavior</i>  | (2 to 73)        | (-10 to 106) | (-4 to 26)      | (-2 to 34)   | (-5 to 11)      | (1 to 15)   | (-1 to 7)      | (-3 to 4)   |
| 12 |                 | <i>+industry</i> | 53               | 65           | 15              | 19           | 5               | 9           | 4              | 1           |
| 13 |                 | <i>response</i>  | (19 to 96)       | (11 to 130)  | (1 to 31)       | (3 to 39)    | (-2 to 14)      | (3 to 18)   | (1 to 9)       | (-2 to 5)   |
| 14 | Other           | <i>consumer</i>  | 0                | 3            | 6               | 0            | 3               | 3           | 0              | 1           |
| 15 |                 | <i>behavior</i>  | (-11 to 18)      | (-6 to 15)   | (1 to 13)       | (-4 to 5)    | (0 to 7)        | (1 to 5)    | (-1 to 1)      | (-1 to 3)   |
| 16 |                 | <i>+industry</i> | 5                | 7            | 7               | 1            | 4               | 3           | 0              | 1           |
| 17 |                 | <i>response</i>  | (-7 to 24)       | (-2 to 19)   | (2 to 14)       | (-3 to 6)    | (1 to 8)        | (1 to 5)    | (-1 to 2)      | (-1 to 3)   |
| 18 | <b>Advanced</b> |                  |                  |              |                 |              |                 |             |                |             |
| 19 | <b>Prostate</b> |                  |                  |              |                 |              |                 |             |                |             |
| 20 |                 | <i>consumer</i>  |                  |              |                 |              |                 |             |                |             |
| 21 | Age             | <i>behavior</i>  | 163 (9 to 360)   |              | 37 (-54 to 146) |              | 106 (33 to 194) |             | 35 (-14 to 91) |             |
| 22 |                 | <i>+industry</i> |                  |              |                 |              |                 |             |                |             |
| 23 |                 | <i>response</i>  | 300 (130 to 507) |              | 85 (-6 to 203)  |              | 142 (67 to 240) |             | 56 (9 to 119)  |             |
| 24 | Race/Ethnicity  |                  |                  |              |                 |              |                 |             |                |             |
| 25 | Non-            | <i>consumer</i>  |                  | 86           |                 | -1           |                 | 75          |                | 24          |
| 26 | Hispanic        | <i>behavior</i>  | 0                | (-24 to 267) | 0               | (-80 to 98)  | 0               | (9 to 162)  | 0              | (-23 to 80) |
| 27 | White           | <i>+industry</i> | 0                | 162          | 0               | 30           | 0               | 100         | 0              | 40          |
| 28 |                 | <i>response</i>  |                  | (32 to 350)  |                 | (-48 to 144) |                 | (36 to 199) |                | (-5 to 102) |
| 29 | Non-            | <i>consumer</i>  | 0                | 3            | 0               | 21           | 0               | 16          | 0              | 8           |
| 30 | Hispanic Black  | <i>behavior</i>  | 0                | (-61 to 97)  | 0               | (-17 to 69)  | 0               | (-13 to 51) | 0              | (2 to 17)   |
| 31 |                 | <i>+industry</i> | 0                | 34           | 0               | 31           | 0               | 22          | 0              | 11          |
| 32 |                 | <i>response</i>  |                  | (-33 to 145) |                 | (-5 to 83)   |                 | (-7 to 57)  |                | (4 to 20)   |
| 33 | Hispanic        | <i>consumer</i>  | 0                | 59           | 0               | 13           | 0               | 9           | 0              | 1           |
| 34 |                 | <i>behavior</i>  | 0                | (8 to 133)   | 0               | (-3 to 37)   | 0               | (2 to 20)   | 0              | (-3 to 5)   |
| 35 |                 | <i>+industry</i> | 0                | 82           | 0               | 18           | 0               | 12          | 0              | 2           |
| 36 |                 | <i>response</i>  |                  | (28 to 163)  |                 | (1 to 44)    |                 | (5 to 23)   |                | (-2 to 7)   |
| 37 | Other           | <i>consumer</i>  | 0                | 3            | 0               | 0            | 0               | 4           | 0              | 1           |
| 38 |                 | <i>behavior</i>  | 0                | (-10 to 21)  | 0               | (-7 to 8)    | 0               | (2 to 8)    | 0              | (-3 to 5)   |
| 39 |                 | <i>+industry</i> | 0                | 8            | 0               | 1            | 0               | 5           | 0              | 2           |
| 40 |                 | <i>response</i>  |                  | (-5 to 28)   |                 | (-5 to 9)    |                 | (3 to 9)    |                | (-2 to 6)   |



| <b>Ovarian</b> |                    |                           |                 |   |                |   |               |   |               |
|----------------|--------------------|---------------------------|-----------------|---|----------------|---|---------------|---|---------------|
| 1              | Age                | <i>consumer behavior</i>  | 66 (-10 to 180) |   | 16 (-20 to 75) |   | 31 (11 to 69) |   | 28 (11 to 61) |
| 2              |                    | <i>+industry response</i> | 129 (16 to 277) |   | 33 (-6 to 102) |   | 45 (17 to 87) |   | 37 (19 to 75) |
| 3              | Race/Ethnicity     |                           |                 |   |                |   |               |   |               |
| 4              | Non-Hispanic White | <i>consumer behavior</i>  | 34 (-25 to 147) | 0 | -4 (-38 to 54) | 0 | 20 (2 to 55)  | 0 | 25 (8 to 57)  |
| 5              |                    | <i>+industry response</i> | 71 (-23 to 220) | 0 | 7 (-30 to 72)  | 0 | 30 (6 to 71)  | 0 | 32 (15 to 70) |
| 6              | Non-Hispanic Black | <i>consumer behavior</i>  | 11 (-5 to 41)   | 0 | 4 (0 to 13)    | 0 | 6 (3 to 13)   | 0 | 1 (-1 to 5)   |
| 7              |                    | <i>+industry response</i> | 19 (-3 to 56)   | 0 | 6 (0 to 17)    | 0 | 8 (4 to 16)   | 0 | 2 (0 to 6)    |
| 8              | Hispanic           | <i>consumer behavior</i>  | 21 (-2 to 67)   | 0 | 8 (-1 to 21)   | 0 | 1 (-3 to 8)   | 0 | 1 (-1 to 5)   |
| 9              |                    | <i>+industry response</i> | 34 (1 to 91)    | 0 | 11 (3 to 26)   | 0 | 3 (-1 to 10)  | 0 | 2 (0 to 6)    |
| 10             | Other              | <i>consumer behavior</i>  | -8 (-19 to 13)  | 0 | 6 (2 to 13)    | 0 | 2 (1 to 5)    | 0 | 0 (-1 to 1)   |
| 11             |                    | <i>+industry response</i> | -3 (-15 to 21)  | 0 | 7 (3 to 14)    | 0 | 3 (1 to 6)    | 0 | 0 (-1 to 2)   |

1. Values are the median estimates (95% uncertainty intervals) of each distribution of 1000 simulations.

For peer review only

**Supplementary Table 11.** Estimated cancer deaths reduced by the federal menu calorie labeling in the US by age, sex, race/ethnicity, and cancer type, over a lifetime (U.S. population=235,162,844)<sup>1</sup>

| Cancer Type                    | Policy Scenario           | 20-44 y                |                        | 45-54 y              |                       | 55-64 y             |                      | 65 + y             |                     |  |
|--------------------------------|---------------------------|------------------------|------------------------|----------------------|-----------------------|---------------------|----------------------|--------------------|---------------------|--|
|                                |                           | Female                 | Male                   | Female               | Male                  | Female              | Male                 | Female             | Male                |  |
| <b>Breast (Postmenopausal)</b> |                           |                        |                        |                      |                       |                     |                      |                    |                     |  |
| Age                            | <i>consumer behavior</i>  | 2490 (260 to 4980)     |                        | 151 (-204 to 521)    |                       | 285 (129 to 479)    |                      | 126 (30 to 227)    |                     |  |
|                                | <i>+industry response</i> | 4610 (2290 to 7240)    |                        | 336 (-26 to 725)     |                       | 396 (237 to 598)    |                      | 178 (82 to 284)    |                     |  |
| Race/Ethnicity                 |                           |                        |                        |                      |                       |                     |                      |                    |                     |  |
| Non-Hispanic White             | <i>consumer behavior</i>  | 1350<br>(-652 to 3690) | 0                      | -55<br>(-373 to 278) | 0                     | 165<br>(33 to 327)  | 0                    | 103<br>(10 to 204) | 0                   |  |
|                                | <i>+industry response</i> | 2620<br>(480 to 5150)  | 0                      | 54<br>(-264 to 419)  | 0                     | 238<br>(105 to 401) | 0                    | 139<br>(47 to 244) | 0                   |  |
| Non-Hispanic Black             | <i>consumer behavior</i>  | 560<br>(-109 to 1280)  | 0                      | 85<br>(-11 to 200)   | 0                     | 95<br>(32 to 173)   | 0                    | 13<br>(-12 to 40)  | 0                   |  |
|                                | <i>+industry response</i> | 901<br>(238 to 1660)   | 0                      | 126<br>(26 to 247)   | 0                     | 117<br>(53 to 196)  | 0                    | 21<br>(-4 to 49)   | 0                   |  |
| Hispanic                       | <i>consumer behavior</i>  | 572<br>(45 to 1180)    | 0                      | 76<br>(-7 to 163)    | 0                     | 9<br>(-21 to 44)    | 0                    | 10<br>(-3 to 24)   | 0                   |  |
|                                | <i>+industry response</i> | 922<br>(364 to 1570)   | 0                      | 104<br>(21 to 193)   | 0                     | 21<br>(-9 to 57)    | 0                    | 15<br>(2 to 30)    | 0                   |  |
| Other                          | <i>consumer behavior</i>  | 0<br>(-306 to 378)     | 0                      | 39<br>(9 to 76)      | 0                     | 15<br>(2 to 31)     | 0                    | -1<br>(-6 to 3)    | 0                   |  |
|                                | <i>+industry response</i> | 125<br>(-185 to 532)   | 0                      | 45<br>(16 to 84)     | 0                     | 19<br>(6 to 35)     | 0                    | 0<br>(-5 to 5)     | 0                   |  |
| <b>Liver</b>                   |                           |                        |                        |                      |                       |                     |                      |                    |                     |  |
| Age                            | <i>consumer behavior</i>  | 2840 (897 to 4890)     |                        | 628 (-181 to 1570)   |                       | 852 (411 to 1340)   |                      | 227 (18 to 455)    |                     |  |
|                                | <i>+industry response</i> | 4900 (2760 to 7190)    |                        | 1200 (345 to 2210)   |                       | 1140 (689 to 1650)  |                      | 357 (146 to 587)   |                     |  |
| Race/Ethnicity                 |                           |                        |                        |                      |                       |                     |                      |                    |                     |  |
| Non-Hispanic White             | <i>consumer behavior</i>  | 139<br>(-108 to 504)   | 1040<br>(-237 to 2780) | 15<br>(-147 to 207)  | -70<br>(-749 to 722)  | 98<br>(31 to 196)   | 440<br>(93 to 858)   | 63<br>(6 to 130)   | 97<br>(-88 to 297)  |  |
|                                | <i>+industry response</i> | 310<br>(42 to 719)     | 1900<br>(449 to 3830)  | 67<br>(-93 to 276)   | 199<br>(-478 to 1040) | 137<br>(67 to 240)  | 565<br>(241 to 1020) | 85<br>(30 to 159)  | 161<br>(-18 to 369) |  |

|    |                            |                           |                       |                       |                      |                      |                     |                     |                    |                   |
|----|----------------------------|---------------------------|-----------------------|-----------------------|----------------------|----------------------|---------------------|---------------------|--------------------|-------------------|
| 1  | Non-Hispanic Black         | <i>consumer behavior</i>  | 134<br>(-25 to 317)   | 72<br>(-601 to 932)   | 49<br>(3 to 110)     | 193<br>(-133 to 632) | 43<br>(12 to 85)    | 100<br>(-95 to 336) | 6<br>(-6 to 22)    | 29<br>(-4 to 69)  |
| 2  |                            | <i>+industry response</i> | 214<br>(51 to 425)    | 382<br>(-273 to 1280) | 68<br>(23 to 133)    | 276<br>(-37 to 729)  | 54<br>(24 to 97)    | 139<br>(-49 to 377) | 10<br>(-2 to 27)   | 41<br>(8 to 83)   |
| 3  | Hispanic                   | <i>consumer behavior</i>  | 199<br>(17 to 473)    | 1020<br>(88 to 2210)  | 87<br>(2 to 189)     | 285<br>(13 to 630)   | 12<br>(-26 to 62)   | 99<br>(18 to 201)   | 15<br>(-4 to 35)   | 6<br>(-28 to 46)  |
| 4  |                            | <i>+industry response</i> | 316<br>(111 to 623)   | 1430<br>(482 to 2690) | 116<br>(31 to 223)   | 365<br>(94 to 729)   | 26<br>(-11 to 78)   | 131<br>(48 to 242)  | 21<br>(3 to 43)    | 17<br>(-15 to 59) |
| 5  | Other                      | <i>consumer behavior</i>  | 2<br>(-47 to 68)      | 90<br>(-110 to 339)   | 32<br>(7 to 65)      | -2<br>(-88 to 108)   | 12<br>(0 to 28)     | 30<br>(4 to 61)     | 0<br>(-6 to 6)     | 7<br>(-22 to 42)  |
| 6  |                            | <i>+industry response</i> | 22<br>(-28 to 93)     | 168<br>(-26 to 434)   | 36<br>(13 to 71)     | 15<br>(-70 to 130)   | 16<br>(4 to 32)     | 39<br>(14 to 74)    | 1<br>(-4 to 8)     | 11<br>(-18 to 46) |
| 7  |                            |                           |                       |                       |                      |                      |                     |                     |                    |                   |
| 8  | <b>Endometrial</b>         |                           |                       |                       |                      |                      |                     |                     |                    |                   |
| 9  | Age                        | <i>consumer behavior</i>  | 1190 (309 to 2140)    |                       | 251 (-248 to 785)    |                      | 394 (177 to 659)    |                     | 213 (51 to 378)    |                   |
| 10 |                            | <i>+industry response</i> | 2100 (1200 to 3110)   |                       | 512 (26 to 1060)     |                      | 548 (325 to 817)    |                     | 302 (139 to 472)   |                   |
| 11 | Race/Ethnicity             |                           |                       |                       |                      |                      |                     |                     |                    |                   |
| 12 | Non-Hispanic White         | <i>consumer behavior</i>  | 440<br>(-210 to 1170) | 0                     | -42<br>(-511 to 440) | 0                    | 206<br>(36 to 399)  | 0                   | 173<br>(13 to 319) | 0                 |
| 13 |                            | <i>+industry response</i> | 858<br>(218 to 1620)  | 0                     | 114<br>(-351 to 606) | 0                    | 298<br>(127 to 491) | 0                   | 234<br>(76 to 388) | 0                 |
| 14 | Non-Hispanic Black         | <i>consumer behavior</i>  | 412<br>(-90 to 937)   | 0                     | 139<br>(-9 to 293)   | 0                    | 157<br>(42 to 295)  | 0                   | 26<br>(-24 to 83)  | 0                 |
| 15 |                            | <i>+industry response</i> | 666<br>(177 to 1210)  | 0                     | 201<br>(51 to 361)   | 0                    | 195<br>(81 to 338)  | 0                   | 42<br>(-8 to 97)   | 0                 |
| 16 | Hispanic                   | <i>consumer behavior</i>  | 315<br>(22 to 645)    | 0                     | 105<br>(-22 to 222)  | 0                    | 16<br>(-33 to 70)   | 0                   | 19<br>(-7 to 44)   | 0                 |
| 17 |                            | <i>+industry response</i> | 505<br>(197 to 854)   | 0                     | 144<br>(21 to 261)   | 0                    | 34<br>(-14 to 89)   | 0                   | 28<br>(3 to 54)    | 0                 |
| 18 | Other                      | <i>consumer behavior</i>  | 8<br>(-99 to 139)     | 0                     | 51<br>(13 to 99)     | 0                    | 17<br>(1 to 36)     | 0                   | -3<br>(-10 to 5)   | 0                 |
| 19 |                            | <i>+industry response</i> | 50<br>(-56 to 187)    | 0                     | 58<br>(21 to 107)    | 0                    | 22<br>(6 to 41)     | 0                   | 0<br>(-8 to 7)     | 0                 |
| 20 |                            |                           |                       |                       |                      |                      |                     |                     |                    |                   |
| 21 | <b>Kidney (Renal Cell)</b> |                           |                       |                       |                      |                      |                     |                     |                    |                   |
| 22 | Age                        | <i>consumer behavior</i>  | 1050 (284 to 1830)    |                       | 263 (-153 to 695)    |                      | 506 (225 to 778)    |                     | 182 (20 to 338)    |                   |
| 23 |                            | <i>+industry response</i> | 1880 (1100 to 2680)   |                       | 539 (106 to 977)     |                      | 679 (402 to 954)    |                     | 276 (112 to 429)   |                   |
| 24 | Race/Ethnicity             |                           |                       |                       |                      |                      |                     |                     |                    |                   |

|    |                    |                           |                     |                      |                      |                      |                    |                     |                   |                     |
|----|--------------------|---------------------------|---------------------|----------------------|----------------------|----------------------|--------------------|---------------------|-------------------|---------------------|
| 1  | Non-Hispanic White | <i>consumer behavior</i>  | 57<br>(-23 to 159)  | 332<br>(-183 to 922) | -16<br>(-128 to 106) | 26<br>(-351 to 396)  | 72<br>(14 to 138)  | 287<br>(42 to 525)  | 66<br>(9 to 124)  | 81<br>(-68 to 219)  |
| 2  |                    |                           |                     |                      |                      |                      |                    |                     |                   |                     |
| 3  |                    | <i>+industry response</i> | 111<br>(27 to 224)  | 663<br>(123 to 1280) | 22<br>(-90 to 146)   | 168<br>(-199 to 552) | 105<br>(46 to 171) | 378<br>(138 to 623) | 89<br>(33 to 148) | 133<br>(-12 to 272) |
| 4  | Non-Hispanic Black | <i>consumer behavior</i>  | 67<br>(-16 to 162)  | 48<br>(-225 to 326)  | 24<br>(-2 to 53)     | 59<br>(-40 to 171)   | 30<br>(10 to 56)   | 35<br>(-32 to 106)  | 5<br>(-5 to 16)   | 16<br>(3 to 28)     |
| 5  |                    |                           |                     |                      |                      |                      |                    |                     |                   |                     |
| 6  |                    | <i>+industry response</i> | 113<br>(25 to 218)  | 174<br>(-96 to 461)  | 34<br>(9 to 64)      | 87<br>(-14 to 199)   | 37<br>(17 to 63)   | 49<br>(-17 to 121)  | 8<br>(-2 to 20)   | 20<br>(7 to 33)     |
| 7  | Hispanic           | <i>consumer behavior</i>  | 111<br>(9 to 229)   | 367<br>(0 to 792)    | 30<br>(-3 to 62)     | 118<br>(-15 to 261)  | 6<br>(-13 to 29)   | 47<br>(5 to 98)     | 7<br>(-2 to 17)   | 4<br>(-12 to 23)    |
| 8  |                    |                           |                     |                      |                      |                      |                    |                     |                   |                     |
| 9  |                    | <i>+industry response</i> | 177<br>(67 to 305)  | 522<br>(168 to 968)  | 40<br>(8 to 74)      | 157<br>(23 to 303)   | 13<br>(-5 to 36)   | 64<br>(22 to 116)   | 11<br>(1 to 21)   | 9<br>(-7 to 28)     |
| 10 | Other              | <i>consumer behavior</i>  | 3<br>(-23 to 34)    | 33<br>(-40 to 122)   | 15<br>(5 to 28)      | 0<br>(-28 to 33)     | 5<br>(1 to 11)     | 16<br>(5 to 29)     | -1<br>(-3 to 2)   | 4<br>(-8 to 17)     |
| 11 |                    |                           |                     |                      |                      |                      |                    |                     |                   |                     |
| 12 |                    | <i>+industry response</i> | 13<br>(-12 to 45)   | 63<br>(-10 to 156)   | 17<br>(7 to 30)      | 6<br>(-22 to 39)     | 6<br>(2 to 12)     | 20<br>(9 to 33)     | 0<br>(-2 to 3)    | 5<br>(-6 to 18)     |
| 13 |                    |                           |                     |                      |                      |                      |                    |                     |                   |                     |
| 14 |                    |                           |                     |                      |                      |                      |                    |                     |                   |                     |
| 15 |                    |                           |                     |                      |                      |                      |                    |                     |                   |                     |
| 16 |                    |                           |                     |                      |                      |                      |                    |                     |                   |                     |
| 17 | <b>Pancreatic</b>  |                           |                     |                      |                      |                      |                    |                     |                   |                     |
| 18 | Age                | <i>consumer behavior</i>  | 656 (220 to 1160)   |                      | 74 (-166 to 350)     |                      | 362 (175 to 581)   |                     | 131 (20 to 250)   |                     |
| 19 |                    |                           |                     |                      |                      |                      |                    |                     |                   |                     |
| 20 |                    | <i>+industry response</i> | 1160 (707 to 1730)  |                      | 243 (1 to 535)       |                      | 483 (293 to 708)   |                     | 199 (87 to 321)   |                     |
| 21 |                    |                           |                     |                      |                      |                      |                    |                     |                   |                     |
| 22 | Race/Ethnicity     |                           |                     |                      |                      |                      |                    |                     |                   |                     |
| 23 | Non-Hispanic White | <i>consumer behavior</i>  | 101<br>(-40 to 310) | 213<br>(-100 to 659) | -44<br>(-143 to 78)  | -13<br>(-216 to 221) | 79<br>(24 to 158)  | 193<br>(44 to 384)  | 56<br>(3 to 117)  | 50<br>(-45 to 162)  |
| 24 |                    |                           |                     |                      |                      |                      |                    |                     |                   |                     |
| 25 |                    | <i>+industry response</i> | 196<br>(42 to 425)  | 420<br>(85 to 911)   | -10<br>(-111 to 120) | 67<br>(-140 to 326)  | 111<br>(51 to 198) | 250<br>(102 to 448) | 78<br>(25 to 146) | 84<br>(-10 to 203)  |
| 26 | Non-Hispanic Black | <i>consumer behavior</i>  | 48<br>(-7 to 125)   | 16<br>(-72 to 117)   | 22<br>(-1 to 49)     | 27<br>(-18 to 78)    | 29<br>(8 to 57)    | 18<br>(-15 to 56)   | 5<br>(-5 to 17)   | 9<br>(1 to 17)      |
| 27 |                    |                           |                     |                      |                      |                      |                    |                     |                   |                     |
| 28 |                    | <i>+industry response</i> | 78<br>(18 to 162)   | 57<br>(-33 to 164)   | 31<br>(9 to 62)      | 39<br>(-3 to 91)     | 36<br>(15 to 65)   | 24<br>(-8 to 63)    | 8<br>(-1 to 20)   | 12<br>(4 to 19)     |
| 29 | Hispanic           | <i>consumer behavior</i>  | 55<br>(5 to 118)    | 175<br>(13 to 374)   | 24<br>(-4 to 53)     | 42<br>(-5 to 97)     | 4<br>(-10 to 20)   | 16<br>(-2 to 40)    | 5<br>(-2 to 13)   | 1<br>(-7 to 10)     |
| 30 |                    |                           |                     |                      |                      |                      |                    |                     |                   |                     |
| 31 |                    | <i>+industry response</i> | 88<br>(33 to 158)   | 245<br>(83 to 462)   | 32<br>(6 to 63)      | 57<br>(10 to 113)    | 9<br>(-5 to 25)    | 23<br>(5 to 48)     | 8<br>(1 to 16)    | 4<br>(-4 to 13)     |
| 32 | Other              | <i>consumer behavior</i>  | -2<br>(-23 to 25)   | 16<br>(-23 to 63)    | 14<br>(3 to 27)      | 0<br>(-18 to 20)     | 7<br>(1 to 14)     | 9<br>(3 to 17)      | 0<br>(-3 to 3)    | 2<br>(-5 to 11)     |
| 33 |                    |                           |                     |                      |                      |                      |                    |                     |                   |                     |
| 34 |                    | <i>+industry response</i> | 7<br>(-14 to 36)    | 32<br>(-7 to 82)     | 16<br>(6 to 30)      | 3<br>(-14 to 24)     | 9<br>(2 to 16)     | 11<br>(5 to 19)     | 1<br>(-2 to 4)    | 3<br>(-4 to 12)     |
| 35 |                    |                           |                     |                      |                      |                      |                    |                     |                   |                     |
| 36 |                    |                           |                     |                      |                      |                      |                    |                     |                   |                     |
| 37 |                    |                           |                     |                      |                      |                      |                    |                     |                   |                     |
| 38 |                    |                           |                     |                      |                      |                      |                    |                     |                   |                     |
| 39 |                    |                           |                     |                      |                      |                      |                    |                     |                   |                     |
| 40 |                    |                           |                     |                      |                      |                      |                    |                     |                   |                     |
| 41 |                    |                           |                     |                      |                      |                      |                    |                     |                   |                     |
| 42 |                    |                           |                     |                      |                      |                      |                    |                     |                   |                     |
| 43 |                    |                           |                     |                      |                      |                      |                    |                     |                   |                     |
| 44 |                    |                           |                     |                      |                      |                      |                    |                     |                   |                     |
| 45 |                    |                           |                     |                      |                      |                      |                    |                     |                   |                     |
| 46 |                    |                           |                     |                      |                      |                      |                    |                     |                   |                     |
| 47 |                    |                           |                     |                      |                      |                      |                    |                     |                   |                     |

| <b>Esophageal Adenocarcinoma</b> |                           |                    |                       |                    |                      |                  |                     |                  |                     |
|----------------------------------|---------------------------|--------------------|-----------------------|--------------------|----------------------|------------------|---------------------|------------------|---------------------|
| Age                              | <i>consumer behavior</i>  | 631 (33 to 1320)   |                       | 78 (-255 to 423)   |                      | 348 (113 to 584) |                     | 101 (-42 to 239) |                     |
|                                  | <i>+industry response</i> | 1150 (520 to 1870) |                       | 246 (-96 to 601)   |                      | 457 (225 to 699) |                     | 161 (19 to 302)  |                     |
| <b>Race/Ethnicity</b>            |                           |                    |                       |                    |                      |                  |                     |                  |                     |
| Non-Hispanic White               | <i>consumer behavior</i>  | 40<br>(-23 to 112) | 366<br>(-206 to 1000) | -8<br>(-47 to 36)  | 24<br>(-314 to 359)  | 24<br>(6 to 47)  | 283<br>(55 to 516)  | 22<br>(4 to 41)  | 71<br>(-65 to 202)  |
|                                  | <i>+industry response</i> | 81<br>(15 to 160)  | 732<br>(157 to 1400)  | 5<br>(-34 to 51)   | 152<br>(-176 to 495) | 35<br>(16 to 59) | 366<br>(142 to 602) | 28<br>(11 to 48) | 119<br>(-13 to 253) |
| Non-Hispanic Black               | <i>consumer behavior</i>  | 9<br>(-1 to 20)    | 9<br>(-25 to 45)      | 3<br>(0 to 7)      | 10<br>(-6 to 28)     | 4<br>(1 to 8)    | 6<br>(-6 to 18)     | 1<br>(-1 to 2)   | 3<br>(0 to 5)       |
|                                  | <i>+industry response</i> | 14<br>(3 to 26)    | 25<br>(-10 to 62)     | 4<br>(1 to 8)      | 14<br>(-2 to 33)     | 5<br>(2 to 9)    | 8<br>(-3 to 21)     | 1<br>(0 to 3)    | 4<br>(1 to 6)       |
| Hispanic                         | <i>consumer behavior</i>  | 25<br>(2 to 52)    | 164<br>(2 to 354)     | 3<br>(-1 to 13)    | 40<br>(-7 to 99)     | 1<br>(-3 to 7)   | 21<br>(3 to 42)     | 1<br>(-1 to 4)   | 1<br>(-6 to 10)     |
|                                  | <i>+industry response</i> | 40<br>(15 to 68)   | 235<br>(70 to 425)    | 5<br>(0 to 16)     | 55<br>(6 to 114)     | 3<br>(-1 to 8)   | 28<br>(10 to 50)    | 2<br>(0 to 4)    | 4<br>(-4 to 12)     |
| Other                            | <i>consumer behavior</i>  | -1<br>(-9 to 10)   | 9<br>(-14 to 35)      | 5<br>(1 to 9)      | -1<br>(-10 to 10)    | 2<br>(0 to 4)    | 6<br>(2 to 10)      | 0<br>(-1 to 1)   | 1<br>(-3 to 7)      |
|                                  | <i>+industry response</i> | 3<br>(-6 to 14)    | 18<br>(-5 to 46)      | 6<br>(2 to 10)     | 1<br>(-8 to 12)      | 2<br>(1 to 5)    | 7<br>(3 to 11)      | 0<br>(-1 to 1)   | 2<br>(-3 to 7)      |
| <b>Colorectal</b>                |                           |                    |                       |                    |                      |                  |                     |                  |                     |
| Age                              | <i>consumer behavior</i>  | 430 (139 to 779)   |                       | 56 (-48 to 184)    |                      | 150 (77 to 241)  |                     | 63 (13 to 119)   |                     |
|                                  | <i>+industry response</i> | 764 (450 to 1160)  |                       | 133 (23 to 268)    |                      | 203 (126 to 304) |                     | 95 (46 to 153)   |                     |
| <b>Race/Ethnicity</b>            |                           |                    |                       |                    |                      |                  |                     |                  |                     |
| Non-Hispanic White               | <i>consumer behavior</i>  | 49<br>(-36 to 181) | 119<br>(-75 to 391)   | -21<br>(-65 to 40) | -10<br>(-89 to 97)   | 32<br>(7 to 67)  | 72<br>(11 to 150)   | 31<br>(6 to 63)  | 22<br>(-17 to 64)   |
|                                  | <i>+industry response</i> | 106<br>(4 to 261)  | 248<br>(28 to 545)    | -6<br>(-49 to 59)  | 24<br>(-60 to 140)   | 46<br>(20 to 85) | 96<br>(36 to 176)   | 41<br>(16 to 76) | 35<br>(-3 to 81)    |
| Non-Hispanic Black               | <i>consumer behavior</i>  | 26<br>(-7 to 70)   | 27<br>(-36 to 104)    | 8<br>(0 to 21)     | 18<br>(-9 to 53)     | 13<br>(4 to 24)  | 9<br>(-10 to 31)    | 2<br>(-2 to 7)   | 5<br>(0 to 10)      |
|                                  | <i>+industry response</i> | 44<br>(9 to 94)    | 58<br>(-7 to 145)     | 12<br>(4 to 26)    | 25.1<br>(-1 to 61)   | 15<br>(7 to 27)  | 13<br>(-6 to 36)    | 3<br>(-1 to 9)   | 6<br>(2 to 12)      |
| Hispanic                         | <i>consumer behavior</i>  | 36<br>(2 to 88)    | 136<br>(21 to 300)    | 13<br>(0 to 27)    | 37<br>(5 to 74)      | 2<br>(-4 to 10)  | 13<br>(2 to 28)     | 2<br>(-1 to 7)   | 1<br>(-5 to 6)      |

|    |                                 |                  |                  |              |                  |               |                  |             |                 |             |  |
|----|---------------------------------|------------------|------------------|--------------|------------------|---------------|------------------|-------------|-----------------|-------------|--|
| 1  |                                 | <i>+industry</i> | 58               | 188          | 16               | 45            | 4                | 18          | 4               | 2           |  |
| 2  | Other                           | <i>response</i>  | (17 to 120)      | (65 to 366)  | (5 to 32)        | (14 to 84)    | (-2 to 13)       | (6 to 33)   | (0 to 8)        | (-3 to 8)   |  |
| 3  |                                 | <i>consumer</i>  | -1               | 16           | 5                | 0             | 2                | 5           | 0               | 1           |  |
| 4  |                                 | <i>behavior</i>  | (-15 to 20)      | (-21 to 65)  | (-1 to 11)       | (-12 to 15)   | (0 to 6)         | (1 to 9)    | (-2 to 1)       | (-3 to 6)   |  |
| 5  |                                 | <i>+industry</i> | 5                | 30           | 6                | 2             | 3                | 6           | 0               | 2           |  |
| 6  |                                 | <i>response</i>  | (-9 to 27)       | (-5 to 83)   | (1 to 13)        | (-9 to 17)    | (1 to 7)         | (2 to 11)   | (-1 to 2)       | (-2 to 7)   |  |
| 7  | <b>Stomach (Gastric Cardia)</b> |                  |                  |              |                  |               |                  |             |                 |             |  |
| 8  |                                 |                  |                  |              |                  |               |                  |             |                 |             |  |
| 9  |                                 |                  |                  |              |                  |               |                  |             |                 |             |  |
| 10 | Age                             | <i>consumer</i>  | 286 (45 to 672)  |              | 50 (-84 to 224)  |               | 149 (58 to 282)  |             | 42 (-14 to 113) |             |  |
| 11 |                                 | <i>behavior</i>  |                  |              |                  |               |                  |             |                 |             |  |
| 12 |                                 | <i>+industry</i> | 513 (196 to 965) |              | 120 (-14 to 321) |               | 196 (105 to 342) |             | 67 (13 to 145)  |             |  |
| 13 |                                 | <i>response</i>  |                  |              |                  |               |                  |             |                 |             |  |
| 14 | <b>Race/Ethnicity</b>           |                  |                  |              |                  |               |                  |             |                 |             |  |
| 15 | Non-Hispanic White              | <i>consumer</i>  | 14               | 178          | -7               | 21            | 13               | 118         | 11              | 27          |  |
| 16 |                                 | <i>behavior</i>  | (-16 to 63)      | (-46 to 545) | (-26 to 20)      | (-109 to 194) | (4 to 30)        | (29 to 248) | (3 to 22)       | (-26 to 95) |  |
| 17 |                                 | <i>+industry</i> | 34               | 322          | -1               | 74            | 18               | 152         | 14              | 45          |  |
| 18 | Non-Hispanic Black              | <i>response</i>  | (-5 to 95)       | (43 to 766)  | (-19 to 30)      | (-58 to 270)  | (7 to 38)        | (63 to 296) | (6 to 27)       | (-6 to 121) |  |
| 19 |                                 | <i>consumer</i>  | 5                | 2            | 2                | 6             | 2                | 3           | 0               | 2           |  |
| 20 |                                 | <i>behavior</i>  | (-1 to 17)       | (-11 to 29)  | (0 to 5)         | (-5 to 22)    | (1 to 5)         | (-5 to 13)  | (0 to 1)        | (1 to 4)    |  |
| 21 |                                 | <i>+industry</i> | 9                | 7            | 2                | 9             | 3                | 4           | 1               | 3           |  |
| 22 | Hispanic                        | <i>response</i>  | (2 to 22)        | (-5 to 43)   | (1 to 6)         | (-2 to 26)    | (2 to 6)         | (-3 to 15)  | (0 to 2)        | (1 to 5)    |  |
| 23 |                                 | <i>consumer</i>  | 13               | 57           | 5                | 14            | 1                | 6           | 1               | 0           |  |
| 24 |                                 | <i>behavior</i>  | (1 to 35)        | (-6 to 154)  | (0 to 12)        | (-3 to 38)    | (-1 to 4)        | (0 to 15)   | (0 to 2)        | (-2 to 4)   |  |
| 25 |                                 | <i>+industry</i> | 22               | 86           | 6                | 19            | 1                | 8           | 1               | 1           |  |
| 26 | Other                           | <i>response</i>  | (5 to 47)        | (20 to 194)  | (2 to 14)        | (3 to 46)     | (-1 to 5)        | (2 to 19)   | (0 to 3)        | (-1 to 6)   |  |
| 27 |                                 | <i>consumer</i>  | -1               | 4            | 4                | 0             | 1                | 3           | 0               | 1           |  |
| 28 |                                 | <i>behavior</i>  | (-5 to 7)        | (-9 to 25)   | (2 to 8)         | (-7 to 10)    | (0 to 3)         | (1 to 7)    | (-1 to 1)       | (-2 to 5)   |  |
| 29 |                                 | <i>+industry</i> | 1                | 9            | 4                | 2             | 1                | 4           | 0               | 1           |  |
| 30 |                                 | <i>response</i>  | (-3 to 9)        | (-4 to 34)   | (2 to 8)         | (-5 to 12)    | (0 to 3)         | (2 to 8)    | (0 to 1)        | (-2 to 5)   |  |
| 31 |                                 |                  |                  |              |                  |               |                  |             |                 |             |  |
| 32 | <b>Multiple Myeloma</b>         |                  |                  |              |                  |               |                  |             |                 |             |  |
| 33 |                                 |                  |                  |              |                  |               |                  |             |                 |             |  |
| 34 | Age                             | <i>consumer</i>  | 220 (65 to 441)  |              | 51 (-29 to 150)  |               | 112 (54 to 186)  |             | 42 (6 to 84)    |             |  |
| 35 |                                 | <i>behavior</i>  |                  |              |                  |               |                  |             |                 |             |  |
| 36 |                                 | <i>+industry</i> | 380 (202 to 657) |              | 105 (20 to 215)  |               | 151 (89 to 232)  |             | 63 (27 to 111)  |             |  |
| 37 |                                 | <i>response</i>  |                  |              |                  |               |                  |             |                 |             |  |
| 38 | <b>Race/Ethnicity</b>           |                  |                  |              |                  |               |                  |             |                 |             |  |
| 39 | Non-Hispanic White              | <i>consumer</i>  | 11               | 59           | -8               | -3            | 15               | 58          | 14              | 15          |  |
| 40 |                                 | <i>behavior</i>  | (-13 to 52)      | (-34 to 221) | (-32 to 31)      | (-59 to 83)   | (2 to 41)        | (15 to 123) | (1 to 35)       | (-14 to 54) |  |
| 41 |                                 |                  |                  |              |                  |               |                  |             |                 |             |  |
| 42 |                                 |                  |                  |              |                  |               |                  |             |                 |             |  |
| 43 |                                 |                  |                  |              |                  |               |                  |             |                 |             |  |
| 44 |                                 |                  |                  |              |                  |               |                  |             |                 |             |  |
| 45 |                                 |                  |                  |              |                  |               |                  |             |                 |             |  |
| 46 |                                 |                  |                  |              |                  |               |                  |             |                 |             |  |
| 47 |                                 |                  |                  |              |                  |               |                  |             |                 |             |  |

|    |                          |                           |                   |                    |                   |                    |                  |                   |                 |                  |
|----|--------------------------|---------------------------|-------------------|--------------------|-------------------|--------------------|------------------|-------------------|-----------------|------------------|
| 1  |                          | <i>+industry response</i> | 26<br>(-7 to 81)  | 122<br>(1 to 321)  | -1<br>(-23 to 45) | 19<br>(-37 to 123) | 22<br>(6 to 53)  | 75<br>(32 to 147) | 19<br>(6 to 44) | 26<br>(-3 to 71) |
| 2  | Non-                     | <i>consumer behavior</i>  | 17<br>(-4 to 63)  | 14<br>(-40 to 115) | 10<br>(0 to 29)   | 17<br>(-10 to 59)  | 12<br>(3 to 28)  | 7<br>(-14 to 38)  | 2<br>(-3 to 11) | 6<br>(1 to 12)   |
| 3  | Hispanic Black           | <i>+industry response</i> | 29<br>(1 to 83)   | 44<br>(-20 to 159) | 15<br>(3 to 37)   | 24<br>(-1 to 70)   | 15<br>(6 to 34)  | 11<br>(-8 to 45)  | 4<br>(-1 to 13) | 7<br>(3 to 15)   |
| 4  |                          | <i>consumer behavior</i>  | 16<br>(0 to 51)   | 72<br>(9 to 193)   | 5<br>(-3 to 17)   | 15<br>(-2 to 42)   | 1<br>(-3 to 8)   | 10<br>(2 to 22)   | 2<br>(-1 to 5)  | 0<br>(-3 to 5)   |
| 5  | Hispanic                 | <i>+industry response</i> | 28<br>(5 to 71)   | 100<br>(31 to 244) | 7<br>(0 to 21)    | 21<br>(4 to 51)    | 3<br>(-1 to 10)  | 13<br>(5 to 26)   | 3<br>(0 to 6)   | 1<br>(-2 to 6)   |
| 6  |                          | <i>consumer behavior</i>  | 0<br>(-3 to 6)    | 5<br>(-7 to 27)    | 4<br>(2 to 7)     | 0<br>(-6 to 7)     | 1<br>(0 to 2)    | 3<br>(1 to 6)     | 0<br>(-1 to 1)  | 1<br>(-2 to 4)   |
| 7  | Other                    | <i>+industry response</i> | 1<br>(-2 to 8)    | 10<br>(-2 to 36)   | 4<br>(2 to 8)     | 1<br>(-5 to 9)     | 1<br>(0 to 3)    | 4<br>(2 to 7)     | 0<br>(-1 to 1)  | 1<br>(-1 to 4)   |
| 8  |                          |                           |                   |                    |                   |                    |                  |                   |                 |                  |
| 9  | <b>Gallbladder</b>       |                           |                   |                    |                   |                    |                  |                   |                 |                  |
| 10 | Age                      | <i>consumer behavior</i>  | 136 (58 to 229)   |                    | 44 (7 to 86)      |                    | 65 (40 to 93)    |                   | 24 (9 to 41)    |                  |
| 11 |                          | <i>+industry response</i> | 239 (153 to 341)  |                    | 74 (36 to 119)    |                    | 86 (61 to 117)   |                   | 36 (20 to 53)   |                  |
| 12 |                          |                           |                   |                    |                   |                    |                  |                   |                 |                  |
| 13 | Race/Ethnicity           |                           |                   |                    |                   |                    |                  |                   |                 |                  |
| 14 | Non-                     | <i>consumer behavior</i>  | 22<br>(-10 to 64) | 15<br>(-10 to 52)  | 0<br>(-23 to 27)  | 2<br>(-14 to 19)   | 16<br>(4 to 32)  | 19<br>(6 to 36)   | 13<br>(2 to 25) | 5<br>(-4 to 14)  |
| 15 | Hispanic White           | <i>+industry response</i> | 43<br>(9 to 90)   | 32<br>(4 to 72)    | 8<br>(-15 to 37)  | 8<br>(-8 to 27)    | 23<br>(10 to 40) | 24<br>(11 to 42)  | 17<br>(6 to 30) | 8<br>(-1 to 18)  |
| 16 | Non-                     | <i>consumer behavior</i>  | 24<br>(-5 to 61)  | 2<br>(-14 to 21)   | 10<br>(0 to 21)   | 4<br>(-3 to 14)    | 12<br>(4 to 23)  | 3<br>(-3 to 10)   | 2<br>(-2 to 6)  | 2<br>(0 to 3)    |
| 17 | Hispanic Black           | <i>+industry response</i> | 40<br>(10 to 80)  | 9<br>(-7 to 31)    | 14<br>(4 to 27)   | 6<br>(-1 to 17)    | 15<br>(7 to 26)  | 4<br>(-2 to 12)   | 3<br>(0 to 7)   | 2<br>(1 to 4)    |
| 18 |                          | <i>consumer behavior</i>  | 28<br>(2 to 63)   | 33<br>(-8 to 85)   | 9<br>(-4 to 23)   | 12<br>(-2 to 30)   | 2<br>(-4 to 10)  | 6<br>(1 to 13)    | 2<br>(-1 to 6)  | 0<br>(-2 to 3)   |
| 19 | Hispanic                 | <i>+industry response</i> | 45<br>(16 to 83)  | 51<br>(9 to 106)   | 13<br>(1 to 28)   | 16<br>(3 to 35)    | 4<br>(-2 to 13)  | 8<br>(3 to 16)    | 4<br>(0 to 8)   | 1<br>(-1 to 4)   |
| 20 |                          | <i>consumer behavior</i>  | 0<br>(-10 to 16)  | 2<br>(-5 to 12)    | 5<br>(1 to 11)    | 0<br>(-2 to 2)     | 3<br>(0 to 6)    | 2<br>(1 to 4)     | 0<br>(-1 to 1)  | 0<br>(-1 to 2)   |
| 21 | Other                    | <i>+industry response</i> | 4<br>(-6 to 21)   | 5<br>(-2 to 15)    | 6<br>(2 to 12)    | 0<br>(-1 to 3)     | 4<br>(1 to 7)    | 3<br>(1 to 5)     | 0<br>(-1 to 2)  | 1<br>(-1 to 2)   |
| 22 |                          |                           |                   |                    |                   |                    |                  |                   |                 |                  |
| 23 | <b>Advanced Prostate</b> |                           |                   |                    |                   |                    |                  |                   |                 |                  |
| 24 | Age                      | <i>consumer behavior</i>  | 101 (13 to 214)   |                    | 18 (-17 to 58)    |                    | 33 (11 to 58)    |                   | 15 (-4 to 38)   |                  |
| 25 |                          |                           |                   |                    |                   |                    |                  |                   |                 |                  |
| 26 |                          |                           |                   |                    |                   |                    |                  |                   |                 |                  |
| 27 |                          |                           |                   |                    |                   |                    |                  |                   |                 |                  |
| 28 |                          |                           |                   |                    |                   |                    |                  |                   |                 |                  |
| 29 |                          |                           |                   |                    |                   |                    |                  |                   |                 |                  |
| 30 |                          |                           |                   |                    |                   |                    |                  |                   |                 |                  |
| 31 |                          |                           |                   |                    |                   |                    |                  |                   |                 |                  |
| 32 |                          |                           |                   |                    |                   |                    |                  |                   |                 |                  |
| 33 |                          |                           |                   |                    |                   |                    |                  |                   |                 |                  |
| 34 |                          |                           |                   |                    |                   |                    |                  |                   |                 |                  |
| 35 |                          |                           |                   |                    |                   |                    |                  |                   |                 |                  |
| 36 |                          |                           |                   |                    |                   |                    |                  |                   |                 |                  |
| 37 |                          |                           |                   |                    |                   |                    |                  |                   |                 |                  |
| 38 |                          |                           |                   |                    |                   |                    |                  |                   |                 |                  |
| 39 |                          |                           |                   |                    |                   |                    |                  |                   |                 |                  |
| 40 |                          |                           |                   |                    |                   |                    |                  |                   |                 |                  |
| 41 |                          |                           |                   |                    |                   |                    |                  |                   |                 |                  |
| 42 |                          |                           |                   |                    |                   |                    |                  |                   |                 |                  |
| 43 |                          |                           |                   |                    |                   |                    |                  |                   |                 |                  |
| 44 |                          |                           |                   |                    |                   |                    |                  |                   |                 |                  |
| 45 |                          |                           |                   |                    |                   |                    |                  |                   |                 |                  |
| 46 |                          |                           |                   |                    |                   |                    |                  |                   |                 |                  |
| 47 |                          |                           |                   |                    |                   |                    |                  |                   |                 |                  |

|    |                |                           |                 |                 |                |                |               |               |               |               |
|----|----------------|---------------------------|-----------------|-----------------|----------------|----------------|---------------|---------------|---------------|---------------|
| 1  |                | <i>+industry response</i> | 174 (80 to 304) |                 | 37 (1 to 83)   |                | 43 (22 to 71) |               | 24 (6 to 48)  |               |
| 2  | Race/Ethnicity |                           |                 |                 |                |                |               |               |               |               |
| 3  | Non-           |                           |                 |                 |                |                |               |               |               |               |
| 4  | Hispanic       | <i>consumer behavior</i>  | 0               | 43 (-13 to 140) | 0              | 0 (-29 to 35)  | 0             | 20 (3 to 42)  | 0             | 10 (-9 to 32) |
| 5  | White          |                           |                 |                 |                |                |               |               |               |               |
| 6  |                | <i>+industry response</i> | 0               | 82 (16 to 192)  | 0              | 11 (-17 to 50) | 0             | 27 (10 to 51) | 0             | 16 (-2 to 40) |
| 7  | Non-           | <i>consumer behavior</i>  | 0               | 2 (-31 to 51)   | 0              | 9 (-7 to 30)   | 0             | 7 (-5 to 20)  | 0             | 4 (1 to 9)    |
| 8  | Hispanic Black |                           |                 |                 |                |                |               |               |               |               |
| 9  |                | <i>+industry response</i> | 0               | 17 (-16 to 75)  | 0              | 13 (-2 to 36)  | 0             | 9 (-3 to 23)  | 0             | 6 (2 to 11)   |
| 10 | Hispanic       | <i>consumer behavior</i>  | 0               | 47 (7 to 103)   | 0              | 7 (-2 to 20)   | 0             | 4 (1 to 9)    | 0             | 0 (-1 to 3)   |
| 11 |                | <i>+industry response</i> | 0               | 64 (23 to 127)  | 0              | 10 (1 to 25)   | 0             | 6 (2 to 11)   | 0             | 1 (-1 to 3)   |
| 12 | Other          | <i>consumer behavior</i>  | 0               | 1 (-4 to 12)    | 0              | 0 (-2 to 3)    | 0             | 1 (0 to 2)    | 0             | 0 (-1 to 2)   |
| 13 |                | <i>+industry response</i> | 0               | 2 (-1 to 16)    | 0              | 0 (-2 to 3)    | 0             | 1 (1 to 2)    | 0             | 1 (-1 to 2)   |
| 14 |                |                           |                 |                 |                |                |               |               |               |               |
| 15 |                |                           |                 |                 |                |                |               |               |               |               |
| 16 |                |                           |                 |                 |                |                |               |               |               |               |
| 17 |                |                           |                 |                 |                |                |               |               |               |               |
| 18 |                |                           |                 |                 |                |                |               |               |               |               |
| 19 |                |                           |                 |                 |                |                |               |               |               |               |
| 20 | <b>Ovarian</b> |                           |                 |                 |                |                |               |               |               |               |
| 21 | Age            | <i>consumer behavior</i>  | 45 (-3 to 114)  |                 | 13 (-14 to 54) |                | 24 (9 to 51)  |               | 21 (8 to 46)  |               |
| 22 |                | <i>+industry response</i> | 87 (19 to 175)  |                 | 25 (-4 to 75)  |                | 34 (14 to 64) |               | 28 (15 to 56) |               |
| 23 |                |                           |                 |                 |                |                |               |               |               |               |
| 24 | Race/Ethnicity |                           |                 |                 |                |                |               |               |               |               |
| 25 | Non-           |                           |                 |                 |                |                |               |               |               |               |
| 26 | Hispanic       | <i>consumer behavior</i>  | 21 (-15 to 89)  | 0               | -3 (-29 to 38) | 0              | 15 (2 to 41)  | 0             | 19 (6 to 43)  | 0             |
| 27 | White          |                           |                 |                 |                |                |               |               |               |               |
| 28 |                | <i>+industry response</i> | 45 (-10 to 131) | 0               | 5 (-21 to 52)  | 0              | 22 (5 to 51)  | 0             | 25 (11 to 52) | 0             |
| 29 | Non-           | <i>consumer behavior</i>  | 7 (-3 to 27)    | 0               | 3 (0 to 11)    | 0              | 5 (2 to 11)   | 0             | 1 (-1 to 4)   | 0             |
| 30 | Hispanic Black |                           |                 |                 |                |                |               |               |               |               |
| 31 |                | <i>+industry response</i> | 13 (-1 to 38)   | 0               | 5 (1 to 13)    | 0              | 7 (3 to 13)   | 0             | 1 (0 to 5)    | 0             |
| 32 | Hispanic       | <i>consumer behavior</i>  | 15 (0 to 48)    | 0               | 6 (-1 to 16)   | 0              | 1 (-2 to 6)   | 0             | 1 (-1 to 4)   | 0             |
| 33 |                | <i>+industry response</i> | 25 (2 to 64)    | 0               | 8 (2 to 20)    | 0              | 2 (-1 to 8)   | 0             | 2 (0 to 5)    | 0             |
| 34 | Other          | <i>consumer behavior</i>  | -5 (-13 to 9)   | 0               | 5 (1 to 10)    | 0              | 2 (0 to 4)    | 0             | 0 (-1 to 1)   | 0             |
| 35 |                | <i>+industry response</i> | -1 (-9 to 15)   | 0               | 5 (2 to 11)    | 0              | 2 (1 to 4)    | 0             | 0 (0 to 1)    | 0             |
| 36 |                |                           |                 |                 |                |                |               |               |               |               |
| 37 |                |                           |                 |                 |                |                |               |               |               |               |
| 38 |                |                           |                 |                 |                |                |               |               |               |               |
| 39 |                |                           |                 |                 |                |                |               |               |               |               |
| 40 |                |                           |                 |                 |                |                |               |               |               |               |
| 41 |                |                           |                 |                 |                |                |               |               |               |               |
| 42 |                |                           |                 |                 |                |                |               |               |               |               |
| 43 |                |                           |                 |                 |                |                |               |               |               |               |
| 44 |                |                           |                 |                 |                |                |               |               |               |               |
| 45 |                |                           |                 |                 |                |                |               |               |               |               |
| 46 |                |                           |                 |                 |                |                |               |               |               |               |
| 47 |                |                           |                 |                 |                |                |               |               |               |               |



| <b>Thyroid</b> |                |                  |              |            |              |           |             |           |            |
|----------------|----------------|------------------|--------------|------------|--------------|-----------|-------------|-----------|------------|
| 1              |                |                  |              |            |              |           |             |           |            |
| 2              | Age            | <i>consumer</i>  | 9 (2 to 22)  |            | 3 (-4 to 11) |           | 6 (3 to 12) |           | 4 (1 to 7) |
| 3              |                | <i>behavior</i>  |              |            |              |           |             |           |            |
| 4              |                | <i>+industry</i> | 16 (7 to 33) |            | 6 (0 to 16)  |           | 9 (5 to 15) |           | 5 (3 to 9) |
| 5              |                | <i>response</i>  |              |            |              |           |             |           |            |
| 6              | Race/Ethnicity |                  |              |            |              |           |             |           |            |
| 7              | Non-           | <i>consumer</i>  | 0            | 0          | 0            | -2        | 0           | 3         | 1          |
| 8              | Hispanic       | <i>behavior</i>  | (0 to 2)     | (-1 to 5)  | (-1 to 1)    | (-7 to 5) | (0 to 1)    | (0 to 8)  | (0 to 4)   |
| 9              | White          |                  |              |            |              |           |             |           |            |
| 10             |                | <i>+industry</i> | 0            | 1          | 0            | 0         | 1           | 4         | 2          |
| 11             |                | <i>response</i>  | (0 to 3)     | (0 to 9)   | (-1 to 2)    | (-5 to 9) | (0 to 2)    | (1 to 10) | (1 to 4)   |
| 12             | Non-           | <i>consumer</i>  | 1            | 1          | 0            | 0         | 1           | 0         | 0          |
| 13             | Hispanic Black | <i>behavior</i>  | (0 to 5)     | (-2 to 7)  | (0 to 1)     | (0 to 2)  | (0 to 2)    | (0 to 1)  | (0 to 1)   |
| 14             |                | <i>+industry</i> | 2            | 2          | 0            | 0         | 1           | 0         | 0          |
| 15             |                | <i>response</i>  | (0 to 7)     | (-1 to 10) | (0 to 2)     | (0 to 2)  | (0 to 2)    | (0 to 1)  | (0 to 1)   |
| 16             | Hispanic       | <i>consumer</i>  | 3            | 1          | 1            | 2         | 0           | 1         | 0          |
| 17             |                | <i>behavior</i>  | (0 to 10)    | (0 to 9)   | (0 to 3)     | (0 to 5)  | (0 to 1)    | (0 to 2)  | (0 to 1)   |
| 18             |                | <i>+industry</i> | 5            | 2          | 1            | 2         | 0           | 1         | 1          |
| 19             |                | <i>response</i>  | (1 to 14)    | (0 to 12)  | (0 to 4)     | (1 to 7)  | (0 to 1)    | (0 to 3)  | (0 to 2)   |
| 20             | Other          | <i>consumer</i>  | 0            | 0          | 0            | 0         | 0           | 0         | 0          |
| 21             |                | <i>behavior</i>  | 0            | (-1 to 3)  | (0 to 1)     | (-1 to 1) | (0 to 1)    | (0 to 1)  | 0          |
| 22             |                | <i>+industry</i> | 0            | 0          | 0            | 0         | 0           | 0         | 0          |
| 23             |                | <i>response</i>  | 0            | (0 to 4)   | (0 to 1)     | (-1 to 2) | (0 to 1)    | (0 to 1)  | 0          |

1. Values are the median estimates (95% uncertainty intervals) of each distribution of 1000 simulations.

**Supplementary Table 12.** Estimated health gains and costs associated with the federal menu calorie labeling on reducing cancer burdens in the US over a lifetime, one-way sensitivity analyses at 25% and 75% calorie compensation outside restaurant settings (US population=235,162,844)<sup>1</sup>

|                                             | Menu Calorie Labeling Policy                |                                                                    |                                             |                                                                    |
|---------------------------------------------|---------------------------------------------|--------------------------------------------------------------------|---------------------------------------------|--------------------------------------------------------------------|
|                                             | 75% Compensation                            |                                                                    | 25% Compensation                            |                                                                    |
|                                             | Consumer Behavior<br>Median (2.5% to 97.5%) | Consumer Behavior +<br>Industry Response<br>Median (2.5% to 97.5%) | Consumer Behavior<br>Median (2.5% to 97.5%) | Consumer Behavior +<br>Industry Response<br>Median (2.5% to 97.5%) |
| <b>New Cancer Cases Averted, N (95% UI)</b> |                                             |                                                                    |                                             |                                                                    |
| Liver cancer                                | 2550 (265 to 5030)                          | 4280 (2000 to 6770)                                                | 7760 (5160 to 10500)                        | 12800 (9790 to 16000)                                              |
| Endometrial cancer                          | 2490 (-633 to 5890)                         | 4640 (1570 to 8070)                                                | 8890 (5500 to 12700)                        | 15100 (11800 to 19100)                                             |
| Kidney cancer                               | 2360 (65 to 4510)                           | 4160 (1900 to 6410)                                                | 7810 (5230 to 10000)                        | 13000 (10400 to 15300)                                             |
| Breast cancer (postmenopausal)              | 2060 (-616 to 5280)                         | 3930 (1260 to 7200)                                                | 7640 (4560 to 11400)                        | 13000 (9700 to 17200)                                              |
| Pancreatic cancer                           | 638 (51 to 1280)                            | 1140 (536 to 1800)                                                 | 2140 (1490 to 2890)                         | 3590 (2840 to 4460)                                                |
| Esophageal adenocarcinoma                   | 598 (-239 to 1400)                          | 1100 (262 to 1930)                                                 | 2130 (1200 to 3000)                         | 3560 (2600 to 4520)                                                |
| Colorectal cancer                           | 480 (56 to 940)                             | 851 (423 to 1330)                                                  | 1600 (1060 to 2140)                         | 2660 (2030 to 3310)                                                |
| Multiple myeloma                            | 343 (61 to 674)                             | 576 (281 to 950)                                                   | 1050 (677 to 1480)                          | 1730 (1240 to 2340)                                                |
| Stomach cancer (cardia)                     | 312 (-42 to 736)                            | 533 (192 to 998)                                                   | 994 (555 to 1530)                           | 1640 (1060 to 2300)                                                |
| Thyroid cancer                              | 185 (-70 to 498)                            | 406 (128 to 749)                                                   | 851 (473 to 1310)                           | 1470 (963 to 2100)                                                 |
| Gallbladder cancer                          | 165 (70 to 274)                             | 266 (167 to 378)                                                   | 468 (348 to 602)                            | 758 (626 to 912)                                                   |
| Advanced prostate cancer                    | 162 (-28 to 360)                            | 282 (87 to 493)                                                    | 519 (304 to 768)                            | 868 (603 to 1160)                                                  |
| Ovarian cancer                              | 65 (-17 to 179)                             | 119 (26 to 245)                                                    | 228 (96 to 398)                             | 384 (196 to 617)                                                   |
| Total                                       | 12700 (2430 to 24200)                       | 22600 (12400 to 34100)                                             | 42800 (30400 to 53900)                      | 71500 (59100 to 82800)                                             |
| <b>Cancer Deaths Prevented, N (95% UI)</b>  |                                             |                                                                    |                                             |                                                                    |
| Liver cancer                                | 2200 (199 to 4450)                          | 3750 (1720 to 5970)                                                | 6790 (4490 to 9270)                         | 11200 (8570 to 14100)                                              |
| Breast cancer (postmenopausal)              | 1140 (-958 to 3640)                         | 2420 (281 to 4990)                                                 | 4980 (2540 to 7860)                         | 8670 (6030 to 12000)                                               |
| Endometrial cancer                          | 980 (-69 to 2030)                           | 1710 (675 to 2770)                                                 | 3160 (2020 to 4450)                         | 5270 (4120 to 6630)                                                |
| Kidney cancer                               | 939 (94 to 1820)                            | 1630 (795 to 2520)                                                 | 3020 (2080 to 3930)                         | 4990 (4020 to 6020)                                                |
| Pancreatic cancer                           | 561 (54 to 1120)                            | 996 (473 to 1590)                                                  | 1870 (1300 to 2510)                         | 3130 (2480 to 3890)                                                |
| Esophageal adenocarcinoma                   | 503 (-224 to 1190)                          | 932 (203 to 1640)                                                  | 1820 (1010 to 2580)                         | 3050 (2220 to 3890)                                                |
| Colorectal cancer                           | 323 (41 to 640)                             | 571 (280 to 910)                                                   | 1080 (724 to 1440)                          | 1800 (1390 to 2240)                                                |
| Stomach cancer (cardia)                     | 264 (-32 to 623)                            | 446 (159 to 838)                                                   | 824 (454 to 1280)                           | 1360 (887 to 1910)                                                 |
| Multiple myeloma                            | 213 (45 to 411)                             | 350 (178 to 576)                                                   | 635 (419 to 897)                            | 1040 (757 to 1370)                                                 |
| Gallbladder cancer                          | 141 (60 to 234)                             | 226 (142 to 320)                                                   | 398 (300 to 512)                            | 644 (531 to 777)                                                   |
| Advanced prostate cancer                    | 80 (-12 to 179)                             | 135 (44 to 239)                                                    | 246 (144 to 373)                            | 410 (278 to 563)                                                   |
| Ovarian cancer                              | 49 (-7 to 123)                              | 87 (26 to 170)                                                     | 162 (76 to 270)                             | 272 (155 to 415)                                                   |
| Thyroid cancer                              | 11 (1 to 24)                                | 19 (8 to 33)                                                       | 34 (21 to 53)                               | 56 (39.9 to 81.8)                                                  |
| Total                                       | 7760 (1280 to 13900)                        | 13600 (7160 to 20100)                                              | 25600 (17900 to 32300)                      | 42500 (34600 to 49600)                                             |
| <b>Life Years Gained</b>                    | 34700 (5070 to 66300)                       | 62200 (32500 to 93500)                                             | 118000 (82400 to 151000)                    | 197000 (161000 to 232000)                                          |

|    |                                                                                  |                        |                         |                           |                           |
|----|----------------------------------------------------------------------------------|------------------------|-------------------------|---------------------------|---------------------------|
| 1  |                                                                                  |                        |                         |                           |                           |
| 2  |                                                                                  |                        |                         |                           |                           |
| 3  | <b>QALYs Gained</b>                                                              | 51400 (9690 to 95700)  | 90500 (49300 to 135000) | 171000 (119000 to 218000) | 284000 (234000 to 334000) |
| 4  | <b>Changes in Health-Related Costs, Cancer Only (\$, millions)<sup>2,3</sup></b> |                        |                         |                           |                           |
| 5  | Healthcare (medical) cost                                                        | -693 (-1250 to -138)   | -1210 (-1770 to -660)   | -2270 (-2850 to -1640)    | -3760 (-4360 to -3140)    |
| 6  | Patient time cost                                                                | -47.9 (-90.0 to -11.9) | -83.6 (-126 to -47.3)   | -155 (-198 to -113)       | -258 (-302 to -215)       |
| 7  | Productivity loss                                                                | -279 (-527 to -56.6)   | -490 (-743 to -271)     | -929 (-1170 to -673)      | -1550 (-1800 to -1290)    |
| 8  | <b>Policy Implementation Costs (\$, millions)<sup>2,3</sup></b>                  |                        |                         |                           |                           |
| 9  | Government cost                                                                  | 18.5 (14.5 to 25.1)    | 18.5 (14.4 to 25.5)     | 18.5 (14.5 to 25.1)       | 18.5 (14.4 to 25.5)       |
| 10 | Administration                                                                   | 9.07 (8.61 to 9.56)    | 9.09 (8.62 to 9.55)     | 9.07 (8.61 to 9.56)       | 9.09 (8.62 to 9.55)       |
| 11 | Monitoring                                                                       | 9.40 (5.45 to 16.1)    | 9.38 (5.30 to 16.3)     | 9.40 (5.45 to 16.1)       | 9.38 (5.30 to 16.3)       |
| 12 | Industry cost                                                                    | 820 (762 to 889)       | 1120 (1040 to 1210)     | 820 (762 to 889)          | 1120 (1040 to 1210)       |
| 13 | Compliance                                                                       | 820 (762 to 889)       | 823 (757 to 889)        | 820 (762 to 889)          | 823 (757 to 889)          |
| 14 | Reformulation                                                                    | -----                  | 296 (249 to 353)        | -----                     | 296 (249 to 353)          |
| 15 | <b>Net Costs, Cancer Only (\$, millions)<sup>2,3,4</sup></b>                     |                        |                         |                           |                           |
| 16 | Societal perspective                                                             | -174 (-1032 to 639)    | -653 (-1510 to 164)     | -2520 (-3390 to -1590)    | -4430 (-5310 to -3510)    |
| 17 | Healthcare perspective                                                           | -674 (-1229 to -120)   | -1190 (-1750 to -639)   | -2250 (-2830 to -1620)    | -3740 (-4350 to -3120)    |
| 18 | <b>ICER (dollars/QALY)<sup>5</sup></b>                                           |                        |                         |                           |                           |
| 19 | Societal perspective                                                             | Dominant               | Dominant                | Dominant                  | Dominant                  |
| 20 | Healthcare perspective                                                           | Dominant               | Dominant                | Dominant                  | Dominant                  |

Abbreviations: ICER, Incremental Cost-Effectiveness Ratio; QALY, quality-adjusted life years.

1. Values are the median estimates (95% uncertainty intervals) of each distribution of 1000 simulations.

2. Health-related costs were inflated to 2015 US dollars using the Personal Health Care (PHC) index. Policy intervention costs were inflated to 2015 US dollars using the Consumer Price Index. Negative costs represent savings.

3. Costs are medians from 1000 simulations so may not add up to totals.

4. Net costs were calculated as policy costs minus health-related costs from reduced cancer burden. Societal perspective includes healthcare cost, patient time costs, productivity costs, and policy implementation costs; government perspective included policy costs relevant to policy implementation and program monitoring and evaluation and medical costs.

5. ICER threshold was evaluated at \$150,000/QALY. Dominant represents less costly and more effective than the "no-policy intervention" scenario.

**Supplementary Table 13.** Estimated health gains and costs associated with the federal menu calorie labeling on reducing cancer burdens in the US over a lifetime, one-way sensitivity analysis, assuming all full-service and fast-food restaurants were covered by the policy (US population=235,162,844)<sup>1</sup>

|                                                                                  | Menu Calorie Labeling Policy                |                                                                 |
|----------------------------------------------------------------------------------|---------------------------------------------|-----------------------------------------------------------------|
|                                                                                  | Consumer Behavior<br>Median (2.5% to 97.5%) | Consumer Behavior + Industry Response<br>Median (2.5% to 97.5%) |
| <b>New Cancer Cases Averted, N (95% UI)</b>                                      |                                             |                                                                 |
| Liver cancer                                                                     | 7280 (4690 to 10100)                        | 11400 (8480 to 14400)                                           |
| Kidney cancer                                                                    | 6820 (4180 to 9460)                         | 11100 (8470 to 13700)                                           |
| Endometrial cancer                                                               | 5340 (1540 to 9220)                         | 10400 (6690 to 14300)                                           |
| Breast cancer (postmenopausal)                                                   | 4920 (1580 to 8420)                         | 9380 (5960 to 13100)                                            |
| Esophageal adenocarcinoma                                                        | 2060 (1170 to 3060)                         | 3260 (2310 to 4330)                                             |
| Pancreatic cancer                                                                | 1810 (1150 to 2600)                         | 3000 (2290 to 3870)                                             |
| Colorectal cancer                                                                | 1320 (772 to 1910)                          | 2200 (1600 to 2880)                                             |
| Stomach cancer (cardia)                                                          | 938 (531 to 1510)                           | 1480 (985 to 2140)                                              |
| Thyroid cancer                                                                   | 746 (430 to 1180)                           | 1270 (850 to 1820)                                              |
| Multiple myeloma                                                                 | 710 (377 to 1150)                           | 1270 (879 to 1820)                                              |
| Advanced prostate cancer                                                         | 430 (208 to 681)                            | 715 (461 to 1010)                                               |
| Gallbladder cancer                                                               | 329 (201 to 457)                            | 568 (435 to 708)                                                |
| Ovarian cancer                                                                   | 133 (20.9 to 292)                           | 263 (109 to 468)                                                |
| Total                                                                            | 32900 (20300 to 46000)                      | 56400 (43700 to 69300)                                          |
| <b>Cancer Deaths Prevented, N (95% UI)</b>                                       |                                             |                                                                 |
| Liver cancer                                                                     | 6460 (4170 to 8980)                         | 10000 (7480 to 12800)                                           |
| Breast cancer (postmenopausal)                                                   | 3410 (701 to 6280)                          | 6440 (3560 to 9750)                                             |
| Kidney cancer                                                                    | 2620 (1610 to 3620)                         | 4250 (3210 to 5300)                                             |
| Endometrial cancer                                                               | 1890 (654 to 3140)                          | 3610 (2390 to 4900)                                             |
| Esophageal adenocarcinoma                                                        | 1800 (1030 to 2670)                         | 2840 (2010 to 3750)                                             |
| Pancreatic cancer                                                                | 1580 (976 to 2250)                          | 2620 (1990 to 3380)                                             |
| Colorectal cancer                                                                | 923 (560 to 1310)                           | 1520 (1110 to 1970)                                             |
| Stomach cancer (cardia)                                                          | 785 (437 to 1270)                           | 1240 (812 to 1790)                                              |
| Multiple myeloma                                                                 | 431 (234 to 709)                            | 762 (524 to 1100)                                               |
| Gallbladder cancer                                                               | 275 (170 to 385)                            | 479 (366 to 601)                                                |
| Advanced prostate cancer                                                         | 219 (117 to 351)                            | 353 (233 to 506)                                                |
| Ovarian cancer                                                                   | 94 (18 to 197)                              | 185 (91 to 317)                                                 |
| Thyroid cancer                                                                   | 27 (13 to 45)                               | 45 (28 to 68)                                                   |
| Total                                                                            | 7760 (1280 to 13900)                        | 34400 (26800 to 42400)                                          |
| <b>Life Years Gained</b>                                                         | 97300 (62300 to 135000)                     | 162000 (126000 to 201000)                                       |
| <b>QALYs Gained</b>                                                              | 20500 (13100 to 28500)                      | 230000 (178000 to 287000)                                       |
| <b>Changes in Health-Related Costs, Cancer Only (\$, millions)<sup>2,3</sup></b> |                                             |                                                                 |

1  
2  
3  
4  
5  
6  
7  
8  
9  
10  
11  
12  
13  
14  
15  
16  
17  
18  
19  
20  
21  
22  
23  
24  
25  
26  
27  
28  
29  
30  
31  
32  
33  
34  
35  
36  
37  
38  
39  
40  
41  
42  
43  
44  
45  
46  
47

|                                                                 |                        |                        |
|-----------------------------------------------------------------|------------------------|------------------------|
| Healthcare (medical) cost                                       | -1820 (-2500 to -1180) | -3060 (-3740 to -2400) |
| Patient time cost                                               | -112 (-160 to -62.7)   | -197 (-245 to -148)    |
| Productivity loss                                               | -692 (-976 to -401)    | -1210 (-1490 to -916)  |
| <b>Policy Implementation Costs (\$, millions)<sup>2,3</sup></b> |                        |                        |
| Government cost                                                 | 18.4 (14.7 to 25.7)    | 18.4 (14.7 to 25.7)    |
| Administration                                                  | 9.06 (8.56 to 9.52)    | 9.07 (8.60 to 9.56)    |
| Monitoring                                                      | 9.32 (5.61 to 16.5)    | 9.37 (5.64 to 16.6)    |
| Industry cost                                                   | 821 (764 to 888)       | 1120 (1040 to 1200)    |
| Compliance                                                      | 821 (764 to 888)       | 821 (763 to 886)       |
| Reformulation                                                   | -----                  | 297 (248 to 350)       |
| <b>Net Costs, Cancer Only (\$, millions)<sup>2,3,4</sup></b>    |                        |                        |
| Societal perspective                                            | -1780 (-2790 to -831)  | -1030 (-1590 to -549)  |
| Healthcare perspective                                          | -1800 (-2470 to -1160) | -1670 (-2120 to -1270) |
| <b>ICER (dollars/QALY)<sup>5</sup></b>                          |                        |                        |
| Societal perspective                                            | Dominant               | Dominant               |
| Healthcare perspective                                          | Dominant               | Dominant               |

Abbreviations: ICER, Incremental Cost-Effectiveness Ratio; QALY, quality-adjusted life years.

1. Values are the median estimates (95% uncertainty intervals) of each distribution of 1000 simulations.
2. Health-related costs were inflated to 2015 US dollars using the Personal Health Care (PHC) index. Policy intervention costs were inflated to 2015 US dollars using the Consumer Price Index. Negative costs represent savings.
3. Costs are medians from 1000 simulations so may not add up to totals.
4. Net costs were calculated as policy costs minus health-related costs from reduced cancer burden. Societal perspective includes healthcare cost, patient time costs, productivity costs, and policy implementation costs; government perspective included policy costs relevant to policy implementation and program monitoring and evaluation and medical costs.
5. ICER threshold was evaluated at \$150,000/QALY. Dominant represents less costly and more effective than the "no-policy intervention" scenario.



**Supplementary Figure 1. Diet and Cancer Outcome Model (DiCOM)**

The model consists of four general health states: (a) healthy without cancer (healthy state); (b) initial cancer diagnosis (initial state) for each cancer type  $i$ ; (c) continuing care (continuing state) for each cancer type  $i$ ; and (d) death state. Transitions between states are based on national cancer incidence and cancer-specific mortality rates from SEER (for individual with cancer) and lifetable-based mortality rates (for individuals without cancer). The model simulates the policy impact on the number of new cases and deaths of 13 obesity-associated cancers, health-related quality of life (HRQOL), and health-related costs among U.S. adults over a lifetime by comparing a policy scenario (menu calorie label) to a non-policy scenario (status quo).

1  
2  
3  
4  
5  
6  
7  
8  
9  
10  
11  
12  
13  
14  
15  
16  
17  
18  
19  
20  
21  
22  
23  
24  
25  
26  
27  
28  
29  
30  
31  
32  
33  
34  
35  
36  
37  
38  
39  
40  
41  
42  
43  
44  
45  
46  
47



**Supplementary Figure 2.** Estimated reduced new cancer cases and deaths associated with the federal menu calorie labeling in the US by age, sex, race/ethnicity, and cancer type, over lifetime



**Supplementary Figure 3.** Estimated life years and QALYs gained associated with the federal menu calorie labeling in the US by age, sex, and race/ethnicity, over a lifetime



1  
2  
3  
4  
5  
6  
7  
8  
9  
10  
11  
12  
13  
14  
15  
16  
17  
18  
19  
20  
21  
22  
23  
24  
25  
26  
27  
28  
29  
30  
31  
32  
33  
34  
35  
36  
37  
38  
39  
40  
41  
42  
43  
44  
45  
46  
47  
48  
49  
50  
51  
52  
53  
54  
55  
56  
57  
58  
59  
60

**Consumer Behavior**



**Consumer Behavior + Industry Response**



(A)

1  
2  
3  
4  
5  
6  
7  
8  
9  
10  
11  
12  
13  
14  
15  
16  
17  
18  
19  
20  
21  
22  
23  
24  
25  
26  
27  
28  
29  
30  
31  
32  
33  
34  
35  
36  
37  
38  
39  
40  
41  
42  
43  
44  
45  
46  
47  
48  
49  
50  
51  
52  
53  
54  
55  
56  
57  
58  
59  
60





**Supplementary Figure 4.** Estimated changes of health-related costs associated with the federal menu calorie labeling in the US by age, sex, race/ethnicity, and cancer type, over lifetime

Net Costs (\$ millions)



**Supplementary Figure 5.** Estimated net costs from societal and government perspectives associated with the federal menu calorie labeling policy in the US by age, sex, and race/ethnicity, over a lifetime



**Supplementary Figure 6.** One-Way Sensitivity Analysis of Net Costs of Menu Calorie Labeling and Obesity-Associated Cancer Rates by Varying Assumptions of Key Input Parameters From (A) Societal Perspective and (B) Healthcare Perspective

1a) assumed that only 25% of calorie reduction as a result of industry response would translate into long-term reductions in daily calories; 1b) assumed that only 75% of calorie reduction as a result of industry response would translate into long-term reductions in daily calories; 2a) weaker diet-BMI association assumed half of the base-case diet-BMI association; 2b) stronger diet-BMI association assumed two times of the base-case diet-BMI association; 3) 2% annual increase in medical expenditure on cancer care; 4a) lower discounting rate assumed 0% discounting rate; 4b) higher discounting rate assumed 5% discounting rate; and 5) assumed the coverage of the FDA's final rule increasing from 56.5% to 100% of the calories from full-service restaurants. Under base-case scenario (policy effect assumed consumer behavior: -7.3%, and industry reformulation: -5.0%; assumed that only 50% of calorie reduction as a result of industry response would translate into long-term reductions in daily calories; diet-BMI association assumed healthy-weight: 0.0015 kg/m<sup>2</sup> per kcal, and overweight/obese: 0.003 kg/m<sup>2</sup> per kcal; medical expenditure on cancer care assumed 0% annual increase; discounting rate assumed 3%; policy coverage would affect 56.5% of calories consumed at full-service restaurants and 100% of calories consumed at fast-food restaurants), the policy was cost-saving from both societal and healthcare perspectives. The policy remained cost-saving for all sensitivity analyses from the healthcare perspective and from societal perspective with additional industry reformulation. With consumer behavior alone, the policy was cost-saving under all scenarios.

**CHEERS Checklist**

**Items to include when reporting economic evaluations of health interventions**

The **ISPOR CHEERS Task Force Report**, *Consolidated Health Economic Evaluation Reporting Standards (CHEERS)—Explanation and Elaboration: A Report of the ISPOR Health Economic Evaluations Publication Guidelines Good Reporting Practices Task Force*, provides examples and further discussion of the 24-item CHEERS Checklist and the CHEERS Statement. It may be accessed via the *Value in Health* or via the ISPOR Health Economic Evaluation Publication Guidelines – CHEERS: Good Reporting Practices webpage: <http://www.ispor.org/TaskForces/EconomicPubGuidelines.asp>

| Section/item                    | Item No | Recommendation                                                                                                                                                                             | Reported on page No/line No  |
|---------------------------------|---------|--------------------------------------------------------------------------------------------------------------------------------------------------------------------------------------------|------------------------------|
| <b>Title and abstract</b>       |         |                                                                                                                                                                                            |                              |
| Title                           | 1       | Identify the study as an economic evaluation or use more specific terms such as “cost-effectiveness analysis”, and describe the interventions compared.                                    | Page 1/Lines 1-2             |
| Abstract                        | 2       | Provide a structured summary of objectives, perspective, setting, methods (including study design and inputs), results (including base case and uncertainty analyses), and conclusions.    | Pages 3-4/<br>Lines 32-59    |
| <b>Introduction</b>             |         |                                                                                                                                                                                            |                              |
| Background and objectives       | 3       | Provide an explicit statement of the broader context for the study.<br>Present the study question and its relevance for health policy or practice decisions.                               | Pages 5-6/<br>Lines 64-92    |
| <b>Methods</b>                  |         |                                                                                                                                                                                            |                              |
| Target population and subgroups | 4       | Describe characteristics of the base case population and subgroups analysed, including why they were chosen.                                                                               | Page 9/<br>Lines 106-113     |
| Setting and location            | 5       | State relevant aspects of the system(s) in which the decision(s) need(s) to be made.                                                                                                       | Page 6/Lines 96-98           |
| Study perspective               | 6       | Describe the perspective of the study and relate this to the costs being evaluated.                                                                                                        | Page 12/<br>Lines 189-197    |
| Comparators                     | 7       | Describe the interventions or strategies being compared and state why they were chosen.                                                                                                    | Pages 9-10/<br>Lines 125-140 |
| Time horizon                    | 8       | State the time horizon(s) over which costs and consequences are being evaluated and say why appropriate.                                                                                   | Page 6/<br>Lines 98-99       |
| Discount rate                   | 9       | Report the choice of discount rate(s) used for costs and outcomes and say why appropriate.                                                                                                 | Page 12<br>/Line 198         |
| Choice of health outcomes       | 10      | Describe what outcomes were used as the measure(s) of benefit in the evaluation and their relevance for the type of analysis performed.                                                    | Page 11/<br>Lines 158-170    |
| Measurement of effectiveness    | 11a     | <i>Single study-based estimates:</i> Describe fully the design features of the single effectiveness study and why the single study was a sufficient source of clinical effectiveness data. |                              |



|    |                         |     |                                                                                                                                                                                                                                                                                                                                                       |                                                                                      |
|----|-------------------------|-----|-------------------------------------------------------------------------------------------------------------------------------------------------------------------------------------------------------------------------------------------------------------------------------------------------------------------------------------------------------|--------------------------------------------------------------------------------------|
| 1  |                         | 11b | <i>Synthesis-based estimates</i> : Describe fully the methods used for identification of included studies and synthesis of clinical effectiveness data.                                                                                                                                                                                               | Pages 9-11/<br>Lines 115-170                                                         |
| 2  |                         |     |                                                                                                                                                                                                                                                                                                                                                       |                                                                                      |
| 3  |                         |     |                                                                                                                                                                                                                                                                                                                                                       |                                                                                      |
| 4  | Measurement and         | 12  | If applicable, describe the population and methods used to elicit preferences for outcomes.                                                                                                                                                                                                                                                           |                                                                                      |
| 5  | valuation of preference |     |                                                                                                                                                                                                                                                                                                                                                       |                                                                                      |
| 6  | based outcomes          |     |                                                                                                                                                                                                                                                                                                                                                       |                                                                                      |
| 7  | Estimating resources    | 13a | <i>Single study-based economic evaluation</i> : Describe approaches used to estimate resource use associated with the alternative interventions. Describe primary or secondary research methods for valuing each resource item in terms of its unit cost. Describe any adjustments made to approximate to opportunity costs.                          |                                                                                      |
| 8  | and costs               |     |                                                                                                                                                                                                                                                                                                                                                       |                                                                                      |
| 9  |                         |     |                                                                                                                                                                                                                                                                                                                                                       |                                                                                      |
| 10 |                         |     |                                                                                                                                                                                                                                                                                                                                                       |                                                                                      |
| 11 |                         |     |                                                                                                                                                                                                                                                                                                                                                       |                                                                                      |
| 12 |                         |     |                                                                                                                                                                                                                                                                                                                                                       |                                                                                      |
| 13 |                         |     |                                                                                                                                                                                                                                                                                                                                                       |                                                                                      |
| 14 |                         |     |                                                                                                                                                                                                                                                                                                                                                       |                                                                                      |
| 15 |                         | 13b | <i>Model-based economic evaluation</i> : Describe approaches and data sources used to estimate resource use associated with model health states. Describe primary or secondary research methods for valuing each resource item in terms of its unit cost. Describe any adjustments made to approximate to opportunity costs.                          | Page 11/<br>Lines 168-170                                                            |
| 16 |                         |     |                                                                                                                                                                                                                                                                                                                                                       |                                                                                      |
| 17 |                         |     |                                                                                                                                                                                                                                                                                                                                                       |                                                                                      |
| 18 |                         |     |                                                                                                                                                                                                                                                                                                                                                       |                                                                                      |
| 19 |                         |     |                                                                                                                                                                                                                                                                                                                                                       |                                                                                      |
| 20 |                         |     |                                                                                                                                                                                                                                                                                                                                                       |                                                                                      |
| 21 |                         |     |                                                                                                                                                                                                                                                                                                                                                       |                                                                                      |
| 22 | Currency, price date,   | 14  | Report the dates of the estimated resource quantities and unit costs. Describe methods for adjusting estimated unit costs to the year of reported costs if necessary. Describe methods for converting costs into a common currency base and the exchange rate.                                                                                        | Page 12/Line 197-198                                                                 |
| 23 | and conversion          |     |                                                                                                                                                                                                                                                                                                                                                       |                                                                                      |
| 24 |                         |     |                                                                                                                                                                                                                                                                                                                                                       |                                                                                      |
| 25 |                         |     |                                                                                                                                                                                                                                                                                                                                                       |                                                                                      |
| 26 |                         |     |                                                                                                                                                                                                                                                                                                                                                       |                                                                                      |
| 27 |                         |     |                                                                                                                                                                                                                                                                                                                                                       |                                                                                      |
| 28 | Choice of model         | 15  | Describe and give reasons for the specific type of decision-analytical model used. Providing a figure to show model structure is strongly recommended.                                                                                                                                                                                                | Supplementary Figure 1<br>Pages 9-10/<br>Lines 118-120, 128-129,<br>135-140, 145-152 |
| 29 |                         |     |                                                                                                                                                                                                                                                                                                                                                       |                                                                                      |
| 30 |                         |     |                                                                                                                                                                                                                                                                                                                                                       |                                                                                      |
| 31 | Assumptions             | 16  | Describe all structural or other assumptions underpinning the decision-analytical model.                                                                                                                                                                                                                                                              |                                                                                      |
| 32 |                         |     |                                                                                                                                                                                                                                                                                                                                                       |                                                                                      |
| 33 | Analytical methods      | 17  | Describe all analytical methods supporting the evaluation. This could include methods for dealing with skewed, missing, or censored data; extrapolation methods; methods for pooling data; approaches to validate or make adjustments (such as half cycle corrections) to a model; and methods for handling population heterogeneity and uncertainty. | Page 13/<br>Lines 210-214                                                            |
| 34 |                         |     |                                                                                                                                                                                                                                                                                                                                                       |                                                                                      |
| 35 |                         |     |                                                                                                                                                                                                                                                                                                                                                       |                                                                                      |
| 36 |                         |     |                                                                                                                                                                                                                                                                                                                                                       |                                                                                      |
| 37 |                         |     |                                                                                                                                                                                                                                                                                                                                                       |                                                                                      |
| 38 |                         |     |                                                                                                                                                                                                                                                                                                                                                       |                                                                                      |
| 39 |                         |     |                                                                                                                                                                                                                                                                                                                                                       |                                                                                      |
| 40 |                         |     |                                                                                                                                                                                                                                                                                                                                                       |                                                                                      |
| 41 | <b>Results</b>          |     |                                                                                                                                                                                                                                                                                                                                                       |                                                                                      |
| 42 | Study parameters        | 18  | Report the values, ranges, references, and, if used, probability distributions for all parameters. Report reasons or sources for distributions used to represent uncertainty where appropriate. Providing a table to show the input values is strongly recommended.                                                                                   | Pages 7-8/Table 1                                                                    |
| 43 |                         |     |                                                                                                                                                                                                                                                                                                                                                       |                                                                                      |
| 44 |                         |     |                                                                                                                                                                                                                                                                                                                                                       |                                                                                      |
| 45 |                         |     |                                                                                                                                                                                                                                                                                                                                                       |                                                                                      |
| 46 |                         |     |                                                                                                                                                                                                                                                                                                                                                       |                                                                                      |
| 47 |                         |     |                                                                                                                                                                                                                                                                                                                                                       |                                                                                      |
| 48 | Incremental costs and   | 19  | For each intervention, report mean values for the main categories of estimated costs and outcomes of interest, as well as mean differences between the comparator groups. If applicable, report incremental cost-effectiveness ratios.                                                                                                                | Pages 16-17/<br>Table 2                                                              |
| 49 | outcomes                |     |                                                                                                                                                                                                                                                                                                                                                       |                                                                                      |
| 50 |                         |     |                                                                                                                                                                                                                                                                                                                                                       |                                                                                      |
| 51 |                         |     |                                                                                                                                                                                                                                                                                                                                                       |                                                                                      |
| 52 |                         |     |                                                                                                                                                                                                                                                                                                                                                       |                                                                                      |
| 53 | Characterising          | 20a | <i>Single study-based economic evaluation</i> : Describe the effects of sampling uncertainty for the estimated incremental cost and                                                                                                                                                                                                                   |                                                                                      |
| 54 | uncertainty             |     |                                                                                                                                                                                                                                                                                                                                                       |                                                                                      |
| 55 |                         |     |                                                                                                                                                                                                                                                                                                                                                       |                                                                                      |
| 56 |                         |     |                                                                                                                                                                                                                                                                                                                                                       |                                                                                      |
| 57 |                         |     |                                                                                                                                                                                                                                                                                                                                                       |                                                                                      |
| 58 |                         |     |                                                                                                                                                                                                                                                                                                                                                       |                                                                                      |
| 59 |                         |     |                                                                                                                                                                                                                                                                                                                                                       |                                                                                      |
| 60 |                         |     |                                                                                                                                                                                                                                                                                                                                                       |                                                                                      |

|    |                       |                                                                         |                               |
|----|-----------------------|-------------------------------------------------------------------------|-------------------------------|
| 1  |                       | incremental effectiveness parameters, together with the impact          |                               |
| 2  |                       | of methodological assumptions (such as discount rate, study             |                               |
| 3  |                       | perspective).                                                           |                               |
| 4  |                       |                                                                         |                               |
| 5  | Characterising        | 20b <i>Model-based economic evaluation:</i> Describe the effects on the | Page 21/<br>Lines 282-295     |
| 6  | heterogeneity         | results of uncertainty for all input parameters, and uncertainty        |                               |
| 7  |                       | related to the structure of the model and assumptions.                  |                               |
| 8  |                       | 21 If applicable, report differences in costs, outcomes, or cost-       |                               |
| 9  |                       | effectiveness that can be explained by variations between               |                               |
| 10 |                       | subgroups of patients with different baseline characteristics or        | Pages 18-19/<br>Lines 267-281 |
| 11 |                       | other observed variability in effects that are not reducible by         |                               |
| 12 |                       | more information.                                                       |                               |
| 13 | <b>Discussion</b>     |                                                                         |                               |
| 14 | Study findings,       |                                                                         |                               |
| 15 | limitations,          | 22 Summarise key study findings and describe how they support           |                               |
| 16 | generalisability, and | the conclusions reached. Discuss limitations and the                    |                               |
| 17 | current knowledge     | generalisability of the findings and how the findings fit with          | Pages 21-24                   |
| 18 |                       | current knowledge.                                                      |                               |
| 19 | <b>Other</b>          |                                                                         |                               |
| 20 | Source of funding     | 23 Describe how the study was funded and the role of the funder         |                               |
| 21 |                       | in the identification, design, conduct, and reporting of the            |                               |
| 22 |                       | analysis. Describe other non-monetary sources of support.               | Page 26                       |
| 23 |                       |                                                                         |                               |
| 24 | Conflicts of interest | 24 Describe any potential for conflict of interest of study             |                               |
| 25 |                       | contributors in accordance with journal policy. In the absence          |                               |
| 26 |                       | of a journal policy, we recommend authors comply with                   | Pages 26-27                   |
| 27 |                       | International Committee of Medical Journal Editors                      |                               |
| 28 |                       | recommendations.                                                        |                               |
| 29 |                       |                                                                         |                               |

For consistency, the CHEERS Statement checklist format is based on the format of the CONSORT statement checklist

The **ISPOR CHEERS Task Force Report** provides examples and further discussion of the 24-item CHEERS Checklist and the CHEERS Statement. It may be accessed via the *Value in Health* link or via the ISPOR Health Economic Evaluation Publication Guidelines – CHEERS: Good Reporting Practices webpage: <http://www.ispor.org/TaskForces/EconomicPubGuidelines.asp>

The citation for the CHEERS Task Force Report is:

Husereau D, Drummond M, Petrou S, et al. Consolidated health economic evaluation reporting standards (CHEERS)—Explanation and elaboration: A report of the ISPOR health economic evaluations publication guidelines good reporting practices task force. *Value Health* 2013;16:231-50.



Supplement: bmjopen-2022-063614.draft_revisions.pdf [file bmjopen-2022-063614.draft_revisions.pdf]
