# Supplementary material for: What is the cost-effectiveness of menu calorie labelling on reducing obesity-associated cancer burdens? An economic evaluation of a federal policy intervention among 235 million adults in the USA
Source: PubMed Central journal article supplement — BMJ Open. 2023 Mar 9;13(4):e063614. doi: 10.1136/bmjopen-2022-063614 (PMC10186398; doi:10.1136/bmjopen-2022-063614), 2023-03-09
Supplement: bmjopen-2022-063614supp002.pdf [file bmjopen-2022-063614supp002.pdf]

**Title** Cost-Effectiveness Analysis of the Federal Menu Calorie Labeling and Obesity-Associated Cancer Burdens in the United States

**Supplementary Table 1.** Defining Population and 32 Subgroups

**Supplementary Table 2.** Relative Risk Estimates of Etiologic Relationships Between Body Mass Index (BMI) and 13 Types of Cancers

**Supplementary Table 3.** Baseline Incidence Rates of 13 Cancers among US Adults by 32 Subgroups

**Supplementary Table 4.** Baseline 5-year Relative Survival Rates of 13 Cancers among US Adults by 32 Subgroups

**Supplementary Table 5.** Health-Related Quality of Life Among US Cancer Patients Aged 20 Years or Older, by Cancer Type and Phase of Care

**Supplementary Table 6.** Baseline Medical Costs, Productivity Loss, and Patient Time Costs Among US Cancer Patients Aged 20 Years or Older, by Cancer Type and Phase of Care

**Supplementary Table 7.** Baseline Medical Costs, Productivity Loss, and Patient Time Costs Among the General Population Aged 20 Years or Older in the US, by 32 Subgroups

**Supplementary Table 8.** Characteristics of US Adults Aged 20 Years or Older Participated in the NHANES, 2013-2016

**Supplementary Table 9.** Consumption of Calories from Full-Service and Fast-Food Restaurants among US Adults Participated in 2013-2016 NHANES, by 32 Subgroups

**Supplementary Table 10.** Estimated New Cancer Cases Averted by the Federal Menu Calorie Labeling in the US by Age, Sex, Race/Ethnicity, and Cancer Type, Over a Lifetime

**Supplementary Table 11.** Estimated Cancer Deaths Reduced by the Federal Menu Calorie Labeling in the US by Age, Sex, Race/Ethnicity, and Cancer Type, Over a Lifetime

**Supplementary Table 12.** Estimated Health Gains and Costs Associated with the Federal Menu Calorie Labeling on Reducing Cancer Burdens in the US Over a Lifetime, One-Way Sensitivity Analyses at 25% and 75% Calorie Compensations Outside the Restaurant Settings

**Supplementary Table 13.** Estimated Health Gains and Costs Associated with the Federal Menu Calorie Labeling on Reducing Cancer Burdens in the US Over a Lifetime, One-Way Sensitivity Analysis, Assuming all Full-Service and Fast-Food Restaurants were Covered by the Policy

**Supplementary Figure 1.** Diet and Cancer Outcome Model (DiCOM)

**Supplementary Figure 2.** Estimated Reduced New Cancer Cases and Deaths Associated with the Federal Menu Calorie Labeling in the US by Age, Sex, Race/Ethnicity, and Cancer Type, Over a Lifetime

**Supplementary Figure 3.** Estimated life Years and QALYs Gained Associated with the Federal Menu Calorie Labeling in the US by Age, Sex, and Race/Ethnicity, Over a Lifetime.

**Supplementary Figure 4.** Estimated Changes of Health-Related Costs Associated with the Federal Menu Calorie Labeling in the US by Age, Sex, Race/Ethnicity, and Cancer Type, Over a Lifetime

**Supplementary Figure 5.** Estimated Net Costs from Societal and Healthcare Perspectives Associated with the Federal Menu Calorie Labeling in the US by Age, Sex, and Race/Ethnicity, Over a Lifetime

**Supplementary Figure 6.** One-Way Sensitivity Analysis of Net Costs of the Federal Menu Calorie Labeling and Obesity-Associated Cancer Rates to Varying Assumptions of Key Input Parameters From (A) Societal Perspective and (B) Healthcare Perspective

**Supplementary Table 1.** Defining population and 32 subgroups

| <b>Subgroups</b> | <b>Age</b> | <b>Sex</b> | <b>Race/Ethnicity</b> |
|------------------|------------|------------|-----------------------|
| 1                | 20-44y     | Female     | NHW                   |
| 2                | 20-44y     | Female     | NHB                   |
| 3                | 20-44y     | Female     | HISP                  |
| 4                | 20-44y     | Female     | OTH                   |
| 5                | 20-44y     | Male       | NHW                   |
| 6                | 20-44y     | Male       | NHB                   |
| 7                | 20-44y     | Male       | HISP                  |
| 8                | 20-44y     | Male       | OTH                   |
| 9                | 45-54y     | Female     | NHW                   |
| 10               | 45-54y     | Female     | NHB                   |
| 11               | 45-54y     | Female     | HISP                  |
| 12               | 45-54y     | Female     | OTH                   |
| 13               | 45-54y     | Male       | NHW                   |
| 14               | 45-54y     | Male       | NHB                   |
| 15               | 45-54y     | Male       | HISP                  |
| 16               | 45-54y     | Male       | OTH                   |
| 17               | 55-64y     | Female     | NHW                   |
| 18               | 55-64y     | Female     | NHB                   |
| 19               | 55-64y     | Female     | HISP                  |
| 20               | 55-64y     | Female     | OTH                   |
| 21               | 55-64y     | Male       | NHW                   |
| 22               | 55-64y     | Male       | NHB                   |
| 23               | 55-64y     | Male       | HISP                  |
| 24               | 55-64y     | Male       | OTH                   |
| 25               | 65+y       | Female     | NHW                   |
| 26               | 65+y       | Female     | NHB                   |
| 27               | 65+y       | Female     | HISP                  |
| 28               | 65+y       | Female     | OTH                   |
| 29               | 65+y       | Male       | NHW                   |
| 30               | 65+y       | Male       | NHB                   |
| 31               | 65+y       | Male       | HISP                  |
| 32               | 65+y       | Male       | OTH                   |

**Supplementary Table 2.** Relative risk estimates of etiologic relationships between body mass index (BMI) and 13 types of cancers

| Cancer Type                 | No. of Studies | No. of Events | Source                   | Evidence Grading           | RR (95% CI)<br>Per 5 kg/m <sup>2</sup> | Statistical Heterogeneity         |
|-----------------------------|----------------|---------------|--------------------------|----------------------------|----------------------------------------|-----------------------------------|
| Endometrial                 | 26             | 18,717        | CUP, 2013                | Convincing<br>↑risk        | 1.50 (1.42-1.59)                       | I <sup>2</sup> =86.2%<br>P<0.0001 |
| Esophageal (adenocarcinoma) | 9              | 1,725         | CUP, 2016                | Convincing<br>↑risk        | 1.48 (1.35-1.62)                       | I <sup>2</sup> =36.7%<br>P=0.13   |
| Kidney                      | 23             | 15,575        | CUP, 2015                | Convincing<br>↑risk        | 1.30 (1.25-1.35)                       | I <sup>2</sup> =38.8%<br>P=0.03   |
| Liver                       | 12             | 14,311        | CUP, 2015                | Convincing<br>↑risk        | 1.30 (1.16-1.46)                       | I <sup>2</sup> =78.3%<br>P=0.000  |
| Gallbladder                 | 8              | 6,004         | CUP, 2015                | Probable<br>↑risk          | 1.25 (1.15-1.37)                       | I <sup>2</sup> =52.3%<br>P=0.04   |
| Stomach (cardia)            | 7              | 2,050         | CUP, 2016                | Probable<br>↑risk          | 1.23 (1.07-1.40)                       | I <sup>2</sup> =55.6%<br>P=0.04   |
| Breast (post-menopausal)    | 56             | 80,404        | CUP, 2017                | Convincing<br>↑risk        | 1.12 (1.09-1.15)                       | I <sup>2</sup> =75%<br>P<0.001    |
| Pancreas                    | 23             | 9,504         | CUP, 2011                | Convincing<br>↑risk        | 1.10 (1.07-1.14)                       | I <sup>2</sup> =19%<br>P=0.20     |
| Multiple myeloma            | 20             | 1,388         | IARC, 2016 <sup>30</sup> | Sufficient (IRAC)<br>↑risk | 1.09 (1.03-1.16)                       | Not reported                      |
| Prostate (advanced)         | 24             | 11,149        | CUP, 2014                | Probable<br>↑risk          | 1.08 (1.04-1.12)                       | I <sup>2</sup> =18.8%<br>P=0.21   |
| Thyroid                     | 22             | 3,100         | IARC, 2016 <sup>30</sup> | Sufficient (IARC)<br>↑risk | 1.06 (1.02-1.10)                       | Not reported                      |
| Ovary                       | 25             | 15,899        | CUP, 2013                | Probable<br>↑risk          | 1.06 (1.02-1.11)                       | I <sup>2</sup> =55.1%<br>P=0.001  |
| Colorectal                  | 38             | 71,089        | CUP, 2017                | Convincing<br>↑risk        | 1.05 (1.03-1.07)                       | I <sup>2</sup> =74.2%<br>P=0.000  |

Supplementary Table 3. Baseline incidence rates of 13 cancers among US adults by 32 subgroups

| Subgroup | Colorectal Cancer |       | Endometrial Cancer |      | Esophageal Adeno-carcinoma |      | Female Breast (Postmeno.) |       | Gallbladder Cancer |      | Kidney Cancer |      | Liver Cancer |      | Multiple Myeloma |      | Ovarian cancer |      | Pancreatic Cancer |      | Advanced Prostate Cancer |      | Stomach Cancer (Gastric Cardia) |      | Thyroid Cancer |      |
|----------|-------------------|-------|--------------------|------|----------------------------|------|---------------------------|-------|--------------------|------|---------------|------|--------------|------|------------------|------|----------------|------|-------------------|------|--------------------------|------|---------------------------------|------|----------------|------|
|          | Rate              | SE    | Rate               | SE   | Rate                       | SE   | Rate                      | SE    | Rate               | SE   | Rate          | SE   | Rate         | SE   | Rate             | SE   | Rate           | SE   | Rate              | SE   | Rate                     | SE   | Rate                            | SE   | Rate           | SE   |
| 1        | 8.53              | 0.38  | 6.54               | 3.66 | 0.05                       | 4.18 | 0.00                      | 0.00  | 0.05               | 2.57 | 3.83          | 3.16 | 0.49         | 4.18 | 0.38             | 4.66 | 4.31           | 0.27 | 107               | 3.46 | 0.00                     | 0.00 | 0.10                            | 3.82 | 28.97          | 0.69 |
| 2        | 7.78              | 0.74  | 5.04               | 0.59 | 0.03                       | 0.20 | 0.00                      | 0.00  | 0.07               | 2.46 | 3.57          | 0.50 | 0.56         | 0.20 | 102              | 0.27 | 2.98           | 0.45 | 103               | 0.26 | 0.00                     | 0.00 | 0.09                            | 2.25 | 13.12          | 0.95 |
| 3        | 6.09              | 0.55  | 7.49               | 3.32 | 0.03                       | 3.07 | 0.00                      | 0.00  | 0.06               | 2.48 | 3.73          | 3.16 | 0.42         | 3.07 | 0.33             | 3.71 | 3.95           | 0.46 | 0.86              | 0.87 | 0.00                     | 0.00 | 0.09                            | 2.27 | 20.97          | 1.13 |
| 4        | 6.36              | 1.10  | 6.56               | 1.18 | 0.02                       | 0.15 | 0.00                      | 0.00  | 0.07               | 2.58 | 1.87          | 0.40 | 0.32         | 0.15 | 0.38             | 0.23 | 4.49           | 0.70 | 0.74              | 0.25 | 0.00                     | 0.00 | 0.09                            | 2.36 | 24.88          | 2.21 |
| 5        | 9.20              | 0.39  | 0.00               | 0.00 | 0.42                       | 5.22 | 0.00                      | 0.00  | 0.04               | 0.02 | 5.91          | 4.53 | 0.60         | 5.22 | 0.48             | 5.26 | 0.00           | 0.00 | 122               | 2.06 | 0.21                     | 0.02 | 0.43                            | 4.32 | 6.93           | 0.34 |
| 6        | 7.94              | 0.78  | 0.00               | 0.00 | 0.29                       | 0.30 | 0.00                      | 0.00  | 0.04               | 0.02 | 5.47          | 0.65 | 1.17         | 0.30 | 1.48             | 0.34 | 0.00           | 0.00 | 100               | 0.28 | 0.56                     | 0.09 | 0.34                            | 3.42 | 2.36           | 0.42 |
| 7        | 6.15              | 0.54  | 0.00               | 0.00 | 0.31                       | 3.85 | 0.00                      | 0.00  | 0.04               | 0.02 | 4.04          | 3.82 | 0.82         | 3.85 | 0.57             | 0.18 | 0.00           | 0.00 | 0.83              | 0.20 | 0.13                     | 0.68 | 0.34                            | 3.53 | 3.80           | 0.44 |
| 8        | 6.21              | 0.85  | 0.00               | 0.00 | 0.31                       | 0.47 | 0.00                      | 0.00  | 0.05               | 0.02 | 3.68          | 10.4 | 1.59         | 0.47 | 0.70             | 1.40 | 0.00           | 0.00 | 0.82              | 0.29 | 0.41                     | 0.09 | 0.36                            | 3.52 | 5.70           | 0.84 |
| 9        | 4127              | 0.76  | 38.53              | 0.73 | 103                        | 0.21 | 124.56                    | 1.28  | 0.68               | 5.99 | 14.03         | 0.44 | 3.10         | 0.21 | 3.60             | 0.22 | 17.09          | 0.49 | 7.70              | 0.32 | 0.00                     | 0.00 | 0.88                            | 6.74 | 37.84          | 0.73 |
| 10       | 53.14             | 1.92  | 25.73              | 1.34 | 0.59                       | 0.60 | 121.73                    | 2.88  | 1.54               | 5.87 | 16.08         | 10.6 | 5.17         | 0.60 | 11.29            | 0.89 | 11.75          | 0.90 | 10.91             | 0.87 | 0.00                     | 0.00 | 0.94                            | 5.38 | 25.80          | 1.34 |
| 11       | 33.92             | 1.78  | 33.43              | 1.53 | 0.59                       | 0.52 | 77.25                     | 3.45  | 2.27               | 1.93 | 16.00         | 10.4 | 3.83         | 0.52 | 4.86             | 0.58 | 14.57          | 1.00 | 6.26              | 0.66 | 0.00                     | 0.00 | 0.81                            | 5.61 | 37.29          | 1.84 |
| 12       | 35.77             | 3.15  | 35.84              | 3.07 | 0.65                       | 0.66 | 91.82                     | 4.82  | 1.70               | 6.05 | 7.78          | 1.92 | 3.27         | 0.66 | 2.55             | 0.70 | 17.07          | 1.51 | 5.17              | 0.81 | 0.00                     | 0.00 | 0.85                            | 5.53 | 37.73          | 2.90 |
| 13       | 53.97             | 0.87  | 0.00               | 0.00 | 5.61                       | 0.36 | 0.00                      | 0.00  | 0.36               | 7.15 | 29.16         | 0.64 | 9.24         | 0.36 | 5.09             | 0.27 | 0.00           | 0.00 | 10.63             | 0.38 | 10.88                    | 0.16 | 3.65                            | 0.23 | 13.29          | 0.43 |
| 14       | 61.29             | 2.20  | 0.00               | 0.00 | 1.50                       | 1.02 | 0.00                      | 0.00  | 0.47               | 5.07 | 32.82         | 1.61 | 13.29        | 1.02 | 12.34            | 0.99 | 0.00           | 0.00 | 14.12             | 1.05 | 25.31                    | 0.58 | 1.90                            | 0.33 | 6.41           | 0.71 |
| 15       | 38.05             | 1.94  | 0.00               | 0.00 | 2.75                       | 1.06 | 0.00                      | 0.00  | 0.43               | 4.83 | 24.48         | 1.27 | 16.38        | 1.06 | 5.23             | 0.60 | 0.00           | 0.00 | 7.95              | 0.74 | 6.02                     | 0.38 | 1.96                            | 0.34 | 8.56           | 0.76 |
| 16       | 42.81             | 3.85  | 0.00               | 0.00 | 2.88                       | 2.28 | 0.00                      | 0.00  | 0.37               | 4.93 | 18.63         | 3.06 | 18.71        | 2.28 | 3.70             | 0.82 | 0.00           | 0.00 | 7.62              | 1.05 | 3.70                     | 0.50 | 2.51                            | 0.17 | 12.57          | 1.36 |
| 17       | 59.74             | 0.89  | 90.00              | 1.09 | 2.12                       | 0.35 | 305.45                    | 2.02  | 1.75               | 0.15 | 26.14         | 0.59 | 9.41         | 0.35 | 8.68             | 0.34 | 26.19          | 0.59 | 21.78             | 0.54 | 0.00                     | 0.00 | 1.72                            | 0.15 | 34.42          | 0.67 |
| 18       | 86.11             | 2.62  | 83.71              | 2.60 | 1.30                       | 1.21 | 306.22                    | 4.92  | 4.08               | 0.57 | 31.53         | 1.58 | 18.22        | 1.21 | 23.28            | 1.37 | 19.79          | 1.25 | 31.37             | 1.58 | 0.00                     | 0.00 | 1.92                            | 0.39 | 27.72          | 1.48 |
| 19       | 58.14             | 2.91  | 69.51              | 3.28 | 1.64                       | 1.33 | 218.85                    | 7.01  | 4.59               | 0.68 | 29.93         | 1.73 | 17.38        | 1.33 | 9.33             | 0.97 | 21.29          | 1.45 | 17.15             | 1.32 | 0.00                     | 0.00 | 1.87                            | 0.34 | 39.44          | 1.97 |
| 20       | 52.83             | 4.48  | 60.22              | 4.45 | 1.49                       | 1.97 | 233.48                    | 8.33  | 2.44               | 0.50 | 13.91         | 2.72 | 12.58        | 1.97 | 6.13             | 0.96 | 23.98          | 2.79 | 13.44             | 1.43 | 0.00                     | 0.00 | 1.57                            | 0.13 | 41.74          | 3.08 |
| 21       | 88.14             | 1.11  | 0.00               | 0.00 | 15.54                      | 0.73 | 0.00                      | 0.00  | 0.93               | 0.11 | 53.65         | 0.87 | 37.93        | 0.73 | 13.24            | 0.43 | 0.00           | 0.00 | 29.95             | 0.65 | 47.05                    | 0.34 | 9.19                            | 0.36 | 16.24          | 0.48 |
| 22       | 121.39            | 3.41  | 0.00               | 0.00 | 4.30                       | 2.72 | 0.00                      | 0.00  | 2.06               | 0.41 | 69.05         | 2.57 | 75.50        | 2.72 | 30.69            | 1.71 | 0.00           | 0.00 | 39.72             | 1.95 | 91.41                    | 1.22 | 4.87                            | 0.68 | 9.12           | 0.92 |
| 23       | 84.75             | 3.65  | 0.00               | 0.00 | 8.01                       | 2.98 | 0.00                      | 0.00  | 1.07               | 0.11 | 51.05         | 2.35 | 61.05        | 2.98 | 13.65            | 1.22 | 0.00           | 0.00 | 23.36             | 1.58 | 32.10                    | 1.21 | 5.15                            | 0.70 | 11.12          | 1.09 |
| 24       | 83.77             | 5.72  | 0.00               | 0.00 | 4.97                       | 4.85 | 0.00                      | 0.00  | 1.22               | 0.11 | 27.95         | 3.81 | 54.13        | 4.85 | 10.32            | 1.39 | 0.00           | 0.00 | 19.14             | 2.87 | 22.70                    | 1.31 | 5.16                            | 0.96 | 16.04          | 1.75 |
| 25       | 147.25            | 1.98  | 86.90              | 1.40 | 4.53                       | 0.62 | 429.43                    | 3.20  | 5.87               | 0.40 | 42.37         | 1.02 | 15.56        | 0.62 | 20.59            | 0.73 | 38.18          | 0.97 | 55.49             | 1.20 | 0.00                     | 0.00 | 4.36                            | 0.34 | 24.59          | 0.74 |
| 26       | 155.86            | 5.74  | 100.81             | 4.21 | 3.10                       | 1.98 | 398.07                    | 8.74  | 9.68               | 1.43 | 50.03         | 3.07 | 20.61        | 1.98 | 50.31            | 3.20 | 29.78          | 2.45 | 71.93             | 3.94 | 0.00                     | 0.00 | 3.41                            | 0.52 | 22.57          | 1.98 |
| 27       | 117.47            | 5.72  | 66.40              | 4.47 | 3.61                       | 3.17 | 285.07                    | 11.57 | 11.44              | 1.75 | 45.35         | 3.33 | 38.69        | 3.17 | 24.20            | 2.52 | 32.78          | 2.88 | 51.54             | 3.79 | 0.00                     | 0.00 | 3.89                            | 0.60 | 29.50          | 2.55 |
| 28       | 109.32            | 10.15 | 52.12              | 5.29 | 3.51                       | 4.72 | 266.14                    | 14.52 | 7.02               | 1.70 | 26.14         | 4.17 | 35.77        | 4.72 | 14.41            | 2.43 | 23.90          | 2.89 | 46.15             | 5.64 | 0.00                     | 0.00 | 4.11                            | 0.28 | 28.15          | 3.08 |
| 29       | 181.07            | 2.47  | 0.00               | 0.00 | 29.02                      | 1.10 | 0.00                      | 0.00  | 3.59               | 0.36 | 88.69         | 1.63 | 40.30        | 1.10 | 34.26            | 1.07 | 0.00           | 0.00 | 72.36             | 1.53 | 80.74                    | 0.61 | 19.38                           | 0.77 | 17.34          | 0.69 |
| 30       | 217.23            | 8.36  | 0.00               | 0.00 | 7.29                       | 3.98 | 0.00                      | 0.00  | 6.24               | 1.14 | 97.13         | 5.16 | 68.31        | 3.98 | 69.18            | 4.66 | 0.00           | 0.00 | 75.66             | 4.94 | 130.67                   | 2.34 | 8.81                            | 1.55 | 10.03          | 1.60 |
| 31       | 182.00            | 9.21  | 0.00               | 0.00 | 15.50                      | 5.01 | 0.00                      | 0.00  | 6.79               | 1.64 | 87.20         | 5.26 | 78.18        | 5.01 | 33.10            | 3.44 | 0.00           | 0.00 | 61.88             | 4.77 | 66.33                    | 2.57 | 11.49                           | 1.78 | 15.87          | 2.11 |
| 32       | 144.37            | 13.43 | 0.00               | 0.00 | 10.56                      | 7.52 | 0.00                      | 0.00  | 4.75               | 1.02 | 54.45         | 7.24 | 79.16        | 7.52 | 22.48            | 3.35 | 0.00           | 0.00 | 51.45             | 6.82 | 51.84                    | 2.78 | 11.34                           | 2.12 | 13.86          | 2.28 |



**Supplementary Table 5.** Health-related quality of life among US cancer patients aged 20 years or older, by cancer type and phase of care

| Cancer Type                     | Cancer Phase | Health Related Quality of Life | Source                               |
|---------------------------------|--------------|--------------------------------|--------------------------------------|
|                                 |              | mean (SE)                      |                                      |
| Endometrial                     | Overall      | 0.80 (0.14)                    | Naik et al. <sup>31</sup>            |
| Esophageal Adenocarcinoma       | Overall      | 0.69 (0.26)                    | Wildi et al. <sup>32</sup>           |
| Kidney                          | Overall      | 0.78 (0.14)                    | Pickard et al. <sup>33</sup>         |
| Liver                           | Overall      | 0.79 (0.19)                    | Naik et al. <sup>31</sup>            |
| Gallbladder                     | Overall      | 0.79 (0.19)                    | Naik et al. <sup>31</sup>            |
| Stomach (gastric cardia)        | Initial:     | 0.84 (0.25)                    | Zhou et al. <sup>34</sup>            |
|                                 | Continuous:  | 0.86 (0.24)                    |                                      |
|                                 | End of Life: | 0.65 (0.33)                    |                                      |
| Female Breast (post-menopausal) | Initial:     | 0.78 (0.19)                    | Yabroff et al. <sup>35</sup>         |
|                                 | Continuous:  | 0.81 (0.20)                    |                                      |
|                                 | End of Life: | 0.64 (0.16)                    |                                      |
| Pancreas                        | Overall      | 0.65 (0.30)                    | Müller-Nordhorn et al. <sup>36</sup> |
| Multiple myeloma                | Overall      | 0.79 (0.19)                    | Naik et al. <sup>31</sup>            |
| Advanced Prostate               | Initial:     | 0.78 (0.20)                    | Yabroff et al. <sup>35</sup>         |
|                                 | Continuous:  | 0.76 (0.19)                    |                                      |
|                                 | End of Life: | 0.59 (0.15)                    |                                      |
| Thyroid                         | Overall      | 0.85 (0.13)                    | Naik et al. <sup>31</sup>            |
| Ovary                           | Overall      | 0.77 (0.17)                    | Pickard et al. <sup>33</sup>         |
| Colorectal                      | Initial:     | 0.760 (0.19)                   | Färkkilä et al. <sup>37</sup>        |
|                                 | Continuous:  | 0.835 (0.20)                   |                                      |
|                                 | End of Life: | 0.643 (0.26)                   |                                      |

**Supplementary Table 6.** Baseline medical costs, productivity loss, and patient time costs among US cancer patients aged 20 years or older, by cancer type

| Cancer type               | Sex    | Age | Medical costs |            |             | Productivity loss |            |             | Patient time cost |            |             |
|---------------------------|--------|-----|---------------|------------|-------------|-------------------|------------|-------------|-------------------|------------|-------------|
|                           |        |     | Initial       | Continuous | End-of-life | Initial           | Continuous | End-of-life | Initial           | Continuous | End-of-life |
| Esophageal Adenocarcinoma | Female | <65 | 95439         | 6853       | 156417      | 4884              | 3757       | 15027       | 650               | 500        | 2001        |
|                           |        | ≥65 | 79532         | 6853       | 104278      | 6984              | 5372       | 21489       | 1187              | 913        | 3652        |
|                           | Male   | <65 | 95787         | 6450       | 155612      | 4884              | 3757       | 15027       | 650               | 500        | 2001        |
|                           |        | ≥65 | 79822         | 6450       | 103742      | 6984              | 5372       | 21489       | 1187              | 913        | 3652        |
| Stomach (Gastric Cardia)  | Female | <65 | 85291         | 3977       | 155636      | 4884              | 3757       | 15027       | 650               | 500        | 2001        |
|                           |        | ≥65 | 71076         | 3977       | 103758      | 6984              | 5372       | 21489       | 1187              | 913        | 3652        |
|                           | Male   | <65 | 94144         | 4282       | 160695      | 4884              | 3757       | 15027       | 650               | 500        | 2001        |
|                           |        | ≥65 | 78453         | 4282       | 107130      | 6984              | 5372       | 21489       | 1187              | 913        | 3652        |
| Liver                     | Female | <65 | 40173         | 5859       | 95782       | 4884              | 3757       | 15027       | 650               | 500        | 2001        |
|                           |        | ≥65 | 40173         | 5859       | 95782       | 6984              | 5372       | 21489       | 1187              | 913        | 3652        |
|                           | Male   | <65 | 41161         | 7363       | 97473       | 4884              | 3757       | 15027       | 650               | 500        | 2001        |
|                           |        | ≥65 | 41161         | 7363       | 97473       | 6984              | 5372       | 21489       | 1187              | 913        | 3652        |
| Pancreatic                | Female | <65 | 112154        | 8672       | 164911      | 4884              | 3757       | 15027       | 650               | 500        | 2001        |
|                           |        | ≥65 | 93462         | 8672       | 109941      | 6984              | 5372       | 21489       | 1187              | 913        | 3652        |
|                           | Male   | <65 | 112911        | 11697      | 169673      | 4884              | 3757       | 15027       | 650               | 500        | 2001        |
|                           |        | ≥65 | 94092         | 11697      | 113115      | 6984              | 5372       | 21489       | 1187              | 913        | 3652        |
| Advanced Prostate         | Male   | <65 | 23652         | 3201       | 93363       | 3715              | 2858       | 11432       | 650               | 500        | 2001        |
|                           |        | ≥65 | 19710         | 3201       | 62242       | 6549              | 5038       | 20152       | 1187              | 913        | 3652        |
| Colorectal                | Female | <65 | 61593         | 3159       | 126778      | 10330             | 7946       | 31784       | 650               | 500        | 2001        |
|                           |        | ≥65 | 51327         | 3159       | 84519       | 7479              | 5753       | 23012       | 1187              | 913        | 3652        |

|                         |        |     |       |      |        |       |      |       |      |     |      |
|-------------------------|--------|-----|-------|------|--------|-------|------|-------|------|-----|------|
|                         | Male   | <65 | 62174 | 4595 | 128507 | 10330 | 7946 | 31784 | 650  | 500 | 2001 |
|                         |        | ≥65 | 51812 | 4595 | 85671  | 7479  | 5753 | 23012 | 1187 | 913 | 3652 |
| Endometrial             | Female | <65 | 32129 | 1535 | 105262 | 4884  | 3757 | 15027 | 650  | 500 | 2001 |
|                         |        | ≥65 | 26775 | 1535 | 70175  | 6984  | 5372 | 21489 | 1187 | 913 | 3652 |
| Ovarian                 | Female | <65 | 98788 | 8296 | 149573 | 4884  | 3757 | 15027 | 650  | 500 | 2001 |
|                         |        | ≥65 | 82324 | 8296 | 99715  | 6984  | 5372 | 21489 | 1187 | 913 | 3652 |
| Gallbladder             | Female | <65 | 40173 | 5859 | 95782  | 4884  | 3757 | 15027 | 650  | 500 | 2001 |
|                         |        | ≥65 | 40173 | 5859 | 95782  | 6984  | 5372 | 21489 | 1187 | 913 | 3652 |
|                         | Male   | <65 | 41161 | 7363 | 97473  | 4884  | 3757 | 15027 | 650  | 500 | 2001 |
|                         |        | ≥65 | 41161 | 7363 | 97473  | 6984  | 5372 | 21489 | 1187 | 913 | 3652 |
| Kidney (Renal Cell)     | Female | <65 | 46077 | 6255 | 110765 | 4884  | 3757 | 15027 | 650  | 500 | 2001 |
|                         |        | ≥65 | 38397 | 6255 | 73843  | 6984  | 5372 | 21489 | 1187 | 913 | 3652 |
|                         | Male   | <65 | 46048 | 6018 | 117123 | 4884  | 3757 | 15027 | 650  | 500 | 2001 |
|                         |        | ≥65 | 38374 | 6018 | 78082  | 6984  | 5372 | 21489 | 1187 | 913 | 3652 |
| Breast (Postmenopausal) | Female | <65 | 27693 | 2207 | 94284  | 5985  | 4604 | 18416 | 650  | 500 | 2001 |
|                         |        | ≥65 | 23078 | 2207 | 62856  | 4752  | 3655 | 14620 | 1187 | 913 | 3652 |
| Thyroid                 | Female | <65 | 40173 | 5859 | 95782  | 4884  | 3757 | 15027 | 650  | 500 | 2001 |
|                         |        | ≥65 | 40173 | 5859 | 95782  | 6984  | 5372 | 21489 | 1187 | 913 | 3652 |
|                         | Male   | <65 | 41161 | 7363 | 97473  | 4884  | 3757 | 15027 | 650  | 500 | 2001 |
|                         |        | ≥65 | 41161 | 7363 | 97473  | 6984  | 5372 | 21489 | 1187 | 913 | 3652 |
| Multiple Myeloma        | Female | <65 | 40173 | 5859 | 95782  | 4884  | 3757 | 15027 | 650  | 500 | 2001 |
|                         |        | ≥65 | 40173 | 5859 | 95782  | 6984  | 5372 | 21489 | 1187 | 913 | 3652 |



---

|      |     |       |      |       |      |      |       |      |     |      |
|------|-----|-------|------|-------|------|------|-------|------|-----|------|
| Male | <65 | 41161 | 7363 | 97473 | 4884 | 3757 | 15027 | 650  | 500 | 2001 |
|      | ≥65 | 41161 | 7363 | 97473 | 6984 | 5372 | 21489 | 1187 | 913 | 3652 |

---

**Supplementary Table 7.** Baseline medical costs, productivity loss, and patient time cost among general population aged 20 years or older in the US, by 32 subgroups

| Age group, years | Sex    | Race/ethnicity | Medical costs        |                   | Productivity loss    |                   | Patient time cost    |                   |
|------------------|--------|----------------|----------------------|-------------------|----------------------|-------------------|----------------------|-------------------|
|                  |        |                | Annual general costs | End-of-life costs | Annual general costs | End-of-life costs | Annual general costs | End-of-life costs |
| 20-44            | Female | NHW            | 4020                 | 40000             | 2040                 | 8160              | 226                  | 904               |
|                  |        | NHB            | 3100                 | 40000             | 2040                 | 8160              | 226                  | 904               |
|                  |        | Hispanic       | 2355                 | 40000             | 2040                 | 8160              | 226                  | 904               |
|                  |        | Other          | 2617                 | 40000             | 2040                 | 8160              | 226                  | 904               |
|                  | Male   | NHW            | 2022                 | 40000             | 2040                 | 8160              | 226                  | 904               |
|                  |        | NHB            | 2279                 | 40000             | 2040                 | 8160              | 226                  | 904               |
|                  |        | Hispanic       | 1145                 | 40000             | 2040                 | 8160              | 226                  | 904               |
|                  |        | Other          | 1803                 | 40000             | 2040                 | 8160              | 226                  | 904               |
| 45-54            | Female | NHW            | 5371                 | 40000             | 2040                 | 8160              | 226                  | 904               |
|                  |        | NHB            | 5712                 | 40000             | 2040                 | 8160              | 226                  | 904               |
|                  |        | Hispanic       | 3196                 | 40000             | 2040                 | 8160              | 226                  | 904               |
|                  |        | Other          | 4082                 | 40000             | 2040                 | 8160              | 226                  | 904               |
|                  | Male   | NHW            | 3812                 | 40000             | 2040                 | 8160              | 226                  | 904               |
|                  |        | NHB            | 3639                 | 40000             | 2040                 | 8160              | 226                  | 904               |
|                  |        | Hispanic       | 3612                 | 40000             | 2040                 | 8160              | 226                  | 904               |
|                  |        | Other          | 2560                 | 40000             | 2040                 | 8160              | 226                  | 904               |
| 55-64            | Female | NHW            | 7300                 | 40000             | 2040                 | 8160              | 226                  | 904               |
|                  |        | NHB            | 5479                 | 40000             | 2040                 | 8160              | 226                  | 904               |
|                  |        | Hispanic       | 4607                 | 40000             | 2040                 | 8160              | 226                  | 904               |
|                  |        | Other          | 3951                 | 40000             | 2040                 | 8160              | 226                  | 904               |
|                  | Male   | NHW            | 6519                 | 40000             | 2040                 | 8160              | 226                  | 904               |
|                  |        | NHB            | 6455                 | 40000             | 2040                 | 8160              | 226                  | 904               |
|                  |        | Hispanic       | 5077                 | 40000             | 2040                 | 8160              | 226                  | 904               |
|                  |        | Other          | 6320                 | 40000             | 2040                 | 8160              | 226                  | 904               |
| ≥65              | Female | NHW            | 8997                 | 40000             | 4409                 | 8160              | 607                  | 904               |
|                  |        | NHB            | 9585                 | 40000             | 4409                 | 8160              | 607                  | 904               |
|                  |        | Hispanic       | 8847                 | 40000             | 4409                 | 8160              | 607                  | 904               |
|                  |        | Other          | 8625                 | 40000             | 4409                 | 8160              | 607                  | 904               |
|                  | Male   | NHW            | 9334                 | 40000             | 4409                 | 8160              | 607                  | 904               |
|                  |        | NHB            | 7367                 | 40000             | 4409                 | 8160              | 607                  | 904               |
|                  |        | Hispanic       | 5640                 | 40000             | 4409                 | 8160              | 607                  | 904               |
|                  |        | Other          | 7461                 | 40000             | 4409                 | 8160              | 607                  | 904               |

**Supplementary Table 8.** Characteristics of US adults aged 20 years or older participated in the NHANES, 2013-2016

| Characteristics<br>(N=10064)                   | Calorie Consumption, kcal/day |            |
|------------------------------------------------|-------------------------------|------------|
| <b>Age, years</b>                              | 47.8 ± 0.41                   |            |
| <b>Age groups, years, N (%)</b>                |                               |            |
| 20-44                                          | 4319 (44.5)                   | 425 ± 4.38 |
| 25-54                                          | 1704 (18.3)                   | 315 ± 5.39 |
| 55-64                                          | 1725 (17.3)                   | 271 ± 4.90 |
| ≥65                                            | 2316 (19.9)                   | 192 ± 3.83 |
| <b>Sex, N (%)</b>                              |                               |            |
| Male                                           | 4829 (48.3)                   | 388 ± 4.53 |
| Female                                         | 5235 (51.7)                   | 279 ± 4.04 |
| <b>Race/ethnicity, N (%)</b>                   |                               |            |
| Non-Hispanic White                             | 3944 (65.0)                   | 320 ± 4.76 |
| Non-Hispanic Black                             | 2069 (11.2)                   | 361 ± 6.55 |
| Hispanic                                       | 2668 (14.9)                   | 367 ± 4.44 |
| Other                                          | 1383 (8.90)                   | 325 ± 8.12 |
| <b>Education, N (%)</b>                        |                               |            |
| Less than high school graduate                 | 2178 (14.2)                   | 311 ± 5.14 |
| High school graduate                           | 2249 (21.6)                   | 332 ± 5.72 |
| Some college                                   | 3070 (33.1)                   | 341 ± 4.92 |
| College graduate                               | 2562 (31.0)                   | 332 ± 7.10 |
| <b>Family income to poverty ratio, N (%)</b>   |                               |            |
| <1.30                                          | 3862 (28.3)                   | 325 ± 4.87 |
| 1.30-1.84                                      | 2842 (26.7)                   | 333 ± 4.55 |
| 1.85-2.99                                      | 1725 (20.4)                   | 344 ± 6.73 |
| ≥3.00                                          | 1635 (24.5)                   | 328 ± 7.01 |
| <b>Body mass index (BMI), kg/m<sup>2</sup></b> | 29.3 ± 0.16                   |            |
| <b>Weight status, N (%)</b>                    |                               |            |
| Underweight (BMI<18.5)                         | 145 (1.36)                    | 341 ± 17.5 |
| Normal weight (BMI=18.5-24.9)                  | 2671 (27.2)                   | 327 ± 4.81 |
| Overweight/Obese (BMI≥25)                      | 7163 (71.4)                   | 334 ± 4.01 |

**Supplementary Table 9.** Consumption of calories from full-service and fast-food restaurants among US adults participated in 2013-2016 NHANES by 32 subgroups

| Age group, years | Sex    | Race/ethnicity | Baseline consumption,<br>kcal/day<br>(mean $\pm$ SE) |
|------------------|--------|----------------|------------------------------------------------------|
| 20-44            | Female | NHW            | 357 $\pm$ 6.47                                       |
|                  |        | NHB            | 397 $\pm$ 8.98                                       |
|                  |        | Hispanic       | 364 $\pm$ 6.77                                       |
|                  |        | Other          | 334 $\pm$ 11.3                                       |
|                  | Male   | NHW            | 485 $\pm$ 9.00                                       |
|                  |        | NHB            | 508 $\pm$ 12.3                                       |
|                  |        | Hispanic       | 500 $\pm$ 13.7                                       |
|                  |        | Other          | 466 $\pm$ 14.1                                       |
| 45-54            | Female | NHW            | 270 $\pm$ 9.38                                       |
|                  |        | NHB            | 266 $\pm$ 7.85                                       |
|                  |        | Hispanic       | 265 $\pm$ 9.11                                       |
|                  |        | Other          | 228 $\pm$ 14.6                                       |
|                  | Male   | NHW            | 374 $\pm$ 11.3                                       |
|                  |        | NHB            | 388 $\pm$ 17.4                                       |
|                  |        | Hispanic       | 355 $\pm$ 15.0                                       |
|                  |        | Other          | 338 $\pm$ 20.2                                       |
| 55-64            | Female | NHW            | 231 $\pm$ 5.25                                       |
|                  |        | NHB            | 249 $\pm$ 9.58                                       |
|                  |        | Hispanic       | 234 $\pm$ 7.99                                       |
|                  |        | Other          | 216 $\pm$ 10.2                                       |
|                  | Male   | NHW            | 315 $\pm$ 9.55                                       |
|                  |        | NHB            | 314 $\pm$ 18.3                                       |
|                  |        | Hispanic       | 307 $\pm$ 9.90                                       |
|                  |        | Other          | 298 $\pm$ 11.1                                       |
| $\geq$ 65        | Female | NHW            | 164 $\pm$ 4.71                                       |
|                  |        | NHB            | 156 $\pm$ 6.07                                       |
|                  |        | Hispanic       | 158 $\pm$ 5.27                                       |
|                  |        | Other          | 137 $\pm$ 5.43                                       |
|                  | Male   | NHW            | 235 $\pm$ 7.43                                       |
|                  |        | NHB            | 220 $\pm$ 7.07                                       |
|                  |        | Hispanic       | 218 $\pm$ 8.07                                       |

---

Other

198 ± 20.0

**Supplementary Table 10.** Estimated new cancer cases averted by the federal menu calorie labeling in the US by age, sex, race/ethnicity, and cancer type, over lifetime (U.S. population=235,162,844)<sup>1</sup>

| Cancer Type                    | Policy Scenario           | 20-44 y                |      | 45-54 y                 |      | 55-64 y               |      | 65 + y               |      |  |
|--------------------------------|---------------------------|------------------------|------|-------------------------|------|-----------------------|------|----------------------|------|--|
|                                |                           | Female                 | Male | Female                  | Male | Female                | Male | Female               | Male |  |
| <b>Endometrial</b>             |                           |                        |      |                         |      |                       |      |                      |      |  |
| Age                            | <i>consumer behavior</i>  | 3300 (696 to 6090)     |      | 591 (-990 to 2160)      |      | 1140 (433 to 1940)    |      | 656 (107 to 1190)    |      |  |
|                                | <i>+industry response</i> | 5960 (3360 to 8890)    |      | 1340 (-208 to 2980)     |      | 1600 (928 to 2430)    |      | 926 (396 to 1460)    |      |  |
| Race/Ethnicity                 |                           |                        |      |                         |      |                       |      |                      |      |  |
| Non-Hispanic White             | <i>consumer behavior</i>  | 1630<br>(-711 to 4080) | 0    | -136<br>(-1590 to 1430) | 0    | 757<br>(140 to 1500)  | 0    | 572<br>(38 to 1070)  | 0    |  |
|                                | <i>+industry response</i> | 3080<br>(829 to 5780)  | 0    | 369<br>(-1100 to 1950)  | 0    | 1110<br>(463 to 1830) | 0    | 780<br>(245 to 1290) | 0    |  |
| Non-Hispanic Black             | <i>consumer behavior</i>  | 763<br>(-157 to 1710)  | 0    | 258<br>(-23 to 543)     | 0    | 283<br>(73 to 528)    | 0    | 47<br>(-43 to 150)   | 0    |  |
|                                | <i>+industry response</i> | 1240<br>(316 to 2200)  | 0    | 372<br>(93 to 668)      | 0    | 355<br>(146 to 604)   | 0    | 77<br>(-13 to 176)   | 0    |  |
| Hispanic                       | <i>consumer behavior</i>  | 910<br>(74 to 1790)    | 0    | 290<br>(-48 to 596)     | 0    | 42<br>(-83 to 185)    | 0    | 43<br>(-16 to 102)   | 0    |  |
|                                | <i>+industry response</i> | 1460<br>(580 to 2340)  | 0    | 399<br>(66 to 703)      | 0    | 89<br>(-35 to 233)    | 0    | 64<br>(5 to 122)     | 0    |  |
| Other                          | <i>consumer behavior</i>  | 19<br>(-312 to 402)    | 0    | 165<br>(41 to 319)      | 0    | 54<br>(3 to 109)      | 0    | -6<br>(-26 to 14)    | 0    |  |
|                                | <i>+industry response</i> | 150<br>(-174 to 546)   | 0    | 191<br>(68 to 344)      | 0    | 68<br>(18 to 124)     | 0    | 0<br>(-21 to 21)     | 0    |  |
| <b>Breast (Postmenopausal)</b> |                           |                        |      |                         |      |                       |      |                      |      |  |
| Age                            | <i>consumer behavior</i>  | 2530 (263 to 5040)     |      | 373 (-1070 to 1950)     |      | 1210 (480 to 2130)    |      | 742 (137 to 1380)    |      |  |
|                                | <i>+industry response</i> | 4670 (2330 to 7350)    |      | 1040 (-390 to 2680)     |      | 1710 (1010 to 2640)   |      | 1040 (433 to 1700)   |      |  |
| Race/Ethnicity                 |                           |                        |      |                         |      |                       |      |                      |      |  |
| Non-Hispanic White             | <i>consumer behavior</i>  | 1370<br>(-659 to 3750) | 0    | -224<br>(-1570 to 1210) | 0    | 832<br>(170 to 1670)  | 0    | 660<br>(57 to 1280)  | 0    |  |
|                                | <i>+industry response</i> | 2660<br>(490 to 5220)  | 0    | 234<br>(-1130 to 1770)  | 0    | 1200<br>(535 to 2040) | 0    | 902<br>(291 to 1570) | 0    |  |
| Non-Hispanic Black             | <i>consumer behavior</i>  | 567<br>(-110 to 1300)  | 0    | 182<br>(-34 to 431)     | 0    | 267<br>(89 to 487)    | 0    | 43<br>(-40 to 136)   | 0    |  |

|                            |                           |                      |                        |                      |                       |                      |                      |                    |                      |
|----------------------------|---------------------------|----------------------|------------------------|----------------------|-----------------------|----------------------|----------------------|--------------------|----------------------|
| Hispanic                   | <i>+industry response</i> | 912<br>(240 to 1680) | 0                      | 271<br>(55 to 536)   | 0                     | 329<br>(149 to 554)  | 0                    | 71<br>(-13 to 166) | 0                    |
|                            | <i>consumer behavior</i>  | 581<br>(44 to 1200)  | 0                      | 231<br>(-14 to 474)  | 0                     | 32.9<br>(-72 to 154) | 0                    | 42<br>(-12 to 100) | 0                    |
| Other                      | <i>+industry response</i> | 934<br>(368 to 1600) | 0                      | 312<br>(71 to 563)   | 0                     | 76<br>(-34 to 198)   | 0                    | 61<br>(6 to 123)   | 0                    |
|                            | <i>consumer behavior</i>  | 1<br>(-310 to 384)   | 0                      | 182<br>(40 to 353)   | 0                     | 74<br>(9 to 148)     | 0                    | -7<br>(-35 to 22)  | 0                    |
|                            | <i>+industry response</i> | 128<br>(-187 to 541) | 0                      | 210<br>(71 to 386)   | 0                     | 94<br>(29 to 170)    | 0                    | 1<br>(-27 to 31)   | 0                    |
| <b>Kidney (Renal Cell)</b> |                           |                      |                        |                      |                       |                      |                      |                    |                      |
| Age                        | <i>consumer behavior</i>  | 2930 (864 to 5040)   |                        | 581 (-364 to 1540)   |                       | 1180 (526 to 1810)   |                      | 428 (28 to 805)    |                      |
|                            | <i>+industry response</i> | 5240 (3110 to 7390)  |                        | 1230 (244 to 2210)   |                       | 1590 (941 to 2250)   |                      | 651 (248 to 1030)  |                      |
| Race/Ethnicity             |                           |                      |                        |                      |                       |                      |                      |                    |                      |
| Non-Hispanic White         | <i>consumer behavior</i>  | 338<br>(-137 to 844) | 1040<br>(-536 to 2790) | -42<br>(-332 to 273) | 53<br>(-791 to 884)   | 172<br>(34 to 339)   | 677<br>(88 to 1240)  | 147<br>(18 to 280) | 192<br>(-170 to 536) |
|                            | <i>+industry response</i> | 646<br>(173 to 1180) | 2020<br>(410 to 3750)  | 58<br>(-236 to 383)  | 379<br>(-452 to 1250) | 251<br>(109 to 420)  | 898<br>(326 to 1470) | 199<br>(72 to 335) | 320<br>(-35 to 661)  |
| Non-Hispanic Black         | <i>consumer behavior</i>  | 170<br>(-35 to 384)  | 88<br>(-454 to 620)    | 60<br>(-5 to 128)    | 136<br>(-96 to 410)   | 79<br>(26 to 139)    | 85<br>(-81 to 258)   | 13<br>(-12 to 40)  | 44<br>(9 to 79)      |
|                            | <i>+industry response</i> | 280<br>(69 to 502)   | 343<br>(-202 to 898)   | 87<br>(22 to 157)    | 203<br>(-30 to 475)   | 97<br>(43 to 157)    | 119<br>(-45 to 295)  | 21<br>(-4 to 48)   | 56<br>(22 to 90)     |
| Hispanic                   | <i>consumer behavior</i>  | 267<br>(21 to 527)   | 895<br>(-21 to 1920)   | 92<br>(-4 to 184)    | 230<br>(-25 to 503)   | 14<br>(-27 to 60)    | 94<br>(8 to 196)     | 15<br>(-6 to 36)   | 9<br>(-29 to 50)     |
|                            | <i>+industry response</i> | 425<br>(166 to 697)  | 1290<br>(371 to 2320)  | 123<br>(27 to 218)   | 305<br>(49 to 570)    | 29<br>(-12 to 76)    | 127<br>(41 to 232)   | 22<br>(2 to 44)    | 21<br>(-17 to 63)    |
| Other                      | <i>consumer behavior</i>  | 5<br>(-47 to 66)     | 75<br>(-103 to 274)    | 34<br>(12 to 59)     | 3<br>(-64 to 77)      | 13<br>(2 to 25)      | 33<br>(10 to 58)     | -1<br>(-6 to 4)    | 8<br>(-18 to 37)     |
|                            | <i>+industry response</i> | 27<br>(-26 to 89)    | 147<br>(-29 to 347)    | 38<br>(17 to 64)     | 17<br>(-52 to 91)     | 16<br>(5 to 28)      | 41<br>(19 to 67)     | 1<br>(-4 to 6)     | 11<br>(-15 to 40)    |
| <b>Liver</b>               |                           |                      |                        |                      |                       |                      |                      |                    |                      |
| Age                        | <i>consumer behavior</i>  | 3210 (1000 to 5540)  |                        | 701 (-200 to 1760)   |                       | 1000 (477 to 1580)   |                      | 275 (17 to 551)    |                      |
|                            | <i>+industry response</i> | 5560 (3130 to 8130)  |                        | 1340 (397 to 2480)   |                       | 1340 (804 to 1950)   |                      | 432 (174 to 719)   |                      |
| Race/Ethnicity             |                           |                      |                        |                      |                       |                      |                      |                    |                      |

|                    |                           |                      |                        |                      |                       |                    |                      |                    |                      |
|--------------------|---------------------------|----------------------|------------------------|----------------------|-----------------------|--------------------|----------------------|--------------------|----------------------|
| Non-Hispanic White | <i>consumer behavior</i>  | 170<br>(-125 to 597) | 1150<br>(-258 to 3130) | 18<br>(-168 to 236)  | -82<br>(-844 to 807)  | 113<br>(36 to 227) | 520<br>(108 to 1020) | 75<br>(6 to 155)   | 116<br>(-110 to 365) |
|                    | <i>+industry response</i> | 367<br>(53 to 855)   | 2120<br>(498 to 4300)  | 78<br>(-105 to 319)  | 215<br>(-537 to 1150) | 159<br>(77 to 280) | 668<br>(287 to 1220) | 100<br>(35 to 189) | 198<br>(-26 to 454)  |
| Non-Hispanic Black | <i>consumer behavior</i>  | 143<br>(-27 to 346)  | 85<br>(-678 to 1050)   | 53<br>(2 to 120)     | 213<br>(-146 to 705)  | 51<br>(14 to 100)  | 118<br>(-112 to 393) | 7<br>(-7 to 26)    | 37<br>(-4 to 88)     |
|                    | <i>+industry response</i> | 231<br>(53 to 458)   | 429<br>(-312 to 1460)  | 74<br>(24 to 147)    | 306<br>(-41 to 823)   | 63<br>(28 to 115)  | 163<br>(-58 to 447)  | 12<br>(-2 to 32)   | 52<br>(11 to 107)    |
| Hispanic           | <i>consumer behavior</i>  | 239<br>(19 to 570)   | 1150<br>(93 to 2490)   | 99<br>(3 to 215)     | 321<br>(15 to 703)    | 14<br>(-30 to 72)  | 113<br>(19 to 233)   | 17<br>(-5 to 41)   | 8<br>(-33 to 54)     |
|                    | <i>+industry response</i> | 384<br>(132 to 756)  | 1600<br>(529 to 3050)  | 132<br>(36 to 257)   | 409<br>(106 to 820)   | 31<br>(-13 to 90)  | 150<br>(55 to 276)   | 25<br>(3 to 50)    | 20<br>(-19 to 70)    |
| Other              | <i>consumer behavior</i>  | 2<br>(-56 to 82)     | 99<br>(-125 to 379)    | 38<br>(9 to 77)      | -1<br>(-101 to 125)   | 15<br>(0 to 34)    | 38<br>(5 to 76)      | 0<br>(-8 to 7)     | 9<br>(-28 to 53)     |
|                    | <i>+industry response</i> | 26<br>(-32 to 108)   | 183<br>(-31 to 483)    | 43<br>(15 to 85)     | 18<br>(-80 to 152)    | 19<br>(5 to 40)    | 48<br>(17 to 91)     | 2<br>(-5 to 10)    | 14<br>(-23 to 59)    |
| <b>Pancreatic</b>  |                           |                      |                        |                      |                       |                    |                      |                    |                      |
| Age                | <i>consumer behavior</i>  | 764 (262 to 1340)    |                        | 81.6 (-186 to 388)   |                       | 404 (193 to 651)   |                      | 148 (21 to 286)    |                      |
|                    | <i>+industry response</i> | 1350 (820 to 1990)   |                        | 269 (4 to 595)       |                       | 540 (327 to 793)   |                      | 227 (96 to 370)    |                      |
| Race/Ethnicity     |                           |                      |                        |                      |                       |                    |                      |                    |                      |
| Non-Hispanic White | <i>consumer behavior</i>  | 121<br>(-44 to 367)  | 247<br>(-120 to 768)   | -48<br>(-159 to 87)  | -16<br>(-246 to 245)  | 87<br>(26 to 175)  | 218<br>(48 to 432)   | 63<br>(3 to 131)   | 58<br>(-54 to 189)   |
|                    | <i>+industry response</i> | 229<br>(50 to 493)   | 490<br>(99 to 1060)    | -11<br>(-124 to 134) | 73<br>(-154 to 363)   | 122<br>(56 to 218) | 283<br>(115 to 507)  | 87<br>(27 to 163)  | 98<br>(-12 to 238)   |
| Non-Hispanic Black | <i>consumer behavior</i>  | 60<br>(-10 to 158)   | 18<br>(-80 to 128)     | 24<br>(-1 to 54)     | 30<br>(-20 to 87)     | 32<br>(9 to 63)    | 19<br>(-16 to 62)    | 5<br>(-6 to 19)    | 10<br>(2 to 19)      |
|                    | <i>+industry response</i> | 98<br>(21 to 207)    | 64<br>(-36 to 184)     | 34<br>(9 to 67)      | 44<br>(-4 to 102)     | 39<br>(17 to 72)   | 27<br>(-9 to 70)     | 9<br>(-2 to 23)    | 13<br>(5 to 23)      |
| Hispanic           | <i>consumer behavior</i>  | 68<br>(5 to 150)     | 194<br>(13 to 422)     | 26<br>(-4 to 60)     | 46<br>(-5 to 105)     | 4<br>(-11 to 22)   | 18<br>(-3 to 44)     | 6<br>(-2 to 14)    | 2<br>(-8 to 12)      |
|                    | <i>+industry response</i> | 108<br>(40 to 201)   | 273<br>(92 to 518)     | 36<br>(7 to 70)      | 63<br>(11 to 124)     | 10<br>(-5 to 28)   | 26<br>(6 to 53)      | 8<br>(0 to 18)     | 5<br>(-5 to 15)      |
| Other              | <i>consumer behavior</i>  | -2<br>(-27 to 30)    | 18<br>(-29 to 72)      | 17<br>(4 to 33)      | 0<br>(-20 to 23)      | 8<br>(1 to 16)     | 10<br>(3 to 19)      | 0<br>(-4 to 3)     | 2<br>(-6 to 13)      |
|                    | <i>+industry response</i> | 9<br>(-17 to 43)     | 36<br>(-9 to 94)       | 19<br>(7 to 36)      | 4<br>(-16 to 28)      | 10<br>(3 to 18)    | 13<br>(5 to 22)      | 1<br>(-3 to 5)     | 4<br>(-5 to 14)      |



**Esophageal Adenocarcinoma**

|                    |                           |                    |                       |                   |                      |                  |                     |                  |                     |
|--------------------|---------------------------|--------------------|-----------------------|-------------------|----------------------|------------------|---------------------|------------------|---------------------|
| Age                | <i>consumer behavior</i>  | 715 (43 to 1480)   |                       | 92 (-296 to 501)  |                      | 419 (136 to 719) |                     | 128 (-60 to 309) |                     |
|                    | <i>+industry response</i> | 1300 (602 to 2100) |                       | 293 (-102 to 708) |                      | 556 (270 to 858) |                     | 206 (20 to 390)  |                     |
| Race/Ethnicity     |                           |                    |                       |                   |                      |                  |                     |                  |                     |
| Non-Hispanic White | <i>consumer behavior</i>  | 45<br>(-25 to 125) | 406<br>(-228 to 1100) | -9<br>(-55 to 41) | 26<br>(-368 to 419)  | 30<br>(7 to 58)  | 345<br>(64 to 630)  | 27<br>(5 to 50)  | 92<br>(-88 to 263)  |
|                    | <i>+industry response</i> | 91<br>(17 to 179)  | 815<br>(174 to 1560)  | 7<br>(-40 to 60)  | 179<br>(-210 to 578) | 43<br>(20 to 73) | 449<br>(174 to 739) | 35<br>(14 to 59) | 155<br>(-17 to 330) |
| Non-Hispanic Black | <i>consumer behavior</i>  | 10<br>(-2 to 22)   | 10<br>(-28 to 50)     | 3<br>(-1 to 8)    | 11<br>(-7 to 32)     | 5<br>(2 to 9)    | 67<br>(-7 to 22)    | 1<br>(-1 to 3)   | 4<br>(0 to 7)       |
|                    | <i>+industry response</i> | 16<br>(4 to 29)    | 28<br>(-11 to 69)     | 5<br>(1 to 9)     | 16<br>(-2 to 37)     | 6<br>(3 to 11)   | 9<br>(-4 to 25)     | 1<br>(0 to 3)    | 5<br>(2 to 8)       |
| Hispanic           | <i>consumer behavior</i>  | 28<br>(2 to 57)    | 196<br>(-2 to 414)    | 9<br>(-1 to 20)   | 46<br>(-7 to 112)    | 2<br>(-3 to 8)   | 24<br>(3 to 47)     | 2<br>(-1 to 4)   | 2<br>(-7 to 12)     |
|                    | <i>+industry response</i> | 44<br>(17 to 76)   | 280<br>(80 to 504)    | 13<br>(2 to 24)   | 63<br>(7 to 130)     | 3<br>(-1 to 10)  | 32<br>(11 to 56)    | 3<br>(0 to 5)    | 4<br>(-4 to 15)     |
| Other              | <i>consumer behavior</i>  | -1<br>(-10 to 11)  | 10<br>(-16 to 41)     | 6<br>(1 to 11)    | 0<br>(-12 to 13)     | 2<br>(0 to 5)    | 7<br>(2 to 12)      | 0<br>(-1 to 1)   | 2<br>(-4 to 8)      |
|                    | <i>+industry response</i> | 3<br>(-6 to 15)    | 21<br>(-6 to 52)      | 75<br>(2 to 12)   | 2<br>(-10 to 15)     | 3<br>(1 to 6)    | 8<br>(4 to 13)      | 0<br>(-1 to 1)   | 2<br>(-3 to 9)      |

**Colorectal**

|                    |                           |                    |                      |                     |                      |                   |                    |                   |                    |
|--------------------|---------------------------|--------------------|----------------------|---------------------|----------------------|-------------------|--------------------|-------------------|--------------------|
| Age                | <i>consumer behavior</i>  | 584 (183 to 1090)  |                      | 79 (-90 to 289)     |                      | 251 (126 to 412)  |                    | 117 (19 to 224)   |                    |
|                    | <i>+industry response</i> | 1050 (605 to 1610) |                      | 201 (23 to 426)     |                      | 341 (209 to 514)  |                    | 175 (81 to 289)   |                    |
| Race/Ethnicity     |                           |                    |                      |                     |                      |                   |                    |                   |                    |
| Non-Hispanic White | <i>consumer behavior</i>  | 67<br>(-51 to 261) | 169<br>(-107 to 569) | -35<br>(-106 to 64) | -17<br>(-151 to 163) | 52<br>(11 to 111) | 126<br>(21 to 262) | 55<br>(11 to 115) | 44<br>(-36 to 129) |
|                    | <i>+industry response</i> | 144<br>(-2 to 382) | 358<br>(40 to 790)   | -12<br>(-80 to 97)  | 38<br>(-99 to 233)   | 75<br>(30 to 146) | 168<br>(62 to 313) | 73<br>(28 to 138) | 70<br>(-7 to 162)  |
| Non-Hispanic Black | <i>consumer behavior</i>  | 31<br>(-9 to 88)   | 38<br>(-48 to 144)   | 11<br>(-1 to 29)    | 26<br>(-13 to 79)    | 19<br>(7 to 36)   | 14<br>(-17 to 49)  | 3<br>(-4 to 12)   | 8<br>(1 to 17)     |
|                    | <i>+industry response</i> | 53<br>(9 to 119)   | 78<br>(-8 to 203)    | 17<br>(4 to 36)     | 36<br>(-2 to 91)     | 23<br>(11 to 41)  | 20<br>(-9 to 56)   | 6<br>(-1 to 15)   | 11<br>(3 to 21)    |
| Hispanic           | <i>consumer behavior</i>  | 45<br>(2 to 113)   | 185<br>(25 to 409)   | 20<br>(1 to 43)     | 57<br>(9 to 114)     | 3<br>(-7 to 16)   | 21<br>(2 to 44)    | 4<br>(-1 to 11)   | 1<br>(-8 to 11)    |

|                         |                           |                     |                     |                    |                    |                  |                    |                 |                   |
|-------------------------|---------------------------|---------------------|---------------------|--------------------|--------------------|------------------|--------------------|-----------------|-------------------|
| Other                   | <i>+industry response</i> | 73<br>(18 to 155)   | 256<br>(84 to 504)  | 26<br>(8 to 51)    | 70<br>(23 to 129)  | 6<br>(-3 to 20)  | 28<br>(10 to 53)   | 6<br>(1 to 13)  | 4<br>(-5 to 14)   |
|                         | <i>consumer behavior</i>  | -2<br>(-21 to 26)   | 20<br>(-31 to 89)   | 7<br>(-1 to 19)    | 1<br>(-20 to 26)   | 4<br>(0 to 11)   | 8<br>(1 to 16)     | -1<br>(-3 to 2) | 3<br>(-6 to 13)   |
|                         | <i>+industry response</i> | 6<br>(-13 to 36)    | 41<br>(-9 to 115)   | 9<br>(1 to 21)     | 5<br>(-15 to 31)   | 6<br>(1 to 12)   | 10<br>(4 to 19)    | 0<br>(-2 to 3)  | 4<br>(-5 to 14)   |
|                         |                           |                     |                     |                    |                    |                  |                    |                 |                   |
| <b>Thyroid</b>          |                           |                     |                     |                    |                    |                  |                    |                 |                   |
| Age                     | <i>consumer behavior</i>  | 374 (114 to 751)    |                     | 10 (-69 to 125)    |                    | 84 (44 to 144)   |                    | 34 (7 to 68)    |                   |
|                         | <i>+industry response</i> | 683 (349 to 1130)   |                     | 67 (-17 to 200)    |                    | 117 (70 to 187)  |                    | 52 (22 to 91)   |                   |
| Race/Ethnicity          |                           |                     |                     |                    |                    |                  |                    |                 |                   |
| Non-Hispanic White      | <i>consumer behavior</i>  | 96<br>(-59 to 382)  | 52<br>(-59 to 273)  | -28<br>(-85 to 56) | -15<br>(-64 to 58) | 21<br>(1 to 62)  | 28<br>(1 to 73)    | 20<br>(2 to 47) | 8<br>(-9 to 31)   |
|                         | <i>+industry response</i> | 205<br>(-15 to 563) | 131<br>(-26 to 395) | -8<br>(-63 to 92)  | 3<br>(-43 to 85)   | 33<br>(5 to 80)  | 40<br>(12 to 90)   | 28<br>(9 to 58) | 14<br>(-3 to 40)  |
| Non-Hispanic Black      | <i>consumer behavior</i>  | 29<br>(-10 to 113)  | 7<br>(-10 to 36)    | 8<br>(-1 to 24)    | 3<br>(-3 to 12)    | 12<br>(6 to 22)  | 2<br>(-2 to 8)     | 1<br>(-2 to 5)  | 1<br>(0 to 2)     |
|                         | <i>+industry response</i> | 52<br>(-1 to 153)   | 16<br>(-4 to 50)    | 12<br>(2 to 30)    | 5<br>(-1 to 15)    | 14<br>(8 to 26)  | 3<br>(-1 to 10)    | 2<br>(0 to 7)   | 2<br>(1 to 3)     |
| Hispanic                | <i>consumer behavior</i>  | 68<br>(1 to 201)    | 59<br>(6 to 151)    | 15<br>(-5 to 39)   | 13<br>(2 to 30)    | 2<br>(-4 to 12)  | 4<br>(0 to 9)      | 2<br>(-1 to 6)  | 0<br>(-1 to 3)    |
|                         | <i>+industry response</i> | 113<br>(22 to 276)  | 84<br>(26 to 189)   | 21<br>(2 to 48)    | 16<br>(6 to 35)    | 4<br>(-2 to 15)  | 5<br>(2 to 12)     | 3<br>(0 to 8)   | 1<br>(-1 to 3)    |
| Other                   | <i>consumer behavior</i>  | -4<br>(-38 to 59)   | 13<br>(-13 to 56)   | 6<br>(-4 to 20)    | 1<br>(-7 to 12)    | 5<br>(2 to 10)   | 5<br>(3 to 8)      | -1<br>(-2 to 1) | 0<br>(-2 to 3)    |
|                         | <i>+industry response</i> | 12<br>(-25 to 82)   | 23<br>(-2 to 70)    | 8<br>(-1 to 23)    | 3<br>(-5 to 14)    | 6<br>(3 to 11)   | 6<br>(4 to 9)      | 0<br>(-2 to 2)  | 1<br>(-1 to 4)    |
| <b>Multiple Myeloma</b> |                           |                     |                     |                    |                    |                  |                    |                 |                   |
| Age                     | <i>consumer behavior</i>  | 370 (113 to 743)    |                     | 78 (-46 to 242)    |                    | 181 (85 to 308)  |                    | 63 (7 to 128)   |                   |
|                         | <i>+industry response</i> | 653 (327 to 1120)   |                     | 164 (29 to 357)    |                    | 243 (142 to 385) |                    | 97 (41 to 169)  |                   |
| Race/Ethnicity          |                           |                     |                     |                    |                    |                  |                    |                 |                   |
| Non-Hispanic White      | <i>consumer behavior</i>  | 27<br>(-34 to 138)  | 102<br>(-61 to 375) | -14<br>(-50 to 50) | -4<br>(-96 to 139) | 24<br>(3 to 67)  | 96<br>(25 to 204)  | 20<br>(1 to 52) | 23<br>(-23 to 83) |
|                         | <i>+industry response</i> | 64<br>(-22 to 204)  | 207<br>(0 to 544)   | -1<br>(-38 to 74)  | 29<br>(-60 to 199) | 36<br>(9 to 87)  | 125<br>(52 to 246) | 28<br>(8 to 65) | 39<br>(-5 to 111) |

|                                 |                           |                   |                     |                   |                     |                  |                    |                 |                    |
|---------------------------------|---------------------------|-------------------|---------------------|-------------------|---------------------|------------------|--------------------|-----------------|--------------------|
| Non-Hispanic Black              | <i>consumer behavior</i>  | 39<br>(-9 to 135) | 22<br>(-63 to 178)  | 14<br>(-1 to 43)  | 27<br>(-15 to 95)   | 19<br>(4 to 45)  | 11<br>(-22 to 60)  | 4<br>(-4 to 17) | 10<br>(2 to 22)    |
|                                 | <i>+industry response</i> | 66<br>(1 to 183)  | 65<br>(-30 to 242)  | 22<br>(4 to 55)   | 38<br>(-3 to 113)   | 24<br>(9 to 54)  | 18<br>(-13 to 71)  | 6<br>(-1 to 20) | 13<br>(5 to 26)    |
| Hispanic                        | <i>consumer behavior</i>  | 26<br>(0 to 79)   | 111<br>(12 to 277)  | 7<br>(-5 to 24)   | 25<br>(-3 to 68)    | 2<br>(-4 to 11)  | 15<br>(3 to 32)    | 2<br>(-1 to 7)  | 0<br>(-5 to 7)     |
|                                 | <i>+industry response</i> | 43<br>(6 to 110)  | 154<br>(50 to 340)  | 10<br>(0 to 30)   | 33<br>(6 to 82)     | 4<br>(-2 to 15)  | 19<br>(8 to 39)    | 3<br>(0 to 9)   | 1<br>(-3 to 9)     |
| Other                           | <i>consumer behavior</i>  | 0<br>(-7 to 11)   | 8<br>(-11 to 41)    | 7<br>(3 to 12)    | 0<br>(-10 to 12)    | 1<br>(1 to 4)    | 4<br>(1 to 9)      | -0<br>(-1 to 1) | 1<br>(-3 to 6)     |
|                                 | <i>+industry response</i> | 2<br>(-4 to 16)   | 16<br>(-3 to 53)    | 8<br>(4 to 13)    | 1<br>(-8 to 15)     | 2<br>(0 to 5)    | 5<br>(2 to 11)     | 0<br>(-1 to 1)  | 1<br>(-2 to 6)     |
| <b>Stomach (Gastric Cardia)</b> |                           |                   |                     |                   |                     |                  |                    |                 |                    |
| Age                             | <i>consumer behavior</i>  | 338 (49 to 803)   |                     | 58 (-99 to 264)   |                     | 182 (70 to 347)  |                    | 54 (-19 to 149) |                    |
|                                 | <i>+industry response</i> | 607 (241 to 1140) |                     | 141 (-20 to 378)  |                     | 240 (129 to 420) |                    | 86 (15 to 190)  |                    |
| Race/Ethnicity                  |                           |                   |                     |                   |                     |                  |                    |                 |                    |
| Non-Hispanic White              | <i>consumer behavior</i>  | 18<br>(-19 to 77) | 208<br>(-55 to 648) | -9<br>(-31 to 25) | 24<br>(-128 to 233) | 15<br>(4 to 37)  | 145<br>(35 to 304) | 14<br>(3 to 28) | 34<br>(-36 to 124) |
|                                 | <i>+industry response</i> | 43<br>(-6 to 117) | 380<br>(51 to 886)  | -1<br>(-24 to 38) | 86<br>(-67 to 322)  | 22<br>(9 to 47)  | 187<br>(77 to 364) | 18<br>(8 to 35) | 58<br>(-9 to 160)  |
| Non-Hispanic Black              | <i>consumer behavior</i>  | 7<br>(-2 to 21)   | 6<br>(-19 to 44)    | 2<br>(0 to 6)     | 7<br>(-5 to 24)     | 3<br>(1 to 7)    | 3<br>(-6 to 15)    | 0<br>(0 to 2)   | 3<br>(1 to 5)      |
|                                 | <i>+industry response</i> | 12<br>(2 to 28)   | 19<br>(-8 to 62)    | 3<br>(1 to 7)     | 10<br>(-2 to 29)    | 4<br>(2 to 8)    | 5<br>(-4 to 17)    | 1<br>(0 to 2)   | 3<br>(2 to 6)      |
| Hispanic                        | <i>consumer behavior</i>  | 15<br>(1 to 39)   | 63<br>(-7 to 170)   | 5<br>(0 to 13)    | 16<br>(-4 to 45)    | 1<br>(-2 to 5)   | 7<br>(0 to 18)     | 1<br>(0 to 3)   | 1<br>(-3 to 5)     |
|                                 | <i>+industry response</i> | 24<br>(6 to 52)   | 95<br>(21 to 214)   | 7<br>(2 to 16)    | 22<br>(3 to 54)     | 2<br>(-1 to 6)   | 10<br>(3 to 23)    | 1<br>(0 to 3)   | 2<br>(-2 to 7)     |
| Other                           | <i>consumer behavior</i>  | -1<br>(-7 to 10)  | 5<br>(-14 to 34)    | 5<br>(2 to 9)     | 0<br>(-8 to 12)     | 1<br>(0 to 3)    | 4<br>(1 to 9)      | 0<br>(-1 to 1)  | 1<br>(-3 to 6)     |
|                                 | <i>+industry response</i> | 2<br>(-5 to 14)   | 12<br>(-7 to 46)    | 6<br>(3 to 10)    | 2<br>(-6 to 15)     | 2<br>(0 to 4)    | 5<br>(2 to 10)     | 0<br>(-1 to 1)  | 2<br>(-2 to 7)     |
| <b>Gallbladder</b>              |                           |                   |                     |                   |                     |                  |                    |                 |                    |
| Age                             | <i>consumer behavior</i>  | 161 (67 to 263)   |                     | 51 (8 to 100)     |                     | 76 (47 to 109)   |                    | 29 (11 to 51)   |                    |
|                                 | <i>+industry response</i> | 282 (181 to 396)  |                     | 86 (43 to 138)    |                     | 101 (73 to 137)  |                    | 44 (25 to 66)   |                    |

|                          |                           |                   |                    |                  |                     |                  |                    |                 |                   |
|--------------------------|---------------------------|-------------------|--------------------|------------------|---------------------|------------------|--------------------|-----------------|-------------------|
| <b>Race/Ethnicity</b>    |                           |                   |                    |                  |                     |                  |                    |                 |                   |
| Non-Hispanic White       | <i>consumer behavior</i>  | 24<br>(-10 to 71) | 19<br>(-13 to 61)  | 0<br>(-25 to 30) | 1.97<br>(-17 to 24) | 19<br>(5 to 38)  | 23<br>(6 to 42)    | 16<br>(3 to 31) | 6<br>(-5 to 17)   |
|                          | <i>+industry response</i> | 47<br>(10 to 99)  | 39<br>(5 to 88)    | 9<br>(-16 to 42) | 9<br>(-10 to 34)    | 27<br>(12 to 48) | 29<br>(13 to 50)   | 21<br>(8 to 37) | 9<br>(-1 to 21)   |
| Non-Hispanic Black       | <i>consumer behavior</i>  | 27<br>(-6 to 70)  | 2<br>(-17 to 26)   | 11<br>(0 to 24)  | 6<br>(-4 to 18)     | 14<br>(4 to 26)  | 4<br>(-4 to 12)    | 2<br>(-2 to 7)  | 2<br>(0 to 4)     |
|                          | <i>+industry response</i> | 45<br>(11 to 93)  | 11<br>(-8 to 38)   | 15<br>(4 to 29)  | 9<br>(-1 to 21)     | 17<br>(8 to 30)  | 5<br>(-2 to 14)    | 4<br>(-1 to 9)  | 3<br>(1 to 5)     |
| Hispanic                 | <i>consumer behavior</i>  | 32<br>(2 to 73)   | 42<br>(-10 to 106) | 10<br>(-4 to 26) | 14<br>(-2 to 34)    | 3<br>(-5 to 11)  | 7<br>(1 to 15)     | 3<br>(-1 to 7)  | 0<br>(-3 to 4)    |
|                          | <i>+industry response</i> | 53<br>(19 to 96)  | 65<br>(11 to 130)  | 15<br>(1 to 31)  | 19<br>(3 to 39)     | 5<br>(-2 to 14)  | 9<br>(3 to 18)     | 4<br>(1 to 9)   | 1<br>(-2 to 5)    |
| Other                    | <i>consumer behavior</i>  | 0<br>(-11 to 18)  | 3<br>(-6 to 15)    | 6<br>(1 to 13)   | 0<br>(-4 to 5)      | 3<br>(0 to 7)    | 3<br>(1 to 5)      | 0<br>(-1 to 1)  | 1<br>(-1 to 3)    |
|                          | <i>+industry response</i> | 5<br>(-7 to 24)   | 7<br>(-2 to 19)    | 7<br>(2 to 14)   | 1<br>(-3 to 6)      | 4<br>(1 to 8)    | 3<br>(1 to 5)      | 0<br>(-1 to 2)  | 1<br>(-1 to 3)    |
| <b>Advanced Prostate</b> |                           |                   |                    |                  |                     |                  |                    |                 |                   |
| Age                      | <i>consumer behavior</i>  | 163 (9 to 360)    |                    | 37 (-54 to 146)  |                     | 106 (33 to 194)  |                    | 35 (-14 to 91)  |                   |
|                          | <i>+industry response</i> | 300 (130 to 507)  |                    | 85 (-6 to 203)   |                     | 142 (67 to 240)  |                    | 56 (9 to 119)   |                   |
| <b>Race/Ethnicity</b>    |                           |                   |                    |                  |                     |                  |                    |                 |                   |
| Non-Hispanic White       | <i>consumer behavior</i>  | 0                 | 86<br>(-24 to 267) | 0                | -1<br>(-80 to 98)   | 0                | 75<br>(9 to 162)   | 0               | 24<br>(-23 to 80) |
|                          | <i>+industry response</i> | 0                 | 162<br>(32 to 350) | 0                | 30<br>(-48 to 144)  | 0                | 100<br>(36 to 199) | 0               | 40<br>(-5 to 102) |
| Non-Hispanic Black       | <i>consumer behavior</i>  | 0                 | 3<br>(-61 to 97)   | 0                | 21<br>(-17 to 69)   | 0                | 16<br>(-13 to 51)  | 0               | 8<br>(2 to 17)    |
|                          | <i>+industry response</i> | 0                 | 34<br>(-33 to 145) | 0                | 31<br>(-5 to 83)    | 0                | 22<br>(-7 to 57)   | 0               | 11<br>(4 to 20)   |
| Hispanic                 | <i>consumer behavior</i>  | 0                 | 59<br>(8 to 133)   | 0                | 13<br>(-3 to 37)    | 0                | 9<br>(2 to 20)     | 0               | 1<br>(-3 to 5)    |
|                          | <i>+industry response</i> | 0                 | 82<br>(28 to 163)  | 0                | 18<br>(1 to 44)     | 0                | 12<br>(5 to 23)    | 0               | 2<br>(-2 to 7)    |
| Other                    | <i>consumer behavior</i>  | 0                 | 3<br>(-10 to 21)   | 0                | 0<br>(-7 to 8)      | 0                | 4<br>(2 to 8)      | 0               | 1<br>(-3 to 5)    |
|                          | <i>+industry response</i> | 0                 | 8<br>(-5 to 28)    | 0                | 1<br>(-5 to 9)      | 0                | 5<br>(3 to 9)      | 0               | 2<br>(-2 to 6)    |

**Ovarian**

|                    |                           |                 |   |                |   |               |   |               |   |
|--------------------|---------------------------|-----------------|---|----------------|---|---------------|---|---------------|---|
| Age                | <i>consumer behavior</i>  | 66 (-10 to 180) |   | 16 (-20 to 75) |   | 31 (11 to 69) |   | 28 (11 to 61) |   |
|                    | <i>+industry response</i> | 129 (16 to 277) |   | 33 (-6 to 102) |   | 45 (17 to 87) |   | 37 (19 to 75) |   |
| Race/Ethnicity     |                           |                 |   |                |   |               |   |               |   |
| Non-Hispanic White | <i>consumer behavior</i>  | 34 (-25 to 147) | 0 | -4 (-38 to 54) | 0 | 20 (2 to 55)  | 0 | 25 (8 to 57)  | 0 |
|                    | <i>+industry response</i> | 71 (-23 to 220) | 0 | 7 (-30 to 72)  | 0 | 30 (6 to 71)  | 0 | 32 (15 to 70) | 0 |
| Non-Hispanic Black | <i>consumer behavior</i>  | 11 (-5 to 41)   | 0 | 4 (0 to 13)    | 0 | 6 (3 to 13)   | 0 | 1 (-1 to 5)   | 0 |
|                    | <i>+industry response</i> | 19 (-3 to 56)   | 0 | 6 (0 to 17)    | 0 | 8 (4 to 16)   | 0 | 2 (0 to 6)    | 0 |
| Hispanic           | <i>consumer behavior</i>  | 21 (-2 to 67)   | 0 | 8 (-1 to 21)   | 0 | 1 (-3 to 8)   | 0 | 1 (-1 to 5)   | 0 |
|                    | <i>+industry response</i> | 34 (1 to 91)    | 0 | 11 (3 to 26)   | 0 | 3 (-1 to 10)  | 0 | 2 (0 to 6)    | 0 |
| Other              | <i>consumer behavior</i>  | -8 (-19 to 13)  | 0 | 6 (2 to 13)    | 0 | 2 (1 to 5)    | 0 | 0 (-1 to 1)   | 0 |
|                    | <i>+industry response</i> | -3 (-15 to 21)  | 0 | 7 (3 to 14)    | 0 | 3 (1 to 6)    | 0 | 0 (-1 to 2)   | 0 |

1. Values are the median estimates (95% uncertainty intervals) of each distribution of 1000 simulations.

**Supplementary Table 11.** Estimated cancer deaths reduced by the federal menu calorie labeling in the US by age, sex, race/ethnicity, and cancer type, over a lifetime (U.S. population=235,162,844)<sup>1</sup>

| Cancer Type                    | Policy Scenario           | 20-44 y                |                        | 45-54 y              |                       | 55-64 y             |                      | 65 + y             |                     |
|--------------------------------|---------------------------|------------------------|------------------------|----------------------|-----------------------|---------------------|----------------------|--------------------|---------------------|
|                                |                           | Female                 | Male                   | Female               | Male                  | Female              | Male                 | Female             | Male                |
| <b>Breast (Postmenopausal)</b> |                           |                        |                        |                      |                       |                     |                      |                    |                     |
| Age                            | <i>consumer behavior</i>  | 2490 (260 to 4980)     |                        | 151 (-204 to 521)    |                       | 285 (129 to 479)    |                      | 126 (30 to 227)    |                     |
|                                | <i>+industry response</i> | 4610 (2290 to 7240)    |                        | 336 (-26 to 725)     |                       | 396 (237 to 598)    |                      | 178 (82 to 284)    |                     |
| Race/Ethnicity                 |                           |                        |                        |                      |                       |                     |                      |                    |                     |
| Non-Hispanic White             | <i>consumer behavior</i>  | 1350<br>(-652 to 3690) | 0                      | -55<br>(-373 to 278) | 0                     | 165<br>(33 to 327)  | 0                    | 103<br>(10 to 204) | 0                   |
|                                | <i>+industry response</i> | 2620<br>(480 to 5150)  | 0                      | 54<br>(-264 to 419)  | 0                     | 238<br>(105 to 401) | 0                    | 139<br>(47 to 244) | 0                   |
| Non-Hispanic Black             | <i>consumer behavior</i>  | 560<br>(-109 to 1280)  | 0                      | 85<br>(-11 to 200)   | 0                     | 95<br>(32 to 173)   | 0                    | 13<br>(-12 to 40)  | 0                   |
|                                | <i>+industry response</i> | 901<br>(238 to 1660)   | 0                      | 126<br>(26 to 247)   | 0                     | 117<br>(53 to 196)  | 0                    | 21<br>(-4 to 49)   | 0                   |
| Hispanic                       | <i>consumer behavior</i>  | 572<br>(45 to 1180)    | 0                      | 76<br>(-7 to 163)    | 0                     | 9<br>(-21 to 44)    | 0                    | 10<br>(-3 to 24)   | 0                   |
|                                | <i>+industry response</i> | 922<br>(364 to 1570)   | 0                      | 104<br>(21 to 193)   | 0                     | 21<br>(-9 to 57)    | 0                    | 15<br>(2 to 30)    | 0                   |
| Other                          | <i>consumer behavior</i>  | 0<br>(-306 to 378)     | 0                      | 39<br>(9 to 76)      | 0                     | 15<br>(2 to 31)     | 0                    | -1<br>(-6 to 3)    | 0                   |
|                                | <i>+industry response</i> | 125<br>(-185 to 532)   | 0                      | 45<br>(16 to 84)     | 0                     | 19<br>(6 to 35)     | 0                    | 0<br>(-5 to 5)     | 0                   |
| <b>Liver</b>                   |                           |                        |                        |                      |                       |                     |                      |                    |                     |
| Age                            | <i>consumer behavior</i>  | 2840 (897 to 4890)     |                        | 628 (-181 to 1570)   |                       | 852 (411 to 1340)   |                      | 227 (18 to 455)    |                     |
|                                | <i>+industry response</i> | 4900 (2760 to 7190)    |                        | 1200 (345 to 2210)   |                       | 1140 (689 to 1650)  |                      | 357 (146 to 587)   |                     |
| Race/Ethnicity                 |                           |                        |                        |                      |                       |                     |                      |                    |                     |
| Non-Hispanic White             | <i>consumer behavior</i>  | 139<br>(-108 to 504)   | 1040<br>(-237 to 2780) | 15<br>(-147 to 207)  | -70<br>(-749 to 722)  | 98<br>(31 to 196)   | 440<br>(93 to 858)   | 63<br>(6 to 130)   | 97<br>(-88 to 297)  |
|                                | <i>+industry response</i> | 310<br>(42 to 719)     | 1900<br>(449 to 3830)  | 67<br>(-93 to 276)   | 199<br>(-478 to 1040) | 137<br>(67 to 240)  | 565<br>(241 to 1020) | 85<br>(30 to 159)  | 161<br>(-18 to 369) |

|                    |                           |                     |                       |                    |                      |                   |                     |                  |                   |
|--------------------|---------------------------|---------------------|-----------------------|--------------------|----------------------|-------------------|---------------------|------------------|-------------------|
| Non-Hispanic Black | <i>consumer behavior</i>  | 134<br>(-25 to 317) | 72<br>(-601 to 932)   | 49<br>(3 to 110)   | 193<br>(-133 to 632) | 43<br>(12 to 85)  | 100<br>(-95 to 336) | 6<br>(-6 to 22)  | 29<br>(-4 to 69)  |
|                    | <i>+industry response</i> | 214<br>(51 to 425)  | 382<br>(-273 to 1280) | 68<br>(23 to 133)  | 276<br>(-37 to 729)  | 54<br>(24 to 97)  | 139<br>(-49 to 377) | 10<br>(-2 to 27) | 41<br>(8 to 83)   |
| Hispanic           | <i>consumer behavior</i>  | 199<br>(17 to 473)  | 1020<br>(88 to 2210)  | 87<br>(2 to 189)   | 285<br>(13 to 630)   | 12<br>(-26 to 62) | 99<br>(18 to 201)   | 15<br>(-4 to 35) | 6<br>(-28 to 46)  |
|                    | <i>+industry response</i> | 316<br>(111 to 623) | 1430<br>(482 to 2690) | 116<br>(31 to 223) | 365<br>(94 to 729)   | 26<br>(-11 to 78) | 131<br>(48 to 242)  | 21<br>(3 to 43)  | 17<br>(-15 to 59) |
| Other              | <i>consumer behavior</i>  | 2<br>(-47 to 68)    | 90<br>(-110 to 339)   | 32<br>(7 to 65)    | -2<br>(-88 to 108)   | 12<br>(0 to 28)   | 30<br>(4 to 61)     | 0<br>(-6 to 6)   | 7<br>(-22 to 42)  |
|                    | <i>+industry response</i> | 22<br>(-28 to 93)   | 168<br>(-26 to 434)   | 36<br>(13 to 71)   | 15<br>(-70 to 130)   | 16<br>(4 to 32)   | 39<br>(14 to 74)    | 1<br>(-4 to 8)   | 11<br>(-18 to 46) |

**Endometrial**

|                    |                           |                       |   |                      |   |                     |   |                    |   |
|--------------------|---------------------------|-----------------------|---|----------------------|---|---------------------|---|--------------------|---|
| Age                | <i>consumer behavior</i>  | 1190 (309 to 2140)    |   | 251 (-248 to 785)    |   | 394 (177 to 659)    |   | 213 (51 to 378)    |   |
|                    | <i>+industry response</i> | 2100 (1200 to 3110)   |   | 512 (26 to 1060)     |   | 548 (325 to 817)    |   | 302 (139 to 472)   |   |
| Race/Ethnicity     |                           |                       |   |                      |   |                     |   |                    |   |
| Non-Hispanic White | <i>consumer behavior</i>  | 440<br>(-210 to 1170) | 0 | -42<br>(-511 to 440) | 0 | 206<br>(36 to 399)  | 0 | 173<br>(13 to 319) | 0 |
|                    | <i>+industry response</i> | 858<br>(218 to 1620)  | 0 | 114<br>(-351 to 606) | 0 | 298<br>(127 to 491) | 0 | 234<br>(76 to 388) | 0 |
| Non-Hispanic Black | <i>consumer behavior</i>  | 412<br>(-90 to 937)   | 0 | 139<br>(-9 to 293)   | 0 | 157<br>(42 to 295)  | 0 | 26<br>(-24 to 83)  | 0 |
|                    | <i>+industry response</i> | 666<br>(177 to 1210)  | 0 | 201<br>(51 to 361)   | 0 | 195<br>(81 to 338)  | 0 | 42<br>(-8 to 97)   | 0 |
| Hispanic           | <i>consumer behavior</i>  | 315<br>(22 to 645)    | 0 | 105<br>(-22 to 222)  | 0 | 16<br>(-33 to 70)   | 0 | 19<br>(-7 to 44)   | 0 |
|                    | <i>+industry response</i> | 505<br>(197 to 854)   | 0 | 144<br>(21 to 261)   | 0 | 34<br>(-14 to 89)   | 0 | 28<br>(3 to 54)    | 0 |
| Other              | <i>consumer behavior</i>  | 8<br>(-99 to 139)     | 0 | 51<br>(13 to 99)     | 0 | 17<br>(1 to 36)     | 0 | -3<br>(-10 to 5)   | 0 |
|                    | <i>+industry response</i> | 50<br>(-56 to 187)    | 0 | 58<br>(21 to 107)    | 0 | 22<br>(6 to 41)     | 0 | 0<br>(-8 to 7)     | 0 |

**Kidney (Renal Cell)**

|                |                           |                     |  |                   |  |                  |  |                  |  |
|----------------|---------------------------|---------------------|--|-------------------|--|------------------|--|------------------|--|
| Age            | <i>consumer behavior</i>  | 1050 (284 to 1830)  |  | 263 (-153 to 695) |  | 506 (225 to 778) |  | 182 (20 to 338)  |  |
|                | <i>+industry response</i> | 1880 (1100 to 2680) |  | 539 (106 to 977)  |  | 679 (402 to 954) |  | 276 (112 to 429) |  |
| Race/Ethnicity |                           |                     |  |                   |  |                  |  |                  |  |

|                    |                           |                     |                      |                      |                      |                    |                     |                   |                     |
|--------------------|---------------------------|---------------------|----------------------|----------------------|----------------------|--------------------|---------------------|-------------------|---------------------|
| Non-Hispanic White | <i>consumer behavior</i>  | 57<br>(-23 to 159)  | 332<br>(-183 to 922) | -16<br>(-128 to 106) | 26<br>(-351 to 396)  | 72<br>(14 to 138)  | 287<br>(42 to 525)  | 66<br>(9 to 124)  | 81<br>(-68 to 219)  |
|                    | <i>+industry response</i> | 111<br>(27 to 224)  | 663<br>(123 to 1280) | 22<br>(-90 to 146)   | 168<br>(-199 to 552) | 105<br>(46 to 171) | 378<br>(138 to 623) | 89<br>(33 to 148) | 133<br>(-12 to 272) |
| Non-Hispanic Black | <i>consumer behavior</i>  | 67<br>(-16 to 162)  | 48<br>(-225 to 326)  | 24<br>(-2 to 53)     | 59<br>(-40 to 171)   | 30<br>(10 to 56)   | 35<br>(-32 to 106)  | 5<br>(-5 to 16)   | 16<br>(3 to 28)     |
|                    | <i>+industry response</i> | 113<br>(25 to 218)  | 174<br>(-96 to 461)  | 34<br>(9 to 64)      | 87<br>(-14 to 199)   | 37<br>(17 to 63)   | 49<br>(-17 to 121)  | 8<br>(-2 to 20)   | 20<br>(7 to 33)     |
| Hispanic           | <i>consumer behavior</i>  | 111<br>(9 to 229)   | 367<br>(0 to 792)    | 30<br>(-3 to 62)     | 118<br>(-15 to 261)  | 6<br>(-13 to 29)   | 47<br>(5 to 98)     | 7<br>(-2 to 17)   | 4<br>(-12 to 23)    |
|                    | <i>+industry response</i> | 177<br>(67 to 305)  | 522<br>(168 to 968)  | 40<br>(8 to 74)      | 157<br>(23 to 303)   | 13<br>(-5 to 36)   | 64<br>(22 to 116)   | 11<br>(1 to 21)   | 9<br>(-7 to 28)     |
| Other              | <i>consumer behavior</i>  | 3<br>(-23 to 34)    | 33<br>(-40 to 122)   | 15<br>(5 to 28)      | 0<br>(-28 to 33)     | 5<br>(1 to 11)     | 16<br>(5 to 29)     | -1<br>(-3 to 2)   | 4<br>(-8 to 17)     |
|                    | <i>+industry response</i> | 13<br>(-12 to 45)   | 63<br>(-10 to 156)   | 17<br>(7 to 30)      | 6<br>(-22 to 39)     | 6<br>(2 to 12)     | 20<br>(9 to 33)     | 0<br>(-2 to 3)    | 5<br>(-6 to 18)     |
| <b>Pancreatic</b>  |                           |                     |                      |                      |                      |                    |                     |                   |                     |
| Age                | <i>consumer behavior</i>  | 656 (220 to 1160)   |                      | 74 (-166 to 350)     |                      | 362 (175 to 581)   |                     | 131 (20 to 250)   |                     |
|                    | <i>+industry response</i> | 1160 (707 to 1730)  |                      | 243 (1 to 535)       |                      | 483 (293 to 708)   |                     | 199 (87 to 321)   |                     |
| Race/Ethnicity     |                           |                     |                      |                      |                      |                    |                     |                   |                     |
| Non-Hispanic White | <i>consumer behavior</i>  | 101<br>(-40 to 310) | 213<br>(-100 to 659) | -44<br>(-143 to 78)  | -13<br>(-216 to 221) | 79<br>(24 to 158)  | 193<br>(44 to 384)  | 56<br>(3 to 117)  | 50<br>(-45 to 162)  |
|                    | <i>+industry response</i> | 196<br>(42 to 425)  | 420<br>(85 to 911)   | -10<br>(-111 to 120) | 67<br>(-140 to 326)  | 111<br>(51 to 198) | 250<br>(102 to 448) | 78<br>(25 to 146) | 84<br>(-10 to 203)  |
| Non-Hispanic Black | <i>consumer behavior</i>  | 48<br>(-7 to 125)   | 16<br>(-72 to 117)   | 22<br>(-1 to 49)     | 27<br>(-18 to 78)    | 29<br>(8 to 57)    | 18<br>(-15 to 56)   | 5<br>(-5 to 17)   | 9<br>(1 to 17)      |
|                    | <i>+industry response</i> | 78<br>(18 to 162)   | 57<br>(-33 to 164)   | 31<br>(9 to 62)      | 39<br>(-3 to 91)     | 36<br>(15 to 65)   | 24<br>(-8 to 63)    | 8<br>(-1 to 20)   | 12<br>(4 to 19)     |
| Hispanic           | <i>consumer behavior</i>  | 55<br>(5 to 118)    | 175<br>(13 to 374)   | 24<br>(-4 to 53)     | 42<br>(-5 to 97)     | 4<br>(-10 to 20)   | 16<br>(-2 to 40)    | 5<br>(-2 to 13)   | 1<br>(-7 to 10)     |
|                    | <i>+industry response</i> | 88<br>(33 to 158)   | 245<br>(83 to 462)   | 32<br>(6 to 63)      | 57<br>(10 to 113)    | 9<br>(-5 to 25)    | 23<br>(5 to 48)     | 8<br>(1 to 16)    | 4<br>(-4 to 13)     |
| Other              | <i>consumer behavior</i>  | -2<br>(-23 to 25)   | 16<br>(-23 to 63)    | 14<br>(3 to 27)      | 0<br>(-18 to 20)     | 7<br>(1 to 14)     | 9<br>(3 to 17)      | 0<br>(-3 to 3)    | 2<br>(-5 to 11)     |
|                    | <i>+industry response</i> | 7<br>(-14 to 36)    | 32<br>(-7 to 82)     | 16<br>(6 to 30)      | 3<br>(-14 to 24)     | 9<br>(2 to 16)     | 11<br>(5 to 19)     | 1<br>(-2 to 4)    | 3<br>(-4 to 12)     |



**Esophageal Adenocarcinoma**

|                    |                           |                    |                       |                   |                      |                  |                     |                  |                     |
|--------------------|---------------------------|--------------------|-----------------------|-------------------|----------------------|------------------|---------------------|------------------|---------------------|
| Age                | <i>consumer behavior</i>  | 631 (33 to 1320)   |                       | 78 (-255 to 423)  |                      | 348 (113 to 584) |                     | 101 (-42 to 239) |                     |
|                    | <i>+industry response</i> | 1150 (520 to 1870) |                       | 246 (-96 to 601)  |                      | 457 (225 to 699) |                     | 161 (19 to 302)  |                     |
| Race/Ethnicity     |                           |                    |                       |                   |                      |                  |                     |                  |                     |
| Non-Hispanic White | <i>consumer behavior</i>  | 40<br>(-23 to 112) | 366<br>(-206 to 1000) | -8<br>(-47 to 36) | 24<br>(-314 to 359)  | 24<br>(6 to 47)  | 283<br>(55 to 516)  | 22<br>(4 to 41)  | 71<br>(-65 to 202)  |
|                    | <i>+industry response</i> | 81<br>(15 to 160)  | 732<br>(157 to 1400)  | 5<br>(-34 to 51)  | 152<br>(-176 to 495) | 35<br>(16 to 59) | 366<br>(142 to 602) | 28<br>(11 to 48) | 119<br>(-13 to 253) |
| Non-Hispanic Black | <i>consumer behavior</i>  | 9<br>(-1 to 20)    | 9<br>(-25 to 45)      | 3<br>(0 to 7)     | 10<br>(-6 to 28)     | 4<br>(1 to 8)    | 6<br>(-6 to 18)     | 1<br>(-1 to 2)   | 3<br>(0 to 5)       |
|                    | <i>+industry response</i> | 14<br>(3 to 26)    | 25<br>(-10 to 62)     | 4<br>(1 to 8)     | 14<br>(-2 to 33)     | 5<br>(2 to 9)    | 8<br>(-3 to 21)     | 1<br>(0 to 3)    | 4<br>(1 to 6)       |
| Hispanic           | <i>consumer behavior</i>  | 25<br>(2 to 52)    | 164<br>(2 to 354)     | 3<br>(-1 to 13)   | 40<br>(-7 to 99)     | 1<br>(-3 to 7)   | 21<br>(3 to 42)     | 1<br>(-1 to 4)   | 1<br>(-6 to 10)     |
|                    | <i>+industry response</i> | 40<br>(15 to 68)   | 235<br>(70 to 425)    | 5<br>(0 to 16)    | 55<br>(6 to 114)     | 3<br>(-1 to 8)   | 28<br>(10 to 50)    | 2<br>(0 to 4)    | 4<br>(-4 to 12)     |
| Other              | <i>consumer behavior</i>  | -1<br>(-9 to 10)   | 9<br>(-14 to 35)      | 5<br>(1 to 9)     | -1<br>(-10 to 10)    | 2<br>(0 to 4)    | 6<br>(2 to 10)      | 0<br>(-1 to 1)   | 1<br>(-3 to 7)      |
|                    | <i>+industry response</i> | 3<br>(-6 to 14)    | 18<br>(-5 to 46)      | 6<br>(2 to 10)    | 1<br>(-8 to 12)      | 2<br>(1 to 5)    | 7<br>(3 to 11)      | 0<br>(-1 to 1)   | 2<br>(-3 to 7)      |

**Colorectal**

|                    |                           |                    |                     |                    |                    |                  |                   |                  |                   |
|--------------------|---------------------------|--------------------|---------------------|--------------------|--------------------|------------------|-------------------|------------------|-------------------|
| Age                | <i>consumer behavior</i>  | 430 (139 to 779)   |                     | 56 (-48 to 184)    |                    | 150 (77 to 241)  |                   | 63 (13 to 119)   |                   |
|                    | <i>+industry response</i> | 764 (450 to 1160)  |                     | 133 (23 to 268)    |                    | 203 (126 to 304) |                   | 95 (46 to 153)   |                   |
| Race/Ethnicity     |                           |                    |                     |                    |                    |                  |                   |                  |                   |
| Non-Hispanic White | <i>consumer behavior</i>  | 49<br>(-36 to 181) | 119<br>(-75 to 391) | -21<br>(-65 to 40) | -10<br>(-89 to 97) | 32<br>(7 to 67)  | 72<br>(11 to 150) | 31<br>(6 to 63)  | 22<br>(-17 to 64) |
|                    | <i>+industry response</i> | 106<br>(4 to 261)  | 248<br>(28 to 545)  | -6<br>(-49 to 59)  | 24<br>(-60 to 140) | 46<br>(20 to 85) | 96<br>(36 to 176) | 41<br>(16 to 76) | 35<br>(-3 to 81)  |
| Non-Hispanic Black | <i>consumer behavior</i>  | 26<br>(-7 to 70)   | 27<br>(-36 to 104)  | 8<br>(0 to 21)     | 18<br>(-9 to 53)   | 13<br>(4 to 24)  | 9<br>(-10 to 31)  | 2<br>(-2 to 7)   | 5<br>(0 to 10)    |
|                    | <i>+industry response</i> | 44<br>(9 to 94)    | 58<br>(-7 to 145)   | 12<br>(4 to 26)    | 25.1<br>(-1 to 61) | 15<br>(7 to 27)  | 13<br>(-6 to 36)  | 3<br>(-1 to 9)   | 6<br>(2 to 12)    |
| Hispanic           | <i>consumer behavior</i>  | 36<br>(2 to 88)    | 136<br>(21 to 300)  | 13<br>(0 to 27)    | 37<br>(5 to 74)    | 2<br>(-4 to 10)  | 13<br>(2 to 28)   | 2<br>(-1 to 7)   | 1<br>(-5 to 6)    |

|                                 |                           |                   |                     |                   |                     |                  |                    |                 |                   |
|---------------------------------|---------------------------|-------------------|---------------------|-------------------|---------------------|------------------|--------------------|-----------------|-------------------|
| Other                           | <i>+industry response</i> | 58<br>(17 to 120) | 188<br>(65 to 366)  | 16<br>(5 to 32)   | 45<br>(14 to 84)    | 4<br>(-2 to 13)  | 18<br>(6 to 33)    | 4<br>(0 to 8)   | 2<br>(-3 to 8)    |
|                                 | <i>consumer behavior</i>  | -1<br>(-15 to 20) | 16<br>(-21 to 65)   | 5<br>(-1 to 11)   | 0<br>(-12 to 15)    | 2<br>(0 to 6)    | 5<br>(1 to 9)      | 0<br>(-2 to 1)  | 1<br>(-3 to 6)    |
|                                 | <i>+industry response</i> | 5<br>(-9 to 27)   | 30<br>(-5 to 83)    | 6<br>(1 to 13)    | 2<br>(-9 to 17)     | 3<br>(1 to 7)    | 6<br>(2 to 11)     | 0<br>(-1 to 2)  | 2<br>(-2 to 7)    |
|                                 |                           |                   |                     |                   |                     |                  |                    |                 |                   |
| <b>Stomach (Gastric Cardia)</b> |                           |                   |                     |                   |                     |                  |                    |                 |                   |
| Age                             | <i>consumer behavior</i>  | 286 (45 to 672)   |                     | 50 (-84 to 224)   |                     | 149 (58 to 282)  |                    | 42 (-14 to 113) |                   |
|                                 | <i>+industry response</i> | 513 (196 to 965)  |                     | 120 (-14 to 321)  |                     | 196 (105 to 342) |                    | 67 (13 to 145)  |                   |
| Race/Ethnicity                  |                           |                   |                     |                   |                     |                  |                    |                 |                   |
| Non-Hispanic White              | <i>consumer behavior</i>  | 14<br>(-16 to 63) | 178<br>(-46 to 545) | -7<br>(-26 to 20) | 21<br>(-109 to 194) | 13<br>(4 to 30)  | 118<br>(29 to 248) | 11<br>(3 to 22) | 27<br>(-26 to 95) |
|                                 | <i>+industry response</i> | 34<br>(-5 to 95)  | 322<br>(43 to 766)  | -1<br>(-19 to 30) | 74<br>(-58 to 270)  | 18<br>(7 to 38)  | 152<br>(63 to 296) | 14<br>(6 to 27) | 45<br>(-6 to 121) |
| Non-Hispanic Black              | <i>consumer behavior</i>  | 5<br>(-1 to 17)   | 2<br>(-11 to 29)    | 2<br>(0 to 5)     | 6<br>(-5 to 22)     | 2<br>(1 to 5)    | 3<br>(-5 to 13)    | 0<br>(0 to 1)   | 2<br>(1 to 4)     |
|                                 | <i>+industry response</i> | 9<br>(2 to 22)    | 7<br>(-5 to 43)     | 2<br>(1 to 6)     | 9<br>(-2 to 26)     | 3<br>(2 to 6)    | 4<br>(-3 to 15)    | 1<br>(0 to 2)   | 3<br>(1 to 5)     |
| Hispanic                        | <i>consumer behavior</i>  | 13<br>(1 to 35)   | 57<br>(-6 to 154)   | 5<br>(0 to 12)    | 14<br>(-3 to 38)    | 1<br>(-1 to 4)   | 6<br>(0 to 15)     | 1<br>(0 to 2)   | 0<br>(-2 to 4)    |
|                                 | <i>+industry response</i> | 22<br>(5 to 47)   | 86<br>(20 to 194)   | 6<br>(2 to 14)    | 19<br>(3 to 46)     | 1<br>(-1 to 5)   | 8<br>(2 to 19)     | 1<br>(0 to 3)   | 1<br>(-1 to 6)    |
| Other                           | <i>consumer behavior</i>  | -1<br>(-5 to 7)   | 4<br>(-9 to 25)     | 4<br>(2 to 8)     | 0<br>(-7 to 10)     | 1<br>(0 to 3)    | 3<br>(1 to 7)      | 0<br>(-1 to 1)  | 1<br>(-2 to 5)    |
|                                 | <i>+industry response</i> | 1<br>(-3 to 9)    | 9<br>(-4 to 34)     | 4<br>(2 to 8)     | 2<br>(-5 to 12)     | 1<br>(0 to 3)    | 4<br>(2 to 8)      | 0<br>(0 to 1)   | 1<br>(-2 to 5)    |
| <b>Multiple Myeloma</b>         |                           |                   |                     |                   |                     |                  |                    |                 |                   |
| Age                             | <i>consumer behavior</i>  | 220 (65 to 441)   |                     | 51 (-29 to 150)   |                     | 112 (54 to 186)  |                    | 42 (6 to 84)    |                   |
|                                 | <i>+industry response</i> | 380 (202 to 657)  |                     | 105 (20 to 215)   |                     | 151 (89 to 232)  |                    | 63 (27 to 111)  |                   |
| Race/Ethnicity                  |                           |                   |                     |                   |                     |                  |                    |                 |                   |
| Non-Hispanic White              | <i>consumer behavior</i>  | 11<br>(-13 to 52) | 59<br>(-34 to 221)  | -8<br>(-32 to 31) | -3<br>(-59 to 83)   | 15<br>(2 to 41)  | 58<br>(15 to 123)  | 14<br>(1 to 35) | 15<br>(-14 to 54) |

|                    |                           |            |              |             |              |            |             |            |            |
|--------------------|---------------------------|------------|--------------|-------------|--------------|------------|-------------|------------|------------|
|                    | <i>+industry response</i> | 26         | 122          | -1          | 19           | 22         | 75          | 19         | 26         |
|                    | <i>consumer behavior</i>  | (-7 to 81) | (1 to 321)   | (-23 to 45) | (-37 to 123) | (6 to 53)  | (32 to 147) | (6 to 44)  | (-3 to 71) |
| Non-Hispanic Black | <i>+industry response</i> | 17         | 14           | 10          | 17           | 12         | 7           | 2          | 6          |
|                    | <i>consumer behavior</i>  | (-4 to 63) | (-40 to 115) | (0 to 29)   | (-10 to 59)  | (3 to 28)  | (-14 to 38) | (-3 to 11) | (1 to 12)  |
|                    | <i>+industry response</i> | 29         | 44           | 15          | 24           | 15         | 11          | 4          | 7          |
| Hispanic           | <i>consumer behavior</i>  | (1 to 83)  | (-20 to 159) | (3 to 37)   | (-1 to 70)   | (6 to 34)  | (-8 to 45)  | (-1 to 13) | (3 to 15)  |
|                    | <i>+industry response</i> | 16         | 72           | 5           | 15           | 1          | 10          | 2          | 0          |
|                    | <i>consumer behavior</i>  | (0 to 51)  | (9 to 193)   | (-3 to 17)  | (-2 to 42)   | (-3 to 8)  | (2 to 22)   | (-1 to 5)  | (-3 to 5)  |
|                    | <i>+industry response</i> | 28         | 100          | 7           | 21           | 3          | 13          | 3          | 1          |
| Other              | <i>consumer behavior</i>  | (5 to 71)  | (31 to 244)  | (0 to 21)   | (4 to 51)    | (-1 to 10) | (5 to 26)   | (0 to 6)   | (-2 to 6)  |
|                    | <i>+industry response</i> | 0          | 5            | 4           | 0            | 1          | 3           | 0          | 1          |
|                    | <i>consumer behavior</i>  | (-3 to 6)  | (-7 to 27)   | (2 to 7)    | (-6 to 7)    | (0 to 2)   | (1 to 6)    | (-1 to 1)  | (-2 to 4)  |
|                    | <i>+industry response</i> | 1          | 10           | 4           | 1            | 1          | 4           | 0          | 1          |
|                    | <i>consumer behavior</i>  | (-2 to 8)  | (-2 to 36)   | (2 to 8)    | (-5 to 9)    | (0 to 3)   | (2 to 7)    | (-1 to 1)  | (-1 to 4)  |

**Gallbladder**

|                    |                           |                  |             |                |             |                |            |               |            |
|--------------------|---------------------------|------------------|-------------|----------------|-------------|----------------|------------|---------------|------------|
| Age                | <i>consumer behavior</i>  | 136 (58 to 229)  |             | 44 (7 to 86)   |             | 65 (40 to 93)  |            | 24 (9 to 41)  |            |
|                    | <i>+industry response</i> | 239 (153 to 341) |             | 74 (36 to 119) |             | 86 (61 to 117) |            | 36 (20 to 53) |            |
| Race/Ethnicity     |                           |                  |             |                |             |                |            |               |            |
| Non-Hispanic White | <i>consumer behavior</i>  | 22               | 15          | 0              | 2           | 16             | 19         | 13            | 5          |
|                    | <i>+industry response</i> | (-10 to 64)      | (-10 to 52) | (-23 to 27)    | (-14 to 19) | (4 to 32)      | (6 to 36)  | (2 to 25)     | (-4 to 14) |
|                    | <i>consumer behavior</i>  | 43               | 32          | 8              | 8           | 23             | 24         | 17            | 8          |
| Non-Hispanic Black | <i>+industry response</i> | (9 to 90)        | (4 to 72)   | (-15 to 37)    | (-8 to 27)  | (10 to 40)     | (11 to 42) | (6 to 30)     | (-1 to 18) |
|                    | <i>consumer behavior</i>  | 24               | 2           | 10             | 4           | 12             | 3          | 2             | 2          |
|                    | <i>+industry response</i> | (-5 to 61)       | (-14 to 21) | (0 to 21)      | (-3 to 14)  | (4 to 23)      | (-3 to 10) | (-2 to 6)     | (0 to 3)   |
|                    | <i>consumer behavior</i>  | 40               | 9           | 14             | 6           | 15             | 4          | 3             | 2          |
| Hispanic           | <i>+industry response</i> | (10 to 80)       | (-7 to 31)  | (4 to 27)      | (-1 to 17)  | (7 to 26)      | (-2 to 12) | (0 to 7)      | (1 to 4)   |
|                    | <i>consumer behavior</i>  | 28               | 33          | 9              | 12          | 2              | 6          | 2             | 0          |
|                    | <i>+industry response</i> | (2 to 63)        | (-8 to 85)  | (-4 to 23)     | (-2 to 30)  | (-4 to 10)     | (1 to 13)  | (-1 to 6)     | (-2 to 3)  |
|                    | <i>consumer behavior</i>  | 45               | 51          | 13             | 16          | 4              | 8          | 4             | 1          |
| Other              | <i>+industry response</i> | (16 to 83)       | (9 to 106)  | (1 to 28)      | (3 to 35)   | (-2 to 13)     | (3 to 16)  | (0 to 8)      | (-1 to 4)  |
|                    | <i>consumer behavior</i>  | 0                | 2           | 5              | 0           | 3              | 2          | 0             | 0          |
|                    | <i>+industry response</i> | (-10 to 16)      | (-5 to 12)  | (1 to 11)      | (-2 to 2)   | (0 to 6)       | (1 to 4)   | (-1 to 1)     | (-1 to 2)  |
|                    | <i>consumer behavior</i>  | 4                | 5           | 6              | 0           | 4              | 3          | 0             | 1          |
|                    | <i>+industry response</i> | (-6 to 21)       | (-2 to 15)  | (2 to 12)      | (-1 to 3)   | (1 to 7)       | (1 to 5)   | (-1 to 2)     | (-1 to 2)  |

**Advanced Prostate**

|     |                          |                 |  |                |  |               |  |               |  |
|-----|--------------------------|-----------------|--|----------------|--|---------------|--|---------------|--|
| Age | <i>consumer behavior</i> | 101 (13 to 214) |  | 18 (-17 to 58) |  | 33 (11 to 58) |  | 15 (-4 to 38) |  |
|-----|--------------------------|-----------------|--|----------------|--|---------------|--|---------------|--|

|                    |                           |                    |                    |                   |                   |                 |                  |                  |                  |
|--------------------|---------------------------|--------------------|--------------------|-------------------|-------------------|-----------------|------------------|------------------|------------------|
|                    | <i>+industry response</i> | 174 (80 to 304)    |                    | 37 (1 to 83)      |                   | 43 (22 to 71)   |                  | 24 (6 to 48)     |                  |
| Race/Ethnicity     |                           |                    |                    |                   |                   |                 |                  |                  |                  |
| Non-Hispanic White | <i>consumer behavior</i>  | 0                  | 43<br>(-13 to 140) | 0                 | 0<br>(-29 to 35)  | 0               | 20<br>(3 to 42)  | 0                | 10<br>(-9 to 32) |
|                    | <i>+industry response</i> | 0                  | 82<br>(16 to 192)  | 0                 | 11<br>(-17 to 50) | 0               | 27<br>(10 to 51) | 0                | 16<br>(-2 to 40) |
| Non-Hispanic Black | <i>consumer behavior</i>  | 0                  | 2<br>(-31 to 51)   | 0                 | 9<br>(-7 to 30)   | 0               | 7<br>(-5 to 20)  | 0                | 4<br>(1 to 9)    |
|                    | <i>+industry response</i> | 0                  | 17<br>(-16 to 75)  | 0                 | 13<br>(-2 to 36)  | 0               | 9<br>(-3 to 23)  | 0                | 6<br>(2 to 11)   |
| Hispanic           | <i>consumer behavior</i>  | 0                  | 47<br>(7 to 103)   | 0                 | 7<br>(-2 to 20)   | 0               | 4<br>(1 to 9)    | 0                | 0<br>(-1 to 3)   |
|                    | <i>+industry response</i> | 0                  | 64<br>(23 to 127)  | 0                 | 10<br>(1 to 25)   | 0               | 6<br>(2 to 11)   | 0                | 1<br>(-1 to 3)   |
| Other              | <i>consumer behavior</i>  | 0                  | 1<br>(-4 to 12)    | 0                 | 0<br>(-2 to 3)    | 0               | 1<br>(0 to 2)    | 0                | 0<br>(-1 to 2)   |
|                    | <i>+industry response</i> | 0                  | 2<br>(-1 to 16)    | 0                 | 0<br>(-2 to 3)    | 0               | 1<br>(1 to 2)    | 0                | 1<br>(-1 to 2)   |
| <b>Ovarian</b>     |                           |                    |                    |                   |                   |                 |                  |                  |                  |
| Age                | <i>consumer behavior</i>  | 45 (-3 to 114)     |                    | 13 (-14 to 54)    |                   | 24 (9 to 51)    |                  | 21 (8 to 46)     |                  |
|                    | <i>+industry response</i> | 87 (19 to 175)     |                    | 25 (-4 to 75)     |                   | 34 (14 to 64)   |                  | 28 (15 to 56)    |                  |
| Race/Ethnicity     |                           |                    |                    |                   |                   |                 |                  |                  |                  |
| Non-Hispanic White | <i>consumer behavior</i>  | 21<br>(-15 to 89)  | 0                  | -3<br>(-29 to 38) | 0                 | 15<br>(2 to 41) | 0                | 19<br>(6 to 43)  | 0                |
|                    | <i>+industry response</i> | 45<br>(-10 to 131) | 0                  | 5<br>(-21 to 52)  | 0                 | 22<br>(5 to 51) | 0                | 25<br>(11 to 52) | 0                |
| Non-Hispanic Black | <i>consumer behavior</i>  | 7<br>(-3 to 27)    | 0                  | 3<br>(0 to 11)    | 0                 | 5<br>(2 to 11)  | 0                | 1<br>(-1 to 4)   | 0                |
|                    | <i>+industry response</i> | 13<br>(-1 to 38)   | 0                  | 5<br>(1 to 13)    | 0                 | 7<br>(3 to 13)  | 0                | 1<br>(0 to 5)    | 0                |
| Hispanic           | <i>consumer behavior</i>  | 15<br>(0 to 48)    | 0                  | 6<br>(-1 to 16)   | 0                 | 1<br>(-2 to 6)  | 0                | 1<br>(-1 to 4)   | 0                |
|                    | <i>+industry response</i> | 25<br>(2 to 64)    | 0                  | 8<br>(2 to 20)    | 0                 | 2<br>(-1 to 8)  | 0                | 2<br>(0 to 5)    | 0                |
| Other              | <i>consumer behavior</i>  | -5<br>(-13 to 9)   | 0                  | 5<br>(1 to 10)    | 0                 | 2<br>(0 to 4)   | 0                | 0<br>(-1 to 1)   | 0                |
|                    | <i>+industry response</i> | -1<br>(-9 to 15)   | 0                  | 5<br>(2 to 11)    | 0                 | 2<br>(1 to 4)   | 0                | 0<br>(0 to 1)    | 0                |

**Thyroid**

|                    |                           |              |              |              |              |             |             |            |             |
|--------------------|---------------------------|--------------|--------------|--------------|--------------|-------------|-------------|------------|-------------|
| Age                | <i>consumer behavior</i>  | 9 (2 to 22)  |              | 3 (-4 to 11) |              | 6 (3 to 12) |             | 4 (1 to 7) |             |
|                    | <i>+industry response</i> | 16 (7 to 33) |              | 6 (0 to 16)  |              | 9 (5 to 15) |             | 5 (3 to 9) |             |
| Race/Ethnicity     |                           |              |              |              |              |             |             |            |             |
| Non-Hispanic White | <i>consumer behavior</i>  | 0 (0 to 2)   | 0 (-1 to 5)  | 0 (-1 to 1)  | -2 (-7 to 5) | 0 (0 to 1)  | 3 (0 to 8)  | 1 (0 to 4) | 1 (-1 to 3) |
|                    | <i>+industry response</i> | 0 (0 to 3)   | 1 (0 to 9)   | 0 (-1 to 2)  | 0 (-5 to 9)  | 1 (0 to 2)  | 4 (1 to 10) | 2 (1 to 4) | 1 (0 to 4)  |
| Non-Hispanic Black | <i>consumer behavior</i>  | 1 (0 to 5)   | 1 (-2 to 7)  | 0 (0 to 1)   | 0 (0 to 2)   | 1 (0 to 2)  | 0 (0 to 1)  | 0 (0 to 1) | 0 (0 to 1)  |
|                    | <i>+industry response</i> | 2 (0 to 7)   | 2 (-1 to 10) | 0 (0 to 2)   | 0 (0 to 2)   | 1 (0 to 2)  | 0 (0 to 1)  | 0 (0 to 1) | 0 (0 to 1)  |
| Hispanic           | <i>consumer behavior</i>  | 3 (0 to 10)  | 1 (0 to 9)   | 1 (0 to 3)   | 2 (0 to 5)   | 0 (0 to 1)  | 1 (0 to 2)  | 0 (0 to 1) | 0 (0 to 1)  |
|                    | <i>+industry response</i> | 5 (1 to 14)  | 2 (0 to 12)  | 1 (0 to 4)   | 2 (1 to 7)   | 0 (0 to 1)  | 1 (0 to 3)  | 1 (0 to 2) | 0 (0 to 1)  |
| Other              | <i>consumer behavior</i>  | 0            | 0 (-1 to 3)  | 0 (0 to 1)   | 0 (-1 to 1)  | 0 (0 to 1)  | 0 (0 to 1)  | 0          | 0 (0 to 1)  |
|                    | <i>+industry response</i> | 0            | 0 (0 to 4)   | 0 (0 to 1)   | 0 (-1 to 2)  | 0 (0 to 1)  | 0 (0 to 1)  | 0          | 0 (0 to 1)  |

1. Values are the median estimates (95% uncertainty intervals) of each distribution of 1000 simulations.

**Supplementary Table 12.** Estimated health gains and costs associated with the federal menu calorie labeling on reducing cancer burdens in the US over a lifetime, one-way sensitivity analyses at 25% and 75% calorie compensation outside restaurant settings (US population=235,162,844)<sup>1</sup>

|                                             | Menu Calorie Labeling Policy                |                                                                    |                                             |                                                                    |
|---------------------------------------------|---------------------------------------------|--------------------------------------------------------------------|---------------------------------------------|--------------------------------------------------------------------|
|                                             | 75% Compensation                            |                                                                    | 25% Compensation                            |                                                                    |
|                                             | Consumer Behavior<br>Median (2.5% to 97.5%) | Consumer Behavior +<br>Industry Response<br>Median (2.5% to 97.5%) | Consumer Behavior<br>Median (2.5% to 97.5%) | Consumer Behavior +<br>Industry Response<br>Median (2.5% to 97.5%) |
| <b>New Cancer Cases Averted, N (95% UI)</b> |                                             |                                                                    |                                             |                                                                    |
| Liver cancer                                | 2550 (265 to 5030)                          | 4280 (2000 to 6770)                                                | 7760 (5160 to 10500)                        | 12800 (9790 to 16000)                                              |
| Endometrial cancer                          | 2490 (-633 to 5890)                         | 4640 (1570 to 8070)                                                | 8890 (5500 to 12700)                        | 15100 (11800 to 19100)                                             |
| Kidney cancer                               | 2360 (65 to 4510)                           | 4160 (1900 to 6410)                                                | 7810 (5230 to 10000)                        | 13000 (10400 to 15300)                                             |
| Breast cancer (postmenopausal)              | 2060 (-616 to 5280)                         | 3930 (1260 to 7200)                                                | 7640 (4560 to 11400)                        | 13000 (9700 to 17200)                                              |
| Pancreatic cancer                           | 638 (51 to 1280)                            | 1140 (536 to 1800)                                                 | 2140 (1490 to 2890)                         | 3590 (2840 to 4460)                                                |
| Esophageal adenocarcinoma                   | 598 (-239 to 1400)                          | 1100 (262 to 1930)                                                 | 2130 (1200 to 3000)                         | 3560 (2600 to 4520)                                                |
| Colorectal cancer                           | 480 (56 to 940)                             | 851 (423 to 1330)                                                  | 1600 (1060 to 2140)                         | 2660 (2030 to 3310)                                                |
| Multiple myeloma                            | 343 (61 to 674)                             | 576 (281 to 950)                                                   | 1050 (677 to 1480)                          | 1730 (1240 to 2340)                                                |
| Stomach cancer (cardia)                     | 312 (-42 to 736)                            | 533 (192 to 998)                                                   | 994 (555 to 1530)                           | 1640 (1060 to 2300)                                                |
| Thyroid cancer                              | 185 (-70 to 498)                            | 406 (128 to 749)                                                   | 851 (473 to 1310)                           | 1470 (963 to 2100)                                                 |
| Gallbladder cancer                          | 165 (70 to 274)                             | 266 (167 to 378)                                                   | 468 (348 to 602)                            | 758 (626 to 912)                                                   |
| Advanced prostate cancer                    | 162 (-28 to 360)                            | 282 (87 to 493)                                                    | 519 (304 to 768)                            | 868 (603 to 1160)                                                  |
| Ovarian cancer                              | 65 (-17 to 179)                             | 119 (26 to 245)                                                    | 228 (96 to 398)                             | 384 (196 to 617)                                                   |
| Total                                       | 12700 (2430 to 24200)                       | 22600 (12400 to 34100)                                             | 42800 (30400 to 53900)                      | 71500 (59100 to 82800)                                             |
| <b>Cancer Deaths Prevented, N (95% UI)</b>  |                                             |                                                                    |                                             |                                                                    |
| Liver cancer                                | 2200 (199 to 4450)                          | 3750 (1720 to 5970)                                                | 6790 (4490 to 9270)                         | 11200 (8570 to 14100)                                              |
| Breast cancer (postmenopausal)              | 1140 (-958 to 3640)                         | 2420 (281 to 4990)                                                 | 4980 (2540 to 7860)                         | 8670 (6030 to 12000)                                               |
| Endometrial cancer                          | 980 (-69 to 2030)                           | 1710 (675 to 2770)                                                 | 3160 (2020 to 4450)                         | 5270 (4120 to 6630)                                                |
| Kidney cancer                               | 939 (94 to 1820)                            | 1630 (795 to 2520)                                                 | 3020 (2080 to 3930)                         | 4990 (4020 to 6020)                                                |
| Pancreatic cancer                           | 561 (54 to 1120)                            | 996 (473 to 1590)                                                  | 1870 (1300 to 2510)                         | 3130 (2480 to 3890)                                                |
| Esophageal adenocarcinoma                   | 503 (-224 to 1190)                          | 932 (203 to 1640)                                                  | 1820 (1010 to 2580)                         | 3050 (2220 to 3890)                                                |
| Colorectal cancer                           | 323 (41 to 640)                             | 571 (280 to 910)                                                   | 1080 (724 to 1440)                          | 1800 (1390 to 2240)                                                |
| Stomach cancer (cardia)                     | 264 (-32 to 623)                            | 446 (159 to 838)                                                   | 824 (454 to 1280)                           | 1360 (887 to 1910)                                                 |
| Multiple myeloma                            | 213 (45 to 411)                             | 350 (178 to 576)                                                   | 635 (419 to 897)                            | 1040 (757 to 1370)                                                 |
| Gallbladder cancer                          | 141 (60 to 234)                             | 226 (142 to 320)                                                   | 398 (300 to 512)                            | 644 (531 to 777)                                                   |
| Advanced prostate cancer                    | 80 (-12 to 179)                             | 135 (44 to 239)                                                    | 246 (144 to 373)                            | 410 (278 to 563)                                                   |
| Ovarian cancer                              | 49 (-7 to 123)                              | 87 (26 to 170)                                                     | 162 (76 to 270)                             | 272 (155 to 415)                                                   |
| Thyroid cancer                              | 11 (1 to 24)                                | 19 (8 to 33)                                                       | 34 (21 to 53)                               | 56 (39.9 to 81.8)                                                  |
| Total                                       | 7760 (1280 to 13900)                        | 13600 (7160 to 20100)                                              | 25600 (17900 to 32300)                      | 42500 (34600 to 49600)                                             |
| <b>Life Years Gained</b>                    | 34700 (5070 to 66300)                       | 62200 (32500 to 93500)                                             | 118000 (82400 to 151000)                    | 197000 (161000 to 232000)                                          |

|                                                                                  |                        |                         |                           |                           |
|----------------------------------------------------------------------------------|------------------------|-------------------------|---------------------------|---------------------------|
| <b>QALYs Gained</b>                                                              | 51400 (9690 to 95700)  | 90500 (49300 to 135000) | 171000 (119000 to 218000) | 284000 (234000 to 334000) |
| <b>Changes in Health-Related Costs, Cancer Only (\$, millions)<sup>2,3</sup></b> |                        |                         |                           |                           |
| Healthcare (medical) cost                                                        | -693 (-1250 to -138)   | -1210 (-1770 to -660)   | -2270 (-2850 to -1640)    | -3760 (-4360 to -3140)    |
| Patient time cost                                                                | -47.9 (-90.0 to -11.9) | -83.6 (-126 to -47.3)   | -155 (-198 to -113)       | -258 (-302 to -215)       |
| Productivity loss                                                                | -279 (-527 to -56.6)   | -490 (-743 to -271)     | -929 (-1170 to -673)      | -1550 (-1800 to -1290)    |
| <b>Policy Implementation Costs (\$, millions)<sup>2,3</sup></b>                  |                        |                         |                           |                           |
| Government cost                                                                  | 18.5 (14.5 to 25.1)    | 18.5 (14.4 to 25.5)     | 18.5 (14.5 to 25.1)       | 18.5 (14.4 to 25.5)       |
| Administration                                                                   | 9.07 (8.61 to 9.56)    | 9.09 (8.62 to 9.55)     | 9.07 (8.61 to 9.56)       | 9.09 (8.62 to 9.55)       |
| Monitoring                                                                       | 9.40 (5.45 to 16.1)    | 9.38 (5.30 to 16.3)     | 9.40 (5.45 to 16.1)       | 9.38 (5.30 to 16.3)       |
| Industry cost                                                                    | 820 (762 to 889)       | 1120 (1040 to 1210)     | 820 (762 to 889)          | 1120 (1040 to 1210)       |
| Compliance                                                                       | 820 (762 to 889)       | 823 (757 to 889)        | 820 (762 to 889)          | 823 (757 to 889)          |
| Reformulation                                                                    | -----                  | 296 (249 to 353)        | -----                     | 296 (249 to 353)          |
| <b>Net Costs, Cancer Only (\$, millions)<sup>2,3,4</sup></b>                     |                        |                         |                           |                           |
| Societal perspective                                                             | -174 (-1032 to 639)    | -653 (-1510 to 164)     | -2520 (-3390 to -1590)    | -4430 (-5310 to -3510)    |
| Healthcare perspective                                                           | -674 (-1229 to -120)   | -1190 (-1750 to -639)   | -2250 (-2830 to -1620)    | -3740 (-4350 to -3120)    |
| <b>ICER (dollars/QALY)<sup>5</sup></b>                                           |                        |                         |                           |                           |
| Societal perspective                                                             | Dominant               | Dominant                | Dominant                  | Dominant                  |
| Healthcare perspective                                                           | Dominant               | Dominant                | Dominant                  | Dominant                  |

Abbreviations: ICER, Incremental Cost-Effectiveness Ratio; QALY, quality-adjusted life years.

1. Values are the median estimates (95% uncertainty intervals) of each distribution of 1000 simulations.

2. Health-related costs were inflated to 2015 US dollars using the Personal Health Care (PHC) index. Policy intervention costs were inflated to 2015 US dollars using the Consumer Price Index. Negative costs represent savings.

3. Costs are medians from 1000 simulations so may not add up to totals.

4. Net costs were calculated as policy costs minus health-related costs from reduced cancer burden. Societal perspective includes healthcare cost, patient time costs, productivity costs, and policy implementation costs; government perspective included policy costs relevant to policy implementation and program monitoring and evaluation and medical costs.

5. ICER threshold was evaluated at \$150,000/QALY. Dominant represents less costly and more effective than the "no-policy intervention" scenario.

**Supplementary Table 13.** Estimated health gains and costs associated with the federal menu calorie labeling on reducing cancer burdens in the US over a lifetime, one-way sensitivity analysis, assuming all full-service and fast-food restaurants were covered by the policy (US population=235,162,844)<sup>1</sup>

|                                                                                  | Menu Calorie Labeling Policy                |                                                                 |
|----------------------------------------------------------------------------------|---------------------------------------------|-----------------------------------------------------------------|
|                                                                                  | Consumer Behavior<br>Median (2.5% to 97.5%) | Consumer Behavior + Industry Response<br>Median (2.5% to 97.5%) |
| <b>New Cancer Cases Averted, N (95% UI)</b>                                      |                                             |                                                                 |
| Liver cancer                                                                     | 7280 (4690 to 10100)                        | 11400 (8480 to 14400)                                           |
| Kidney cancer                                                                    | 6820 (4180 to 9460)                         | 11100 (8470 to 13700)                                           |
| Endometrial cancer                                                               | 5340 (1540 to 9220)                         | 10400 (6690 to 14300)                                           |
| Breast cancer (postmenopausal)                                                   | 4920 (1580 to 8420)                         | 9380 (5960 to 13100)                                            |
| Esophageal adenocarcinoma                                                        | 2060 (1170 to 3060)                         | 3260 (2310 to 4330)                                             |
| Pancreatic cancer                                                                | 1810 (1150 to 2600)                         | 3000 (2290 to 3870)                                             |
| Colorectal cancer                                                                | 1320 (772 to 1910)                          | 2200 (1600 to 2880)                                             |
| Stomach cancer (cardia)                                                          | 938 (531 to 1510)                           | 1480 (985 to 2140)                                              |
| Thyroid cancer                                                                   | 746 (430 to 1180)                           | 1270 (850 to 1820)                                              |
| Multiple myeloma                                                                 | 710 (377 to 1150)                           | 1270 (879 to 1820)                                              |
| Advanced prostate cancer                                                         | 430 (208 to 681)                            | 715 (461 to 1010)                                               |
| Gallbladder cancer                                                               | 329 (201 to 457)                            | 568 (435 to 708)                                                |
| Ovarian cancer                                                                   | 133 (20.9 to 292)                           | 263 (109 to 468)                                                |
| Total                                                                            | 32900 (20300 to 46000)                      | 56400 (43700 to 69300)                                          |
| <b>Cancer Deaths Prevented, N (95% UI)</b>                                       |                                             |                                                                 |
| Liver cancer                                                                     | 6460 (4170 to 8980)                         | 10000 (7480 to 12800)                                           |
| Breast cancer (postmenopausal)                                                   | 3410 (701 to 6280)                          | 6440 (3560 to 9750)                                             |
| Kidney cancer                                                                    | 2620 (1610 to 3620)                         | 4250 (3210 to 5300)                                             |
| Endometrial cancer                                                               | 1890 (654 to 3140)                          | 3610 (2390 to 4900)                                             |
| Esophageal adenocarcinoma                                                        | 1800 (1030 to 2670)                         | 2840 (2010 to 3750)                                             |
| Pancreatic cancer                                                                | 1580 (976 to 2250)                          | 2620 (1990 to 3380)                                             |
| Colorectal cancer                                                                | 923 (560 to 1310)                           | 1520 (1110 to 1970)                                             |
| Stomach cancer (cardia)                                                          | 785 (437 to 1270)                           | 1240 (812 to 1790)                                              |
| Multiple myeloma                                                                 | 431 (234 to 709)                            | 762 (524 to 1100)                                               |
| Gallbladder cancer                                                               | 275 (170 to 385)                            | 479 (366 to 601)                                                |
| Advanced prostate cancer                                                         | 219 (117 to 351)                            | 353 (233 to 506)                                                |
| Ovarian cancer                                                                   | 94 (18 to 197)                              | 185 (91 to 317)                                                 |
| Thyroid cancer                                                                   | 27 (13 to 45)                               | 45 (28 to 68)                                                   |
| Total                                                                            | 7760 (1280 to 13900)                        | 34400 (26800 to 42400)                                          |
| <b>Life Years Gained</b>                                                         | 97300 (62300 to 135000)                     | 162000 (126000 to 201000)                                       |
| <b>QALYs Gained</b>                                                              | 20500 (13100 to 28500)                      | 230000 (178000 to 287000)                                       |
| <b>Changes in Health-Related Costs, Cancer Only (\$, millions)<sup>2,3</sup></b> |                                             |                                                                 |



|                                                                 |                        |                        |
|-----------------------------------------------------------------|------------------------|------------------------|
| Healthcare (medical) cost                                       | -1820 (-2500 to -1180) | -3060 (-3740 to -2400) |
| Patient time cost                                               | -112 (-160 to -62.7)   | -197 (-245 to -148)    |
| Productivity loss                                               | -692 (-976 to -401)    | -1210 (-1490 to -916)  |
| <b>Policy Implementation Costs (\$, millions)<sup>2,3</sup></b> |                        |                        |
| Government cost                                                 | 18.4 (14.7 to 25.7)    | 18.4 (14.7 to 25.7)    |
| Administration                                                  | 9.06 (8.56 to 9.52)    | 9.07 (8.60 to 9.56)    |
| Monitoring                                                      | 9.32 (5.61 to 16.5)    | 9.37 (5.64 to 16.6)    |
| Industry cost                                                   | 821 (764 to 888)       | 1120 (1040 to 1200)    |
| Compliance                                                      | 821 (764 to 888)       | 821 (763 to 886)       |
| Reformulation                                                   | -----                  | 297 (248 to 350)       |
| <b>Net Costs, Cancer Only (\$, millions)<sup>2,3,4</sup></b>    |                        |                        |
| Societal perspective                                            | -1780 (-2790 to -831)  | -1030 (-1590 to -549)  |
| Healthcare perspective                                          | -1800 (-2470 to -1160) | -1670 (-2120 to -1270) |
| <b>ICER (dollars/QALY)<sup>5</sup></b>                          |                        |                        |
| Societal perspective                                            | Dominant               | Dominant               |
| Healthcare perspective                                          | Dominant               | Dominant               |

Abbreviations: ICER, Incremental Cost-Effectiveness Ratio; QALY, quality-adjusted life years.

1. Values are the median estimates (95% uncertainty intervals) of each distribution of 1000 simulations.

2. Health-related costs were inflated to 2015 US dollars using the Personal Health Care (PHC) index. Policy intervention costs were inflated to 2015 US dollars using the Consumer Price Index. Negative costs represent savings.

3. Costs are medians from 1000 simulations so may not add up to totals.

4. Net costs were calculated as policy costs minus health-related costs from reduced cancer burden. Societal perspective includes healthcare cost, patient time costs, productivity costs, and policy implementation costs; government perspective included policy costs relevant to policy implementation and program monitoring and evaluation and medical costs.

5. ICER threshold was evaluated at \$150,000/QALY. Dominant represents less costly and more effective than the "no-policy intervention" scenario.

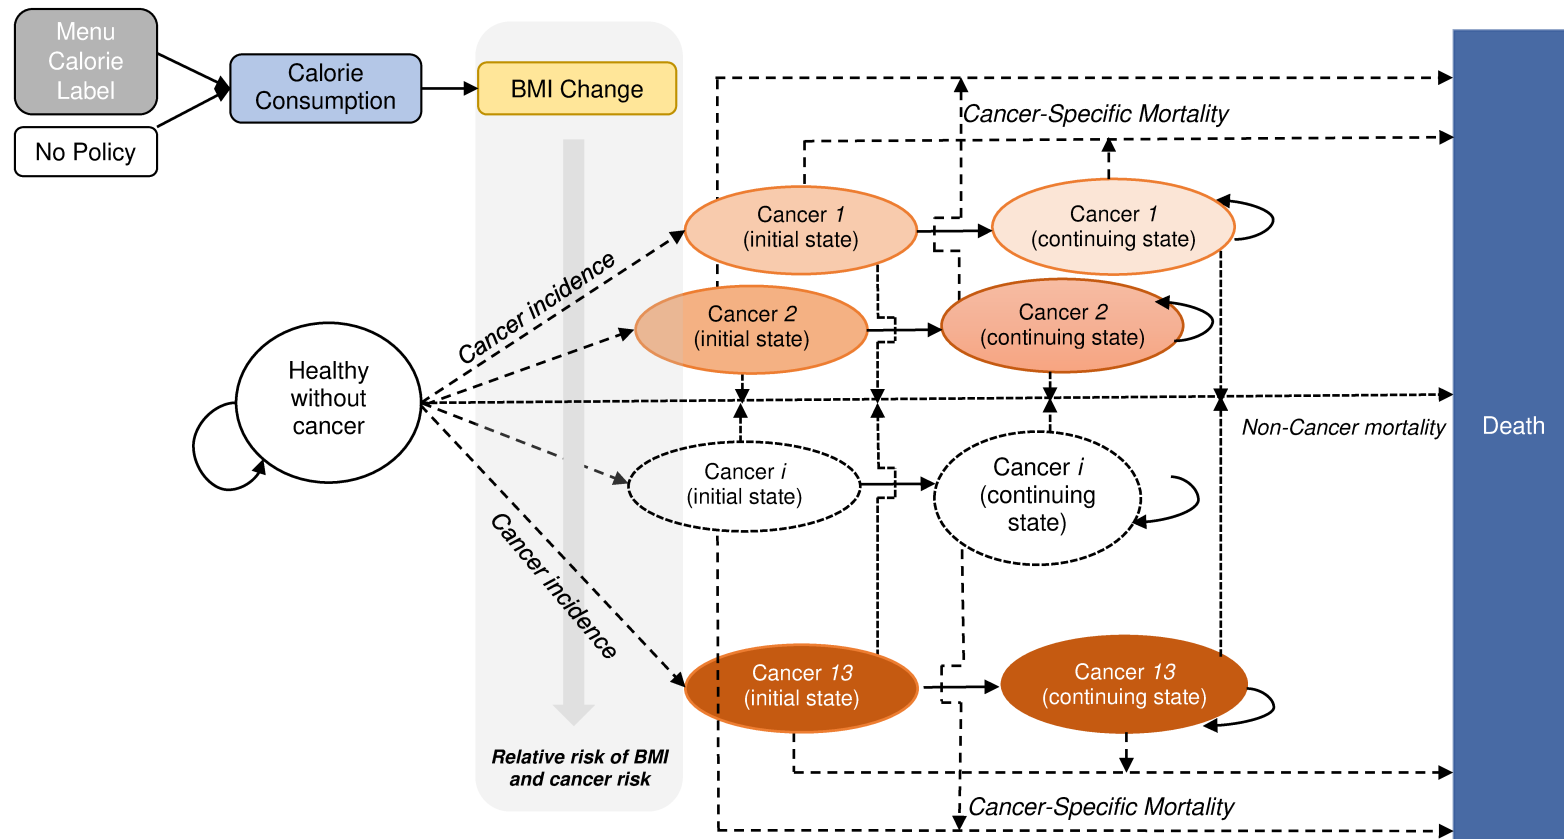

**Supplementary Figure 1. Diet and Cancer Outcome Model (DiCOM)**

The model consists of four general health states: (a) healthy without cancer (healthy state); (b) initial cancer diagnosis (initial state) for each cancer type  $i$ ; (c) continuing care (continuing state) for each cancer type  $i$ ; and (d) death state. Transitions between states are based on national cancer incidence and cancer-specific mortality rates from SEER (for individual with cancer) and lifetable-based mortality rates (for individuals without cancer). The model simulates the policy impact on the number of new cases and deaths of 13 obesity-associated cancers, health-related quality of life (HRQOL), and health-related costs among U.S. adults over a lifetime by comparing a policy scenario (menu calorie label) to a non-policy scenario (status quo).

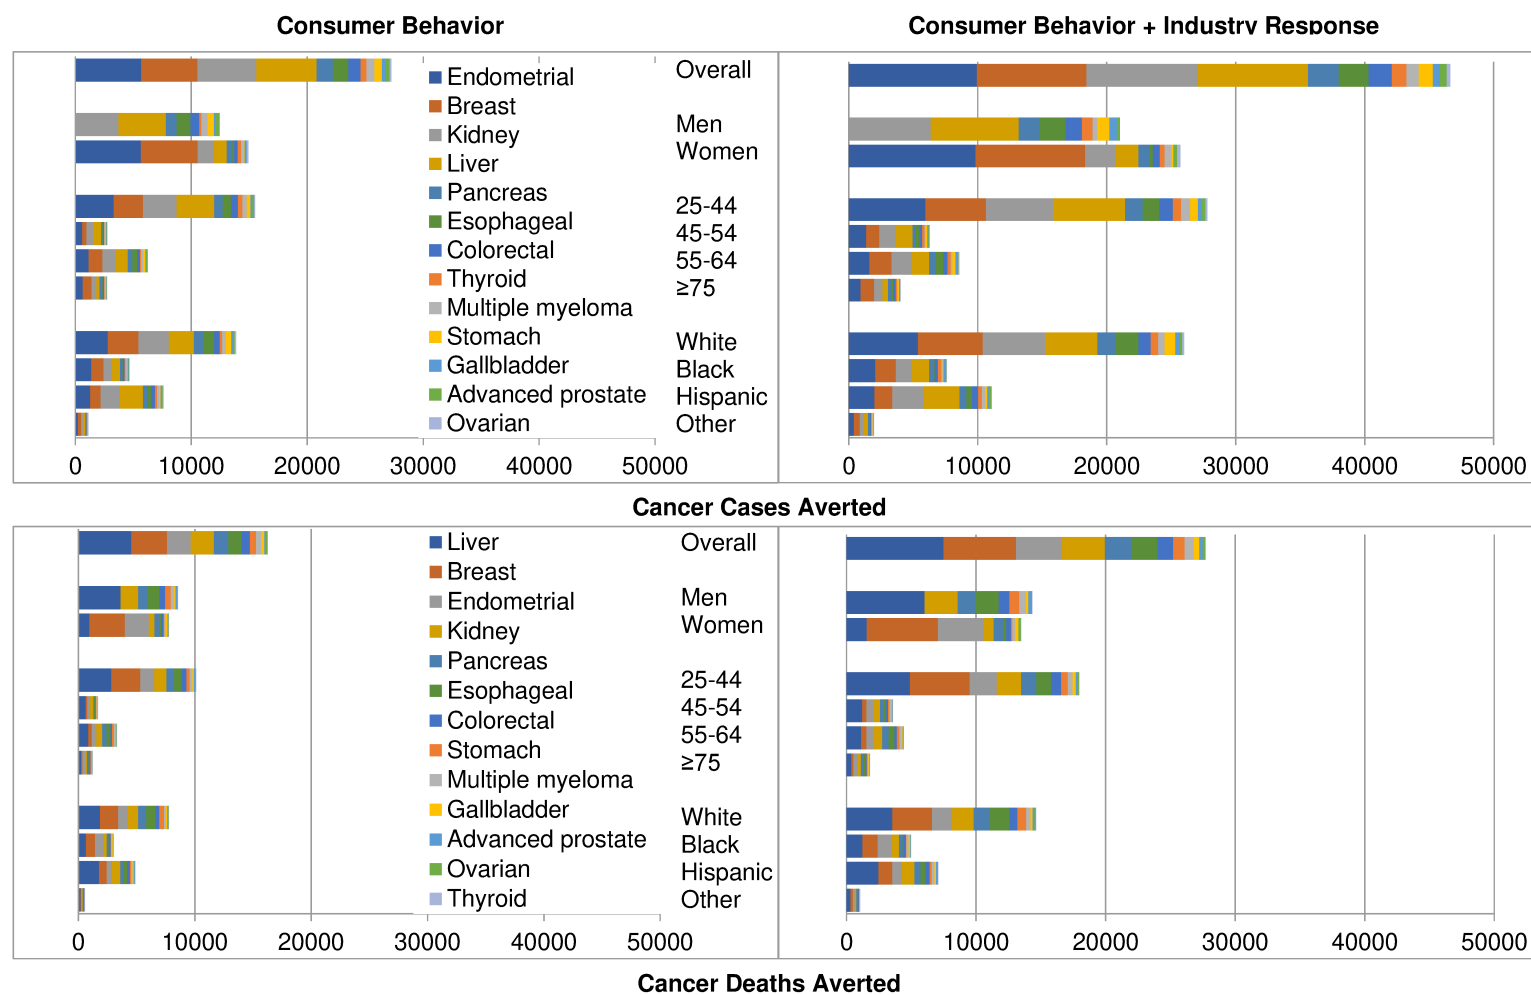

**Supplementary Figure 2.** Estimated reduced new cancer cases and deaths associated with the federal menu calorie labeling in the US by age, sex, race/ethnicity, and cancer type, over lifetime

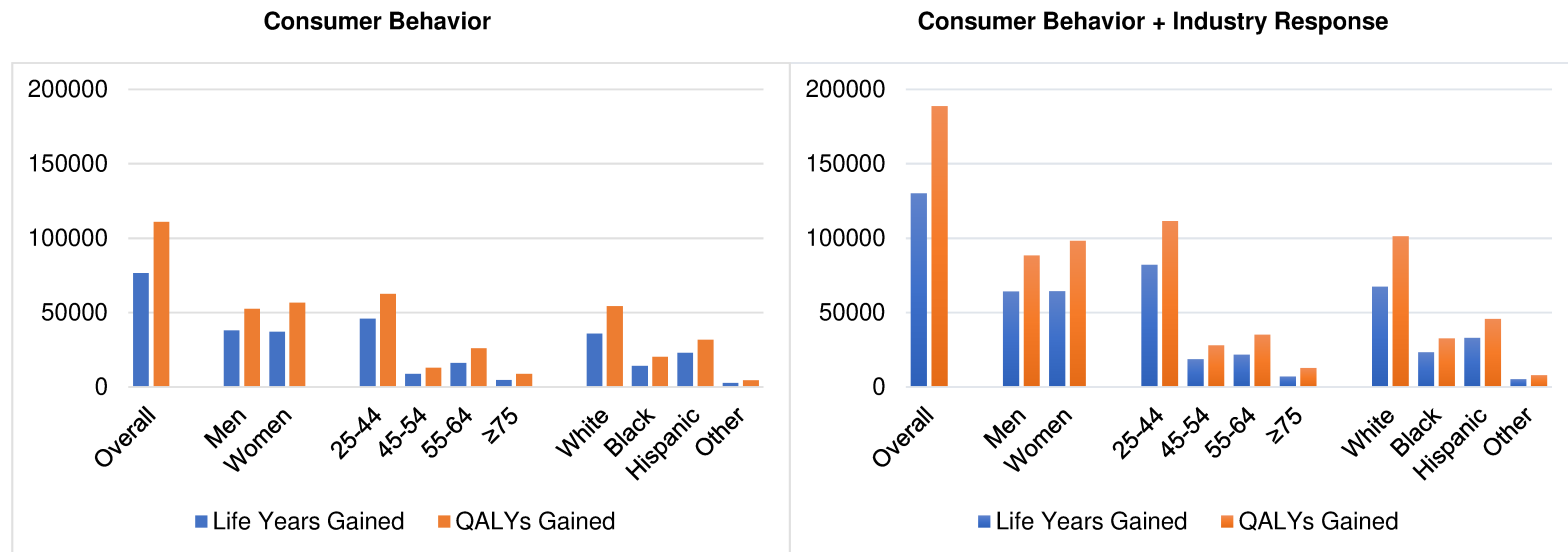

**Supplementary Figure 3.** Estimated life years and QALYs gained associated with the federal menu calorie labeling in the US by age, sex, and race/ethnicity, over a lifetime

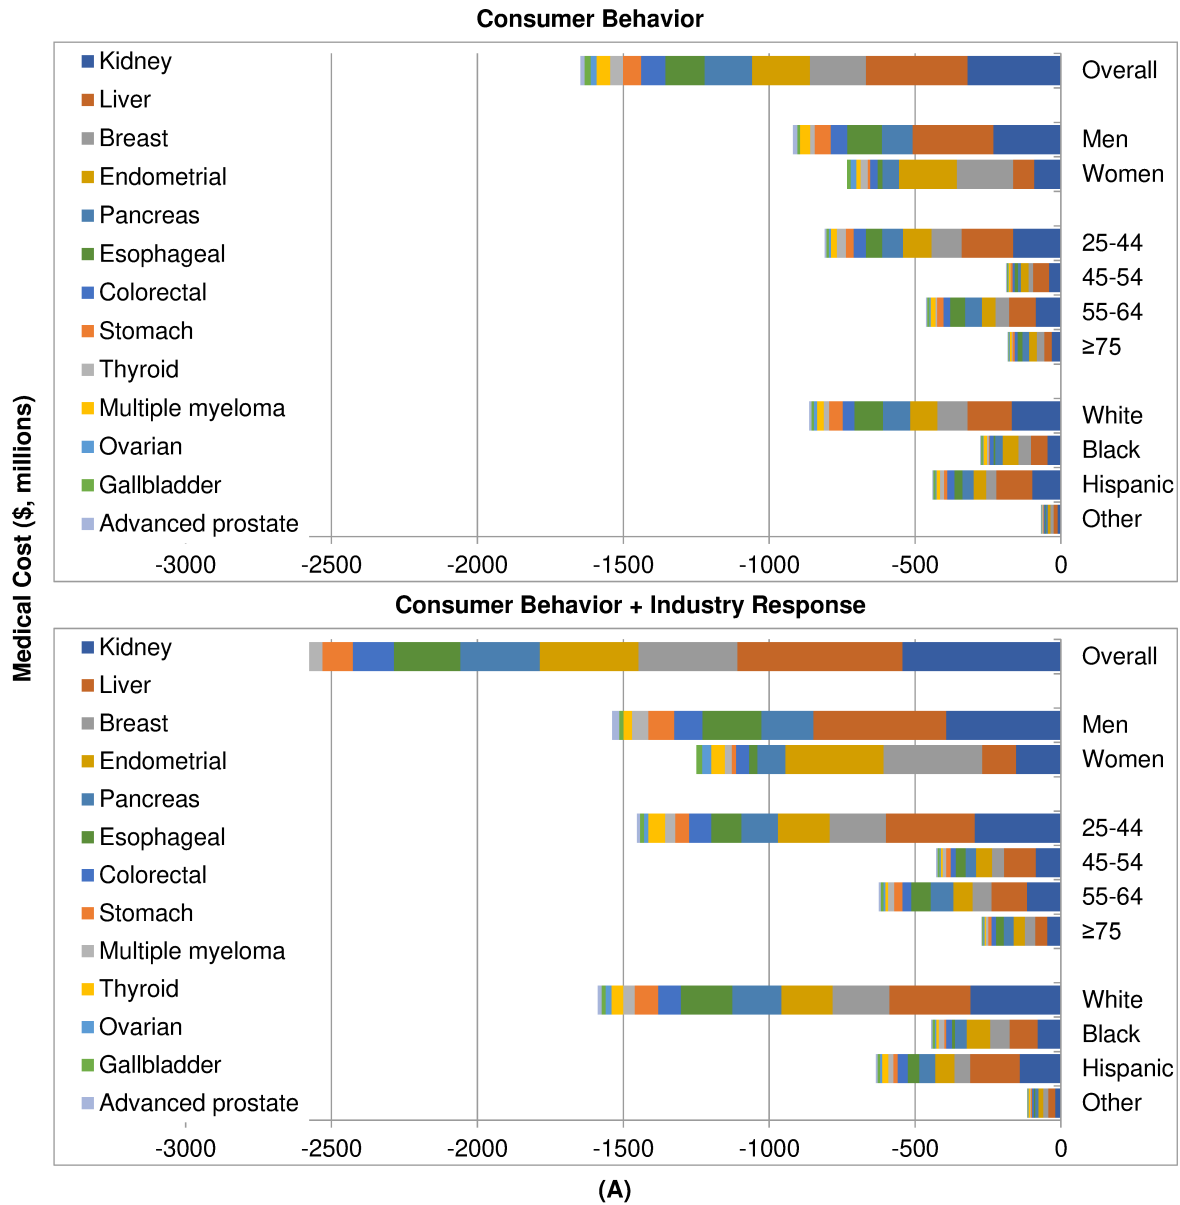

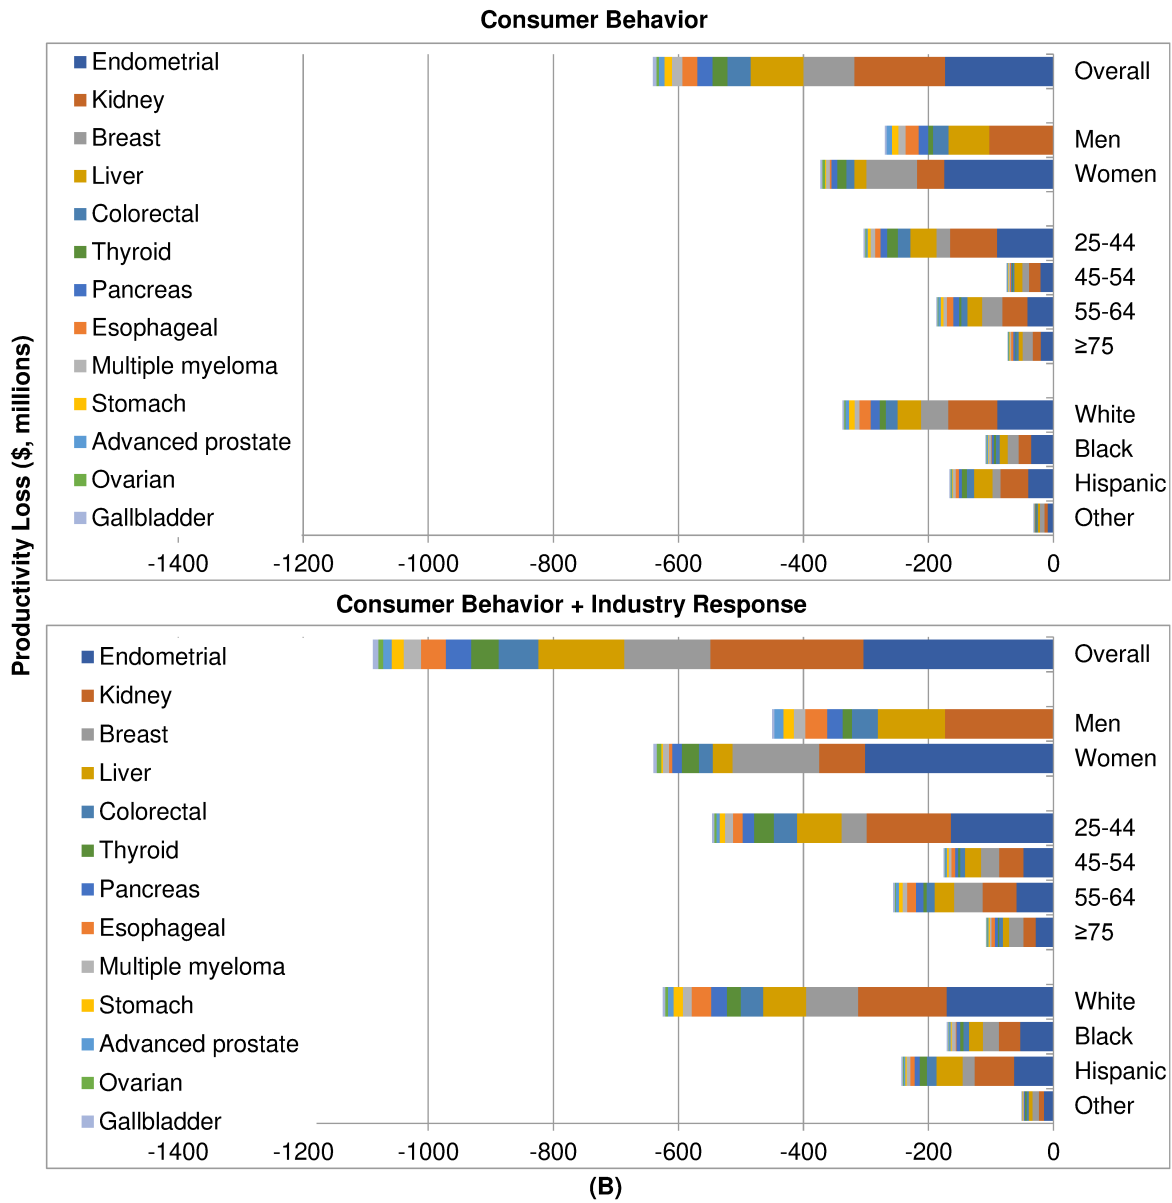

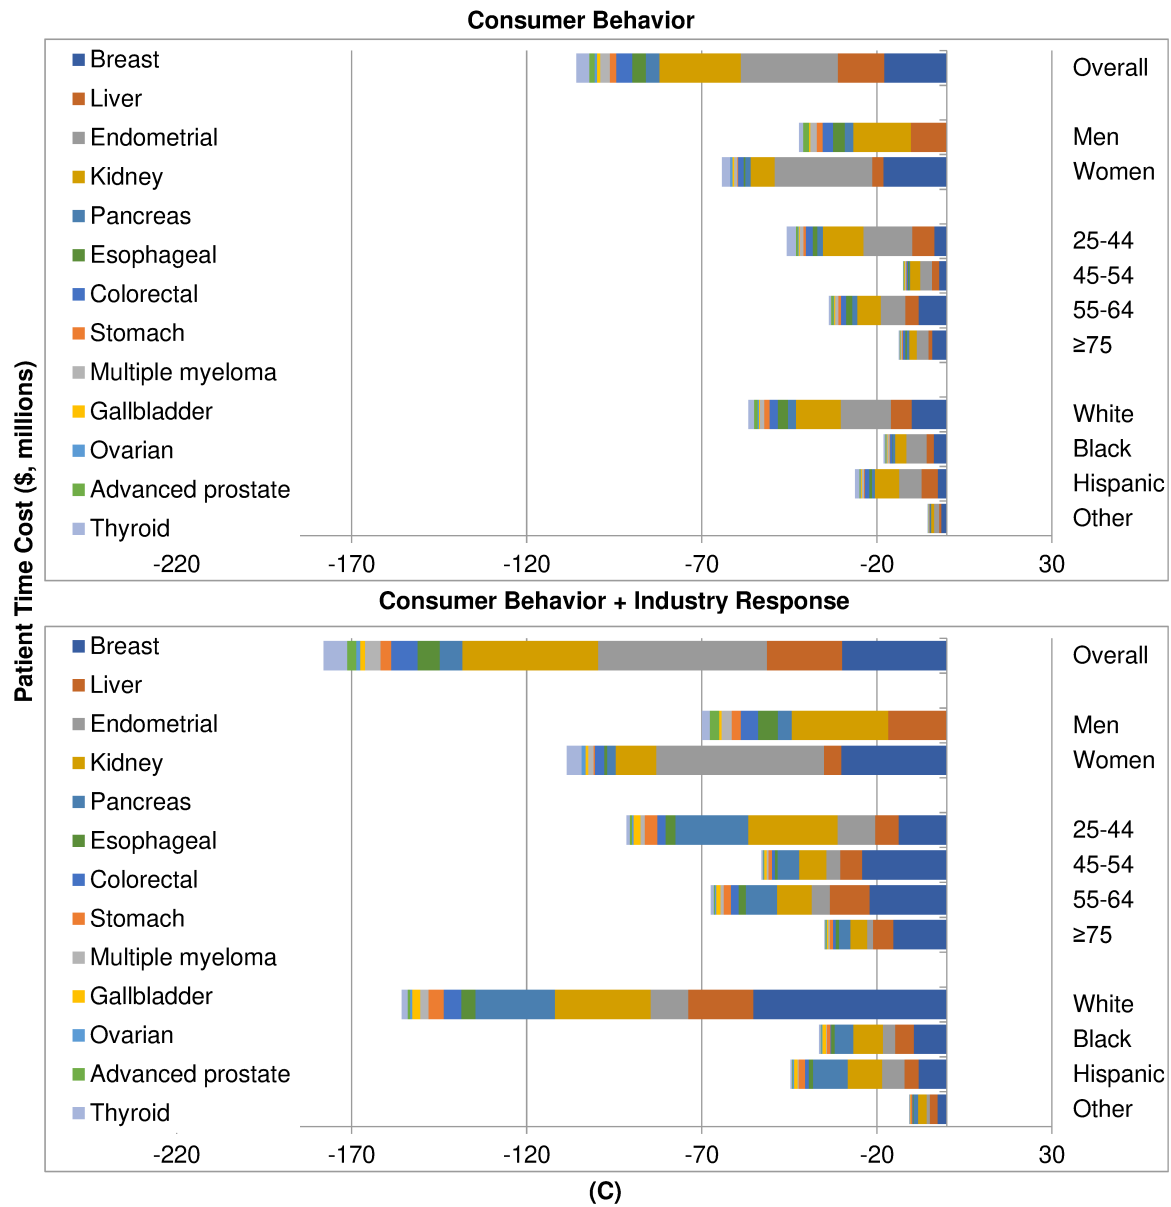

**Supplementary Figure 4.** Estimated changes of health-related costs associated with the federal menu calorie labeling in the US by age, sex, race/ethnicity, and cancer type, over lifetime

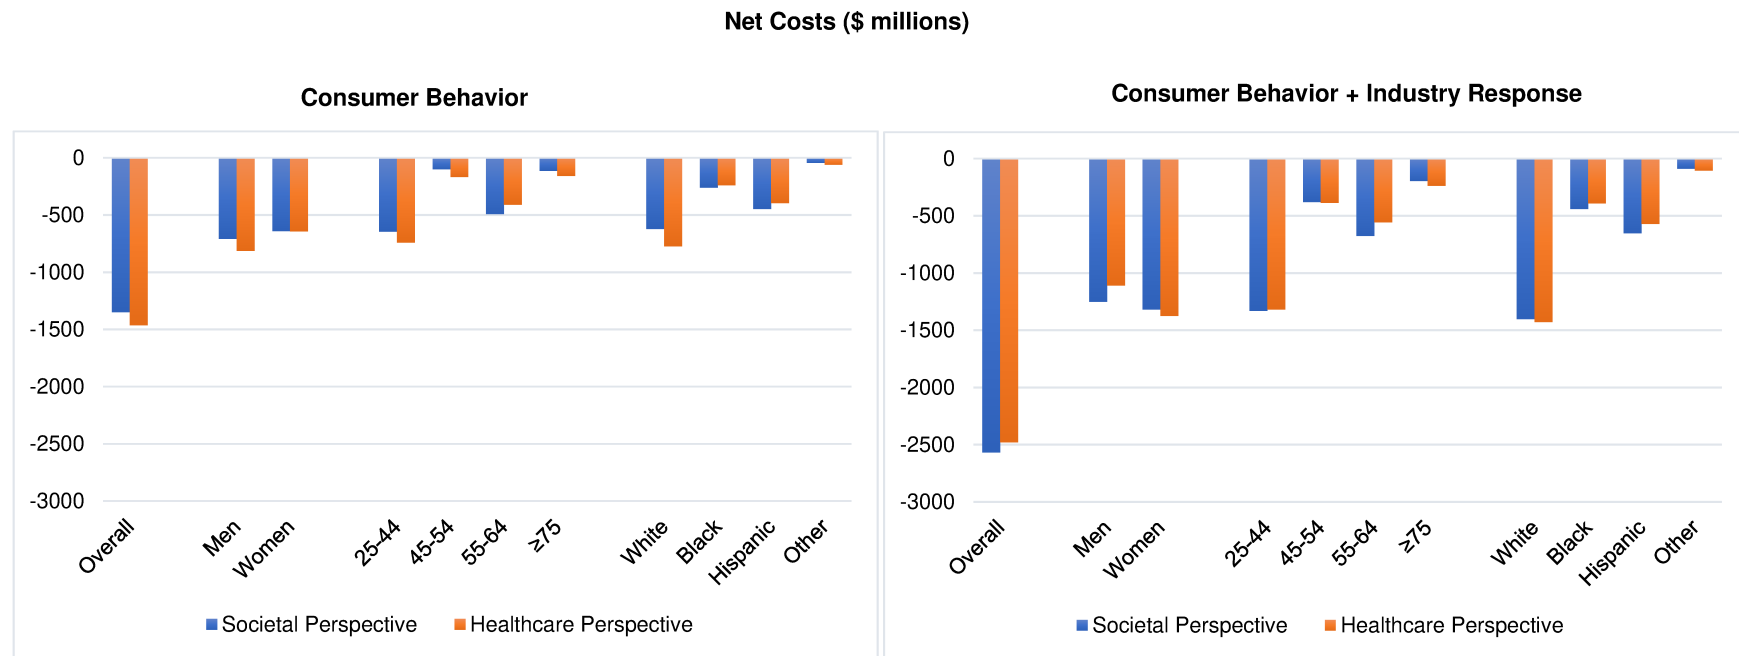

**Supplementary Figure 5.** Estimated net costs from societal and government perspectives associated with the federal menu calorie labeling policy in the US by age, sex, and race/ethnicity, over a lifetime



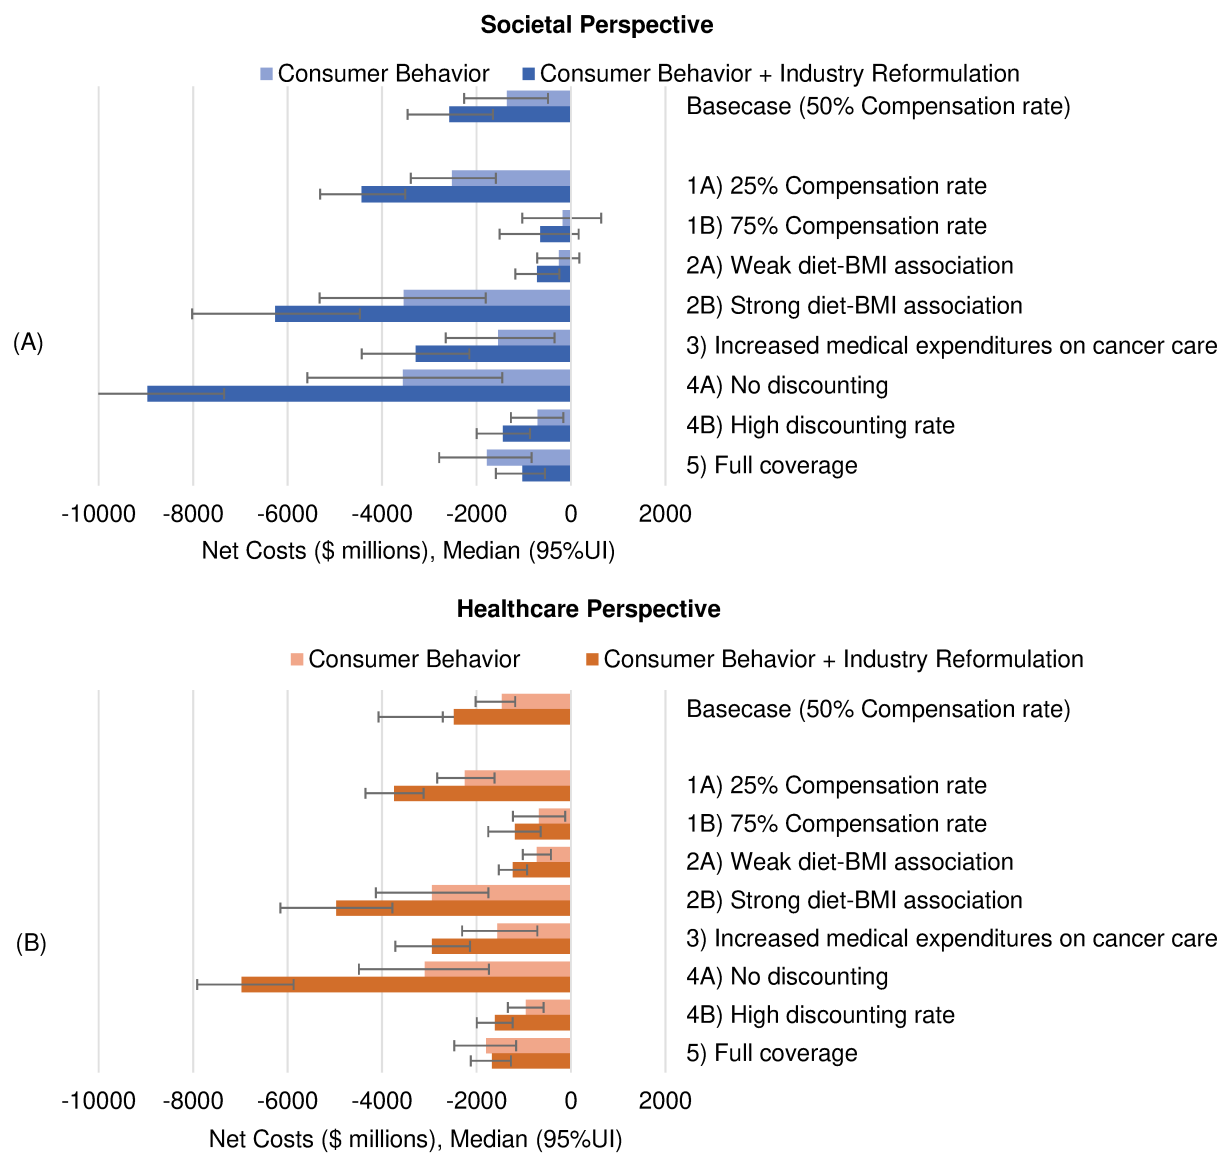

**Supplementary Figure 6.** One-Way Sensitivity Analysis of Net Costs of Menu Calorie Labeling and Obesity-Associated Cancer Rates by Varying Assumptions of Key Input Parameters From (A) Societal Perspective and (B) Healthcare Perspective

1a) assumed that only 25% of calorie reduction as a result of industry response would translate into long-term reductions in daily calories; 1b) assumed that only 75% of calorie reduction as a result of industry response would translate into long-term reductions in daily calories; 2a) weaker diet-BMI association assumed half of the base-case diet-BMI association; 2b) stronger diet-BMI association assumed two times of the base-case diet-BMI association; 3) 2% annual increase in medical expenditure on cancer care; 4a) lower discounting rate assumed 0% discounting rate; 4b) higher discounting rate assumed 5% discounting rate; and 5) assumed the coverage of the FDA's final rule increasing from 56.5% to 100% of the calories from full-service restaurants. Under base-case scenario (policy effect assumed consumer behavior: -7.3%, and industry reformulation: -5.0%; assumed that only 50% of calorie reduction as a result of industry response would translate into long-term reductions in daily calories; diet-BMI association assumed healthy-weight: 0.0015 kg/m<sup>2</sup> per kcal, and overweight/obese: 0.003 kg/m<sup>2</sup> per kcal; medical expenditure on cancer care assumed 0% annual increase; discounting rate assumed 3%; policy coverage would affect 56.5% of calories consumed at full-service restaurants and 100% of calories consumed at fast-food restaurants), the policy was cost-saving from both societal and healthcare perspectives. The policy remained cost-saving for all sensitivity analyses from the healthcare perspective and from societal perspective with additional industry reformulation. With consumer behavior alone, the policy was cost-saving under all scenarios.
